# Supplementary material for: Catalytic generation of ortho -quinone dimethides via donor/donor rhodium carbenes
Source: Royal Society of Chemistry journal article supplement (doi:10.1039/d3sc00734k), 2023-01-01
Supplement: d3sc00734k1.pdf [file d3sc00734k1.pdf]

# Catalytic Generation of *ortho*-Quinone Dimethides via Donor/Donor Rhodium Carbenes

Mingchun Gao, Jose M. Ruiz, Emily Jimenez, Anna Lo, Croix J. Laconsay, James C. Fettinger, Dean J. Tantillo, and Jared T. Shaw\*

Department of Chemistry, University of California, One Shields Ave, Davis, CA 95616, United State

E-mail: jtshaw@ucdavis.edu (J.T.S.)

## Table of Contents

|                                                    |     |
|----------------------------------------------------|-----|
| GENERAL INFORMATION .....                          | 2   |
| EXPERIMENTAL PROCEDURES AND CHARACTERIZATION ..... | 3   |
| [4+2] CYCLOADDITION.....                           | 4   |
| REFERENCES.....                                    | 57  |
| COMPUTATIONAL METHODS.....                         | 59  |
| X-RAY STRUCTURE DATA .....                         | 92  |
| COPY OF NMR SPECTRA .....                          | 313 |

## General Information

Chemicals were purchased and used without further purification unless otherwise specified. All reactions using anhydrous solvents were carried out in flame-dried glassware with magnetic stirring. Anhydrous solvent was dispensed from a solvent purification system that passes solvent through two columns of dry neutral alumina. Reactions were monitored by thin layer chromatography (TLC, Merck), and detected by examination under UV light (254 nm and 365 nm). Flash column chromatography was performed using silica gel [230–400 mesh (40–63  $\mu\text{m}$ )]. Extracts were concentrated *in vacuo* using both a rotary evaporator (bath temperatures up to 40 °C) at a pressure of  $\geq 10$  torr (diaphragm pump). High vacuum procedures were carried out at room temperature at a pressure of 1 mtorr (diaphragm pump) or  $\geq 1000$  mtorr (oil pump).  $^1\text{H}$  and proton-decoupled  $^{13}\text{C}$  spectra were measured at 400, 600 or 800 MHz, and 101, 151 or 201 MHz respectively unless otherwise noted.  $^1\text{H}$  NMR spectra in  $\text{CDCl}_3$ , Acetone- $d_6$ ,  $\text{CD}_2\text{Cl}_2$ , DMSO- $d_6$ ,  $\text{C}_6\text{D}_6$  were referenced at 0 ppm (TMS), 2.05 ppm, 5.32 ppm, 2.50 ppm and 7.16 ppm, respectively.  $^{13}\text{C}$  NMR spectra in  $\text{CDCl}_3$ , Acetone- $d_6$ ,  $\text{CD}_2\text{Cl}_2$ , DMSO- $d_6$ ,  $\text{C}_6\text{D}_6$  were referenced at 77.16 ppm, 29.84 ppm, 53.84 ppm, 39.52 ppm and 128.06 ppm, respectively. Multiplicities are given as: s (singlet), d (doublet), t (triplet), q (quartet), p (pentet), m (multiplet), or combinations of these signals. Apparent signals are indicated with *app.* and are used when signals with multiple couplings appear to form a certain peak type. High-resolution mass spectrometry was performed on positive mode, and ESI/Orbitrap<sup>TM</sup>, ESI/TOF, and CI/TOF techniques were generally used. For some substrates, high-resolution mass spectrometry using the aforementioned techniques was not achieved; low-resolution mass spectrometry using an Advion<sup>©</sup> ASAP-APCI-MS was achieved and the corresponding data is reported. Melting points were taken on an EZ-melting apparatus and were uncorrected. Infrared spectra were taken on a Bruker Tensor 27 spectrometer. All microwave experiments were run in a Biotage Initiator EXP EU 400W microwave synthesizer 2.0 serial number 11031. NOTE: it is necessary that the  $\text{MnO}_2$  used for the oxidation of hydrazones be  $\sim 85\%$  pure with an average particle size of 2 microns, appearing as a fine black powder.

## Experimental Procedures and Characterization

**General Procedure A (acetal synthesis).** To a flame-dried round bottom were added aldehyde, diol (1.1-4.0 equiv), *p*-toluenesulfonic acid monohydrate (0.02-0.2 equiv) and toluene or benzene (0.33-1.0 M). The resulting solution was heated under reflux with Dean-Stark trap. Upon full conversion monitored by  $^1\text{H}$  NMR, the reaction was quenched with 15% NaOH aqueous solution or saturated  $\text{NaHCO}_3$  aqueous solution and extracted with EtOAc ( $3 \times 20$  mL). The combined organic phases were washed with  $\text{H}_2\text{O}$  ( $1 \times 10$  mL) and brine ( $1 \times 10$  mL). The organic phase was dried over anhydrous  $\text{Na}_2\text{SO}_4$ , filtered and concentrated. The residue was further purified by flash column chromatography to obtain the desired acetal.

**General Procedure B (ketone synthesis using Weinreb amide).** To a flame-dried round bottom flask were added aryl bromide and THF (0.2-0.25 M). The solution was cooled to  $-78$  °C and *n*-BuLi (in hexane or toluene, 1.1 equiv) was added dropwise. The reaction was kept at  $-78$  °C for 1-2 h and Weinreb amide (1.3-1.5 equiv) in THF was added dropwise. The reaction was then allowed to warm to room temperature overnight. Upon completion monitored by TLC, the reaction was quenched with saturated  $\text{NH}_4\text{Cl}$  aqueous solution and extracted with EtOAc ( $3 \times 10$  mL). The combined organic phases were washed with  $\text{H}_2\text{O}$  ( $1 \times 10$  mL) and brine ( $1 \times 10$  mL). The organic phase was dried over anhydrous  $\text{Na}_2\text{SO}_4$ , filtered and concentrated. The residue was further purified by flash column chromatography to obtain the desired ketone.

**General Procedure C (hydrazone synthesis by microwave reaction).** To a flame-dried microwave vial were added ketone and EtOH (0.2-0.33 M). The solution was sparged with Ar for 5 min, followed by the addition of  $\text{N}_2\text{H}_4$  (13 equiv) and HOAc (1.2 equiv). The vial was heated in a microwave reactor at  $160$  °C for 3 h. If the poor conversion was observed by TLC, to the reaction were added  $\text{N}_2\text{H}_4$  (13 equiv) and HOAc (1.2 equiv) again and the reaction was heated in the microwave reactor at  $160$  °C for another 3 h. Upon full conversion, the reaction was quenched with  $\text{H}_2\text{O}$  and extracted with ether ( $3 \times 10$  mL). The combined organic phases were further washed with brine ( $1 \times 10$  mL) and dried over anhydrous  $\text{Na}_2\text{SO}_4$ . After filtration and concentration, the residue was purified by flash column chromatography to obtain the desired hydrazone as *Z/E* mixture. *Hydrazones were often isolated as a mixture of E/Z isomers. As such*

<sup>1</sup>H NMR peaks have been reported only for selected examples. Due to restricted rotation, the hydrazone NMRs often indicated diastereotopic protons.

**General Procedure D ((Hetero) Diels-Alder reaction).** To a flame-dried vial were added hydrazone, dienophile (1.0-1.2 equiv), MnO<sub>2</sub> (8.0 equiv), Rh<sub>2</sub>(MesCO<sub>2</sub>)<sub>4</sub> or Rh<sub>2</sub>(*R*-PTAD)<sub>4</sub> (0.01 equiv) and DCM (0.017 M). After stirred at room temperature for 5-24 h, the crude reaction was filtered over celite to remove MnO<sub>2</sub>, concentrated and further purified by flash column chromatography to obtain the desired product.

**General Procedure E ((Hetero) Diels-Alder reaction).** To a flame-dried vial were added hydrazone, MnO<sub>2</sub> (8.0 equiv) and DCM (0.017 M). After stirred at room temperature for 2 h, dienophile (1.0-1.2 equiv), Rh<sub>2</sub>(MesCO<sub>2</sub>)<sub>4</sub> (0.01 equiv) were added. After stirred for another 3-22 h, the crude reaction was filtered over celite to remove MnO<sub>2</sub>, concentrated and further purified by flash column chromatography to obtain the desired product.

**General Procedure F ((Hetero) Diels-Alder reaction at 55 °C).** To a flame-dried vial were added hydrazone, MnO<sub>2</sub> (8.0 equiv) and THF (0.017 M). After stirred at room temperature for 1 h, dienophile (1.0-1.2 equiv), Rh<sub>2</sub>(MesCO<sub>2</sub>)<sub>4</sub> or Rh<sub>2</sub>(*S*-TCPTTL)<sub>4</sub> (0.01 equiv) were added, and the reaction was heated to 55 °C. After stirred for another 12-20 h, the crude reaction was cooled to room temperature and filtered over celite to remove MnO<sub>2</sub>, concentrated and further purified by flash column chromatography to obtain the desired product.

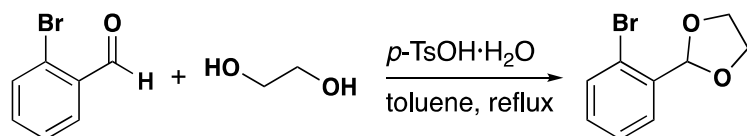

2-(2-Bromophenyl)-1,3-dioxolane was synthesized according to General Procedure E, using 2-bromobenzaldehyde (1.17 mL, 10 mmol), ethylene glycol (775.9 mg, 12.5 mmol), *p*-toluenesulfonic acid monohydrate (34.4 mg, 0.18 mmol) and toluene (20 mL). The crude product was purified by flash column chromatography (hexane/EtOAc = 30:1, v/v) to obtain the acetal as a colorless oil (2.16 g, 94%). <sup>1</sup>H NMR (400 MHz, CDCl<sub>3</sub>) δ 7.60 (d, *J* = 7.7 Hz, 1H), 7.57 (d, *J* = 8.0 Hz, 1H), 7.34 (t, *J* = 7.5 Hz, 1H), 7.22 (t, *J* = 7.4 Hz, 1H), 6.10 (s, 1H), 4.21 – 4.03 (m, 4H). <sup>1</sup>H NMR data was consistent with reported literature values.<sup>1</sup>

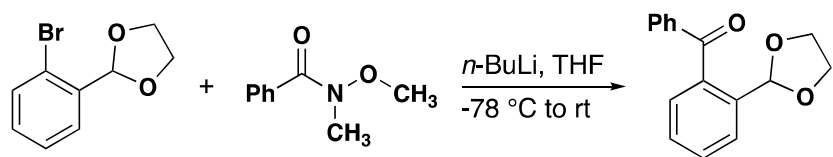

(2-(1,3-Dioxolan-2-yl)phenyl)(phenyl)methanone was synthesized according to General Procedure A, using 2-(2-Bromophenyl)-1,3-dioxolane (687.2 mg, 3 mmol), *n*-BuLi (1.8 M, 1.8 mL, 3.3 mmol), *N*-methoxy-*N*-methylbenzamide (743.4 mg, 4.5 mmol) and THF (20 mL). The crude product was purified by flash column chromatography (hexane/EtOAc = 10:1, v/v) to obtain the ketone as a colorless oil (454.2 mg, 60%). <sup>1</sup>H NMR (400 MHz, C<sub>6</sub>D<sub>6</sub>) δ 7.91 – 7.86 (m, 2H), 7.76 (dd, *J* = 7.8, 1.2 Hz, 1H), 7.15 – 7.06 (m, 3H), 7.04 – 6.94 (m, 3H), 6.24 (s, 1H), 3.44 – 3.34 (m, 2H), 3.28 – 3.19 (m, 2H). <sup>1</sup>H NMR data was consistent with reported literature values.<sup>2</sup>

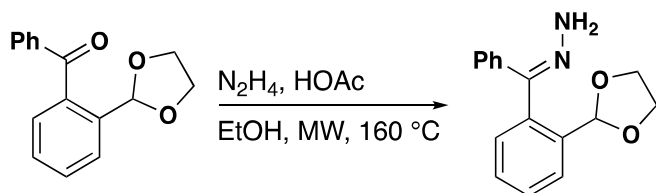

(*E*)-((2-(1,3-Dioxolan-2-yl)phenyl)(phenyl)methylene)hydrazine was synthesized according to General Procedure B, using (2-(1,3-dioxolan-2-yl)phenyl)(phenyl)methanone (254.3 mg, 1 mmol), N<sub>2</sub>H<sub>4</sub> (0.41 mL, 13 mmol), HOAc (0.07 mL, 1.2 mmol) and EtOH (4 mL). The crude product was purified by flash column chromatography (hexane/EtOAc = 2:1, v/v) to obtain the hydrazone as a pale yellow solid (195.2 mg, 73%). m.p. 131-133 °C. <sup>1</sup>H NMR (400 MHz, CDCl<sub>3</sub>) δ 7.81 – 7.73 (m, 1H), 7.59 – 7.48 (m, 2H), 7.49 – 7.41 (m, 2H), 7.32 – 7.22 (m, 3H), 7.19 – 7.11 (m, 1H), 5.59 (s, 1H), 5.39 (s, 2H), 4.12 – 3.97 (m, 2H), 3.95 – 3.83 (m, 2H). <sup>13</sup>C NMR (101 MHz, CDCl<sub>3</sub>) δ 148.2, 138.3, 136.5, 132.9, 130.7, 129.5, 129.1, 128.3, 128.2, 127.6, 126.1, 101.7, 65.6, 65.5. HRMS (ESI) *m/z* calcd for C<sub>16</sub>H<sub>17</sub>N<sub>2</sub>O<sub>2</sub><sup>+</sup> [M+H]<sup>+</sup> 269.1285, found 269.1283.

#### [4+2] Cycloaddition

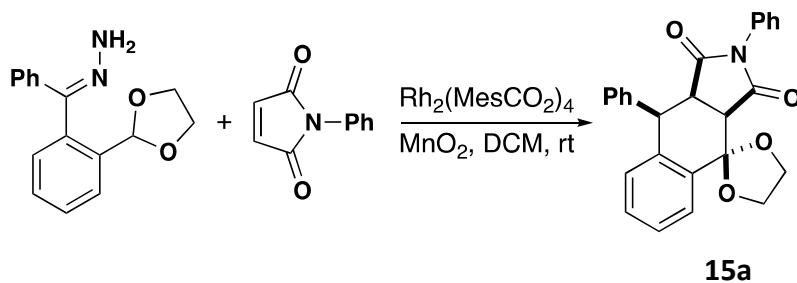

2,9-Diphenyl-9,9a-dihydrospiro[benzo[*f*]isoindole-4,2'-[1,3]dioxolane]-1,3(2*H*,3*aH*)-dione was synthesized according to General Procedure D, using (*E*)-((2-(1,3-dioxolan-2-yl)phenyl)(phenyl)methylene)hydrazine (26.8 mg, 0.1 mmol), 1-phenyl-1*H*-pyrrole-2,5-dione (20.8 mg, 0.12 mmol), MnO<sub>2</sub> (69.6 mg, 0.8 mmol), Rh<sub>2</sub>(MesCO<sub>2</sub>)<sub>4</sub> (0.9 mg, 0.001 mmol) and DCM (6 mL). The crude product was purified by flash column chromatography (hexane/EtOAc = 3:1, v/v) to obtain **15a** as a white solid (22.6 mg, 55%, 87:13 dr). m.p. 150-152 °C. <sup>1</sup>H NMR (400 MHz, CDCl<sub>3</sub>) δ 7.70 – 7.62 (m, 1H), 7.62 – 7.52 (m, 2H), 7.42 – 7.23 (m, 8H), 7.22 – 7.13 (m, 1H), 6.93 – 6.80 (m, 2H), 5.02 (d, *J* = 6.3 Hz, 1H), 4.36 (q, *J* = 6.3 Hz, 1H), 4.28 (q, *J* = 6.5 Hz, 1H), 4.21 (q, *J* = 6.4 Hz, 1H), 4.12 (q, *J* = 6.3 Hz, 1H), 3.86 (dd, *J* = 9.2, 6.3 Hz, 1H), 3.74 (d, *J* = 9.1 Hz, 1H). <sup>13</sup>C NMR (101 MHz, CDCl<sub>3</sub>) δ 175.4, 172.8, 138.4, 137.8, 135.7, 131.8, 131.0, 129.6, 129.1, 128.6, 128.2, 128.0, 127.4, 127.2, 126.5, 124.6, 105.1, 66.3, 65.1, 51.3, 45.0, 44.5. IR (neat): 2920, 1707, 1377, 1177, 1062, 730, 693 cm<sup>-1</sup>. HRMS (ESI) *m/z* calcd for C<sub>26</sub>H<sub>22</sub>NO<sub>4</sub><sup>+</sup> [M+H]<sup>+</sup> 412.1543, found 412.1554.

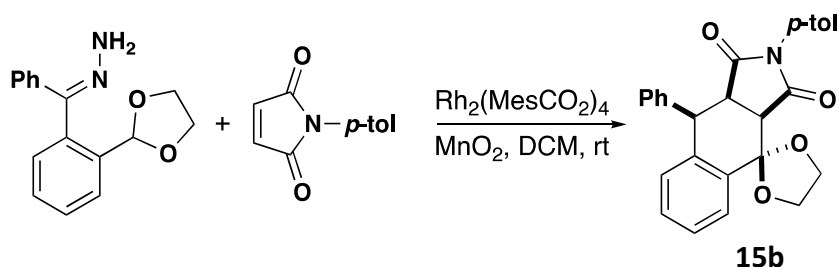

9-Phenyl-2-(*p*-tolyl)-9,9a-dihydrospiro[benzo[*f*]isoindole-4,2'-[1,3]dioxolane]-1,3(2*H*,3*aH*)-dione was synthesized according to General Procedure D, using (*E*)-((2-(1,3-dioxolan-2-yl)phenyl)(phenyl)methylene)hydrazine (26.8 mg, 0.1 mmol), 1-(*p*-tolyl)-1*H*-pyrrole-2,5-dione (22.5 mg, 0.12 mmol), MnO<sub>2</sub> (69.6 mg, 0.8 mmol), Rh<sub>2</sub>(MesCO<sub>2</sub>)<sub>4</sub> (0.9 mg, 0.001 mmol) and DCM (6 mL). The crude product was purified by flash column chromatography (hexane/EtOAc = 2:1, v/v) to obtain **15b** as a white solid (27.3 mg, 64%, 87:13 dr). m.p. 199-201 °C. <sup>1</sup>H NMR (400 MHz, CDCl<sub>3</sub>) δ 7.69 – 7.62 (m, 1H), 7.60 – 7.50 (m, 2H), 7.40 – 7.25 (m, 5H), 7.19 – 7.16 (m, 1H), 7.12 (d, *J* = 8.2 Hz, 2H), 6.73 (d, *J* = 8.3 Hz, 2H), 5.01 (d, *J* = 6.3 Hz, 1H), 4.42 – 4.33 (m, 1H), 4.33 – 4.26 (m, 1H), 4.25 – 4.18 (m, 1H), 4.17 – 4.07 (m, 1H), 3.86 (dd, *J* = 9.2, 6.4 Hz, 1H), 3.74 (d, *J* = 9.2 Hz, 1H), 2.30 (s, 3H). <sup>13</sup>C NMR (101 MHz, CDCl<sub>3</sub>) δ 175.6, 173.0, 138.7, 138.4, 137.9, 135.7, 131.0, 129.7, 129.6, 129.2, 128.2, 128.0, 127.4, 127.2, 126.3, 124.6, 105.1, 66.4, 65.1, 51.3, 45.0,

44.5, 21.3. IR (neat): 2902, 1705, 1382, 1179, 1067, 736, 696  $\text{cm}^{-1}$ . HRMS (ESI)  $m/z$  calcd for  $\text{C}_{27}\text{H}_{24}\text{NO}_4^+$   $[\text{M}+\text{H}]^+$  426.1700, found 426.1713.

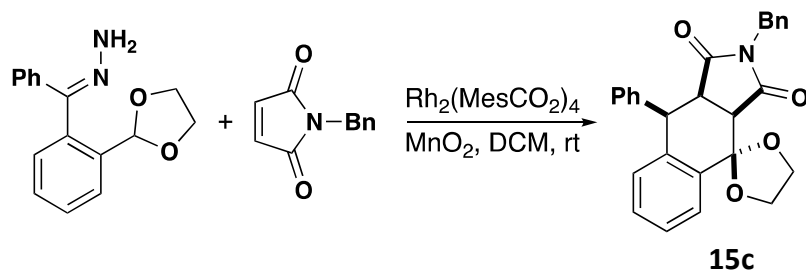

2-Benzyl-9-phenyl-9,9a-dihydrospiro[benzo[*f*]isoindole-4,2'-[1,3]dioxolane]-1,3(2*H*,3*aH*)-dione was synthesized according to General Procedure D, using (*E*)-((2-(1,3-dioxolan-2-yl)phenyl)(phenyl)methylene)hydrazine (26.8 mg, 0.1 mmol), 1-benzyl-1*H*-pyrrole-2,5-dione (22.5 mg, 0.12 mmol),  $\text{MnO}_2$  (69.6 mg, 0.8 mmol),  $\text{Rh}_2(\text{MesCO}_2)_4$  (0.9 mg, 0.001 mmol) and DCM (6 mL). The crude product was purified by flash column chromatography (hexane/EtOAc = 2:1, v/v) to obtain **15c** as a white solid (31.2 mg, 73%, 91:9 dr). m.p. 178-180 °C.  $^1\text{H}$  NMR (400 MHz,  $\text{CDCl}_3$ )  $\delta$  7.58 – 7.51 (m, 1H), 7.43 – 7.36 (m, 2H), 7.35 – 7.28 (m, 3H), 7.28 – 7.21 (m, 2H), 7.18 – 7.05 (m, 4H), 6.77 (d,  $J$  = 6.7 Hz, 2H), 4.99 (d,  $J$  = 6.3 Hz, 1H), 4.51 (d,  $J$  = 14.4 Hz, 1H), 4.43 (d,  $J$  = 14.4 Hz, 1H), 4.36 – 4.29 (m, 1H), 4.29 – 4.22 (m, 1H), 4.22 – 4.15 (m, 1H), 4.02 – 3.94 (m, 1H), 3.69 (dd,  $J$  = 8.7, 6.3 Hz, 1H), 3.59 (d,  $J$  = 8.8 Hz, 1H).  $^{13}\text{C}$  NMR (101 MHz,  $\text{CDCl}_3$ )  $\delta$  175.9, 173.3, 137.9, 137.0, 135.5, 131.3, 129.4, 128.5, 128.0, 127.8, 127.46, 127.46, 127.4, 127.0, 124.3, 105.4, 66.4, 64.6, 50.9, 44.6, 44.2, 42.1. IR (neat): 2923, 1701, 1287, 1180, 1016, 695  $\text{cm}^{-1}$ . HRMS (ESI)  $m/z$  calcd for  $\text{C}_{27}\text{H}_{24}\text{NO}_4^+$   $[\text{M}+\text{H}]^+$  426.1700, found 426.1707.

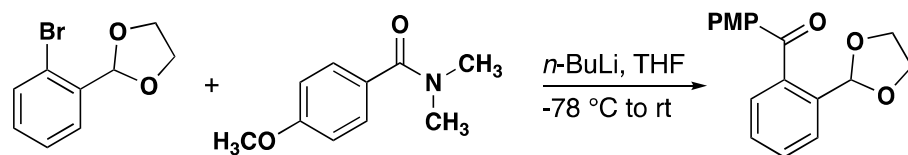

To a flame-dried round bottom flask were added 2-(2-bromophenyl)-1,3-dioxolane (755.9 mg, 3.3 mmol) and THF (20 mL). The solution was cooled to -78 °C and *n*-BuLi (2.5 M in hexane, 1.5 mL, 1.2 equiv) was added dropwise. The reaction was kept at -78 °C for 15 min and 4-methoxy-*N,N*-dimethylbenzamide (585.7 mg, 3 mmol) in THF (10 mL) was then added dropwise. The reaction was allowed to warm to room temperature and stirred overnight. Upon completion monitored by TLC, the reaction was quenched with saturated  $\text{NH}_4\text{Cl}$  aqueous solution and extracted with EtOAc (3  $\times$  10 mL). The combined organic phases were washed with  $\text{H}_2\text{O}$  (1  $\times$  10

mL) and brine (1 × 10 mL). The organic phase was dried over anhydrous Na<sub>2</sub>SO<sub>4</sub>, filtered and concentrated. The residue was further purified by flash column chromatography (hexane/EtOAc = 3:1, v/v) to obtain the ketone as a clear oil (228.3 mg, 27%). <sup>1</sup>H NMR (400 MHz, CDCl<sub>3</sub>) δ 7.79 (d, *J* = 8.9 Hz, 2H), 7.69 (dd, *J* = 7.8, 1.3 Hz, 1H), 7.50 (td, *J* = 7.6, 1.4 Hz, 1H), 7.41 (td, *J* = 7.5, 1.3 Hz, 1H), 7.31 (dd, *J* = 7.6, 1.5 Hz, 1H), 6.92 (d, *J* = 8.9 Hz, 2H), 5.99 (s, 1H), 3.95 – 3.91 (m, 2H), 3.91 – 3.88 (m, 2H), 3.87 (s, 3H). <sup>13</sup>C NMR (101 MHz, CDCl<sub>3</sub>) δ 196.4, 163.8, 139.1, 136.7, 132.6, 130.8, 129.8, 128.5, 128.0, 127.1, 113.7, 101.6, 65.3, 55.6. IR (neat): 2898, 1711, 1511, 1377, 1179, 1065, 1027, 736 cm<sup>-1</sup>. HRMS (ESI) *m/z* calcd for C<sub>17</sub>H<sub>17</sub>O<sub>4</sub><sup>+</sup> [M+H]<sup>+</sup> 285.1121, found 285.1126.

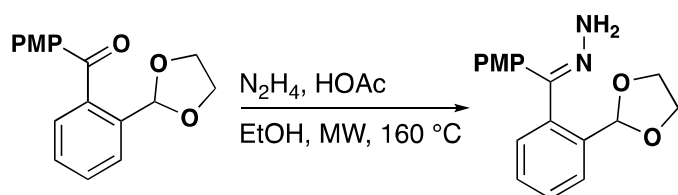

(*E*)-((2-(1,3-Dioxolan-2-yl)phenyl)(4-methoxyphenyl)methylene)hydrazine was synthesized according to General Procedure B, using (2-(1,3-dioxolan-2-yl)phenyl)(4-methoxyphenyl)methanone (200 mg, 0.7 mmol), N<sub>2</sub>H<sub>4</sub> (0.29 mL, 9.1 mmol), HOAc (0.05 mL, 0.84 mmol) and EtOH (3 mL). The crude product was purified by flash column chromatography (hexane/EtOAc = 2:1, v/v) to obtain the hydrazone as a pale yellow solid (139.9 mg, 67%). m.p. 80-81 °C. <sup>1</sup>H NMR (400 MHz, CDCl<sub>3</sub>) δ 7.79 – 7.72 (m, 1H), 7.56 – 7.48 (m, 2H), 7.39 (d, *J* = 8.9 Hz, 2H), 7.19 – 7.11 (m, 1H), 6.81 (d, *J* = 8.9 Hz, 2H), 5.59 (s, 1H), 5.28 (s, 2H), 4.11 – 3.99 (m, 2H), 3.95 – 3.85 (m, 2H), 3.78 (s, 3H). <sup>13</sup>C NMR (101 MHz, CDCl<sub>3</sub>) δ 159.9, 148.5, 136.4, 133.2, 131.2, 130.7, 129.4, 129.0, 127.6, 113.7, 101.8, 65.7, 65.6, 55.4. HRMS (ESI) *m/z* calcd for C<sub>17</sub>H<sub>19</sub>N<sub>2</sub>O<sub>3</sub><sup>+</sup> [M+H]<sup>+</sup> 299.1390, found 299.1391.

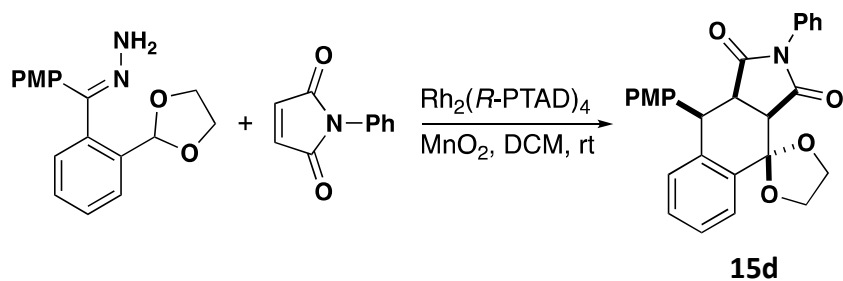

(3*aR*,9*R*,9*aR*)-9-(4-Methoxyphenyl)-2-phenyl-9,9*a*-dihydrospiro[benzo[*f*]isoindole-4,2'-[1,3]dioxolane]-1,3(2*H*,3*aH*)-dione was synthesized according to General Procedure D, using (*E*-



((2-(1,3-dioxolan-2-yl)phenyl)(4-methoxyphenyl)methylene)hydrazine (29.8 mg, 0.1 mmol), 1-phenyl-1*H*-pyrrole-2,5-dione (20.8 mg, 0.12 mmol), MnO<sub>2</sub> (69.6 mg, 0.8 mmol), Rh<sub>2</sub>(*R*-PTAD)<sub>4</sub> (1.6 mg, 0.001 mmol) and DCM (6 mL). The crude product was purified by flash column chromatography (hexane/EtOAc = 2:1, v/v) to obtain **15d** as a white solid (27.0 mg, 61%, >95:5 dr). m.p. 113-114 °C. <sup>1</sup>H NMR (400 MHz, CDCl<sub>3</sub>) δ 7.68 – 7.62 (m, 1H), 7.48 (d, *J* = 8.8 Hz, 2H), 7.37 – 7.27 (m, 5H), 7.20 – 7.14 (m, 1H), 6.92 – 6.83 (m, 4H), 4.97 (d, *J* = 6.3 Hz, 1H), 4.37 (q, *J* = 6.2 Hz, 1H), 4.29 (q, *J* = 6.4 Hz, 1H), 4.22 (q, *J* = 6.4 Hz, 1H), 4.16 – 4.09 (m, 1H), 3.86 – 3.78 (m, 4H), 3.74 (d, *J* = 9.2 Hz, 1H). <sup>13</sup>C NMR (101 MHz, CDCl<sub>3</sub>) δ 175.6, 172.9, 158.9, 138.6, 135.7, 132.2, 131.8, 129.8, 129.6, 129.1, 128.6, 128.0, 127.2, 126.5, 124.6, 113.5, 105.1, 66.4, 65.1, 55.4, 51.3, 45.2, 43.8. HRMS (ESI) *m/z* calcd for C<sub>27</sub>H<sub>24</sub>NO<sub>5</sub><sup>+</sup> [M+H]<sup>+</sup> 442.1649, found 442.1654.

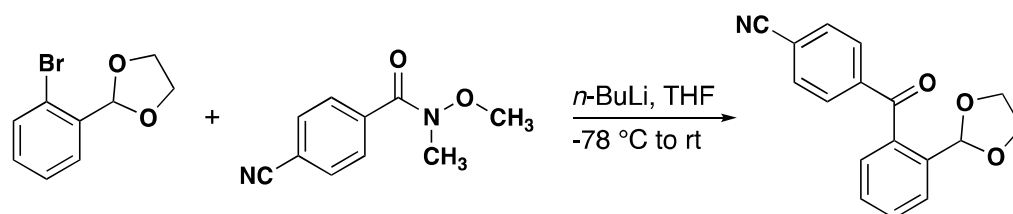

4-(2-(1,3-Dioxolan-2-yl)benzoyl)benzonitrile was synthesized according to General Procedure A, using 2-(2-Bromophenyl)-1,3-dioxolane (229.1 mg, 1 mmol), *n*-BuLi (2.16 M, 0.51 mL, 1.1 mmol), 4-cyano-*N*-methoxy-*N*-methylbenzamide (285.3 mg, 1.5 mmol) and THF (6 mL). The crude product was purified by flash column chromatography (hexane/EtOAc = 5:1, v/v) to obtain the ketone as a white solid (141.0 mg, 51%). m.p. 104-106 °C. <sup>1</sup>H NMR (400 MHz, CDCl<sub>3</sub>) δ 7.88 (d, *J* = 8.4 Hz, 2H), 7.74 (d, *J* = 8.4 Hz, 2H), 7.70 (d, *J* = 7.8 Hz, 1H), 7.56 (td, *J* = 7.6, 1.4 Hz, 1H), 7.46 (td, *J* = 7.5, 1.3 Hz, 1H), 7.29 (dd, *J* = 7.6, 1.3 Hz, 1H), 6.00 (s, 1H), 3.90 – 3.79 (m, 4H). <sup>13</sup>C NMR (101 MHz, CDCl<sub>3</sub>) δ 196.2, 141.0, 137.3, 137.2, 132.3, 130.7, 130.3, 128.8, 128.0, 127.5, 118.2, 116.3, 101.7, 65.2. HRMS (ESI) *m/z* calcd for C<sub>17</sub>H<sub>14</sub>NO<sub>3</sub><sup>+</sup> [M+H]<sup>+</sup> 280.0968, found 280.0975.

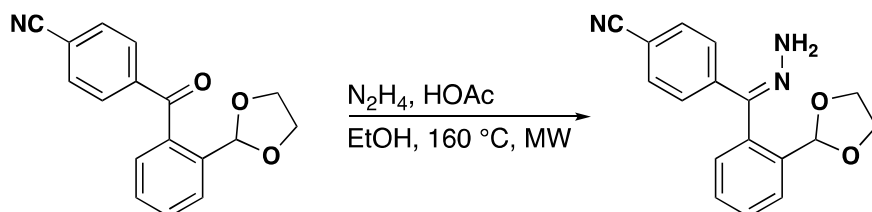

(*E*)-4-((2-(1,3-dioxolan-2-yl)phenyl)(hydrazineylidene)methyl)benzonitrile was synthesized according to General Procedure B, using 4-(2-(1,3-dioxolan-2-yl)benzoyl)benzonitrile (83.8 mg,

0.3 mmol),  $\text{N}_2\text{H}_4$  (0.12 mL, 3.9 mmol), HOAc (0.02 mL, 0.36 mmol) and EtOH (2 mL). The crude product was purified by flash column chromatography (hexane/EtOAc = 2:1, v/v) to obtain the hydrazone as a yellow oil (34.0 mg, 39%).  $^1\text{H}$  NMR (400 MHz,  $\text{CDCl}_3$ )  $\delta$  7.79 – 7.74 (m, 1H), 7.60 – 7.49 (m, 6H), 7.17 – 7.09 (m, 1H), 5.91 – 5.14 (m, 3H), 4.08 – 3.84 (m, 4H).  $^{13}\text{C}$  NMR (101 MHz,  $\text{CDCl}_3$ )  $\delta$  145.6, 142.7, 136.8, 132.1, 131.6, 131.1, 130.0, 129.3, 128.1, 126.4, 119.3, 111.1, 102.0, 65.62, 65.59. HRMS (ESI)  $m/z$  calcd for  $\text{C}_{17}\text{H}_{16}\text{N}_3\text{O}_2^+$   $[\text{M}+\text{H}]^+$  294.1237, found 294.1245.

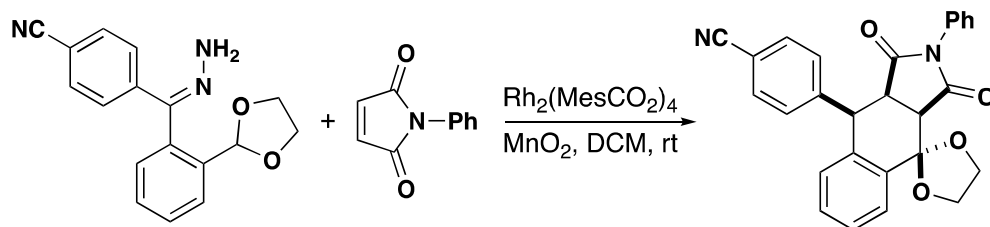

**15e**

4-((3*aR*,9*R*,9*aR*)-1,3-Dioxo-2-phenyl-1,2,3,3*a*,9,9*a*-hexahydrospiro[benzo[*f*]isoindole-4,2'-[1,3]dioxolan]-9-yl)benzonitrile was synthesized according to General Procedure D, using (*E*)-4-((2-(1,3-dioxolan-2-yl)phenyl)(hydrazineylidene)methyl)benzonitrile (29.3 mg, 0.1 mmol), 1-phenyl-1*H*-pyrrole-2,5-dione (20.8 mg, 0.12 mmol),  $\text{MnO}_2$  (69.6 mg, 0.8 mmol),  $\text{Rh}_2(\text{MesCO}_2)_4$  (0.9 mg, 0.001 mmol) and DCM (6 mL). The crude product was purified by flash column chromatography (hexane/EtOAc = 1:1, v/v) to obtain **15e** as a white solid (34.3 mg, 79%, 86:14 dr). m.p. 110-111 °C.  $^1\text{H}$  NMR (400 MHz,  $\text{CDCl}_3$ )  $\delta$  7.71 (d,  $J$  = 8.4 Hz, 2H), 7.69 – 7.65 (m, 1H), 7.62 (d,  $J$  = 8.4 Hz, 2H), 7.39 – 7.28 (m, 5H), 7.11 – 7.04 (m, 1H), 6.93 – 6.82 (m, 2H), 5.09 (d,  $J$  = 6.5 Hz, 1H), 4.39 – 4.28 (m, 2H), 4.24 – 4.12 (m, 2H), 3.92 (dd,  $J$  = 9.4, 6.6 Hz, 1H), 3.77 (d,  $J$  = 9.4 Hz, 1H).  $^{13}\text{C}$  NMR (101 MHz,  $\text{CDCl}_3$ )  $\delta$  175.2, 172.5, 143.8, 137.1, 135.8, 131.84, 131.81, 131.6, 129.9, 129.2, 128.9, 127.8, 127.7, 126.4, 124.8, 119.0, 111.2, 105.2, 66.3, 65.4, 51.0, 44.3, 44.2. IR (neat): 2974, 2226, 1716, 1383, 1067, 761  $\text{cm}^{-1}$ . HRMS (ESI)  $m/z$  calcd for  $\text{C}_{27}\text{H}_{21}\text{N}_2\text{O}_4^+$   $[\text{M}+\text{H}]^+$  437.1496, found 437.1507.

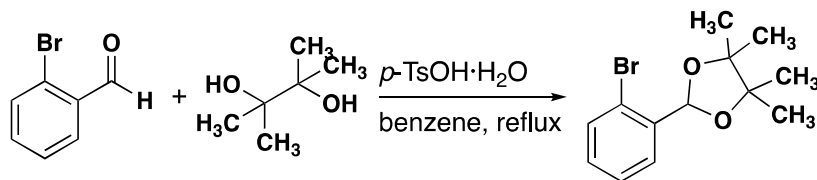

2-(2-Bromophenyl)-4,4,5,5-tetramethyl-1,3-dioxolane was synthesized according to General Procedure C, using 2-bromobenzaldehyde (1.17 mL, 10 mmol), pinacol (4.7 g, 40 mmol), *p*-

toluenesulfonic acid monohydrate (344.4 mg, 1.8 mmol) and benzene (30 mL). Upon full conversion determined by  $^1\text{H}$  NMR, the crude product was purified by flash column chromatography (hexane/EtOAc = 30:1, v/v) to obtain the acetal as a pale yellow solid.  $^1\text{H}$  NMR (400 MHz,  $\text{CDCl}_3$ )  $\delta$  7.69 (d,  $J$  = 7.8 Hz, 1H), 7.53 (d,  $J$  = 7.9 Hz, 1H), 7.32 (t,  $J$  = 7.5 Hz, 1H), 7.18 (t,  $J$  = 7.7 Hz, 1H), 6.20 (s, 1H), 1.35 (s, 6H), 1.29 (s, 6H).  $^1\text{H}$  NMR data was consistent with reported literature values.<sup>3</sup>

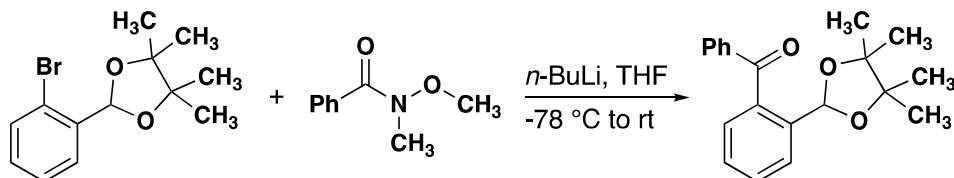

Phenyl(2-(4,4,5,5-tetramethyl-1,3-dioxolan-2-yl)phenyl)methanone was synthesized according to General Procedure A, using 2-(2-bromophenyl)-4,4,5,5-tetramethyl-1,3-dioxolane (855.5 mg, 3 mmol), *n*-BuLi (1.8 M, 1.8 mL, 3.3 mmol), *N*-methoxy-*N*-methylbenzamide (743.4 mg, 4.5 mmol) and THF (20 mL). The crude product was purified by flash column chromatography (hexane/EtOAc = 15:1, v/v) to obtain the ketone as a colorless oil (296.9 mg, 32%).  $^1\text{H}$  NMR (400 MHz,  $\text{CDCl}_3$ )  $\delta$  7.79 (d,  $J$  = 7.8 Hz, 3H), 7.56 (t,  $J$  = 7.5 Hz, 1H), 7.50 (t,  $J$  = 7.6 Hz, 1H), 7.43 (t,  $J$  = 7.5 Hz, 2H), 7.37 (t,  $J$  = 7.4 Hz, 1H), 7.30 (d,  $J$  = 7.6 Hz, 1H), 6.11 (s, 1H), 1.15 (s, 6H), 1.11 (s, 6H).  $^{13}\text{C}$  NMR (101 MHz,  $\text{CDCl}_3$ )  $\delta$  198.2, 139.6, 138.4, 138.2, 133.0, 130.3, 130.1, 128.3, 128.2, 127.7, 126.5, 97.1, 82.8, 24.1, 22.3. HRMS (ESI)  $m/z$  calcd for  $\text{C}_{20}\text{H}_{23}\text{O}_3^+$   $[\text{M}+\text{H}]^+$  311.1642, found 311.1646.

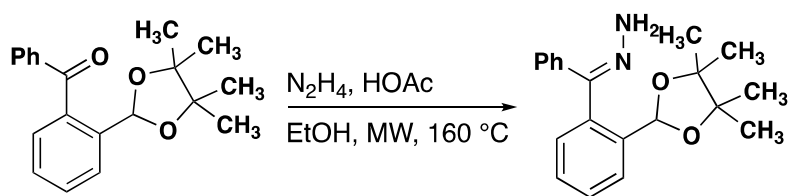

(*E*)-(Phenyl(2-(4,4,5,5-tetramethyl-1,3-dioxolan-2-yl)phenyl)methylene)hydrazine was synthesized according to General Procedure B, using phenyl(2-(4,4,5,5-tetramethyl-1,3-dioxolan-2-yl)phenyl)methanone (290 mg, 0.93 mmol),  $\text{N}_2\text{H}_4$  (0.38 mL, 12.1 mmol), HOAc (0.06 mL, 1.12 mmol) and EtOH (2.8 mL). The crude product was purified by flash column chromatography (hexane/EtOAc = 5:1, v/v) to obtain the hydrazone as a pale yellow solid (234.4 mg, 78%). m.p. 88-90 °C.  $^1\text{H}$  NMR (400 MHz,  $\text{CDCl}_3$ )  $\delta$  7.91 – 7.86 (m, 1H), 7.56 – 7.49 (m,

2H), 7.49 – 7.43 (m, 2H), 7.33 – 7.26 (m, 3H), 7.18 – 7.13 (m, 1H), 5.76 (s, 1H), 5.44 (s, 2H), 1.29 (s, 3H), 1.25 (s, 3H), 1.21 (s, 3H), 1.17 (s, 3H). <sup>13</sup>C NMR (101 MHz, CDCl<sub>3</sub>) δ 148.8, 138.5, 138.1, 133.1, 130.1, 129.4, 129.0, 128.2, 128.1, 126.9, 126.4, 97.5, 82.9, 82.8, 24.7, 24.6, 22.4, 22.3. HRMS (ESI) *m/z* calcd for C<sub>20</sub>H<sub>25</sub>N<sub>2</sub>O<sub>2</sub><sup>+</sup> [M+H]<sup>+</sup> 325.1911, found 325.1917.

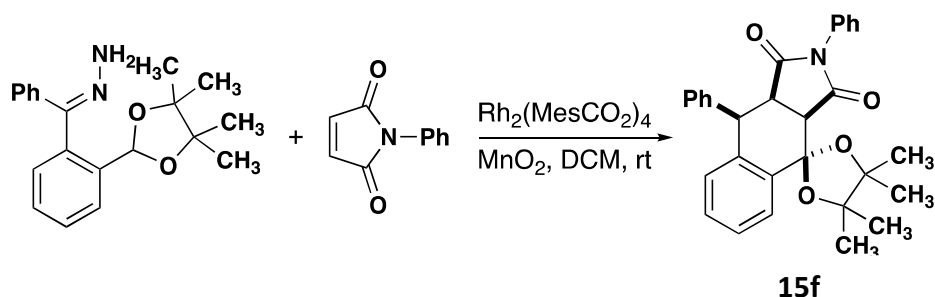

4',4',5',5'-Tetramethyl-2,9-diphenyl-9,9a-dihydrospiro[benzo[*f*]isoindole-4,2'-[1,3]dioxolane]-1,3(2*H*,3*aH*)-dione was synthesized according to General Procedure D, using (*E*)-(phenyl(2-(4,4,5,5-tetramethyl-1,3-dioxolan-2-yl)phenyl)methylene)hydrazine (32.4 mg, 0.1 mmol), 1-phenyl-1*H*-pyrrole-2,5-dione (20.8 mg, 0.12 mmol), MnO<sub>2</sub> (69.6 mg, 0.8 mmol), Rh<sub>2</sub>(MesCO<sub>2</sub>)<sub>4</sub> (0.9 mg, 0.001 mmol) and DCM (6 mL). The crude product was purified by flash column chromatography (hexane/EtOAc = 5:1, v/v) to obtain **15f** as a white solid (29.8 mg, 64%, >95:5 dr). m.p. 202-204 °C. <sup>1</sup>H NMR (400 MHz, CDCl<sub>3</sub>) δ 7.79 – 7.72 (m, 1H), 7.68 (d, *J* = 7.3 Hz, 2H), 7.42 (t, *J* = 7.5 Hz, 2H), 7.38 – 7.31 (m, 1H), 7.30 – 7.21 (m, 5H), 7.12 – 7.05 (m, 1H), 6.77 (d, *J* = 6.4 Hz, 2H), 5.23 (d, *J* = 4.3 Hz, 1H), 3.86 (dd, *J* = 8.1, 4.4 Hz, 1H), 3.78 (d, *J* = 8.2 Hz, 1H), 1.57 (s, 3H), 1.45 (s, 3H), 1.33 (s, 3H), 1.06 (s, 3H). <sup>13</sup>C NMR (101 MHz, CDCl<sub>3</sub>) δ 175.6, 172.4, 138.8, 137.9, 137.0, 131.9, 131.2, 128.9, 128.8, 128.4, 128.1, 127.3, 126.6, 126.5, 126.2, 124.6, 103.1, 84.7, 84.0, 55.0, 45.3, 44.0, 25.5, 24.7, 23.7, 23.6. IR (neat): 2975, 1712, 1377, 1119, 1062, 707, 692 cm<sup>-1</sup>. HRMS (ESI) *m/z* calcd for C<sub>30</sub>H<sub>30</sub>NO<sub>4</sub><sup>+</sup> [M+H]<sup>+</sup> 468.2169, found 468.2170.

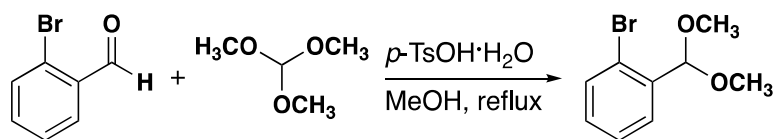

To a flame-dried round bottom flask were added 2-bromobenzaldehyde (2.33 mL, 20 mmol), trimethoxymethane (5.5 mL, 50 mmol), *p*-toluenesulfonic acid monohydrate (380.4 mg, 2 mmol) and methanol (40 mL). The reaction was stirred under reflux overnight. After half conversion was observed, another 4 mL of trimethoxymethane was added. The reaction was stirred for

another 1 d. Upon full conversion determined by  $^1\text{H}$  NMR, the reaction was quenched with saturated  $\text{NaHCO}_3$  aqueous solution. Most of methanol solvent was removed under reduced pressure as well as trimethoxymethane. The mixture was then extracted with EtOAc ( $3 \times 20$  mL). The combined organic phases were washed with  $\text{H}_2\text{O}$  ( $1 \times 10$  mL) and brine ( $1 \times 10$  mL). The organic phase was dried over anhydrous  $\text{Na}_2\text{SO}_4$ , filtered and concentrated. The residue was further purified by flash column chromatography (hexane/EtOAc = 30:1, v/v) to obtain 1-bromo-2-(dimethoxymethyl)benzene as a colorless oil.  $^1\text{H}$  NMR (400 MHz,  $\text{CDCl}_3$ )  $\delta$  7.61 (dd,  $J$  = 7.7, 1.8 Hz, 1H), 7.56 (dd,  $J$  = 8.0, 1.2 Hz, 1H), 7.33 (td,  $J$  = 7.5, 1.3 Hz, 1H), 7.20 (td,  $J$  = 7.7, 1.8 Hz, 1H), 5.56 (s, 1H), 3.39 (s, 6H).  $^1\text{H}$  NMR data was consistent with reported literature values.<sup>4</sup>

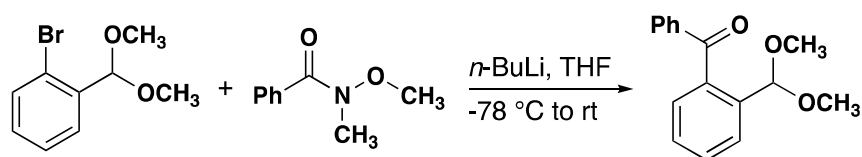

(2-(Dimethoxymethyl)phenyl)(phenyl)methanone was synthesized according to General Procedure A, using 1-bromo-2-(dimethoxymethyl)benzene (2.31 g, 10 mmol),  $n\text{-BuLi}$  (1.8 M, 6.1 mL, 11 mmol),  $N\text{-methoxy-}N\text{-methylbenzamide}$  (2.15 g, 13 mmol) and THF (60 mL). The crude product was purified by flash column chromatography (hexane/EtOAc = 10:1, v/v) to obtain the ketone as a pale yellow oil (1.50 g, 58%).  $^1\text{H}$  NMR (400 MHz, Acetone)  $\delta$  7.75 (dd,  $J$  = 8.4, 1.4 Hz, 2H), 7.69 (d,  $J$  = 7.4 Hz, 1H), 7.66 – 7.61 (m, 1H), 7.58 – 7.45 (m, 4H), 7.33 (dd,  $J$  = 7.4, 1.4 Hz, 1H), 5.53 (s, 1H), 3.13 (s, 6H).  $^{13}\text{C}$  NMR (101 MHz, Acetone)  $\delta$  197.5, 139.7, 138.5, 138.0, 133.8, 130.3, 129.3, 128.7, 128.6, 127.7, 101.5, 53.3. HRMS (TOF MS  $\text{Cl}^+$ )  $m/z$  calcd for  $\text{C}_{16}\text{H}_{16}\text{O}_3^+$  [ $\text{M}^+$ ] 256.1100, found 256.1105.

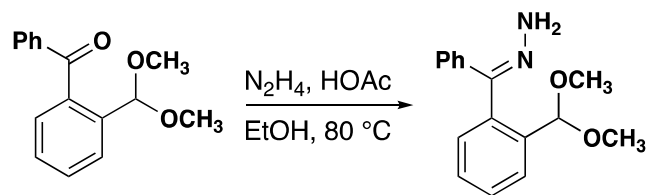

(*E*)-((2-(Dimethoxymethyl)phenyl)(phenyl)methylene)hydrazine was synthesized according to General Procedure B, using (2-(dimethoxymethyl)phenyl)(phenyl)methanone (768.9 mg, 3 mmol),  $\text{N}_2\text{H}_4$  (1.23 mL, 39 mmol), HOAc (0.2 mL, 3.6 mmol) and EtOH (9 mL). The crude product was purified by flash column chromatography (hexane/EtOAc = 5:1, v/v) to obtain the hydrazone as a yellow solid (627.3 mg, 77%). m.p. 77-79 °C.  $^1\text{H}$  NMR (599 MHz,  $\text{CDCl}_3$ )  $\delta$  7.80 –

7.75 (m, 1H), 7.55 – 7.48 (m, 2H), 7.48 – 7.42 (m, 2H), 7.31 – 7.24 (m, 3H), 7.20 – 7.15 (m, 1H), 5.40 (s, 2H), 5.04 (s, 1H), 3.38 (s, 3H), 3.12 (s, 3H). <sup>13</sup>C NMR (101 MHz, CDCl<sub>3</sub>) δ 148.0, 138.2, 137.6, 132.3, 129.9, 129.3, 129.0, 128.3, 128.2, 126.9, 126.1, 102.8, 55.0, 54.5. HRMS (ESI) *m/z* calcd for C<sub>16</sub>H<sub>19</sub>N<sub>2</sub>O<sub>2</sub><sup>+</sup> [M+H]<sup>+</sup> 271.1441, found 271.1444.

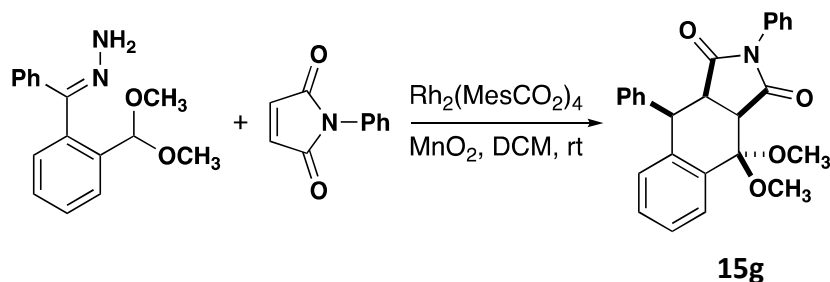

4,4-Dimethoxy-2,9-diphenyl-3a,4,9,9a-tetrahydro-1H-benzo[f]isoindole-1,3(2H)-dione was synthesized according to General Procedure D, using (*E*)-((2-(dimethoxymethyl)phenyl)(phenyl)methylene)hydrazine (27.0 mg, 0.1 mmol), 1-phenyl-1H-pyrrole-2,5-dione (20.8 mg, 0.12 mmol), MnO<sub>2</sub> (69.6 mg, 0.8 mmol), Rh<sub>2</sub>(MesCO<sub>2</sub>)<sub>4</sub> (0.9 mg, 0.001 mmol) and DCM (6 mL). The crude product was purified by flash column chromatography (hexane/EtOAc = 2:1, v/v) to obtain **15g** as a white solid (34.5 mg, 84%, >95:5 dr). m.p. 169–171 °C. <sup>1</sup>H NMR (400 MHz, CDCl<sub>3</sub>) δ 7.63 – 7.54 (m, 3H), 7.47 (dd, *J* = 7.7, 1.5 Hz, 1H), 7.41 – 7.23 (m, 8H), 7.10 – 6.99 (m, 2H), 5.06 (d, *J* = 6.2 Hz, 1H), 3.88 (d, *J* = 9.0 Hz, 1H), 3.79 (dd, *J* = 9.0, 6.2 Hz, 1H), 3.54 (s, 3H), 3.05 (s, 3H). <sup>13</sup>C NMR (101 MHz, CDCl<sub>3</sub>) δ 174.1, 173.7, 139.7, 136.9, 135.3, 132.0, 129.2, 129.1, 129.0, 128.48, 128.42, 128.38, 127.7, 127.5, 127.2, 126.6, 81.1, 75.6, 57.4, 51.3, 50.0, 44.2. IR (neat): 2922, 1711, 1375, 1153, 1052, 741, 694 cm<sup>-1</sup>. HRMS (ESI) *m/z* calcd for C<sub>26</sub>H<sub>24</sub>NO<sub>4</sub><sup>+</sup> [M+H]<sup>+</sup> 414.1700, found 414.1706.

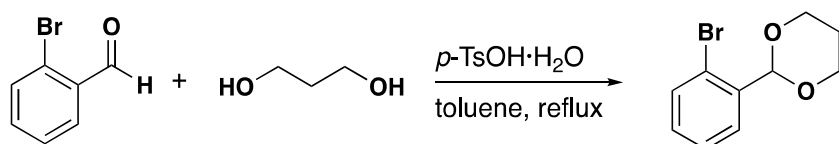

2-(2-Bromophenyl)-1,3-dioxane was synthesized according to General Procedure C, using 2-bromobenzaldehyde (925.1 mg, 5 mmol), propane-1,3-diol (418.5 mg, 5.5 mmol), *p*-toluenesulfonic acid monohydrate (95.1 mg, 0.5 mmol) and toluene (10 mL). The crude product was purified by flash column chromatography (hexane/EtOAc = 30:1, v/v) to obtain the acetal as a white solid. <sup>1</sup>H NMR (400 MHz, CDCl<sub>3</sub>) δ 7.69 (dd, *J* = 7.8, 1.8 Hz, 1H), 7.53 (dd, *J* = 8.0, 1.2 Hz, 1H), 7.34 (td, *J* = 7.6, 1.2 Hz, 1H), 7.19 (td, *J* = 7.7, 1.8 Hz, 1H), 5.76 (s, 1H), 4.28 (dd, *J* = 5.0,

1.3 Hz, 1H), 4.25 (dd,  $J = 5.1, 1.4$  Hz, 1H), 4.03 (td,  $J = 12.4, 2.6$  Hz, 2H), 2.35 – 2.14 (m, 1H), 1.50 – 1.40 (m, 1H).  $^1\text{H}$  NMR data was consistent with reported literature values.<sup>5</sup>

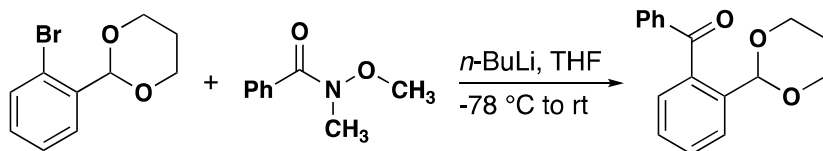

(2-(1,3-Dioxan-2-yl)phenyl)(phenyl)methanone was synthesized according to General Procedure A, using 2-(2-bromophenyl)-1,3-dioxane (729.3 mg, 3 mmol), *n*-BuLi (2.5 M, 1.3 mL, 3.3 mmol), *N*-methoxy-*N*-methylbenzamide (743.4 mg, 4.5 mmol) and THF (18 mL). The crude product was purified by flash column chromatography (hexane/EtOAc = 10:1, v/v) to obtain the ketone as a white solid (427.9 mg, 53%). m.p. 76-77 °C.  $^1\text{H}$  NMR (400 MHz,  $\text{C}_6\text{D}_6$ )  $\delta$  8.04 (d,  $J = 7.9$  Hz, 1H), 7.94 – 7.86 (m, 2H), 7.24 – 7.16 (m, 1H), 7.14 – 7.01 (m, 4H), 7.00 – 6.92 (m, 1H), 5.94 (s, 1H), 3.74 – 3.62 (m, 2H), 3.32 (td,  $J = 12.2, 2.4$  Hz, 2H), 1.79 – 1.61 (m, 1H), 0.56 – 0.43 (m, 1H).  $^{13}\text{C}$  NMR (101 MHz,  $\text{C}_6\text{D}_6$ )  $\delta$  197.2, 138.8, 138.7, 138.4, 132.60, 132.58, 130.4, 129.8, 128.4, 128.2, 126.5, 98.9, 67.1, 25.8. HRMS (ESI)  $m/z$  calcd for  $\text{C}_{17}\text{H}_{17}\text{O}_3^+$  [M+H]<sup>+</sup> 269.1172, found 269.1175.

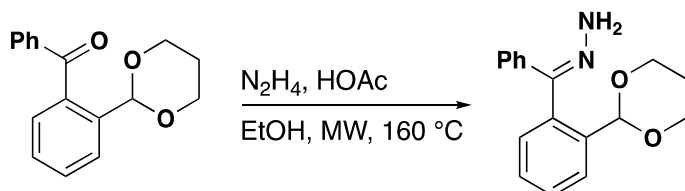

(*E*)-((2-(1,3-Dioxan-2-yl)phenyl)(phenyl)methylene)hydrazine was synthesized according to General Procedure C, using (2-(1,3-dioxan-2-yl)phenyl)(phenyl)methanone (268.3 mg, 1 mmol),  $\text{N}_2\text{H}_4$  (0.41 mL, 13 mmol), HOAc (0.07 mL, 1.2 mmol) and EtOH (3 mL). The crude product was purified by flash column chromatography (hexane/EtOAc = 3:1, v/v) to obtain the hydrazone as a pale yellow solid (226.8 mg, 80%). m.p. 106-108 °C.  $^1\text{H}$  NMR (400 MHz,  $\text{CDCl}_3$ )  $\delta$  7.90 – 7.83 (m, 1H), 7.57 – 7.48 (m, 2H), 7.48 – 7.41 (m, 2H), 7.33 – 7.24 (m, 3H), 7.18 – 7.11 (m, 1H), 6.03 – 4.48 (m, 3H), 4.20 – 4.03 (m, 2H), 3.89 – 3.79 (m, 1H), 3.70 (td,  $J = 12.0, 2.6$  Hz, 1H), 2.24 – 2.09 (m, 1H), 1.39 – 1.29 (m, 1H).  $^{13}\text{C}$  NMR (101 MHz,  $\text{CDCl}_3$ )  $\delta$  148.4, 138.4, 137.4, 131.9, 130.3, 129.6, 128.9, 128.3, 128.2, 127.0, 126.3, 99.8, 67.6, 67.5, 25.8. HRMS (ESI)  $m/z$  calcd for  $\text{C}_{17}\text{H}_{19}\text{N}_2\text{O}_2^+$  [M+H]<sup>+</sup> 283.1441, found 283.1442.

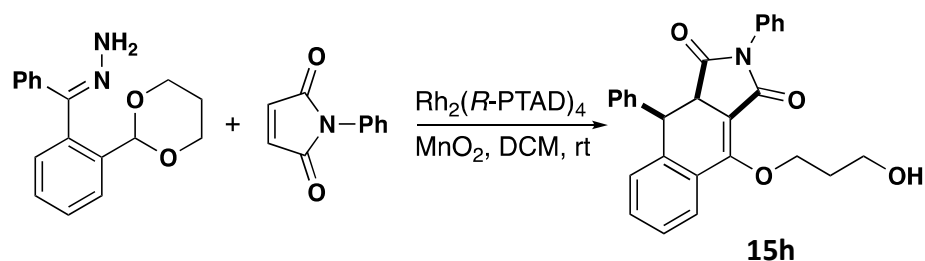

(3*aR*,4*R*)-9-(3-Hydroxypropoxy)-2,4-diphenyl-3*a*,4-dihydro-1*H*-benzo[*f*]isoindole-1,3(2*H*)-dione was synthesized according to General Procedure G, using (*E*)-((2-(1,3-dioxan-2-yl)phenyl)(phenyl)methylene)hydrazine (28.2 mg, 0.1 mmol), 1-phenyl-1*H*-pyrrole-2,5-dione (20.8 mg, 0.12 mmol), MnO<sub>2</sub> (69.6 mg, 0.8 mmol), Rh<sub>2</sub>(*R*-PTAD)<sub>4</sub> (1.6 mg, 0.001 mmol) and DCM (6 mL). The crude product was purified by flash column chromatography (hexane/EtOAc = 2:1, v/v) to obtain **15h** as a clear oil (15.3 mg, 36%, >95:5 dr). <sup>1</sup>H NMR (400 MHz, CDCl<sub>3</sub>) δ 7.97 – 7.89 (m, 1H), 7.47 – 7.40 (m, 2H), 7.39 – 7.27 (m, 4H), 7.25 – 7.16 (m, 3H), 7.13 – 7.05 (m, 2H), 6.93 – 6.81 (m, 2H), 5.15 (dt, *J* = 10.0, 6.0 Hz, 1H), 4.74 (d, *J* = 6.6 Hz, 1H), 4.49 (dt, *J* = 10.1, 5.7 Hz, 1H), 4.28 (d, *J* = 6.6 Hz, 1H), 4.02 – 3.85 (m, 2H), 2.35 (s, 1H), 2.18 – 2.10 (m, 2H). <sup>13</sup>C NMR (101 MHz, CDCl<sub>3</sub>) δ 173.9, 165.6, 159.8, 140.8, 136.3, 132.3, 132.1, 131.8, 129.4, 129.2, 129.1, 128.6, 128.5, 128.3, 127.7, 126.9, 126.4, 100.1, 73.9, 59.5, 47.6, 44.2, 33.2. IR (neat): 3442, 2925, 1695, 1614, 1377, 741 cm<sup>-1</sup>. HRMS (ESI) *m/z* calcd for C<sub>27</sub>H<sub>24</sub>NO<sub>4</sub><sup>+</sup> [M+H]<sup>+</sup> 426.1700, found 426.1717.

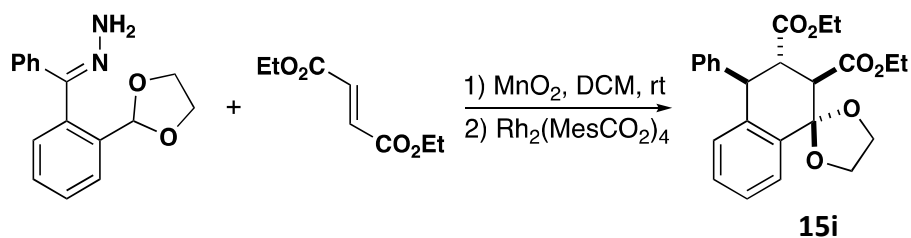

Diethyl (2*R*,3*S*,4*R*)-4-phenyl-3,4-dihydro-2*H*-spiro[naphthalene-1,2'-[1,3]dioxolane]-2,3-dicarboxylate was synthesized according to General Procedure H, using (*E*)-((2-(1,3-dioxolan-2-yl)phenyl)(phenyl)methylene)hydrazine (26.8 mg, 0.1 mmol), diethyl fumarate (0.01 mL, 0.1 mmol), MnO<sub>2</sub> (69.6 mg, 0.8 mmol), Rh<sub>2</sub>(MesCO<sub>2</sub>)<sub>4</sub> (0.9 mg, 0.001 mmol) and DCM (6 mL). The crude product was purified by flash column chromatography (hexane/EtOAc = 4:1, v/v) to obtain **15i** as a yellowish oil (22.7 mg, 55%, >95:5 dr). <sup>1</sup>H NMR (400 MHz, CDCl<sub>3</sub>) δ 7.45 (dd, *J* = 7.8, 1.5 Hz, 1H), 7.34 – 7.10 (m, 7H), 6.75 (dt, *J* = 7.8, 1.4 Hz, 1H), 4.41 – 4.35 (m, 1H), 4.25 –



4.09 (m, 6H), 3.91 (qt,  $J = 7.1, 3.7$  Hz, 2H), 3.73 (t,  $J = 11.5$  Hz, 1H), 3.52 (d,  $J = 11.8$  Hz, 1H), 1.28 (t,  $J = 7.1$  Hz, 3H), 0.92 (t,  $J = 7.1$  Hz, 3H).  $^{13}\text{C}$  NMR (101 MHz,  $\text{CDCl}_3$ )  $\delta$  173.6, 170.8, 143.1, 138.9, 137.7, 129.5, 129.5, 129.0, 128.6, 127.2, 126.7, 124.5, 107.7, 67.2, 65.1, 61.2, 60.6, 52.5, 50.0, 49.0, 14.3, 13.9. IR (neat): 2979, 2898, 1728, 1448, 1252  $\text{cm}^{-1}$ . HRMS (ESI)  $m/z$  calcd for  $\text{C}_{24}\text{H}_{27}\text{O}_6^+$   $[\text{M}+\text{H}]^+$  411.1802, found 411.1806.

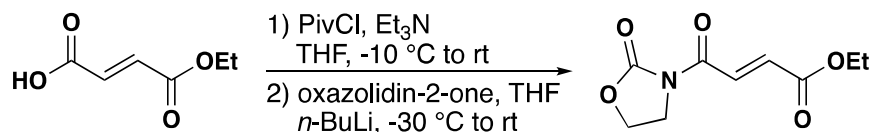

To a round bottom flask were added (*E*)-4-ethoxy-4-oxobut-2-enoic acid (720.7 mg, 5 mmol) and THF (20 mL). Then triethyl amine (0.76 mL, 5.5 mmol) and pivaloyl chloride (0.66 mL, 5 mmol) were added at  $-10$  °C. The reaction was then allowed to stir for 3 hours at room temperature. In another flask, oxazolidin-2-one (435.4 mg, 5 mmol) was dissolved in THF (20 mL) and cooled to  $-30$  °C before adding *n*-Buli (2.78 mL, 5 mmol). After stirring for one hour at room temperature, the oxazolidinone solution was cooled to  $-30$  °C and the anhydride solution was added dropwise. After allowing the reaction to stir overnight at room temperature, sodium bicarbonate was added (30 mL), the organic layer was extracted in diethyl ether (3x 50 mL), dried over sodium sulfate and concentrated in vacuo. The crude product was purified by flash column chromatography to obtain ethyl (*E*)-4-oxo-4-(2-oxooxazolidin-3-yl)but-2-enoate as a white powder (835.4 mg, 78%).  $^1\text{H}$  NMR (400 MHz,  $\text{CDCl}_3$ )  $\delta$  8.15 (d,  $J = 15.6$  Hz, 1H), 6.96 (d,  $J = 15.5$  Hz, 1H), 4.48 (dd,  $J = 8.5, 7.5$  Hz, 2H), 4.28 (q,  $J = 7.1$  Hz, 2H), 4.11 (dd,  $J = 8.6, 7.4$  Hz, 2H), 1.33 (t,  $J = 7.1$  Hz, 3H).  $^1\text{H}$  NMR data was consistent with reported literature values.<sup>6</sup>

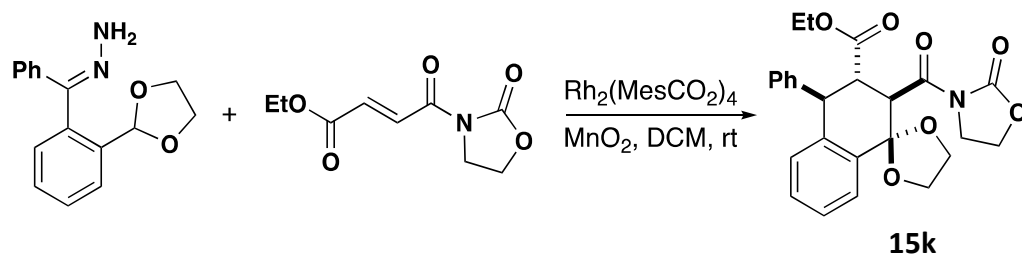

Ethyl (2*R*,3*S*,4*R*)-2-(2-oxooxazolidine-3-carbonyl)-4-phenyl-3,4-dihydro-2*H*-spiro[naphthalene-1,2'-[1,3]dioxolane]-3-carboxylate was synthesized according to General Procedure G, using (*E*)-((2-(1,3-dioxolan-2-yl)phenyl)(phenyl)methylene)hydrazine (26.8 mg, 0.1 mmol), ethyl (*E*)-4-oxo-4-(2-oxooxazolidin-3-yl)but-2-enoate (21.3 mg, 0.1 mmol),  $\text{MnO}_2$  (69.6 mg, 0.8 mmol),

Rh<sub>2</sub>(MesCO<sub>2</sub>)<sub>4</sub> (0.9 mg, 0.001 mmol) and DCM (6 mL). The crude product was purified by flash column chromatography (hexane/EtOAc = 1:1, v/v) to obtain **15k** as a white powder (35.0 mg, 77%, >95:5 dr). m.p. 217-218 °C. <sup>1</sup>H NMR (400 MHz, CDCl<sub>3</sub>) δ 7.41 (dd, *J* = 7.4, 1.9 Hz, 1H), 7.35 – 7.02 (m, 7H), 6.77 (dt, *J* = 7.8, 1.3 Hz, 1H), 5.23 (d, *J* = 10.6 Hz, 1H), 4.49 – 4.24 (m, 4H), 4.19 – 3.79 (m, 8H), 0.95 (t, *J* = 7.1 Hz, 3H). <sup>13</sup>C NMR (101 MHz, CDCl<sub>3</sub>) δ 173.6, 171.7, 153.2, 143.4, 139.3, 137.3, 129.6, 129.4, 129.0, 128.6, 127.0, 126.4, 123.6, 107.9, 67.2, 64.9, 61.7, 60.8, 49.6, 48.4, 48.1, 43.3, 13.9. IR (neat): 2897, 1788, 1724, 1687, 1390, 1371 cm<sup>-1</sup>. HRMS (ESI) *m/z* calcd for C<sub>25</sub>H<sub>26</sub>NO<sub>7</sub><sup>+</sup> [M+H]<sup>+</sup> 452.1704, found 452.1707.

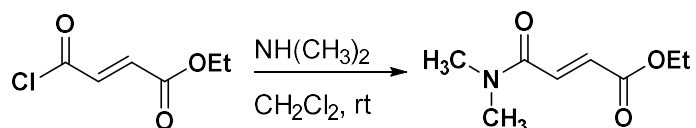

Ethyl (*E*)-4-(dimethylamino)-4-oxobut-2-enoate was synthesized by dissolving ethyl (*E*)-4-chloro-4-oxobut-2-enoate (1.3 g, 8 mmol) in DCM (15 mL). After cooling the solution to 0 °C, dimethyl amine (2 M) in methanol (8 mL, 16 mmol) was added dropwise. The reaction was allowed to stir overnight at room temperature. Sodium bicarbonate (20 mL) was added, and the organic layer was extracted in methylene chloride (3 × 20 mL). The combined organic layers were dried over sodium sulfate and concentrated in vacuo to afford a clear yellow oil (1.26 g, 92 %). <sup>1</sup>H NMR (400 MHz, CDCl<sub>3</sub>) δ 7.40 (d, *J* = 15.3 Hz, 1H), 6.78 (d, *J* = 15.3 Hz, 1H), 4.26 (q, *J* = 7.2 Hz, 2H), 3.13 (s, 3H), 3.04 (s, 3H), 1.32 (t, *J* = 7.1 Hz, 3H). <sup>1</sup>H NMR data was consistent with reported literature values.<sup>7</sup>

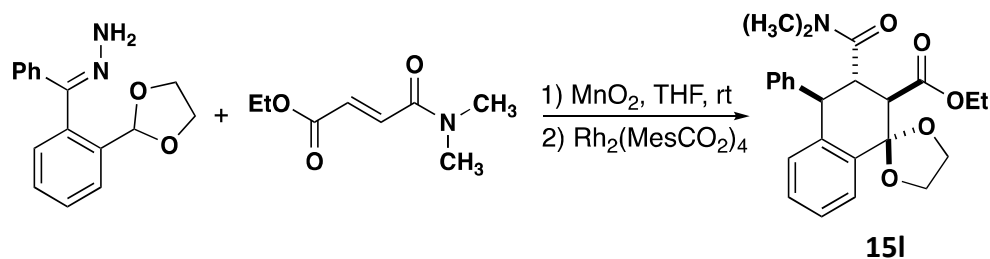

Ethyl (2*R*,3*S*,4*R*)-3-(dimethylcarbamoyl)-4-phenyl-3,4-dihydro-2*H*-spiro[naphthalene-1,2'-[1,3]dioxolane]-2-carboxylate was synthesized according to General Procedure H, using (*E*)-((2-(1,3-dioxolan-2-yl)phenyl)(phenyl)methylene)hydrazine (26.8 mg, 0.1 mmol), Ethyl (*E*)-4-(dimethylamino)-4-oxobut-2-enoate (17.1 mg, 0.1 mmol), MnO<sub>2</sub> (69.6 mg, 0.8 mmol), Rh<sub>2</sub>(MesCO<sub>2</sub>)<sub>4</sub> (0.9 mg, 0.001 mmol) and THF (6 mL). The crude product was purified by flash

column chromatography (hexane/EtOAc = 3:2, v/v) to obtain **15l** as a white powder (31.6 mg, 77%, >95:5 dr). m.p. 168-169 °C. <sup>1</sup>H NMR (400 MHz, CDCl<sub>3</sub>) δ 7.46 (dd, *J* = 7.8, 1.6 Hz, 1H), 7.34 – 7.12 (m, 7H), 6.81 (dt, *J* = 7.6, 1.3 Hz, 1H), 4.46 – 4.37 (m, 1H), 4.32 (d, *J* = 10.8 Hz, 1H), 4.23 – 3.96 (m, 6H), 3.65 (d, *J* = 11.8 Hz, 1H), 2.75 (s, 3H), 2.38 (s, 3H), 1.28 (t, *J* = 7.1 Hz, 3H). <sup>13</sup>C NMR (101 MHz, CDCl<sub>3</sub>) δ 173.2, 171.4, 144.3, 139.2, 138.1, 129.8, 129.5, 129.0, 128.6, 127.1, 126.5, 124.5, 108.1, 67.3, 64.8, 61.2, 52.6, 49.4, 46.0, 37.0, 35.7, 14.3. IR (neat): 3442, 2925, 1757, 1695, 1614, 1596, 1566, 1377 cm<sup>-1</sup>. HRMS (ESI) *m/z* calcd for C<sub>24</sub>H<sub>28</sub>NO<sub>5</sub><sup>+</sup> [M+H]<sup>+</sup> 410.1962, found 410.1963.

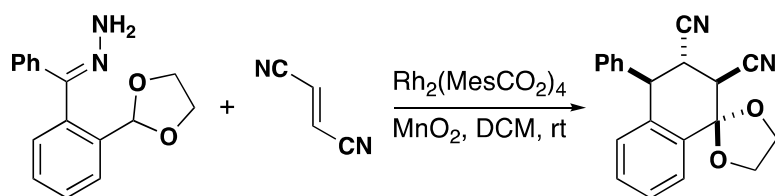

**15m**

(2*S*,3*S*,4*R*)-4-Phenyl-3,4-dihydro-2*H*-spiro[naphthalene-1,2'-[1,3]dioxolane]-2,3-dicarbonitrile was synthesized according to General Procedure G, using (*E*)-((2-(1,3-dioxolan-2-yl)phenyl)(phenyl)methylene)hydrazine (26.8 mg, 0.1 mmol), fumaronitrile (7.8 mg, 0.1 mmol), MnO<sub>2</sub> (69.6 mg, 0.8 mmol), Rh<sub>2</sub>(MesCO<sub>2</sub>)<sub>4</sub> (0.9 mg, 0.001 mmol) and DCM (6 mL). The crude product was purified by flash column chromatography (hexane/EtOAc = 4:1, v/v) to obtain **15m** as a white solid (20.1 mg, 65%, >95:5 dr). m.p. 209-211 °C. <sup>1</sup>H NMR (400 MHz, CDCl<sub>3</sub>) δ 7.46 (dd, *J* = 7.8, 1.5 Hz, 1H), 7.42 – 7.20 (m, 7H), 6.80 (d, *J* = 7.8 Hz, 1H), 4.65 – 4.41 (m, 3H), 4.30 (d, *J* = 11.4 Hz, 1H), 4.26 – 4.15 (m, 1H), 3.79 (t, *J* = 11.9 Hz, 1H), 3.57 (d, *J* = 12.4 Hz, 1H). <sup>13</sup>C NMR (101 MHz, CDCl<sub>3</sub>) δ 141.0, 136.2, 135.5, 130.1, 129.9, 129.4, 129.2, 128.5, 127.7, 124.8, 117.8, 116.4, 105.5, 68.7, 68.5, 66.3, 66.0, 48.6, 41.6, 37.7. IR (neat): 2922, 2853, 2252, 1765, 1453 cm<sup>-1</sup>. HRMS (ESI) *m/z* calcd for C<sub>20</sub>H<sub>17</sub>N<sub>2</sub>O<sub>2</sub><sup>+</sup> [M+H]<sup>+</sup> 317.1285, found 317.1286.

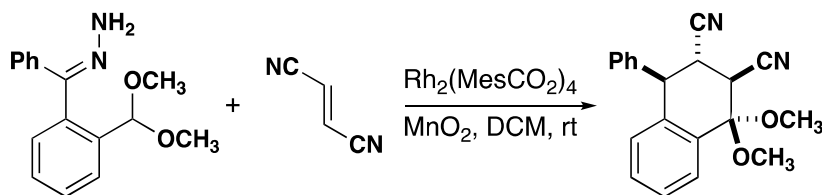

**15n**

(2*S*,3*S*,4*R*)-1,1-dimethoxy-4-phenyl-1,2,3,4-tetrahydronaphthalene-2,3-dicarbonitrile was synthesized according to General Procedure G, using (*E*)-((2-

(dimethoxymethyl)phenyl)(phenyl)methylene)hydrazine (27.0 mg, 0.1 mmol), fumaronitrile (7.8 mg, 0.1 mmol), MnO<sub>2</sub> (69.6 mg, 0.8 mmol), Rh<sub>2</sub>(MesCO<sub>2</sub>)<sub>4</sub> (0.9 mg, 0.001 mmol) and DCM (6 mL). The crude product was purified by flash column chromatography (hexane/EtOAc = 4:1, v/v) to obtain **15n** as a white solid (29.8 mg, 94%, >95:5 dr). m.p. 226-228 °C. <sup>1</sup>H NMR (400 MHz, CDCl<sub>3</sub>) δ 7.58 (d, *J* = 7.9 Hz, 1H), 7.47 (td, *J* = 7.6, 1.4 Hz, 1H), 7.41 – 7.31 (m, 4H), 7.31 – 7.13 (m, 3H), 4.87 (d, *J* = 9.4 Hz, 1H), 3.92 – 3.74 (m, 4H), 3.44 – 3.23 (m, 4H). <sup>13</sup>C NMR (101 MHz, CDCl<sub>3</sub>) δ 140.5, 136.0, 134.8, 129.6, 129.6, 129.2, 128.5, 128.3, 128.1, 127.3, 117.9, 115.3, 81.3, 78.7, 59.8, 51.5, 37.5, 33.7. IR (neat): 2935, 2249, 1488, 1445, 1213 cm<sup>-1</sup>. HRMS (TOF MS CI<sup>+</sup>) *m/z* calcd for C<sub>20</sub>H<sub>22</sub>N<sub>3</sub>O<sub>2</sub><sup>+</sup> [M+NH<sub>4</sub>]<sup>+</sup> 336.1712, found 336.1716.

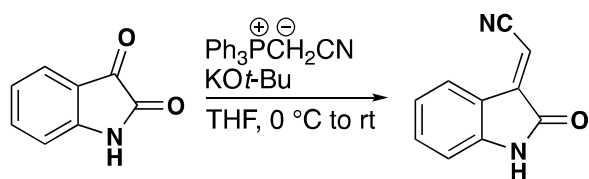

To a flame-dried round bottom flask were added (triphenylphosphoranylidene)acetonitrile (1.1 g, 3.3 mmol) and THF (10 mL). KO<sup>t</sup>-Bu (370.3 mg, 3.3 mmol) was then added. After the mixture was stirred at 0 °C for 30 min, indoline-2,3-dione (441.4 mg, 3 mmol) was added and the reaction was stirred for 1 h at room temperature. After quenched with H<sub>2</sub>O, the reaction was extracted with EtOAc (3 × 10 mL). The combined organic phases were washed with brine (1 × 10 mL). The organic phase was dried over anhydrous Na<sub>2</sub>SO<sub>4</sub>, filtered and concentrated. The residue was further purified by flash column chromatography (hexane/EtOAc = 4:1, v/v) to obtain the product as an orange solid (333.3 mg, 65%). <sup>1</sup>H NMR (400 MHz, CDCl<sub>3</sub>) δ 8.08 (d, *J* = 7.8 Hz, 1H), 7.88 (s, 1H), 7.40 (td, *J* = 7.8, 1.2 Hz, 1H), 7.12 (td, *J* = 7.7, 1.0 Hz, 1H), 6.89 (d, *J* = 7.9 Hz, 1H), 6.30 (s, 1H). <sup>1</sup>H NMR data was consistent with reported literature values.<sup>8</sup>

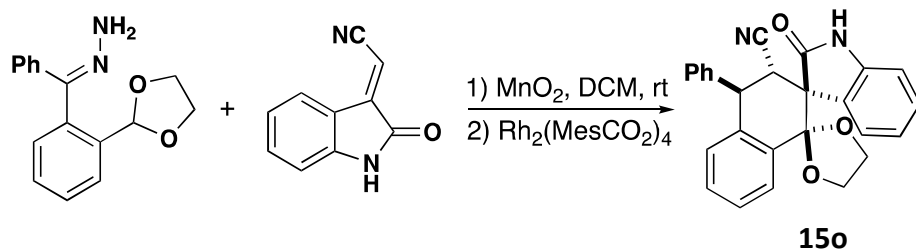

(3*S*,3'*S*,4'*R*)-2-Oxo-4'-phenyl-3',4'-dihydrodispiro[indoline-3,2'-naphthalene-1',2''-

[1,3]dioxolane]-3'-carbonitrile was synthesized according to General Procedure H, using (*E*)-2-(2-(1,3-dioxolan-2-yl)phenyl)(phenyl)methylene)hydrazine (26.8 mg, 0.1 mmol), (*E*)-2-(2-

oxindolin-3-ylidene)acetonitrile (15 mg, 0.12 mmol), MnO<sub>2</sub> (69.6 mg, 0.8 mmol), Rh<sub>2</sub>(MesCO<sub>2</sub>)<sub>4</sub> (0.9 mg, 0.001 mmol) and DCM (6 mL). The crude product was purified by flash column chromatography (hexane/EtOAc = 1:1, v/v) to obtain **15o** as a pale yellow solid (37.3 mg, 91%, >95:5 dr). m.p. 290-292 °C. <sup>1</sup>H NMR (400 MHz, CDCl<sub>3</sub>) δ 8.28 (s, 1H), 7.42 – 7.28 (m, 8H), 7.23 (d, *J* = 7.7 Hz, 1H), 7.01 (d, *J* = 7.4 Hz, 1H), 6.95 (d, *J* = 7.8 Hz, 1H), 6.82 (t, *J* = 7.7 Hz, 1H), 6.36 (d, *J* = 7.7 Hz, 1H), 4.50 (d, *J* = 11.0 Hz, 1H), 4.40 (d, *J* = 11.0 Hz, 1H), 4.35 – 4.26 (m, 2H), 4.21 – 4.14 (m, 1H), 4.13 – 4.06 (m, 1H). <sup>13</sup>C NMR (101 MHz, CDCl<sub>3</sub>) δ 175.7, 142.0, 141.9, 137.7, 136.6, 129.9, 129.8, 129.7, 129.4, 129.3, 128.1, 127.6, 125.3, 125.0, 124.4, 122.9, 118.1, 110.5, 108.8, 68.6, 66.0, 57.4, 46.4, 40.9. IR (neat): 3278, 2989, 2870, 1725, 1686, 1471, 756 cm<sup>-1</sup>. HRMS (ESI) *m/z* calcd for C<sub>26</sub>H<sub>21</sub>N<sub>2</sub>O<sub>3</sub><sup>+</sup> [M+H]<sup>+</sup> 409.1547, found 409.1546.

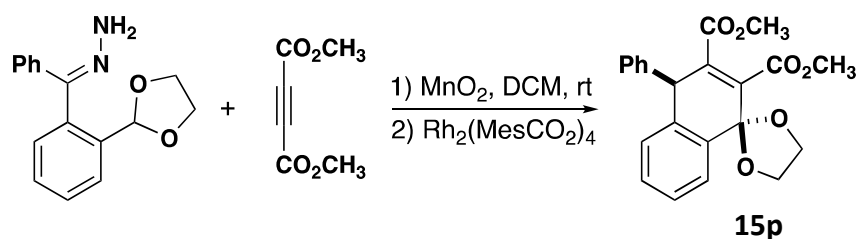

Dimethyl (*R*)-4-phenyl-4*H*-spiro[naphthalene-1,2'-[1,3]dioxolane]-2,3-dicarboxylate was synthesized according to General Procedure H, using (*E*)-((2-(1,3-dioxolan-2-yl)phenyl)(phenyl)methylene)hydrazine (26.8 mg, 0.1 mmol), dimethyl but-2-ynedioate (15 μL, 0.12 mmol), MnO<sub>2</sub> (69.6 mg, 0.8 mmol), Rh<sub>2</sub>(MesCO<sub>2</sub>)<sub>4</sub> (0.9 mg, 0.001 mmol) and DCM (6 mL). The crude product was purified by flash column chromatography (hexane/EtOAc = 4:1, v/v) to obtain **15p** as a clear oil (22.9 mg, 60%). <sup>1</sup>H NMR (400 MHz, CDCl<sub>3</sub>) δ 7.50 – 7.45 (m, 1H), 7.44 – 7.38 (m, 2H), 7.31 – 7.20 (m, 5H), 7.19 – 7.13 (m, 1H), 5.20 (s, 1H), 4.52 – 4.42 (m, 2H), 4.32 – 4.24 (m, 1H), 4.24 – 4.17 (m, 1H), 3.83 (s, 3H), 3.66 (s, 3H). <sup>13</sup>C NMR (101 MHz, CDCl<sub>3</sub>) δ 167.4, 165.8, 140.3, 139.3, 138.0, 137.0, 135.1, 129.03, 128.95, 128.9, 128.6, 127.19, 127.15, 124.9, 103.8, 68.9, 65.3, 52.63, 52.60, 46.7. IR (neat): 2975, 2857, 1725, 1259, 1070, 756, 701 cm<sup>-1</sup>. HRMS (ESI) *m/z* calcd for C<sub>22</sub>H<sub>21</sub>O<sub>6</sub><sup>+</sup> [M+H]<sup>+</sup> 381.1333, found 381.1327.

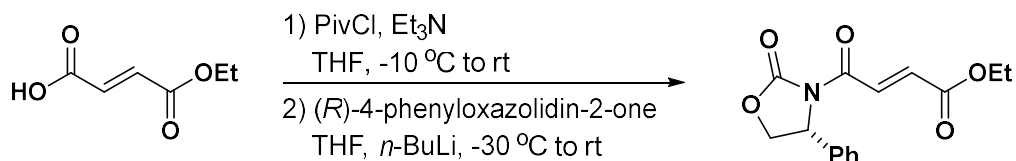

To a round bottom flask were added (*E*)-4-ethoxy-4-oxobut-2-enoic acid (144.3 mg, 1 mmol) and THF (5 mL). Then triethyl amine (0.12 mL, 1.2 mmol) and pivaloyl chloride (144.7 mg, 1.2 mmol) were added at -10 °C. The reaction was then allowed to stir for 3 hours at room temperature. In another flask, (*R*)-4-phenyloxazolidin-2-one (163.2 mg, 1 mmol) was dissolved in THF (5 mL) and cooled to -30 °C before adding *n*-Buli (0.53 mL, 1.2 mmol). After stirring for one hour at room temperature, the oxazolidinone solution was cooled to -30 °C and the anhydride solution was added dropwise. After allowing the reaction to stir overnight at room temperature, sodium bicarbonate was added (30 mL), the organic layer was extracted in diethyl ether (3x 50 mL), dried over sodium sulfate and concentrated in vacuo. The crude product was purified by flash column chromatography to obtain ethyl (*R,E*)-4-oxo-4-(2-oxo-4-phenyloxazolidin-3-yl)but-2-enoate as a white powder (188.0 mg, 65%). <sup>1</sup>H NMR (400 MHz, CDCl<sub>3</sub>) δ 8.16 (d, *J* = 15.6 Hz, 1H), 7.47 – 7.29 (m, 5H), 6.86 (d, *J* = 15.6 Hz, 1H), 5.50 (dd, *J* = 8.7, 4.0 Hz, 1H), 4.76 (t, *J* = 8.8 Hz, 1H), 4.35 (dd, *J* = 8.9, 4.0 Hz, 1H), 4.26 (q, *J* = 7.1 Hz, 2H), 1.31 (t, *J* = 7.1 Hz, 3H). <sup>1</sup>H NMR data was consistent with reported literature values.<sup>6</sup>

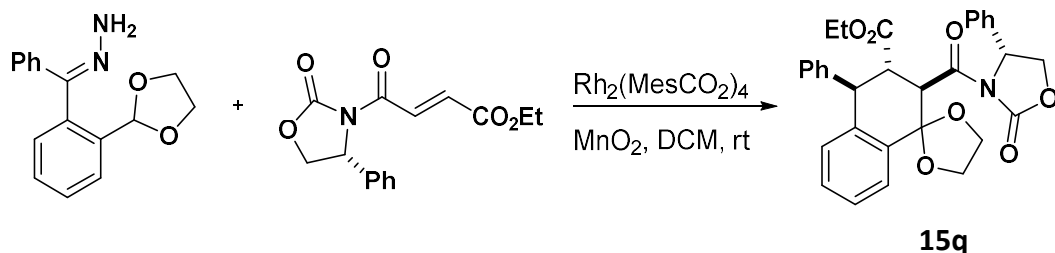

Ethyl (2*R*,3*S*,4*R*)-2-((*R*)-2-oxo-4-phenyloxazolidin-3-carbonyl)-4-phenyl-3,4-dihydro-2*H*-spiro[naphthalene-1,2'-[1,3]dioxolane]-3-carboxylate was synthesized according to General Procedure G, using (*E*)-((2-(1,3-dioxolan-2-yl)phenyl)(phenyl)methylene)hydrazine (26.8 mg, 0.1 mmol), ethyl (*R,E*)-4-oxo-4-(2-oxo-4-phenyloxazolidin-3-yl)but-2-enoate (28.9 mg, 0.1 mmol), MnO<sub>2</sub> (69.6 mg, 0.8 mmol), Rh<sub>2</sub>(MesCO<sub>2</sub>)<sub>4</sub> (0.9 mg, 0.001 mmol) and DCM (6 mL). The crude product was purified by flash column chromatography (hexane/EtOAc = 1:1, v/v) to obtain **15q** as a white powder (26.4 mg, 46%, 78:22 dr). m.p. 235-237 °C. <sup>1</sup>H NMR (400 MHz, CDCl<sub>3</sub>) δ 7.41 (dd, *J* = 7.6, 1.6 Hz, 1H), 7.37 – 7.07 (m, 12H), 6.72 (d, *J* = 7.5 Hz, 1H), 5.46 (dd, *J* = 8.3, 2.9 Hz, 1H), 5.31 (d, *J* = 10.2 Hz, 1H), 4.67 (t, *J* = 8.6 Hz, 1H), 4.50 – 4.21 (m, 3H), 4.22 – 3.97 (m, 3H), 3.84 – 3.64 (m, 3H), 0.80 (t, *J* = 7.1 Hz, 3H). <sup>13</sup>C NMR (101 MHz, CDCl<sub>3</sub>) δ 173.17, 170.95, 153.46, 142.83, 139.46, 139.02, 137.22, 129.61, 129.25, 129.12, 129.03, 128.59, 127.09, 126.44, 125.93,

123.53, 107.93, 69.82, 67.06, 65.17, 60.64, 58.32, 49.76, 48.96, 47.99, 13.89. IR (neat): 2899, 1782, 1726, 1689, 1392, 1377  $\text{cm}^{-1}$ . HRMS (ESI)  $m/z$  calcd for  $\text{C}_{31}\text{H}_{30}\text{NO}_7^+$   $[\text{M}+\text{H}]^+$  528.2017, found 528.2019.

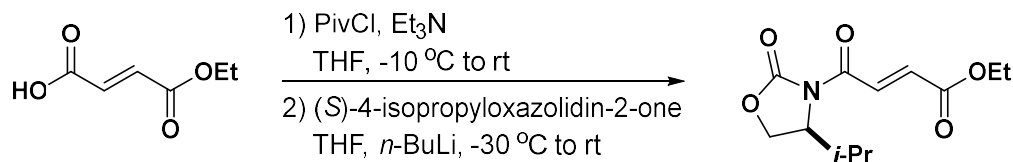

To a round bottom flask were added (*E*)-4-ethoxy-4-oxobut-2-enoic acid (144.3 mg, 1 mmol) and THF (5 mL). Then triethyl amine (0.12 mL, 1.2 mmol) and pivaloyl chloride (144.7 mg, 1.2 mmol) were added at  $-10\text{ }^\circ\text{C}$ . The reaction was then allowed to stir for 3 hours at room temperature. In another flask, (*S*)-4-isopropylloxazolidin-2-one (128.2 mg, 1 mmol) was dissolved in THF (5 mL) and cooled to  $-30\text{ }^\circ\text{C}$  before adding *n*-Buli (0.53 mL, 1.2 mmol). After stirring for one hour at room temperature, the oxazolidinone solution was cooled to  $-30\text{ }^\circ\text{C}$  and the anhydride solution was added dropwise. After allowing the reaction to stir overnight at room temperature, sodium bicarbonate was added (30 mL), the organic layer was extracted in diethyl ether (3x 50 mL), dried over sodium sulfate and concentrated in vacuo. The crude product was purified by flash column chromatography to obtain ethyl (*S,E*)-4-(4-isopropyl-2-oxooxazolidin-3-yl)-4-oxobut-2-enoate as a clear oil (145.5 mg, 57%).  $^1\text{H}$  NMR (400 MHz,  $\text{CDCl}_3$ )  $\delta$  8.17 (dd,  $J = 15.6, 1.0$  Hz, 1H), 6.93 (dd,  $J = 15.6, 1.1$  Hz, 1H), 4.51 (dt,  $J = 7.8, 3.6$  Hz, 1H), 4.41 – 4.23 (m, 4H), 2.43 (pd,  $J = 6.9, 3.9$  Hz, 1H), 1.33 (td,  $J = 7.1, 1.0$  Hz, 3H), 1.02 – 0.93 (m, 3H), 0.92 – 0.87 (m, 3H).  $^1\text{H}$  NMR data was consistent with reported literature values.<sup>6</sup>

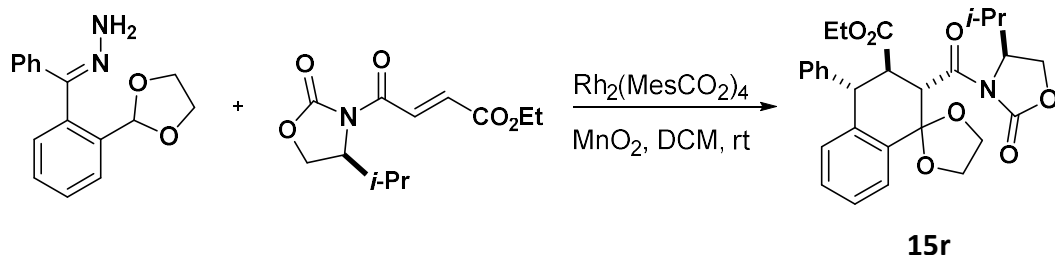

Ethyl (2*S*,3*R*,4*S*)-2-((*S*)-4-isopropyl-2-oxooxazolidin-3-carbonyl)-4-phenyl-3,4-dihydro-2*H*-spiro[naphthalene-1,2'-[1,3]dioxolane]-3-carboxylate was synthesized according to General Procedure G, using (*E*)-((2-(1,3-dioxolan-2-yl)phenyl)(phenyl)methylene)hydrazine (26.8 mg, 0.1 mmol), ethyl (*S,E*)-4-(4-isopropyl-2-oxooxazolidin-3-yl)-4-oxobut-2-enoate (25.5 mg, 0.1 mmol),

MnO<sub>2</sub> (69.6 mg, 0.8 mmol), Rh<sub>2</sub>(MesCO<sub>2</sub>)<sub>4</sub> (0.9 mg, 0.001 mmol) and DCM (6 mL). The crude product was purified by flash column chromatography (hexane/EtOAc = 1:1, v/v) to obtain **15r** as a clear oil (35.0 mg, 71%, 81:19 dr). <sup>1</sup>H NMR (400 MHz, CDCl<sub>3</sub>) δ 7.40 (dd, *J* = 7.2, 1.9 Hz, 1H), 7.36 – 7.23 (m, 5H), 7.23 – 7.11 (m, 2H), 6.75 (dt, *J* = 7.7, 1.3 Hz, 1H), 5.29 (d, 1H), 4.44 (ddd, *J* = 7.3, 4.1, 2.8 Hz, 1H), 4.36 (d, *J* = 11.2 Hz, 1H), 4.31 – 4.18 (m, 3H), 4.16 – 4.01 (m, 3H), 3.93 (qd, *J* = 7.1, 4.6 Hz, 2H), 3.84 (dd, *J* = 11.3, 10.1 Hz, 1H), 2.32 (pd, *J* = 7.0, 4.1 Hz, 1H), 0.97 (t, *J* = 7.1 Hz, 3H), 0.90 (d, *J* = 7.0 Hz, 6H). <sup>13</sup>C NMR (101 MHz, CDCl<sub>3</sub>) δ 173.35, 171.48, 153.85, 142.95, 139.45, 137.16, 129.60, 129.20, 128.97, 128.57, 127.05, 126.38, 123.48, 107.87, 66.92, 65.06, 63.37, 60.71, 59.44, 49.85, 48.67, 47.91, 28.85, 18.04, 14.95, 13.99. IR (neat): 2895, 1780, 1721, 1675, 1395, 1374 cm<sup>-1</sup>. HRMS (ESI) *m/z* calcd for C<sub>28</sub>H<sub>32</sub>NO<sub>7</sub><sup>+</sup> [M+H]<sup>+</sup> 494.2173, found 494.2170.

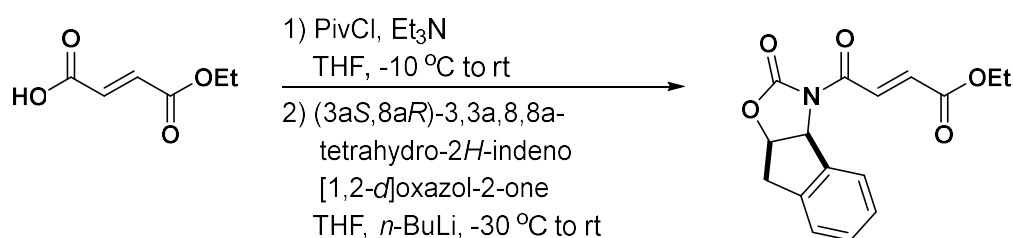

To a round bottom flask were added (*E*)-4-ethoxy-4-oxobut-2-enoic acid (144.3 mg, 1 mmol) and THF (5 mL). Then triethyl amine (0.12 mL, 1.2 mmol) and pivaloyl chloride (144.7 mg, 1.2 mmol) were added at -10 °C. The reaction was then allowed to stir for 3 hours at room temperature. In another flask, (3a*S*,8a*R*)-3,3a,8,8a-tetrahydro-2*H*-indeno[1,2-*d*]oxazol-2-one (175.2 mg, 1 mmol) was dissolved in THF (5 mL) and cooled to -30 °C before adding *n*-Buli (0.53 mL, 1.2 mmol). After stirring for one hour at room temperature, the oxazolidinone solution was cooled to -30 °C and the anhydride solution was added dropwise. After allowing the reaction to stir overnight at room temperature, sodium bicarbonate was added (30 mL), the organic layer was extracted in diethyl ether (3x 50 mL), dried over sodium sulfate and concentrated in vacuo. The crude product was purified by flash column chromatography to obtain ethyl (*E*)-4-oxo-4-((3a*S*,8a*R*)-2-oxo-8,8a-dihydro-2*H*-indeno[1,2-*d*]oxazol-3(3a*H*)-yl)but-2-enoate as a white powder (118.3 mg, 40 %). <sup>1</sup>H NMR (300 MHz, CDCl<sub>3</sub>) δ 8.14 (d, *J* = 15.6 Hz, 1H), 7.72 – 7.59 (m, 1H), 7.39 – 7.26 (m, 3H), 7.01 (d, *J* = 15.5 Hz, 1H), 6.00 (d, *J* = 6.9 Hz, 1H), 5.35 (ddd, *J* = 7.1, 4.6, 2.7 Hz, 1H), 4.26 (q, *J* = 7.1 Hz, 2H), 3.47 – 3.36 (m, 2H), 1.32 (t, *J* = 7.1 Hz, 3H). <sup>1</sup>H NMR data was consistent with reported literature values.<sup>6</sup>



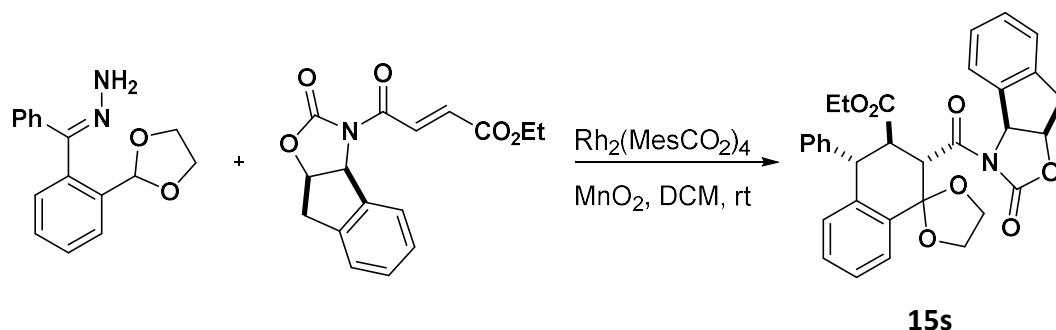

Ethyl (2S,3R,4S)-2-((3aS,8aR)-2-oxo-3,3a,8,8a-tetrahydro-2H-indeno[1,2-d]oxazole-3-carbonyl)-4-phenyl-3,4-dihydro-2H-spiro[naphthalene-1,2'-[1,3]dioxolane]-3-carboxylate was synthesized according to General Procedure G, using (E)-((2-(1,3-dioxolan-2-yl)phenyl)(phenyl)methylene)hydrazine (26.8 mg, 0.1 mmol), ethyl (E)-4-oxo-4-((3aS,8aR)-2-oxo-8,8a-dihydro-2H-indeno[1,2-d]oxazol-3(3aH)-yl)but-2-enoate (30.1 mg, 0.1 mmol), MnO<sub>2</sub> (69.6 mg, 0.8 mmol), Rh<sub>2</sub>(MesCO<sub>2</sub>)<sub>4</sub> (0.9 mg, 0.001 mmol) and DCM (6 mL). The crude product was purified by flash column chromatography (hexane/EtOAc = 1:1, v/v) to obtain **15s** as a clear oil (36.0 mg, 67 %, 85:15 dr). <sup>1</sup>H NMR (400 MHz, CDCl<sub>3</sub>) δ 7.54 (d, *J* = 7.7 Hz, 1H), 7.42 (dd, *J* = 7.3, 1.9 Hz, 1H), 7.37 – 7.09 (m, 11H), 6.85 – 6.67 (m, 1H), 5.95 (d, *J* = 6.7 Hz, 1H), 5.34 – 5.18 (m, 2H), 4.49 – 4.31 (m, 2H), 4.24 – 4.03 (m, 3H), 3.93 (t, *J* = 10.8 Hz, 1H), 3.81 (ddd, *J* = 40.6, 10.7, 7.1 Hz, 1H), 3.37 (d, *J* = 5.4 Hz, 2H), 0.82 (t, *J* = 7.1 Hz, 3H). <sup>13</sup>C NMR (101 MHz, CDCl<sub>3</sub>) δ 172.81, 172.00, 152.68, 143.15, 139.47, 139.45, 139.14, 137.13, 129.95, 129.57, 129.35, 129.04, 128.60, 128.19, 127.56, 127.06, 126.37, 125.19, 123.44, 107.87, 77.83, 67.07, 65.09, 63.89, 60.73, 49.83, 48.63, 47.77, 37.94. IR (neat): 2893, 1777, 1724, 1676, 1393, 1375 cm<sup>-1</sup>. HRMS (ESI) *m/z* calcd for C<sub>32</sub>H<sub>30</sub>NO<sub>7</sub><sup>+</sup> [M+H]<sup>+</sup> 540.2017, found 540.2015.

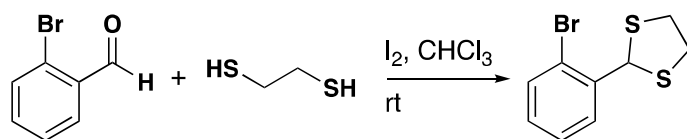

To a flame-dried round bottom flask were added 2-bromobenzaldehyde (0.6 mL, 5 mmol), ethane-1,2-dithiol (0.5 mL, 6 mmol), iodine (126.9 mg, 0.5 mmol) and chloroform (25 mL). The

reaction was stirred under room temperature for 18 h. Upon full conversion determined by  $^1\text{H}$  NMR, the reaction was quenched with 2 N NaOH aqueous solution and extracted with EtOAc ( $3 \times 10$  mL). The combined organic phases were washed with  $\text{H}_2\text{O}$  ( $1 \times 10$  mL) and brine ( $1 \times 10$  mL). The organic phase was dried over anhydrous  $\text{Na}_2\text{SO}_4$ , filtered and concentrated. The residue was further purified by flash column chromatography (hexane/EtOAc = 10:1, v/v) to obtain 2-(2-bromophenyl)-1,3-dithiolane as a colorless oil (quantitative yield).  $^1\text{H}$  NMR (400 MHz,  $\text{C}_6\text{D}_6$ )  $\delta$  7.84 (dd,  $J = 7.9, 1.7$  Hz, 1H), 7.25 (dd,  $J = 8.0, 1.3$  Hz, 1H), 6.91 (td,  $J = 7.6, 1.3$  Hz, 1H), 6.59 (td,  $J = 7.7, 1.7$  Hz, 1H), 6.15 (s, 1H), 2.82 – 2.72 (m, 2H), 2.72 – 2.62 (m, 2H).  $^1\text{H}$  NMR data was consistent with reported literature values.<sup>9</sup>

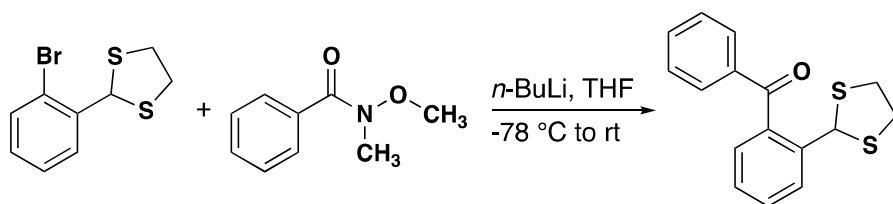

(2-(1,3-Dithiolan-2-yl)phenyl)(phenyl)methanone was synthesized according to General Procedure B, using 2-(2-bromophenyl)-1,3-dithiolane (1.04 g, 4 mmol),  $n\text{-BuLi}$  (2.5 M, 1.76 mL, 4.4 mmol),  $N\text{-methoxy-}N\text{-methylbenzamide}$  (0.99 g, 6 mmol) and THF (25 mL). The crude product was purified by flash column chromatography (hexane/EtOAc = 15:1, v/v) to obtain the ketone as a yellow oil (554.2 mg, 48%).  $^1\text{H}$  NMR (400 MHz,  $\text{CDCl}_3$ )  $\delta$  8.04 (d,  $J = 8.0$  Hz, 1H), 7.83 (d,  $J = 8.3$  Hz, 2H), 7.60 (t,  $J = 7.4$  Hz, 1H), 7.55 – 7.42 (m, 3H), 7.35 – 7.26 (m, 2H), 5.84 (s, 1H), 3.52 – 3.41 (m, 2H), 3.35 – 3.24 (m, 2H).  $^{13}\text{C}$  NMR (101 MHz,  $\text{CDCl}_3$ )  $\delta$  197.8, 140.5, 138.2, 137.6, 133.6, 131.0, 130.6, 129.5, 128.63, 128.60, 127.2, 52.5, 40.4. HRMS (ESI)  $m/z$  calcd for  $\text{C}_{16}\text{H}_{15}\text{OS}_2^+$   $[\text{M}+\text{H}]^+$  287.0559, found 287.0565.

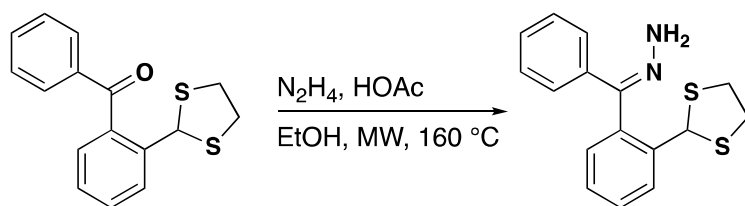

(*E*)-((2-(1,3-Dithiolan-2-yl)phenyl)(phenyl)methylene)hydrazine was synthesized according to General Procedure C, using (2-(1,3-dithiolan-2-yl)phenyl)(phenyl)methanone (344.4 mg, 1.2 mmol),  $\text{N}_2\text{H}_4$  (0.49 mL, 15.6 mmol), HOAc (0.08 mL, 1.44 mmol) and EtOH (3.6 mL). After the reaction, the precipitated solid was filtered and washed with hexane. The product was then

dried on the vacuum and obtained as a white solid (238.7 mg, 66%). m.p. 147-149 °C.  $^1\text{H}$  NMR (400 MHz,  $\text{CDCl}_3$ )  $\delta$  8.03 (dd,  $J = 7.9, 1.3$  Hz, 1H), 7.54 – 7.37 (m, 4H), 7.36 – 7.27 (m, 3H), 7.08 (dd,  $J = 7.5, 1.4$  Hz, 1H), 5.49 (s, 1H), 5.39 (s, 2H), 3.53 – 3.41 (m, 2H), 3.33 – 3.18 (m, 2H).  $^{13}\text{C}$  NMR (101 MHz,  $\text{CD}_2\text{Cl}_2$ )  $\delta$  147.1, 140.8, 138.4, 132.3, 130.2, 130.0, 129.3, 128.9, 128.6, 128.5, 126.3, 52.4, 40.9, 40.7. HRMS (ESI)  $m/z$  calcd for  $\text{C}_{16}\text{H}_{17}\text{N}_2\text{S}_2^+$   $[\text{M}+\text{H}]^+$  301.0828, found 301.0832.

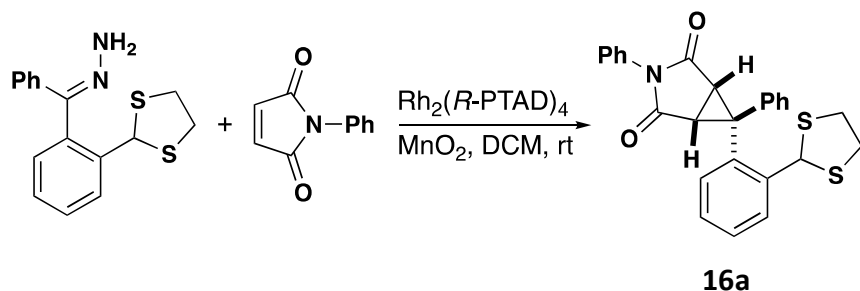

6-(2-(1,3-Dithiolan-2-yl)phenyl)-3,6-diphenyl-3-azabicyclo[3.1.0]hexane-2,4-dione was synthesized according to General Procedure G, using (*E*)-((2-(1,3-dithiolan-2-yl)phenyl)(phenyl)methylene)hydrazine (30.0 mg, 0.1 mmol), 1-phenyl-1*H*-pyrrole-2,5-dione (20.8 mg, 0.12 mmol),  $\text{MnO}_2$  (69.6 mg, 0.8 mmol),  $\text{Rh}_2(\text{R-PTAD})_4$  (1.6 mg, 0.001 mmol) and DCM (6 mL). The crude product was purified by flash column chromatography (hexane/EtOAc = 4:1, v/v) to obtain **16a** as a white solid (35.6 mg, 80%, >95:5 dr). m.p. 192-194 °C.  $^1\text{H}$  NMR (400 MHz,  $\text{CDCl}_3$ )  $\delta$  7.95 (d,  $J = 8.0$  Hz, 1H), 7.51 – 7.41 (m, 2H), 7.37 – 7.28 (m, 3H), 7.28 – 7.20 (m, 4H), 7.09 (d,  $J = 6.8$  Hz, 2H), 6.45 – 6.36 (m, 2H), 6.11 (s, 1H), 3.74 (d,  $J = 5.4$  Hz, 1H), 3.59 – 3.49 (m, 1H), 3.43 – 3.31 (m, 2H), 3.26 – 3.15 (m, 1H), 3.10 (d,  $J = 5.4$  Hz, 1H).  $^{13}\text{C}$  NMR (101 MHz,  $\text{CDCl}_3$ )  $\delta$  171.8, 171.4, 144.0, 139.6, 132.5, 131.3, 131.2, 130.6, 129.8, 129.09, 129.07, 128.6, 128.5, 128.2, 126.6, 126.4, 50.7, 47.1, 41.1, 40.7, 36.5, 34.6. IR (neat): 2921, 2852, 1707, 1375, 1170  $\text{cm}^{-1}$ . HRMS (ESI)  $m/z$  calcd for  $\text{C}_{26}\text{H}_{22}\text{NO}_2\text{S}_2^+$   $[\text{M}+\text{H}]^+$  444.1086, found 444.1089.

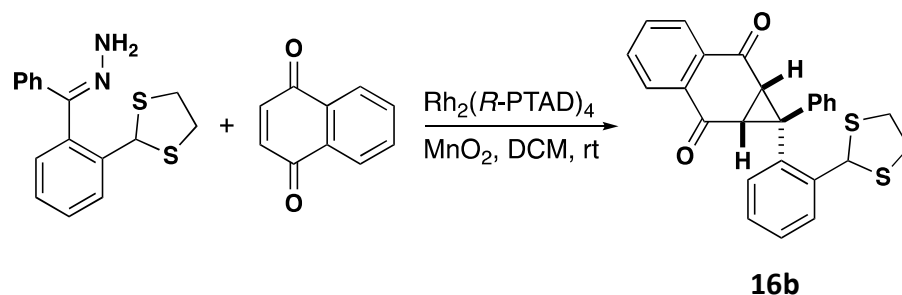

1-(2-(1,3-dithiolan-2-yl)phenyl)-1-phenyl-1a,7a-dihydro-1*H*-cyclopropa[*b*]naphthalene-2,7-dione was synthesized according to General Procedure G, using (*E*)-((2-(1,3-dithiolan-2-

yl)phenyl)(phenyl)methylene)hydrazine (30.0 mg, 0.1 mmol), naphthalene-1,4-dione (19.0 mg, 0.12 mmol), MnO<sub>2</sub> (69.6 mg, 0.8 mmol), Rh<sub>2</sub>(*R*-PTAD)<sub>4</sub> (1.6 mg, 0.001 mmol) and DCM (6 mL). The crude product was purified by flash column chromatography (hexane/EtOAc = 8:1, v/v) to obtain **7b** as a white solid (30.7 mg, 72%, >95:5 dr). m.p. 167-169 °C. <sup>1</sup>H NMR (400 MHz, CDCl<sub>3</sub>) δ 7.85 – 7.76 (m, 2H), 7.54 (dd, *J* = 7.9, 1.4 Hz, 1H), 7.50 – 7.41 (m, 2H), 7.36 – 7.29 (m, 2H), 7.29 – 7.23 (m, 1H), 7.19 – 7.10 (m, 3H), 7.01 (td, *J* = 7.6, 1.4 Hz, 1H), 6.85 (td, *J* = 7.5, 1.4 Hz, 1H), 5.91 (s, 1H), 3.84 (d, *J* = 7.4 Hz, 1H), 3.54 – 3.45 (m, 1H), 3.41 – 3.28 (m, 2H), 3.24 – 3.16 (m, 2H). <sup>13</sup>C NMR (101 MHz, CDCl<sub>3</sub>) δ 192.2, 191.6, 143.0, 141.7, 134.8, 133.9, 133.77, 133.75, 132.6, 131.4, 131.0, 129.0, 128.9, 127.9, 127.5, 126.8, 126.1, 51.2, 45.8, 42.6, 41.0, 40.6, 40.5. IR (neat): 2922, 1672, 1593, 1294, 750, 695 cm<sup>-1</sup>. HRMS (ESI) *m/z* calcd for C<sub>26</sub>H<sub>21</sub>O<sub>2</sub>S<sub>2</sub><sup>+</sup> [M+H]<sup>+</sup> 429.0977, found 429.0973.

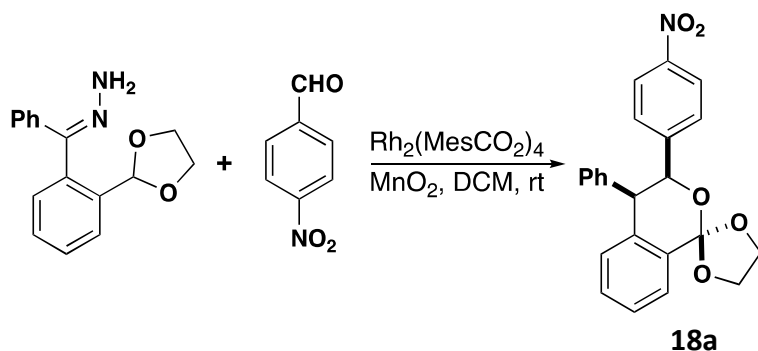

(3*R*,4*S*)-3-(4-Nitrophenyl)-4-phenylspiro[isochromane-1,2'-[1,3]dioxolane] was synthesized according to General Procedure G, using (*E*)-((2-(1,3-dioxolan-2-yl)phenyl)(phenyl)methylene)hydrazine (26.8 mg, 0.1 mmol), 4-nitrobenzaldehyde (18.1 mg, 0.12 mmol), MnO<sub>2</sub> (69.6 mg, 0.8 mmol), Rh<sub>2</sub>(MesCO<sub>2</sub>)<sub>4</sub> (0.9 mg, 0.001 mmol) and DCM (6 mL). The crude product was purified by flash column chromatography (hexane/DCM = 1:1, v/v) to obtain **18a** as a pale yellow solid (26.1 mg, 67%, >95:5 dr). m.p. 198-200 °C. <sup>1</sup>H NMR (400 MHz, CDCl<sub>3</sub>) δ 8.02 (d, *J* = 8.8 Hz, 2H), 7.58 (dd, *J* = 7.5, 1.7 Hz, 1H), 7.38 – 7.28 (m, 2H), 7.21 (d, *J* = 8.8 Hz, 2H), 7.11 – 6.98 (m, 4H), 6.82 – 6.70 (m, 2H), 5.73 (d, *J* = 3.4 Hz, 1H), 4.55 – 4.45 (m, 1H), 4.37 (q, *J* = 7.3 Hz, 1H), 4.32 – 4.23 (m, 1H), 4.18 (t, *J* = 7.6 Hz, 1H), 4.14 (d, *J* = 3.5 Hz, 1H). <sup>13</sup>C NMR (101 MHz, CDCl<sub>3</sub>) δ 147.1, 147.1, 139.1, 138.6, 131.8, 130.1, 130.0, 129.3, 128.0, 127.6, 127.0, 126.9, 123.1, 119.4, 75.9, 66.4, 64.4, 50.0. IR (neat): 2910, 1519, 1344, 1011, 764, 711, 697 cm<sup>-1</sup>. HRMS (ESI) *m/z* calcd for C<sub>23</sub>H<sub>20</sub>NO<sub>5</sub><sup>+</sup> [M+H]<sup>+</sup> 390.1336, found 390.1338.

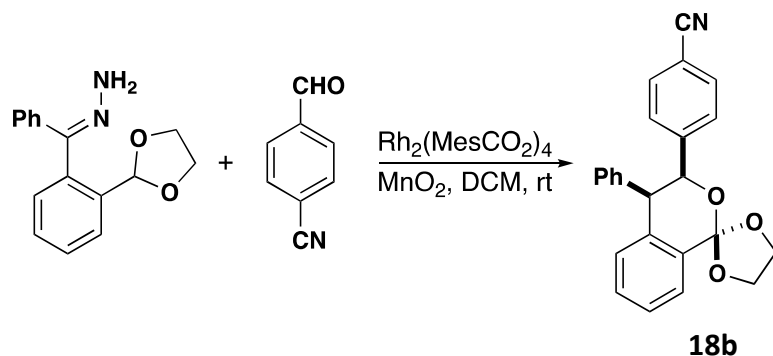

4-((3*R*,4*S*)-4-phenylspiro[isochromane-1,2'-[1,3]dioxolan]-3-yl)benzonitrile was synthesized according to General Procedure H, using (*E*)-((2-(1,3-dioxolan-2-yl)phenyl)(phenyl)methylene)hydrazine (26.8 mg, 0.1 mmol), 4-formylbenzonitrile (15.7 mg, 0.12 mmol), MnO<sub>2</sub> (69.6 mg, 0.8 mmol), Rh<sub>2</sub>(MesCO<sub>2</sub>)<sub>4</sub> (0.9 mg, 0.001 mmol) and DCM (6 mL). The crude product was purified by flash column chromatography (hexane/DCM = 1:3, v/v) to obtain **18b** as a white solid (22.7 mg, 61%, >95:5 dr). m.p. 289-291 °C. <sup>1</sup>H NMR (400 MHz, CDCl<sub>3</sub>) δ 7.58 (dd, *J* = 7.6, 1.7 Hz, 1H), 7.45 (d, *J* = 8.3 Hz, 2H), 7.38 – 7.28 (m, 2H), 7.15 (d, *J* = 8.1 Hz, 2H), 7.09 – 6.98 (m, 4H), 6.74 (dd, *J* = 7.5, 2.1 Hz, 2H), 5.67 (d, *J* = 3.4 Hz, 1H), 4.54 – 4.45 (m, 1H), 4.36 (q, *J* = 7.3 Hz, 1H), 4.31 – 4.23 (m, 1H), 4.16 (q, *J* = 7.6 Hz, 1H), 4.10 (d, *J* = 3.5 Hz, 1H). <sup>13</sup>C NMR (101 MHz, CDCl<sub>3</sub>) δ 145.1, 139.2, 138.6, 131.9, 131.7, 130.1, 130.0, 129.3, 127.9, 127.6, 127.0, 126.9, 126.8, 119.4, 119.0, 111.0, 76.0, 66.4, 64.3, 50.0. IR (neat): 2888, 2225, 1068, 1019, 945, 765, 739 cm<sup>-1</sup>. HRMS (ESI) *m/z* calcd for C<sub>24</sub>H<sub>20</sub>NO<sub>3</sub><sup>+</sup> [M+H]<sup>+</sup> 370.1438, found 370.1437.

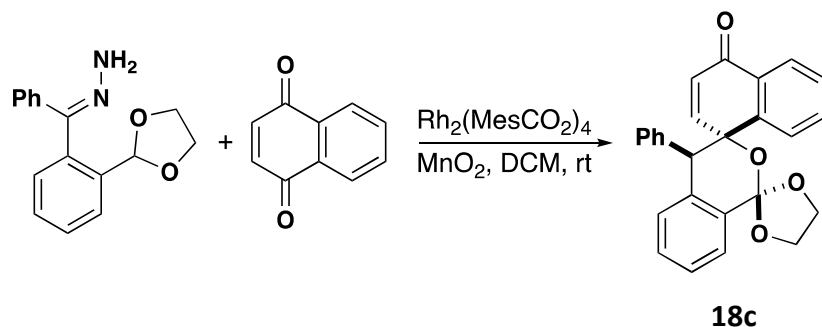

(1*S*,4'*R*)-4'-Phenyl-4*H*-dispiro[naphthalene-1,3'-isochromane-1',2''-[1,3]dioxolan]-4-one was synthesized according to General Procedure G, using (*E*)-((2-(1,3-dioxolan-2-yl)phenyl)(phenyl)methylene)hydrazine (26.8 mg, 0.1 mmol), naphthalene-1,4-dione (19.0 mg, 0.12 mmol), MnO<sub>2</sub> (69.6 mg, 0.8 mmol), Rh<sub>2</sub>(MesCO<sub>2</sub>)<sub>4</sub> (0.9 mg, 0.001 mmol) and DCM (6 mL). The crude product was purified by flash column chromatography (hexane/EtOAc = 5:1, v/v) to obtain **18c** as a white solid (37.5 mg, 95%, >95:5 dr). m.p. 190-192 °C. <sup>1</sup>H NMR (400 MHz, CD<sub>2</sub>Cl<sub>2</sub>)

$\delta$  7.91 (d,  $J$  = 7.8 Hz, 1H), 7.69 (d,  $J$  = 7.8 Hz, 1H), 7.61 (d,  $J$  = 10.5 Hz, 1H), 7.42 (t,  $J$  = 8.0 Hz, 1H), 7.38 – 7.25 (m, 2H), 7.19 – 6.99 (m, 4H), 6.96 (d,  $J$  = 7.7 Hz, 1H), 6.72 (d,  $J$  = 8.0 Hz, 1H), 6.61 (d,  $J$  = 7.5 Hz, 2H), 6.22 (d,  $J$  = 10.5 Hz, 1H), 4.50 – 4.40 (m, 1H), 4.40 – 4.23 (m, 3H), 4.17 (s, 1H).  $^{13}\text{C}$  NMR (101 MHz,  $\text{CD}_2\text{Cl}_2$ )  $\delta$  184.1, 151.5, 143.2, 138.7, 137.2, 133.2, 131.6, 131.0, 130.4, 128.8, 128.2, 128.04, 127.98, 127.9, 127.5, 126.5, 125.9, 119.0, 77.2, 66.2, 65.0, 56.7. IR (neat): 2913, 1668, 1301, 1043, 1005, 948  $\text{cm}^{-1}$ . HRMS (ESI)  $m/z$  calcd for  $\text{C}_{26}\text{H}_{21}\text{O}_4^+$   $[\text{M}+\text{H}]^+$  397.1434, found 397.1429.

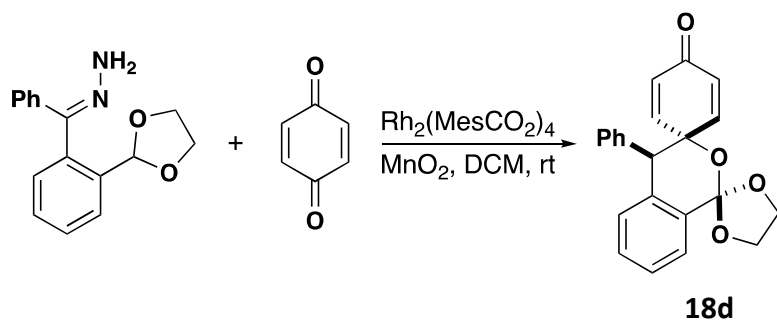

(*S*)-4'-Phenyldispiro[cyclohexane-1,3'-isochromane-1',2''-[1,3]dioxolane]-2,5-dien-4-one was synthesized according to General Procedure G, using (*E*)-((2-(1,3-dioxolan-2-yl)phenyl)(phenyl)methylene)hydrazine (26.8 mg, 0.1 mmol), benzoquinone (13.0 mg, 0.12 mmol),  $\text{MnO}_2$  (69.6 mg, 0.8 mmol),  $\text{Rh}_2(\text{MesCO}_2)_4$  (0.9 mg, 0.001 mmol) and DCM (6 mL). The crude product was purified by flash column chromatography (hexane/EtOAc = 7:1, v/v) to obtain **18d** as a white solid (32.5 mg, 94%). m.p. 198-200  $^\circ\text{C}$ .  $^1\text{H}$  NMR (400 MHz,  $\text{CDCl}_3$ )  $\delta$  7.55 (d,  $J$  = 7.6 Hz, 1H), 7.39 – 7.20 (m, 6H), 7.19 – 7.10 (m, 2H), 6.96 (d,  $J$  = 7.6 Hz, 1H), 6.54 (dd,  $J$  = 10.5, 3.2 Hz, 1H), 6.18 – 6.02 (m, 2H), 4.40 – 4.32 (m, 1H), 4.32 – 4.23 (m, 3H), 4.10 (s, 1H).  $^{13}\text{C}$  NMR (101 MHz,  $\text{CDCl}_3$ )  $\delta$  185.2, 148.9, 147.8, 138.8, 137.0, 131.5, 130.3, 130.2, 128.79, 128.76, 128.5, 128.3, 127.8, 127.7, 127.2, 117.9, 74.0, 65.7, 64.9, 52.9. IR (neat): 2910, 1669, 1631, 1322, 1004, 949  $\text{cm}^{-1}$ . HRMS (ESI)  $m/z$  calcd for  $\text{C}_{22}\text{H}_{19}\text{O}_4^+$   $[\text{M}+\text{H}]^+$  347.1278, found 347.1282.

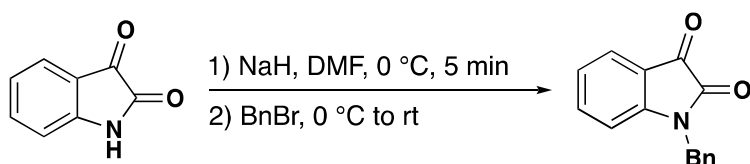

To a flame-dried round bottom flask were added indoline-2,3-dione (441.4 mg, 3 mmol) and DMF (15 mL). NaH (60%, 144 mg, 3.6 mmol) was added at 0  $^\circ\text{C}$ . After the mixture was stirred at 0  $^\circ\text{C}$  for 5 min, (bromomethyl)benzene (0.39 mL, 3.3 mmol) was added. The reaction was then

stirred for another 30 min. After quenched with saturated  $\text{NH}_4\text{Cl}$  aqueous, the reaction was extracted with EtOAc ( $3 \times 10$  mL). The combined organic phases were washed with  $\text{H}_2\text{O}$  ( $1 \times 10$  mL) and brine ( $1 \times 10$  mL). The organic phase was dried over anhydrous  $\text{Na}_2\text{SO}_4$ , filtered and concentrated. The residue was further purified by flash column chromatography (hexane/EtOAc = 3:1, v/v) to obtain the product as an orange solid (632.0 mg, 89%).  $^1\text{H}$  NMR (400 MHz,  $\text{CDCl}_3$ )  $\delta$  7.61 (d,  $J = 7.5$  Hz, 1H), 7.48 (td,  $J = 7.8, 1.4$  Hz, 1H), 7.41 – 7.27 (m, 5H), 7.09 (t,  $J = 7.4$  Hz, 1H), 6.78 (d,  $J = 7.9$  Hz, 1H), 4.93 (s, 2H).  $^1\text{H}$  NMR data was consistent with reported literature values.<sup>10</sup>

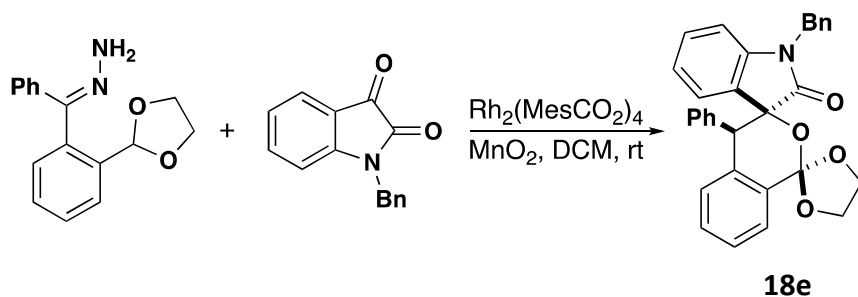

(3*R*,4'*S*)-1-Benzyl-4'-phenyldispiro[indoline-3,3'-isochromane-1',2''-[1,3]dioxolan]-2-one was synthesized according to General Procedure G, using (*E*)-((2-(1,3-dioxolan-2-yl)phenyl)(phenyl)methylene)hydrazine (26.8 mg, 0.1 mmol), 1-benzylindoline-2,3-dione (28.5 mg, 0.12 mmol),  $\text{MnO}_2$  (69.6 mg, 0.8 mmol),  $\text{Rh}_2(\text{MesCO}_2)_4$  (0.9 mg, 0.001 mmol) and DCM (6 mL). The crude product was purified by flash column chromatography (DCM/EtOAc = 5:1, v/v) to obtain **18e** as a white solid (45.8 mg, 96%, >95:5 dr). m.p. 178-180 °C.  $^1\text{H}$  NMR (400 MHz,  $\text{CDCl}_3$ )  $\delta$  7.69 (dd,  $J = 7.7, 1.4$  Hz, 1H), 7.42 (t,  $J = 7.5$  Hz, 2H), 7.37 – 7.26 (m, 3H), 7.16 – 7.01 (m, 4H), 6.94 (d,  $J = 7.8$  Hz, 2H), 6.78 (td,  $J = 7.6, 1.0$  Hz, 1H), 6.62 (dd,  $J = 7.6, 1.3$  Hz, 1H), 6.45 (d,  $J = 7.0$  Hz, 2H), 6.37 (s, 1H), 6.30 (d,  $J = 7.8$  Hz, 1H), 5.20 (s, 1H), 5.04 (d,  $J = 16.0$  Hz, 1H), 4.52 – 4.42 (m, 1H), 4.35 – 4.17 (m, 4H).  $^{13}\text{C}$  NMR (101 MHz,  $\text{CDCl}_3$ )  $\delta$  173.9, 143.2, 136.7, 135.0, 134.5, 133.6, 133.5, 129.9, 129.7, 129.4, 129.1, 128.7, 127.9, 127.7, 127.44, 127.42, 127.2, 126.5, 126.3, 125.5, 122.5, 118.5, 109.5, 81.6, 65.5, 64.7, 50.0, 43.9. IR (neat): 2922, 1726, 1608, 1466, 1364, 1318, 1066, 987, 752  $\text{cm}^{-1}$ . HRMS (ESI)  $m/z$  calcd for  $\text{C}_{31}\text{H}_{26}\text{NO}_4^+$   $[\text{M}+\text{H}]^+$  476.1856, found 476.1874.

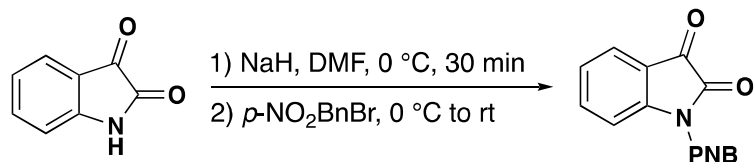

To a flame-dried round bottom flask were added indoline-2,3-dione (735.7 mg, 5 mmol) and DMF (10 mL). NaH (60%, 220 mg, 5.5 mmol) was added at 0 °C. After the mixture was stirred at 0 °C for 30 min, 1-(bromomethyl)-4-nitrobenzene (1.3 g, 6 mmol) was added. The reaction was then allowed to warm to room temperature and stirred overnight. After quenched with H<sub>2</sub>O, an orange solid precipitated. It was then collected and washed with H<sub>2</sub>O and EtOAc. After dried under reduced pressure, the product was obtained as an orange solid (820.9 mg, 58%). <sup>1</sup>H NMR (400 MHz, CDCl<sub>3</sub>) δ 8.23 (d, *J* = 8.7 Hz, 2H), 7.67 (dd, *J* = 7.5, 1.4 Hz, 1H), 7.59 – 7.45 (m, 3H), 7.16 (t, *J* = 7.6 Hz, 1H), 6.72 (d, *J* = 7.9 Hz, 1H), 5.04 (s, 2H). <sup>1</sup>H NMR data was consistent with reported literature values.<sup>11</sup>

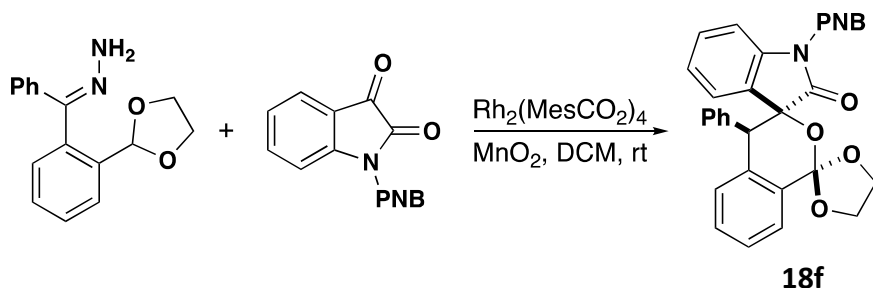

(3*S*,4'*R*)-1-(4-Nitrobenzoyl)-4'-phenyldispiro[indoline-3,3'-isochromane-1',2''-[1,3]dioxolan]-2-one was synthesized according to General Procedure G, using (*E*)-((2-(1,3-dioxolan-2-yl)phenyl)(phenyl)methylene)hydrazine (26.8 mg, 0.1 mmol), 1-(4-nitrobenzyl)indoline-2,3-dione (33.9 mg, 0.12 mmol), MnO<sub>2</sub> (69.6 mg, 0.8 mmol), Rh<sub>2</sub>(MesCO<sub>2</sub>)<sub>4</sub> (0.9 mg, 0.001 mmol) and DCM (6 mL). The crude product was purified by flash column chromatography (DCM) to obtain **18f** as a pale yellow solid (45.6 mg, 88%, >95:5 dr). m.p. 261-263 °C. <sup>1</sup>H NMR (400 MHz, CDCl<sub>3</sub>) δ 7.92 (d, *J* = 8.2 Hz, 2H), 7.70 (d, *J* = 7.7 Hz, 1H), 7.53 – 7.30 (m, 5H), 7.08 (t, *J* = 7.7 Hz, 1H), 6.99 (s, 1H), 6.92 (d, *J* = 7.7 Hz, 1H), 6.84 (t, *J* = 7.6 Hz, 1H), 6.65 (d, *J* = 7.5 Hz, 1H), 6.50 (d, *J* = 8.3 Hz, 2H), 6.36 (s, 1H), 6.22 (d, *J* = 7.9 Hz, 1H), 5.32 – 5.09 (m, 2H), 4.58 – 4.41 (m, 1H), 4.41 – 4.16 (m, 4H). <sup>13</sup>C NMR (101 MHz, CDCl<sub>3</sub>) δ 174.0, 147.3, 142.6, 142.5, 136.4, 134.4, 133.6, 130.1, 129.8, 129.5, 129.2, 128.1, 127.9, 127.6, 127.3, 127.2, 126.6, 125.5, 124.0, 123.0, 118.5,



108.9, 81.5, 65.5, 64.8, 50.0, 43.3. IR (neat): 2890, 1729, 1519, 1340, 1066, 751, 709  $\text{cm}^{-1}$ . HRMS (ESI)  $m/z$  calcd for  $\text{C}_{31}\text{H}_{25}\text{N}_2\text{O}_6^+$   $[\text{M}+\text{H}]^+$  521.1707, found 521.1709.

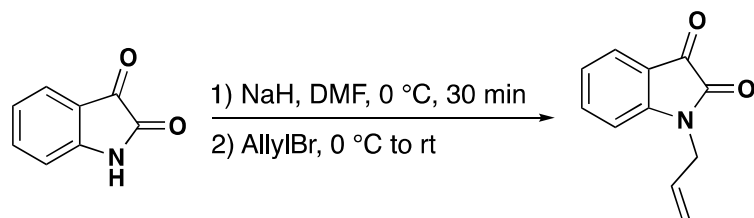

To a flame-dried round bottom flask were added indoline-2,3-dione (735.7 mg, 5 mmol) and DMF (10 mL). NaH (60%, 220 mg, 5.5 mmol) was added at 0 °C. After the mixture was stirred at 0 °C for 30 min, 3-bromoprop-1-ene (0.52 mL, 6 mmol) was added. The reaction was then allowed to warm to room temperature and stirred overnight. After quenched with  $\text{H}_2\text{O}$ , the reaction was extracted with EtOAc (3  $\times$  10 mL). The combined organic phases were washed with  $\text{H}_2\text{O}$  (1  $\times$  10 mL) and brine (1  $\times$  10 mL). The organic phase was dried over anhydrous  $\text{Na}_2\text{SO}_4$ , filtered and concentrated. The residue was further purified by flash column chromatography (hexane/EtOAc = 2:1, v/v) to obtain the product as a red solid (812.1 mg, 87%).  $^1\text{H}$  NMR (400 MHz,  $\text{CDCl}_3$ )  $\delta$  7.62 (dd,  $J$  = 7.3, 1.3 Hz, 1H), 7.57 (td,  $J$  = 7.8, 1.4 Hz, 1H), 7.13 (td,  $J$  = 7.6, 0.9 Hz, 1H), 6.90 (d,  $J$  = 7.9 Hz, 1H), 5.85 (ddt,  $J$  = 17.2, 10.5, 5.4 Hz, 1H), 5.42 – 5.26 (m, 2H), 4.42 – 4.31 (m, 2H).  $^1\text{H}$  NMR data was consistent with reported literature values.<sup>12</sup>

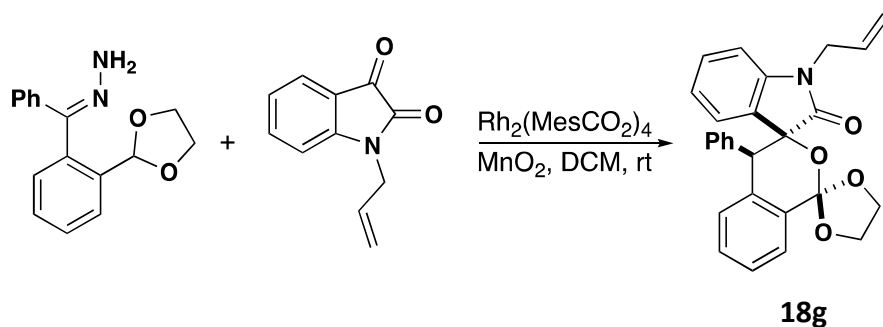

(3*S*,4'*R*)-1-Allyl-4'-phenyldispiro[indoline-3,3'-isochromane-1',2''-[1,3]dioxolan]-2-one was synthesized according to General Procedure G, using (*E*)-((2-(1,3-dioxolan-2-yl)phenyl)(phenyl)methylene)hydrazine (26.8 mg, 0.1 mmol), 1-allylindoline-2,3-dione (22.5 mg, 0.12 mmol),  $\text{MnO}_2$  (69.6 mg, 0.8 mmol),  $\text{Rh}_2(\text{MesCO}_2)_4$  (0.9 mg, 0.001 mmol) and DCM (6 mL). The crude product was purified by flash column chromatography (DCM/EtOAc = 15:1, v/v) to obtain **18g** as a pale yellow solid (38.0 mg, 89%, >95:5 dr). m.p. 175-176 °C.  $^1\text{H}$  NMR (400 MHz,

CD<sub>2</sub>Cl<sub>2</sub>)  $\delta$  7.66 (dd,  $J$  = 7.7, 1.4 Hz, 1H), 7.43 (t,  $J$  = 7.6 Hz, 1H), 7.40 – 7.08 (m, 5H), 6.92 (d,  $J$  = 7.8 Hz, 2H), 6.80 (td,  $J$  = 7.6, 1.0 Hz, 1H), 6.67 (dd,  $J$  = 7.6, 1.3 Hz, 1H), 6.52 (d,  $J$  = 7.8 Hz, 1H), 6.33 (s, 1H), 5.32 – 5.21 (m, 1H), 4.97 (s, 1H), 4.84 (dd,  $J$  = 10.4, 1.4 Hz, 1H), 4.44 – 4.33 (m, 2H), 4.33 – 4.16 (m, 4H), 3.79 (ddt,  $J$  = 16.6, 5.4, 1.7 Hz, 1H). <sup>13</sup>C NMR (101 MHz, CD<sub>2</sub>Cl<sub>2</sub>)  $\delta$  173.3, 143.6, 136.9, 134.9, 133.8, 131.07, 131.05, 130.1, 129.9, 128.1, 127.72, 127.65, 127.0, 126.8, 126.3, 122.3, 118.8, 116.8, 109.3, 81.8, 65.6, 65.2, 50.6, 42.4. IR (neat): 2903, 1728, 1609, 1369, 1177, 1063, 1020, 750, 713 cm<sup>-1</sup>. HRMS (ESI)  $m/z$  calcd for C<sub>27</sub>H<sub>24</sub>NO<sub>4</sub><sup>+</sup> [M+H]<sup>+</sup> 426.1700, found 426.1706.

#### Scale-up reaction

To a flame-dried round bottom flask were added (*E*)-((2-(1,3-dioxolan-2-yl)phenyl)(phenyl)methylene)hydrazine (134.2 mg, 0.5 mmol), 1-allylindoline-2,3-dione (112.3 mg, 0.6 mmol), MnO<sub>2</sub> (347.8 mg, 4.0 mmol), Rh<sub>2</sub>(MesCO<sub>2</sub>)<sub>4</sub> (4.3 mg, 0.005 mmol) and DCM (30 mL). After filtration of MnO<sub>2</sub>, the reaction was concentrated. dr was determined as >95:5 by <sup>1</sup>H NMR of residue. After flash column chromatography (DCM/EtOAc = 15:1, v/v), the desired product was obtained as a pale yellow solid (201.1 mg, 95%, >95:5 dr).

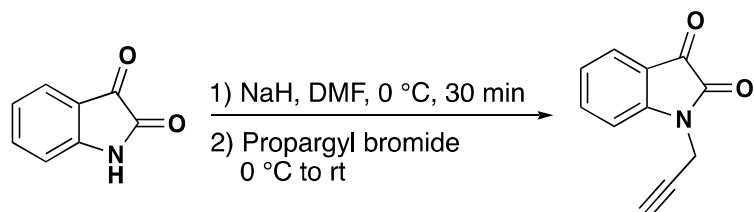

To a flame-dried round bottom flask were added indoline-2,3-dione (735.7 mg, 5 mmol) and DMF (10 mL). NaH (60%, 220 mg, 5.5 mmol) was added at 0 °C. After the mixture was stirred at 0 °C for 30 min, 3-bromoprop-1-yne (80% in toluene, 892.2 mg, 6 mmol) was added. The reaction was then allowed to warm to room temperature and stirred overnight. After quenched with H<sub>2</sub>O, the reaction was extracted with EtOAc (3 × 10 mL). The combined organic phases were washed with H<sub>2</sub>O (1 × 10 mL) and brine (1 × 10 mL). The organic phase was dried over anhydrous Na<sub>2</sub>SO<sub>4</sub>, filtered and concentrated. The residue was further purified by flash column chromatography (hexane/EtOAc = 1:1, v/v) to obtain the product as an orange solid (825.3 mg, 89%). <sup>1</sup>H NMR (400 MHz, CDCl<sub>3</sub>)  $\delta$  7.71 – 7.60 (m, 2H), 7.19 (dd,  $J$  = 7.5, 0.9 Hz, 1H), 7.14 (dd,  $J$  =

8.3, 0.9 Hz, 1H), 4.54 (d,  $J = 2.6$  Hz, 2H), 2.31 (s, 1H).  $^1\text{H}$  NMR data was consistent with reported literature values.<sup>13</sup>

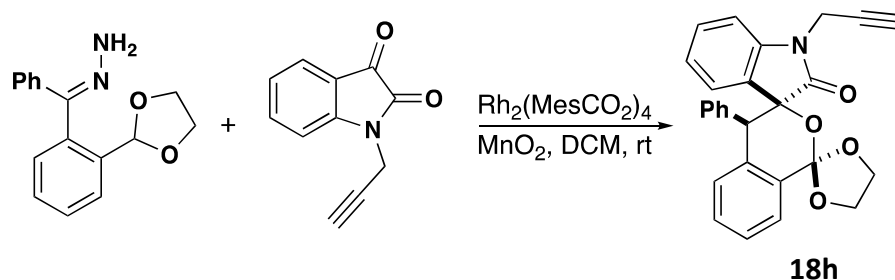

(3*S*,4'*R*)-4'-Phenyl-1-(prop-2-yn-1-yl)dispiro[indoline-3,3'-isochromane-1',2''-[1,3]dioxolan]-2-one was synthesized according to General Procedure G, using (*E*)-((2-(1,3-dioxolan-2-yl)phenyl)(phenyl)methylene)hydrazine (26.8 mg, 0.1 mmol), 1-(prop-2-yn-1-yl)indoline-2,3-dione (22.2 mg, 0.12 mmol),  $\text{MnO}_2$  (69.6 mg, 0.8 mmol),  $\text{Rh}_2(\text{MesCO}_2)_4$  (0.9 mg, 0.001 mmol) and DCM (6 mL). The crude product was purified by flash column chromatography (DCM/EtOAc = 5:1, v/v) to obtain **18h** as a white solid (36.4 mg, 86%, >95:5 dr). m.p. 199-201 °C.  $^1\text{H}$  NMR (400 MHz,  $\text{CDCl}_3$ )  $\delta$  7.68 (dd,  $J = 7.8, 1.4$  Hz, 1H), 7.41 (t,  $J = 7.6$  Hz, 1H), 7.32 (td,  $J = 7.6, 1.4$  Hz, 1H), 7.29 – 7.15 (m, 3H), 7.12 (t,  $J = 8.0$  Hz, 1H), 6.98 (d,  $J = 7.8$  Hz, 1H), 6.90 (s, 1H), 6.84 (t,  $J = 7.6$  Hz, 1H), 6.72 (d,  $J = 7.8$  Hz, 1H), 6.62 (d,  $J = 7.6$  Hz, 1H), 6.33 (s, 1H), 5.00 (s, 1H), 4.48 – 4.40 (m, 1H), 4.33 – 4.20 (m, 3H), 4.20 – 4.08 (m, 2H), 1.99 (t,  $J = 2.5$  Hz, 1H).  $^{13}\text{C}$  NMR (101 MHz,  $\text{CDCl}_3$ )  $\delta$  172.9, 141.9, 136.3, 134.3, 133.4, 129.9, 129.7, 127.7, 127.5, 127.4, 126.9, 126.4, 125.7, 122.7, 118.4, 109.0, 81.7, 76.3, 72.1, 65.4, 64.8, 50.3, 29.0. IR (neat): 2891, 1728, 1609, 1466, 1066, 987, 753, 708  $\text{cm}^{-1}$ . HRMS (ESI)  $m/z$  calcd for  $\text{C}_{27}\text{H}_{22}\text{NO}_4^+$   $[\text{M}+\text{H}]^+$  424.1543, found 424.1548.

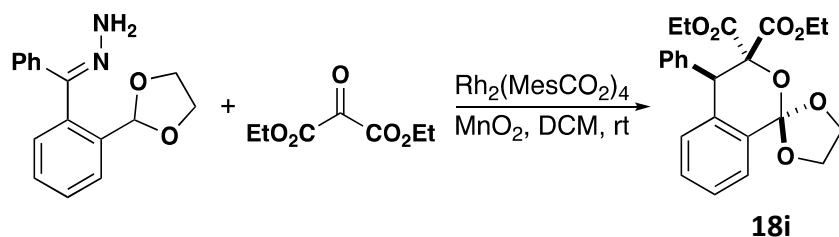

Diethyl (*S*)-4-phenylspiro[isochromane-1,2'-[1,3]dioxolane]-3,3-dicarboxylate was synthesized according to General Procedure H, using (*E*)-((2-(1,3-dioxolan-2-yl)phenyl)(phenyl)methylene)hydrazine (26.8 mg, 0.1 mmol), diethyl 2-oxomalonate (18  $\mu\text{L}$ , 0.12 mmol),  $\text{MnO}_2$  (69.6 mg, 0.8 mmol),  $\text{Rh}_2(\text{MesCO}_2)_4$  (0.9 mg, 0.001 mmol) and DCM (6 mL).

The crude product was purified by flash column chromatography (DCM/EtA = 5:1, v/v) to obtain **18i** as a white solid (32.9 mg, 80%). m.p. 149-151 °C. <sup>1</sup>H NMR (400 MHz, CD<sub>2</sub>Cl<sub>2</sub>) δ 7.45 – 7.40 (m, 1H), 7.34 – 7.26 (m, 2H), 7.26 – 7.12 (m, 5H), 7.10 – 7.02 (m, 1H), 4.72 (s, 1H), 4.60 – 4.50 (m, 1H), 4.36 – 4.18 (m, 4H), 4.16 – 4.07 (m, 1H), 4.04 – 3.93 (m, 1H), 3.89 – 3.78 (m, 1H), 1.25 (t, *J* = 7.0 Hz, 3H), 1.07 (t, *J* = 7.1 Hz, 3H). <sup>13</sup>C NMR (101 MHz, CD<sub>2</sub>Cl<sub>2</sub>) δ 168.7, 166.4, 139.7, 138.2, 130.6, 130.0, 129.8, 129.1, 128.6, 127.8, 127.4, 126.9, 118.6, 83.4, 66.9, 64.6, 62.4, 62.1, 46.7, 14.03, 13.99. IR (neat): 2918, 1774, 1745, 1241, 1066, 1046 cm<sup>-1</sup>. HRMS (ESI) *m/z* calcd for C<sub>23</sub>H<sub>25</sub>O<sub>7</sub><sup>+</sup> [M+H]<sup>+</sup> 413.1595, found 413.1585.

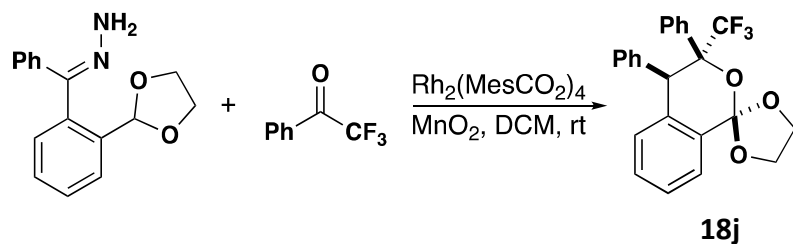

(3*R*,4*S*)-3,4-Diphenyl-3-(trifluoromethyl)spiro[isochromane-1,2'-[1,3]dioxolane] was synthesized according to General Procedure G, using (*E*)-((2-(1,3-dioxolan-2-yl)phenyl)(phenyl)methylene)hydrazine (26.8 mg, 0.1 mmol), 2,2,2-trifluoro-1-phenylethan-1-one (17 μL, 0.12 mmol), MnO<sub>2</sub> (69.6 mg, 0.8 mmol), Rh<sub>2</sub>(MesCO<sub>2</sub>)<sub>4</sub> (0.9 mg, 0.001 mmol) and DCM (6 mL). The crude product was purified by flash column chromatography (DCM/hexane = 1:1, v/v) to obtain **18j** as a white solid (19.6 mg, 48%, >95:5 dr). m.p. 133-135 °C. <sup>1</sup>H NMR (400 MHz, CDCl<sub>3</sub>) δ 7.59 – 7.52 (m, 1H), 7.45 (d, *J* = 7.5 Hz, 2H), 7.33 – 7.26 (m, 2H), 7.20 – 7.09 (m, 6H), 7.06 – 6.98 (m, 2H), 6.98 – 6.92 (m, 1H), 4.77 (s, 1H), 4.67 – 4.59 (m, 1H), 4.58 – 4.49 (m, 1H), 4.46 – 4.36 (m, 2H). <sup>19</sup>F NMR (376 MHz, CDCl<sub>3</sub>) δ -72.61. <sup>13</sup>C NMR (101 MHz, CDCl<sub>3</sub>) δ 139.9, 137.0, 136.4, 130.1, 129.9, 129.7, 128.3, 128.2, 128.0, 127.5 (q, <sup>3</sup>*J*<sub>C-F</sub> = 2 Hz), 127.4, 127.3, 126.8, 126.7, 125.0 (q, <sup>1</sup>*J*<sub>C-F</sub> = 290 Hz), 118.6, 81.5 (q, <sup>2</sup>*J*<sub>C-F</sub> = 30 Hz), 65.7, 64.8, 47.3. IR (neat): 2905, 1333, 1240, 1150, 1015, 948, 756, 700, 691 cm<sup>-1</sup>. HRMS (ESI) *m/z* calcd for C<sub>24</sub>H<sub>20</sub>F<sub>3</sub>O<sub>3</sub><sup>+</sup> [M+H]<sup>+</sup> 413.1359, found 413.1363.

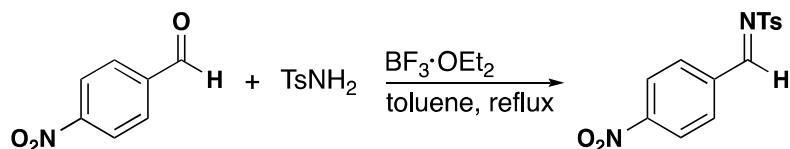

To a flame-dried round bottom flask equipped were added 4-nitrobenzaldehyde (1.96 g, 13 mmol), 4-methylbenzenesulfonamide (1.7 g, 10 mmol) and toluene (30 mL). After  $\text{BF}_3 \cdot \text{OEt}_2$  was added at room temperature, the mixture was stirred in refluxing toluene with a Dean-Stark trap overnight. After completion of the reaction monitored by TLC, the reaction was allowed to cool down to room temperature, and solid precipitated. The solid was collected and washed with hexane and DCM. After dried under reduced pressure, the desired product was obtained as a pale yellow solid (2.7 g, 89%).  $^1\text{H}$  NMR (400 MHz,  $\text{CDCl}_3$ )  $\delta$  9.11 (s, 1H), 8.33 (d,  $J$  = 8.8 Hz, 2H), 8.17 – 8.03 (m, 2H), 7.91 (d,  $J$  = 8.3 Hz, 2H), 7.38 (d,  $J$  = 7.9 Hz, 2H), 2.46 (s, 3H).  $^1\text{H}$  NMR data was consistent with reported literature values.<sup>14</sup>

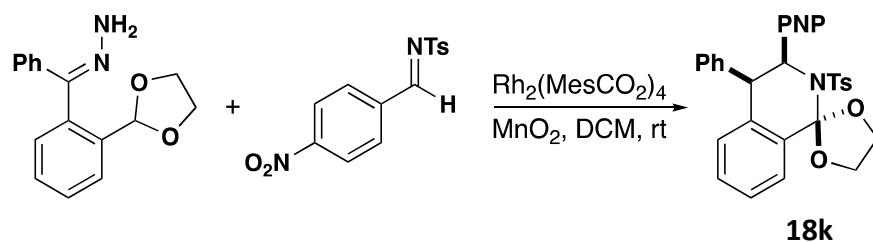

(3*R*,4*S*)-3-(4-Nitrophenyl)-4-phenyl-2-tosyl-3,4-dihydro-2*H*-spiro[isoquinoline-1,2'-

[1,3]dioxolane] was synthesized according to General Procedure H, using (*E*)-((2-(1,3-dioxolan-2-yl)phenyl)(phenyl)methylene)hydrazine (26.8 mg, 0.1 mmol), (*E*)-4-methyl-*N*-(4-nitrobenzylidene)benzenesulfonamide (36.5 mg, 0.12 mmol),  $\text{MnO}_2$  (69.6 mg, 0.8 mmol),  $\text{Rh}_2(\text{MesCO}_2)_4$  (0.9 mg, 0.001 mmol) and DCM (6 mL). The crude product was purified by flash column chromatography (hexane/DCM = 1:2 to 0:1, v/v) to obtain **18k** as a white solid (41.1 mg, 76%, 90:10 dr). m.p. 111-113 °C.  $^1\text{H}$  NMR (400 MHz,  $\text{CD}_2\text{Cl}_2$ )  $\delta$  7.69 (d,  $J$  = 8.8 Hz, 2H), 7.54 (dd,  $J$  = 7.8, 1.4 Hz, 1H), 7.41 – 7.33 (m, 1H), 7.33 – 7.25 (m, 3H), 7.25 – 7.15 (m, 3H), 7.01 (d,  $J$  = 8.1 Hz, 2H), 6.92 (d,  $J$  = 7.7 Hz, 1H), 6.68 (d,  $J$  = 7.2 Hz, 2H), 6.54 (d,  $J$  = 8.8 Hz, 2H), 5.51 (d,  $J$  = 5.5 Hz, 1H), 5.11 (d,  $J$  = 5.5 Hz, 1H), 4.74 (dt,  $J$  = 8.2, 6.8 Hz, 1H), 4.58 – 4.49 (m, 1H), 4.40 (ddd,  $J$  = 7.4, 6.6, 4.2 Hz, 1H), 3.94 (q,  $J$  = 7.7 Hz, 1H), 2.30 (s, 3H).  $^{13}\text{C}$  NMR (101 MHz,  $\text{CD}_2\text{Cl}_2$ )  $\delta$  147.6, 145.7, 143.8, 139.4, 138.2, 135.7, 134.7, 131.6, 130.9, 129.5, 129.1, 128.5, 128.4, 127.74, 127.71, 127.6, 123.5, 122.5, 114.1, 67.6, 64.8, 63.6, 50.2, 21.5. IR (neat): 2917, 1518, 1344, 1166, 1072, 949, 856, 707  $\text{cm}^{-1}$ . HRMS (ESI)  $m/z$  calcd for  $\text{C}_{30}\text{H}_{27}\text{N}_2\text{O}_6\text{S}^+$  [ $\text{M}+\text{H}$ ] $^+$  543.1584, found 543.1593.

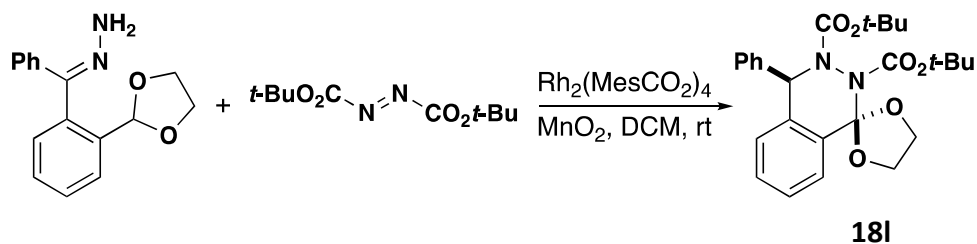

To a flame-dried round bottom flask were added (*E*)-((2-(1,3-dioxolan-2-yl)phenyl)(phenyl)methylene)hydrazine (53.7 mg, 0.2 mmol), di-*tert*-butyl (*E*)-diazene-1,2-dicarboxylate (55.3 mg, 0.24 mmol), MnO<sub>2</sub> (139.1 mg, 1.6 mmol), Rh<sub>2</sub>(MesCO<sub>2</sub>)<sub>4</sub> (1.7 mg, 0.002 mmol) and DCM (12 mL). The reaction was stirred at room temperature for 24 h. After filtration of MnO<sub>2</sub> over celite, the crude product was purified by flash column chromatography (hexane/EtOAc = 5:1, v/v) to obtain **18I** as a white solid (76.6 mg, 82%). m.p. 192-194 °C. <sup>1</sup>H NMR (500 MHz, DMSO, 353 K) δ 7.56 (d, *J* = 7.0 Hz, 1H), 7.46 – 7.26 (m, 5H), 7.19 – 7.09 (m, 2H), 7.05 (d, *J* = 7.5 Hz, 1H), 6.39 (s, 1H), 4.53 – 4.44 (m, 1H), 4.34 (s, 1H), 4.27 – 4.14 (m, 2H), 1.45 (s, 9H), 1.05 (s, 9H). <sup>13</sup>C NMR (126 MHz, DMSO, 353 K) δ 150.4, 139.1, 135.7, 132.2, 128.64, 128.58, 127.6, 127.1, 127.0, 126.3, 126.2, 110.0, 79.8, 79.1, 67.1, 64.9, 56.4, 27.6, 27.0. IR (neat): 2967, 1729, 1695, 1348, 1128, 1075, 932, 758, 709 cm<sup>-1</sup>. HRMS (ESI) *m/z* calcd for C<sub>26</sub>H<sub>33</sub>N<sub>2</sub>O<sub>6</sub><sup>+</sup> [M+H]<sup>+</sup> 469.2333, found 469.2336.

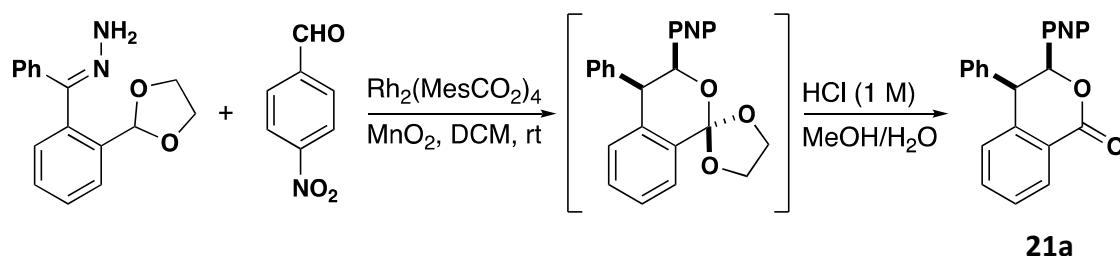

(3*R*,4*S*)-3-(4-Nitrophenyl)-4-phenylisochroman-1-one (**21a**). According to General Procedure G, Diels-Alder reaction was stirred for 24 h using (*E*)-((2-(1,3-dioxolan-2-yl)phenyl)(phenyl)methylene)hydrazine (26.8 mg, 0.1 mmol), 4-nitrobenzaldehyde (18.1 mg, 0.12 mmol), MnO<sub>2</sub> (69.6 mg, 0.8 mmol), Rh<sub>2</sub>(MesCO<sub>2</sub>)<sub>4</sub> (0.9 mg, 0.001 mmol) and DCM (6 mL). After filtrating MnO<sub>2</sub>, the solvent was removed under reduced pressure. The residue was dissolved in MeOH (2 mL) and H<sub>2</sub>O (0.4 mL). 1 M HCl (0.3 mL) was then added and the reaction was allowed to stir at room temperature for another 24 h. After quenched with sat. NaHCO<sub>3</sub> aq., the reaction was extracted with ethyl acetate (3 × 5 mL). The combined organic phase was washed with H<sub>2</sub>O (5 mL) and brine (5 mL), respectively. After dried over Na<sub>2</sub>SO<sub>4</sub>, the product

was purified by flash column chromatography (hexane/DCM = 1:5, v/v) as a white solid (17.9 mg, 52%, >95:5 dr). m.p. 220-222 °C. <sup>1</sup>H NMR (400 MHz, CDCl<sub>3</sub>) δ 8.31 (d, *J* = 7.9 Hz, 1H), 8.10 (d, *J* = 8.7 Hz, 2H), 7.63 (td, *J* = 7.5, 1.5 Hz, 1H), 7.54 (t, *J* = 7.6 Hz, 1H), 7.29 (t, *J* = 8.7 Hz, 3H), 7.18 – 7.02 (m, 3H), 6.63 (d, *J* = 7.2 Hz, 2H), 6.05 (d, *J* = 3.5 Hz, 1H), 4.38 (d, *J* = 3.5 Hz, 1H). <sup>13</sup>C NMR (101 MHz, CDCl<sub>3</sub>) δ 165.1, 147.7, 144.0, 141.7, 135.1, 134.9, 130.7, 129.3, 128.8, 128.5, 128.4, 127.9, 127.3, 124.9, 123.5, 81.3, 50.2. IR (neat): 2921, 1714, 1520, 1346, 1272, 1122, 1089 cm<sup>-1</sup>. HRMS (ESI) *m/z* calcd for C<sub>21</sub>H<sub>16</sub>NO<sub>4</sub><sup>+</sup> [M+H]<sup>+</sup> 346.1074, found 346.1076.

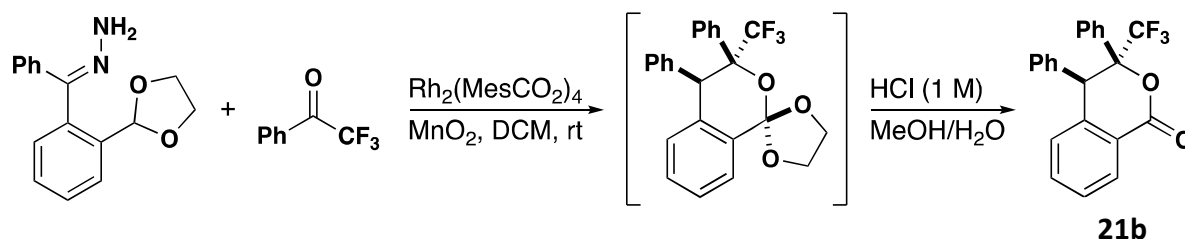

(3*R*,4*S*)-3,4-Diphenyl-3-(trifluoromethyl)isochroman-1-one (**21b**). According to General Procedure G, Diels-Alder reaction was stirred for 24 h using (*E*)-((2-(1,3-dioxolan-2-yl)phenyl)(phenyl)methylene)hydrazine (26.8 mg, 0.1 mmol), 2,2,2-trifluoro-1-phenylethan-1-one (17 μL, 0.12 mmol), MnO<sub>2</sub> (69.6 mg, 0.8 mmol), Rh<sub>2</sub>(MesCO<sub>2</sub>)<sub>4</sub> (0.9 mg, 0.001 mmol) and DCM (6 mL). After filtrating MnO<sub>2</sub>, the solvent was removed under reduced pressure. The residue was dissolved in MeOH (2 mL) and H<sub>2</sub>O (0.4 mL). 1 M HCl (0.3 mL) was then added and the reaction was allowed to stir at room temperature for another 20 h. After quenched with sat. NaHCO<sub>3</sub> aq., the reaction was extracted with ethyl acetate (3 × 5 mL). The combined organic phase was washed with H<sub>2</sub>O (5 mL) and brine (5 mL), respectively. After dried over Na<sub>2</sub>SO<sub>4</sub>, the product was purified by flash column chromatography (hexane/EtOAc = 5:1, v/v) as a white solid (20.5 mg, 56%, >95:5 dr). m.p. 164-166 °C. <sup>1</sup>H NMR (400 MHz, CDCl<sub>3</sub>) δ 8.24 (d, *J* = 7.8 Hz, 1H), 7.60 – 7.48 (m, 3H), 7.47 – 7.38 (m, 1H), 7.30 (d, *J* = 7.7 Hz, 1H), 7.25 – 7.13 (m, 3H), 7.08 – 6.96 (m, 3H), 6.96 – 6.85 (m, 2H), 4.91 (s, 1H). <sup>19</sup>F NMR (376 MHz, CDCl<sub>3</sub>) δ -72.89. <sup>13</sup>C NMR (201 MHz, CDCl<sub>3</sub>) δ 162.9, 140.1, 138.3, 135.0, 133.9, 130.2, 128.72, 128.71, 128.3, 128.2, 128.1, 127.4, 126.4, 124.6 (q, <sup>1</sup>*J*<sub>C-F</sub> = 286 Hz), 123.10, 85.9 (q, <sup>2</sup>*J*<sub>C-F</sub> = 28 Hz), 47.5. IR (neat): 2921, 1736, 1272, 1237, 1174, 1079, 714 cm<sup>-1</sup>. HRMS (ESI) *m/z* calcd for C<sub>22</sub>H<sub>16</sub>F<sub>3</sub>O<sub>2</sub><sup>+</sup> [M+H]<sup>+</sup> 369.1097, found 369.1101.

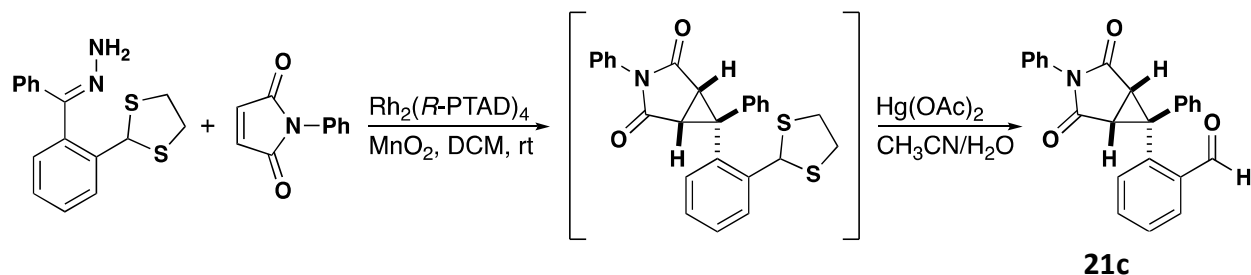

2-((1*R*,5*S*,6*s*)-2,4-dioxo-3,6-diphenyl-3-azabicyclo[3.1.0]hexan-6-yl)benzaldehyde (21c).

According to General Procedure G, Diels-Alder reaction was stirred for 5 h using (*E*)-((2-(1,3-dithiolan-2-yl)phenyl)(phenyl)methylene)hydrazine (30.0 mg, 0.1 mmol), 1-phenyl-1*H*-pyrrole-2,5-dione (20.8 mg, 0.12 mmol), MnO<sub>2</sub> (69.6 mg, 0.8 mmol), Rh<sub>2</sub>(*R*-PTAD)<sub>4</sub> (1.6 mg, 0.001 mmol) and DCM (6 mL). After filtrating MnO<sub>2</sub>, the solvent was removed under reduced pressure. The residue was dissolved in CH<sub>3</sub>CN (1 mL) and H<sub>2</sub>O (1 mL). Hg(OAc)<sub>2</sub> (79.7 mg, 0.25 mmol) was then added and the reaction was allowed to stir at room temperature for 24 h. After filtration over celite, the product was purified by flash column chromatography (hexane/EtOAc = 3:1, v/v) as a white solid (26.0 mg, 71%, >95:5 dr). m.p. 189-191 °C. <sup>1</sup>H NMR (400 MHz, CDCl<sub>3</sub>) δ 10.36 (s, 1H), 8.01 (dd, *J* = 7.5, 1.6 Hz, 1H), 7.75 (d, *J* = 7.6 Hz, 1H), 7.66 (td, *J* = 7.5, 1.6 Hz, 1H), 7.59 (t, *J* = 7.5 Hz, 1H), 7.35 – 7.18 (m, 6H), 7.14 (d, *J* = 6.8 Hz, 2H), 6.45 – 6.27 (m, 2H), 3.67 (d, *J* = 5.4 Hz, 1H), 3.24 (d, *J* = 5.3 Hz, 1H). <sup>13</sup>C NMR (101 MHz, CDCl<sub>3</sub>) δ 189.9, 171.8, 171.4, 140.1, 137.2, 135.5, 134.7, 132.1, 131.4, 130.9, 129.5, 129.2, 129.1, 128.7, 128.2, 126.4, 126.2, 46.3, 35.9, 35.5. IR (neat): 2736, 1697, 1495, 1392, 1185, 697 cm<sup>-1</sup>. HRMS (ESI) *m/z* calcd for C<sub>24</sub>H<sub>18</sub>NO<sub>3</sub><sup>+</sup> [M+H]<sup>+</sup> 368.1281, found 368.1283.

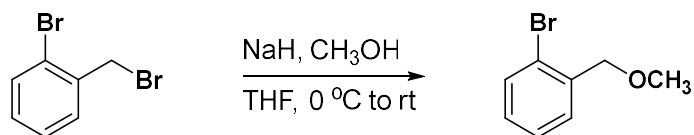

1-bromo-2-(methoxymethyl)benzene. Sodium Hydride 60% in an oil dispersion (1.200 g, 50.0 mmol) was suspended in THF under argon and cooled to 0 °C. Methanol (0.80 mL, 20.0 mmol) was added dropwise and allowed to react for 30 minutes. 2-bromo benzylbromide (2.4993 g, 10.0 mmol) was added in small portions and the reaction was allowed to warm up to room temperature overnight. The reaction was quenched by adding 10 mL of NH<sub>4</sub>Cl aq, extracted in diethyl ether (3 x 50 mL), washed with water (2 x 25 mL) and brine (2 x 25 mL), and dried the combined organic layers over Na<sub>2</sub>SO<sub>4</sub>. Removed solvent by rotatory evaporation and purified by



flash column chromatography (hexanes/ EtOAc = 100:0 to 90:10 v/v) to obtain a clear colorless oil (2.0092 g, 100%).  $^1\text{H NMR}$  (400 MHz,  $\text{CDCl}_3$ )  $\delta$  7.54 (dd,  $J = 7.9, 1.2$  Hz, 1H), 7.46 (dd,  $J = 7.7, 1.7$  Hz, 1H), 7.31 (d,  $J = 1.2$  Hz, 1H), 7.14 (td,  $J = 7.7, 1.8$  Hz, 1H), 4.53 (s, 2H), 3.47 (s, 3H).  $^1\text{H NMR}$  data was consistent with reported literature values.<sup>[15]</sup>

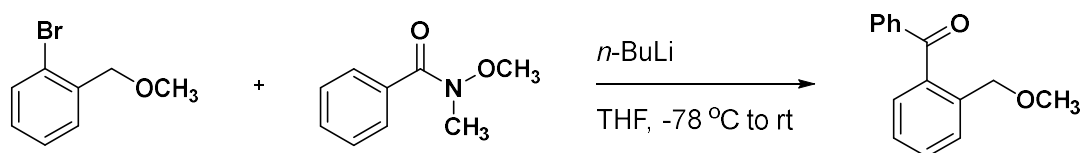

(2-(methoxymethyl)phenyl)(phenyl)methanone was synthesized according to General Procedure A, using 1-bromo-2-(methoxymethyl)benzene (1.0053 g, 5.0 mmol), *n*-BuLi (2.5 M, 2.4 mL, 6.0 mmol), *N*-methoxy-*N*-methylbenzamide (991.1 mg, 6.0 mmol) and THF (20 mL). The crude product was purified by flash column chromatography (hexane/EtOAc = 90:10, v/v) to obtain the ketone as a colorless oil (754.8 mg, 67%).  $^1\text{H NMR}$  (400 MHz,  $\text{CDCl}_3$ )  $\delta$  7.86 – 7.74 (m, 2H), 7.62 – 7.42 (m, 5H), 7.40 – 7.30 (m, 2H), 4.54 (s, 2H), 3.25 (s, 3H).  $^1\text{H NMR}$  data was consistent with reported literature values.<sup>16</sup>

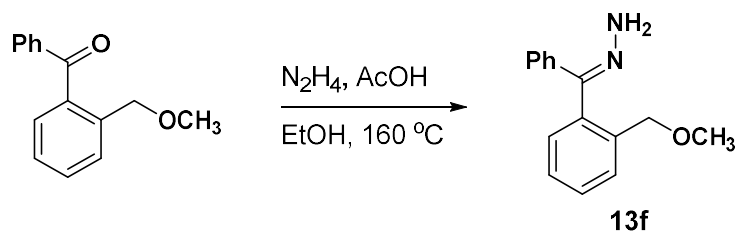

(*E*)-((2-(methoxymethyl)phenyl)(phenyl)methylene)hydrazine was synthesized according to General Procedure B, using (2-(methoxymethyl)phenyl)(phenyl)methanone (678.8 mg, 3.0 mmol),  $\text{N}_2\text{H}_4$  (1.17 mL, 39 mmol), HOAc (0.21 mL, 3.6 mmol) and EtOH (6.0 mL). The crude product was purified by flash column chromatography (hexane/EtOAc = 60:40, v/v) to obtain the hydrazone as a pale yellow oil (720.9 mg, 97%). Compound was isolated as a mixture of isomers;  $^1\text{H NMR}$  spectral data for this mixture is complex and the mixture was carried on to the next step.

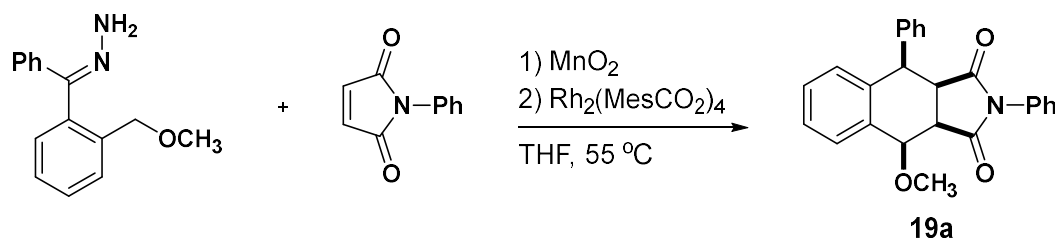

(3aR,4R,9R,9aR)-4-methoxy-2,9-diphenyl-3a,4,9,9a-tetrahydro-1H-benzo[f]isoindole-1,3(2H)-dione was synthesized according to General Procedure F, using (E)-((2-(methoxymethyl)phenyl)(phenyl)methylene)hydrazine (24.0 mg, 0.1 mmol), N-phenylmaleimide (17.3 mg, 0.1 mmol), MnO<sub>2</sub> (69.6 mg, 0.8 mmol), Rh<sub>2</sub>(MesCO<sub>2</sub>)<sub>4</sub> (0.9 mg, 0.001 mmol) and THF (6 mL). The crude product was purified by flash column chromatography (hexane/EtOAc = 70:30, v/v) to obtain **19a** as a yellowish solid (26.3 mg, 69%, >95:5 dr). m.p. 165-166 °C. <sup>1</sup>H NMR (400 MHz, CDCl<sub>3</sub>) δ 7.61 – 7.16 (m, 13H), 7.07 – 6.95 (m, 1H), 4.82 (d, *J* = 6.0 Hz, 1H), 4.69 (d, *J* = 7.9 Hz, 1H), 3.87 (dd, *J* = 9.7, 7.9 Hz, 1H), 3.70 (dd, *J* = 9.7, 6.0 Hz, 1H), 3.47 (s, 3H). <sup>13</sup>C NMR (101 MHz, CDCl<sub>3</sub>) δ 175.72, 174.57, 139.55, 138.42, 133.60, 132.00, 130.49, 129.19, 129.08, 128.89, 128.55, 128.02, 127.64, 127.03, 126.94, 126.64, 76.45, 56.90, 45.62, 44.60, 42.79. IR (neat): 2922, 1705, 1317, 1181, 1056, cm<sup>-1</sup>. HRMS (ESI) *m/z* calcd for C<sub>25</sub>H<sub>21</sub>NNaO<sub>3</sub><sup>+</sup> [M+Na]<sup>+</sup> 406.1414, found 406.1416.

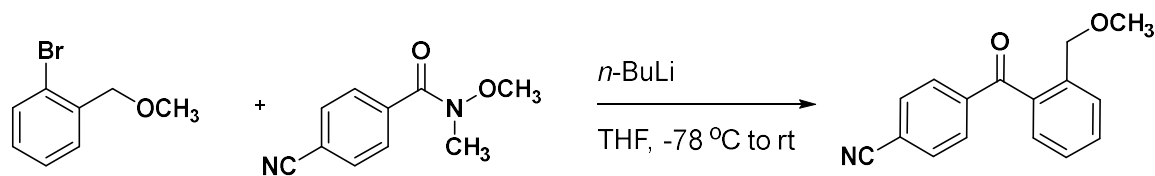

4-(2-(methoxymethyl)benzoyl)benzonitrile was synthesized according to General Procedure A, using 1-bromo-2-(methoxymethyl)benzene (1.0053 g, 5.0 mmol), *n*-BuLi (2.5 M, 2.4 mL, 6.0 mmol), 4-cyano-*N*-methoxy-*N*-methylbenzamide (1.1412 g, 6 mmol) and THF (20 mL). The crude product was purified by flash column chromatography (hexane/EtOAc = 85:15, v/v) to obtain the ketone as a yellowish oil (615.6 mg, 49%). <sup>1</sup>H NMR (400 MHz, CDCl<sub>3</sub>) δ 7.87 (d, *J* = 8.1 Hz, 2H), 7.76 (d, *J* = 8.0 Hz, 2H), 7.53 (dd, *J* = 3.8, 2.4 Hz, 2H), 7.45 – 7.29 (m, 2H), 4.52 (s, 2H), 3.21 (s, 3H). <sup>13</sup>C NMR (101 MHz, CDCl<sub>3</sub>) δ 196.37, 141.15, 138.47, 136.62, 132.34, 131.24, 130.25, 128.99, 128.73, 127.43, 118.15, 116.18, 72.33, 58.54. HRMS (ESI) *m/z* calcd for C<sub>16</sub>H<sub>14</sub>NO<sub>2</sub><sup>+</sup> [M+H]<sup>+</sup> 252.1019, found 252.1021.

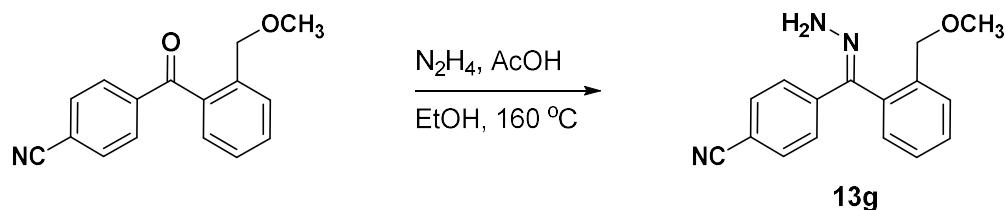

(E)-4-(hydrazineylidene(2-(methoxymethyl)phenyl)methyl)benzonitrile was synthesized according to General Procedure B, using 4-(2-(methoxymethyl)benzoyl)benzonitrile (502.6 mg, 2.0 mmol),  $\text{N}_2\text{H}_4$  (0.77 mL, 24 mmol), HOAc (0.15 mL, 2.4 mmol) and EtOH (4.0 mL). The crude product was purified by flash column chromatography (hexane/EtOAc = 60:40, v/v) to obtain the hydrazone as a pale yellow oil (60.8 mg, 11%). Compound was isolated as a mixture of isomers.  $^1\text{H}$  NMR spectral data for this mixture is complex and the mixture was carried on to the next step.

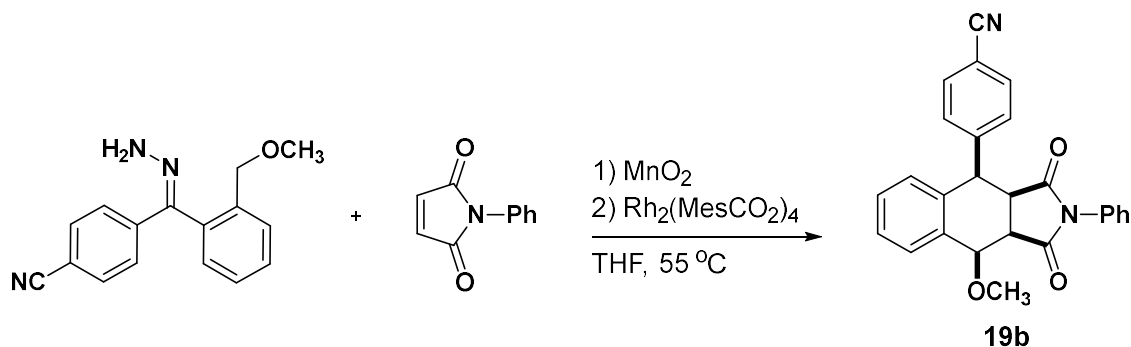

(3aR,4R,9R,9aR)-4-methoxy-2-phenyl-9-(p-tolyl)-3a,4,9,9a-tetrahydro-1H-benzo[f]isoindole-1,3(2H)-dione was synthesized according to General Procedure F, using (E)-4-(hydrazineylidene(2-(methoxymethyl)phenyl)methyl)benzonitrile (26.5 mg, 0.1 mmol), N-phenyl maleimide (17.3 mg, 0.1 mmol),  $\text{MnO}_2$  (69.6 mg, 0.8 mmol),  $\text{Rh}_2(\text{MesCO}_2)_4$  (0.9 mg, 0.001 mmol) and THF (6 mL). The crude product was purified by flash column chromatography (hexane/EtOAc = 70:30, v/v) to obtain **19b** as a white solid (31.3 mg, 77%, >95:5 dr). m.p. 160–162 °C.  $^1\text{H}$  NMR (400 MHz,  $\text{CDCl}_3$ )  $\delta$  7.62 – 7.48 (m, 4H), 7.49 – 7.30 (m, 6H), 7.15 (dd,  $J$  = 6.4, 2.5 Hz, 1H), 7.07 (dd,  $J$  = 8.4, 1.4 Hz, 2H), 4.95 – 4.75 (m, 2H), 3.91 (t,  $J$  = 9.7 Hz, 1H), 3.60 (dd,  $J$  = 10.0, 5.3 Hz, 1H), 3.37 (s, 3H).  $^{13}\text{C}$  NMR (101 MHz,  $\text{CDCl}_3$ )  $\delta$  175.54, 174.54, 146.19, 137.55, 133.22, 131.82, 131.65, 131.23, 129.91, 129.77, 129.23, 129.02, 128.77, 127.43, 126.52, 119.04, 110.72, 76.54, 56.50, 46.21, 44.43, 41.66. IR (neat): 2976, 2225, 1709, 1369, 1061  $\text{cm}^{-1}$ . HRMS (ESI)  $m/z$  calcd for  $\text{C}_{26}\text{H}_{20}\text{N}_2\text{NaO}_3^+$   $[\text{M}+\text{Na}]^+$  431.1366, found 431.13059.

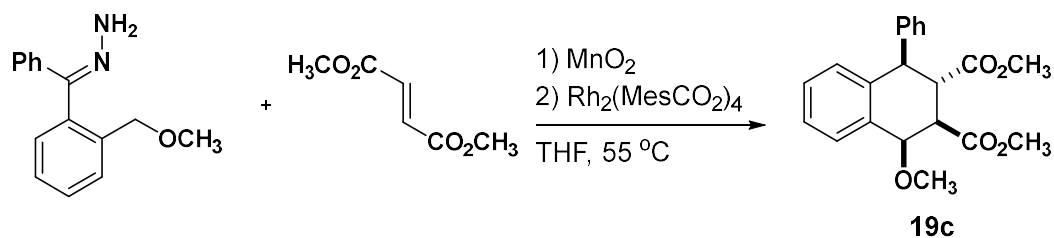

Dimethyl (1R,2R,3S,4R)-1-methoxy-4-phenyl-1,2,3,4-tetrahydronaphthalene-2,3-dicarboxylate was synthesized according to General Procedure F, using (E)-((2-(methoxymethyl)phenyl)(phenyl)methylene)hydrazine (24.0 mg, 0.1 mmol), dimethyl fumarate (14.4 mg, 0.1 mmol), MnO<sub>2</sub> (69.6 mg, 0.8 mmol), Rh<sub>2</sub>(MesCO<sub>2</sub>)<sub>4</sub> (0.9 mg, 0.001 mmol) and THF (6 mL). The crude product was purified by flash column chromatography (hexane/EtOAc = 80:20, v/v) to obtain **19c** as a clear colorless oil (30.8 mg, 87%, >95:5 dr). <sup>1</sup>H NMR (400 MHz, CDCl<sub>3</sub>) δ 7.33 – 7.09 (m, 8H), 6.91 – 6.80 (m, 1H), 4.70 (d, *J* = 2.9 Hz, 1H), 4.09 (d, *J* = 11.0 Hz, 1H), 3.76 (s, 3H), 3.61 (dd, *J* = 12.2, 11.0 Hz, 1H), 3.48 (s, 3H), 3.39 (s, 3H), 3.30 (dd, *J* = 12.1, 2.9 Hz, 1H). <sup>13</sup>C NMR (101 MHz, CDCl<sub>3</sub>) δ 175.93, 172.30, 143.77, 138.93, 133.30, 130.30, 129.85, 129.18, 128.65, 127.11, 126.03, 77.63, 57.04, 52.25, 51.68, 50.00, 48.42, 45.92. IR (neat): 2978, 2896 1717, 1375, 1249 cm<sup>-1</sup>. HRMS (ESI) *m/z* calcd for C<sub>21</sub>H<sub>22</sub>NaO<sub>5</sub><sup>+</sup> [M+Na]<sup>+</sup> 377.1365, found 377.1359.

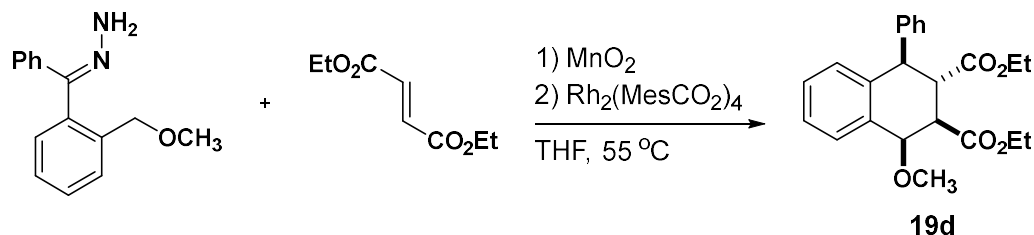

Diethyl (1R,2R,3S,4R)-1-methoxy-4-phenyl-1,2,3,4-tetrahydronaphthalene-2,3-dicarboxylate was synthesized according to General Procedure F, using (E)-((2-(methoxymethyl)phenyl)(phenyl)methylene)hydrazine (24.0 mg, 0.1 mmol), diethyl fumarate (17.2 mg, 0.1 mmol), MnO<sub>2</sub> (69.6 mg, 0.8 mmol), Rh<sub>2</sub>(MesCO<sub>2</sub>)<sub>4</sub> (0.9 mg, 0.001 mmol) and THF (6 mL). The crude product was purified by flash column chromatography (hexane/EtOAc = 80:20, v/v) to obtain **19d** as a clear colorless oil (32.5 mg, 85%, >95:5 dr). <sup>1</sup>H NMR (400 MHz, CDCl<sub>3</sub>) δ 7.34 – 7.12 (m, 8H), 6.88 – 6.82 (m, 1H), 4.70 (d, *J* = 2.9 Hz, 1H), 4.30 (dq, *J* = 10.8, 7.1 Hz, 1H), 4.16 (dq, *J* = 10.8, 7.1 Hz, 1H), 4.07 (d, *J* = 11.1 Hz, 1H), 4.02 – 3.86 (m, 2H), 3.58 (dd, *J* = 12.2, 11.1 Hz, 1H), 3.40 (s, 3H), 3.28 (dd, *J* = 12.1, 3.0 Hz, 1H), 1.29 (t, *J* = 7.1 Hz, 3H), 0.92 (t, *J* = 7.1 Hz,

3H).  $^{13}\text{C}$  NMR (101 MHz,  $\text{CDCl}_3$ )  $\delta$  175.39, 171.85, 143.66, 139.07, 133.38, 130.24, 129.82, 129.40, 129.10, 128.56, 127.04, 125.99, 77.82, 61.05, 60.35, 57.12, 50.14, 48.42, 45.84, 14.32, 13.95. IR (neat): 2980, 2897 1719, 1380, 1250  $\text{cm}^{-1}$ . HRMS (ESI)  $m/z$  calcd for  $\text{C}_{23}\text{H}_{26}\text{NaO}_5^+$   $[\text{M}+\text{Na}]^+$  405.1678, found 405.1673.

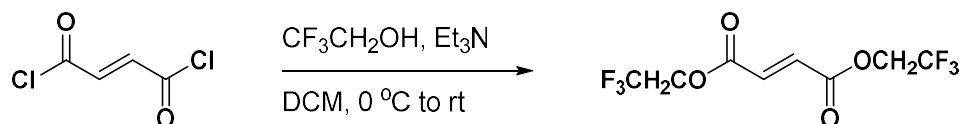

Bis(2,2,2-trifluoroethyl) fumarate was synthesized by dissolving 2,2,2-trifluoroethanol (0.57 mL, 8.0 mmol) in DCM (10 mL). After cooling to 0 °C, triethyl amine (1.59 mL, 12 mmol), and fumaryl chloride (0.42 mL, 4.0 mmol) were added dropwise. The black solution was allowed to warm up to room temperature overnight. Removed excess DCM by rotatory evaporation, dissolved in diethyl ether (50 mL), washed with brine (2 x 20 mL), dried over  $\text{Na}_2\text{SO}_4$  and removed excess solvent by rotatory evaporation. The crude product was purified by flash column chromatography (hexane/EtOAc = 60:40, v/v) to obtain bis(2,2,2-trifluoroethyl) fumarate as a white solid (923.2 mg, 82%).  $^1\text{H}$  NMR (400 MHz,  $\text{CDCl}_3$ )  $\delta$  7.01 (s, 2H), 4.61 (d,  $J$  = 8.2 Hz, 4H).  $^1\text{H}$  NMR data was consistent with reported literature values.<sup>17</sup>

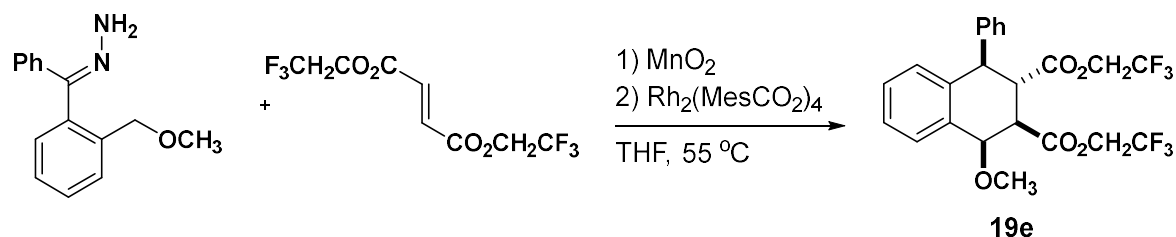

bis(2,2,2-trifluoroethyl) (1R,2R,3S,4R)-1-methoxy-4-phenyl-1,2,3,4-tetrahydronaphthalene-2,3-dicarboxylate was synthesized according to General Procedure F, using (E)-((2-methoxymethyl)phenyl)(phenyl)methylenehydrazine (24.0 mg, 0.1 mmol), bis(2,2,2-trifluoroethyl) fumarate (28.0 mg, 0.1 mmol),  $\text{MnO}_2$  (69.6 mg, 0.8 mmol),  $\text{Rh}_2(\text{MesCO}_2)_4$  (0.9 mg, 0.001 mmol) and THF (6 mL). The crude product was purified by flash column chromatography (hexane/EtOAc = 80:20, v/v) to obtain **19e** as a clear yellowish oil (36.5 mg, 74%, >95:5 dr).  $^1\text{H}$  NMR (400 MHz,  $\text{CDCl}_3$ )  $\delta$  7.37 – 7.21 (m, 6H), 7.16 – 7.11 (m, 2H), 6.87 (dd,  $J$  = 6.2, 2.9 Hz, 1H), 4.82 – 4.68 (m, 2H), 4.38 (dq,  $J$  = 12.7, 8.4 Hz, 1H), 4.26 (qd,  $J$  = 8.5, 1.7 Hz, 2H), 4.10 (d,  $J$  = 11.1

Hz, 1H), 3.77 (t,  $J = 11.6$  Hz, 1H), 3.43 (dd,  $J = 12.1, 3.0$  Hz, 1H), 3.39 (s, 3H).  $^{13}\text{C}$  NMR (101 MHz,  $\text{CDCl}_3$ )  $\delta$  173.48, 170.14, 142.63, 138.42, 132.30, 130.33, 129.96, 129.50, 129.08, 128.86, 128.65, 128.27, 128.15, 127.47, 127.37, 127.13, 126.23, 72.69, 61.02, 60.73, 60.65, 60.36, 56.78, 49.74, 48.30, 45.48.  $^{19}\text{F}$  NMR (376 MHz,  $\text{CDCl}_3$ )  $\delta$  -73.67 (t,  $J = 8.5$  Hz), -73.77 (t,  $J = 8.3$  Hz). IR (neat): 2990, 2905 1708, 1365, 1241  $\text{cm}^{-1}$ . HRMS (ESI)  $m/z$  calcd for  $\text{C}_{23}\text{H}_{20}\text{F}_6\text{NaO}_5^+$   $[\text{M}+\text{Na}]^+$  513.1113, found 513.1121.

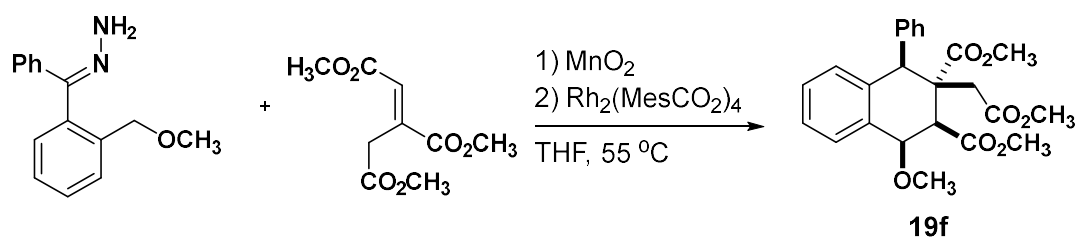

Dimethyl (1R,2S,3R,4R)-4-methoxy-2-(2-methoxy-2-oxoethyl)-1-phenyl-1,2,3,4-tetrahydronaphthalene-2,3-dicarboxylate was synthesized according to General Procedure F, using (E)-((2-(methoxymethyl)phenyl)(phenyl)methylene)hydrazine (24.0 mg, 0.1 mmol), trimethyl (E)-prop-1-ene-1,2,3-tricarboxylate (21.6 mg, 0.1 mmol),  $\text{MnO}_2$  (69.6 mg, 0.8 mmol),  $\text{Rh}_2(\text{MesCO}_2)_4$  (0.9 mg, 0.001 mmol) and THF (6 mL). The crude product was purified by flash column chromatography (hexane/EtOAc = 75:25, v/v) to obtain **19f** as a clear colorless oil (20.5 mg, 48%, >95:5 dr).  $^1\text{H}$  NMR (400 MHz,  $\text{CDCl}_3$ )  $\delta$  7.50 – 7.45 (m, 1H), 7.35 – 7.23 (m, 4H), 7.15 (ddd,  $J = 10.3, 6.8, 5.1$  Hz, 3H), 6.90 – 6.82 (m, 1H), 4.80 (s, 1H), 4.77 (d,  $J = 4.2$  Hz, 1H), 3.72 (d,  $J = 7.0$  Hz, 4H), 3.69 (s, 3H), 3.65 (s, 3H), 3.52 (s, 3H), 2.91 (d,  $J = 17.2$  Hz, 1H), 2.59 (d,  $J = 17.2$  Hz, 1H).  $^{13}\text{C}$  NMR (101 MHz,  $\text{CDCl}_3$ )  $\delta$  174.90, 171.74, 170.88, 139.73, 136.31, 135.88, 131.66, 129.46, 128.27, 127.77, 127.61, 127.37, 126.72, 76.99, 59.26, 53.60, 52.53, 51.98, 51.41, 50.35, 49.17, 37.37. IR (neat): 2978, 2896, 1717, 1705, 1375, 1249  $\text{cm}^{-1}$ . HRMS (ESI)  $m/z$  calcd for  $\text{C}_{24}\text{H}_{26}\text{NaO}_7^+$   $[\text{M}+\text{Na}]^+$  449.1576, found 449.1572.

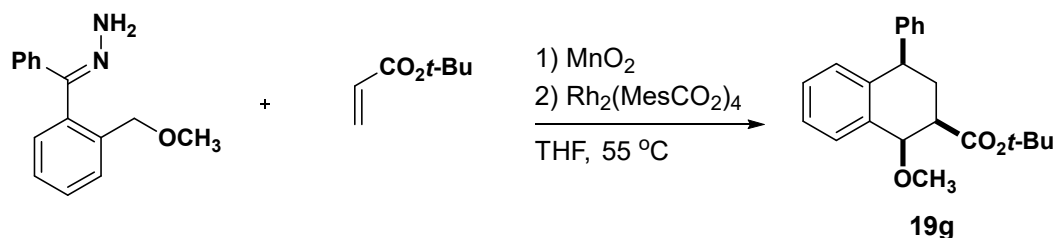

Tert-butyl (1R,2R,4R)-1-methoxy-4-phenyl-1,2,3,4-tetrahydronaphthalene-2-carboxylate was synthesized according to General Procedure F, using (E)-((2-(methoxymethyl)phenyl)(phenyl)methylene)hydrazine (24.0 mg, 0.1 mmol), *t*-butyl acrylate (12.8 mg, 0.1 mmol), MnO<sub>2</sub> (69.6 mg, 0.8 mmol), Rh<sub>2</sub>(MesCO<sub>2</sub>)<sub>4</sub> (0.9 mg, 0.001 mmol) and THF (6 mL). The crude product was purified by flash column chromatography (hexane/EtOAc = 90:10, v/v) to obtain **19g** as a clear colorless oil (10.9 mg, 32%, >95:5 dr). <sup>1</sup>H NMR (400 MHz, CDCl<sub>3</sub>) δ 7.33 – 7.17 (m, 8H), 6.88 (dd, *J* = 6.0, 3.1 Hz, 1H), 4.60 (d, *J* = 2.9 Hz, 1H), 3.98 (dd, *J* = 11.6, 6.9 Hz, 1H), 3.45 (s, 3H), 2.85 – 2.72 (m, 1H), 2.47 – 2.24 (m, 2H), 1.50 (s, 9H). <sup>13</sup>C NMR (101 MHz, CDCl<sub>3</sub>) δ 172.09, 146.74, 140.65, 135.01, 130.41, 130.11, 129.04, 128.65, 128.62, 126.49, 125.63, 80.63, 78.28, 57.28, 46.59, 46.35, 29.85, 29.29, 28.31. IR (neat): 2975, 2899, 1705, 1378, 1245 cm<sup>-1</sup>. HRMS (ESI) *m/z* calcd for C<sub>22</sub>H<sub>26</sub>NaO<sub>3</sub><sup>+</sup> [M+Na]<sup>+</sup> 361.1780, found 361.1783.

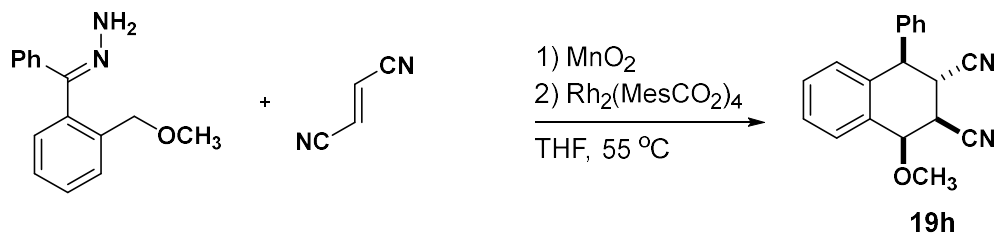

(1R,2S,3S,4R)-1-methoxy-4-phenyl-1,2,3,4-tetrahydronaphthalene-2,3-dicarbonitrile was synthesized according to General Procedure F, using (E)-((2-(methoxymethyl)phenyl)(phenyl)methylene)hydrazine (24.0 mg, 0.1 mmol), fumaronitrile (7.8 mg, 0.1 mmol), MnO<sub>2</sub> (69.6 mg, 0.8 mmol), Rh<sub>2</sub>(MesCO<sub>2</sub>)<sub>4</sub> (0.9 mg, 0.001 mmol) and THF (6 mL). The crude product was purified by flash column chromatography (hexane/EtOAc = 80:20, v/v) to obtain **19h** mixture of diastereomers as a white powder (17.1 mg, 59%, 82:18 dr). m.p. 195–197 °C. <sup>1</sup>H NMR (400 MHz, CDCl<sub>3</sub>) δ 7.53 (d, *J* = 7.9 Hz, 0H), 7.43 – 7.31 (m, 4H), 7.30 – 7.25 (m, 3H), 7.24 – 7.20 (m, 2H), 7.16 – 7.12 (m, 1H), 6.98 (d, *J* = 7.8 Hz, 0H), 6.89 (dt, *J* = 4.6, 2.1 Hz, 1H), 4.82 (d, *J* = 8.2 Hz, 0H), 4.55 (d, *J* = 2.5 Hz, 1H), 4.27 (d, *J* = 11.2 Hz, 1H), 3.84 (dd, *J* = 12.2, 11.1

Hz, 1H), 3.79 (s, 1H), 3.56 (s, 3H), 3.44 (dd,  $J = 10.7, 8.2$  Hz, 0H), 3.37 (dd,  $J = 12.2, 2.3$  Hz, 1H).  $^{13}\text{C}$  NMR (101 MHz,  $\text{CDCl}_3$ )  $\delta$  141.13, 137.89, 135.78, 134.16, 133.39, 131.02, 130.36, 130.02, 129.97, 129.55, 129.20, 129.12, 128.84, 128.70, 128.33, 128.23, 128.11, 128.07, 126.88, 118.53, 117.00, 116.47, 78.28, 75.21, 59.02, 57.46, 48.45, 44.91, 36.20, 34.63, 34.02, 31.12. IR (neat): 2921, 2881, 2260, 1251, 978  $\text{cm}^{-1}$ . HRMS (ESI)  $m/z$  calcd for  $\text{C}_{19}\text{H}_{17}\text{N}_2\text{O}^+$   $[\text{M}+\text{H}]^+$  289.1335, found 289.1341.

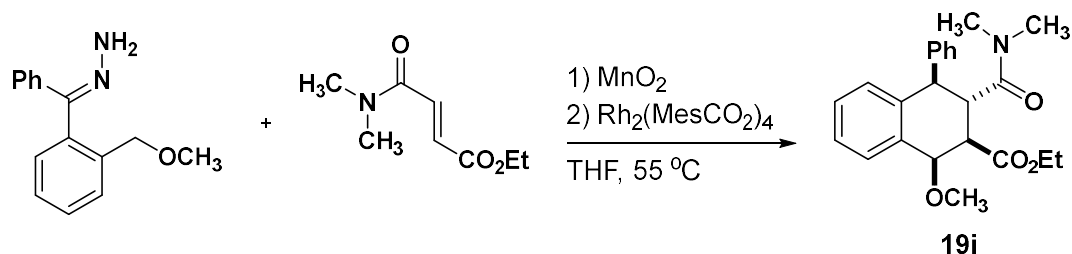

EtHyl (1R,2R,3S,4R)-3-(dimethylcarbamoyl)-1-methoxy-4-phenyl-1,2,3,4-tetrahydronaphthalene-2-carboxylate was synthesized according to General Procedure F, using (E)-((2-(methoxymethyl)phenyl)(phenyl)methylene)hydrazine (24.0 mg, 0.1 mmol), ethyl (E)-4-(dimethylamino)-4-oxobut-2-enoate (17.1 mg, 0.1 mmol),  $\text{MnO}_2$  (69.6 mg, 0.8 mmol),  $\text{Rh}_2(\text{MesCO}_2)_4$  (0.9 mg, 0.001 mmol) and THF (6 mL). The crude product was purified by flash column chromatography (hexane/EtOAc = 70:30, v/v) to obtain **19i** as a colorless oil (36.2 mg, 95%, >95:5 dr).  $^1\text{H}$  NMR (400 MHz,  $\text{CDCl}_3$ )  $\delta$  7.32 – 7.12 (m, 8H), 6.88 (dd,  $J = 5.5, 3.6$  Hz, 1H), 4.67 (d,  $J = 2.9$  Hz, 1H), 4.31 – 4.20 (m, 2H), 4.11 (dq,  $J = 10.8, 7.1$  Hz, 1H), 3.85 (dd,  $J = 11.8, 10.5$  Hz, 1H), 3.41 (s, 4H), 2.82 (s, 3H), 2.37 (s, 3H), 1.28 (t,  $J = 7.2$  Hz, 3H).  $^{13}\text{C}$  NMR (101 MHz,  $\text{CDCl}_3$ )  $\delta$  174.93, 172.38, 144.85, 139.55, 133.46, 130.43, 129.82, 129.43, 129.06, 128.52, 126.95, 125.68, 78.32, 60.80, 56.99, 49.92, 48.83, 41.60, 36.96, 35.76, 14.34. IR (neat): 3428, 2920, 1715, 1675, 1553, 1052  $\text{cm}^{-1}$ . HRMS (ESI)  $m/z$  calcd for  $\text{C}_{23}\text{H}_{28}\text{NO}_4^+$   $[\text{M}+\text{H}]^+$  382.2013, found 382.2015.

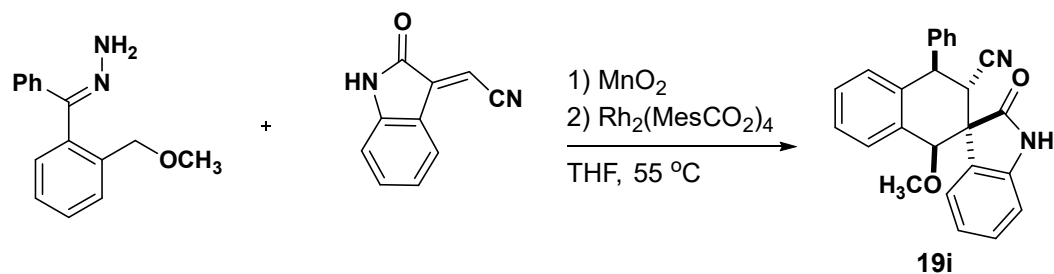



(1'S,3S,3'S,4'R)-1'-methoxy-2-oxo-4'-phenyl-3',4'-dihydro-1'H-spiro[indoline-3,2'-naphthalene]-3'-carbonitrile was synthesized according to General Procedure F, using (E)-((2-(methoxymethyl)phenyl)(phenyl)methylene)hydrazine (24.0 mg, 0.1 mmol), (E)-2-(2-oxoindolin-3-ylidene)acetonitrile (17.0 mg, 0.1 mmol), MnO<sub>2</sub> (69.6 mg, 0.8 mmol), Rh<sub>2</sub>(MesCO<sub>2</sub>)<sub>4</sub> (0.9 mg, 0.001 mmol) and THF (6 mL). The crude product was purified by flash column chromatography (hexane/EtOAc = 70:30, v/v) to obtain **19j** as a white powder (25.3 mg, 67%, >95:5 dr). <sup>1</sup>H NMR (400 MHz, CDCl<sub>3</sub>) δ 7.63 (d, *J* = 7.7 Hz, 1H), 7.48 (s, 1H), 7.40 (t, *J* = 7.5 Hz, 1H), 7.28 – 7.18 (m, 2H), 7.13 (ddd, *J* = 7.8, 5.9, 1.8 Hz, 2H), 6.98 (d, *J* = 7.7 Hz, 1H), 6.91 – 6.81 (m, 2H), 6.60 (d, *J* = 7.8 Hz, 1H), 6.27 (d, *J* = 9.9 Hz, 1H), 4.83 (d, *J* = 6.1 Hz, 1H), 4.46 (s, 1H), 4.05 (d, *J* = 6.1 Hz, 1H), 3.83 (s, 3H). <sup>13</sup>C NMR (101 MHz, CDCl<sub>3</sub>) δ 178.02, 141.14, 136.15, 135.20, 134.97, 129.39, 128.81, 128.72, 128.68, 128.48, 127.80, 127.55, 126.18, 122.19, 116.72, 109.74, 75.07, 61.23, 54.99, 52.35, 39.88. IR (neat): 3282, 2990, 2245, 1708, 1375 cm<sup>-1</sup>. HRMS (ESI) *m/z* calcd for C<sub>25</sub>H<sub>21</sub>N<sub>2</sub>O<sub>2</sub>+ [M+H]<sup>+</sup> 381.1598, found 381.1606.

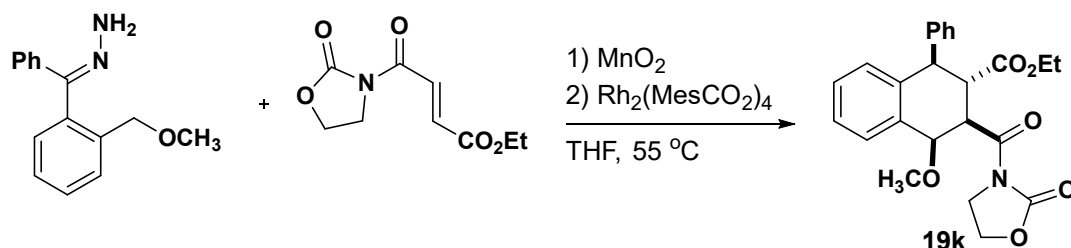

EtHyl (1R,2S,3R,4R)-4-methoxy-3-(2-oxooxazolidine-3-carbonyl)-1-phenyl-1,2,3,4-tetrahydronaphthalene-2-carboxylate was synthesized according to General Procedure F, using (E)-((2-(methoxymethyl)phenyl)(phenyl)methylene)hydrazine (24.0 mg, 0.1 mmol), ethyl (E)-4-oxo-4-(2-oxooxazolidin-3-yl)but-2-enoate (21.3 mg, 0.1 mmol), MnO<sub>2</sub> (69.6 mg, 0.8 mmol), Rh<sub>2</sub>(MesCO<sub>2</sub>)<sub>4</sub> (0.9 mg, 0.001 mmol) and THF (6 mL). The crude product was purified by flash column chromatography (hexane/EtOAc = 60:40, v/v) to obtain **19k** as a clear oil (26.9 mg, 65%, >95:5 dr, 72:28 rr). <sup>1</sup>H NMR (400 MHz, CDCl<sub>3</sub>) δ 7.35 – 7.23 (m, 4H), 7.21 – 7.15 (m, 4H), 6.84 (dd, *J* = 5.4, 3.7 Hz, 1H), 4.78 (d, *J* = 2.7 Hz, 1H), 4.47 (t, *J* = 8.1 Hz, 2H), 4.40 (dd, *J* = 11.9, 2.6 Hz, 1H), 4.20 – 3.99 (m, 3H), 3.89 (qd, *J* = 7.1, 5.5 Hz, 2H), 3.80 (t, *J* = 11.5 Hz, 1H), 3.35 (s, 3H), 0.89 (t, *J* = 7.1 Hz, 3H). <sup>13</sup>C NMR (101 MHz, CDCl<sub>3</sub>) δ 175.34, 172.01, 153.54, 143.79, 139.13, 133.08, 130.26, 130.20, 129.45, 129.13, 128.53, 127.00, 125.97, 77.03, 62.45, 60.42, 56.84,

49.94, 48.13, 45.84, 42.91, 13.87. IR (neat): 2889, 1781, 1675, 1353, 1252  $\text{cm}^{-1}$ . HRMS (ESI)  $m/z$  calcd for  $\text{C}_{24}\text{H}_{25}\text{NNaO}_6$   $[\text{M}+\text{Na}]^+$  446.1580, found 446.1568.

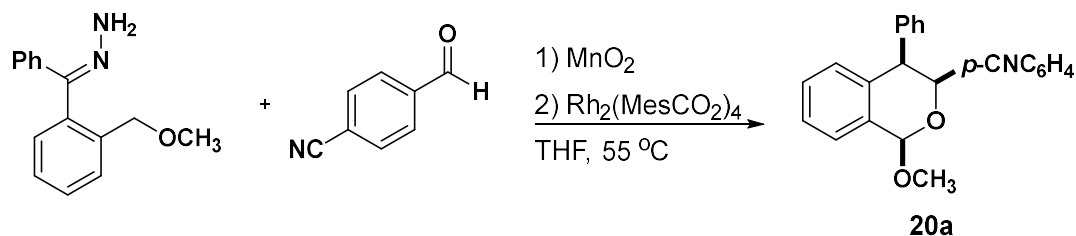

4-((1R,3S,4R)-1-methoxy-4-phenylisochroman-3-yl)benzonitrile was synthesized according to General Procedure F, using (E)-((2-(methoxymethyl)phenyl)(phenyl)methylene)hydrazine (24.0 mg, 0.1 mmol), 4-cyanobenzaldehyde (13.1 mg, 0.1 mmol),  $\text{MnO}_2$  (69.6 mg, 0.8 mmol),  $\text{Rh}_2(\text{MesCO}_2)_4$  (0.9 mg, 0.001 mmol) and THF (6 mL). The crude product was purified by flash column chromatography (hexane/EtOAc = 90:10, v/v) to obtain **20a** as a white powder (23.0 mg, 67%, 77:23 dr). m.p. 280-282 °C.  $^1\text{H}$  NMR (400 MHz,  $\text{CDCl}_3$ )  $\delta$  7.55 – 7.50 (m, 1H), 7.45 (d,  $J$  = 8.4 Hz, 2H), 7.38 – 7.22 (m, 4H), 7.20 – 7.13 (m, 2H), 7.03 (tt,  $J$  = 4.6, 1.1 Hz, 5H), 6.82 – 6.73 (m, 2H), 5.90 (s, 1H), 5.31 (d,  $J$  = 3.5 Hz, 1H), 4.13 (d,  $J$  = 3.4 Hz, 1H), 3.77 (s, 3H).  $^{13}\text{C}$  NMR (101 MHz,  $\text{CDCl}_3$ )  $\delta$  145.41, 139.62, 137.81, 134.28, 131.72, 130.15, 129.83, 128.90, 127.75, 127.45, 126.76, 126.67, 125.92, 110.89, 101.77, 76.53, 56.61, 50.23. IR (neat): 2872, 2213, 1275, 1153, 1052  $\text{cm}^{-1}$ . HRMS (ESI)  $m/z$  calcd for  $\text{C}_{23}\text{H}_{20}\text{NO}_2$   $[\text{M}+\text{H}]^+$  342.1489, found 342.1483.

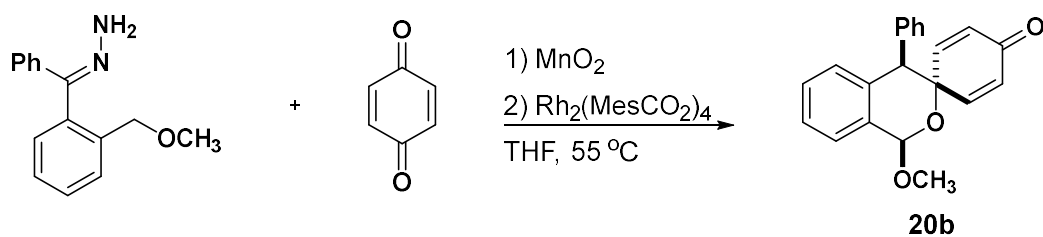

(1'R,4'R)-1'-methoxy-4'-phenylspiro[cyclohexane-1,3'-isochromane]-2,5-dien-4-one was synthesized according to General Procedure F, using (E)-((2-(methoxymethyl)phenyl)(phenyl)methylene)hydrazine (24.0 mg, 0.1 mmol), benzoquinone (10.8 mg, 0.1 mmol),  $\text{MnO}_2$  (69.6 mg, 0.8 mmol),  $\text{Rh}_2(\text{MesCO}_2)_4$  (0.9 mg, 0.001 mmol) and THF (6 mL). The crude product was purified by flash column chromatography (hexane/EtOAc = 90:10, v/v) to obtain **20b** as a clear oil (22.5 mg, 71%, >95:5 dr).  $^1\text{H}$  NMR (400 MHz,  $\text{CDCl}_3$ )  $\delta$  7.43 (dd,  $J$  = 7.7, 1.5 Hz, 1H), 7.38 – 7.29 (m, 2H), 7.28 – 7.17 (m, 5H), 7.12 – 7.05 (m, 2H), 6.98 – 6.83 (m, 2H), 6.07 (ddd,  $J$  = 14.7, 10.3, 2.0 Hz, 2H), 5.76 (s, 1H), 4.44 (s, 1H), 3.55 (s, 3H).  $^{13}\text{C}$  NMR (101

MHz, CDCl<sub>3</sub>) δ 185.64, 148.70, 146.39, 136.81, 134.47, 132.92, 130.04, 129.21, 128.97, 128.58, 128.10, 128.04, 127.51, 127.26, 97.85, 72.21, 55.99, 53.71. IR (neat): 2902, 1660, 1315, 1253, 1052 cm<sup>-1</sup>. HRMS (ESI) *m/z* calcd for C<sub>21</sub>H<sub>19</sub>O<sub>3</sub><sup>+</sup> [M+H]<sup>+</sup> 319.1329, found 319.1318.

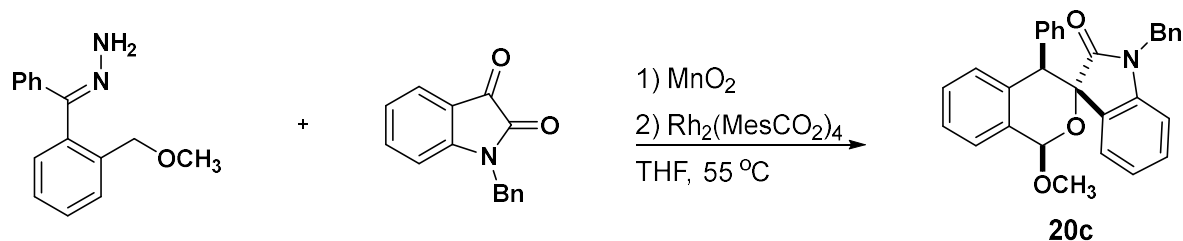

(1*R*,3*S*,4'*R*)-1-benzyl-1'-methoxy-4'-phenylspiro[indoline-3,3'-isochroman]-2-one was synthesized according to General Procedure F, using (E)-((2-(methoxymethyl)phenyl)(phenyl)methylene)hydrazine (24.0 mg, 0.1 mmol), 1-benzylindoline-2,3-dione (23.7 mg, 0.1 mmol), MnO<sub>2</sub> (69.6 mg, 0.8 mmol), Rh<sub>2</sub>(MesCO<sub>2</sub>)<sub>4</sub> (0.9 mg, 0.001 mmol) and THF (6 mL). The crude product was purified by flash column chromatography (hexane/EtOAc = 80:20, v/v) to obtain **20c** as a yellowish solid (42.4 mg, 95%, >95:5 dr). m.p. 165-166 °C. <sup>1</sup>H NMR (400 MHz, CDCl<sub>3</sub>) δ 7.56 (d, *J* = 7.7 Hz, 1H), 7.61 – 7.09 (m, 5H), 7.19 – 6.97 (m, 5H), 6.96 – 6.83 (m, 1H), 6.78 (td, *J* = 7.6, 1.0 Hz, 1H), 6.55 – 6.45 (m, 2H), 6.30 (d, *J* = 7.8 Hz, 1H), 6.01 (s, 1H), 5.07 (d, *J* = 16.1 Hz, 1H), 4.92 (s, 1H), 4.37 (d, *J* = 16.1 Hz, 1H), 3.44 (s, 3H). <sup>13</sup>C NMR (101 MHz, CDCl<sub>3</sub>) δ 174.62, 143.29, 135.39, 135.12, 134.89, 134.00, 129.61, 128.66, 128.63, 128.26, 128.13, 127.87, 127.70, 127.33, 127.19, 127.00, 126.92, 126.43, 122.12, 109.18, 98.31, 78.60, 55.94, 51.43, 43.86. IR (neat): 2920, 1721, 1605, 1453, 1352 cm<sup>-1</sup>. HRMS (ESI) *m/z* calcd for C<sub>30</sub>H<sub>26</sub>NO<sub>3</sub><sup>+</sup> [M+H]<sup>+</sup> 448.1907, found 448.1922.

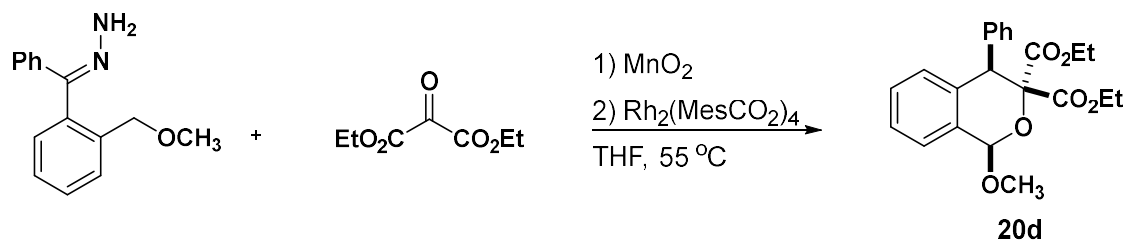

Diethyl (1*R*,4*R*)-1-methoxy-4-phenylisochromane-3,3-dicarboxylate was synthesized according to General Procedure F, using (E)-((2-(methoxymethyl)phenyl)(phenyl)methylene)hydrazine (24.0 mg, 0.1 mmol), diethyl ketomalonate (8.7 mg, 0.1 mmol), MnO<sub>2</sub> (69.6 mg, 0.8 mmol),

Rh<sub>2</sub>(MesCO<sub>2</sub>)<sub>4</sub> (0.9 mg, 0.001 mmol) and THF (6 mL). The crude product was purified by flash column chromatography (hexane/EtOAc = 90:10, v/v) to obtain **20d** as a clear oil (31.8 mg, 83%, >95:5 dr). <sup>1</sup>H NMR (400 MHz, CDCl<sub>3</sub>) δ 7.42 – 7.29 (m, 3H), 7.28 – 7.16 (m, 5H), 7.06 (dd, *J* = 7.2, 1.9 Hz, 1H), 5.81 (d, *J* = 1.1 Hz, 1H), 4.84 (s, 1H), 4.22 (q, *J* = 7.1 Hz, 2H), 4.07 – 3.87 (m, 2H), 3.80 (s, 3H), 1.20 (t, *J* = 7.1 Hz, 3H), 1.02 (t, *J* = 7.1 Hz, 2H). <sup>13</sup>C NMR (101 MHz, CDCl<sub>3</sub>) δ 167.94, 166.25, 139.55, 136.02, 131.80, 130.09, 129.45, 129.16, 128.30, 128.26, 127.40, 127.29, 126.03, 99.01, 84.19, 62.50, 62.01, 56.90, 47.48, 14.14, 13.87. IR (neat): 2920, 1761, 1755, 1253, 1052, cm<sup>-1</sup>. HRMS (ESI) *m/z* calcd for : C<sub>22</sub>H<sub>24</sub>NaO<sub>6</sub> [M+H]<sup>+</sup> 407.1471, found 407.1460.

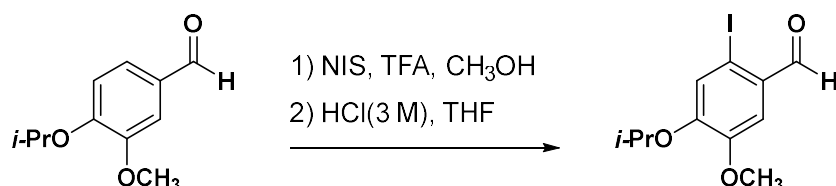

2-iodo-4-isopropoxy-5-methoxybenzaldehyde was synthesized by suspending 4-isopropoxy-3-methoxybenzaldehyde (1.9423 g, 10.0 mmol) and *n*-iodosuccinimide (4.3988 g, 20 mmol) in methanol (25 mL). After cooling to 0 °C, trifluoroacetic acid (0.15 mL, 0.2 mmol) was added dropwise. The reaction was allowed to warm up to room temperature overnight. A saturated solution of sodium thiosulfate (15 mL) was added to quench the reaction. The organic layer was extracted in diethyl ether (3 x 50 mL), washed with NaHCO<sub>3</sub>(aq) (2 x 25 mL) and brine (2 x 25 mL). The combined organic layers were dried over Na<sub>2</sub>SO<sub>4</sub> and concentrated in vacuo. The resulting oil was dissolved in THF (25 mL), 3 M HCl (10 mL) was added dropwise and the resulting suspension was stirred for 2 hours. NaHCO<sub>3</sub>(aq) (20 mL) was added in small aliquots, the organic layer was extracted in diethyl ether (3 x 50 mL), washed with brine (2 x 25 mL) and dried over Na<sub>2</sub>SO<sub>4</sub>. The excess solvent was removed by rotatory evaporation to afford 2-iodo-4-isopropoxy-5-methoxybenzaldehyde as a white powder (3.1957 g, 99%). <sup>1</sup>H NMR (300 MHz, CDCl<sub>3</sub>) δ 9.87 (s, 1H), 7.33 (s, 1H), 7.10 (s, 1H), 4.69 (p, *J* = 6.1 Hz, 1H), 3.91 (s, 3H), 1.45 (d, *J* = 6.1 Hz, 6H). <sup>1</sup>H NMR data was consistent with reported literature values.<sup>18</sup>

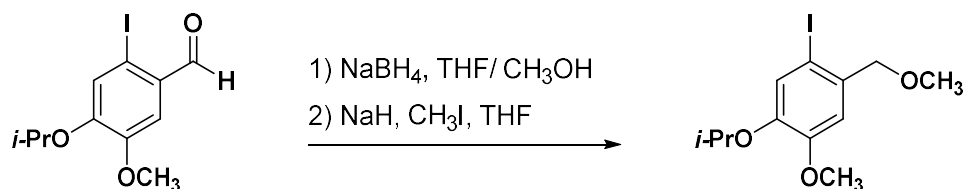

1-iodo-5-isopropoxy-4-methoxy-2-(methoxymethyl)benzene was synthesized by dissolving 2-iodo-4-isopropoxy-5-methoxybenzaldehyde (1.6007 g, 5.0 mmol) in 20 mL (THF/ CH<sub>3</sub>OH= 7:3 v/v), followed by cooling to 0 °C and addition of sodium borohydride (0.2270 g, 1.2 mmol). After 2 hours, NH<sub>4</sub>Cl(aq) (10 mL) was added, and the organic layer was extracted in diethyl ether (3x 25 mL), washed with brine (2 x 20 mL) and dried over Na<sub>2</sub>SO<sub>4</sub>. After removing excess solvent, the crude alcohol was dissolved in THF (20 mL), cooled to 0 °C, and sodium hydride (60% in an oil dispersion) (0.1800g, 7.5 mmol) was added in small portions. Iodomethane (0.47 mL, 7.5 mmol) was added dropwise as soon as bubbling stopped and the reaction was allowed to warm up to room temperature overnight. 10 mL of water were added and the organic layer was extracted in diethyl ether (3 x 25 mL), washed with brine (2x 20 mL) and dried over Na<sub>2</sub>SO<sub>4</sub>. Excess solvent was removed by rotatory evaporation and the resulting crude was purified by flash column chromatography (hexane/EtOAc = 98:2, v/v) to afford 1-iodo-5-isopropoxy-4-methoxy-2-(methoxymethyl)benzene as a yellowish oil (1.5453 g, 92%). <sup>1</sup>H NMR (400 MHz, CDCl<sub>3</sub>) δ 7.27 (s, 1H), 6.97 (s, 1H), 4.49 (dt, *J* = 12.3, 6.1 Hz, 1H), 4.38 (s, 2H), 3.85 (s, 3H), 3.46 (s, 3H), 1.35 (d, *J* = 6.1 Hz, 6H). <sup>13</sup>C NMR (101 MHz, CDCl<sub>3</sub>) δ 150.98, 147.40, 133.43, 125.96, 112.47, 85.96, 78.27, 72.12, 58.60, 56.14, 22.12. C<sub>12</sub>H<sub>18</sub>IO<sub>3</sub><sup>+</sup> [M+H]<sup>+</sup> 337.0295, found 337.0287.

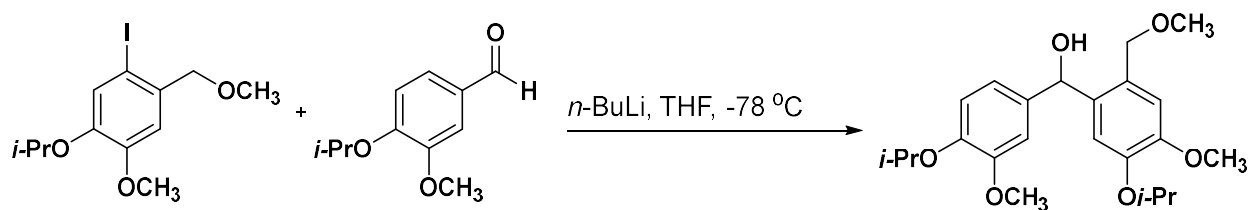

(4-isopropoxy-3-methoxyphenyl)(5-isopropoxy-4-methoxy-2-(methoxymethyl)phenyl)methanol was synthesized according to General Procedure A, using 1-iodo-5-isopropoxy-4-methoxy-2-(methoxymethyl)benzene (1.3447 g, 4.0 mmol), *n*-BuLi (2.25 M, 2.0 mL, 4.4 mmol), 4-isopropoxy-3-methoxybenzaldehyde (854.6 mg, 4.4 mmol) and THF (20 mL). The crude product was purified by flash column chromatography (hexane/EtOAc = 60:40, v/v) to obtain the ketone as a yellowish oil (1.0864 mg, 67%). Compound was isolated as a mixture of rotamers; <sup>1</sup>H NMR spectral data for this mixture is complex and the mixture was carried on to the next step.

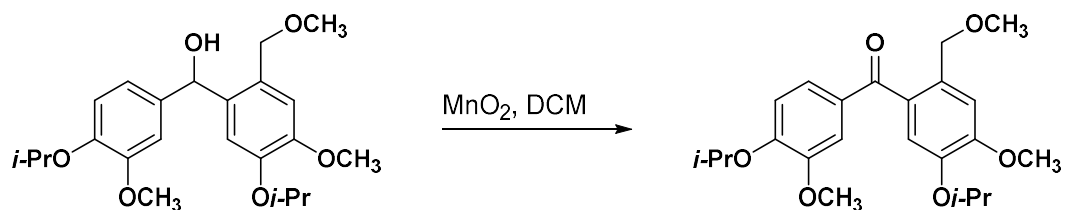

(4-isopropoxy-3-methoxyphenyl)(5-isopropoxy-4-methoxy-2-(methoxymethyl)phenyl)methanone was synthesized by suspending (4-isopropoxy-3-methoxyphenyl)(5-isopropoxy-4-methoxy-2-(methoxymethyl)phenyl)methanol (2.1967 g, 5.43 mmol), and manganese dioxide (4.7214 g, 54.3 mmol) in DCM (20 mL). After stirring for 48 hours, the mixture was filtered over celites, and the excess solvent was removed by rotatory evaporation to afford the ketone as a white powder (2.0315 g, 93 %). m.p. 221-222 °C. <sup>1</sup>H NMR (400 MHz, CDCl<sub>3</sub>) δ 7.48 (d, *J* = 2.0 Hz, 1H), 7.34 – 7.24 (m, 1H), 7.13 (s, 1H), 6.95 (s, 1H), 6.86 (d, *J* = 8.4 Hz, 1H), 4.73 – 4.60 (m, 1H), 4.52 (s, 2H), 4.45 (p, *J* = 6.1 Hz, 1H), 3.94 (s, 3H), 3.90 (s, 3H), 3.32 (s, 3H), 1.42 (d, *J* = 6.0 Hz, 6H), 1.33 (d, *J* = 6.0 Hz, 6H). <sup>13</sup>C NMR (101 MHz, CDCl<sub>3</sub>) δ 195.91, 152.44, 151.95, 149.92, 145.26, 132.61, 130.91, 129.97, 125.57, 117.44, 112.67, 112.41, 111.79, 71.96, 71.91, 71.38, 58.54, 56.19, 22.16, 22.08. C<sub>23</sub>H<sub>31</sub>O<sub>6</sub>+ [M+H]<sup>+</sup> 403.2115, found 403.2107.

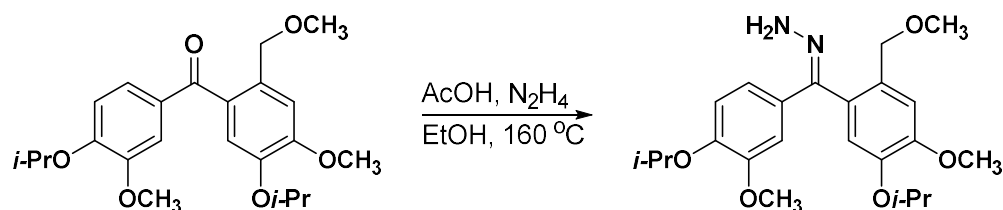

(E)-((4-isopropoxy-3-methoxyphenyl)(5-isopropoxy-4-methoxy-2-(methoxymethyl)phenyl)methylene)hydrazine was synthesized according to General Procedure B, using (4-isopropoxy-3-methoxyphenyl)(5-isopropoxy-4-methoxy-2-(methoxymethyl)phenyl)methanone (805.0 mg, 2.0 mmol), N<sub>2</sub>H<sub>4</sub> (0.77 mL, 24 mmol), HOAc (0.15 mL, 2.4 mmol) and EtOH (4.0 mL). The crude product was purified by flash column chromatography (hexane/EtOAc = 50:50, v/v) to obtain the hydrazone as a pale yellow oil (822.9 mg, 99%). Compound was isolated as a mixture of isomers. <sup>1</sup>H NMR spectral data for this mixture is complex and the mixture was carried on to the next step.

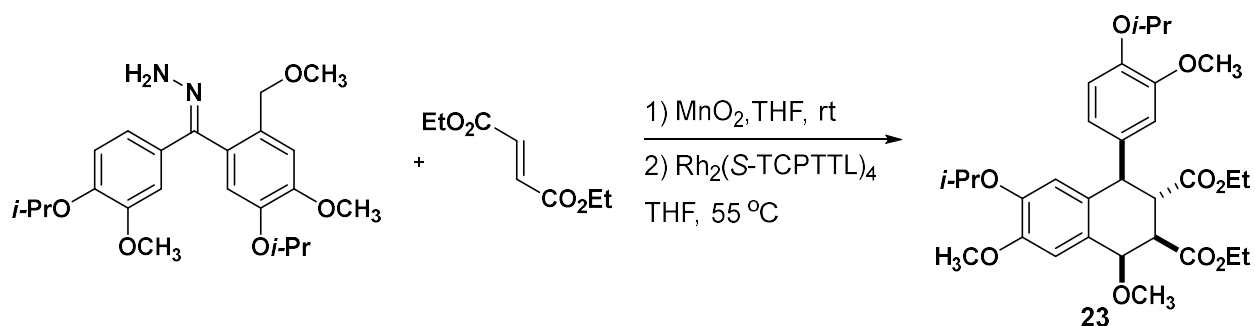

Diethyl (1R,2R,3S,4R)-6-isopropoxy-4-(4-isopropoxy-3-methoxyphenyl)-1,7-dimethoxy-1,2,3,4-tetrahydronaphthalene-2,3-dicarboxylate was synthesized according to General Procedure F, using (E)-((4-isopropoxy-3-methoxyphenyl)(5-isopropoxy-4-methoxy-2-(methoxymethyl)phenyl)methylene)hydrazine (222.1 mg, 0.5 mmol), diethyl fumarate (129.1 mg, 0.5 mmol), MnO<sub>2</sub> (347.8 mg, 4.0 mmol), Rh<sub>2</sub>(S-TCPTTL)<sub>4</sub> (9.9 mg, 0.005 mmol) and THF (10 mL). The crude product was purified by flash column chromatography (hexane/EtOAc = 80:20, v/v) to obtain **23** as a clear oil (206.0 mg, 74%, >95:5 dr). <sup>1</sup>H NMR (400 MHz, CDCl<sub>3</sub>) δ 6.82 (d, *J* = 7.9 Hz, 1H), 6.76 (s, 1H), 6.67 (dd, *J* = 8.1, 2.1 Hz, 1H), 6.63 (d, *J* = 2.1 Hz, 1H), 6.33 (s, 1H), 4.64 (d, *J* = 3.1 Hz, 1H), 4.56 – 4.43 (m, 1H), 4.36 – 4.10 (m, 3H), 4.01 – 3.86 (m, 6H), 3.76 (s, 3H), 3.52 – 3.44 (m, 1H), 3.43 (s, 3H), 3.25 (dd, *J* = 12.1, 3.1 Hz, 1H), 1.35 (dd, *J* = 6.1, 4.0 Hz, 7H), 1.29 (t, *J* = 7.1 Hz, 3H), 1.23 (d, *J* = 6.1 Hz, 3H), 1.12 (d, *J* = 6.0 Hz, 3H), 0.96 (t, *J* = 7.1 Hz, 3H). <sup>13</sup>C NMR (101 MHz, CDCl<sub>3</sub>) δ 175.59, 171.95, 150.76, 148.39, 147.78, 146.21, 136.74, 131.48, 126.16, 121.72, 116.42, 116.31, 112.87, 112.69, 77.77, 71.69, 71.10, 61.01, 60.32, 57.44, 56.26, 56.08, 49.67, 48.85, 45.84, 22.20, 22.12, 22.07, 21.65, 14.32, 14.04. IR (neat): 2982, 2890, 1715, 1252, 1240 cm<sup>-1</sup>. HRMS (ESI) *m/z* calcd for C<sub>31</sub>H<sub>42</sub>NaO<sub>9</sub><sup>+</sup> [M+Na]<sup>+</sup> 581.2727, found 581.2731.

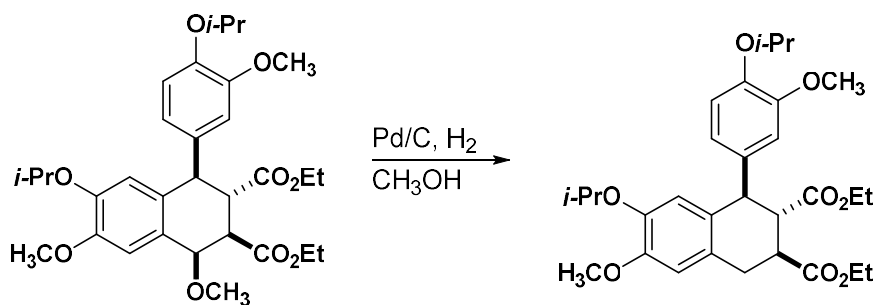

Diethyl (1R,2S,3S)-7-isopropoxy-1-(4-isopropoxy-3-methoxyphenyl)-6-methoxy-1,2,3,4-tetrahydronaphthalene-2,3-dicarboxylate was synthesized by suspending **23** (129.0 mg, 0.23 mmol) and 10 % Pd/C (150.0 mg, 0.14 mmol) in methanol (25 mL). Purged with hydrogen gas

for 10 minutes and allowed to stir overnight under a hydrogen. Filtered over pad of celites and removed excess solvent by rotatory evaporation to obtain product as a clear oil (119.0 mg, 98%).  $^1\text{H}$  NMR (400 MHz,  $\text{CDCl}_3$ )  $\delta$  6.82 (d,  $J = 8.1$  Hz, 1H), 6.65 (dd,  $J = 8.1, 2.1$  Hz, 1H), 6.60 (s, 2H), 6.25 (s, 1H), 4.50 (p,  $J = 6.1$  Hz, 1H), 4.24 – 4.07 (m, 4H), 3.92 (ddp,  $J = 14.1, 7.0, 3.5$  Hz, 2H), 3.83 (s, 3H), 3.76 (s, 3H), 3.27 – 2.97 (m, 4H), 1.35 (dd,  $J = 6.1, 4.3$  Hz, 6H), 1.26 (t,  $J = 7.1$  Hz, 3H), 1.20 (d,  $J = 6.1$  Hz, 3H), 1.11 (d,  $J = 6.0$  Hz, 3H), 0.95 (t,  $J = 7.1$  Hz, 3H).  $^{13}\text{C}$  NMR (101 MHz,  $\text{CDCl}_3$ )  $\delta$  174.45, 173.99, 150.70, 149.22, 146.27, 145.68, 136.25, 130.14, 126.71, 121.82, 117.08, 116.29, 112.79, 111.40, 71.69, 71.39, 61.04, 60.44, 56.13, 56.08, 51.53, 49.24, 43.51, 32.15, 22.23, 22.15, 21.71, 14.30, 14.06. IR (neat): 2978, 2887, 1725, 1249, 1049  $\text{cm}^{-1}$ . HRMS (ESI)  $m/z$  calcd for  $\text{C}_{30}\text{H}_{40}\text{NaO}_8^+$   $[\text{M}+\text{Na}]^+$  551.2621, found 551.2618.

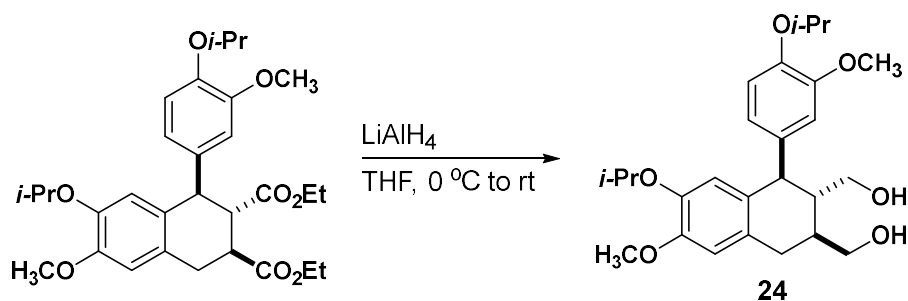

((1R,2S,3S)-7-isopropoxy-1-(4-isopropoxy-3-methoxyphenyl)-6-methoxy-1,2,3,4-tetrahydronaphthalene-2,3-diyl)dimethanol was synthesized by suspending lithium aluminum hydride (34.2 mg, 0.90 mmol) in THF (5 mL); after cooling down to 0 °C, diethyl (1R,2S,3S)-7-isopropoxy-1-(4-isopropoxy-3-methoxyphenyl)-6-methoxy-1,2,3,4-tetrahydronaphthalene-2,3-dicarboxylate (119.0 mg, 0.23 mmol) dissolved in THF (5 mL) was added dropwise. The reaction was allowed to stir at room temperature for 2 hours. After cooling down to 0 °C, water (0.05 mL) was added, followed by 15% NaOH (0.05 mL) and water (0.15 mL) to quench any leftover hydride. The suspension was filtered over celites and the excess solvent was removed by rotatory evaporation to afford **24** as a white powder (101.1 mg, 99%).  $^1\text{H}$  NMR (400 MHz,  $\text{CDCl}_3$ )  $\delta$  6.82 (d,  $J = 8.1$  Hz, 1H), 6.67 (dd,  $J = 8.2, 2.0$  Hz, 1H), 6.63 – 6.56 (m, 2H), 6.21 (s, 1H), 4.53 – 4.45 (m, 1H), 4.15 (p,  $J = 6.1$  Hz, 1H), 3.88 – 3.67 (m, 10H), 3.70 – 3.60 (m, 1H), 3.50 (dd,  $J = 11.1, 5.3$  Hz, 1H), 2.84 – 2.66 (m, 2H), 1.35 (dd,  $J = 6.1, 2.7$  Hz, 6H), 1.19 (d,  $J = 6.1$  Hz, 3H), 1.10 (d,  $J = 6.1$  Hz, 3H).  $^{13}\text{C}$  NMR (101 MHz,  $\text{CDCl}_3$ )  $\delta$  150.69, 148.72, 145.81, 145.17, 138.66, 132.12, 128.87, 121.99, 118.13, 116.26, 112.98, 111.50, 71.68, 71.39, 66.52, 62.94, 62.83, 56.15, 56.01, 48.19,



48.11, 40.12, 33.33, 29.98, 22.23, 22.20, 22.10, 21.71. IR (neat): 3289, 2980, 2879, 1249, 1219  $\text{cm}^{-1}$ . HRMS (ESI)  $m/z$  calcd for  $\text{C}_{26}\text{H}_{36}\text{NaO}_6^+$   $[\text{M}+\text{Na}]^+$  467.2410, found 467.2406.

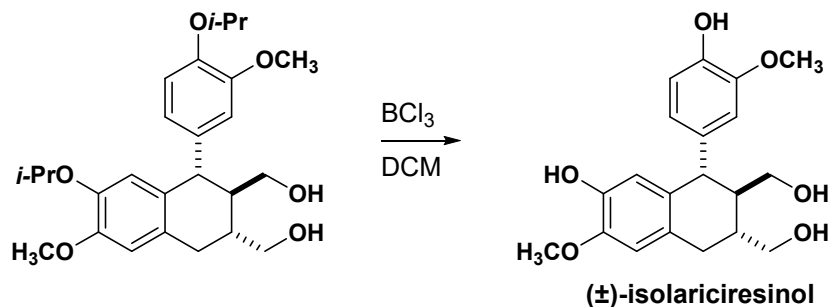

(±)-Isolariciresinol was synthesized by dissolving **24** (44.5 mg, 0.1 mmol) in DCM (2 mL), and cooling down to  $-78\text{ }^{\circ}\text{C}$  before adding boron trichloride (1 M, 0.3 mL, 0.3 mmol). Although a white precipitate started forming almost immediately, the reaction was allowed to stir for 4 hours at room temperature to allow completion. The white precipitated was collected by vacuum filtrating and washed with cold DCM to afford (±)-isolariciresinol as a white powder (34.5 mg, 96%).  $^1\text{H}$  NMR (400 MHz, MeOD)  $\delta$  6.62 (d,  $J = 8.0$  Hz, 1H), 6.57 – 6.52 (m, 2H), 6.49 (dd,  $J = 8.0, 1.9$  Hz, 1H), 6.06 (d,  $J = 0.9$  Hz, 1H), 3.71 – 3.50 (m, 10H), 3.28 (dd,  $J = 11.2, 4.1$  Hz, 1H), 2.65 (d,  $J = 7.7$  Hz, 2H), 1.97 – 1.81 (m, 1H), 1.65 (tt,  $J = 10.0, 3.7$  Hz, 1H).  $^1\text{H}$  NMR data was consistent with reported literature values.<sup>19</sup>

## References

- 1 A. Baykal and B. Plietker, *European J. Org. Chem.*, 2020, **2020**, 1145–1147.
- 2 T. Klatt, K. Groll and P. Knochel, *Chem. Commun.*, 2013, **49**, 6953–6955.
- 3 E. Anderson and B. Capon, *J. Chem. Soc. Perkin Trans. 2*, 1972, 515–522.
- 4 H. Yi, L. Niu, S. Wang, T. Liu, A. K. Singh and A. Lei, *Org. Lett.*, 2017, **19**, 122–125.
- 5 L. R. Peacock, R. S. L. Chapman, A. C. Sedgwick, M. F. Mahon, D. Amans and S. D. Bull, *Org. Lett.*, 2015, **17**, 994–997.
- 6 S. Lauzon, H. Keipour, V. Gandon and T. Ollevier, *Org. Lett.*, 2017, **19**, 6324–6327.
- 7 J. H. Tsai, A. S. Waldman and J. S. Nowick, *Bioorg. Med. Chem.*, 1999, **7**, 29–38.
- 8 B. M. Trost, S. Malhotra and W. H. Chan, *J. Am. Chem. Soc.*, 2011, **133**, 7328–7331.

- 9 V. H. G. Rohde, P. Pommerening, H. F. T. Klare and M. Oestreich, *Organometallics*, 2014, **33**, 3618–3628.
- 10 F. Shi, Z.-L. Tao, S.-W. Luo, S.-J. Tu and L.-Z. Gong, *Chem. Eur. J.*, 2012, **18**, 6885–6894.
- 11 Y. Ogura, M. Akakura, A. Sakakura and K. Ishihara, *Angew. Chem. Int. Ed.*, 2013, **52**, 8299–8303.
- 12 A. Ilangovan and G. Satish, *J. Org. Chem.*, 2014, **79**, 4984–4991.
- 13 C.-P. Wang and G.-F. Jiang, *Tetrahedron Lett.*, 2017, **58**, 1747–1750.
- 14 B. Zhou, Y. Yang, S. Lin and Y. Li, *Adv. Synth. Catal.*, 2013, **355**, 360–364.
- 15 T. Kim, K. H. Jeong, K. S. Kang, M. Nakata and J. Ham, *European J. Org. Chem.*, 2017, **2017**, 1704–1712.
- 16 J. C. Hsieh, Y. C. Chen, A. Y. Cheng and H. C. Tseng, *Org. Lett.*, 2012, **14**, 1282–1285.
- 17 N. Kaplaneris, A. Bisticha, G. N. Papadopoulos, D. Limnios and C. G. Kokotos, *Green Chem.*, 2017, **19**, 4451–4456.
- 18 D. J. Kerr, E. Hamel, M. K. Jung and B. L. Flynn, *Bioorganic Med. Chem.*, 2007, **15**, 3290–3298.
- 19 F. Yue, F. Lu, M. Regner, R. Sun and J. Ralph, *ChemSusChem*, 2017, **10**, 830–835.

## Computational Methods

### Computational Details for Mechanistic Study.

Density functional theory optimization and frequency calculations were carried out in Gaussian 16<sup>1</sup> at the B3LYP-D3/Def2SVP level of theory<sup>2</sup> in solvent—dichloromethane modeled with the SMD<sup>3</sup> implicit solvent model. Electronic energies were subsequently corrected with single-point calculations at the SMD(DCM)-B3LYP-D3/Def2TZVPP level. Intrinsic reaction coordinate calculations<sup>4</sup> were used to further characterize the transition state structures. B3LYP-D3 has repeatedly been proven to be a reliable functional for Rh-catalyzed reaction mechanisms.<sup>5,6</sup>

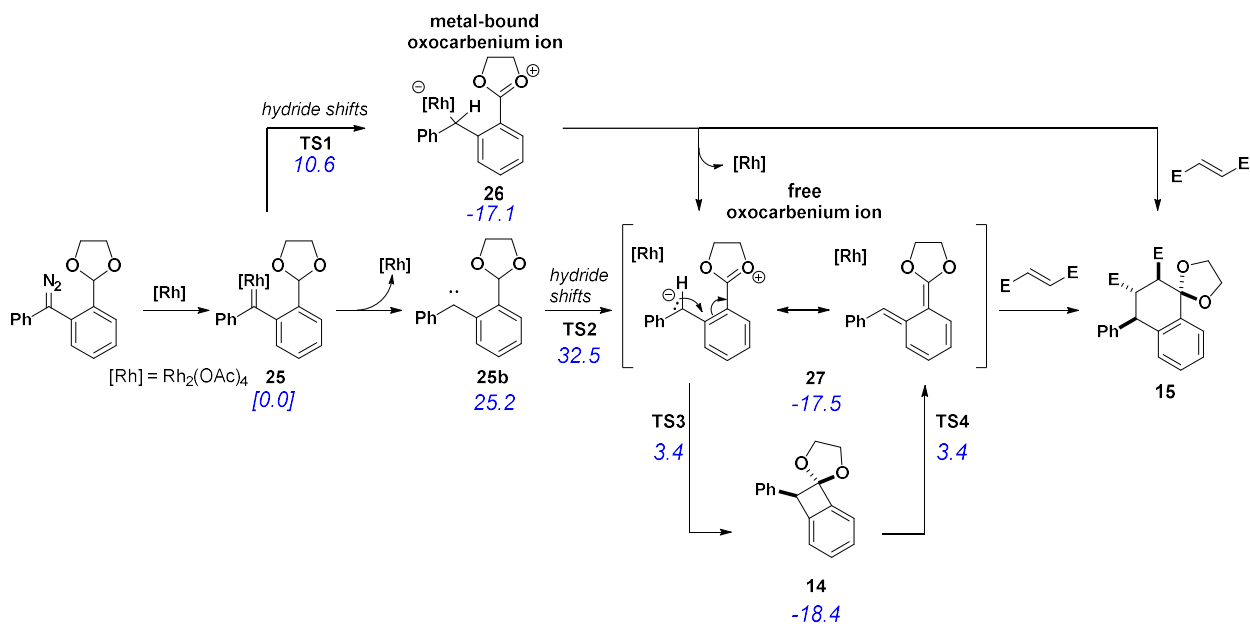

Figure CS1. The mechanism of diene formation from Rh-carbene intermediate. Relative free energies (blue, kcal mol<sup>-1</sup>) reported at the SMD(DCM)-B3LYP-D3/Def2-TZVPP//SMD(DCM)-B3LYP-D3/Def2-SVP level of theory.

**Computational Results of Mechanistic Study.** The mechanism for formation of diene (Figure CS1) was investigated with density functional theory calculations at the SMD(DCM)-B3LYP-D3/Def2TZVPP//B3LYP-D3/Def2SVP level of theory. Our calculations predict that the hydride shift event is facile to the ylide intermediate and occurs with the metal bound to the substrate. We tried to find a hydride shift transition state structure free of metal-catalyst, but the TSS and free carbene are too high in energy to be relevant (32 and 25 kcal/mol, respectively). At this stage, loss of Rh-catalyst reveals a metal-free ortho-quinodimethane (o-QDM) which acts as the diene in the Diels-Alder step. From the o-QDM, either direct Diels-Alder or formation of a benzocyclobutane intermediate can occur. Our calculations weigh against benzocyclobutane formation being likely, as the barrier to form that intermediate is ~20 kcal/mol and the benzocyclobutane is only slightly more exergonic (~ 1 kcal/mol). Formation of the Diels-Alder adduct product directly from the o-QDM intermediate is more likely. In sum, hydride shifts with metal-catalyst bound and benzocyclobutane formation is unlikely before forming the DA-adduct.

The structures for Figure 1 of the main text and Figure S1 can be found on the ioChem-BD[6] database for ease of access of coordinates: see the following DOI—<https://doi.org/10.19061/iochem-bd-6-122>. Energies and lowest vibrational frequencies for these structures are in **Table S0** below.

**Table S0.** Energies and lowest vibrational frequencies for computed structures for mechanistic study. Free energies were computed at the B3LYP-D3/def2SVP level and electronic energies were computed at the B3LYP-D3/def2TZVPP, both in SMD solvent (dichloromethane).

| Structure               | Free Energy Correction (Hartree) | Electronic Energy (Hartree) | Lowest Frequency (cm <sup>-1</sup> ) |
|-------------------------|----------------------------------|-----------------------------|--------------------------------------|
| <b>25</b>               | 0.397437                         | -1904.657208                | 16.7337                              |
| <b>25b</b>              | 0.214056                         | -768.7931436                | 26.6014                              |
| <b>26</b>               | 0.400483                         | -1904.687438                | 22.79                                |
| <b>27</b>               | 0.216283                         | -768.8635941                | 29.4769                              |
| <b>TS1</b>              | 0.393071                         | -1904.635919                | -790.1915                            |
| <b>TS2</b>              | 0.211486                         | -768.7790327                | -486.2878                            |
| <b>TS3</b>              | 0.215534                         | -768.8295676                | -259.5939                            |
| <b>14</b>               | 0.217063                         | -768.8657967                | 32.2568                              |
| <b>TSS<sub>DA</sub></b> | 0.355746                         | -1359.613052                | -298.8251                            |
| <b>15a</b>              | 0.360889                         | -1359.683688                | 23.345                               |
| <b>Maleimide</b>        | 0.113265                         | -590.7457677                | 58.9609                              |
| <b>Rh catalyst</b>      | 0.156699                         | -1135.79711                 | 39.4094                              |

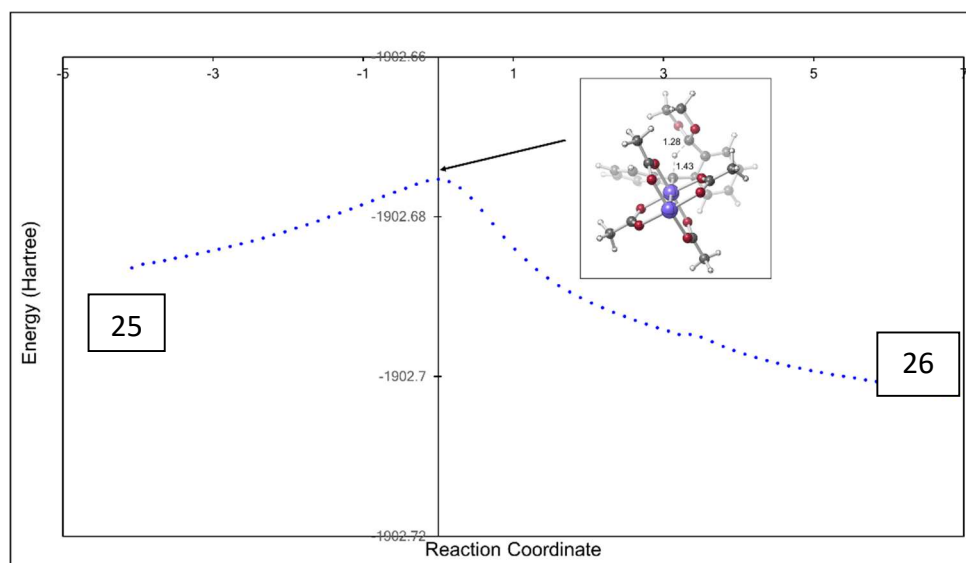

Figure CS2. IRC plot for hydride shift step (TS1).

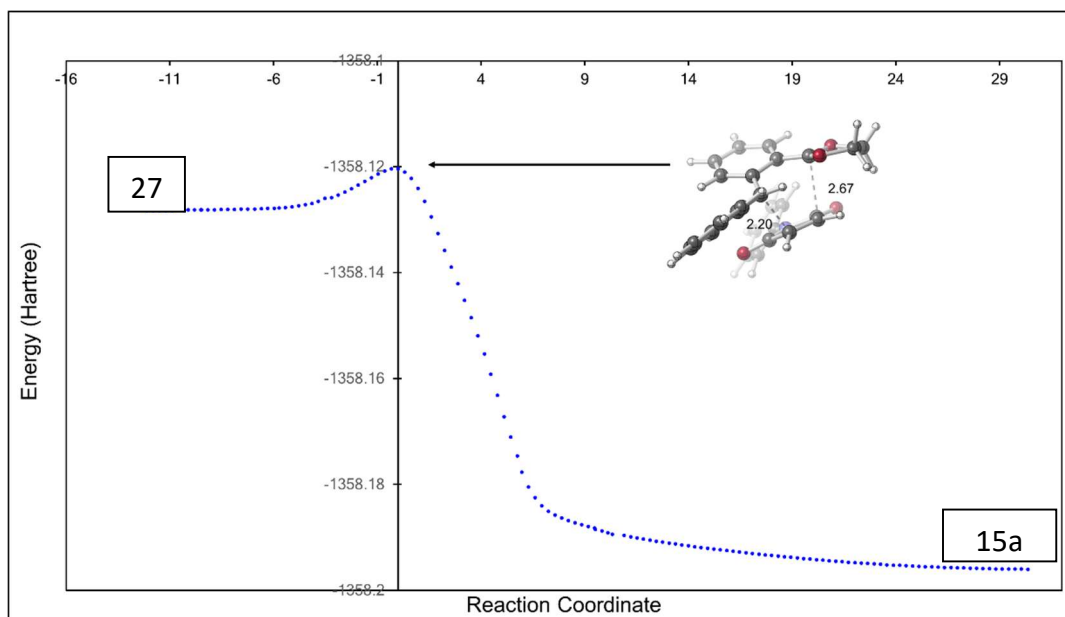

Figure CS3. IRC plot for Diels-Alder step with maleimide ( $TS_{DA}$ ).

### Computational Details for NMR Study.

Computed chemical shifts or coupling constants were produced for the diastereomers that may arise from the methodology described in the manuscript to provide stereochemical information for products **15o**, **16a**, **18c** and **18o**.

All significantly contributing conformers were located by calculating a conformational distribution for each molecule using *Spartan18*<sup>7</sup> software with molecular mechanics (MMFF) using the default parameters. All conformers found to be  $> 3.0$  kcal/mol than the lowest energy conformer were deemed statistically insignificant in their contributions to the computed chemical shifts and coupling constants of the molecule.

Computed chemical shifts and coupling constants were determined using *Gaussian16*<sup>1</sup> on all energetically relevant conformers. Geometry optimizations for computed chemical shifts were conducted at the B3LYP/6-31+G(d,p) level of theory in gas phase unless otherwise indicated. Computed chemical shifts were then determined from the optimized structure using the GIAO method at the B3LYP/6-311+G(2d,p) level of theory in chloroform or dichloromethane (SCRF). Computed coupling constants were obtained on structures optimized in the gas-phase at B3LYP/6-31G(d) level of theory. Subsequently, NMR single-point calculation in gas-phase was performed using the procedure published by Bally and Rablen on  $^1H$ - $^1H$  coupling constants on the optimized structure using the following command in the route section before the molecule specifications:<sup>8</sup>

```
#n B3LYP/6-31G(d,p) nmr=(fconly,readatoms) iop(3/10=1100000)
```

Then at the end of the molecule specifications, separated by a blank line, “atoms=H” (without quotation marks) was added in.

Computed chemical shifts and coupling constants were empirically scaled using the appropriate scaling factors, compiled by Rablen *et al.*, and made available on the <http://cheshirenmr.info> website. Empirical scaling using such methods were shown to reduce systematic error resulting from a variety of sources and is all delineated in this review.<sup>9</sup>

Where multiple conformations were considered, computed free energies at the indicated level of theory (see below) were used to calculate the relative % population of each conformer based on a Boltzmann-weighted average of the computed energies at a relatively high level of theory. These relative populations were then used as weighing factors for the computed chemical shifts of each conformer.

## 15o

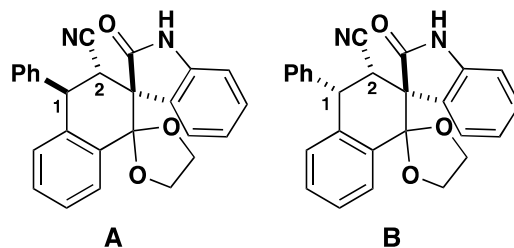

Coupling constants between hydrogens at C1 and C2 were calculated for diastereomers **A** and **B** using the methods described above and scaled by a factor of 0.9117 as recommended by Bally and Rablen.<sup>7</sup> The experimental H1-H2 coupling constant observed by <sup>1</sup>H NMR is 11.0 Hz.

**Table 1.** Coupling constants for both diastereomers of **15o**

|          | Computed Fermi Contact Terms (H1-H2) | Scaled Computed H1-H2 J Values (Hz) | Experimental H1-H2 J Value (Hz) | Standard Deviation (Hz) |
|----------|--------------------------------------|-------------------------------------|---------------------------------|-------------------------|
| <b>A</b> | 11.4942                              | 10.5229401                          | 11.0                            | 0.4770599               |
| <b>B</b> | 6.59437                              | 6.03                                | 11.0                            | 4.97                    |

Computed  $J$  value for **A** was significantly closer to the experimental  $J$  value observed and we concluded that **A** depicted the correct relative stereochemistry of **15o**.

### 16a

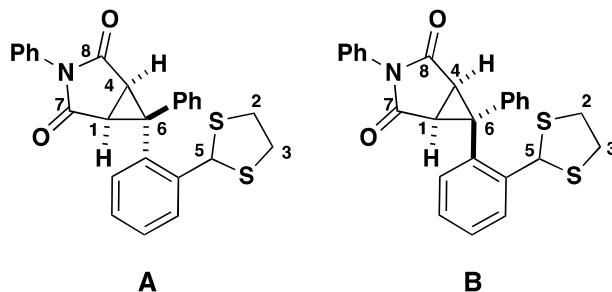

$^1\text{H}$  and  $^{13}\text{C}$  chemical shifts were computed for two conformers of diastereomers **A** and **B** (4 structures total). The computed chemical shifts of each conformer were averaged according to their relative populations derived from their relative free energies and then scaled using the procedure described in the computational NMR methods section using  $\text{CHCl}_3$  as implicit solvent whenever indicated. Computed  $^1\text{H}$  and  $^{13}\text{C}$  chemical shifts for **A** and **B** were compared with all the assignable observed chemical shifts for **8a** (measured in  $\text{CDCl}_3$ ). Computed chemical shifts of chemically equivalent atoms were averaged prior to comparison with experimental shifts.

Computed  $^1\text{H}$  chemical shifts for diastereomer **B** more consistently matched with the experimental data than computed chemical shifts for diastereomer **A**. Computed  $^{13}\text{C}$  chemical for **A** and **B** closely correlated to experimental data. Closer examination of H1 and C1 revealed a greater variation between the two sets of computed data for diastereomers **A** and **B**. Based on these observations, we concluded that **A** depicted the correct relative stereochemistry of **16a**.

**Table 2.** Computed  $^1\text{H}$  chemical shifts for **A**

| H # | Scaled Computed Chemical Shifts | Experimental Chemical Shifts |
|-----|---------------------------------|------------------------------|
| 1   | 3.041776706                     | 3.1                          |
| 2   | 3.42388724                      | 3.205                        |
| 2'  | 3.428787092                     | 3.37                         |
| 3   | 3.552485163                     | 3.37                         |
| 3'  | 3.699354599                     | 3.49                         |
| 4   | 3.19764095                      | 3.74                         |
| 5   | 6.86772997                      | 6.11                         |

**Table 3.** Computed  $^1\text{H}$  chemical shifts for **B**

| H # | Scaled Computed Chemical Shifts | Experimental Chemical Shifts |
|-----|---------------------------------|------------------------------|
| 1   | 2.67397997                      | 3.1                          |
| 2   | 3.23418954                      | 3.205                        |
| 2'  | 3.28869158                      | 3.37                         |
| 3   | 3.300871662                     | 3.37                         |
| 3'  | 3.492539874                     | 3.49                         |
| 4   | 3.440008346                     | 3.74                         |
| 5   | 6.318824184                     | 6.11                         |

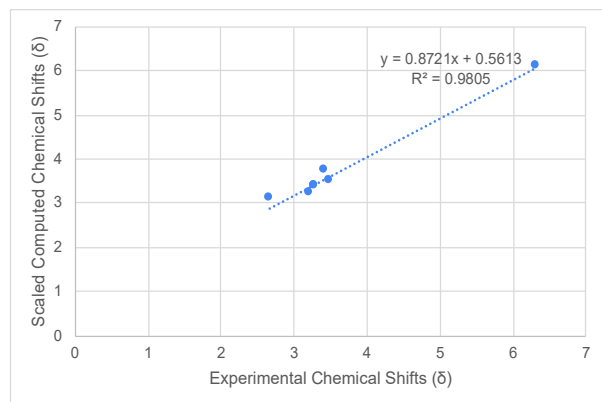

**Figure 1.** Correlation graph for computed  $^1\text{H}$  chemical shift of **A** and experimental  $^1\text{H}$  shifts.

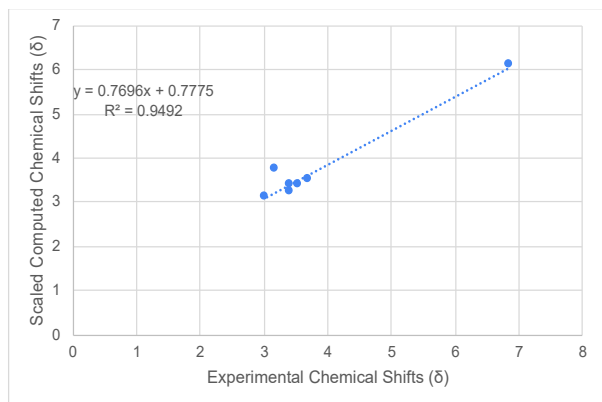

**Figure 2.** Correlation graph for computed  $^1\text{H}$  chemical shift of **B** and experimental  $^1\text{H}$  shift

**Table 4.** Computed  $^{13}\text{C}$  chemical shifts for **A**

| C # | Scaled Computed Chemical Shifts | Experimental Chemical Shifts |
|-----|---------------------------------|------------------------------|
| 1   | 35.17669166                     | 34.6                         |
| 4   | 35.59417671                     | 36.5                         |
| 2   | 46.04838189                     | 40.7                         |
| 3   | 46.69335864                     | 41.1                         |
| 6   | 52.7711341                      | 47.1                         |
| 5   | 66.70339945                     | 50.7                         |
| 7   | 170.7508133                     | 171.4                        |
| 8   | 170.8872582                     | 171.8                        |

**Table 5.** Computed  $^{13}\text{C}$  chemical shifts for **B**

| C # | Scaled Computed Chemical Shifts | Experimental Chemical Shifts |
|-----|---------------------------------|------------------------------|
| 1   | 33.91432571                     | 34.6                         |
| 4   | 36.4932049                      | 36.5                         |
| 2   | 46.32365949                     | 40.7                         |
| 3   | 48.19341369                     | 41.1                         |
| 6   | 52.89329506                     | 47.1                         |
| 5   | 62.4061118                      | 50.7                         |
| 7   | 170.7599886                     | 171.4                        |
| 8   | 170.980298                      | 171.8                        |

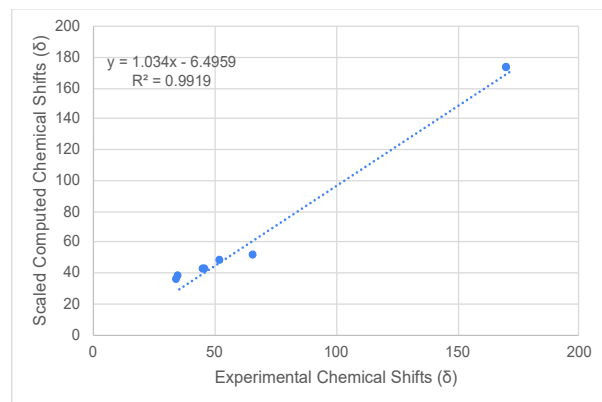

**Figure 3.** Correlation graph for computed  $^{13}\text{C}$  chemical shift of **A** and experimental  $^{13}\text{C}$  shifts.

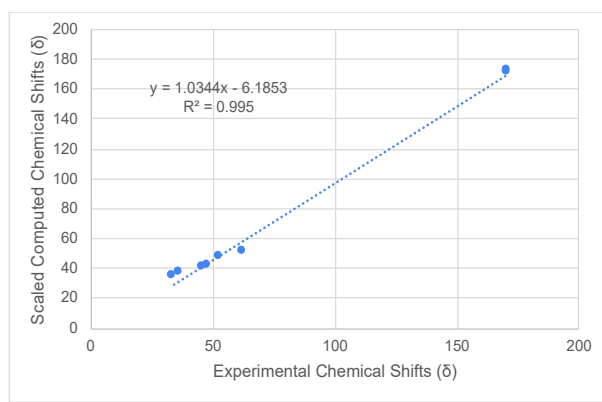

**Figure 4.** Correlation graph for computed  $^{13}\text{C}$  chemical shift of **B** and experimental  $^{13}\text{C}$  shifts.



## 18c

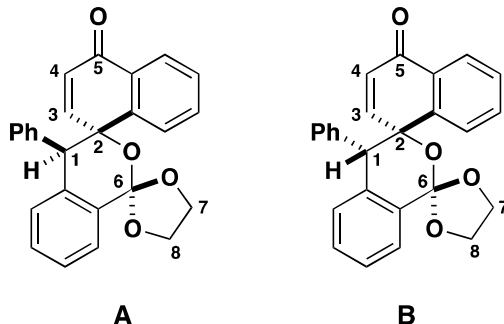

$^1\text{H}$  and  $^{13}\text{C}$  chemical shifts were computed for diastereomers **A** and **B** and scaled using the procedure described in the computational NMR methods section using  $\text{CH}_2\text{Cl}_2$  as implicit solvent whenever indicated. Computed  $^1\text{H}$  and  $^{13}\text{C}$  chemical shifts for **A** and **B** were compared with all the assignable observed chemical shifts for **18c** (measured in  $\text{CD}_2\text{Cl}_2$ ). Computed chemical shifts of chemically equivalent atoms were averaged prior to comparison with experimental shifts.

Computed chemical shifts for diastereomer **B** more consistently matched with the experimental data than computed chemical shifts for diastereomer **A**. Based off of the computed NMR shifts, combined with a crystal structure obtained of the major product, we concluded that **B** depicted the correct relative stereochemistry of **18c**.

**Table 6.** Computed  $^1\text{H}$  chemical shifts for **A**

| H # | Scaled Computed Chemical Shifts | Experimental Chemical Shifts |
|-----|---------------------------------|------------------------------|
| 1   | 3.965696958                     | 4.17                         |
| 7   | 4.26760163                      | 4.315                        |
| 7'  | 4.217568464                     | 4.315                        |
| 8   | 4.269307306                     | 4.315                        |
| 8'  | 4.308916896                     | 4.45                         |
| 4   | 6.173220885                     | 6.22                         |
| 3   | 7.9385009                       | 7.61                         |

**Table 7.** Computed  $^1\text{H}$  chemical shifts for **B**

| H # | Scaled Computed Chemical Shifts | Experimental Chemical Shifts |
|-----|---------------------------------|------------------------------|
| 1   | 4.98227992                      | 4.17                         |
| 7   | 4.107173316                     | 4.315                        |
| 7'  | 4.171894248                     | 4.315                        |
| 8   | 4.18857197                      | 4.315                        |
| 8'  | 4.18838245                      | 4.45                         |
| 4   | 6.212451436                     | 6.22                         |
| 3   | 7.840993083                     | 7.61                         |

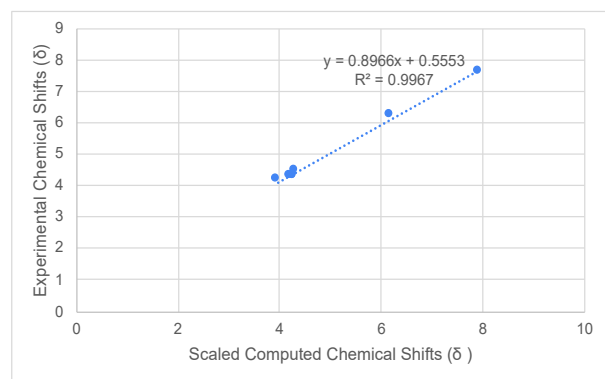

**Figure 5.** Correlation graph for computed  $^1\text{H}$  chemical shift of **A** and experimental  $^1\text{H}$  shifts.

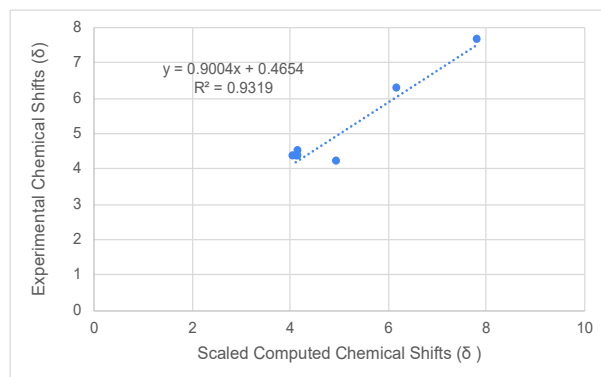

**Figure 6.** Correlation graph for computed  $^1\text{H}$  chemical shift of **B** and experimental  $^1\text{H}$  shifts.

**Table 8.** Computed  $^{13}\text{C}$  chemical shifts for **A**

| C # | Scaled Computed Chemical Shifts | Experimental Chemical Shifts |
|-----|---------------------------------|------------------------------|
| 1   | 61.56270895                     | 56.7                         |
| 7   | 63.9852899                      | 65                           |
| 8   | 65.79940778                     | 66.2                         |
| 2   | 79.97163053                     | 77.2                         |
| 6   | 122.0081192                     | 119                          |
| 5   | 180.5719744                     | 184.1                        |

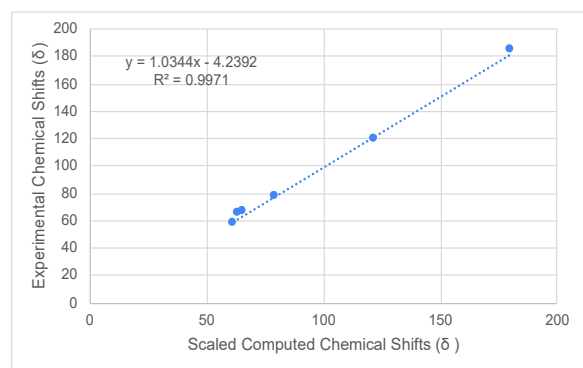

**Figure 7.** Correlation graph for computed  $^{13}\text{C}$  chemical shift of **A** and experimental  $^{13}\text{C}$  shifts.

**Table 9.** Computed  $^{13}\text{C}$  chemical shifts for **B**

| C # | Scaled Computed Chemical Shifts | Experimental Chemical Shifts |
|-----|---------------------------------|------------------------------|
| 1   | 61.29238705                     | 56.7                         |
| 7   | 63.5524883                      | 65                           |
| 8   | 65.78870952                     | 66.2                         |
| 2   | 80.54169453                     | 77.2                         |
| 6   | 121.6880313                     | 119                          |
| 5   | 179.7580476                     | 184.1                        |

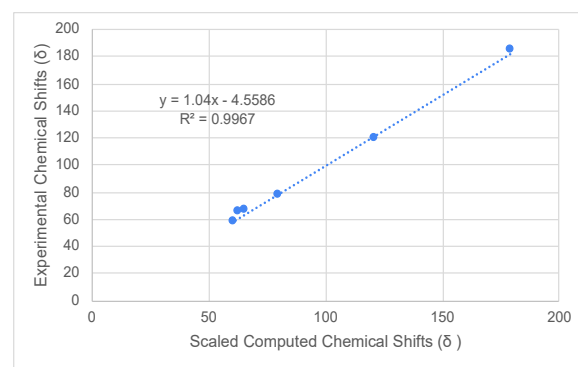

**Figure 8.** Correlation graph for computed  $^{13}\text{C}$  chemical shift of **B** and experimental  $^{13}\text{C}$  shifts.

## 18j

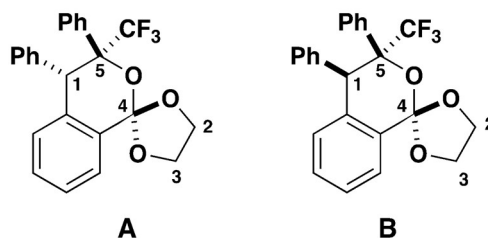

$^1\text{H}$  and  $^{13}\text{C}$  chemical shifts were computed for diastereomers **A** and **B** and scaled using the procedure described in the computational NMR methods section using  $\text{CHCl}_3$  as implicit solvent whenever indicated. Computed  $^1\text{H}$  and  $^{13}\text{C}$  chemical shifts for **A** and **B** were compared with all the assignable observed chemical shifts for **18j** (measured in  $\text{CDCl}_3$ ). Computed chemical shifts of chemically equivalent atoms were averaged prior to comparison with experimental shifts.

Computed chemical shifts for diastereomer **B** more consistently matched with the experimental data than computed chemical shifts for diastereomer **A**. From this, we concluded that **B** depicted the correct relative stereochemistry of **18j**.

**Table 10.** Computed  $^1\text{H}$  chemical shifts for **A**

| H # | Scaled Computed Chemical Shifts | Experimental Chemical Shifts |
|-----|---------------------------------|------------------------------|
| 2   | 4.09523368                      | 4.41                         |
| 2'  | 4.141876855                     | 4.41                         |
| 3   | 4.216431751                     | 4.535                        |
| 3'  | 4.254821958                     | 4.63                         |
| 1   | 4.265949555                     | 4.77                         |

**Table 11.** Computed  $^1\text{H}$  chemical shifts for **B**

| H # | Scaled Computed Chemical Shifts | Experimental Chemical Shifts |
|-----|---------------------------------|------------------------------|
| 2   | 4.170623145                     | 4.41                         |
| 2'  | 4.221439169                     | 4.41                         |
| 3   | 4.371939911                     | 4.535                        |
| 3'  | 4.414781157                     | 4.63                         |
| 1   | 4.617859792                     | 4.77                         |

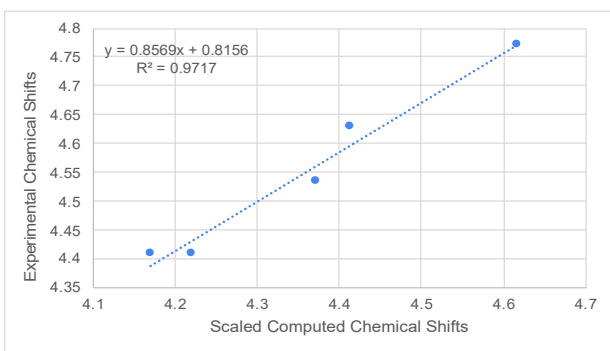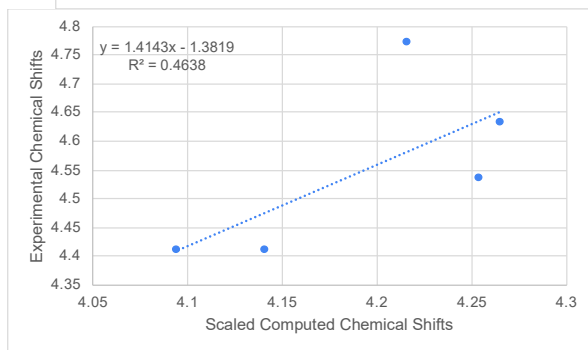

**Figure 9.** Correlation graph for computed  $^1\text{H}$  chemical shift of **A** and experimental  $^1\text{H}$  shifts.

**Figure 10.** Correlation graph for computed  $^1\text{H}$  chemical shift of **B** and experimental  $^1\text{H}$  shifts.

| C # | Scaled Computed Chemical Shifts | Experimental Chemical Shifts |
|-----|---------------------------------|------------------------------|
| 1   | 49.66261744                     | 47.3                         |
| 2   | 63.50033216                     | 64.8                         |
| 3   | 64.94581                        | 65.7                         |
| 5   | 82.82575686                     | 81.5                         |
| 4   | 120.9058556                     | 118.6                        |

**Table 12.** Computed  $^{13}\text{C}$  chemical shifts for **A**

| C # | Scaled Computed Chemical Shifts | Experimental Chemical Shifts |
|-----|---------------------------------|------------------------------|
| 1   | 56.91705419                     | 47.3                         |
| 2   | 63.25415204                     | 64.8                         |
| 3   | 65.10154693                     | 65.7                         |

**Table 13.** Computed  $^{13}\text{C}$  chemical shifts for **B**

|   |             |       |
|---|-------------|-------|
| 5 | 82.76368985 | 81.5  |
| 4 | 120.5818544 | 118.6 |

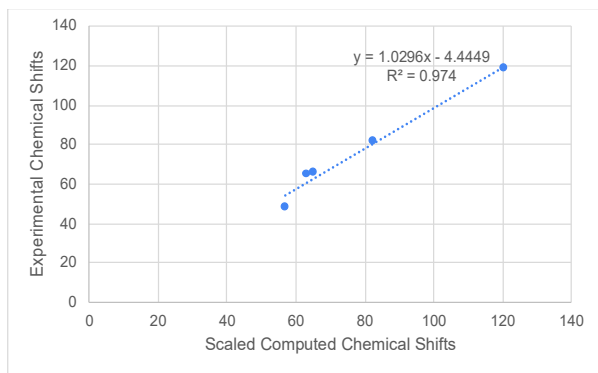

**Figure 11.** Correlation graph for computed  $^{13}\text{C}$  chemical shift of **A** and experimental  $^{13}\text{C}$  shifts.

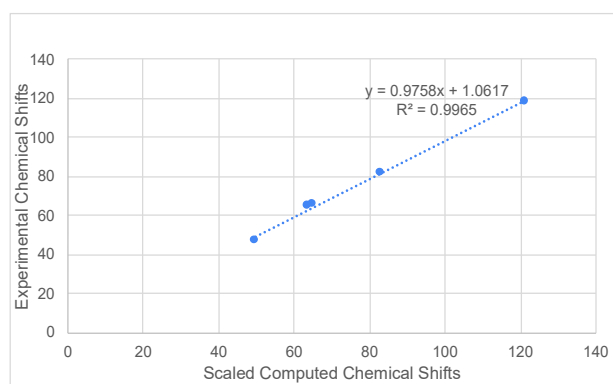

**Figure 12.** Correlation graph for computed  $^{13}\text{C}$  chemical shift of **B** and experimental  $^{13}\text{C}$  shifts.

## Computed Coordinates, Energies and Coupling Constants

15o

A

**G16 optfreq B3LYP/6-31G(d) gas-phase**

Sum of electronic and thermal Free Energies = -1337.620496 hartrees

| Center<br>Number | Atomic<br>Number | Atomic<br>Type | Coordinates (Angstroms) |           |           |
|------------------|------------------|----------------|-------------------------|-----------|-----------|
|                  |                  |                | X                       | Y         | Z         |
| 1                | 6                | 0              | 1.347710                | 4.076467  | 0.384380  |
| 2                | 6                | 0              | 0.188559                | 3.330958  | 0.165501  |
| 3                | 6                | 0              | 0.275236                | 1.967159  | -0.111709 |
| 4                | 6                | 0              | 1.523408                | 1.322276  | -0.146810 |
| 5                | 6                | 0              | 2.676922                | 2.080644  | 0.067057  |
| 6                | 6                | 0              | 2.590960                | 3.450185  | 0.328117  |
| 7                | 1                | 0              | 1.276718                | 5.139109  | 0.600125  |
| 8                | 1                | 0              | -0.789049               | 3.796500  | 0.221217  |
| 9                | 1                | 0              | 3.649322                | 1.601835  | 0.030964  |
| 10               | 1                | 0              | 3.500051                | 4.022600  | 0.492550  |
| 11               | 6                | 0              | 1.549010                | -0.163605 | -0.489503 |
| 12               | 6                | 0              | -0.951897               | 1.132137  | -0.422969 |
| 13               | 6                | 0              | 0.418436                | -0.938053 | 0.296185  |
| 14               | 1                | 0              | 0.788615                | -1.054761 | 1.319729  |
| 15               | 6                | 0              | -0.973100               | -0.195312 | 0.412461  |
| 16               | 8                | 0              | -2.144000               | 1.870342  | -0.193216 |
| 17               | 8                | 0              | -0.964252               | 0.759342  | -1.804689 |
| 18               | 6                | 0              | -2.864860               | 1.992645  | -1.424743 |
| 19               | 1                | 0              | -3.282179               | 3.002077  | -1.483798 |
| 20               | 1                | 0              | -3.674770               | 1.254976  | -1.459054 |
| 21               | 6                | 0              | -1.793667               | 1.707500  | -2.474205 |
| 22               | 1                | 0              | -1.223166               | 2.610886  | -2.730225 |
| 23               | 1                | 0              | -2.172359               | 1.240789  | -3.386350 |
| 24               | 6                | 0              | -2.236428               | -0.986479 | 0.111624  |
| 25               | 6                | 0              | -3.081040               | -0.934443 | 1.233320  |
| 26               | 6                | 0              | -2.666189               | -1.647095 | -1.032943 |
| 27               | 6                | 0              | -4.337154               | -1.527236 | 1.246204  |
| 28               | 6                | 0              | -3.928968               | -2.256800 | -1.038366 |
| 29               | 1                | 0              | -2.027578               | -1.702570 | -1.906340 |
| 30               | 6                | 0              | -4.751421               | -2.194575 | 0.087361  |
| 31               | 1                | 0              | -4.975497               | -1.477410 | 2.123734  |
| 32               | 1                | 0              | -4.263685               | -2.787282 | -1.924778 |
| 33               | 1                | 0              | -5.727084               | -2.672596 | 0.071127  |
| 34               | 7                | 0              | -2.447454               | -0.225182 | 2.260622  |
| 35               | 1                | 0              | -2.800412               | -0.110992 | 3.200595  |
| 36               | 6                | 0              | -1.183064               | 0.186920  | 1.912270  |
| 37               | 8                | 0              | -0.370896               | 0.710044  | 2.650484  |
| 38               | 6                | 0              | 0.295754                | -2.286718 | -0.268534 |
| 39               | 7                | 0              | 0.234415                | -3.349543 | -0.731745 |
| 40               | 6                | 0              | 2.888019                | -0.850863 | -0.267190 |
| 41               | 6                | 0              | 3.465813                | -0.925862 | 1.009967  |
| 42               | 6                | 0              | 3.561859                | -1.442234 | -1.341356 |
| 43               | 6                | 0              | 4.684005                | -1.575796 | 1.203351  |
| 44               | 1                | 0              | 2.965156                | -0.460413 | 1.855987  |
| 45               | 6                | 0              | 4.782363                | -2.093233 | -1.151063 |

|    |   |   |          |           |           |
|----|---|---|----------|-----------|-----------|
| 46 | 1 | 0 | 3.123097 | -1.399592 | -2.335288 |
| 47 | 6 | 0 | 5.346555 | -2.162454 | 0.122362  |
| 48 | 1 | 0 | 5.116338 | -1.623746 | 2.199310  |
| 49 | 1 | 0 | 5.287394 | -2.549390 | -1.998265 |
| 50 | 1 | 0 | 6.294925 | -2.670953 | 0.273742  |
| 51 | 1 | 0 | 1.297686 | -0.250601 | -1.552355 |

---

**G16 #n B3LYP/6-31G(d,p) nmr=(fconly,readatoms) iop(3/10=110000) gas-phase**

Fermi Contact (FC) contribution to J (Hz):

|    | 1            | 2            | 3            | 4            | 5            |
|----|--------------|--------------|--------------|--------------|--------------|
| 1  | 0.000000D+00 |              |              |              |              |
| 2  | 0.000000D+00 | 0.000000D+00 |              |              |              |
| 3  | 0.000000D+00 | 0.000000D+00 | 0.000000D+00 |              |              |
| 4  | 0.000000D+00 | 0.000000D+00 | 0.000000D+00 | 0.000000D+00 |              |
| 5  | 0.000000D+00 | 0.000000D+00 | 0.000000D+00 | 0.000000D+00 | 0.000000D+00 |
| 6  | 0.000000D+00 | 0.000000D+00 | 0.000000D+00 | 0.000000D+00 | 0.000000D+00 |
| 7  | 0.000000D+00 | 0.000000D+00 | 0.000000D+00 | 0.000000D+00 | 0.000000D+00 |
| 8  | 0.000000D+00 | 0.000000D+00 | 0.000000D+00 | 0.000000D+00 | 0.000000D+00 |
| 9  | 0.000000D+00 | 0.000000D+00 | 0.000000D+00 | 0.000000D+00 | 0.000000D+00 |
| 10 | 0.000000D+00 | 0.000000D+00 | 0.000000D+00 | 0.000000D+00 | 0.000000D+00 |
| 11 | 0.000000D+00 | 0.000000D+00 | 0.000000D+00 | 0.000000D+00 | 0.000000D+00 |
| 12 | 0.000000D+00 | 0.000000D+00 | 0.000000D+00 | 0.000000D+00 | 0.000000D+00 |
| 13 | 0.000000D+00 | 0.000000D+00 | 0.000000D+00 | 0.000000D+00 | 0.000000D+00 |
| 14 | 0.000000D+00 | 0.000000D+00 | 0.000000D+00 | 0.000000D+00 | 0.000000D+00 |
| 15 | 0.000000D+00 | 0.000000D+00 | 0.000000D+00 | 0.000000D+00 | 0.000000D+00 |
| 16 | 0.000000D+00 | 0.000000D+00 | 0.000000D+00 | 0.000000D+00 | 0.000000D+00 |
| 17 | 0.000000D+00 | 0.000000D+00 | 0.000000D+00 | 0.000000D+00 | 0.000000D+00 |
| 18 | 0.000000D+00 | 0.000000D+00 | 0.000000D+00 | 0.000000D+00 | 0.000000D+00 |
| 19 | 0.000000D+00 | 0.000000D+00 | 0.000000D+00 | 0.000000D+00 | 0.000000D+00 |
| 20 | 0.000000D+00 | 0.000000D+00 | 0.000000D+00 | 0.000000D+00 | 0.000000D+00 |
| 21 | 0.000000D+00 | 0.000000D+00 | 0.000000D+00 | 0.000000D+00 | 0.000000D+00 |
| 22 | 0.000000D+00 | 0.000000D+00 | 0.000000D+00 | 0.000000D+00 | 0.000000D+00 |
| 23 | 0.000000D+00 | 0.000000D+00 | 0.000000D+00 | 0.000000D+00 | 0.000000D+00 |
| 24 | 0.000000D+00 | 0.000000D+00 | 0.000000D+00 | 0.000000D+00 | 0.000000D+00 |
| 25 | 0.000000D+00 | 0.000000D+00 | 0.000000D+00 | 0.000000D+00 | 0.000000D+00 |
| 26 | 0.000000D+00 | 0.000000D+00 | 0.000000D+00 | 0.000000D+00 | 0.000000D+00 |
| 27 | 0.000000D+00 | 0.000000D+00 | 0.000000D+00 | 0.000000D+00 | 0.000000D+00 |
| 28 | 0.000000D+00 | 0.000000D+00 | 0.000000D+00 | 0.000000D+00 | 0.000000D+00 |
| 29 | 0.000000D+00 | 0.000000D+00 | 0.000000D+00 | 0.000000D+00 | 0.000000D+00 |
| 30 | 0.000000D+00 | 0.000000D+00 | 0.000000D+00 | 0.000000D+00 | 0.000000D+00 |
| 31 | 0.000000D+00 | 0.000000D+00 | 0.000000D+00 | 0.000000D+00 | 0.000000D+00 |
| 32 | 0.000000D+00 | 0.000000D+00 | 0.000000D+00 | 0.000000D+00 | 0.000000D+00 |
| 33 | 0.000000D+00 | 0.000000D+00 | 0.000000D+00 | 0.000000D+00 | 0.000000D+00 |
| 34 | 0.000000D+00 | 0.000000D+00 | 0.000000D+00 | 0.000000D+00 | 0.000000D+00 |
| 35 | 0.000000D+00 | 0.000000D+00 | 0.000000D+00 | 0.000000D+00 | 0.000000D+00 |
| 36 | 0.000000D+00 | 0.000000D+00 | 0.000000D+00 | 0.000000D+00 | 0.000000D+00 |
| 37 | 0.000000D+00 | 0.000000D+00 | 0.000000D+00 | 0.000000D+00 | 0.000000D+00 |
| 38 | 0.000000D+00 | 0.000000D+00 | 0.000000D+00 | 0.000000D+00 | 0.000000D+00 |
| 39 | 0.000000D+00 | 0.000000D+00 | 0.000000D+00 | 0.000000D+00 | 0.000000D+00 |
| 40 | 0.000000D+00 | 0.000000D+00 | 0.000000D+00 | 0.000000D+00 | 0.000000D+00 |
| 41 | 0.000000D+00 | 0.000000D+00 | 0.000000D+00 | 0.000000D+00 | 0.000000D+00 |
| 42 | 0.000000D+00 | 0.000000D+00 | 0.000000D+00 | 0.000000D+00 | 0.000000D+00 |
| 43 | 0.000000D+00 | 0.000000D+00 | 0.000000D+00 | 0.000000D+00 | 0.000000D+00 |
| 44 | 0.000000D+00 | 0.000000D+00 | 0.000000D+00 | 0.000000D+00 | 0.000000D+00 |
| 45 | 0.000000D+00 | 0.000000D+00 | 0.000000D+00 | 0.000000D+00 | 0.000000D+00 |
| 46 | 0.000000D+00 | 0.000000D+00 | 0.000000D+00 | 0.000000D+00 | 0.000000D+00 |

47 0.000000D+00 0.000000D+00 0.000000D+00 0.000000D+00 0.000000D+00  
48 0.000000D+00 0.000000D+00 0.000000D+00 0.000000D+00 0.000000D+00  
49 0.000000D+00 0.000000D+00 0.000000D+00 0.000000D+00 0.000000D+00  
50 0.000000D+00 0.000000D+00 0.000000D+00 0.000000D+00 0.000000D+00  
51 0.000000D+00 0.000000D+00 0.000000D+00 0.000000D+00 0.000000D+00  
6 7 8 9 10  
6 0.000000D+00  
7 0.000000D+00 0.385007D+12  
8 0.000000D+00 0.845315D+01 0.385007D+12  
9 0.000000D+00 0.118222D+01 0.537317D+00 0.385007D+12  
10 0.000000D+00 0.823168D+01 0.140169D+01 0.861700D+01 0.385007D+12  
11 0.000000D+00 0.000000D+00 0.000000D+00 0.000000D+00 0.000000D+00  
12 0.000000D+00 0.000000D+00 0.000000D+00 0.000000D+00 0.000000D+00  
13 0.000000D+00 0.000000D+00 0.000000D+00 0.000000D+00 0.000000D+00  
14 0.000000D+00 0.363274D-01 -0.280402D-01 0.705272D-01 -0.337568D-01  
15 0.000000D+00 0.000000D+00 0.000000D+00 0.000000D+00 0.000000D+00  
16 0.000000D+00 0.000000D+00 0.000000D+00 0.000000D+00 0.000000D+00  
17 0.000000D+00 0.000000D+00 0.000000D+00 0.000000D+00 0.000000D+00  
18 0.000000D+00 0.000000D+00 0.000000D+00 0.000000D+00 0.000000D+00  
19 0.000000D+00 0.112965D-01 0.216535D-01 -0.274826D-02 0.197495D-03  
20 0.000000D+00 -0.385085D-02 -0.602761D-02 0.222678D-01 0.167905D-02  
21 0.000000D+00 0.000000D+00 0.000000D+00 0.000000D+00 0.000000D+00  
22 0.000000D+00 -0.170575D-02 0.966473D-01 -0.159056D-01 0.116193D-01  
23 0.000000D+00 0.184771D-01 0.673136D-01 -0.177794D-02 -0.212891D-01  
24 0.000000D+00 0.000000D+00 0.000000D+00 0.000000D+00 0.000000D+00  
25 0.000000D+00 0.000000D+00 0.000000D+00 0.000000D+00 0.000000D+00  
26 0.000000D+00 0.000000D+00 0.000000D+00 0.000000D+00 0.000000D+00  
27 0.000000D+00 0.000000D+00 0.000000D+00 0.000000D+00 0.000000D+00  
28 0.000000D+00 0.000000D+00 0.000000D+00 0.000000D+00 0.000000D+00  
29 0.000000D+00 -0.117408D-02 0.385642D-02 -0.152091D-02 0.271715D-02  
30 0.000000D+00 0.000000D+00 0.000000D+00 0.000000D+00 0.000000D+00  
31 0.000000D+00 0.427281D-02 -0.197356D-02 0.110548D-02 -0.300704D-02  
32 0.000000D+00 0.210828D-02 -0.918428D-03 0.720785D-03 -0.177694D-02  
33 0.000000D+00 -0.393470D-02 0.124204D-02 -0.103342D-02 0.275225D-02  
34 0.000000D+00 0.000000D+00 0.000000D+00 0.000000D+00 0.000000D+00  
35 0.000000D+00 -0.848253D-03 0.999866D-03 -0.108844D-02 0.605094D-03  
36 0.000000D+00 0.000000D+00 0.000000D+00 0.000000D+00 0.000000D+00  
37 0.000000D+00 0.000000D+00 0.000000D+00 0.000000D+00 0.000000D+00  
38 0.000000D+00 0.000000D+00 0.000000D+00 0.000000D+00 0.000000D+00  
39 0.000000D+00 0.000000D+00 0.000000D+00 0.000000D+00 0.000000D+00  
40 0.000000D+00 0.000000D+00 0.000000D+00 0.000000D+00 0.000000D+00  
41 0.000000D+00 0.000000D+00 0.000000D+00 0.000000D+00 0.000000D+00  
42 0.000000D+00 0.000000D+00 0.000000D+00 0.000000D+00 0.000000D+00  
43 0.000000D+00 0.000000D+00 0.000000D+00 0.000000D+00 0.000000D+00  
44 0.000000D+00 0.729118D-02 -0.127896D-01 0.289104D+00 -0.211448D-01  
45 0.000000D+00 0.000000D+00 0.000000D+00 0.000000D+00 0.000000D+00  
46 0.000000D+00 -0.117366D-02 0.246950D-02 0.189836D-01 -0.554449D-02  
47 0.000000D+00 0.000000D+00 0.000000D+00 0.000000D+00 0.000000D+00  
48 0.000000D+00 -0.242325D-02 0.648777D-02 -0.278203D-01 0.590953D-02  
49 0.000000D+00 -0.212290D-03 0.131209D-01 -0.669994D-02 0.267277D-02  
50 0.000000D+00 -0.209571D-02 -0.741966D-02 0.131933D-01 -0.427931D-02  
51 0.000000D+00 -0.121335D+01 0.534733D+00 -0.151249D+01 0.635427D+00  
11 12 13 14 15  
11 0.000000D+00  
12 0.000000D+00 0.000000D+00  
13 0.000000D+00 0.000000D+00 0.000000D+00  
14 0.000000D+00 0.000000D+00 0.000000D+00 0.385007D+12  
15 0.000000D+00 0.000000D+00 0.000000D+00 0.000000D+00 0.000000D+00

16 0.000000D+00 0.000000D+00 0.000000D+00 0.000000D+00 0.000000D+00  
17 0.000000D+00 0.000000D+00 0.000000D+00 0.000000D+00 0.000000D+00  
18 0.000000D+00 0.000000D+00 0.000000D+00 0.000000D+00 0.000000D+00  
19 0.000000D+00 0.000000D+00 0.000000D+00 0.353725D-01 0.000000D+00  
20 0.000000D+00 0.000000D+00 0.000000D+00 -0.842895D-02 0.000000D+00  
21 0.000000D+00 0.000000D+00 0.000000D+00 0.000000D+00 0.000000D+00  
22 0.000000D+00 0.000000D+00 0.000000D+00 -0.792530D-03 0.000000D+00  
23 0.000000D+00 0.000000D+00 0.000000D+00 -0.615270D-02 0.000000D+00  
24 0.000000D+00 0.000000D+00 0.000000D+00 0.000000D+00 0.000000D+00  
25 0.000000D+00 0.000000D+00 0.000000D+00 0.000000D+00 0.000000D+00  
26 0.000000D+00 0.000000D+00 0.000000D+00 0.000000D+00 0.000000D+00  
27 0.000000D+00 0.000000D+00 0.000000D+00 0.000000D+00 0.000000D+00  
28 0.000000D+00 0.000000D+00 0.000000D+00 0.000000D+00 0.000000D+00  
29 0.000000D+00 0.000000D+00 0.000000D+00 0.105343D-01 0.000000D+00  
30 0.000000D+00 0.000000D+00 0.000000D+00 0.000000D+00 0.000000D+00  
31 0.000000D+00 0.000000D+00 0.000000D+00 -0.152216D-02 0.000000D+00  
32 0.000000D+00 0.000000D+00 0.000000D+00 0.572179D-02 0.000000D+00  
33 0.000000D+00 0.000000D+00 0.000000D+00 0.133304D-01 0.000000D+00  
34 0.000000D+00 0.000000D+00 0.000000D+00 0.000000D+00 0.000000D+00  
35 0.000000D+00 0.000000D+00 0.000000D+00 0.517560D+00 0.000000D+00  
36 0.000000D+00 0.000000D+00 0.000000D+00 0.000000D+00 0.000000D+00  
37 0.000000D+00 0.000000D+00 0.000000D+00 0.000000D+00 0.000000D+00  
38 0.000000D+00 0.000000D+00 0.000000D+00 0.000000D+00 0.000000D+00  
39 0.000000D+00 0.000000D+00 0.000000D+00 0.000000D+00 0.000000D+00  
40 0.000000D+00 0.000000D+00 0.000000D+00 0.000000D+00 0.000000D+00  
41 0.000000D+00 0.000000D+00 0.000000D+00 0.000000D+00 0.000000D+00  
42 0.000000D+00 0.000000D+00 0.000000D+00 0.000000D+00 0.000000D+00  
43 0.000000D+00 0.000000D+00 0.000000D+00 0.000000D+00 0.000000D+00  
44 0.000000D+00 0.000000D+00 0.000000D+00 -0.452777D+00 0.000000D+00  
45 0.000000D+00 0.000000D+00 0.000000D+00 0.000000D+00 0.000000D+00  
46 0.000000D+00 0.000000D+00 0.000000D+00 -0.333775D-02 0.000000D+00  
47 0.000000D+00 0.000000D+00 0.000000D+00 0.000000D+00 0.000000D+00  
48 0.000000D+00 0.000000D+00 0.000000D+00 0.583462D-02 0.000000D+00  
49 0.000000D+00 0.000000D+00 0.000000D+00 0.313752D-02 0.000000D+00  
50 0.000000D+00 0.000000D+00 0.000000D+00 0.160655D-01 0.000000D+00  
51 0.000000D+00 0.000000D+00 0.000000D+00 0.114942D+02 0.000000D+00

16 17 18 19 20

16 0.000000D+00  
17 0.000000D+00 0.000000D+00  
18 0.000000D+00 0.000000D+00 0.000000D+00  
19 0.000000D+00 0.000000D+00 0.000000D+00 0.385007D+12  
20 0.000000D+00 0.000000D+00 0.000000D+00 -0.725690D+01 0.385007D+12  
21 0.000000D+00 0.000000D+00 0.000000D+00 0.000000D+00 0.000000D+00  
22 0.000000D+00 0.000000D+00 0.000000D+00 0.625127D+01 0.117318D+02  
23 0.000000D+00 0.000000D+00 0.000000D+00 0.828558D+00 0.599350D+01  
24 0.000000D+00 0.000000D+00 0.000000D+00 0.000000D+00 0.000000D+00  
25 0.000000D+00 0.000000D+00 0.000000D+00 0.000000D+00 0.000000D+00  
26 0.000000D+00 0.000000D+00 0.000000D+00 0.000000D+00 0.000000D+00  
27 0.000000D+00 0.000000D+00 0.000000D+00 0.000000D+00 0.000000D+00  
28 0.000000D+00 0.000000D+00 0.000000D+00 0.000000D+00 0.000000D+00  
29 0.000000D+00 0.000000D+00 0.000000D+00 0.335058D-01 0.422173D-01  
30 0.000000D+00 0.000000D+00 0.000000D+00 0.000000D+00 0.000000D+00  
31 0.000000D+00 0.000000D+00 0.000000D+00 -0.504935D-02 -0.400904D-02  
32 0.000000D+00 0.000000D+00 0.000000D+00 -0.709870D-02 -0.502213D-02  
33 0.000000D+00 0.000000D+00 0.000000D+00 0.186555D-02 0.550792D-03  
34 0.000000D+00 0.000000D+00 0.000000D+00 0.000000D+00 0.000000D+00  
35 0.000000D+00 0.000000D+00 0.000000D+00 -0.261856D-03 0.112882D-02  
36 0.000000D+00 0.000000D+00 0.000000D+00 0.000000D+00 0.000000D+00



37 0.000000D+00 0.000000D+00 0.000000D+00 0.000000D+00 0.000000D+00  
38 0.000000D+00 0.000000D+00 0.000000D+00 0.000000D+00 0.000000D+00  
39 0.000000D+00 0.000000D+00 0.000000D+00 0.000000D+00 0.000000D+00  
40 0.000000D+00 0.000000D+00 0.000000D+00 0.000000D+00 0.000000D+00  
41 0.000000D+00 0.000000D+00 0.000000D+00 0.000000D+00 0.000000D+00  
42 0.000000D+00 0.000000D+00 0.000000D+00 0.000000D+00 0.000000D+00  
43 0.000000D+00 0.000000D+00 0.000000D+00 0.000000D+00 0.000000D+00  
44 0.000000D+00 0.000000D+00 0.000000D+00 0.245675D-02 0.129127D-05  
45 0.000000D+00 0.000000D+00 0.000000D+00 0.000000D+00 0.000000D+00  
46 0.000000D+00 0.000000D+00 0.000000D+00 0.239920D-03 -0.508091D-04  
47 0.000000D+00 0.000000D+00 0.000000D+00 0.000000D+00 0.000000D+00  
48 0.000000D+00 0.000000D+00 0.000000D+00 0.135606D-03 -0.794904D-04  
49 0.000000D+00 0.000000D+00 0.000000D+00 -0.209523D-03 0.370582D-05  
50 0.000000D+00 0.000000D+00 0.000000D+00 0.231174D-03 -0.143930D-04  
51 0.000000D+00 0.000000D+00 0.000000D+00 -0.501085D-02 -0.509139D-02  
21 22 23 24 25  
21 0.000000D+00  
22 0.000000D+00 0.385007D+12  
23 0.000000D+00 -0.841417D+01 0.385007D+12  
24 0.000000D+00 0.000000D+00 0.000000D+00 0.000000D+00  
25 0.000000D+00 0.000000D+00 0.000000D+00 0.000000D+00 0.000000D+00  
26 0.000000D+00 0.000000D+00 0.000000D+00 0.000000D+00 0.000000D+00  
27 0.000000D+00 0.000000D+00 0.000000D+00 0.000000D+00 0.000000D+00  
28 0.000000D+00 0.000000D+00 0.000000D+00 0.000000D+00 0.000000D+00  
29 0.000000D+00 -0.228464D-01 0.176957D-01 0.000000D+00 0.000000D+00  
30 0.000000D+00 0.000000D+00 0.000000D+00 0.000000D+00 0.000000D+00  
31 0.000000D+00 0.108405D-02 -0.158318D-03 0.000000D+00 0.000000D+00  
32 0.000000D+00 -0.117328D-02 0.867300D-03 0.000000D+00 0.000000D+00  
33 0.000000D+00 0.106331D-02 -0.176006D-03 0.000000D+00 0.000000D+00  
34 0.000000D+00 0.000000D+00 0.000000D+00 0.000000D+00 0.000000D+00  
35 0.000000D+00 -0.328739D-02 0.416513D-02 0.000000D+00 0.000000D+00  
36 0.000000D+00 0.000000D+00 0.000000D+00 0.000000D+00 0.000000D+00  
37 0.000000D+00 0.000000D+00 0.000000D+00 0.000000D+00 0.000000D+00  
38 0.000000D+00 0.000000D+00 0.000000D+00 0.000000D+00 0.000000D+00  
39 0.000000D+00 0.000000D+00 0.000000D+00 0.000000D+00 0.000000D+00  
40 0.000000D+00 0.000000D+00 0.000000D+00 0.000000D+00 0.000000D+00  
41 0.000000D+00 0.000000D+00 0.000000D+00 0.000000D+00 0.000000D+00  
42 0.000000D+00 0.000000D+00 0.000000D+00 0.000000D+00 0.000000D+00  
43 0.000000D+00 0.000000D+00 0.000000D+00 0.000000D+00 0.000000D+00  
44 0.000000D+00 0.404002D-03 0.258102D-03 0.000000D+00 0.000000D+00  
45 0.000000D+00 0.000000D+00 0.000000D+00 0.000000D+00 0.000000D+00  
46 0.000000D+00 -0.157619D-03 0.173964D-03 0.000000D+00 0.000000D+00  
47 0.000000D+00 0.000000D+00 0.000000D+00 0.000000D+00 0.000000D+00  
48 0.000000D+00 -0.176699D-03 -0.345239D-03 0.000000D+00 0.000000D+00  
49 0.000000D+00 0.483458D-04 0.105397D-04 0.000000D+00 0.000000D+00  
50 0.000000D+00 -0.149359D-03 0.163584D-03 0.000000D+00 0.000000D+00  
51 0.000000D+00 -0.158488D-01 0.844985D-02 0.000000D+00 0.000000D+00  
26 27 28 29 30  
26 0.000000D+00  
27 0.000000D+00 0.000000D+00  
28 0.000000D+00 0.000000D+00 0.000000D+00  
29 0.000000D+00 0.000000D+00 0.000000D+00 0.385007D+12  
30 0.000000D+00 0.000000D+00 0.000000D+00 0.000000D+00 0.000000D+00  
31 0.000000D+00 0.000000D+00 0.000000D+00 0.590922D+00 0.000000D+00  
32 0.000000D+00 0.000000D+00 0.000000D+00 0.852722D+01 0.000000D+00  
33 0.000000D+00 0.000000D+00 0.000000D+00 0.121889D+01 0.000000D+00  
34 0.000000D+00 0.000000D+00 0.000000D+00 0.000000D+00 0.000000D+00  
35 0.000000D+00 0.000000D+00 0.000000D+00 0.776904D+00 0.000000D+00

36 0.000000D+00 0.000000D+00 0.000000D+00 0.000000D+00 0.000000D+00  
37 0.000000D+00 0.000000D+00 0.000000D+00 0.000000D+00 0.000000D+00  
38 0.000000D+00 0.000000D+00 0.000000D+00 0.000000D+00 0.000000D+00  
39 0.000000D+00 0.000000D+00 0.000000D+00 0.000000D+00 0.000000D+00  
40 0.000000D+00 0.000000D+00 0.000000D+00 0.000000D+00 0.000000D+00  
41 0.000000D+00 0.000000D+00 0.000000D+00 0.000000D+00 0.000000D+00  
42 0.000000D+00 0.000000D+00 0.000000D+00 0.000000D+00 0.000000D+00  
43 0.000000D+00 0.000000D+00 0.000000D+00 0.000000D+00 0.000000D+00  
44 0.000000D+00 0.000000D+00 0.000000D+00 0.891567D-03 0.000000D+00  
45 0.000000D+00 0.000000D+00 0.000000D+00 0.000000D+00 0.000000D+00  
46 0.000000D+00 0.000000D+00 0.000000D+00 0.172916D-02 0.000000D+00  
47 0.000000D+00 0.000000D+00 0.000000D+00 0.000000D+00 0.000000D+00  
48 0.000000D+00 0.000000D+00 0.000000D+00 -0.234956D-03 0.000000D+00  
49 0.000000D+00 0.000000D+00 0.000000D+00 -0.297049D-03 0.000000D+00  
50 0.000000D+00 0.000000D+00 0.000000D+00 0.649667D-03 0.000000D+00  
51 0.000000D+00 0.000000D+00 0.000000D+00 -0.489845D-02 0.000000D+00

31 32 33 34 35

31 0.385007D+12  
32 0.106875D+01 0.385007D+12  
33 0.858406D+01 0.846453D+01 0.385007D+12  
34 0.000000D+00 0.000000D+00 0.000000D+00 0.000000D+00  
35 0.160719D+00 0.641355D-01 -0.826281D-01 0.000000D+00 0.385007D+12  
36 0.000000D+00 0.000000D+00 0.000000D+00 0.000000D+00 0.000000D+00  
37 0.000000D+00 0.000000D+00 0.000000D+00 0.000000D+00 0.000000D+00  
38 0.000000D+00 0.000000D+00 0.000000D+00 0.000000D+00 0.000000D+00  
39 0.000000D+00 0.000000D+00 0.000000D+00 0.000000D+00 0.000000D+00  
40 0.000000D+00 0.000000D+00 0.000000D+00 0.000000D+00 0.000000D+00  
41 0.000000D+00 0.000000D+00 0.000000D+00 0.000000D+00 0.000000D+00  
42 0.000000D+00 0.000000D+00 0.000000D+00 0.000000D+00 0.000000D+00  
43 0.000000D+00 0.000000D+00 0.000000D+00 0.000000D+00 0.000000D+00  
44 -0.127944D-02 -0.357341D-03 0.892362D-03 0.000000D+00 0.316180D-02  
45 0.000000D+00 0.000000D+00 0.000000D+00 0.000000D+00 0.000000D+00  
46 -0.818946D-03 -0.297859D-03 0.670710D-03 0.000000D+00 -0.334750D-03  
47 0.000000D+00 0.000000D+00 0.000000D+00 0.000000D+00 0.000000D+00  
48 0.575315D-03 0.159231D-03 -0.389687D-03 0.000000D+00 0.539560D-03  
49 0.120881D-02 0.314354D-03 -0.738882D-03 0.000000D+00 0.131287D-02  
50 -0.124058D-02 -0.366278D-03 0.902297D-03 0.000000D+00 -0.136856D-02  
51 0.362024D-02 0.333765D-03 -0.944969D-03 0.000000D+00 -0.218797D-01

36 37 38 39 40

36 0.000000D+00  
37 0.000000D+00 0.000000D+00  
38 0.000000D+00 0.000000D+00 0.000000D+00  
39 0.000000D+00 0.000000D+00 0.000000D+00 0.000000D+00  
40 0.000000D+00 0.000000D+00 0.000000D+00 0.000000D+00 0.000000D+00  
41 0.000000D+00 0.000000D+00 0.000000D+00 0.000000D+00 0.000000D+00  
42 0.000000D+00 0.000000D+00 0.000000D+00 0.000000D+00 0.000000D+00  
43 0.000000D+00 0.000000D+00 0.000000D+00 0.000000D+00 0.000000D+00  
44 0.000000D+00 0.000000D+00 0.000000D+00 0.000000D+00 0.000000D+00  
45 0.000000D+00 0.000000D+00 0.000000D+00 0.000000D+00 0.000000D+00  
46 0.000000D+00 0.000000D+00 0.000000D+00 0.000000D+00 0.000000D+00  
47 0.000000D+00 0.000000D+00 0.000000D+00 0.000000D+00 0.000000D+00  
48 0.000000D+00 0.000000D+00 0.000000D+00 0.000000D+00 0.000000D+00  
49 0.000000D+00 0.000000D+00 0.000000D+00 0.000000D+00 0.000000D+00  
50 0.000000D+00 0.000000D+00 0.000000D+00 0.000000D+00 0.000000D+00  
51 0.000000D+00 0.000000D+00 0.000000D+00 0.000000D+00 0.000000D+00

41 42 43 44 45

41 0.000000D+00  
42 0.000000D+00 0.000000D+00

```

43 0.000000D+00 0.000000D+00 0.000000D+00
44 0.000000D+00 0.000000D+00 0.000000D+00 0.385007D+12
45 0.000000D+00 0.000000D+00 0.000000D+00 0.000000D+00 0.000000D+00
46 0.000000D+00 0.000000D+00 0.000000D+00 0.193672D+01 0.000000D+00
47 0.000000D+00 0.000000D+00 0.000000D+00 0.000000D+00 0.000000D+00
48 0.000000D+00 0.000000D+00 0.000000D+00 0.872652D+01 0.000000D+00
49 0.000000D+00 0.000000D+00 0.000000D+00 0.624231D+00 0.000000D+00
50 0.000000D+00 0.000000D+00 0.000000D+00 0.117119D+01 0.000000D+00
51 0.000000D+00 0.000000D+00 0.000000D+00 -0.308743D+00 0.000000D+00
    46    47    48    49    50
46 0.385007D+12
47 0.000000D+00 0.000000D+00
48 0.590820D+00 0.000000D+00 0.385007D+12
49 0.841662D+01 0.000000D+00 0.139217D+01 0.385007D+12
50 0.119046D+01 0.000000D+00 0.815287D+01 0.833866D+01 0.385007D+12
51 -0.469505D+00 0.000000D+00 0.436658D+00 0.855333D-01 -0.514197D-01
    51
51 0.385007D+12

```

## **B**

### **G16 optfreq B3LYP/6-31G(d) gas-phase**

HF = -1337.617752

| Center<br>Number | Atomic<br>Number | Atomic<br>Type | Coordinates (Angstroms) |           |           |
|------------------|------------------|----------------|-------------------------|-----------|-----------|
|                  |                  |                | X                       | Y         | Z         |
| 1                | 6                | 0              | 1.503978                | 4.060092  | 0.198196  |
| 2                | 6                | 0              | 0.330761                | 3.327887  | 0.047386  |
| 3                | 6                | 0              | 0.337614                | 1.927685  | 0.101397  |
| 4                | 6                | 0              | 1.545180                | 1.246933  | 0.339479  |
| 5                | 6                | 0              | 2.718303                | 1.999410  | 0.496489  |
| 6                | 6                | 0              | 2.706850                | 3.389108  | 0.417740  |
| 7                | 1                | 0              | 1.476899                | 5.145511  | 0.154480  |
| 8                | 1                | 0              | -0.613236               | 3.843405  | -0.088925 |
| 9                | 1                | 0              | 3.652699                | 1.483316  | 0.692432  |
| 10               | 1                | 0              | 3.632515                | 3.944707  | 0.542242  |
| 11               | 6                | 0              | 1.584963                | -0.255253 | 0.605902  |
| 12               | 1                | 0              | 1.486284                | -0.347214 | 1.692785  |
| 13               | 6                | 0              | -0.965034               | 1.189398  | -0.199113 |
| 14               | 6                | 0              | 0.328787                | -1.007600 | 0.052610  |
| 15               | 1                | 0              | 0.293076                | -1.983415 | 0.554215  |
| 16               | 6                | 0              | -1.005992               | -0.257304 | 0.387548  |
| 17               | 8                | 0              | -2.078018               | 1.933591  | 0.289144  |
| 18               | 8                | 0              | -1.135564               | 1.086609  | -1.614611 |
| 19               | 6                | 0              | -2.999550               | 2.155115  | -0.783454 |
| 20               | 1                | 0              | -3.447790               | 3.143632  | -0.647754 |
| 21               | 1                | 0              | -3.785471               | 1.390937  | -0.777922 |
| 22               | 6                | 0              | -2.110119               | 2.044763  | -2.018668 |
| 23               | 1                | 0              | -1.632533               | 3.001987  | -2.268349 |
| 24               | 1                | 0              | -2.621758               | 1.654689  | -2.902189 |
| 25               | 6                | 0              | -2.257748               | -1.027937 | -0.016720 |
| 26               | 6                | 0              | -3.016397               | -1.302624 | 1.133732  |
| 27               | 6                | 0              | -2.722243               | -1.463805 | -1.253959 |
| 28               | 6                | 0              | -4.221686               | -1.991958 | 1.087183  |
| 29               | 6                | 0              | -3.936207               | -2.163560 | -1.321199 |
| 30               | 1                | 0              | -2.151981               | -1.269763 | -2.153751 |

|    |   |   |           |           |           |
|----|---|---|-----------|-----------|-----------|
| 31 | 6 | 0 | -4.675134 | -2.420575 | -0.165785 |
| 32 | 1 | 0 | -4.791693 | -2.192799 | 1.989876  |
| 33 | 1 | 0 | -4.300092 | -2.509334 | -2.284214 |
| 34 | 1 | 0 | -5.614032 | -2.963396 | -0.232956 |
| 35 | 7 | 0 | -2.356475 | -0.791906 | 2.255372  |
| 36 | 1 | 0 | -2.697074 | -0.823731 | 3.206355  |
| 37 | 6 | 0 | -1.176253 | -0.158939 | 1.940914  |
| 38 | 8 | 0 | -0.425295 | 0.357442  | 2.747021  |
| 39 | 6 | 0 | 0.440852  | -1.313203 | -1.383553 |
| 40 | 7 | 0 | 0.548585  | -1.605634 | -2.501648 |
| 41 | 6 | 0 | 2.876823  | -0.965721 | 0.220166  |
| 42 | 6 | 0 | 3.464487  | -1.853128 | 1.131446  |
| 43 | 6 | 0 | 3.489535  | -0.787492 | -1.029059 |
| 44 | 6 | 0 | 4.628475  | -2.551960 | 0.807184  |
| 45 | 1 | 0 | 3.007216  | -1.994480 | 2.108790  |
| 46 | 6 | 0 | 4.653743  | -1.482534 | -1.354903 |
| 47 | 1 | 0 | 3.054322  | -0.101275 | -1.748655 |
| 48 | 6 | 0 | 5.226628  | -2.367989 | -0.439479 |
| 49 | 1 | 0 | 5.068423  | -3.233435 | 1.530601  |
| 50 | 1 | 0 | 5.112390  | -1.332815 | -2.328624 |
| 51 | 1 | 0 | 6.134396  | -2.907755 | -0.695818 |

-----

**G16 #n B3LYP/6-31G(d,p) nmr=(fonly,readatoms) iop(3/10=110000) gas-phase**

Fermi Contact (FC) contribution to J (Hz):

|    | 1            | 2            | 3            | 4            | 5            |
|----|--------------|--------------|--------------|--------------|--------------|
| 1  | 0.000000D+00 |              |              |              |              |
| 2  | 0.000000D+00 | 0.000000D+00 |              |              |              |
| 3  | 0.000000D+00 | 0.000000D+00 | 0.000000D+00 |              |              |
| 4  | 0.000000D+00 | 0.000000D+00 | 0.000000D+00 | 0.000000D+00 |              |
| 5  | 0.000000D+00 | 0.000000D+00 | 0.000000D+00 | 0.000000D+00 | 0.000000D+00 |
| 6  | 0.000000D+00 | 0.000000D+00 | 0.000000D+00 | 0.000000D+00 | 0.000000D+00 |
| 7  | 0.000000D+00 | 0.000000D+00 | 0.000000D+00 | 0.000000D+00 | 0.000000D+00 |
| 8  | 0.000000D+00 | 0.000000D+00 | 0.000000D+00 | 0.000000D+00 | 0.000000D+00 |
| 9  | 0.000000D+00 | 0.000000D+00 | 0.000000D+00 | 0.000000D+00 | 0.000000D+00 |
| 10 | 0.000000D+00 | 0.000000D+00 | 0.000000D+00 | 0.000000D+00 | 0.000000D+00 |
| 11 | 0.000000D+00 | 0.000000D+00 | 0.000000D+00 | 0.000000D+00 | 0.000000D+00 |
| 12 | 0.000000D+00 | 0.000000D+00 | 0.000000D+00 | 0.000000D+00 | 0.000000D+00 |
| 13 | 0.000000D+00 | 0.000000D+00 | 0.000000D+00 | 0.000000D+00 | 0.000000D+00 |
| 14 | 0.000000D+00 | 0.000000D+00 | 0.000000D+00 | 0.000000D+00 | 0.000000D+00 |
| 15 | 0.000000D+00 | 0.000000D+00 | 0.000000D+00 | 0.000000D+00 | 0.000000D+00 |
| 16 | 0.000000D+00 | 0.000000D+00 | 0.000000D+00 | 0.000000D+00 | 0.000000D+00 |
| 17 | 0.000000D+00 | 0.000000D+00 | 0.000000D+00 | 0.000000D+00 | 0.000000D+00 |
| 18 | 0.000000D+00 | 0.000000D+00 | 0.000000D+00 | 0.000000D+00 | 0.000000D+00 |
| 19 | 0.000000D+00 | 0.000000D+00 | 0.000000D+00 | 0.000000D+00 | 0.000000D+00 |
| 20 | 0.000000D+00 | 0.000000D+00 | 0.000000D+00 | 0.000000D+00 | 0.000000D+00 |
| 21 | 0.000000D+00 | 0.000000D+00 | 0.000000D+00 | 0.000000D+00 | 0.000000D+00 |
| 22 | 0.000000D+00 | 0.000000D+00 | 0.000000D+00 | 0.000000D+00 | 0.000000D+00 |
| 23 | 0.000000D+00 | 0.000000D+00 | 0.000000D+00 | 0.000000D+00 | 0.000000D+00 |
| 24 | 0.000000D+00 | 0.000000D+00 | 0.000000D+00 | 0.000000D+00 | 0.000000D+00 |
| 25 | 0.000000D+00 | 0.000000D+00 | 0.000000D+00 | 0.000000D+00 | 0.000000D+00 |
| 26 | 0.000000D+00 | 0.000000D+00 | 0.000000D+00 | 0.000000D+00 | 0.000000D+00 |
| 27 | 0.000000D+00 | 0.000000D+00 | 0.000000D+00 | 0.000000D+00 | 0.000000D+00 |
| 28 | 0.000000D+00 | 0.000000D+00 | 0.000000D+00 | 0.000000D+00 | 0.000000D+00 |

29 0.000000D+00 0.000000D+00 0.000000D+00 0.000000D+00 0.000000D+00  
30 0.000000D+00 0.000000D+00 0.000000D+00 0.000000D+00 0.000000D+00  
31 0.000000D+00 0.000000D+00 0.000000D+00 0.000000D+00 0.000000D+00  
32 0.000000D+00 0.000000D+00 0.000000D+00 0.000000D+00 0.000000D+00  
33 0.000000D+00 0.000000D+00 0.000000D+00 0.000000D+00 0.000000D+00  
34 0.000000D+00 0.000000D+00 0.000000D+00 0.000000D+00 0.000000D+00  
35 0.000000D+00 0.000000D+00 0.000000D+00 0.000000D+00 0.000000D+00  
36 0.000000D+00 0.000000D+00 0.000000D+00 0.000000D+00 0.000000D+00  
37 0.000000D+00 0.000000D+00 0.000000D+00 0.000000D+00 0.000000D+00  
38 0.000000D+00 0.000000D+00 0.000000D+00 0.000000D+00 0.000000D+00  
39 0.000000D+00 0.000000D+00 0.000000D+00 0.000000D+00 0.000000D+00  
40 0.000000D+00 0.000000D+00 0.000000D+00 0.000000D+00 0.000000D+00  
41 0.000000D+00 0.000000D+00 0.000000D+00 0.000000D+00 0.000000D+00  
42 0.000000D+00 0.000000D+00 0.000000D+00 0.000000D+00 0.000000D+00  
43 0.000000D+00 0.000000D+00 0.000000D+00 0.000000D+00 0.000000D+00  
44 0.000000D+00 0.000000D+00 0.000000D+00 0.000000D+00 0.000000D+00  
45 0.000000D+00 0.000000D+00 0.000000D+00 0.000000D+00 0.000000D+00  
46 0.000000D+00 0.000000D+00 0.000000D+00 0.000000D+00 0.000000D+00  
47 0.000000D+00 0.000000D+00 0.000000D+00 0.000000D+00 0.000000D+00  
48 0.000000D+00 0.000000D+00 0.000000D+00 0.000000D+00 0.000000D+00  
49 0.000000D+00 0.000000D+00 0.000000D+00 0.000000D+00 0.000000D+00  
50 0.000000D+00 0.000000D+00 0.000000D+00 0.000000D+00 0.000000D+00  
51 0.000000D+00 0.000000D+00 0.000000D+00 0.000000D+00 0.000000D+00  
6 0.000000D+00  
7 0.000000D+00 0.385007D+12  
8 0.000000D+00 0.875205D+01 0.385007D+12  
9 0.000000D+00 0.127996D+01 0.528908D+00 0.385007D+12  
10 0.000000D+00 0.805253D+01 0.138538D+01 0.876728D+01 0.385007D+12  
11 0.000000D+00 0.000000D+00 0.000000D+00 0.000000D+00 0.000000D+00  
12 0.000000D+00 -0.131015D+01 0.604200D+00 -0.153043D+01 0.611313D+00  
13 0.000000D+00 0.000000D+00 0.000000D+00 0.000000D+00 0.000000D+00  
14 0.000000D+00 0.000000D+00 0.000000D+00 0.000000D+00 0.000000D+00  
15 0.000000D+00 0.290702D-01 -0.378154D-01 0.133801D+00 0.762594D-01  
16 0.000000D+00 0.000000D+00 0.000000D+00 0.000000D+00 0.000000D+00  
17 0.000000D+00 0.000000D+00 0.000000D+00 0.000000D+00 0.000000D+00  
18 0.000000D+00 0.000000D+00 0.000000D+00 0.000000D+00 0.000000D+00  
19 0.000000D+00 0.000000D+00 0.000000D+00 0.000000D+00 0.000000D+00  
20 0.000000D+00 0.782513D-02 0.333513D-01 0.152578D-02 -0.596040D-02  
21 0.000000D+00 -0.576173D-02 0.319033D-01 0.176376D-01 -0.423441D-02  
22 0.000000D+00 0.000000D+00 0.000000D+00 0.000000D+00 0.000000D+00  
23 0.000000D+00 -0.274344D-02 -0.347489D-01 -0.405250D-02 0.191819D-02  
24 0.000000D+00 0.188973D-01 0.162515D+00 0.280042D-01 -0.538932D-01  
25 0.000000D+00 0.000000D+00 0.000000D+00 0.000000D+00 0.000000D+00  
26 0.000000D+00 0.000000D+00 0.000000D+00 0.000000D+00 0.000000D+00  
27 0.000000D+00 0.000000D+00 0.000000D+00 0.000000D+00 0.000000D+00  
28 0.000000D+00 0.000000D+00 0.000000D+00 0.000000D+00 0.000000D+00  
29 0.000000D+00 0.000000D+00 0.000000D+00 0.000000D+00 0.000000D+00  
30 0.000000D+00 0.868179D-03 0.192528D-02 -0.878644D-03 0.956784D-03  
31 0.000000D+00 0.000000D+00 0.000000D+00 0.000000D+00 0.000000D+00  
32 0.000000D+00 0.469988D-02 0.481328D-03 -0.119924D-03 -0.588132D-03  
33 0.000000D+00 0.158531D-02 0.116440D-03 0.219251D-03 -0.540120D-03  
34 0.000000D+00 -0.312531D-02 -0.849245D-04 -0.179513D-03 0.744490D-03

35 0.000000D+00 0.000000D+00 0.000000D+00 0.000000D+00 0.000000D+00  
36 0.000000D+00 0.328092D-04 -0.105441D-02 0.324493D-03 -0.115185D-02  
37 0.000000D+00 0.000000D+00 0.000000D+00 0.000000D+00 0.000000D+00  
38 0.000000D+00 0.000000D+00 0.000000D+00 0.000000D+00 0.000000D+00  
39 0.000000D+00 0.000000D+00 0.000000D+00 0.000000D+00 0.000000D+00  
40 0.000000D+00 0.000000D+00 0.000000D+00 0.000000D+00 0.000000D+00  
41 0.000000D+00 0.000000D+00 0.000000D+00 0.000000D+00 0.000000D+00  
42 0.000000D+00 0.000000D+00 0.000000D+00 0.000000D+00 0.000000D+00  
43 0.000000D+00 0.000000D+00 0.000000D+00 0.000000D+00 0.000000D+00  
44 0.000000D+00 0.000000D+00 0.000000D+00 0.000000D+00 0.000000D+00  
45 0.000000D+00 0.194002D-02 0.670134D-02 0.210627D-01 -0.754920D-02  
46 0.000000D+00 0.000000D+00 0.000000D+00 0.000000D+00 0.000000D+00  
47 0.000000D+00 0.746896D-02 -0.743137D-02 0.260444D+00 -0.268660D-01  
48 0.000000D+00 0.000000D+00 0.000000D+00 0.000000D+00 0.000000D+00  
49 0.000000D+00 -0.258385D-02 0.136200D-01 -0.111076D-01 0.478707D-02  
50 0.000000D+00 -0.640661D-02 0.580564D-02 -0.321592D-01 0.864858D-02  
51 0.000000D+00 -0.174603D-02 -0.305519D-02 0.959397D-02 -0.542876D-02  
11 12 13 14 15  
11 0.000000D+00  
12 0.000000D+00 0.385007D+12  
13 0.000000D+00 0.000000D+00 0.000000D+00  
14 0.000000D+00 0.000000D+00 0.000000D+00 0.000000D+00  
15 0.000000D+00 0.659437D+01 0.000000D+00 0.000000D+00 0.385007D+12  
16 0.000000D+00 0.000000D+00 0.000000D+00 0.000000D+00 0.000000D+00  
17 0.000000D+00 0.000000D+00 0.000000D+00 0.000000D+00 0.000000D+00  
18 0.000000D+00 0.000000D+00 0.000000D+00 0.000000D+00 0.000000D+00  
19 0.000000D+00 0.000000D+00 0.000000D+00 0.000000D+00 0.000000D+00  
20 0.000000D+00 0.942687D-02 0.000000D+00 0.000000D+00 0.168942D+00  
21 0.000000D+00 0.928524D-02 0.000000D+00 0.000000D+00 -0.122611D-01  
22 0.000000D+00 0.000000D+00 0.000000D+00 0.000000D+00 0.000000D+00  
23 0.000000D+00 -0.107135D-01 0.000000D+00 0.000000D+00 0.181106D-01  
24 0.000000D+00 0.816233D-01 0.000000D+00 0.000000D+00 -0.850254D-02  
25 0.000000D+00 0.000000D+00 0.000000D+00 0.000000D+00 0.000000D+00  
26 0.000000D+00 0.000000D+00 0.000000D+00 0.000000D+00 0.000000D+00  
27 0.000000D+00 0.000000D+00 0.000000D+00 0.000000D+00 0.000000D+00  
28 0.000000D+00 0.000000D+00 0.000000D+00 0.000000D+00 0.000000D+00  
29 0.000000D+00 0.000000D+00 0.000000D+00 0.000000D+00 0.000000D+00  
30 0.000000D+00 0.832890D-02 0.000000D+00 0.000000D+00 0.724035D-01  
31 0.000000D+00 0.000000D+00 0.000000D+00 0.000000D+00 0.000000D+00  
32 0.000000D+00 -0.774056D-03 0.000000D+00 0.000000D+00 -0.449199D-02  
33 0.000000D+00 0.289920D-03 0.000000D+00 0.000000D+00 -0.137021D-01  
34 0.000000D+00 -0.266581D-02 0.000000D+00 0.000000D+00 0.305917D-01  
35 0.000000D+00 0.000000D+00 0.000000D+00 0.000000D+00 0.000000D+00  
36 0.000000D+00 0.817424D-03 0.000000D+00 0.000000D+00 0.183725D+00  
37 0.000000D+00 0.000000D+00 0.000000D+00 0.000000D+00 0.000000D+00  
38 0.000000D+00 0.000000D+00 0.000000D+00 0.000000D+00 0.000000D+00  
39 0.000000D+00 0.000000D+00 0.000000D+00 0.000000D+00 0.000000D+00  
40 0.000000D+00 0.000000D+00 0.000000D+00 0.000000D+00 0.000000D+00  
41 0.000000D+00 0.000000D+00 0.000000D+00 0.000000D+00 0.000000D+00  
42 0.000000D+00 0.000000D+00 0.000000D+00 0.000000D+00 0.000000D+00  
43 0.000000D+00 0.000000D+00 0.000000D+00 0.000000D+00 0.000000D+00  
44 0.000000D+00 0.000000D+00 0.000000D+00 0.000000D+00 0.000000D+00  
45 0.000000D+00 -0.591945D+00 0.000000D+00 0.000000D+00 0.372165D-01

46 0.000000D+00 0.000000D+00 0.000000D+00 0.000000D+00 0.000000D+00  
47 0.000000D+00 -0.387348D+00 0.000000D+00 0.000000D+00 0.498423D-01  
48 0.000000D+00 0.000000D+00 0.000000D+00 0.000000D+00 0.000000D+00  
49 0.000000D+00 0.156078D+00 0.000000D+00 0.000000D+00 -0.190120D-01  
50 0.000000D+00 0.388191D+00 0.000000D+00 0.000000D+00 -0.214399D-01  
51 0.000000D+00 -0.169819D+00 0.000000D+00 0.000000D+00 0.311086D-01  
16 17 18 19 20  
16 0.000000D+00  
17 0.000000D+00 0.000000D+00  
18 0.000000D+00 0.000000D+00 0.000000D+00  
19 0.000000D+00 0.000000D+00 0.000000D+00 0.000000D+00  
20 0.000000D+00 0.000000D+00 0.000000D+00 0.000000D+00 0.385007D+12  
21 0.000000D+00 0.000000D+00 0.000000D+00 0.000000D+00 -0.748150D+01  
22 0.000000D+00 0.000000D+00 0.000000D+00 0.000000D+00 0.000000D+00  
23 0.000000D+00 0.000000D+00 0.000000D+00 0.000000D+00 0.638367D+01  
24 0.000000D+00 0.000000D+00 0.000000D+00 0.000000D+00 0.955258D+00  
25 0.000000D+00 0.000000D+00 0.000000D+00 0.000000D+00 0.000000D+00  
26 0.000000D+00 0.000000D+00 0.000000D+00 0.000000D+00 0.000000D+00  
27 0.000000D+00 0.000000D+00 0.000000D+00 0.000000D+00 0.000000D+00  
28 0.000000D+00 0.000000D+00 0.000000D+00 0.000000D+00 0.000000D+00  
29 0.000000D+00 0.000000D+00 0.000000D+00 0.000000D+00 0.000000D+00  
30 0.000000D+00 0.000000D+00 0.000000D+00 0.000000D+00 0.100054D-01  
31 0.000000D+00 0.000000D+00 0.000000D+00 0.000000D+00 0.000000D+00  
32 0.000000D+00 0.000000D+00 0.000000D+00 0.000000D+00 0.168946D-02  
33 0.000000D+00 0.000000D+00 0.000000D+00 0.000000D+00 0.942408D-03  
34 0.000000D+00 0.000000D+00 0.000000D+00 0.000000D+00 -0.853703D-02  
35 0.000000D+00 0.000000D+00 0.000000D+00 0.000000D+00 0.000000D+00  
36 0.000000D+00 0.000000D+00 0.000000D+00 0.000000D+00 -0.283413D-02  
37 0.000000D+00 0.000000D+00 0.000000D+00 0.000000D+00 0.000000D+00  
38 0.000000D+00 0.000000D+00 0.000000D+00 0.000000D+00 0.000000D+00  
39 0.000000D+00 0.000000D+00 0.000000D+00 0.000000D+00 0.000000D+00  
40 0.000000D+00 0.000000D+00 0.000000D+00 0.000000D+00 0.000000D+00  
41 0.000000D+00 0.000000D+00 0.000000D+00 0.000000D+00 0.000000D+00  
42 0.000000D+00 0.000000D+00 0.000000D+00 0.000000D+00 0.000000D+00  
43 0.000000D+00 0.000000D+00 0.000000D+00 0.000000D+00 0.000000D+00  
44 0.000000D+00 0.000000D+00 0.000000D+00 0.000000D+00 0.000000D+00  
45 0.000000D+00 0.000000D+00 0.000000D+00 0.000000D+00 -0.292086D-03  
46 0.000000D+00 0.000000D+00 0.000000D+00 0.000000D+00 0.000000D+00  
47 0.000000D+00 0.000000D+00 0.000000D+00 0.000000D+00 -0.290578D-03  
48 0.000000D+00 0.000000D+00 0.000000D+00 0.000000D+00 0.000000D+00  
49 0.000000D+00 0.000000D+00 0.000000D+00 0.000000D+00 0.941213D-04  
50 0.000000D+00 0.000000D+00 0.000000D+00 0.000000D+00 0.191685D-03  
51 0.000000D+00 0.000000D+00 0.000000D+00 0.000000D+00 -0.367218D-03  
21 22 23 24 25  
21 0.385007D+12  
22 0.000000D+00 0.000000D+00  
23 0.116536D+02 0.000000D+00 0.385007D+12  
24 0.620044D+01 0.000000D+00 -0.846732D+01 0.385007D+12  
25 0.000000D+00 0.000000D+00 0.000000D+00 0.000000D+00 0.000000D+00  
26 0.000000D+00 0.000000D+00 0.000000D+00 0.000000D+00 0.000000D+00  
27 0.000000D+00 0.000000D+00 0.000000D+00 0.000000D+00 0.000000D+00  
28 0.000000D+00 0.000000D+00 0.000000D+00 0.000000D+00 0.000000D+00  
29 0.000000D+00 0.000000D+00 0.000000D+00 0.000000D+00 0.000000D+00

30 0.294068D-01 0.000000D+00 -0.251421D-01 0.222130D-01 0.000000D+00  
31 0.000000D+00 0.000000D+00 0.000000D+00 0.000000D+00 0.000000D+00  
32 0.938784D-03 0.000000D+00 0.923682D-03 -0.720655D-03 0.000000D+00  
33 -0.133582D-02 0.000000D+00 0.512310D-03 0.167094D-02 0.000000D+00  
34 -0.601258D-02 0.000000D+00 -0.257432D-04 0.641178D-03 0.000000D+00  
35 0.000000D+00 0.000000D+00 0.000000D+00 0.000000D+00 0.000000D+00  
36 -0.451014D-02 0.000000D+00 0.921734D-02 0.308608D-02 0.000000D+00  
37 0.000000D+00 0.000000D+00 0.000000D+00 0.000000D+00 0.000000D+00  
38 0.000000D+00 0.000000D+00 0.000000D+00 0.000000D+00 0.000000D+00  
39 0.000000D+00 0.000000D+00 0.000000D+00 0.000000D+00 0.000000D+00  
40 0.000000D+00 0.000000D+00 0.000000D+00 0.000000D+00 0.000000D+00  
41 0.000000D+00 0.000000D+00 0.000000D+00 0.000000D+00 0.000000D+00  
42 0.000000D+00 0.000000D+00 0.000000D+00 0.000000D+00 0.000000D+00  
43 0.000000D+00 0.000000D+00 0.000000D+00 0.000000D+00 0.000000D+00  
44 0.000000D+00 0.000000D+00 0.000000D+00 0.000000D+00 0.000000D+00  
45 0.229231D-04 0.000000D+00 -0.106410D-03 -0.827058D-05 0.000000D+00  
46 0.000000D+00 0.000000D+00 0.000000D+00 0.000000D+00 0.000000D+00  
47 -0.505888D-04 0.000000D+00 0.374321D-03 0.120753D-02 0.000000D+00  
48 0.000000D+00 0.000000D+00 0.000000D+00 0.000000D+00 0.000000D+00  
49 -0.110781D-04 0.000000D+00 0.607043D-04 0.893252D-04 0.000000D+00  
50 0.177321D-04 0.000000D+00 0.555760D-04 0.329599D-03 0.000000D+00  
51 0.332069D-04 0.000000D+00 0.210575D-05 0.304484D-03 0.000000D+00

26 0.000000D+00  
27 0.000000D+00 0.000000D+00  
28 0.000000D+00 0.000000D+00 0.000000D+00  
29 0.000000D+00 0.000000D+00 0.000000D+00 0.000000D+00  
30 0.000000D+00 0.000000D+00 0.000000D+00 0.000000D+00 0.385007D+12  
31 0.000000D+00 0.000000D+00 0.000000D+00 0.000000D+00 0.000000D+00  
32 0.000000D+00 0.000000D+00 0.000000D+00 0.000000D+00 0.593364D+00  
33 0.000000D+00 0.000000D+00 0.000000D+00 0.000000D+00 0.862782D+01  
34 0.000000D+00 0.000000D+00 0.000000D+00 0.000000D+00 0.122358D+01  
35 0.000000D+00 0.000000D+00 0.000000D+00 0.000000D+00 0.000000D+00  
36 0.000000D+00 0.000000D+00 0.000000D+00 0.000000D+00 0.741845D+00  
37 0.000000D+00 0.000000D+00 0.000000D+00 0.000000D+00 0.000000D+00  
38 0.000000D+00 0.000000D+00 0.000000D+00 0.000000D+00 0.000000D+00  
39 0.000000D+00 0.000000D+00 0.000000D+00 0.000000D+00 0.000000D+00  
40 0.000000D+00 0.000000D+00 0.000000D+00 0.000000D+00 0.000000D+00  
41 0.000000D+00 0.000000D+00 0.000000D+00 0.000000D+00 0.000000D+00  
42 0.000000D+00 0.000000D+00 0.000000D+00 0.000000D+00 0.000000D+00  
43 0.000000D+00 0.000000D+00 0.000000D+00 0.000000D+00 0.000000D+00  
44 0.000000D+00 0.000000D+00 0.000000D+00 0.000000D+00 0.000000D+00  
45 0.000000D+00 0.000000D+00 0.000000D+00 0.000000D+00 0.112382D-02  
46 0.000000D+00 0.000000D+00 0.000000D+00 0.000000D+00 0.000000D+00  
47 0.000000D+00 0.000000D+00 0.000000D+00 0.000000D+00 0.205672D-02  
48 0.000000D+00 0.000000D+00 0.000000D+00 0.000000D+00 0.000000D+00  
49 0.000000D+00 0.000000D+00 0.000000D+00 0.000000D+00 -0.652379D-03  
50 0.000000D+00 0.000000D+00 0.000000D+00 0.000000D+00 -0.361157D-03  
51 0.000000D+00 0.000000D+00 0.000000D+00 0.000000D+00 0.816757D-03

31 0.000000D+00  
32 0.000000D+00 0.385007D+12  
33 0.000000D+00 0.108942D+01 0.385007D+12



34 0.000000D+00 0.857654D+01 0.845181D+01 0.385007D+12  
35 0.000000D+00 0.000000D+00 0.000000D+00 0.000000D+00 0.000000D+00  
36 0.000000D+00 0.171302D+00 0.757629D-01 -0.864912D-01 0.000000D+00  
37 0.000000D+00 0.000000D+00 0.000000D+00 0.000000D+00 0.000000D+00  
38 0.000000D+00 0.000000D+00 0.000000D+00 0.000000D+00 0.000000D+00  
39 0.000000D+00 0.000000D+00 0.000000D+00 0.000000D+00 0.000000D+00  
40 0.000000D+00 0.000000D+00 0.000000D+00 0.000000D+00 0.000000D+00  
41 0.000000D+00 0.000000D+00 0.000000D+00 0.000000D+00 0.000000D+00  
42 0.000000D+00 0.000000D+00 0.000000D+00 0.000000D+00 0.000000D+00  
43 0.000000D+00 0.000000D+00 0.000000D+00 0.000000D+00 0.000000D+00  
44 0.000000D+00 0.000000D+00 0.000000D+00 0.000000D+00 0.000000D+00  
45 0.000000D+00 -0.691348D-03 -0.532684D-03 0.903175D-03 0.000000D+00  
46 0.000000D+00 0.000000D+00 0.000000D+00 0.000000D+00 0.000000D+00  
47 0.000000D+00 -0.856007D-03 -0.696059D-03 0.103041D-02 0.000000D+00  
48 0.000000D+00 0.000000D+00 0.000000D+00 0.000000D+00 0.000000D+00  
49 0.000000D+00 0.110755D-02 0.592726D-03 -0.114517D-02 0.000000D+00  
50 0.000000D+00 0.977992D-03 0.381569D-03 -0.842073D-03 0.000000D+00  
51 0.000000D+00 -0.148430D-02 -0.712125D-03 0.131299D-02 0.000000D+00

36 37 38 39 40

36 0.385007D+12  
37 0.000000D+00 0.000000D+00  
38 0.000000D+00 0.000000D+00 0.000000D+00  
39 0.000000D+00 0.000000D+00 0.000000D+00 0.000000D+00  
40 0.000000D+00 0.000000D+00 0.000000D+00 0.000000D+00 0.000000D+00  
41 0.000000D+00 0.000000D+00 0.000000D+00 0.000000D+00 0.000000D+00  
42 0.000000D+00 0.000000D+00 0.000000D+00 0.000000D+00 0.000000D+00  
43 0.000000D+00 0.000000D+00 0.000000D+00 0.000000D+00 0.000000D+00  
44 0.000000D+00 0.000000D+00 0.000000D+00 0.000000D+00 0.000000D+00  
45 -0.196894D-04 0.000000D+00 0.000000D+00 0.000000D+00 0.000000D+00  
46 0.000000D+00 0.000000D+00 0.000000D+00 0.000000D+00 0.000000D+00  
47 -0.128644D-03 0.000000D+00 0.000000D+00 0.000000D+00 0.000000D+00  
48 0.000000D+00 0.000000D+00 0.000000D+00 0.000000D+00 0.000000D+00  
49 -0.312275D-04 0.000000D+00 0.000000D+00 0.000000D+00 0.000000D+00  
50 -0.129662D-03 0.000000D+00 0.000000D+00 0.000000D+00 0.000000D+00  
51 0.125305D-03 0.000000D+00 0.000000D+00 0.000000D+00 0.000000D+00

41 42 43 44 45

41 0.000000D+00  
42 0.000000D+00 0.000000D+00  
43 0.000000D+00 0.000000D+00 0.000000D+00  
44 0.000000D+00 0.000000D+00 0.000000D+00 0.000000D+00  
45 0.000000D+00 0.000000D+00 0.000000D+00 0.000000D+00 0.385007D+12  
46 0.000000D+00 0.000000D+00 0.000000D+00 0.000000D+00 0.000000D+00  
47 0.000000D+00 0.000000D+00 0.000000D+00 0.000000D+00 0.195875D+01  
48 0.000000D+00 0.000000D+00 0.000000D+00 0.000000D+00 0.000000D+00  
49 0.000000D+00 0.000000D+00 0.000000D+00 0.000000D+00 0.839360D+01  
50 0.000000D+00 0.000000D+00 0.000000D+00 0.000000D+00 0.585367D+00  
51 0.000000D+00 0.000000D+00 0.000000D+00 0.000000D+00 0.120281D+01

46 47 48 49 50

46 0.000000D+00  
47 0.000000D+00 0.385007D+12  
48 0.000000D+00 0.000000D+00 0.000000D+00  
49 0.000000D+00 0.629729D+00 0.000000D+00 0.385007D+12  
50 0.000000D+00 0.882030D+01 0.000000D+00 0.141821D+01 0.385007D+12

51 0.000000D+00 0.116232D+01 0.000000D+00 0.828814D+01 0.818140D+01  
51  
51 0.385007D+12

**18c**

**A (Conformer 1)**

**G16 optfreq B3LYP/6-31G(d,p) gas-phase**

Sum of electronic and thermal Free Energies= -2004.673046

---

| Center<br>Number | Atomic<br>Number | Atomic<br>Type | Coordinates (Angstroms) |           |           |
|------------------|------------------|----------------|-------------------------|-----------|-----------|
|                  |                  |                | X                       | Y         | Z         |
| 1                | 6                | 0              | -1.655430               | 1.504604  | -0.520464 |
| 2                | 6                | 0              | -4.188843               | 2.727035  | -0.656605 |
| 3                | 6                | 0              | -2.823593               | 0.732265  | -0.339570 |
| 4                | 6                | 0              | -1.788634               | 2.881736  | -0.759567 |
| 5                | 6                | 0              | -3.035468               | 3.493809  | -0.828329 |
| 6                | 6                | 0              | -4.075109               | 1.363244  | -0.415718 |
| 7                | 1                | 0              | -0.891837               | 3.478903  | -0.893810 |
| 8                | 1                | 0              | -3.105384               | 4.561076  | -1.015718 |
| 9                | 1                | 0              | -4.965647               | 0.759847  | -0.273907 |
| 10               | 1                | 0              | -5.170080               | 3.188745  | -0.708613 |
| 11               | 6                | 0              | -0.245892               | 0.942740  | -0.415557 |
| 12               | 6                | 0              | 0.121607                | -0.180031 | -1.383335 |
| 13               | 6                | 0              | 0.643179                | 1.206688  | -1.632296 |
| 14               | 1                | 0              | -0.646746               | -0.649267 | -1.986936 |
| 15               | 1                | 0              | 0.282654                | 1.848625  | -2.426713 |
| 16               | 6                | 0              | 0.341468                | 1.016947  | 0.981409  |
| 17               | 6                | 0              | 1.332988                | 1.249156  | 3.601544  |
| 18               | 6                | 0              | 1.016356                | 2.175522  | 1.390575  |
| 19               | 6                | 0              | 0.172009                | -0.025223 | 1.902873  |
| 20               | 6                | 0              | 0.665418                | 0.090708  | 3.203356  |
| 21               | 6                | 0              | 1.509627                | 2.290608  | 2.689725  |
| 22               | 1                | 0              | 1.172922                | 2.983678  | 0.682730  |
| 23               | 1                | 0              | -0.339798               | -0.936182 | 1.611136  |
| 24               | 1                | 0              | 0.524709                | -0.727225 | 3.903630  |
| 25               | 1                | 0              | 2.036792                | 3.192540  | 2.986036  |
| 26               | 1                | 0              | 1.717211                | 1.337857  | 4.613329  |
| 27               | 6                | 0              | -2.774120               | -0.761040 | -0.092420 |
| 28               | 16               | 0              | -3.628011               | -1.284912 | 1.490307  |
| 29               | 6                | 0              | -4.403319               | -2.825125 | 0.830099  |
| 30               | 6                | 0              | -3.721581               | -3.217836 | -0.481403 |
| 31               | 16               | 0              | -3.532135               | -1.701647 | -1.486613 |
| 32               | 1                | 0              | -1.745548               | -1.096645 | -0.004788 |
| 33               | 1                | 0              | -4.284673               | -3.610532 | 1.582174  |
| 34               | 1                | 0              | -5.468724               | -2.643997 | 0.671856  |
| 35               | 1                | 0              | -4.330800               | -3.924557 | -1.052266 |
| 36               | 1                | 0              | -2.740512               | -3.666141 | -0.300543 |
| 37               | 6                | 0              | 1.309627                | -1.019934 | -1.008346 |
| 38               | 6                | 0              | 2.129975                | 1.136816  | -1.427954 |

|    |   |   |          |           |           |
|----|---|---|----------|-----------|-----------|
| 39 | 7 | 0 | 2.442791 | -0.178654 | -1.016692 |
| 40 | 8 | 0 | 1.310147 | -2.204250 | -0.748773 |
| 41 | 8 | 0 | 2.931267 | 2.029426  | -1.602028 |
| 42 | 6 | 0 | 3.751992 | -0.602388 | -0.626350 |
| 43 | 6 | 0 | 6.303428 | -1.430804 | 0.137461  |
| 44 | 6 | 0 | 4.859906 | -0.239262 | -1.398174 |
| 45 | 6 | 0 | 3.914558 | -1.377038 | 0.526632  |
| 46 | 6 | 0 | 5.191247 | -1.792848 | 0.899257  |
| 47 | 6 | 0 | 6.133217 | -0.651229 | -1.006988 |
| 48 | 1 | 0 | 4.724385 | 0.368966  | -2.283275 |
| 49 | 1 | 0 | 3.050104 | -1.651006 | 1.118164  |
| 50 | 1 | 0 | 5.315137 | -2.397851 | 1.792375  |
| 51 | 1 | 0 | 6.993019 | -0.363496 | -1.604441 |
| 52 | 1 | 0 | 7.296617 | -1.753934 | 0.434608  |

-----

**A (Conformer 2)**

**G16 optfreq B3LYP/6-31G(d,p) gas-phase**

Sum of electronic and thermal Free Energies= -2004.672525

-----

| Center<br>Number | Atomic<br>Number | Atomic<br>Type | Coordinates (Angstroms) |           |           |
|------------------|------------------|----------------|-------------------------|-----------|-----------|
|                  |                  |                | X                       | Y         | Z         |
| 1                | 6                | 0              | 1.651554                | 1.503822  | -0.500488 |
| 2                | 6                | 0              | 4.174275                | 2.751882  | -0.611021 |
| 3                | 6                | 0              | 2.826236                | 0.738896  | -0.332154 |
| 4                | 6                | 0              | 1.773354                | 2.886424  | -0.715697 |
| 5                | 6                | 0              | 3.014027                | 3.511520  | -0.769036 |
| 6                | 6                | 0              | 4.072537                | 1.382282  | -0.401907 |
| 7                | 1                | 0              | 0.871323                | 3.477121  | -0.843183 |
| 8                | 1                | 0              | 3.074325                | 4.582460  | -0.937849 |
| 9                | 1                | 0              | 4.969082                | 0.781502  | -0.289829 |
| 10               | 1                | 0              | 5.151510                | 3.222779  | -0.655287 |
| 11               | 6                | 0              | 0.244203                | 0.934625  | -0.407449 |
| 12               | 6                | 0              | -0.634976               | 1.195033  | -1.632647 |
| 13               | 6                | 0              | -0.115447               | -0.190828 | -1.374870 |
| 14               | 1                | 0              | -0.266381               | 1.834678  | -2.425218 |
| 15               | 1                | 0              | 0.653846                | -0.663457 | -1.974368 |
| 16               | 6                | 0              | -0.356061               | 1.008723  | 0.983883  |
| 17               | 6                | 0              | -1.374016               | 1.233241  | 3.594196  |
| 18               | 6                | 0              | -0.176186               | -0.026562 | 1.910733  |
| 19               | 6                | 0              | -1.053849               | 2.157253  | 1.382660  |
| 20               | 6                | 0              | -1.560206               | 2.268418  | 2.677188  |
| 21               | 6                | 0              | -0.683013               | 0.085003  | 3.206235  |
| 22               | 1                | 0              | 0.356119                | -0.927460 | 1.625107  |
| 23               | 1                | 0              | -1.218709               | 2.959918  | 0.670496  |
| 24               | 1                | 0              | -2.105213               | 3.162244  | 2.965655  |
| 25               | 1                | 0              | -0.534363               | -0.727599 | 3.911100  |
| 26               | 1                | 0              | -1.768757               | 1.318825  | 4.602201  |
| 27               | 6                | 0              | 2.795252                | -0.756379 | -0.096506 |

|    |    |   |           |           |           |
|----|----|---|-----------|-----------|-----------|
| 28 | 16 | 0 | 3.597293  | -1.700619 | -1.503916 |
| 29 | 6  | 0 | 4.376774  | -3.022490 | -0.477780 |
| 30 | 6  | 0 | 3.774817  | -2.998230 | 0.928756  |
| 31 | 16 | 0 | 3.634816  | -1.254738 | 1.466097  |
| 32 | 1  | 0 | 1.770977  | -1.112171 | -0.036259 |
| 33 | 1  | 0 | 4.193257  | -3.985623 | -0.962390 |
| 34 | 1  | 0 | 5.453311  | -2.842324 | -0.441415 |
| 35 | 1  | 0 | 4.416617  | -3.518658 | 1.645477  |
| 36 | 1  | 0 | 2.786906  | -3.467755 | 0.939959  |
| 37 | 6  | 0 | -2.123593 | 1.125809  | -1.442827 |
| 38 | 6  | 0 | -1.307109 | -1.028894 | -1.004520 |
| 39 | 7  | 0 | -2.440087 | -0.187608 | -1.028555 |
| 40 | 8  | 0 | -2.923318 | 2.017526  | -1.628601 |
| 41 | 8  | 0 | -1.310310 | -2.211012 | -0.736306 |
| 42 | 6  | 0 | -3.752697 | -0.608878 | -0.647079 |
| 43 | 6  | 0 | -6.310953 | -1.431731 | 0.099436  |
| 44 | 6  | 0 | -3.925808 | -1.374447 | 0.510399  |
| 45 | 6  | 0 | -4.853385 | -0.251959 | -1.431962 |
| 46 | 6  | 0 | -6.130239 | -0.661078 | -1.049441 |
| 47 | 6  | 0 | -5.205864 | -1.787587 | 0.874366  |
| 48 | 1  | 0 | -3.066805 | -1.643496 | 1.112078  |
| 49 | 1  | 0 | -4.709627 | 0.349265  | -2.320569 |
| 50 | 1  | 0 | -6.984479 | -0.378206 | -1.657104 |
| 51 | 1  | 0 | -5.338002 | -2.385621 | 1.770993  |
| 52 | 1  | 0 | -7.306815 | -1.752758 | 0.389827  |

-----

**B (Conformer 1)**

**G16 optfreq B3LYP/6-31G(d,p) gas-phase**

Sum of electronic and thermal Free Energies= -2004.669255

-----

| Center<br>Number | Atomic<br>Number | Atomic<br>Type | Coordinates (Angstroms) |           |           |
|------------------|------------------|----------------|-------------------------|-----------|-----------|
|                  |                  |                | X                       | Y         | Z         |
| 1                | 6                | 0              | -2.033234               | -1.948922 | -0.314231 |
| 2                | 6                | 0              | -4.638316               | -3.008403 | -0.386096 |
| 3                | 6                | 0              | -2.461874               | -2.865614 | 0.657885  |
| 4                | 6                | 0              | -2.932594               | -1.566874 | -1.315890 |
| 5                | 6                | 0              | -4.226403               | -2.092399 | -1.351596 |
| 6                | 6                | 0              | -3.750136               | -3.393215 | 0.621170  |
| 7                | 1                | 0              | -2.634305               | -0.846717 | -2.071054 |
| 8                | 1                | 0              | -4.909904               | -1.778270 | -2.134608 |
| 9                | 1                | 0              | -4.061087               | -4.105431 | 1.379792  |
| 10               | 1                | 0              | -5.643547               | -3.418029 | -0.414254 |
| 11               | 6                | 0              | -0.619501               | -1.395098 | -0.237074 |
| 12               | 6                | 0              | 0.455425                | -2.379203 | -0.711103 |
| 13               | 6                | 0              | 0.086541                | -1.206095 | -1.576290 |
| 14               | 1                | 0              | 0.168093                | -3.400771 | -0.928662 |
| 15               | 1                | 0              | -0.472779               | -1.294092 | -2.499315 |
| 16               | 6                | 0              | -0.370482               | -0.509911 | 0.971941  |

|    |    |   |           |           |           |
|----|----|---|-----------|-----------|-----------|
| 17 | 6  | 0 | -0.036643 | 0.934276  | 3.364227  |
| 18 | 6  | 0 | 0.204310  | -1.103615 | 2.107954  |
| 19 | 6  | 0 | -0.782822 | 0.840771  | 1.042805  |
| 20 | 6  | 0 | -0.606798 | 1.536522  | 2.248443  |
| 21 | 6  | 0 | 0.377080  | -0.395301 | 3.292983  |
| 22 | 1  | 0 | 0.535631  | -2.135252 | 2.053178  |
| 23 | 1  | 0 | -0.922584 | 2.572996  | 2.297065  |
| 24 | 1  | 0 | 0.832697  | -0.880025 | 4.150966  |
| 25 | 1  | 0 | 0.087159  | 1.501597  | 4.281738  |
| 26 | 6  | 0 | 1.874009  | -2.147025 | -0.274463 |
| 27 | 6  | 0 | 1.291853  | -0.309119 | -1.604706 |
| 28 | 7  | 0 | 2.277741  | -0.891417 | -0.777873 |
| 29 | 8  | 0 | 2.566789  | -2.905012 | 0.371144  |
| 30 | 8  | 0 | 1.416351  | 0.717549  | -2.235529 |
| 31 | 6  | 0 | 3.540111  | -0.279783 | -0.494943 |
| 32 | 6  | 0 | 5.996915  | 0.920535  | 0.059880  |
| 33 | 6  | 0 | 3.596590  | 1.088558  | -0.209456 |
| 34 | 6  | 0 | 4.707639  | -1.049798 | -0.505376 |
| 35 | 6  | 0 | 5.931006  | -0.444429 | -0.220521 |
| 36 | 6  | 0 | 4.827580  | 1.682630  | 0.061166  |
| 37 | 1  | 0 | 2.689745  | 1.680110  | -0.210219 |
| 38 | 1  | 0 | 4.653500  | -2.109362 | -0.718338 |
| 39 | 1  | 0 | 6.835273  | -1.045555 | -0.223467 |
| 40 | 1  | 0 | 4.868744  | 2.745800  | 0.277666  |
| 41 | 1  | 0 | 6.953057  | 1.387862  | 0.275627  |
| 42 | 1  | 0 | -1.779473 | -3.164995 | 1.447514  |
| 43 | 6  | 0 | -1.430881 | 1.547332  | -0.133797 |
| 44 | 1  | 0 | -1.317946 | 0.951275  | -1.035639 |
| 45 | 16 | 0 | -3.284226 | 1.794102  | 0.078059  |
| 46 | 16 | 0 | -0.651773 | 3.196238  | -0.452126 |
| 47 | 6  | 0 | -3.307721 | 3.618583  | -0.135314 |
| 48 | 1  | 0 | -4.282948 | 3.876726  | -0.560055 |
| 49 | 1  | 0 | -3.200524 | 4.115171  | 0.832225  |
| 50 | 6  | 0 | -2.169710 | 4.003697  | -1.072927 |
| 51 | 1  | 0 | -2.378511 | 3.689832  | -2.099276 |
| 52 | 1  | 0 | -1.985260 | 5.082712  | -1.063629 |

-----

**B (Conformer 2)**

**G16 optfreq B3LYP/6-31G(d,p) gas-phase**

Sum of electronic and thermal Free Energies= -2004.671956

-----

| Center<br>Number | Atomic<br>Number | Atomic<br>Type | Coordinates (Angstroms) |           |           |
|------------------|------------------|----------------|-------------------------|-----------|-----------|
|                  |                  |                | X                       | Y         | Z         |
| 1                | 6                | 0              | 2.072066                | -1.959067 | -0.275817 |
| 2                | 6                | 0              | 4.684136                | -3.004273 | -0.301373 |
| 3                | 6                | 0              | 2.962133                | -1.633930 | -1.305411 |
| 4                | 6                | 0              | 2.514287                | -2.810657 | 0.748161  |
| 5                | 6                | 0              | 3.806010                | -3.330983 | 0.734682  |

|    |    |   |           |           |           |
|----|----|---|-----------|-----------|-----------|
| 6  | 6  | 0 | 4.258800  | -2.152705 | -1.318730 |
| 7  | 1  | 0 | 1.839837  | -3.064575 | 1.560203  |
| 8  | 1  | 0 | 4.127324  | -3.992286 | 1.533991  |
| 9  | 1  | 0 | 4.934662  | -1.883699 | -2.124901 |
| 10 | 1  | 0 | 5.691944  | -3.408362 | -0.311734 |
| 11 | 6  | 0 | 0.654442  | -1.414635 | -0.222004 |
| 12 | 6  | 0 | -0.049867 | -1.249480 | -1.564465 |
| 13 | 6  | 0 | -0.412462 | -2.415072 | -0.687421 |
| 14 | 1  | 0 | 0.505880  | -1.342409 | -2.489098 |
| 15 | 1  | 0 | -0.113085 | -3.436006 | -0.890875 |
| 16 | 6  | 0 | 0.380387  | -0.497203 | 0.956617  |
| 17 | 6  | 0 | -0.065171 | 1.048734  | 3.264831  |
| 18 | 6  | 0 | -0.214961 | -1.053089 | 2.101860  |
| 19 | 6  | 0 | 0.765603  | 0.861865  | 0.978624  |
| 20 | 6  | 0 | 0.528116  | 1.610285  | 2.140915  |
| 21 | 6  | 0 | -0.439996 | -0.295096 | 3.246078  |
| 22 | 1  | 0 | -0.523535 | -2.093159 | 2.083989  |
| 23 | 1  | 0 | 0.819621  | 2.655208  | 2.152385  |
| 24 | 1  | 0 | -0.909819 | -0.750162 | 4.112566  |
| 25 | 1  | 0 | -0.236126 | 1.655897  | 4.148621  |
| 26 | 6  | 0 | -1.255855 | -0.351949 | -1.589288 |
| 27 | 6  | 0 | -1.835013 | -2.191720 | -0.260607 |
| 28 | 7  | 0 | -2.243004 | -0.939885 | -0.771769 |
| 29 | 8  | 0 | -1.376080 | 0.684781  | -2.205927 |
| 30 | 8  | 0 | -2.528554 | -2.949777 | 0.383487  |
| 31 | 6  | 0 | -3.505262 | -0.329652 | -0.484921 |
| 32 | 6  | 0 | -5.962577 | 0.863077  | 0.077337  |
| 33 | 6  | 0 | -4.674388 | -1.095493 | -0.527718 |
| 34 | 6  | 0 | -3.558790 | 1.030234  | -0.161936 |
| 35 | 6  | 0 | -4.790855 | 1.620837  | 0.111950  |
| 36 | 6  | 0 | -5.898824 | -0.494204 | -0.238960 |
| 37 | 1  | 0 | -4.620569 | -2.149138 | -0.769457 |
| 38 | 1  | 0 | -2.649295 | 1.617473  | -0.132810 |
| 39 | 1  | 0 | -4.831042 | 2.677707  | 0.357513  |
| 40 | 1  | 0 | -6.805089 | -1.091635 | -0.267083 |
| 41 | 1  | 0 | -6.919365 | 1.327885  | 0.295723  |
| 42 | 1  | 0 | 2.654112  | -0.963365 | -2.101404 |
| 43 | 6  | 0 | 1.443266  | 1.531203  | -0.203812 |
| 44 | 1  | 0 | 1.426286  | 0.872526  | -1.067811 |
| 45 | 16 | 0 | 0.613459  | 3.097465  | -0.795384 |
| 46 | 16 | 0 | 3.220861  | 1.916988  | 0.200006  |
| 47 | 6  | 0 | 1.959799  | 4.256637  | -0.342808 |
| 48 | 1  | 0 | 1.835683  | 5.142270  | -0.974027 |
| 49 | 1  | 0 | 1.885625  | 4.557708  | 0.705720  |
| 50 | 6  | 0 | 3.283971  | 3.555580  | -0.616909 |
| 51 | 1  | 0 | 3.453863  | 3.444743  | -1.690925 |
| 52 | 1  | 0 | 4.128094  | 4.095845  | -0.175884 |

-----

**18c**

**A**

### G16 optfreq B3LYP/6-31G(d,p) gas-phase

Sum of electronic and thermal Free Energies= -1303.366173

| Center<br>Number | Atomic<br>Number | Atomic<br>Type | Coordinates (Angstroms) |           |           |
|------------------|------------------|----------------|-------------------------|-----------|-----------|
|                  |                  |                | X                       | Y         | Z         |
| 1                | 1                | 0              | 0.771008                | 3.488874  | -0.727764 |
| 2                | 6                | 0              | 1.619969                | 2.846899  | -0.521371 |
| 3                | 6                | 0              | 3.807210                | 1.216898  | 0.009152  |
| 4                | 6                | 0              | 1.423573                | 1.462318  | -0.414917 |
| 5                | 6                | 0              | 2.884993                | 3.407423  | -0.361838 |
| 6                | 6                | 0              | 3.985358                | 2.592463  | -0.088808 |
| 7                | 6                | 0              | 2.539821                | 0.651777  | -0.162567 |
| 8                | 1                | 0              | 3.010081                | 4.482834  | -0.449040 |
| 9                | 1                | 0              | 4.972492                | 3.025610  | 0.040554  |
| 10               | 1                | 0              | 4.648688                | 0.563163  | 0.210606  |
| 11               | 6                | 0              | 2.412528                | -0.852570 | -0.076438 |
| 12               | 6                | 0              | 0.053501                | 0.828974  | -0.652628 |
| 13               | 1                | 0              | 0.016470                | 0.569799  | -1.717886 |
| 14               | 8                | 0              | 1.117267                | -1.334723 | -0.375236 |
| 15               | 6                | 0              | -0.034557               | -0.575986 | 0.067434  |
| 16               | 8                | 0              | 3.273176                | -1.486847 | -0.986591 |
| 17               | 8                | 0              | 2.826859                | -1.291303 | 1.204570  |
| 18               | 6                | 0              | 3.718330                | -2.718561 | -0.401846 |
| 19               | 1                | 0              | 3.324795                | -3.570754 | -0.964770 |
| 20               | 1                | 0              | 4.812327                | -2.736787 | -0.443293 |
| 21               | 6                | 0              | 3.175627                | -2.668184 | 1.041183  |
| 22               | 1                | 0              | 2.292494                | -3.304476 | 1.164034  |
| 23               | 1                | 0              | 3.917742                | -2.921119 | 1.801154  |
| 24               | 6                | 0              | -1.234911               | -1.355538 | -0.456874 |
| 25               | 6                | 0              | -3.473967               | -2.701630 | -1.500213 |
| 26               | 6                | 0              | -1.241805               | -1.804431 | -1.783339 |
| 27               | 6                | 0              | -2.353574               | -1.614883 | 0.352197  |
| 28               | 6                | 0              | -3.468922               | -2.279290 | -0.177228 |
| 29               | 6                | 0              | -2.349854               | -2.472198 | -2.300557 |
| 30               | 1                | 0              | -0.364005               | -1.649395 | -2.401361 |
| 31               | 1                | 0              | -4.311768               | -2.456298 | 0.482500  |
| 32               | 1                | 0              | -2.335035               | -2.818415 | -3.330089 |
| 33               | 1                | 0              | -4.338658               | -3.217350 | -1.907048 |
| 34               | 6                | 0              | -0.042928               | -0.430628 | 1.571603  |
| 35               | 1                | 0              | 0.866959                | -0.044706 | 2.018216  |
| 36               | 6                | 0              | -1.097779               | -0.718326 | 2.344081  |
| 37               | 1                | 0              | -1.075856               | -0.564667 | 3.419080  |
| 38               | 6                | 0              | -2.358979               | -1.255475 | 1.799062  |
| 39               | 8                | 0              | -3.339366               | -1.435401 | 2.514667  |
| 40               | 6                | 0              | -1.138122               | 1.734749  | -0.378994 |
| 41               | 6                | 0              | -3.392259               | 3.363954  | 0.076388  |
| 42               | 6                | 0              | -1.277574               | 2.451793  | 0.819399  |
| 43               | 6                | 0              | -2.146928               | 1.856569  | -1.343969 |
| 44               | 6                | 0              | -3.264860               | 2.661248  | -1.121238 |
| 45               | 6                | 0              | -2.392928               | 3.257549  | 1.045205  |

|    |   |   |           |          |           |
|----|---|---|-----------|----------|-----------|
| 46 | 1 | 0 | -0.503771 | 2.389251 | 1.577218  |
| 47 | 1 | 0 | -2.058384 | 1.308738 | -2.278045 |
| 48 | 1 | 0 | -4.033603 | 2.738005 | -1.884586 |
| 49 | 1 | 0 | -2.480527 | 3.802963 | 1.980346  |
| 50 | 1 | 0 | -4.260708 | 3.991449 | 0.253598  |

**B**

**G16 optfreq B3LYP/6-31G(d,p) gas-phase**

Sum of electronic and thermal Free Energies= -1303.365951

| Center<br>Number | Atomic<br>Number | Atomic<br>Type | Coordinates (Angstroms) |           |           |
|------------------|------------------|----------------|-------------------------|-----------|-----------|
|                  |                  |                | X                       | Y         | Z         |
| 1                | 6                | 0              | -1.554749               | 0.575017  | -1.225573 |
| 2                | 6                | 0              | -4.325483               | 0.584840  | -1.687113 |
| 3                | 6                | 0              | -2.419763               | -0.113671 | -0.368808 |
| 4                | 6                | 0              | -2.095523               | 1.269592  | -2.316163 |
| 5                | 6                | 0              | -3.467189               | 1.276409  | -2.547896 |
| 6                | 6                | 0              | -3.799945               | -0.108914 | -0.603197 |
| 7                | 1                | 0              | -1.428159               | 1.809031  | -2.982742 |
| 8                | 1                | 0              | -3.868755               | 1.817009  | -3.399953 |
| 9                | 1                | 0              | -4.450064               | -0.655106 | 0.071398  |
| 10               | 1                | 0              | -5.396615               | 0.586581  | -1.864380 |
| 11               | 6                | 0              | -0.055358               | 0.595027  | -0.969617 |
| 12               | 1                | 0              | 0.456010                | 0.545613  | -1.936294 |
| 13               | 6                | 0              | -1.888888               | -0.885303 | 0.819993  |
| 14               | 8                | 0              | -0.483941               | -0.818817 | 0.976915  |
| 15               | 6                | 0              | 0.345920                | -0.729249 | -0.198201 |
| 16               | 8                | 0              | -2.433186               | -0.394278 | 2.020523  |
| 17               | 8                | 0              | -2.311707               | -2.232173 | 0.737786  |
| 18               | 6                | 0              | -2.590194               | -1.495156 | 2.927357  |
| 19               | 1                | 0              | -1.920187               | -1.380261 | 3.785059  |
| 20               | 1                | 0              | -3.626683               | -1.497714 | 3.279978  |
| 21               | 6                | 0              | -2.245553               | -2.734115 | 2.075263  |
| 22               | 1                | 0              | -1.239791               | -3.108576 | 2.294021  |
| 23               | 1                | 0              | -2.967923               | -3.547647 | 2.166649  |
| 24               | 6                | 0              | 0.374990                | 1.897491  | -0.299602 |
| 25               | 6                | 0              | 1.203489                | 4.323303  | 0.862955  |
| 26               | 6                | 0              | 1.463185                | 2.609570  | -0.820384 |
| 27               | 6                | 0              | -0.299789               | 2.424028  | 0.812047  |
| 28               | 6                | 0              | 0.116209                | 3.623489  | 1.389713  |
| 29               | 6                | 0              | 1.876272                | 3.812315  | -0.246749 |
| 30               | 1                | 0              | 1.996553                | 2.215222  | -1.681591 |
| 31               | 1                | 0              | -1.148760               | 1.896271  | 1.233090  |
| 32               | 1                | 0              | -0.416889               | 4.015325  | 2.251353  |
| 33               | 1                | 0              | 2.721447                | 4.348324  | -0.668912 |
| 34               | 1                | 0              | 1.520005                | 5.260701  | 1.311091  |
| 35               | 6                | 0              | 1.785268                | -0.679991 | 0.297485  |
| 36               | 6                | 0              | 4.466376                | -0.455171 | 1.122936  |



|    |   |   |           |           |           |
|----|---|---|-----------|-----------|-----------|
| 37 | 6 | 0 | 2.109416  | -0.019025 | 1.487276  |
| 38 | 6 | 0 | 2.820205  | -1.259347 | -0.460461 |
| 39 | 6 | 0 | 4.154272  | -1.131493 | -0.049736 |
| 40 | 6 | 0 | 3.437145  | 0.087135  | 1.898025  |
| 41 | 1 | 0 | 1.317457  | 0.407772  | 2.088921  |
| 42 | 1 | 0 | 4.919756  | -1.592646 | -0.664936 |
| 43 | 1 | 0 | 3.668697  | 0.599466  | 2.827397  |
| 44 | 1 | 0 | 5.500031  | -0.361603 | 1.442462  |
| 45 | 6 | 0 | 0.119694  | -1.892821 | -1.147312 |
| 46 | 1 | 0 | -0.908396 | -2.200281 | -1.300885 |
| 47 | 6 | 0 | 1.105958  | -2.471180 | -1.844236 |
| 48 | 1 | 0 | 0.908502  | -3.244873 | -2.580382 |
| 49 | 6 | 0 | 2.523664  | -2.108129 | -1.650111 |
| 50 | 8 | 0 | 3.404584  | -2.539795 | -2.387560 |

-----

**18j**

A

**G16 optfreq B3LYP/6-31G(d,p) gas-phase**

Sum of electronic and thermal Free Energies= -1450.876562

-----

| Center<br>Number | Atomic<br>Number | Atomic<br>Type | Coordinates (Angstroms) |           |           |
|------------------|------------------|----------------|-------------------------|-----------|-----------|
|                  |                  |                | X                       | Y         | Z         |
| 1                | 1                | 0              | -0.323028               | 3.366759  | -1.134171 |
| 2                | 6                | 0              | 0.667158                | 2.953352  | -0.980879 |
| 3                | 6                | 0              | 3.214513                | 1.919594  | -0.591333 |
| 4                | 6                | 0              | 0.805736                | 1.590623  | -0.679408 |
| 5                | 6                | 0              | 1.779792                | 3.785183  | -1.080145 |
| 6                | 6                | 0              | 3.061794                | 3.271360  | -0.877938 |
| 7                | 6                | 0              | 2.098233                | 1.083233  | -0.503609 |
| 8                | 1                | 0              | 1.643043                | 4.837148  | -1.313462 |
| 9                | 1                | 0              | 3.931972                | 3.916746  | -0.948757 |
| 10               | 1                | 0              | 4.200384                | 1.494191  | -0.439116 |
| 11               | 6                | 0              | 2.327796                | -0.379855 | -0.224422 |
| 12               | 8                | 0              | 1.140850                | -1.162274 | -0.293427 |
| 13               | 6                | 0              | -0.130560               | -0.675375 | 0.130577  |
| 14               | 6                | 0              | -0.416662               | 0.666262  | -0.645838 |
| 15               | 8                | 0              | 3.186444                | -0.953476 | -1.179696 |
| 16               | 8                | 0              | 2.966034                | -0.549916 | 1.016522  |
| 17               | 6                | 0              | 3.587784                | -1.835402 | 0.954441  |
| 18               | 1                | 0              | 2.872697                | -2.614532 | 1.238465  |
| 19               | 1                | 0              | 4.429749                | -1.837160 | 1.649326  |
| 20               | 6                | 0              | 3.998441                | -1.939641 | -0.525337 |
| 21               | 1                | 0              | 5.050118                | -1.681678 | -0.690656 |
| 22               | 1                | 0              | 3.803220                | -2.930044 | -0.948131 |
| 23               | 6                | 0              | -1.133871               | -1.773561 | -0.287252 |
| 24               | 6                | 0              | -2.929738               | -3.759551 | -1.173656 |
| 25               | 6                | 0              | -0.706141               | -2.803702 | -1.137619 |

|    |   |   |           |           |           |
|----|---|---|-----------|-----------|-----------|
| 26 | 6 | 0 | -2.482412 | -1.749321 | 0.102813  |
| 27 | 6 | 0 | -3.366953 | -2.735520 | -0.335127 |
| 28 | 6 | 0 | -1.594888 | -3.786192 | -1.574118 |
| 29 | 1 | 0 | 0.327005  | -2.831686 | -1.456365 |
| 30 | 1 | 0 | -2.853956 | -0.968368 | 0.749825  |
| 31 | 1 | 0 | -4.404141 | -2.696325 | -0.015212 |
| 32 | 1 | 0 | -1.236891 | -4.574655 | -2.230018 |
| 33 | 1 | 0 | -3.621256 | -4.525858 | -1.511767 |
| 34 | 6 | 0 | -0.085703 | -0.542470 | 1.683601  |
| 35 | 9 | 0 | -1.305524 | -0.379988 | 2.244169  |
| 36 | 9 | 0 | 0.452137  | -1.647646 | 2.229693  |
| 37 | 9 | 0 | 0.651503  | 0.517803  | 2.081550  |
| 38 | 1 | 0 | -0.538248 | 0.299709  | -1.672952 |
| 39 | 6 | 0 | -1.714397 | 1.387095  | -0.294459 |
| 40 | 6 | 0 | -4.125730 | 2.733174  | 0.263592  |
| 41 | 6 | 0 | -2.800153 | 1.316814  | -1.177160 |
| 42 | 6 | 0 | -1.853333 | 2.157961  | 0.870542  |
| 43 | 6 | 0 | -3.047950 | 2.820173  | 1.147674  |
| 44 | 6 | 0 | -3.997173 | 1.980810  | -0.903041 |
| 45 | 1 | 0 | -2.708094 | 0.731994  | -2.088177 |
| 46 | 1 | 0 | -1.021710 | 2.244604  | 1.560395  |
| 47 | 1 | 0 | -3.135311 | 3.409219  | 2.056041  |
| 48 | 1 | 0 | -4.824379 | 1.910602  | -1.603356 |
| 49 | 1 | 0 | -5.054341 | 3.252871  | 0.480799  |

## B

### G16 optfreq B3LYP/6-31G(d,p) gas-phase

Sum of electronic and thermal Free Energies= -1450.881990

| Center<br>Number | Atomic<br>Number | Atomic<br>Type | Coordinates (Angstroms) |           |           |
|------------------|------------------|----------------|-------------------------|-----------|-----------|
|                  |                  |                | X                       | Y         | Z         |
| 1                | 1                | 0              | -4.246487               | 0.385193  | 0.724374  |
| 2                | 6                | 0              | -3.560238               | 0.953540  | 0.106221  |
| 3                | 6                | 0              | -3.999398               | 2.067618  | -0.599793 |
| 4                | 1                | 0              | -5.036811               | 2.380578  | -0.532469 |
| 5                | 6                | 0              | -3.098302               | 2.778012  | -1.398439 |
| 6                | 1                | 0              | -3.432299               | 3.646908  | -1.957888 |
| 7                | 6                | 0              | -1.770505               | 2.371154  | -1.479594 |
| 8                | 1                | 0              | -1.068946               | 2.927651  | -2.095033 |
| 9                | 6                | 0              | -1.317561               | 1.251043  | -0.770604 |
| 10               | 6                | 0              | 0.152530                | 0.853658  | -0.841271 |
| 11               | 6                | 0              | -2.224540               | 0.546168  | 0.023760  |
| 12               | 6                | 0              | 0.341444                | -0.655569 | -0.489889 |
| 13               | 8                | 0              | -0.407473               | -0.983561 | 0.675684  |
| 14               | 6                | 0              | -1.795633               | -0.677974 | 0.795104  |
| 15               | 8                | 0              | -2.011329               | -0.504114 | 2.175482  |
| 16               | 8                | 0              | -2.570470               | -1.790034 | 0.425296  |
| 17               | 6                | 0              | 1.801474                | -1.029345 | -0.181927 |

|    |   |   |           |           |           |
|----|---|---|-----------|-----------|-----------|
| 18 | 6 | 0 | 2.834110  | -0.686061 | -1.065780 |
| 19 | 1 | 0 | 2.616265  | -0.143637 | -1.977834 |
| 20 | 6 | 0 | 4.152964  | -1.042022 | -0.790740 |
| 21 | 1 | 0 | 4.938038  | -0.763831 | -1.487671 |
| 22 | 6 | 0 | 4.463884  | -1.748783 | 0.371253  |
| 23 | 1 | 0 | 5.492181  | -2.024746 | 0.585686  |
| 24 | 6 | 0 | 3.442504  | -2.095202 | 1.253843  |
| 25 | 1 | 0 | 3.670193  | -2.644834 | 2.162674  |
| 26 | 6 | 0 | 2.121030  | -1.740649 | 0.979246  |
| 27 | 1 | 0 | 1.333001  | -2.007187 | 1.670789  |
| 28 | 6 | 0 | -0.129088 | -1.558295 | -1.673513 |
| 29 | 6 | 0 | 0.987902  | 1.802230  | 0.020603  |
| 30 | 6 | 0 | 1.914127  | 2.655110  | -0.591005 |
| 31 | 1 | 0 | 2.054836  | 2.608704  | -1.668235 |
| 32 | 6 | 0 | 2.661684  | 3.563149  | 0.160630  |
| 33 | 1 | 0 | 3.374405  | 4.215820  | -0.335414 |
| 34 | 6 | 0 | 2.493139  | 3.627992  | 1.542807  |
| 35 | 1 | 0 | 3.072819  | 4.332090  | 2.132589  |
| 36 | 6 | 0 | 1.570271  | 2.782854  | 2.162676  |
| 37 | 1 | 0 | 1.429580  | 2.828488  | 3.238856  |
| 38 | 6 | 0 | 0.818499  | 1.881241  | 1.410823  |
| 39 | 1 | 0 | 0.099201  | 1.238797  | 1.907110  |
| 40 | 1 | 0 | 0.482359  | 0.982942  | -1.876979 |
| 41 | 6 | 0 | -2.363099 | -1.775718 | 2.740459  |
| 42 | 6 | 0 | -2.474407 | -2.707141 | 1.517189  |
| 43 | 1 | 0 | -1.594764 | -2.102330 | 3.448179  |
| 44 | 1 | 0 | -3.312963 | -1.659727 | 3.272633  |
| 45 | 1 | 0 | -1.588373 | -3.340931 | 1.402465  |
| 46 | 1 | 0 | -3.371708 | -3.328973 | 1.515048  |
| 47 | 9 | 0 | -0.042710 | -2.857696 | -1.341238 |
| 48 | 9 | 0 | -1.395090 | -1.318680 | -2.061503 |
| 49 | 9 | 0 | 0.645235  | -1.358220 | -2.769805 |

---

## References:

- 1 M. J. Frisch, G.W. Trucks, H.B. Schlegel, G. E. Scuseria, M.A. Robb, J.R. Cheeseman, G. Scalmani, V. Barone, G.A. Petersson, H. Nakatsuji, X. Li, M. Caricato, A.V. Marenich, J. Bloino, B.G. Janesko, R. Gomperts, B. Mennucci, H.P. Hratchian, J.V. Ortiz, A.F. Izmaylov, J.L. Sonnenberg, D. Williams-Young, F. Ding, F. Lipparini, F. Egidi, J. Goings, B. Peng, A. Petrone, T. Henderson, D. Ranasinghe, V.G. Zakrzewski, J. Gao, N. Rega, G. Zheng, W. Liang, M. Hada, M. Ehara, K. Toyota, R. Fukuda, J. Hasegawa, M. Ishida, T. Nakajima, Y. Honda, O. Kitao, H. Nakai, T. Vreven, K. Throssell, J.A. Montgomery, J.E. Peralta, F. Ogliaro, M.J. Bearpark, J.J. Heyd, E.N. Brothers, K. N.; Kudin, V. N. Staroverov, T.A. Keith, R. Kobayashi, J. Normand, K. Raghavachari, A.P. Rendell, J. C. Burant, S. S. Iyengar, J. Tomasi, M. Cossi, J. M. Millam, M. Klene, C. Adamo, R. Cammi, J. W. Ochterski, R. L. Martin, K. Morokuma, O. Farkas, J. B. Foresman, D. J. Fox, Gaussian, Inc., Wallingford CT, 2016.
- 2 (a) A. D. Becke, *J. Chem. Phys.* **1993**, *98*, 5648. (b) S. Grimme, J. Antony, S. Ehrlich, H. A. Krieg, *J. Chem. Phys.* **2010**, *132*, 154104.
- 3 A. V. Marenich, C. J. Cramer, D. G. Truhlar, *J. Phys. Chem. B* **2009**, *113*, 6378.

4 (a) K. Fukui, *Acc. Chem. Res.* **1981**, *14*, 363–368. (b) C. Gonzalez, H. B. Schlegel, *J. Phys. Chem. A.* 1990, *94*, 5523–5527. (c) S. Maeda, Y. Harabuchi, Y. Ono, T. Taketsugu, K. Morokuma, K. *Int. J. Quantum Chem.* **2015**, *115*, 258–269.

5 (a) T. Sperger, I. A. Sanhueza, I. Kalvet, F. Schoenebeck, *Chem. Rev.* **2015**, *115*, 9532-9586 (b) S. Ahn, M. Hong, M. Sundararajan, D. H. Ess, M. H. Baik, *Chem. Rev.* **2019**, *119*, 6509-6560 (c) C. J. Laconsay, D. J. Tantillo, *Synthesis* **2021**, *53*, 3639-3652.

6 M. Álvarez-Moreno, C. De Graaf, N. López, F. Maseras, J. M. Poblet, C. Bo, *J. Chem. Inf. Model.* **2015**, *55*, 95–103

7 *Spartan'18* Wavefunction, Inc. Irvine, CA

8 T. Bally, P. R. Rablen, *J. Org. Chem.* **2011**, *76* (12), 4818–4830.

9 M. W. Lodewyk, M. R. Siebert, D. J. Tantillo, *Chem. Rev.* **2011**, *112* (3), 1839–1862.

## X-ray Structure Data

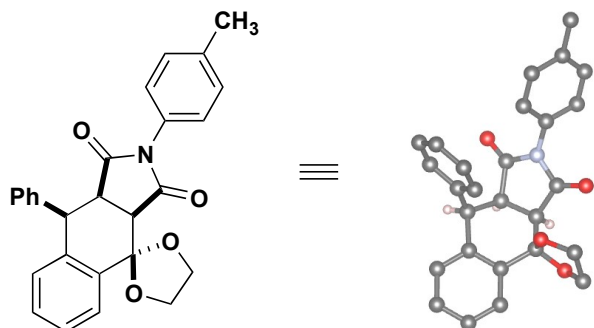

CCDC 2087127

Table 1. Crystal data and structure refinement for [C<sub>27</sub>H<sub>23</sub>NO<sub>4</sub>].

|                      |                                                  |          |
|----------------------|--------------------------------------------------|----------|
| Identification code  | JF2923FMI (MG-3-185-1-2)                         |          |
| Empirical formula    | C <sub>27</sub> H <sub>23</sub> N O <sub>4</sub> |          |
| Formula weight       | 425.46                                           |          |
| Temperature          | 90(2) K                                          |          |
| Wavelength           | 1.54178 Å                                        |          |
| Crystal system       | Orthorhombic                                     |          |
| Space group          | Pna2 <sub>1</sub>                                |          |
| Unit cell dimensions | a = 9.6342(6) Å                                  | ∠ = 90°. |
|                      | b = 21.7612(13) Å                                | ⊕ = 90°. |
|                      | c = 9.6649(6) Å                                  | ⊙ = 90°. |
| Volume               | 2026.3(2) Å <sup>3</sup>                         |          |
| Z                    | 4                                                |          |
| Density (calculated) | 1.395 Mg/m <sup>3</sup>                          |          |

|                                      |                                                                             |
|--------------------------------------|-----------------------------------------------------------------------------|
| Absorption coefficient               | 0.756 mm <sup>-1</sup>                                                      |
| F(000)                               | 896                                                                         |
| Crystal size                         | 0.547 x 0.446 x 0.106 mm <sup>3</sup>                                       |
| Crystal color and habit              | Colorless Plate                                                             |
| Diffractometer                       | Bruker APEX-II CCD                                                          |
| Theta range for data collection      | 4.063 to 69.555°.                                                           |
| Index ranges                         | -11<=h<=11, -26<=k<=26, -11<=l<=11                                          |
| Reflections collected                | 9041                                                                        |
| Independent reflections              | 3667 [R(int) = 0.0189]                                                      |
| Observed reflections (I > 2sigma(I)) | 3659                                                                        |
| Completeness to theta = 67.679°      | 99.6 %                                                                      |
| Absorption correction                | Semi-empirical from equivalents                                             |
| Max. and min. transmission           | 0.8184 and 0.6917                                                           |
| Solution method                      | SHELXT (Sheldrick, 2014)                                                    |
| Refinement method                    | SHELXL-2018/3 (Sheldrick, 2018) Full-matrix least-squares on F <sup>2</sup> |
| Data / restraints / parameters       | 3667 / 7 / 382                                                              |
| Goodness-of-fit on F <sup>2</sup>    | 1.072                                                                       |
| Final R indices [I>2sigma(I)]        | R1 = 0.0297, wR2 = 0.0776                                                   |
| R indices (all data)                 | R1 = 0.0297, wR2 = 0.0776                                                   |
| Absolute structure parameters        | Flack = 0.04(10), Parson's = 0.12(3), Hooft = 0.06(7)                       |
| Extinction coefficient               | 0.0036(5)                                                                   |
| Largest diff. peak and hole          | 0.213 and -0.156 e.Å <sup>-3</sup>                                          |

Table 2. Atomic coordinates ( x 10<sup>4</sup>) and equivalent isotropic displacement parameters (Å<sup>2</sup>x 10<sup>3</sup>) for JF2923FMI. U(eq) is defined as one third of the trace of the orthogonalized U<sup>ij</sup> tensor.

|      | x       | y       | z       | U(eq) |
|------|---------|---------|---------|-------|
| C(1) | 4508(2) | 5792(1) | 6564(2) | 16(1) |
| N(1) | 3178(2) | 5959(1) | 6143(2) | 16(1) |
| O(1) | 4974(2) | 5890(1) | 7702(2) | 22(1) |
| C(2) | 5194(2) | 5449(1) | 5371(2) | 15(1) |
| C(3) | 4140(2) | 5476(1) | 4182(2) | 15(1) |
| C(4) | 2829(2) | 5726(1) | 4837(2) | 16(1) |
| O(4) | 1684(2) | 5741(1) | 4338(2) | 21(1) |
| C(5) | 6702(2) | 5656(1) | 5092(2) | 15(1) |
| O(5) | 6956(2) | 6268(1) | 5554(2) | 17(1) |
| C(6) | 7057(2) | 5641(1) | 3553(2) | 15(1) |

|       |         |         |         |       |
|-------|---------|---------|---------|-------|
| O(6)  | 7578(2) | 5265(1) | 5884(2) | 18(1) |
| C(7)  | 6065(2) | 5792(1) | 2557(2) | 14(1) |
| C(8)  | 4537(2) | 5871(1) | 2898(2) | 15(1) |
| C(9)  | 8435(2) | 5546(1) | 3153(2) | 18(1) |
| C(10) | 8835(2) | 5613(1) | 1783(2) | 19(1) |
| C(11) | 7861(2) | 5782(1) | 794(2)  | 19(1) |
| C(12) | 6489(2) | 5869(1) | 1180(2) | 16(1) |
| C(13) | 2268(2) | 6344(1) | 6927(2) | 16(1) |
| C(14) | 1895(2) | 6911(1) | 6373(2) | 19(1) |
| C(15) | 1034(2) | 7301(1) | 7112(2) | 20(1) |
| C(16) | 531(2)  | 7134(1) | 8419(2) | 18(1) |
| C(17) | 926(2)  | 6566(1) | 8953(2) | 18(1) |
| C(18) | 1788(2) | 6170(1) | 8228(2) | 18(1) |
| C(19) | -423(3) | 7555(1) | 9198(2) | 26(1) |
| C(20) | 7889(2) | 6255(1) | 6718(3) | 25(1) |
| C(21) | 8588(2) | 5636(1) | 6588(2) | 24(1) |
| C(22) | 4082(2) | 6542(1) | 2943(2) | 15(1) |
| C(23) | 4771(2) | 6993(1) | 3706(2) | 18(1) |
| C(24) | 4309(2) | 7600(1) | 3668(2) | 20(1) |
| C(25) | 3167(2) | 7761(1) | 2886(2) | 21(1) |
| C(26) | 2469(2) | 7316(1) | 2132(2) | 22(1) |
| C(27) | 2927(2) | 6711(1) | 2162(2) | 19(1) |

---

Table 3. Bond lengths [Å] and angles [°] for JF2923FMI.

---

|            |          |
|------------|----------|
| C(1)-O(1)  | 1.208(3) |
| C(1)-N(1)  | 1.392(3) |
| C(1)-C(2)  | 1.524(3) |
| N(1)-C(4)  | 1.401(3) |
| N(1)-C(13) | 1.429(3) |
| C(2)-C(3)  | 1.534(3) |
| C(2)-C(5)  | 1.545(3) |
| C(2)-H(2)  | 1.01(3)  |
| C(3)-C(4)  | 1.515(3) |
| C(3)-C(8)  | 1.557(3) |

|              |          |
|--------------|----------|
| C(3)-H(3)    | 1.00(3)  |
| C(4)-O(4)    | 1.204(3) |
| C(5)-O(6)    | 1.421(2) |
| C(5)-O(5)    | 1.427(2) |
| C(5)-C(6)    | 1.527(3) |
| O(5)-C(20)   | 1.440(3) |
| C(6)-C(7)    | 1.395(3) |
| C(6)-C(9)    | 1.398(3) |
| O(6)-C(21)   | 1.436(3) |
| C(7)-C(12)   | 1.402(3) |
| C(7)-C(8)    | 1.518(3) |
| C(8)-C(22)   | 1.527(3) |
| C(8)-H(8)    | 0.98(3)  |
| C(9)-C(10)   | 1.387(3) |
| C(9)-H(9)    | 0.98(3)  |
| C(10)-C(11)  | 1.389(3) |
| C(10)-H(10)  | 0.97(3)  |
| C(11)-C(12)  | 1.386(3) |
| C(11)-H(11)  | 0.95(3)  |
| C(12)-H(12)  | 0.97(3)  |
| C(13)-C(18)  | 1.393(3) |
| C(13)-C(14)  | 1.393(3) |
| C(14)-C(15)  | 1.384(3) |
| C(14)-H(14)  | 0.95(3)  |
| C(15)-C(16)  | 1.400(3) |
| C(15)-H(15)  | 0.97(3)  |
| C(16)-C(17)  | 1.394(3) |
| C(16)-C(19)  | 1.500(3) |
| C(17)-C(18)  | 1.387(3) |
| C(17)-H(17)  | 0.95(3)  |
| C(18)-H(18)  | 0.95(3)  |
| C(19)-H(19A) | 0.96(2)  |
| C(19)-H(19B) | 0.95(2)  |
| C(19)-H(19C) | 0.95(2)  |
| C(20)-C(21)  | 1.511(3) |
| C(20)-H(20A) | 1.03(3)  |

|              |          |
|--------------|----------|
| C(20)-H(20B) | 1.00(3)  |
| C(21)-H(21A) | 1.00(3)  |
| C(21)-H(21B) | 0.95(3)  |
| C(22)-C(27)  | 1.394(3) |
| C(22)-C(23)  | 1.394(3) |
| C(23)-C(24)  | 1.394(3) |
| C(23)-H(23)  | 0.98(3)  |
| C(24)-C(25)  | 1.381(3) |
| C(24)-H(24)  | 0.98(3)  |
| C(25)-C(26)  | 1.386(3) |
| C(25)-H(25)  | 0.97(3)  |
| C(26)-C(27)  | 1.389(3) |
| C(26)-H(26)  | 0.94(3)  |
| C(27)-H(27)  | 1.01(3)  |

|                 |            |
|-----------------|------------|
| O(1)-C(1)-N(1)  | 124.2(2)   |
| O(1)-C(1)-C(2)  | 127.94(19) |
| N(1)-C(1)-C(2)  | 107.82(17) |
| C(1)-N(1)-C(4)  | 112.95(17) |
| C(1)-N(1)-C(13) | 124.22(17) |
| C(4)-N(1)-C(13) | 122.80(16) |
| C(1)-C(2)-C(3)  | 105.12(16) |
| C(1)-C(2)-C(5)  | 113.43(17) |
| C(3)-C(2)-C(5)  | 118.71(17) |
| C(1)-C(2)-H(2)  | 105.4(15)  |
| C(3)-C(2)-H(2)  | 108.2(14)  |
| C(5)-C(2)-H(2)  | 105.2(14)  |
| C(4)-C(3)-C(2)  | 104.65(16) |
| C(4)-C(3)-C(8)  | 109.86(16) |
| C(2)-C(3)-C(8)  | 117.09(16) |
| C(4)-C(3)-H(3)  | 107.7(15)  |
| C(2)-C(3)-H(3)  | 110.2(15)  |
| C(8)-C(3)-H(3)  | 107.1(15)  |
| O(4)-C(4)-N(1)  | 124.88(19) |
| O(4)-C(4)-C(3)  | 127.30(19) |
| N(1)-C(4)-C(3)  | 107.80(17) |



|                   |            |
|-------------------|------------|
| O(6)-C(5)-O(5)    | 106.76(15) |
| O(6)-C(5)-C(6)    | 112.31(16) |
| O(5)-C(5)-C(6)    | 106.64(16) |
| O(6)-C(5)-C(2)    | 106.87(16) |
| O(5)-C(5)-C(2)    | 112.20(16) |
| C(6)-C(5)-C(2)    | 112.02(17) |
| C(5)-O(5)-C(20)   | 109.42(15) |
| C(7)-C(6)-C(9)    | 119.68(19) |
| C(7)-C(6)-C(5)    | 120.90(18) |
| C(9)-C(6)-C(5)    | 118.99(18) |
| C(5)-O(6)-C(21)   | 108.76(15) |
| C(6)-C(7)-C(12)   | 118.91(19) |
| C(6)-C(7)-C(8)    | 122.74(18) |
| C(12)-C(7)-C(8)   | 118.35(18) |
| C(7)-C(8)-C(22)   | 113.11(16) |
| C(7)-C(8)-C(3)    | 110.45(16) |
| C(22)-C(8)-C(3)   | 115.79(16) |
| C(7)-C(8)-H(8)    | 105.0(15)  |
| C(22)-C(8)-H(8)   | 105.2(14)  |
| C(3)-C(8)-H(8)    | 106.4(14)  |
| C(10)-C(9)-C(6)   | 120.7(2)   |
| C(10)-C(9)-H(9)   | 119.6(16)  |
| C(6)-C(9)-H(9)    | 119.6(15)  |
| C(9)-C(10)-C(11)  | 119.82(19) |
| C(9)-C(10)-H(10)  | 117.8(16)  |
| C(11)-C(10)-H(10) | 122.4(16)  |
| C(12)-C(11)-C(10) | 119.7(2)   |
| C(12)-C(11)-H(11) | 121.0(17)  |
| C(10)-C(11)-H(11) | 119.3(17)  |
| C(11)-C(12)-C(7)  | 121.1(2)   |
| C(11)-C(12)-H(12) | 121.3(16)  |
| C(7)-C(12)-H(12)  | 117.6(16)  |
| C(18)-C(13)-C(14) | 120.16(19) |
| C(18)-C(13)-N(1)  | 121.50(18) |
| C(14)-C(13)-N(1)  | 118.31(18) |
| C(15)-C(14)-C(13) | 119.9(2)   |

|                     |            |
|---------------------|------------|
| C(15)-C(14)-H(14)   | 119.7(16)  |
| C(13)-C(14)-H(14)   | 120.4(16)  |
| C(14)-C(15)-C(16)   | 121.0(2)   |
| C(14)-C(15)-H(15)   | 122.2(16)  |
| C(16)-C(15)-H(15)   | 116.8(16)  |
| C(17)-C(16)-C(15)   | 117.99(19) |
| C(17)-C(16)-C(19)   | 121.51(19) |
| C(15)-C(16)-C(19)   | 120.5(2)   |
| C(18)-C(17)-C(16)   | 121.8(2)   |
| C(18)-C(17)-H(17)   | 119.7(16)  |
| C(16)-C(17)-H(17)   | 118.4(16)  |
| C(17)-C(18)-C(13)   | 119.1(2)   |
| C(17)-C(18)-H(18)   | 117.4(17)  |
| C(13)-C(18)-H(18)   | 123.4(17)  |
| C(16)-C(19)-H(19A)  | 110(2)     |
| C(16)-C(19)-H(19B)  | 115(3)     |
| H(19A)-C(19)-H(19B) | 106.0(19)  |
| C(16)-C(19)-H(19C)  | 112(2)     |
| H(19A)-C(19)-H(19C) | 106.5(19)  |
| H(19B)-C(19)-H(19C) | 107(2)     |
| O(5)-C(20)-C(21)    | 103.39(17) |
| O(5)-C(20)-H(20A)   | 108.9(16)  |
| C(21)-C(20)-H(20A)  | 112.8(15)  |
| O(5)-C(20)-H(20B)   | 106.9(16)  |
| C(21)-C(20)-H(20B)  | 115.9(15)  |
| H(20A)-C(20)-H(20B) | 108(2)     |
| O(6)-C(21)-C(20)    | 103.79(17) |
| O(6)-C(21)-H(21A)   | 109.8(18)  |
| C(20)-C(21)-H(21A)  | 111.6(18)  |
| O(6)-C(21)-H(21B)   | 107.0(18)  |
| C(20)-C(21)-H(21B)  | 113.4(18)  |
| H(21A)-C(21)-H(21B) | 111(3)     |
| C(27)-C(22)-C(23)   | 118.78(18) |
| C(27)-C(22)-C(8)    | 117.76(17) |
| C(23)-C(22)-C(8)    | 123.45(18) |
| C(24)-C(23)-C(22)   | 120.0(2)   |

|                   |            |
|-------------------|------------|
| C(24)-C(23)-H(23) | 119.5(16)  |
| C(22)-C(23)-H(23) | 120.5(16)  |
| C(25)-C(24)-C(23) | 120.6(2)   |
| C(25)-C(24)-H(24) | 121.7(18)  |
| C(23)-C(24)-H(24) | 117.6(18)  |
| C(24)-C(25)-C(26) | 119.74(19) |
| C(24)-C(25)-H(25) | 120.3(16)  |
| C(26)-C(25)-H(25) | 120.0(16)  |
| C(25)-C(26)-C(27) | 119.9(2)   |
| C(25)-C(26)-H(26) | 121.3(16)  |
| C(27)-C(26)-H(26) | 118.7(16)  |
| C(26)-C(27)-C(22) | 120.9(2)   |
| C(26)-C(27)-H(27) | 117.9(14)  |
| C(22)-C(27)-H(27) | 121.2(14)  |

---

Symmetry transformations used to generate equivalent atoms:

Table 4. Anisotropic displacement parameters ( $\text{\AA}^2 \times 10^3$ ) for JF2923FMI. The anisotropic displacement factor exponent takes the form:  $-2\pi^2 [ h^2 a^* U^{11} + \dots + 2 h k a^* b^* U^{12} ]$

|       | $U^{11}$ | $U^{22}$ | $U^{33}$ | $U^{23}$ | $U^{13}$ | $U^{12}$ |
|-------|----------|----------|----------|----------|----------|----------|
| C(1)  | 16(1)    | 16(1)    | 17(1)    | 4(1)     | 2(1)     | -2(1)    |
| N(1)  | 15(1)    | 19(1)    | 16(1)    | 0(1)     | 0(1)     | 1(1)     |
| O(1)  | 20(1)    | 30(1)    | 15(1)    | 1(1)     | -1(1)    | 2(1)     |
| C(2)  | 16(1)    | 13(1)    | 16(1)    | 2(1)     | 1(1)     | 1(1)     |
| C(3)  | 15(1)    | 13(1)    | 17(1)    | 0(1)     | 0(1)     | -2(1)    |
| C(4)  | 17(1)    | 15(1)    | 16(1)    | 3(1)     | 1(1)     | -2(1)    |
| O(4)  | 14(1)    | 29(1)    | 20(1)    | 0(1)     | -1(1)    | -2(1)    |
| C(5)  | 15(1)    | 12(1)    | 18(1)    | 2(1)     | -1(1)    | 1(1)     |
| O(5)  | 19(1)    | 15(1)    | 17(1)    | -1(1)    | -4(1)    | -2(1)    |
| C(6)  | 16(1)    | 10(1)    | 18(1)    | -1(1)    | 1(1)     | -1(1)    |
| O(6)  | 16(1)    | 18(1)    | 20(1)    | 4(1)     | -4(1)    | 3(1)     |
| C(7)  | 15(1)    | 9(1)     | 18(1)    | -2(1)    | 1(1)     | -2(1)    |
| C(8)  | 16(1)    | 14(1)    | 14(1)    | -1(1)    | -2(1)    | -1(1)    |
| C(9)  | 16(1)    | 14(1)    | 22(1)    | 1(1)     | -1(1)    | 0(1)     |
| C(10) | 16(1)    | 18(1)    | 24(1)    | -2(1)    | 4(1)     | -1(1)    |

|       |       |       |       |       |       |       |
|-------|-------|-------|-------|-------|-------|-------|
| C(11) | 23(1) | 17(1) | 18(1) | -1(1) | 3(1)  | -3(1) |
| C(12) | 18(1) | 13(1) | 18(1) | -1(1) | -1(1) | -2(1) |
| C(13) | 13(1) | 19(1) | 17(1) | -1(1) | 0(1)  | -1(1) |
| C(14) | 18(1) | 21(1) | 18(1) | 2(1)  | 1(1)  | 0(1)  |
| C(15) | 20(1) | 19(1) | 20(1) | 1(1)  | -2(1) | 0(1)  |
| C(16) | 14(1) | 23(1) | 19(1) | -4(1) | -2(1) | -1(1) |
| C(17) | 17(1) | 24(1) | 15(1) | 0(1)  | 1(1)  | -3(1) |
| C(18) | 16(1) | 19(1) | 18(1) | 2(1)  | -1(1) | -1(1) |
| C(19) | 24(1) | 31(1) | 22(1) | -3(1) | 0(1)  | 7(1)  |
| C(20) | 25(1) | 28(1) | 22(1) | -2(1) | -8(1) | -3(1) |
| C(21) | 21(1) | 31(1) | 20(1) | -1(1) | -5(1) | 2(1)  |
| C(22) | 16(1) | 16(1) | 13(1) | 1(1)  | 3(1)  | 0(1)  |
| C(23) | 17(1) | 17(1) | 19(1) | -1(1) | 0(1)  | 2(1)  |
| C(24) | 24(1) | 16(1) | 20(1) | -1(1) | 2(1)  | -1(1) |
| C(25) | 25(1) | 17(1) | 22(1) | 3(1)  | 5(1)  | 5(1)  |
| C(26) | 20(1) | 26(1) | 20(1) | 3(1)  | -2(1) | 7(1)  |
| C(27) | 18(1) | 20(1) | 18(1) | -1(1) | -1(1) | 1(1)  |

Table 5. Hydrogen coordinates ( $\times 10^4$ ) and isotropic displacement parameters ( $\text{\AA}^2 \times 10^{-3}$ ) for JF2923FMI.

|       | x        | y        | z        | U(eq) |
|-------|----------|----------|----------|-------|
| H(2)  | 5270(20) | 5009(12) | 5690(30) | 18(6) |
| H(3)  | 3930(30) | 5052(12) | 3840(30) | 20(6) |
| H(8)  | 4040(30) | 5692(11) | 2110(30) | 13(6) |
| H(9)  | 9120(30) | 5415(12) | 3850(30) | 18(6) |
| H(10) | 9810(30) | 5543(11) | 1560(30) | 15(6) |
| H(11) | 8150(30) | 5835(12) | -140(30) | 21(6) |
| H(12) | 5790(30) | 5990(12) | 510(30)  | 20(6) |
| H(14) | 2220(30) | 7031(12) | 5490(30) | 19(6) |
| H(15) | 760(20)  | 7701(12) | 6760(30) | 18(6) |
| H(17) | 580(30)  | 6447(12) | 9830(30) | 22(6) |
| H(18) | 1990(30) | 5782(13) | 8640(30) | 21(7) |

|        |           |          |           |        |
|--------|-----------|----------|-----------|--------|
| H(19A) | -1350(30) | 7513(16) | 8850(30)  | 60(11) |
| H(19B) | -200(40)  | 7980(12) | 9130(40)  | 90(16) |
| H(19C) | -460(30)  | 7458(16) | 10160(30) | 60(11) |
| H(20A) | 7320(30)  | 6298(12) | 7620(30)  | 21(7)  |
| H(20B) | 8510(30)  | 6620(13) | 6630(30)  | 22(6)  |
| H(21A) | 9460(30)  | 5662(14) | 6020(30)  | 32(8)  |
| H(21B) | 8760(30)  | 5446(14) | 7450(30)  | 28(7)  |
| H(23)  | 5570(30)  | 6886(12) | 4270(30)  | 23(6)  |
| H(24)  | 4800(30)  | 7901(14) | 4250(30)  | 34(8)  |
| H(25)  | 2860(30)  | 8187(13) | 2850(30)  | 22(6)  |
| H(26)  | 1710(30)  | 7416(12) | 1570(30)  | 20(6)  |
| H(27)  | 2390(30)  | 6396(12) | 1600(30)  | 16(6)  |

Table 6. Torsion angles [°] for JF2923FMI.

|                      |             |
|----------------------|-------------|
| O(1)-C(1)-N(1)-C(4)  | -172.52(18) |
| C(2)-C(1)-N(1)-C(4)  | 4.9(2)      |
| O(1)-C(1)-N(1)-C(13) | 9.4(3)      |
| C(2)-C(1)-N(1)-C(13) | -173.11(17) |
| O(1)-C(1)-C(2)-C(3)  | -179.00(19) |
| N(1)-C(1)-C(2)-C(3)  | 3.7(2)      |
| O(1)-C(1)-C(2)-C(5)  | -47.8(3)    |
| N(1)-C(1)-C(2)-C(5)  | 134.91(17)  |
| C(1)-C(2)-C(3)-C(4)  | -9.98(19)   |
| C(5)-C(2)-C(3)-C(4)  | -138.11(17) |
| C(1)-C(2)-C(3)-C(8)  | 111.90(18)  |
| C(5)-C(2)-C(3)-C(8)  | -16.2(3)    |
| C(1)-N(1)-C(4)-O(4)  | 169.80(19)  |
| C(13)-N(1)-C(4)-O(4) | -12.1(3)    |
| C(1)-N(1)-C(4)-C(3)  | -11.6(2)    |
| C(13)-N(1)-C(4)-C(3) | 166.45(17)  |
| C(2)-C(3)-C(4)-O(4)  | -168.4(2)   |
| C(8)-C(3)-C(4)-O(4)  | 65.1(3)     |
| C(2)-C(3)-C(4)-N(1)  | 13.10(19)   |
| C(8)-C(3)-C(4)-N(1)  | -113.39(17) |

|                        |             |
|------------------------|-------------|
| C(1)-C(2)-C(5)-O(6)    | 91.78(19)   |
| C(3)-C(2)-C(5)-O(6)    | -144.07(17) |
| C(1)-C(2)-C(5)-O(5)    | -24.9(2)    |
| C(3)-C(2)-C(5)-O(5)    | 99.2(2)     |
| C(1)-C(2)-C(5)-C(6)    | -144.82(17) |
| C(3)-C(2)-C(5)-C(6)    | -20.7(2)    |
| O(6)-C(5)-O(5)-C(20)   | -5.3(2)     |
| C(6)-C(5)-O(5)-C(20)   | -125.55(17) |
| C(2)-C(5)-O(5)-C(20)   | 111.46(19)  |
| O(6)-C(5)-C(6)-C(7)    | 155.77(17)  |
| O(5)-C(5)-C(6)-C(7)    | -87.6(2)    |
| C(2)-C(5)-C(6)-C(7)    | 35.5(2)     |
| O(6)-C(5)-C(6)-C(9)    | -31.8(2)    |
| O(5)-C(5)-C(6)-C(9)    | 84.8(2)     |
| C(2)-C(5)-C(6)-C(9)    | -152.07(17) |
| O(5)-C(5)-O(6)-C(21)   | -13.3(2)    |
| C(6)-C(5)-O(6)-C(21)   | 103.19(19)  |
| C(2)-C(5)-O(6)-C(21)   | -133.59(18) |
| C(9)-C(6)-C(7)-C(12)   | -2.5(3)     |
| C(5)-C(6)-C(7)-C(12)   | 169.87(17)  |
| C(9)-C(6)-C(7)-C(8)    | 176.78(17)  |
| C(5)-C(6)-C(7)-C(8)    | -10.8(3)    |
| C(6)-C(7)-C(8)-C(22)   | 104.3(2)    |
| C(12)-C(7)-C(8)-C(22)  | -76.4(2)    |
| C(6)-C(7)-C(8)-C(3)    | -27.3(2)    |
| C(12)-C(7)-C(8)-C(3)   | 151.96(17)  |
| C(4)-C(3)-C(8)-C(7)    | 158.79(16)  |
| C(2)-C(3)-C(8)-C(7)    | 39.7(2)     |
| C(4)-C(3)-C(8)-C(22)   | 28.6(2)     |
| C(2)-C(3)-C(8)-C(22)   | -90.5(2)    |
| C(7)-C(6)-C(9)-C(10)   | 1.5(3)      |
| C(5)-C(6)-C(9)-C(10)   | -171.04(18) |
| C(6)-C(9)-C(10)-C(11)  | 0.5(3)      |
| C(9)-C(10)-C(11)-C(12) | -1.4(3)     |
| C(10)-C(11)-C(12)-C(7) | 0.4(3)      |
| C(6)-C(7)-C(12)-C(11)  | 1.6(3)      |

|                         |             |
|-------------------------|-------------|
| C(8)-C(7)-C(12)-C(11)   | -177.72(18) |
| C(1)-N(1)-C(13)-C(18)   | -62.7(3)    |
| C(4)-N(1)-C(13)-C(18)   | 119.4(2)    |
| C(1)-N(1)-C(13)-C(14)   | 115.6(2)    |
| C(4)-N(1)-C(13)-C(14)   | -62.3(3)    |
| C(18)-C(13)-C(14)-C(15) | -0.6(3)     |
| N(1)-C(13)-C(14)-C(15)  | -178.97(18) |
| C(13)-C(14)-C(15)-C(16) | 0.2(3)      |
| C(14)-C(15)-C(16)-C(17) | 0.1(3)      |
| C(14)-C(15)-C(16)-C(19) | -178.8(2)   |
| C(15)-C(16)-C(17)-C(18) | -0.1(3)     |
| C(19)-C(16)-C(17)-C(18) | 178.8(2)    |
| C(16)-C(17)-C(18)-C(13) | -0.2(3)     |
| C(14)-C(13)-C(18)-C(17) | 0.6(3)      |
| N(1)-C(13)-C(18)-C(17)  | 178.90(18)  |
| C(5)-O(5)-C(20)-C(21)   | 20.5(2)     |
| C(5)-O(6)-C(21)-C(20)   | 25.6(2)     |
| O(5)-C(20)-C(21)-O(6)   | -27.6(2)    |
| C(7)-C(8)-C(22)-C(27)   | 128.21(19)  |
| C(3)-C(8)-C(22)-C(27)   | -102.9(2)   |
| C(7)-C(8)-C(22)-C(23)   | -51.0(3)    |
| C(3)-C(8)-C(22)-C(23)   | 78.0(2)     |
| C(27)-C(22)-C(23)-C(24) | -0.6(3)     |
| C(8)-C(22)-C(23)-C(24)  | 178.53(19)  |
| C(22)-C(23)-C(24)-C(25) | 0.4(3)      |
| C(23)-C(24)-C(25)-C(26) | 0.1(3)      |
| C(24)-C(25)-C(26)-C(27) | -0.4(3)     |
| C(25)-C(26)-C(27)-C(22) | 0.1(3)      |
| C(23)-C(22)-C(27)-C(26) | 0.4(3)      |
| C(8)-C(22)-C(27)-C(26)  | -178.80(19) |

---

Symmetry transformations used to generate equivalent atoms:

Table 7. Hydrogen bonds for JF2923FMI [ $\text{\AA}$  and  $^\circ$ ].

---

| D-H...A | d(D-H) | d(H...A) | d(D...A) | $\angle$ (DHA) |
|---------|--------|----------|----------|----------------|
|---------|--------|----------|----------|----------------|

|                     |         |         |          |        |
|---------------------|---------|---------|----------|--------|
| C(3)-H(3)...O(1)#1  | 1.00(3) | 2.55(3) | 3.408(2) | 143(2) |
| C(20)-H(20A)...O(1) | 1.03(3) | 2.43(3) | 3.070(3) | 119(2) |

Symmetry transformations used to generate equivalent atoms:

#1 -x+1,-y+1,z-1/2

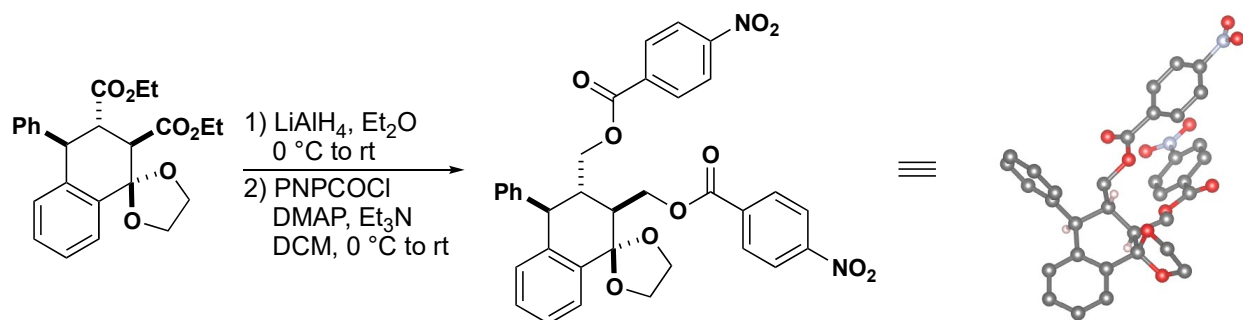

CCDC 2087132

Table 1. Crystal data and structure refinement for [C<sub>34</sub>H<sub>28</sub>N<sub>2</sub>O<sub>10</sub>].

|                                 |                                                                |                   |
|---------------------------------|----------------------------------------------------------------|-------------------|
| Identification code             | JF2954FMI_MO_190K                                              | (MG-4-130)        |
| Empirical formula               | C <sub>34</sub> H <sub>28</sub> N <sub>2</sub> O <sub>10</sub> |                   |
| Formula weight                  | 624.58                                                         |                   |
| Temperature                     | 190(2) K                                                       |                   |
| Wavelength                      | 0.71073 Å                                                      |                   |
| Crystal system                  | Triclinic                                                      |                   |
| Space group                     | P-1                                                            |                   |
| Unit cell dimensions            | a = 11.3403(4) Å                                               | ∠ = 75.4010(15)°. |
|                                 | b = 11.8742(4) Å                                               | ⊕ = 71.3610(15)°. |
|                                 | c = 12.8266(5) Å                                               | ⊙ = 62.6841(13)°. |
| Volume                          | 1442.67(9) Å <sup>3</sup>                                      |                   |
| Z                               | 2                                                              |                   |
| Density (calculated)            | 1.438 Mg/m <sup>3</sup>                                        |                   |
| Absorption coefficient          | 0.107 mm <sup>-1</sup>                                         |                   |
| F(000)                          | 652                                                            |                   |
| Crystal size                    | 0.285 x 0.246 x 0.162 mm <sup>3</sup>                          |                   |
| Crystal color and habit         | Colorless Block                                                |                   |
| Diffractometer                  | Bruker Photon100 CMOS                                          |                   |
| Theta range for data collection | 2.081 to 27.500°.                                              |                   |
| Index ranges                    | -14 ≤ h ≤ 14, -15 ≤ k ≤ 15, -16 ≤ l ≤ 16                       |                   |



|                                      |                                                                             |
|--------------------------------------|-----------------------------------------------------------------------------|
| Reflections collected                | 11871                                                                       |
| Independent reflections              | 6538 [R(int) = 0.0135]                                                      |
| Observed reflections (I > 2sigma(I)) | 5790                                                                        |
| Completeness to theta = 25.242°      | 98.3 %                                                                      |
| Absorption correction                | Semi-empirical from equivalents                                             |
| Max. and min. transmission           | 1.0102 and 0.9609                                                           |
| Solution method                      | SHELXT (Sheldrick, 2014)                                                    |
| Refinement method                    | SHELXL-2017/1 (Sheldrick, 2017) Full-matrix least-squares on F <sup>2</sup> |
| Data / restraints / parameters       | 6538 / 0 / 528                                                              |
| Goodness-of-fit on F <sup>2</sup>    | 1.069                                                                       |
| Final R indices [I>2sigma(I)]        | R1 = 0.0370, wR2 = 0.0974                                                   |
| R indices (all data)                 | R1 = 0.0426, wR2 = 0.1012                                                   |
| Extinction coefficient               | 0.0112(17)                                                                  |
| Largest diff. peak and hole          | 0.370 and -0.313 e.Å <sup>-3</sup>                                          |

Table 2. Atomic coordinates ( $\times 10^4$ ) and equivalent isotropic displacement parameters ( $\text{\AA}^2 \times 10^3$ ) for JF2954FMI\_MO\_190K.  $U(\text{eq})$  is defined as one third of the trace of the orthogonalized  $U^{ij}$  tensor.

|       | x       | y       | z        | $U(\text{eq})$ |
|-------|---------|---------|----------|----------------|
| C(1)  | 2987(1) | 4220(1) | 922(1)   | 14(1)          |
| C(2)  | 1953(1) | 5466(1) | 1429(1)  | 14(1)          |
| C(3)  | 1852(1) | 6586(1) | 500(1)   | 14(1)          |
| O(3)  | 3176(1) | 6604(1) | 99(1)    | 16(1)          |
| C(4)  | 1362(1) | 6449(1) | -419(1)  | 15(1)          |
| O(4)  | 947(1)  | 7774(1) | 921(1)   | 17(1)          |
| C(5)  | 594(1)  | 7539(1) | -1050(1) | 20(1)          |
| C(6)  | 169(1)  | 7422(1) | -1902(1) | 22(1)          |
| C(7)  | 485(1)  | 6212(1) | -2124(1) | 21(1)          |
| C(8)  | 1221(1) | 5131(1) | -1489(1) | 18(1)          |
| C(9)  | 1677(1) | 5233(1) | -634(1)  | 15(1)          |
| C(10) | 2461(1) | 4004(1) | 39(1)    | 14(1)          |
| C(11) | 3291(1) | 3022(1) | 1764(1)  | 15(1)          |
| O(11) | 4270(1) | 2948(1) | 2318(1)  | 16(1)          |
| C(12) | 4647(1) | 1918(1) | 3076(1)  | 16(1)          |
| O(12) | 4218(1) | 1104(1) | 3297(1)  | 25(1)          |
| C(13) | 5653(1) | 1903(1) | 3610(1)  | 16(1)          |
| C(14) | 6049(1) | 2910(1) | 3386(1)  | 21(1)          |
| C(15) | 7001(1) | 2846(1) | 3889(1)  | 23(1)          |
| C(16) | 7538(1) | 1761(1) | 4608(1)  | 21(1)          |
| N(16) | 8606(1) | 1656(1) | 5096(1)  | 26(1)          |
| O(16) | 8843(1) | 881(1)  | 5924(1)  | 36(1)          |
| C(17) | 7147(1) | 760(1)  | 4866(1)  | 21(1)          |
| O(17) | 9225(1) | 2333(1) | 4636(1)  | 38(1)          |
| C(18) | 6196(1) | 837(1)  | 4356(1)  | 19(1)          |
| C(19) | 2317(1) | 5697(1) | 2378(1)  | 16(1)          |
| O(19) | 1924(1) | 4903(1) | 3366(1)  | 16(1)          |
| C(20) | 2428(1) | 4792(1) | 4221(1)  | 17(1)          |
| O(20) | 3057(1) | 5377(1) | 4231(1)  | 28(1)          |
| C(21) | 2157(1) | 3818(1) | 5147(1)  | 16(1)          |
| C(22) | 1283(1) | 3278(1) | 5174(1)  | 18(1)          |

|       |         |         |          |       |
|-------|---------|---------|----------|-------|
| C(23) | 1113(1) | 2337(1) | 6026(1)  | 18(1) |
| C(24) | 1838(1) | 1958(1) | 6834(1)  | 18(1) |
| N(24) | 1715(1) | 917(1)  | 7717(1)  | 20(1) |
| O(24) | 1106(1) | 333(1)  | 7626(1)  | 25(1) |
| C(25) | 2710(1) | 2478(1) | 6834(1)  | 21(1) |
| O(25) | 2246(1) | 685(1)  | 8487(1)  | 33(1) |
| C(26) | 2867(1) | 3422(1) | 5978(1)  | 21(1) |
| C(27) | 2937(1) | 7926(1) | -228(1)  | 19(1) |
| C(28) | 1661(1) | 8592(1) | 634(1)   | 20(1) |
| C(29) | 3629(1) | 3051(1) | -717(1)  | 14(1) |
| C(30) | 3789(1) | 1794(1) | -592(1)  | 17(1) |
| C(31) | 4874(1) | 924(1)  | -1281(1) | 21(1) |
| C(32) | 5798(1) | 1307(1) | -2104(1) | 22(1) |
| C(33) | 5640(1) | 2568(1) | -2248(1) | 22(1) |
| C(34) | 4569(1) | 3430(1) | -1554(1) | 18(1) |

---

Table 3. Bond lengths [Å] and angles [°] for JF2954FMI\_MO\_190K.

---

|              |            |
|--------------|------------|
| C(1)-C(11)   | 1.5243(16) |
| C(1)-C(2)    | 1.5470(16) |
| C(1)-C(10)   | 1.5558(16) |
| C(1)-H(1)    | 0.999(16)  |
| C(2)-C(19)   | 1.5232(16) |
| C(2)-C(3)    | 1.5329(15) |
| C(2)-H(2)    | 0.973(15)  |
| C(3)-O(4)    | 1.4269(14) |
| C(3)-O(3)    | 1.4324(14) |
| C(3)-C(4)    | 1.5247(16) |
| O(3)-C(27)   | 1.4359(14) |
| C(4)-C(9)    | 1.3971(17) |
| C(4)-C(5)    | 1.4059(17) |
| O(4)-C(28)   | 1.4437(15) |
| C(5)-C(6)    | 1.3869(19) |
| C(5)-H(5)    | 0.965(17)  |
| C(6)-C(7)    | 1.394(2)   |
| C(6)-H(6)    | 0.977(19)  |
| C(7)-C(8)    | 1.3894(18) |
| C(7)-H(7)    | 0.980(17)  |
| C(8)-C(9)    | 1.4048(17) |
| C(8)-H(8)    | 0.963(16)  |
| C(9)-C(10)   | 1.5261(16) |
| C(10)-C(29)  | 1.5272(16) |
| C(10)-H(10)  | 0.986(15)  |
| C(11)-O(11)  | 1.4587(14) |
| C(11)-H(11A) | 0.991(15)  |
| C(11)-H(11B) | 0.972(17)  |
| O(11)-C(12)  | 1.3452(14) |
| C(12)-O(12)  | 1.2073(16) |
| C(12)-C(13)  | 1.4990(17) |
| C(13)-C(18)  | 1.3950(17) |
| C(13)-C(14)  | 1.3962(18) |
| C(14)-C(15)  | 1.3902(19) |

|              |            |
|--------------|------------|
| C(14)-H(14)  | 0.957(19)  |
| C(15)-C(16)  | 1.3859(19) |
| C(15)-H(15)  | 0.968(17)  |
| C(16)-C(17)  | 1.3818(19) |
| C(16)-N(16)  | 1.4772(16) |
| N(16)-O(17)  | 1.2255(16) |
| N(16)-O(16)  | 1.2286(16) |
| C(17)-C(18)  | 1.3895(18) |
| C(17)-H(17)  | 0.950(18)  |
| C(18)-H(18)  | 0.969(16)  |
| C(19)-O(19)  | 1.4540(13) |
| C(19)-H(19A) | 0.979(15)  |
| C(19)-H(19B) | 0.971(16)  |
| O(19)-C(20)  | 1.3427(15) |
| C(20)-O(20)  | 1.2075(16) |
| C(20)-C(21)  | 1.4967(16) |
| C(21)-C(22)  | 1.3948(18) |
| C(21)-C(26)  | 1.3982(17) |
| C(22)-C(23)  | 1.3884(17) |
| C(22)-H(22)  | 0.944(18)  |
| C(23)-C(24)  | 1.3863(18) |
| C(23)-H(23)  | 0.946(17)  |
| C(24)-C(25)  | 1.3863(18) |
| C(24)-N(24)  | 1.4771(15) |
| N(24)-O(24)  | 1.2254(15) |
| N(24)-O(25)  | 1.2274(15) |
| C(25)-C(26)  | 1.3900(17) |
| C(25)-H(25)  | 0.950(19)  |
| C(26)-H(26)  | 0.989(18)  |
| C(27)-C(28)  | 1.5195(17) |
| C(27)-H(27A) | 0.992(16)  |
| C(27)-H(27B) | 0.958(17)  |
| C(28)-H(28A) | 1.005(17)  |
| C(28)-H(28B) | 0.987(18)  |
| C(29)-C(30)  | 1.3909(17) |
| C(29)-C(34)  | 1.3991(17) |

|             |            |
|-------------|------------|
| C(30)-C(31) | 1.4002(18) |
| C(30)-H(30) | 0.975(16)  |
| C(31)-C(32) | 1.3813(19) |
| C(31)-H(31) | 0.995(17)  |
| C(32)-C(33) | 1.3931(19) |
| C(32)-H(32) | 0.979(17)  |
| C(33)-C(34) | 1.3941(18) |
| C(33)-H(33) | 0.961(19)  |
| C(34)-H(34) | 0.992(16)  |

|                  |            |
|------------------|------------|
| C(11)-C(1)-C(2)  | 114.31(9)  |
| C(11)-C(1)-C(10) | 107.44(9)  |
| C(2)-C(1)-C(10)  | 110.59(9)  |
| C(11)-C(1)-H(1)  | 106.6(9)   |
| C(2)-C(1)-H(1)   | 108.4(9)   |
| C(10)-C(1)-H(1)  | 109.3(9)   |
| C(19)-C(2)-C(3)  | 109.28(9)  |
| C(19)-C(2)-C(1)  | 114.43(10) |
| C(3)-C(2)-C(1)   | 107.93(9)  |
| C(19)-C(2)-H(2)  | 108.8(9)   |
| C(3)-C(2)-H(2)   | 106.0(9)   |
| C(1)-C(2)-H(2)   | 110.1(9)   |
| O(4)-C(3)-O(3)   | 106.44(9)  |
| O(4)-C(3)-C(4)   | 109.61(9)  |
| O(3)-C(3)-C(4)   | 111.76(9)  |
| O(4)-C(3)-C(2)   | 110.85(9)  |
| O(3)-C(3)-C(2)   | 107.31(9)  |
| C(4)-C(3)-C(2)   | 110.78(10) |
| C(3)-O(3)-C(27)  | 105.74(9)  |
| C(9)-C(4)-C(5)   | 119.91(11) |
| C(9)-C(4)-C(3)   | 119.77(10) |
| C(5)-C(4)-C(3)   | 120.31(11) |
| C(3)-O(4)-C(28)  | 108.94(9)  |
| C(6)-C(5)-C(4)   | 120.68(12) |
| C(6)-C(5)-H(5)   | 120.0(10)  |
| C(4)-C(5)-H(5)   | 119.3(10)  |

|                     |            |
|---------------------|------------|
| C(5)-C(6)-C(7)      | 119.66(12) |
| C(5)-C(6)-H(6)      | 119.7(11)  |
| C(7)-C(6)-H(6)      | 120.6(11)  |
| C(8)-C(7)-C(6)      | 119.91(12) |
| C(8)-C(7)-H(7)      | 120.0(10)  |
| C(6)-C(7)-H(7)      | 120.0(10)  |
| C(7)-C(8)-C(9)      | 121.10(12) |
| C(7)-C(8)-H(8)      | 119.6(9)   |
| C(9)-C(8)-H(8)      | 119.3(9)   |
| C(4)-C(9)-C(8)      | 118.72(11) |
| C(4)-C(9)-C(10)     | 123.11(10) |
| C(8)-C(9)-C(10)     | 118.15(11) |
| C(9)-C(10)-C(29)    | 111.21(9)  |
| C(9)-C(10)-C(1)     | 114.00(10) |
| C(29)-C(10)-C(1)    | 110.79(9)  |
| C(9)-C(10)-H(10)    | 106.0(8)   |
| C(29)-C(10)-H(10)   | 106.4(8)   |
| C(1)-C(10)-H(10)    | 108.0(8)   |
| O(11)-C(11)-C(1)    | 108.87(9)  |
| O(11)-C(11)-H(11A)  | 108.8(9)   |
| C(1)-C(11)-H(11A)   | 112.7(9)   |
| O(11)-C(11)-H(11B)  | 107.7(10)  |
| C(1)-C(11)-H(11B)   | 111.0(10)  |
| H(11A)-C(11)-H(11B) | 107.7(13)  |
| C(12)-O(11)-C(11)   | 115.12(9)  |
| O(12)-C(12)-O(11)   | 123.50(11) |
| O(12)-C(12)-C(13)   | 124.21(11) |
| O(11)-C(12)-C(13)   | 112.29(10) |
| C(18)-C(13)-C(14)   | 120.04(12) |
| C(18)-C(13)-C(12)   | 117.75(11) |
| C(14)-C(13)-C(12)   | 122.21(11) |
| C(15)-C(14)-C(13)   | 120.20(12) |
| C(15)-C(14)-H(14)   | 121.2(11)  |
| C(13)-C(14)-H(14)   | 118.6(11)  |
| C(16)-C(15)-C(14)   | 118.13(13) |
| C(16)-C(15)-H(15)   | 121.2(10)  |

|                     |            |
|---------------------|------------|
| C(14)-C(15)-H(15)   | 120.7(10)  |
| C(17)-C(16)-C(15)   | 123.12(12) |
| C(17)-C(16)-N(16)   | 118.52(12) |
| C(15)-C(16)-N(16)   | 118.34(12) |
| O(17)-N(16)-O(16)   | 123.73(12) |
| O(17)-N(16)-C(16)   | 117.81(11) |
| O(16)-N(16)-C(16)   | 118.45(12) |
| C(16)-C(17)-C(18)   | 118.07(12) |
| C(16)-C(17)-H(17)   | 120.8(10)  |
| C(18)-C(17)-H(17)   | 121.1(10)  |
| C(17)-C(18)-C(13)   | 120.42(12) |
| C(17)-C(18)-H(18)   | 120.2(9)   |
| C(13)-C(18)-H(18)   | 119.4(9)   |
| O(19)-C(19)-C(2)    | 107.30(9)  |
| O(19)-C(19)-H(19A)  | 108.1(8)   |
| C(2)-C(19)-H(19A)   | 112.1(8)   |
| O(19)-C(19)-H(19B)  | 108.5(9)   |
| C(2)-C(19)-H(19B)   | 111.7(9)   |
| H(19A)-C(19)-H(19B) | 109.0(12)  |
| C(20)-O(19)-C(19)   | 114.62(9)  |
| O(20)-C(20)-O(19)   | 124.22(11) |
| O(20)-C(20)-C(21)   | 123.94(11) |
| O(19)-C(20)-C(21)   | 111.80(10) |
| C(22)-C(21)-C(26)   | 120.40(11) |
| C(22)-C(21)-C(20)   | 122.48(11) |
| C(26)-C(21)-C(20)   | 117.06(11) |
| C(23)-C(22)-C(21)   | 120.32(12) |
| C(23)-C(22)-H(22)   | 120.1(10)  |
| C(21)-C(22)-H(22)   | 119.6(10)  |
| C(24)-C(23)-C(22)   | 117.93(12) |
| C(24)-C(23)-H(23)   | 121.0(10)  |
| C(22)-C(23)-H(23)   | 121.1(10)  |
| C(25)-C(24)-C(23)   | 123.26(11) |
| C(25)-C(24)-N(24)   | 118.20(11) |
| C(23)-C(24)-N(24)   | 118.51(11) |
| O(24)-N(24)-O(25)   | 124.45(11) |



|                     |            |
|---------------------|------------|
| O(24)-N(24)-C(24)   | 118.03(11) |
| O(25)-N(24)-C(24)   | 117.51(11) |
| C(24)-C(25)-C(26)   | 118.16(12) |
| C(24)-C(25)-H(25)   | 119.1(11)  |
| C(26)-C(25)-H(25)   | 122.7(11)  |
| C(25)-C(26)-C(21)   | 119.94(12) |
| C(25)-C(26)-H(26)   | 120.1(10)  |
| C(21)-C(26)-H(26)   | 119.9(10)  |
| O(3)-C(27)-C(28)    | 102.76(9)  |
| O(3)-C(27)-H(27A)   | 109.5(9)   |
| C(28)-C(27)-H(27A)  | 112.0(9)   |
| O(3)-C(27)-H(27B)   | 107.8(10)  |
| C(28)-C(27)-H(27B)  | 114.4(10)  |
| H(27A)-C(27)-H(27B) | 110.1(13)  |
| O(4)-C(28)-C(27)    | 103.40(10) |
| O(4)-C(28)-H(28A)   | 108.0(9)   |
| C(27)-C(28)-H(28A)  | 112.5(10)  |
| O(4)-C(28)-H(28B)   | 109.5(10)  |
| C(27)-C(28)-H(28B)  | 113.5(10)  |
| H(28A)-C(28)-H(28B) | 109.7(14)  |
| C(30)-C(29)-C(34)   | 118.49(11) |
| C(30)-C(29)-C(10)   | 121.30(10) |
| C(34)-C(29)-C(10)   | 120.22(11) |
| C(29)-C(30)-C(31)   | 120.79(12) |
| C(29)-C(30)-H(30)   | 120.7(9)   |
| C(31)-C(30)-H(30)   | 118.5(9)   |
| C(32)-C(31)-C(30)   | 120.27(12) |
| C(32)-C(31)-H(31)   | 120.2(10)  |
| C(30)-C(31)-H(31)   | 119.4(10)  |
| C(31)-C(32)-C(33)   | 119.56(12) |
| C(31)-C(32)-H(32)   | 120.2(10)  |
| C(33)-C(32)-H(32)   | 120.2(10)  |
| C(32)-C(33)-C(34)   | 120.16(12) |
| C(32)-C(33)-H(33)   | 121.4(11)  |
| C(34)-C(33)-H(33)   | 118.4(11)  |
| C(33)-C(34)-C(29)   | 120.71(12) |

C(33)-C(34)-H(34) 121.0(9)

C(29)-C(34)-H(34) 118.3(9)

---

Symmetry transformations used to generate equivalent atoms:

Table 4. Anisotropic displacement parameters ( $\text{\AA}^2 \times 10^3$ ) for JF2954FMI\_MO\_190K. The anisotropic displacement factor exponent takes the form:  $-2\pi^2 [ h^2 a^{*2}U^{11} + \dots + 2 h k a^* b^* U^{12} ]$

|       | U <sup>11</sup> | U <sup>22</sup> | U <sup>33</sup> | U <sup>23</sup> | U <sup>13</sup> | U <sup>12</sup> |
|-------|-----------------|-----------------|-----------------|-----------------|-----------------|-----------------|
| C(1)  | 16(1)           | 13(1)           | 12(1)           | 0(1)            | -5(1)           | -5(1)           |
| C(2)  | 15(1)           | 13(1)           | 12(1)           | 0(1)            | -2(1)           | -6(1)           |
| C(3)  | 14(1)           | 13(1)           | 14(1)           | -1(1)           | -1(1)           | -4(1)           |
| O(3)  | 15(1)           | 13(1)           | 18(1)           | 1(1)            | -2(1)           | -5(1)           |
| C(4)  | 14(1)           | 17(1)           | 13(1)           | 0(1)            | -2(1)           | -5(1)           |
| O(4)  | 16(1)           | 13(1)           | 19(1)           | -4(1)           | 0(1)            | -5(1)           |
| C(5)  | 20(1)           | 16(1)           | 19(1)           | 1(1)            | -6(1)           | -5(1)           |
| C(6)  | 19(1)           | 23(1)           | 19(1)           | 4(1)            | -8(1)           | -5(1)           |
| C(7)  | 18(1)           | 29(1)           | 16(1)           | 0(1)            | -6(1)           | -10(1)          |
| C(8)  | 18(1)           | 21(1)           | 16(1)           | -1(1)           | -5(1)           | -8(1)           |
| C(9)  | 13(1)           | 17(1)           | 12(1)           | 0(1)            | -3(1)           | -6(1)           |
| C(10) | 15(1)           | 13(1)           | 13(1)           | 0(1)            | -4(1)           | -6(1)           |
| C(11) | 18(1)           | 14(1)           | 15(1)           | 1(1)            | -7(1)           | -7(1)           |
| O(11) | 17(1)           | 16(1)           | 15(1)           | 3(1)            | -8(1)           | -7(1)           |
| C(12) | 18(1)           | 14(1)           | 12(1)           | -1(1)           | -4(1)           | -4(1)           |
| O(12) | 37(1)           | 21(1)           | 26(1)           | 7(1)            | -18(1)          | -16(1)          |
| C(13) | 14(1)           | 18(1)           | 12(1)           | -2(1)           | -2(1)           | -4(1)           |
| C(14) | 20(1)           | 22(1)           | 20(1)           | 2(1)            | -7(1)           | -9(1)           |
| C(15) | 23(1)           | 26(1)           | 24(1)           | 0(1)            | -7(1)           | -13(1)          |
| C(16) | 16(1)           | 31(1)           | 15(1)           | -4(1)           | -3(1)           | -9(1)           |
| N(16) | 21(1)           | 41(1)           | 18(1)           | -4(1)           | -6(1)           | -14(1)          |
| O(16) | 31(1)           | 58(1)           | 21(1)           | 6(1)            | -14(1)          | -21(1)          |
| C(17) | 18(1)           | 24(1)           | 15(1)           | 0(1)            | -6(1)           | -5(1)           |
| O(17) | 36(1)           | 58(1)           | 32(1)           | 4(1)            | -15(1)          | -32(1)          |
| C(18) | 19(1)           | 18(1)           | 16(1)           | -1(1)           | -4(1)           | -5(1)           |
| C(19) | 21(1)           | 16(1)           | 11(1)           | 0(1)            | -3(1)           | -10(1)          |
| O(19) | 21(1)           | 19(1)           | 10(1)           | 1(1)            | -3(1)           | -10(1)          |
| C(20) | 22(1)           | 15(1)           | 13(1)           | -3(1)           | -4(1)           | -7(1)           |
| O(20) | 47(1)           | 32(1)           | 19(1)           | 4(1)            | -13(1)          | -28(1)          |
| C(21) | 21(1)           | 15(1)           | 12(1)           | -2(1)           | -2(1)           | -7(1)           |
| C(22) | 18(1)           | 19(1)           | 14(1)           | -2(1)           | -4(1)           | -6(1)           |

|       |       |       |       |       |        |        |
|-------|-------|-------|-------|-------|--------|--------|
| C(23) | 18(1) | 19(1) | 18(1) | -3(1) | -2(1)  | -9(1)  |
| C(24) | 19(1) | 15(1) | 14(1) | 1(1)  | -1(1)  | -6(1)  |
| N(24) | 20(1) | 18(1) | 18(1) | 0(1)  | 0(1)   | -7(1)  |
| O(24) | 30(1) | 22(1) | 23(1) | -3(1) | 1(1)   | -15(1) |
| C(25) | 27(1) | 24(1) | 15(1) | 1(1)  | -8(1)  | -12(1) |
| O(25) | 36(1) | 37(1) | 27(1) | 16(1) | -17(1) | -21(1) |
| C(26) | 28(1) | 23(1) | 16(1) | 0(1)  | -7(1)  | -15(1) |
| C(27) | 19(1) | 14(1) | 21(1) | 2(1)  | -2(1)  | -8(1)  |
| C(28) | 21(1) | 15(1) | 23(1) | -2(1) | -2(1)  | -8(1)  |
| C(29) | 16(1) | 16(1) | 12(1) | -1(1) | -6(1)  | -6(1)  |
| C(30) | 23(1) | 17(1) | 13(1) | 1(1)  | -6(1)  | -9(1)  |
| C(31) | 28(1) | 14(1) | 19(1) | -1(1) | -10(1) | -5(1)  |
| C(32) | 22(1) | 22(1) | 18(1) | -8(1) | -5(1)  | -3(1)  |
| C(33) | 21(1) | 26(1) | 18(1) | -5(1) | -2(1)  | -11(1) |
| C(34) | 20(1) | 18(1) | 18(1) | -3(1) | -4(1)  | -9(1)  |

---

Table 5. Hydrogen coordinates ( $\times 10^4$ ) and isotropic displacement parameters ( $\text{\AA}^2 \times 10^{-3}$ ) for JF2954FMI\_MO\_190K.

|        | x        | y        | z         | U(eq) |
|--------|----------|----------|-----------|-------|
| H(1)   | 3874(16) | 4295(15) | 561(13)   | 18(4) |
| H(2)   | 1045(15) | 5471(14) | 1689(12)  | 14(3) |
| H(5)   | 378(17)  | 8375(16) | -893(14)  | 24(4) |
| H(6)   | -347(18) | 8190(18) | -2344(15) | 33(5) |
| H(7)   | 218(17)  | 6122(16) | -2743(14) | 24(4) |
| H(8)   | 1426(16) | 4297(15) | -1638(13) | 18(4) |
| H(10)  | 1812(15) | 3612(14) | 431(12)   | 13(3) |
| H(11A) | 2462(15) | 3012(14) | 2332(12)  | 15(3) |
| H(11B) | 3701(17) | 2257(16) | 1401(14)  | 23(4) |
| H(14)  | 5642(19) | 3643(18) | 2889(15)  | 33(5) |
| H(15)  | 7275(17) | 3542(17) | 3741(14)  | 27(4) |
| H(17)  | 7558(17) | 20(17)   | 5346(14)  | 27(4) |
| H(18)  | 5908(16) | 147(15)  | 4511(13)  | 18(4) |
| H(19A) | 3298(15) | 5455(14) | 2241(12)  | 12(3) |
| H(19B) | 1824(16) | 6583(15) | 2518(12)  | 17(4) |
| H(22)  | 802(17)  | 3560(16) | 4612(14)  | 26(4) |
| H(23)  | 541(17)  | 1948(16) | 6043(14)  | 25(4) |
| H(25)  | 3196(19) | 2160(17) | 7402(15)  | 34(5) |
| H(26)  | 3506(18) | 3791(17) | 5941(14)  | 30(4) |
| H(27A) | 2782(16) | 8191(15) | -987(13)  | 19(4) |
| H(27B) | 3731(17) | 8012(16) | -214(13)  | 24(4) |
| H(28A) | 1876(17) | 8627(16) | 1324(14)  | 25(4) |
| H(28B) | 1072(18) | 9457(17) | 349(14)   | 29(4) |
| H(30)  | 3131(16) | 1507(15) | -38(13)   | 21(4) |
| H(31)  | 4950(17) | 38(17)   | -1194(14) | 27(4) |
| H(32)  | 6532(17) | 708(16)  | -2606(14) | 24(4) |
| H(33)  | 6267(19) | 2861(17) | -2813(15) | 33(5) |
| H(34)  | 4442(16) | 4330(16) | -1650(13) | 21(4) |

Table 6. Torsion angles [°] for JF2954FMI\_MO\_190K.

---

|                       |             |
|-----------------------|-------------|
| C(11)-C(1)-C(2)-C(19) | 53.30(13)   |
| C(10)-C(1)-C(2)-C(19) | 174.69(9)   |
| C(11)-C(1)-C(2)-C(3)  | 175.18(9)   |
| C(10)-C(1)-C(2)-C(3)  | -63.42(12)  |
| C(19)-C(2)-C(3)-O(4)  | -52.91(12)  |
| C(1)-C(2)-C(3)-O(4)   | -177.91(9)  |
| C(19)-C(2)-C(3)-O(3)  | 62.94(11)   |
| C(1)-C(2)-C(3)-O(3)   | -62.07(12)  |
| C(19)-C(2)-C(3)-C(4)  | -174.81(9)  |
| C(1)-C(2)-C(3)-C(4)   | 60.18(12)   |
| O(4)-C(3)-O(3)-C(27)  | -28.40(11)  |
| C(4)-C(3)-O(3)-C(27)  | 91.24(11)   |
| C(2)-C(3)-O(3)-C(27)  | -147.12(10) |
| O(4)-C(3)-C(4)-C(9)   | -152.94(10) |
| O(3)-C(3)-C(4)-C(9)   | 89.30(12)   |
| C(2)-C(3)-C(4)-C(9)   | -30.31(14)  |
| O(4)-C(3)-C(4)-C(5)   | 27.06(14)   |
| O(3)-C(3)-C(4)-C(5)   | -90.70(13)  |
| C(2)-C(3)-C(4)-C(5)   | 149.70(11)  |
| O(3)-C(3)-O(4)-C(28)  | 8.37(12)    |
| C(4)-C(3)-O(4)-C(28)  | -112.66(10) |
| C(2)-C(3)-O(4)-C(28)  | 124.75(10)  |
| C(9)-C(4)-C(5)-C(6)   | -1.34(18)   |
| C(3)-C(4)-C(5)-C(6)   | 178.65(11)  |
| C(4)-C(5)-C(6)-C(7)   | 1.10(19)    |
| C(5)-C(6)-C(7)-C(8)   | 0.10(19)    |
| C(6)-C(7)-C(8)-C(9)   | -1.06(19)   |
| C(5)-C(4)-C(9)-C(8)   | 0.39(17)    |
| C(3)-C(4)-C(9)-C(8)   | -179.61(10) |
| C(5)-C(4)-C(9)-C(10)  | -177.80(11) |
| C(3)-C(4)-C(9)-C(10)  | 2.21(17)    |
| C(7)-C(8)-C(9)-C(4)   | 0.81(17)    |
| C(7)-C(8)-C(9)-C(10)  | 179.08(11)  |
| C(4)-C(9)-C(10)-C(29) | -131.08(11) |

|                         |             |
|-------------------------|-------------|
| C(8)-C(9)-C(10)-C(29)   | 50.73(14)   |
| C(4)-C(9)-C(10)-C(1)    | -4.96(15)   |
| C(8)-C(9)-C(10)-C(1)    | 176.85(10)  |
| C(11)-C(1)-C(10)-C(9)   | 160.84(10)  |
| C(2)-C(1)-C(10)-C(9)    | 35.47(13)   |
| C(11)-C(1)-C(10)-C(29)  | -72.82(11)  |
| C(2)-C(1)-C(10)-C(29)   | 161.81(9)   |
| C(2)-C(1)-C(11)-O(11)   | -79.72(12)  |
| C(10)-C(1)-C(11)-O(11)  | 157.17(9)   |
| C(1)-C(11)-O(11)-C(12)  | -179.02(9)  |
| C(11)-O(11)-C(12)-O(12) | -0.16(17)   |
| C(11)-O(11)-C(12)-C(13) | 179.92(9)   |
| O(12)-C(12)-C(13)-C(18) | 4.49(18)    |
| O(11)-C(12)-C(13)-C(18) | -175.59(10) |
| O(12)-C(12)-C(13)-C(14) | -175.39(12) |
| O(11)-C(12)-C(13)-C(14) | 4.53(16)    |
| C(18)-C(13)-C(14)-C(15) | 1.05(19)    |
| C(12)-C(13)-C(14)-C(15) | -179.07(12) |
| C(13)-C(14)-C(15)-C(16) | 0.2(2)      |
| C(14)-C(15)-C(16)-C(17) | -1.6(2)     |
| C(14)-C(15)-C(16)-N(16) | 176.62(12)  |
| C(17)-C(16)-N(16)-O(17) | 159.12(13)  |
| C(15)-C(16)-N(16)-O(17) | -19.22(19)  |
| C(17)-C(16)-N(16)-O(16) | -19.53(18)  |
| C(15)-C(16)-N(16)-O(16) | 162.14(13)  |
| C(15)-C(16)-C(17)-C(18) | 1.73(19)    |
| N(16)-C(16)-C(17)-C(18) | -176.52(11) |
| C(16)-C(17)-C(18)-C(13) | -0.39(18)   |
| C(14)-C(13)-C(18)-C(17) | -0.96(18)   |
| C(12)-C(13)-C(18)-C(17) | 179.16(11)  |
| C(3)-C(2)-C(19)-O(19)   | 159.73(9)   |
| C(1)-C(2)-C(19)-O(19)   | -79.13(12)  |
| C(2)-C(19)-O(19)-C(20)  | 166.88(10)  |
| C(19)-O(19)-C(20)-O(20) | 6.30(17)    |
| C(19)-O(19)-C(20)-C(21) | -171.71(10) |
| O(20)-C(20)-C(21)-C(22) | 171.60(13)  |

|                         |             |
|-------------------------|-------------|
| O(19)-C(20)-C(21)-C(22) | -10.38(16)  |
| O(20)-C(20)-C(21)-C(26) | -10.95(19)  |
| O(19)-C(20)-C(21)-C(26) | 167.08(11)  |
| C(26)-C(21)-C(22)-C(23) | -0.26(19)   |
| C(20)-C(21)-C(22)-C(23) | 177.11(11)  |
| C(21)-C(22)-C(23)-C(24) | -0.24(18)   |
| C(22)-C(23)-C(24)-C(25) | 0.54(19)    |
| C(22)-C(23)-C(24)-N(24) | -177.28(11) |
| C(25)-C(24)-N(24)-O(24) | -169.54(11) |
| C(23)-C(24)-N(24)-O(24) | 8.39(17)    |
| C(25)-C(24)-N(24)-O(25) | 9.57(17)    |
| C(23)-C(24)-N(24)-O(25) | -172.49(12) |
| C(23)-C(24)-C(25)-C(26) | -0.3(2)     |
| N(24)-C(24)-C(25)-C(26) | 177.50(11)  |
| C(24)-C(25)-C(26)-C(21) | -0.2(2)     |
| C(22)-C(21)-C(26)-C(25) | 0.48(19)    |
| C(20)-C(21)-C(26)-C(25) | -177.03(12) |
| C(3)-O(3)-C(27)-C(28)   | 36.02(12)   |
| C(3)-O(4)-C(28)-C(27)   | 13.52(13)   |
| O(3)-C(27)-C(28)-O(4)   | -30.13(12)  |
| C(9)-C(10)-C(29)-C(30)  | -128.79(12) |
| C(1)-C(10)-C(29)-C(30)  | 103.33(12)  |
| C(9)-C(10)-C(29)-C(34)  | 51.41(14)   |
| C(1)-C(10)-C(29)-C(34)  | -76.47(13)  |
| C(34)-C(29)-C(30)-C(31) | 0.60(18)    |
| C(10)-C(29)-C(30)-C(31) | -179.20(11) |
| C(29)-C(30)-C(31)-C(32) | -0.49(19)   |
| C(30)-C(31)-C(32)-C(33) | -0.3(2)     |
| C(31)-C(32)-C(33)-C(34) | 1.0(2)      |
| C(32)-C(33)-C(34)-C(29) | -0.9(2)     |
| C(30)-C(29)-C(34)-C(33) | 0.11(18)    |
| C(10)-C(29)-C(34)-C(33) | 179.91(11)  |



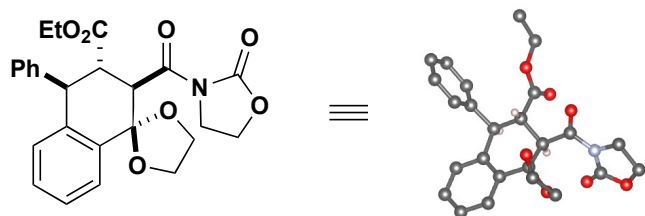

CCDC 2087133

Table 1. Crystal data and structure refinement for  $[\text{C}_{25}\text{H}_{25}\text{NO}_7]_2[\text{C}_4\text{H}_8\text{O}_2]_{0.5}$ .

|                                  |                                                                             |                   |
|----------------------------------|-----------------------------------------------------------------------------|-------------------|
| Identification code              | JF3005FMI                                                                   | (JMR-1-159-B)     |
| Empirical formula                | C <sub>52</sub> H <sub>54</sub> N <sub>2</sub> O <sub>15</sub>              |                   |
| Formula weight                   | 946.97                                                                      |                   |
| Temperature                      | 100(2) K                                                                    |                   |
| Wavelength                       | 0.71073 Å                                                                   |                   |
| Crystal system                   | Triclinic                                                                   |                   |
| Space group                      | P-1                                                                         |                   |
| Unit cell dimensions             | a = 9.7429(7) Å                                                             | ∠ = 67.1270(15)°. |
|                                  | b = 14.3116(10) Å                                                           | ∠ = 81.5420(16)°. |
|                                  | c = 18.0645(12) Å                                                           | ∠ = 80.5606(17)°. |
| Volume                           | 2279.7(3) Å <sup>3</sup>                                                    |                   |
| Z                                | 2                                                                           |                   |
| Density (calculated)             | 1.380 Mg/m <sup>3</sup>                                                     |                   |
| Absorption coefficient           | 0.102 mm <sup>-1</sup>                                                      |                   |
| F(000)                           | 1000                                                                        |                   |
| Crystal size                     | 0.596 x 0.577 x 0.232 mm <sup>3</sup>                                       |                   |
| Crystal color and habit          | Colourless Block                                                            |                   |
| Diffractometer                   | Bruker Photon100 CMOS                                                       |                   |
| Theta range for data collection  | 2.128 to 30.684°.                                                           |                   |
| Index ranges                     | -13 ≤ h ≤ 13, -20 ≤ k ≤ 20, -25 ≤ l ≤ 25                                    |                   |
| Reflections collected            | 28137                                                                       |                   |
| Independent reflections          | 14103 [R(int) = 0.0169]                                                     |                   |
| Observed reflections (I > 2σ(I)) | 12151                                                                       |                   |
| Completeness to theta = 25.242°  | 100.0 %                                                                     |                   |
| Absorption correction            | Semi-empirical from equivalents                                             |                   |
| Max. and min. transmission       | 0.9660 and 0.8837                                                           |                   |
| Solution method                  | SHELXT (Sheldrick, 2014)                                                    |                   |
| Refinement method                | SHELXL-2017/1 (Sheldrick, 2017) Full-matrix least-squares on F <sup>2</sup> |                   |
| Data / restraints / parameters   | 14103 / 0 / 652                                                             |                   |

|                                      |                                       |
|--------------------------------------|---------------------------------------|
| Goodness-of-fit on $F^2$             | 1.037                                 |
| Final R indices [ $I > 2\sigma(I)$ ] | $R_1 = 0.0483$ , $wR_2 = 0.1297$      |
| R indices (all data)                 | $R_1 = 0.0554$ , $wR_2 = 0.1365$      |
| Extinction coefficient               | 0.0239(14)                            |
| Largest diff. peak and hole          | 0.534 and -0.351 e. $\text{\AA}^{-3}$ |

Table 2. Atomic coordinates ( $\times 10^4$ ) and equivalent isotropic displacement parameters ( $\text{\AA}^2 \times 10^3$ ) for JF3005FMI.  $U(\text{eq})$  is defined as one third of the trace of the orthogonalized  $U^{ij}$  tensor.

|       | x        | y        | z       | $U(\text{eq})$ |
|-------|----------|----------|---------|----------------|
| C(1)  | 7446(1)  | 6940(1)  | 1558(1) | 18(1)          |
| O(1)  | 6181(1)  | 7609(1)  | 1363(1) | 20(1)          |
| C(2)  | 8461(1)  | 7047(1)  | 797(1)  | 18(1)          |
| O(2)  | 8087(1)  | 7261(1)  | 2072(1) | 20(1)          |
| C(3)  | 9753(1)  | 6271(1)  | 1054(1) | 18(1)          |
| C(4)  | 9371(1)  | 5165(1)  | 1340(1) | 19(1)          |
| C(5)  | 8024(1)  | 5028(1)  | 1898(1) | 22(1)          |
| C(6)  | 7116(1)  | 5846(1)  | 1996(1) | 20(1)          |
| C(7)  | 5906(1)  | 5661(1)  | 2533(1) | 26(1)          |
| C(8)  | 5601(1)  | 4673(1)  | 2975(1) | 36(1)          |
| C(9)  | 6482(2)  | 3854(1)  | 2870(1) | 41(1)          |
| C(10) | 7669(1)  | 4033(1)  | 2329(1) | 33(1)          |
| C(11) | 6044(1)  | 8325(1)  | 1755(1) | 21(1)          |
| C(12) | 6993(1)  | 7801(1)  | 2430(1) | 21(1)          |
| C(13) | 8871(1)  | 8125(1)  | 434(1)  | 19(1)          |
| N(13) | 7926(1)  | 8916(1)  | -2(1)   | 20(1)          |
| O(13) | 9957(1)  | 8330(1)  | 560(1)  | 26(1)          |
| C(14) | 6790(1)  | 8864(1)  | -369(1) | 22(1)          |
| O(14) | 6412(1)  | 8136(1)  | -417(1) | 27(1)          |
| C(15) | 6822(1)  | 10560(1) | -574(1) | 30(1)          |
| O(15) | 6131(1)  | 9819(1)  | -701(1) | 27(1)          |
| C(16) | 8134(1)  | 9971(1)  | -170(1) | 23(1)          |
| C(17) | 10914(1) | 6438(1)  | 372(1)  | 21(1)          |
| O(17) | 10730(1) | 6628(1)  | -322(1) | 30(1)          |
| C(18) | 13372(1) | 6342(1)  | 52(1)   | 30(1)          |
| O(18) | 12167(1) | 6309(1)  | 641(1)  | 23(1)          |
| C(19) | 14654(1) | 6020(1)  | 508(1)  | 35(1)          |
| C(20) | 10598(1) | 4414(1)  | 1729(1) | 20(1)          |
| C(21) | 11512(1) | 3905(1)  | 1302(1) | 24(1)          |
| C(22) | 12694(1) | 3272(1)  | 1640(1) | 29(1)          |
| C(23) | 12958(1) | 3140(1)  | 2409(1) | 35(1)          |

|       |          |          |         |       |
|-------|----------|----------|---------|-------|
| C(24) | 12036(2) | 3629(1)  | 2847(1) | 34(1) |
| C(25) | 10866(1) | 4261(1)  | 2508(1) | 26(1) |
| C(31) | 1800(1)  | 7851(1)  | 3111(1) | 18(1) |
| O(31) | 716(1)   | 7229(1)  | 3255(1) | 22(1) |
| C(32) | 2453(1)  | 7637(1)  | 3897(1) | 18(1) |
| O(32) | 2852(1)  | 7579(1)  | 2559(1) | 20(1) |
| C(33) | 3609(1)  | 8330(1)  | 3681(1) | 18(1) |
| C(34) | 2940(1)  | 9452(1)  | 3456(1) | 18(1) |
| C(35) | 1851(1)  | 9723(1)  | 2856(1) | 19(1) |
| C(36) | 1254(1)  | 8977(1)  | 2729(1) | 19(1) |
| C(37) | 200(1)   | 9268(1)  | 2205(1) | 24(1) |
| C(38) | -256(1)  | 10297(1) | 1807(1) | 28(1) |
| C(39) | 340(1)   | 11042(1) | 1921(1) | 28(1) |
| C(40) | 1380(1)  | 10754(1) | 2446(1) | 25(1) |
| C(41) | 1194(1)  | 6482(1)  | 2897(1) | 22(1) |
| C(42) | 2227(1)  | 7013(1)  | 2214(1) | 22(1) |
| C(43) | 3054(1)  | 6526(1)  | 4260(1) | 20(1) |
| N(43) | 2241(1)  | 5821(1)  | 4834(1) | 22(1) |
| O(43) | 4236(1)  | 6228(1)  | 4057(1) | 26(1) |
| C(44) | 896(1)   | 5977(1)  | 5196(1) | 24(1) |
| O(44) | 108(1)   | 6746(1)  | 5068(1) | 35(1) |
| C(45) | 1766(1)  | 4308(1)  | 5862(1) | 29(1) |
| O(45) | 560(1)   | 5071(1)  | 5752(1) | 26(1) |
| C(46) | 2780(1)  | 4734(1)  | 5133(1) | 29(1) |
| C(47) | 4510(1)  | 8063(1)  | 4369(1) | 20(1) |
| O(47) | 4066(1)  | 7853(1)  | 5067(1) | 28(1) |
| C(48) | 6813(1)  | 8153(1)  | 4631(1) | 27(1) |
| O(48) | 5853(1)  | 8143(1)  | 4090(1) | 24(1) |
| C(49) | 8072(1)  | 8603(1)  | 4098(1) | 35(1) |
| C(50) | 4078(1)  | 10159(1) | 3182(1) | 20(1) |
| C(51) | 4538(1)  | 10481(1) | 3732(1) | 23(1) |
| C(52) | 5659(1)  | 11056(1) | 3512(1) | 27(1) |
| C(53) | 6326(1)  | 11323(1) | 2736(1) | 29(1) |
| C(54) | 5858(1)  | 11024(1) | 2181(1) | 27(1) |
| C(55) | 4744(1)  | 10444(1) | 2400(1) | 22(1) |
| C(61) | 10864(3) | 8464(2)  | 6037(2) | 33(1) |

|       |          |          |         |       |
|-------|----------|----------|---------|-------|
| O(61) | 8559(2)  | 9066(2)  | 5602(1) | 34(1) |
| C(62) | 9781(3)  | 9168(2)  | 5511(2) | 27(1) |
| O(62) | 10328(2) | 9962(2)  | 4918(1) | 35(1) |
| C(63) | 9374(3)  | 10696(2) | 4352(2) | 40(1) |
| C(64) | 10021(6) | 11666(3) | 3958(2) | 54(1) |

---

Table 3. Bond lengths [Å] and angles [°] for JF3005FMI.

---

|              |            |
|--------------|------------|
| C(1)-O(1)    | 1.4274(11) |
| C(1)-O(2)    | 1.4358(12) |
| C(1)-C(6)    | 1.5189(14) |
| C(1)-C(2)    | 1.5424(14) |
| O(1)-C(11)   | 1.4354(13) |
| C(2)-C(13)   | 1.5194(14) |
| C(2)-C(3)    | 1.5317(14) |
| C(2)-H(2)    | 1.0000     |
| O(2)-C(12)   | 1.4372(12) |
| C(3)-C(17)   | 1.5172(14) |
| C(3)-C(4)    | 1.5533(14) |
| C(3)-H(3)    | 1.0000     |
| C(4)-C(5)    | 1.5217(15) |
| C(4)-C(20)   | 1.5220(14) |
| C(4)-H(4)    | 1.0000     |
| C(5)-C(6)    | 1.4006(14) |
| C(5)-C(10)   | 1.4054(15) |
| C(6)-C(7)    | 1.4021(15) |
| C(7)-C(8)    | 1.3845(17) |
| C(7)-H(7)    | 0.9500     |
| C(8)-C(9)    | 1.3933(19) |
| C(8)-H(8)    | 0.9500     |
| C(9)-C(10)   | 1.3886(19) |
| C(9)-H(9)    | 0.9500     |
| C(10)-H(10)  | 0.9500     |
| C(11)-C(12)  | 1.5149(15) |
| C(11)-H(11A) | 0.9900     |
| C(11)-H(11B) | 0.9900     |
| C(12)-H(12A) | 0.9900     |
| C(12)-H(12B) | 0.9900     |
| C(13)-O(13)  | 1.2178(13) |
| C(13)-N(13)  | 1.3883(13) |
| N(13)-C(14)  | 1.3971(14) |
| N(13)-C(16)  | 1.4619(14) |

|              |            |
|--------------|------------|
| C(14)-O(14)  | 1.1964(14) |
| C(14)-O(15)  | 1.3526(13) |
| C(15)-O(15)  | 1.4491(15) |
| C(15)-C(16)  | 1.5234(16) |
| C(15)-H(15A) | 0.9900     |
| C(15)-H(15B) | 0.9900     |
| C(16)-H(16A) | 0.9900     |
| C(16)-H(16B) | 0.9900     |
| C(17)-O(17)  | 1.2101(14) |
| C(17)-O(18)  | 1.3379(13) |
| C(18)-O(18)  | 1.4569(13) |
| C(18)-C(19)  | 1.5070(18) |
| C(18)-H(18A) | 0.9900     |
| C(18)-H(18B) | 0.9900     |
| C(19)-H(19A) | 0.9800     |
| C(19)-H(19B) | 0.9800     |
| C(19)-H(19C) | 0.9800     |
| C(20)-C(21)  | 1.3927(15) |
| C(20)-C(25)  | 1.3960(15) |
| C(21)-C(22)  | 1.3981(16) |
| C(21)-H(21)  | 0.9500     |
| C(22)-C(23)  | 1.385(2)   |
| C(22)-H(22)  | 0.9500     |
| C(23)-C(24)  | 1.392(2)   |
| C(23)-H(23)  | 0.9500     |
| C(24)-C(25)  | 1.3895(17) |
| C(24)-H(24)  | 0.9500     |
| C(25)-H(25)  | 0.9500     |
| C(31)-O(31)  | 1.4218(12) |
| C(31)-O(32)  | 1.4373(12) |
| C(31)-C(36)  | 1.5226(14) |
| C(31)-C(32)  | 1.5432(14) |
| O(31)-C(41)  | 1.4370(13) |
| C(32)-C(43)  | 1.5154(14) |
| C(32)-C(33)  | 1.5304(14) |
| C(32)-H(32)  | 1.0000     |

|              |            |
|--------------|------------|
| O(32)-C(42)  | 1.4432(13) |
| C(33)-C(47)  | 1.5180(14) |
| C(33)-C(34)  | 1.5488(14) |
| C(33)-H(33)  | 1.0000     |
| C(34)-C(50)  | 1.5210(14) |
| C(34)-C(35)  | 1.5261(14) |
| C(34)-H(34)  | 1.0000     |
| C(35)-C(36)  | 1.4013(14) |
| C(35)-C(40)  | 1.4015(14) |
| C(36)-C(37)  | 1.4007(14) |
| C(37)-C(38)  | 1.3921(16) |
| C(37)-H(37)  | 0.9500     |
| C(38)-C(39)  | 1.3878(18) |
| C(38)-H(38)  | 0.9500     |
| C(39)-C(40)  | 1.3914(16) |
| C(39)-H(39)  | 0.9500     |
| C(40)-H(40)  | 0.9500     |
| C(41)-C(42)  | 1.5058(15) |
| C(41)-H(41A) | 0.9900     |
| C(41)-H(41B) | 0.9900     |
| C(42)-H(42A) | 0.9900     |
| C(42)-H(42B) | 0.9900     |
| C(43)-O(43)  | 1.2168(13) |
| C(43)-N(43)  | 1.3889(13) |
| N(43)-C(44)  | 1.4003(14) |
| N(43)-C(46)  | 1.4672(14) |
| C(44)-O(44)  | 1.1960(14) |
| C(44)-O(45)  | 1.3512(13) |
| C(45)-O(45)  | 1.4468(14) |
| C(45)-C(46)  | 1.5081(17) |
| C(45)-H(45A) | 0.9900     |
| C(45)-H(45B) | 0.9900     |
| C(46)-H(46A) | 0.9900     |
| C(46)-H(46B) | 0.9900     |
| C(47)-O(47)  | 1.2064(13) |
| C(47)-O(48)  | 1.3380(13) |



|                |            |
|----------------|------------|
| C(48)-O(48)    | 1.4547(13) |
| C(48)-C(49)    | 1.5082(18) |
| C(48)-H(48A)   | 0.9900     |
| C(48)-H(48B)   | 0.9900     |
| C(49)-H(49A)   | 0.9800     |
| C(49)-H(49B)   | 0.9800     |
| C(49)-H(49C)   | 0.9800     |
| C(50)-C(55)    | 1.3968(15) |
| C(50)-C(51)    | 1.3979(15) |
| C(51)-C(52)    | 1.3932(16) |
| C(51)-H(51)    | 0.9500     |
| C(52)-C(53)    | 1.3895(18) |
| C(52)-H(52)    | 0.9500     |
| C(53)-C(54)    | 1.3889(18) |
| C(53)-H(53)    | 0.9500     |
| C(54)-C(55)    | 1.3921(15) |
| C(54)-H(54)    | 0.9500     |
| C(55)-H(55)    | 0.9500     |
| C(61)-C(62)    | 1.494(4)   |
| C(61)-H(61A)   | 0.9800     |
| C(61)-H(61B)   | 0.9800     |
| C(61)-H(61C)   | 0.9800     |
| O(61)-C(62)    | 1.203(3)   |
| C(62)-O(62)    | 1.345(3)   |
| O(62)-C(63)    | 1.461(4)   |
| C(63)-C(64)    | 1.489(5)   |
| C(63)-H(63A)   | 0.9900     |
| C(63)-H(63B)   | 0.9900     |
| C(64)-H(64A)   | 0.9800     |
| C(64)-H(64B)   | 0.9800     |
| C(64)-H(64C)   | 0.9800     |
| O(1)-C(1)-O(2) | 106.15(7)  |
| O(1)-C(1)-C(6) | 109.81(8)  |
| O(2)-C(1)-C(6) | 110.50(8)  |
| O(1)-C(1)-C(2) | 111.27(8)  |

|                 |            |
|-----------------|------------|
| O(2)-C(1)-C(2)  | 107.89(8)  |
| C(6)-C(1)-C(2)  | 111.10(8)  |
| C(1)-O(1)-C(11) | 109.09(7)  |
| C(13)-C(2)-C(3) | 110.15(8)  |
| C(13)-C(2)-C(1) | 108.75(8)  |
| C(3)-C(2)-C(1)  | 107.81(8)  |
| C(13)-C(2)-H(2) | 110.0      |
| C(3)-C(2)-H(2)  | 110.0      |
| C(1)-C(2)-H(2)  | 110.0      |
| C(1)-O(2)-C(12) | 106.77(7)  |
| C(17)-C(3)-C(2) | 111.56(8)  |
| C(17)-C(3)-C(4) | 109.43(8)  |
| C(2)-C(3)-C(4)  | 110.44(8)  |
| C(17)-C(3)-H(3) | 108.4      |
| C(2)-C(3)-H(3)  | 108.4      |
| C(4)-C(3)-H(3)  | 108.4      |
| C(5)-C(4)-C(20) | 112.62(9)  |
| C(5)-C(4)-C(3)  | 111.30(8)  |
| C(20)-C(4)-C(3) | 109.24(8)  |
| C(5)-C(4)-H(4)  | 107.8      |
| C(20)-C(4)-H(4) | 107.8      |
| C(3)-C(4)-H(4)  | 107.8      |
| C(6)-C(5)-C(10) | 118.42(10) |
| C(6)-C(5)-C(4)  | 123.17(9)  |
| C(10)-C(5)-C(4) | 118.41(10) |
| C(5)-C(6)-C(7)  | 120.03(10) |
| C(5)-C(6)-C(1)  | 121.21(9)  |
| C(7)-C(6)-C(1)  | 118.71(9)  |
| C(8)-C(7)-C(6)  | 120.70(11) |
| C(8)-C(7)-H(7)  | 119.6      |
| C(6)-C(7)-H(7)  | 119.6      |
| C(7)-C(8)-C(9)  | 119.75(12) |
| C(7)-C(8)-H(8)  | 120.1      |
| C(9)-C(8)-H(8)  | 120.1      |
| C(10)-C(9)-C(8) | 119.85(12) |
| C(10)-C(9)-H(9) | 120.1      |

|                     |            |
|---------------------|------------|
| C(8)-C(9)-H(9)      | 120.1      |
| C(9)-C(10)-C(5)     | 121.18(11) |
| C(9)-C(10)-H(10)    | 119.4      |
| C(5)-C(10)-H(10)    | 119.4      |
| O(1)-C(11)-C(12)    | 103.14(8)  |
| O(1)-C(11)-H(11A)   | 111.1      |
| C(12)-C(11)-H(11A)  | 111.1      |
| O(1)-C(11)-H(11B)   | 111.1      |
| C(12)-C(11)-H(11B)  | 111.1      |
| H(11A)-C(11)-H(11B) | 109.1      |
| O(2)-C(12)-C(11)    | 102.09(8)  |
| O(2)-C(12)-H(12A)   | 111.4      |
| C(11)-C(12)-H(12A)  | 111.4      |
| O(2)-C(12)-H(12B)   | 111.4      |
| C(11)-C(12)-H(12B)  | 111.4      |
| H(12A)-C(12)-H(12B) | 109.2      |
| O(13)-C(13)-N(13)   | 118.69(9)  |
| O(13)-C(13)-C(2)    | 122.20(9)  |
| N(13)-C(13)-C(2)    | 118.89(9)  |
| C(13)-N(13)-C(14)   | 128.60(9)  |
| C(13)-N(13)-C(16)   | 119.32(9)  |
| C(14)-N(13)-C(16)   | 111.94(8)  |
| O(14)-C(14)-O(15)   | 122.52(10) |
| O(14)-C(14)-N(13)   | 129.26(10) |
| O(15)-C(14)-N(13)   | 108.21(9)  |
| O(15)-C(15)-C(16)   | 105.84(9)  |
| O(15)-C(15)-H(15A)  | 110.6      |
| C(16)-C(15)-H(15A)  | 110.6      |
| O(15)-C(15)-H(15B)  | 110.6      |
| C(16)-C(15)-H(15B)  | 110.6      |
| H(15A)-C(15)-H(15B) | 108.7      |
| C(14)-O(15)-C(15)   | 111.36(9)  |
| N(13)-C(16)-C(15)   | 101.80(9)  |
| N(13)-C(16)-H(16A)  | 111.4      |
| C(15)-C(16)-H(16A)  | 111.4      |
| N(13)-C(16)-H(16B)  | 111.4      |

|                     |            |
|---------------------|------------|
| C(15)-C(16)-H(16B)  | 111.4      |
| H(16A)-C(16)-H(16B) | 109.3      |
| O(17)-C(17)-O(18)   | 124.34(10) |
| O(17)-C(17)-C(3)    | 124.06(10) |
| O(18)-C(17)-C(3)    | 111.55(9)  |
| O(18)-C(18)-C(19)   | 107.03(10) |
| O(18)-C(18)-H(18A)  | 110.3      |
| C(19)-C(18)-H(18A)  | 110.3      |
| O(18)-C(18)-H(18B)  | 110.3      |
| C(19)-C(18)-H(18B)  | 110.3      |
| H(18A)-C(18)-H(18B) | 108.6      |
| C(17)-O(18)-C(18)   | 116.23(9)  |
| C(18)-C(19)-H(19A)  | 109.5      |
| C(18)-C(19)-H(19B)  | 109.5      |
| H(19A)-C(19)-H(19B) | 109.5      |
| C(18)-C(19)-H(19C)  | 109.5      |
| H(19A)-C(19)-H(19C) | 109.5      |
| H(19B)-C(19)-H(19C) | 109.5      |
| C(21)-C(20)-C(25)   | 118.78(10) |
| C(21)-C(20)-C(4)    | 120.82(9)  |
| C(25)-C(20)-C(4)    | 120.32(9)  |
| C(20)-C(21)-C(22)   | 120.66(11) |
| C(20)-C(21)-H(21)   | 119.7      |
| C(22)-C(21)-H(21)   | 119.7      |
| C(23)-C(22)-C(21)   | 119.91(11) |
| C(23)-C(22)-H(22)   | 120.0      |
| C(21)-C(22)-H(22)   | 120.0      |
| C(22)-C(23)-C(24)   | 119.88(11) |
| C(22)-C(23)-H(23)   | 120.1      |
| C(24)-C(23)-H(23)   | 120.1      |
| C(25)-C(24)-C(23)   | 120.08(12) |
| C(25)-C(24)-H(24)   | 120.0      |
| C(23)-C(24)-H(24)   | 120.0      |
| C(24)-C(25)-C(20)   | 120.67(11) |
| C(24)-C(25)-H(25)   | 119.7      |
| C(20)-C(25)-H(25)   | 119.7      |

|                   |            |
|-------------------|------------|
| O(31)-C(31)-O(32) | 106.46(8)  |
| O(31)-C(31)-C(36) | 110.66(8)  |
| O(32)-C(31)-C(36) | 109.40(8)  |
| O(31)-C(31)-C(32) | 111.04(8)  |
| O(32)-C(31)-C(32) | 108.72(8)  |
| C(36)-C(31)-C(32) | 110.45(8)  |
| C(31)-O(31)-C(41) | 108.31(8)  |
| C(43)-C(32)-C(33) | 110.20(8)  |
| C(43)-C(32)-C(31) | 110.63(8)  |
| C(33)-C(32)-C(31) | 107.16(8)  |
| C(43)-C(32)-H(32) | 109.6      |
| C(33)-C(32)-H(32) | 109.6      |
| C(31)-C(32)-H(32) | 109.6      |
| C(31)-O(32)-C(42) | 107.33(7)  |
| C(47)-C(33)-C(32) | 112.49(8)  |
| C(47)-C(33)-C(34) | 108.71(8)  |
| C(32)-C(33)-C(34) | 109.15(8)  |
| C(47)-C(33)-H(33) | 108.8      |
| C(32)-C(33)-H(33) | 108.8      |
| C(34)-C(33)-H(33) | 108.8      |
| C(50)-C(34)-C(35) | 114.30(8)  |
| C(50)-C(34)-C(33) | 109.84(8)  |
| C(35)-C(34)-C(33) | 111.41(8)  |
| C(50)-C(34)-H(34) | 107.0      |
| C(35)-C(34)-H(34) | 107.0      |
| C(33)-C(34)-H(34) | 107.0      |
| C(36)-C(35)-C(40) | 118.75(10) |
| C(36)-C(35)-C(34) | 122.39(9)  |
| C(40)-C(35)-C(34) | 118.79(9)  |
| C(37)-C(36)-C(35) | 119.95(10) |
| C(37)-C(36)-C(31) | 119.10(9)  |
| C(35)-C(36)-C(31) | 120.83(9)  |
| C(38)-C(37)-C(36) | 120.32(11) |
| C(38)-C(37)-H(37) | 119.8      |
| C(36)-C(37)-H(37) | 119.8      |
| C(39)-C(38)-C(37) | 120.17(10) |

|                     |            |
|---------------------|------------|
| C(39)-C(38)-H(38)   | 119.9      |
| C(37)-C(38)-H(38)   | 119.9      |
| C(38)-C(39)-C(40)   | 119.59(10) |
| C(38)-C(39)-H(39)   | 120.2      |
| C(40)-C(39)-H(39)   | 120.2      |
| C(39)-C(40)-C(35)   | 121.21(11) |
| C(39)-C(40)-H(40)   | 119.4      |
| C(35)-C(40)-H(40)   | 119.4      |
| O(31)-C(41)-C(42)   | 102.74(8)  |
| O(31)-C(41)-H(41A)  | 111.2      |
| C(42)-C(41)-H(41A)  | 111.2      |
| O(31)-C(41)-H(41B)  | 111.2      |
| C(42)-C(41)-H(41B)  | 111.2      |
| H(41A)-C(41)-H(41B) | 109.1      |
| O(32)-C(42)-C(41)   | 101.85(8)  |
| O(32)-C(42)-H(42A)  | 111.4      |
| C(41)-C(42)-H(42A)  | 111.4      |
| O(32)-C(42)-H(42B)  | 111.4      |
| C(41)-C(42)-H(42B)  | 111.4      |
| H(42A)-C(42)-H(42B) | 109.3      |
| O(43)-C(43)-N(43)   | 118.55(9)  |
| O(43)-C(43)-C(32)   | 121.71(9)  |
| N(43)-C(43)-C(32)   | 119.74(9)  |
| C(43)-N(43)-C(44)   | 129.51(9)  |
| C(43)-N(43)-C(46)   | 119.65(9)  |
| C(44)-N(43)-C(46)   | 110.84(9)  |
| O(44)-C(44)-O(45)   | 122.17(10) |
| O(44)-C(44)-N(43)   | 129.46(10) |
| O(45)-C(44)-N(43)   | 108.36(9)  |
| O(45)-C(45)-C(46)   | 105.44(9)  |
| O(45)-C(45)-H(45A)  | 110.7      |
| C(46)-C(45)-H(45A)  | 110.7      |
| O(45)-C(45)-H(45B)  | 110.7      |
| C(46)-C(45)-H(45B)  | 110.7      |
| H(45A)-C(45)-H(45B) | 108.8      |
| C(44)-O(45)-C(45)   | 110.28(9)  |

|                     |            |
|---------------------|------------|
| N(43)-C(46)-C(45)   | 101.44(9)  |
| N(43)-C(46)-H(46A)  | 111.5      |
| C(45)-C(46)-H(46A)  | 111.5      |
| N(43)-C(46)-H(46B)  | 111.5      |
| C(45)-C(46)-H(46B)  | 111.5      |
| H(46A)-C(46)-H(46B) | 109.3      |
| O(47)-C(47)-O(48)   | 124.70(10) |
| O(47)-C(47)-C(33)   | 124.58(10) |
| O(48)-C(47)-C(33)   | 110.63(9)  |
| O(48)-C(48)-C(49)   | 105.85(10) |
| O(48)-C(48)-H(48A)  | 110.6      |
| C(49)-C(48)-H(48A)  | 110.6      |
| O(48)-C(48)-H(48B)  | 110.6      |
| C(49)-C(48)-H(48B)  | 110.6      |
| H(48A)-C(48)-H(48B) | 108.7      |
| C(47)-O(48)-C(48)   | 117.97(9)  |
| C(48)-C(49)-H(49A)  | 109.5      |
| C(48)-C(49)-H(49B)  | 109.5      |
| H(49A)-C(49)-H(49B) | 109.5      |
| C(48)-C(49)-H(49C)  | 109.5      |
| H(49A)-C(49)-H(49C) | 109.5      |
| H(49B)-C(49)-H(49C) | 109.5      |
| C(55)-C(50)-C(51)   | 118.72(10) |
| C(55)-C(50)-C(34)   | 121.20(9)  |
| C(51)-C(50)-C(34)   | 119.95(9)  |
| C(52)-C(51)-C(50)   | 120.81(11) |
| C(52)-C(51)-H(51)   | 119.6      |
| C(50)-C(51)-H(51)   | 119.6      |
| C(53)-C(52)-C(51)   | 119.95(11) |
| C(53)-C(52)-H(52)   | 120.0      |
| C(51)-C(52)-H(52)   | 120.0      |
| C(54)-C(53)-C(52)   | 119.63(11) |
| C(54)-C(53)-H(53)   | 120.2      |
| C(52)-C(53)-H(53)   | 120.2      |
| C(53)-C(54)-C(55)   | 120.53(11) |
| C(53)-C(54)-H(54)   | 119.7      |

|                     |            |
|---------------------|------------|
| C(55)-C(54)-H(54)   | 119.7      |
| C(54)-C(55)-C(50)   | 120.33(10) |
| C(54)-C(55)-H(55)   | 119.8      |
| C(50)-C(55)-H(55)   | 119.8      |
| C(62)-C(61)-H(61A)  | 109.5      |
| C(62)-C(61)-H(61B)  | 109.5      |
| H(61A)-C(61)-H(61B) | 109.5      |
| C(62)-C(61)-H(61C)  | 109.5      |
| H(61A)-C(61)-H(61C) | 109.5      |
| H(61B)-C(61)-H(61C) | 109.5      |
| O(61)-C(62)-O(62)   | 122.8(2)   |
| O(61)-C(62)-C(61)   | 125.4(2)   |
| O(62)-C(62)-C(61)   | 111.8(2)   |
| C(62)-O(62)-C(63)   | 116.9(2)   |
| O(62)-C(63)-C(64)   | 107.6(3)   |
| O(62)-C(63)-H(63A)  | 110.2      |
| C(64)-C(63)-H(63A)  | 110.2      |
| O(62)-C(63)-H(63B)  | 110.2      |
| C(64)-C(63)-H(63B)  | 110.2      |
| H(63A)-C(63)-H(63B) | 108.5      |
| C(63)-C(64)-H(64A)  | 109.5      |
| C(63)-C(64)-H(64B)  | 109.5      |
| H(64A)-C(64)-H(64B) | 109.5      |
| C(63)-C(64)-H(64C)  | 109.5      |
| H(64A)-C(64)-H(64C) | 109.5      |
| H(64B)-C(64)-H(64C) | 109.5      |

---

Symmetry transformations used to generate equivalent atoms:



Table 4. Anisotropic displacement parameters ( $\text{\AA}^2 \times 10^3$ ) for JF3005FMI. The anisotropic displacement factor exponent takes the form:  $-2\pi^2 [ h^2 a^{*2}U^{11} + \dots + 2 h k a^* b^* U^{12} ]$

|       | U <sup>11</sup> | U <sup>22</sup> | U <sup>33</sup> | U <sup>23</sup> | U <sup>13</sup> | U <sup>12</sup> |
|-------|-----------------|-----------------|-----------------|-----------------|-----------------|-----------------|
| C(1)  | 16(1)           | 17(1)           | 20(1)           | -6(1)           | -4(1)           | -1(1)           |
| O(1)  | 17(1)           | 19(1)           | 24(1)           | -9(1)           | -6(1)           | 2(1)            |
| C(2)  | 18(1)           | 16(1)           | 19(1)           | -5(1)           | -4(1)           | -1(1)           |
| O(2)  | 18(1)           | 22(1)           | 22(1)           | -10(1)          | -5(1)           | -1(1)           |
| C(3)  | 17(1)           | 17(1)           | 19(1)           | -5(1)           | -3(1)           | -1(1)           |
| C(4)  | 20(1)           | 16(1)           | 22(1)           | -7(1)           | -4(1)           | -1(1)           |
| C(5)  | 21(1)           | 18(1)           | 27(1)           | -7(1)           | -2(1)           | -3(1)           |
| C(6)  | 19(1)           | 17(1)           | 23(1)           | -5(1)           | -3(1)           | -2(1)           |
| C(7)  | 21(1)           | 22(1)           | 31(1)           | -8(1)           | 2(1)            | -4(1)           |
| C(8)  | 28(1)           | 26(1)           | 45(1)           | -8(1)           | 9(1)            | -9(1)           |
| C(9)  | 36(1)           | 21(1)           | 56(1)           | -6(1)           | 10(1)           | -9(1)           |
| C(10) | 29(1)           | 18(1)           | 46(1)           | -9(1)           | 4(1)            | -4(1)           |
| C(11) | 22(1)           | 18(1)           | 21(1)           | -7(1)           | -2(1)           | 1(1)            |
| C(12) | 21(1)           | 21(1)           | 21(1)           | -9(1)           | -2(1)           | 0(1)            |
| C(13) | 20(1)           | 17(1)           | 18(1)           | -4(1)           | -3(1)           | -1(1)           |
| N(13) | 20(1)           | 17(1)           | 20(1)           | -3(1)           | -4(1)           | -1(1)           |
| O(13) | 23(1)           | 21(1)           | 31(1)           | -4(1)           | -8(1)           | -4(1)           |
| C(14) | 23(1)           | 22(1)           | 17(1)           | -4(1)           | -4(1)           | 0(1)            |
| O(14) | 31(1)           | 26(1)           | 26(1)           | -10(1)          | -10(1)          | -2(1)           |
| C(15) | 25(1)           | 18(1)           | 38(1)           | -2(1)           | -7(1)           | -1(1)           |
| O(15) | 28(1)           | 22(1)           | 26(1)           | -4(1)           | -10(1)          | 2(1)            |
| C(16) | 25(1)           | 16(1)           | 24(1)           | -3(1)           | -3(1)           | -2(1)           |
| C(17) | 20(1)           | 19(1)           | 22(1)           | -7(1)           | -2(1)           | -1(1)           |
| O(17) | 27(1)           | 40(1)           | 21(1)           | -9(1)           | -3(1)           | -1(1)           |
| C(18) | 21(1)           | 36(1)           | 29(1)           | -11(1)          | 3(1)            | -2(1)           |
| O(18) | 17(1)           | 27(1)           | 24(1)           | -8(1)           | -1(1)           | -2(1)           |
| C(19) | 20(1)           | 44(1)           | 42(1)           | -17(1)          | 0(1)            | -4(1)           |
| C(20) | 22(1)           | 14(1)           | 23(1)           | -6(1)           | -4(1)           | 0(1)            |
| C(21) | 26(1)           | 20(1)           | 26(1)           | -10(1)          | -3(1)           | 1(1)            |
| C(22) | 26(1)           | 21(1)           | 38(1)           | -11(1)          | -2(1)           | 3(1)            |
| C(23) | 33(1)           | 24(1)           | 44(1)           | -8(1)           | -15(1)          | 6(1)            |

|       |       |       |       |        |        |       |
|-------|-------|-------|-------|--------|--------|-------|
| C(24) | 42(1) | 28(1) | 31(1) | -8(1)  | -17(1) | 4(1)  |
| C(25) | 33(1) | 21(1) | 24(1) | -9(1)  | -6(1)  | 1(1)  |
| C(31) | 17(1) | 18(1) | 20(1) | -6(1)  | 0(1)   | -4(1) |
| O(31) | 20(1) | 22(1) | 27(1) | -11(1) | 2(1)   | -9(1) |
| C(32) | 19(1) | 16(1) | 18(1) | -4(1)  | -2(1)  | -2(1) |
| O(32) | 18(1) | 23(1) | 21(1) | -10(1) | 1(1)   | -6(1) |
| C(33) | 18(1) | 16(1) | 18(1) | -5(1)  | -3(1)  | -2(1) |
| C(34) | 20(1) | 16(1) | 19(1) | -5(1)  | -2(1)  | -2(1) |
| C(35) | 18(1) | 18(1) | 19(1) | -4(1)  | -1(1)  | -2(1) |
| C(36) | 17(1) | 19(1) | 18(1) | -4(1)  | -1(1)  | -2(1) |
| C(37) | 19(1) | 27(1) | 23(1) | -7(1)  | -4(1)  | -3(1) |
| C(38) | 20(1) | 32(1) | 25(1) | -5(1)  | -5(1)  | 1(1)  |
| C(39) | 24(1) | 23(1) | 27(1) | -2(1)  | -4(1)  | 3(1)  |
| C(40) | 24(1) | 18(1) | 28(1) | -4(1)  | -3(1)  | -1(1) |
| C(41) | 24(1) | 20(1) | 23(1) | -9(1)  | -2(1)  | -6(1) |
| C(42) | 24(1) | 24(1) | 21(1) | -10(1) | -2(1)  | -6(1) |
| C(43) | 23(1) | 17(1) | 18(1) | -4(1)  | -2(1)  | -2(1) |
| N(43) | 22(1) | 16(1) | 22(1) | -2(1)  | -1(1)  | -1(1) |
| O(43) | 24(1) | 21(1) | 28(1) | -5(1)  | 1(1)   | 1(1)  |
| C(44) | 26(1) | 20(1) | 19(1) | -2(1)  | 2(1)   | -3(1) |
| O(44) | 34(1) | 24(1) | 33(1) | -2(1)  | 10(1)  | 2(1)  |
| C(45) | 26(1) | 20(1) | 32(1) | 2(1)   | -4(1)  | -3(1) |
| O(45) | 28(1) | 20(1) | 23(1) | 0(1)   | 1(1)   | -4(1) |
| C(46) | 28(1) | 16(1) | 32(1) | 0(1)   | 1(1)   | 1(1)  |
| C(47) | 22(1) | 18(1) | 21(1) | -7(1)  | -5(1)  | 0(1)  |
| O(47) | 30(1) | 35(1) | 18(1) | -7(1)  | -3(1)  | -4(1) |
| C(48) | 24(1) | 33(1) | 26(1) | -13(1) | -10(1) | 1(1)  |
| O(48) | 20(1) | 31(1) | 23(1) | -12(1) | -6(1)  | 0(1)  |
| C(49) | 24(1) | 40(1) | 38(1) | -8(1)  | -11(1) | -2(1) |
| C(50) | 21(1) | 16(1) | 22(1) | -5(1)  | -3(1)  | -2(1) |
| C(51) | 27(1) | 19(1) | 24(1) | -8(1)  | -4(1)  | -3(1) |
| C(52) | 28(1) | 23(1) | 35(1) | -12(1) | -8(1)  | -4(1) |
| C(53) | 23(1) | 22(1) | 41(1) | -10(1) | -2(1)  | -6(1) |
| C(54) | 25(1) | 22(1) | 29(1) | -6(1)  | 2(1)   | -4(1) |
| C(55) | 23(1) | 19(1) | 22(1) | -6(1)  | -2(1)  | -2(1) |
| C(61) | 27(1) | 33(1) | 34(1) | -11(1) | -3(1)  | 1(1)  |

|       |       |       |       |        |        |       |
|-------|-------|-------|-------|--------|--------|-------|
| O(61) | 27(1) | 42(1) | 35(1) | -16(1) | -1(1)  | -4(1) |
| C(62) | 26(1) | 30(1) | 28(1) | -16(1) | -1(1)  | 0(1)  |
| O(62) | 30(1) | 35(1) | 32(1) | -6(1)  | -1(1)  | -3(1) |
| C(63) | 40(2) | 41(2) | 32(1) | -7(1)  | -8(1)  | 4(1)  |
| C(64) | 95(3) | 33(2) | 36(2) | -14(1) | -19(2) | 0(2)  |

---

Table 5. Hydrogen coordinates ( $\times 10^4$ ) and isotropic displacement parameters ( $\text{\AA}^2 \times 10^{-3}$ ) for JF3005FMI.

|        | x     | y     | z     | U(eq) |
|--------|-------|-------|-------|-------|
| H(2)   | 8003  | 6907  | 396   | 22    |
| H(3)   | 10103 | 6356  | 1515  | 22    |
| H(4)   | 9217  | 5040  | 853   | 23    |
| H(7)   | 5290  | 6219  | 2593  | 31    |
| H(8)   | 4793  | 4554  | 3349  | 43    |
| H(9)   | 6271  | 3175  | 3168  | 49    |
| H(10)  | 8251  | 3472  | 2249  | 39    |
| H(11A) | 5066  | 8445  | 1972  | 25    |
| H(11B) | 6356  | 8985  | 1380  | 25    |
| H(12A) | 7362  | 8304  | 2577  | 25    |
| H(12B) | 6502  | 7326  | 2915  | 25    |
| H(15A) | 6207  | 10872 | -223  | 36    |
| H(15B) | 7068  | 11109 | -1095 | 36    |
| H(16A) | 8989  | 10166 | -537  | 27    |
| H(16B) | 8191  | 10080 | 333   | 27    |
| H(18A) | 13398 | 7042  | -359  | 36    |
| H(18B) | 13322 | 5872  | -223  | 36    |
| H(19A) | 14706 | 6503  | 764   | 53    |
| H(19B) | 15489 | 6012  | 134   | 53    |
| H(19C) | 14601 | 5335  | 924   | 53    |
| H(21)  | 11329 | 3988  | 776   | 29    |
| H(22)  | 13316 | 2933  | 1342  | 35    |
| H(23)  | 13767 | 2717  | 2637  | 42    |
| H(24)  | 12207 | 3529  | 3379  | 41    |
| H(25)  | 10241 | 4594  | 2810  | 31    |
| H(32)  | 1724  | 7805  | 4293  | 22    |
| H(33)  | 4217  | 8263  | 3203  | 21    |
| H(34)  | 2436  | 9515  | 3961  | 22    |
| H(37)  | -206  | 8761  | 2121  | 28    |
| H(38)  | -978  | 10489 | 1457  | 33    |

|        |       |       |      |    |
|--------|-------|-------|------|----|
| H(39)  | 40    | 11744 | 1642 | 33 |
| H(40)  | 1778  | 11265 | 2528 | 30 |
| H(41A) | 414   | 6314  | 2694 | 26 |
| H(41B) | 1650  | 5848  | 3287 | 26 |
| H(42A) | 2931  | 6515  | 2067 | 27 |
| H(42B) | 1753  | 7474  | 1731 | 27 |
| H(45A) | 1502  | 3653  | 5894 | 35 |
| H(45B) | 2182  | 4191  | 6363 | 35 |
| H(46A) | 3747  | 4623  | 5284 | 35 |
| H(46B) | 2753  | 4429  | 4729 | 35 |
| H(48A) | 7084  | 7451  | 5011 | 32 |
| H(48B) | 6376  | 8575  | 4945 | 32 |
| H(49A) | 8520  | 8157  | 3813 | 53 |
| H(49B) | 8736  | 8665  | 4430 | 53 |
| H(49C) | 7776  | 9280  | 3704 | 53 |
| H(51)  | 4079  | 10307 | 4261 | 28 |
| H(52)  | 5968  | 11264 | 3893 | 33 |
| H(53)  | 7098  | 11708 | 2586 | 35 |
| H(54)  | 6301  | 11218 | 1647 | 32 |
| H(55)  | 4436  | 10240 | 2017 | 26 |
| H(61A) | 10446 | 7866  | 6432 | 49 |
| H(61B) | 11224 | 8821  | 6320 | 49 |
| H(61C) | 11632 | 8243  | 5703 | 49 |
| H(63A) | 8459  | 10814 | 4643 | 49 |
| H(63B) | 9225  | 10433 | 3942 | 49 |
| H(64A) | 10015 | 11981 | 4353 | 81 |
| H(64B) | 9487  | 12134 | 3511 | 81 |
| H(64C) | 10986 | 11521 | 3751 | 81 |

---

Table 6. Torsion angles [ $^{\circ}$ ] for JF3005FMI.

---

|                       |             |
|-----------------------|-------------|
| O(2)-C(1)-O(1)-C(11)  | -0.34(10)   |
| C(6)-C(1)-O(1)-C(11)  | 119.12(9)   |
| C(2)-C(1)-O(1)-C(11)  | -117.46(9)  |
| O(1)-C(1)-C(2)-C(13)  | 63.18(10)   |
| O(2)-C(1)-C(2)-C(13)  | -52.87(10)  |
| C(6)-C(1)-C(2)-C(13)  | -174.14(8)  |
| O(1)-C(1)-C(2)-C(3)   | -177.41(8)  |
| O(2)-C(1)-C(2)-C(3)   | 66.54(10)   |
| C(6)-C(1)-C(2)-C(3)   | -54.72(10)  |
| O(1)-C(1)-O(2)-C(12)  | 22.74(10)   |
| C(6)-C(1)-O(2)-C(12)  | -96.26(9)   |
| C(2)-C(1)-O(2)-C(12)  | 142.10(8)   |
| C(13)-C(2)-C(3)-C(17) | -51.99(11)  |
| C(1)-C(2)-C(3)-C(17)  | -170.51(8)  |
| C(13)-C(2)-C(3)-C(4)  | -173.94(8)  |
| C(1)-C(2)-C(3)-C(4)   | 67.54(10)   |
| C(17)-C(3)-C(4)-C(5)  | -168.26(8)  |
| C(2)-C(3)-C(4)-C(5)   | -45.07(11)  |
| C(17)-C(3)-C(4)-C(20) | 66.75(10)   |
| C(2)-C(3)-C(4)-C(20)  | -170.06(8)  |
| C(20)-C(4)-C(5)-C(6)  | 135.37(11)  |
| C(3)-C(4)-C(5)-C(6)   | 12.30(14)   |
| C(20)-C(4)-C(5)-C(10) | -45.17(14)  |
| C(3)-C(4)-C(5)-C(10)  | -168.24(11) |
| C(10)-C(5)-C(6)-C(7)  | 1.79(17)    |
| C(4)-C(5)-C(6)-C(7)   | -178.75(10) |
| C(10)-C(5)-C(6)-C(1)  | 179.10(11)  |
| C(4)-C(5)-C(6)-C(1)   | -1.44(16)   |
| O(1)-C(1)-C(6)-C(5)   | 146.52(10)  |
| O(2)-C(1)-C(6)-C(5)   | -96.73(11)  |
| C(2)-C(1)-C(6)-C(5)   | 22.99(13)   |
| O(1)-C(1)-C(6)-C(7)   | -36.14(13)  |
| O(2)-C(1)-C(6)-C(7)   | 80.62(12)   |
| C(2)-C(1)-C(6)-C(7)   | -159.66(10) |

|                         |             |
|-------------------------|-------------|
| C(5)-C(6)-C(7)-C(8)     | 0.59(18)    |
| C(1)-C(6)-C(7)-C(8)     | -176.79(11) |
| C(6)-C(7)-C(8)-C(9)     | -1.9(2)     |
| C(7)-C(8)-C(9)-C(10)    | 0.7(2)      |
| C(8)-C(9)-C(10)-C(5)    | 1.7(2)      |
| C(6)-C(5)-C(10)-C(9)    | -3.0(2)     |
| C(4)-C(5)-C(10)-C(9)    | 177.55(13)  |
| C(1)-O(1)-C(11)-C(12)   | -20.61(10)  |
| C(1)-O(2)-C(12)-C(11)   | -34.67(10)  |
| O(1)-C(11)-C(12)-O(2)   | 33.42(10)   |
| C(3)-C(2)-C(13)-O(13)   | -20.07(14)  |
| C(1)-C(2)-C(13)-O(13)   | 97.87(11)   |
| C(3)-C(2)-C(13)-N(13)   | 165.32(9)   |
| C(1)-C(2)-C(13)-N(13)   | -76.74(11)  |
| O(13)-C(13)-N(13)-C(14) | 164.46(10)  |
| C(2)-C(13)-N(13)-C(14)  | -20.74(16)  |
| O(13)-C(13)-N(13)-C(16) | -10.91(15)  |
| C(2)-C(13)-N(13)-C(16)  | 163.89(9)   |
| C(13)-N(13)-C(14)-O(14) | -3.16(19)   |
| C(16)-N(13)-C(14)-O(14) | 172.48(11)  |
| C(13)-N(13)-C(14)-O(15) | 177.75(10)  |
| C(16)-N(13)-C(14)-O(15) | -6.60(12)   |
| O(14)-C(14)-O(15)-C(15) | -178.50(11) |
| N(13)-C(14)-O(15)-C(15) | 0.66(12)    |
| C(16)-C(15)-O(15)-C(14) | 5.09(13)    |
| C(13)-N(13)-C(16)-C(15) | -174.70(9)  |
| C(14)-N(13)-C(16)-C(15) | 9.20(12)    |
| O(15)-C(15)-C(16)-N(13) | -8.27(12)   |
| C(2)-C(3)-C(17)-O(17)   | -42.28(14)  |
| C(4)-C(3)-C(17)-O(17)   | 80.24(13)   |
| C(2)-C(3)-C(17)-O(18)   | 140.13(9)   |
| C(4)-C(3)-C(17)-O(18)   | -97.35(10)  |
| O(17)-C(17)-O(18)-C(18) | -3.94(16)   |
| C(3)-C(17)-O(18)-C(18)  | 173.64(9)   |
| C(19)-C(18)-O(18)-C(17) | -171.34(10) |
| C(5)-C(4)-C(20)-C(21)   | 135.63(10)  |

|                         |             |
|-------------------------|-------------|
| C(3)-C(4)-C(20)-C(21)   | -100.15(11) |
| C(5)-C(4)-C(20)-C(25)   | -47.49(13)  |
| C(3)-C(4)-C(20)-C(25)   | 76.73(12)   |
| C(25)-C(20)-C(21)-C(22) | -1.58(17)   |
| C(4)-C(20)-C(21)-C(22)  | 175.35(10)  |
| C(20)-C(21)-C(22)-C(23) | 0.61(18)    |
| C(21)-C(22)-C(23)-C(24) | 0.8(2)      |
| C(22)-C(23)-C(24)-C(25) | -1.1(2)     |
| C(23)-C(24)-C(25)-C(20) | 0.1(2)      |
| C(21)-C(20)-C(25)-C(24) | 1.22(18)    |
| C(4)-C(20)-C(25)-C(24)  | -175.72(11) |
| O(32)-C(31)-O(31)-C(41) | 8.66(10)    |
| C(36)-C(31)-O(31)-C(41) | 127.45(9)   |
| C(32)-C(31)-O(31)-C(41) | -109.52(9)  |
| O(31)-C(31)-C(32)-C(43) | 59.31(10)   |
| O(32)-C(31)-C(32)-C(43) | -57.48(10)  |
| C(36)-C(31)-C(32)-C(43) | -177.53(8)  |
| O(31)-C(31)-C(32)-C(33) | 179.47(8)   |
| O(32)-C(31)-C(32)-C(33) | 62.67(10)   |
| C(36)-C(31)-C(32)-C(33) | -57.37(10)  |
| O(31)-C(31)-O(32)-C(42) | 15.37(10)   |
| C(36)-C(31)-O(32)-C(42) | -104.24(9)  |
| C(32)-C(31)-O(32)-C(42) | 135.06(8)   |
| C(43)-C(32)-C(33)-C(47) | -49.28(11)  |
| C(31)-C(32)-C(33)-C(47) | -169.71(8)  |
| C(43)-C(32)-C(33)-C(34) | -170.02(8)  |
| C(31)-C(32)-C(33)-C(34) | 69.54(10)   |
| C(47)-C(33)-C(34)-C(50) | 60.91(10)   |
| C(32)-C(33)-C(34)-C(50) | -176.07(8)  |
| C(47)-C(33)-C(34)-C(35) | -171.41(8)  |
| C(32)-C(33)-C(34)-C(35) | -48.38(11)  |
| C(50)-C(34)-C(35)-C(36) | 143.12(10)  |
| C(33)-C(34)-C(35)-C(36) | 17.88(13)   |
| C(50)-C(34)-C(35)-C(40) | -40.12(13)  |
| C(33)-C(34)-C(35)-C(40) | -165.36(9)  |
| C(40)-C(35)-C(36)-C(37) | -0.45(15)   |



|                         |             |
|-------------------------|-------------|
| C(34)-C(35)-C(36)-C(37) | 176.31(9)   |
| C(40)-C(35)-C(36)-C(31) | 175.50(9)   |
| C(34)-C(35)-C(36)-C(31) | -7.74(15)   |
| O(31)-C(31)-C(36)-C(37) | -33.14(12)  |
| O(32)-C(31)-C(36)-C(37) | 83.85(11)   |
| C(32)-C(31)-C(36)-C(37) | -156.51(9)  |
| O(31)-C(31)-C(36)-C(35) | 150.88(9)   |
| O(32)-C(31)-C(36)-C(35) | -92.13(11)  |
| C(32)-C(31)-C(36)-C(35) | 27.51(12)   |
| C(35)-C(36)-C(37)-C(38) | 0.16(16)    |
| C(31)-C(36)-C(37)-C(38) | -175.85(10) |
| C(36)-C(37)-C(38)-C(39) | 0.62(17)    |
| C(37)-C(38)-C(39)-C(40) | -1.09(18)   |
| C(38)-C(39)-C(40)-C(35) | 0.80(18)    |
| C(36)-C(35)-C(40)-C(39) | -0.03(16)   |
| C(34)-C(35)-C(40)-C(39) | -176.91(10) |
| C(31)-O(31)-C(41)-C(42) | -27.89(10)  |
| C(31)-O(32)-C(42)-C(41) | -31.74(10)  |
| O(31)-C(41)-C(42)-O(32) | 35.95(10)   |
| C(33)-C(32)-C(43)-O(43) | -31.99(14)  |
| C(31)-C(32)-C(43)-O(43) | 86.33(12)   |
| C(33)-C(32)-C(43)-N(43) | 148.72(9)   |
| C(31)-C(32)-C(43)-N(43) | -92.95(11)  |
| O(43)-C(43)-N(43)-C(44) | 176.28(11)  |
| C(32)-C(43)-N(43)-C(44) | -4.41(17)   |
| O(43)-C(43)-N(43)-C(46) | -4.65(16)   |
| C(32)-C(43)-N(43)-C(46) | 174.66(10)  |
| C(43)-N(43)-C(44)-O(44) | 3.9(2)      |
| C(46)-N(43)-C(44)-O(44) | -175.20(14) |
| C(43)-N(43)-C(44)-O(45) | -176.69(10) |
| C(46)-N(43)-C(44)-O(45) | 4.17(13)    |
| O(44)-C(44)-O(45)-C(45) | -171.88(12) |
| N(43)-C(44)-O(45)-C(45) | 8.70(13)    |
| C(46)-C(45)-O(45)-C(44) | -17.60(14)  |
| C(43)-N(43)-C(46)-C(45) | 166.54(10)  |
| C(44)-N(43)-C(46)-C(45) | -14.23(13)  |

|                         |             |
|-------------------------|-------------|
| O(45)-C(45)-C(46)-N(43) | 18.43(13)   |
| C(32)-C(33)-C(47)-O(47) | -42.27(14)  |
| C(34)-C(33)-C(47)-O(47) | 78.72(13)   |
| C(32)-C(33)-C(47)-O(48) | 140.87(9)   |
| C(34)-C(33)-C(47)-O(48) | -98.14(10)  |
| O(47)-C(47)-O(48)-C(48) | -11.07(16)  |
| C(33)-C(47)-O(48)-C(48) | 165.79(9)   |
| C(49)-C(48)-O(48)-C(47) | -161.02(10) |
| C(35)-C(34)-C(50)-C(55) | -45.90(13)  |
| C(33)-C(34)-C(50)-C(55) | 80.16(12)   |
| C(35)-C(34)-C(50)-C(51) | 138.33(10)  |
| C(33)-C(34)-C(50)-C(51) | -95.61(11)  |
| C(55)-C(50)-C(51)-C(52) | -1.47(16)   |
| C(34)-C(50)-C(51)-C(52) | 174.40(10)  |
| C(50)-C(51)-C(52)-C(53) | 0.66(17)    |
| C(51)-C(52)-C(53)-C(54) | 0.70(18)    |
| C(52)-C(53)-C(54)-C(55) | -1.24(18)   |
| C(53)-C(54)-C(55)-C(50) | 0.42(17)    |
| C(51)-C(50)-C(55)-C(54) | 0.93(16)    |
| C(34)-C(50)-C(55)-C(54) | -174.89(10) |
| O(61)-C(62)-O(62)-C(63) | -2.5(4)     |
| C(61)-C(62)-O(62)-C(63) | 178.8(2)    |
| C(62)-O(62)-C(63)-C(64) | 159.5(3)    |

---

Symmetry transformations used to generate equivalent atoms:

Table 7. Hydrogen bonds for JF3005FMI [ $\text{\AA}$  and  $^\circ$ ].

| D-H...A                | d(D-H) | d(H...A) | d(D...A)   | $\angle(\text{DHA})$ |
|------------------------|--------|----------|------------|----------------------|
| C(2)-H(2)...O(14)      | 1.00   | 2.33     | 2.9721(13) | 121.2                |
| C(11)-H(11A)...O(32)   | 0.99   | 2.55     | 3.3876(13) | 142.4                |
| C(15)-H(15B)...O(32)#1 | 0.99   | 2.58     | 3.5456(15) | 165.0                |
| C(16)-H(16A)...O(13)#2 | 0.99   | 2.52     | 3.1041(14) | 117.8                |
| C(32)-H(32)...O(44)    | 1.00   | 2.28     | 2.9582(13) | 123.6                |
| C(41)-H(41A)...O(2)#3  | 0.99   | 2.61     | 3.3991(13) | 137.0                |
| C(45)-H(45A)...O(31)#4 | 0.99   | 2.65     | 3.3334(14) | 126.1                |
| C(46)-H(46A)...O(43)#5 | 0.99   | 2.35     | 3.2956(15) | 158.7                |
| C(49)-H(49A)...O(31)#6 | 0.98   | 2.61     | 3.5122(17) | 152.4                |
| C(49)-H(49B)...O(61)   | 0.98   | 2.38     | 3.150(2)   | 135.4                |
| C(61)-H(61C)...O(47)#6 | 0.98   | 2.55     | 3.501(3)   | 162.5                |
| C(64)-H(64A)...O(44)#7 | 0.98   | 2.41     | 3.351(3)   | 161.1                |

Symmetry transformations used to generate equivalent atoms:

#1  $-x+1, -y+2, -z$  #2  $-x+2, -y+2, -z$  #3  $x-1, y, z$

#4  $-x, -y+1, -z+1$  #5  $-x+1, -y+1, -z+1$  #6  $x+1, y, z$

#7  $-x+1, -y+2, -z+1$

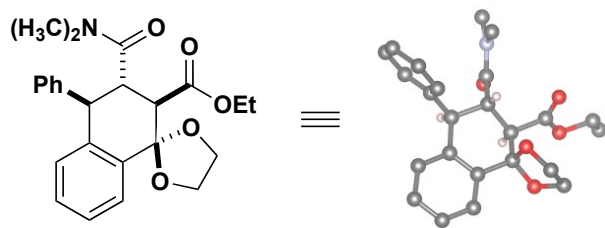

CCDC 2087134

Table 1. Crystal data and structure refinement for  $[\text{C}_{24}\text{H}_{27}\text{NO}_5]$ .

|                     |                                          |
|---------------------|------------------------------------------|
| Identification code | JF3023FMI (JMR-II-14)                    |
| Empirical formula   | $\text{C}_{24}\text{H}_{27}\text{N O}_5$ |
| Formula weight      | 409.46                                   |
| Temperature         | 100(2) K                                 |
| Wavelength          | 0.71073 $\text{\AA}$                     |
| Crystal system      | Monoclinic                               |
| Space group         | $P2_1/c$                                 |

|                                   |                                                                             |                   |
|-----------------------------------|-----------------------------------------------------------------------------|-------------------|
| Unit cell dimensions              | a = 11.2062(10) Å                                                           | ∠ = 90°.          |
|                                   | b = 11.4773(11) Å                                                           | ∠ = 94.0553(18)°. |
|                                   | c = 16.2488(15) Å                                                           | ∠ = 90°.          |
| Volume                            | 2084.6(3) Å <sup>3</sup>                                                    |                   |
| Z                                 | 4                                                                           |                   |
| Density (calculated)              | 1.305 Mg/m <sup>3</sup>                                                     |                   |
| Absorption coefficient            | 0.091 mm <sup>-1</sup>                                                      |                   |
| F(000)                            | 872                                                                         |                   |
| Crystal size                      | 0.539 x 0.352 x 0.200 mm <sup>3</sup>                                       |                   |
| Crystal color and habit           | Colorless Block                                                             |                   |
| Diffractometer                    | Bruker Photon100 CMOS                                                       |                   |
| Theta range for data collection   | 2.174 to 27.499°.                                                           |                   |
| Index ranges                      | -14 ≤ h ≤ 14, -14 ≤ k ≤ 14, -21 ≤ l ≤ 21                                    |                   |
| Reflections collected             | 18508                                                                       |                   |
| Independent reflections           | 4785 [R(int) = 0.0244]                                                      |                   |
| Observed reflections (I > 2σ(I))  | 4254                                                                        |                   |
| Completeness to theta = 25.242°   | 100.0 %                                                                     |                   |
| Absorption correction             | Semi-empirical from equivalents                                             |                   |
| Max. and min. transmission        | 0.9825 and 0.8832                                                           |                   |
| Solution method                   | SHELXT (Sheldrick, 2014)                                                    |                   |
| Refinement method                 | SHELXL-2017/1 (Sheldrick, 2017) Full-matrix least-squares on F <sup>2</sup> |                   |
| Data / restraints / parameters    | 4785 / 0 / 380                                                              |                   |
| Goodness-of-fit on F <sup>2</sup> | 1.047                                                                       |                   |
| Final R indices [I > 2σ(I)]       | R1 = 0.0462, wR2 = 0.1216                                                   |                   |
| R indices (all data)              | R1 = 0.0515, wR2 = 0.1275                                                   |                   |
| Extinction coefficient            | 0.025(2)                                                                    |                   |
| Largest diff. peak and hole       | 0.353 and -0.290 e.Å <sup>-3</sup>                                          |                   |

Table 2. Atomic coordinates ( $\times 10^4$ ) and equivalent isotropic displacement parameters ( $\text{\AA}^2 \times 10^3$ ) for JF3023FMI.  $U(\text{eq})$  is defined as one third of the trace of the orthogonalized  $U^{ij}$  tensor.

|       | x        | y       | z       | $U(\text{eq})$ |
|-------|----------|---------|---------|----------------|
| C(1)  | 6070(1)  | 3119(1) | 3280(1) | 21(1)          |
| O(1)  | 6521(1)  | 1954(1) | 3378(1) | 26(1)          |
| C(2)  | 6193(1)  | 3514(1) | 2385(1) | 20(1)          |
| O(2)  | 4850(1)  | 3086(1) | 3462(1) | 26(1)          |
| C(3)  | 7520(1)  | 3507(1) | 2208(1) | 20(1)          |
| C(4)  | 8232(1)  | 4387(1) | 2772(1) | 21(1)          |
| C(5)  | 7826(1)  | 4442(1) | 3648(1) | 20(1)          |
| C(6)  | 6768(1)  | 3926(1) | 3876(1) | 21(1)          |
| C(7)  | 6387(1)  | 4114(1) | 4664(1) | 27(1)          |
| C(8)  | 7056(1)  | 4788(1) | 5232(1) | 30(1)          |
| C(9)  | 8130(1)  | 5272(1) | 5019(1) | 28(1)          |
| C(10) | 8503(1)  | 5103(1) | 4233(1) | 24(1)          |
| C(11) | 5669(1)  | 1301(1) | 3813(1) | 33(1)          |
| C(12) | 4504(1)  | 1886(1) | 3535(1) | 31(1)          |
| C(13) | 5491(1)  | 2717(1) | 1782(1) | 24(1)          |
| O(13) | 5857(1)  | 1809(1) | 1538(1) | 36(1)          |
| C(14) | 3667(1)  | 2452(1) | 974(1)  | 35(1)          |
| O(14) | 4412(1)  | 3161(1) | 1551(1) | 28(1)          |
| C(15) | 2721(1)  | 3228(1) | 571(1)  | 33(1)          |
| C(16) | 7643(1)  | 3892(1) | 1314(1) | 24(1)          |
| N(16) | 8431(1)  | 3344(1) | 859(1)  | 25(1)          |
| O(16) | 7047(1)  | 4725(1) | 1044(1) | 38(1)          |
| C(17) | 8630(2)  | 3785(2) | 37(1)   | 35(1)          |
| C(18) | 9128(1)  | 2317(1) | 1104(1) | 33(1)          |
| C(19) | 9572(1)  | 4166(1) | 2770(1) | 22(1)          |
| C(20) | 10309(1) | 4946(1) | 2396(1) | 28(1)          |
| C(21) | 11544(1) | 4749(1) | 2403(1) | 34(1)          |
| C(22) | 12036(1) | 3761(2) | 2768(1) | 33(1)          |
| C(23) | 11305(1) | 2962(1) | 3137(1) | 30(1)          |
| C(24) | 10079(1) | 3171(1) | 3141(1) | 25(1)          |

Table 3. Bond lengths [Å] and angles [°] for JF3023FMI.

---

|              |            |
|--------------|------------|
| C(1)-O(2)    | 1.4199(14) |
| C(1)-O(1)    | 1.4349(15) |
| C(1)-C(6)    | 1.5170(17) |
| C(1)-C(2)    | 1.5377(18) |
| O(1)-C(11)   | 1.4372(17) |
| C(2)-C(13)   | 1.5182(17) |
| C(2)-C(3)    | 1.5350(16) |
| C(2)-H(2)    | 0.952(17)  |
| O(2)-C(12)   | 1.4371(17) |
| C(3)-C(16)   | 1.5339(18) |
| C(3)-C(4)    | 1.5471(17) |
| C(3)-H(3)    | 0.956(16)  |
| C(4)-C(19)   | 1.5227(16) |
| C(4)-C(5)    | 1.5252(17) |
| C(4)-H(4)    | 0.962(16)  |
| C(5)-C(10)   | 1.3979(18) |
| C(5)-C(6)    | 1.3979(17) |
| C(6)-C(7)    | 1.3951(19) |
| C(7)-C(8)    | 1.384(2)   |
| C(7)-H(7)    | 0.950(18)  |
| C(8)-C(9)    | 1.391(2)   |
| C(8)-H(8)    | 0.994(19)  |
| C(9)-C(10)   | 1.386(2)   |
| C(9)-H(9)    | 0.974(19)  |
| C(10)-H(10)  | 0.952(17)  |
| C(11)-C(12)  | 1.509(2)   |
| C(11)-H(11A) | 1.010(19)  |
| C(11)-H(11B) | 0.965(19)  |
| C(12)-H(12A) | 0.986(17)  |
| C(12)-H(12B) | 0.943(19)  |
| C(13)-O(13)  | 1.1980(17) |
| C(13)-O(14)  | 1.3408(15) |
| C(14)-O(14)  | 1.4586(17) |
| C(14)-C(15)  | 1.499(2)   |

|              |            |
|--------------|------------|
| C(14)-H(14A) | 0.96(2)    |
| C(14)-H(14B) | 0.99(2)    |
| C(15)-H(15A) | 1.04(2)    |
| C(15)-H(15B) | 1.03(2)    |
| C(15)-H(15C) | 1.00(2)    |
| C(16)-O(16)  | 1.2298(17) |
| C(16)-N(16)  | 1.3464(17) |
| N(16)-C(18)  | 1.4535(18) |
| N(16)-C(17)  | 1.4607(18) |
| C(17)-H(17A) | 1.02(2)    |
| C(17)-H(17B) | 1.001(18)  |
| C(17)-H(17C) | 0.96(3)    |
| C(18)-H(18A) | 0.99(2)    |
| C(18)-H(18B) | 0.99(2)    |
| C(18)-H(18C) | 0.95(2)    |
| C(19)-C(20)  | 1.3878(19) |
| C(19)-C(24)  | 1.3937(19) |
| C(20)-C(21)  | 1.4011(19) |
| C(20)-H(20)  | 0.966(17)  |
| C(21)-C(22)  | 1.377(2)   |
| C(21)-H(21)  | 0.95(2)    |
| C(22)-C(23)  | 1.393(2)   |
| C(22)-H(22)  | 0.96(2)    |
| C(23)-C(24)  | 1.3955(18) |
| C(23)-H(23)  | 0.99(2)    |
| C(24)-H(24)  | 1.010(17)  |

|                 |            |
|-----------------|------------|
| O(2)-C(1)-O(1)  | 106.76(9)  |
| O(2)-C(1)-C(6)  | 110.16(10) |
| O(1)-C(1)-C(6)  | 109.63(10) |
| O(2)-C(1)-C(2)  | 110.92(10) |
| O(1)-C(1)-C(2)  | 108.99(10) |
| C(6)-C(1)-C(2)  | 110.31(10) |
| C(1)-O(1)-C(11) | 107.46(10) |
| C(13)-C(2)-C(3) | 109.89(10) |
| C(13)-C(2)-C(1) | 110.84(10) |

|                  |            |
|------------------|------------|
| C(3)-C(2)-C(1)   | 109.23(10) |
| C(13)-C(2)-H(2)  | 108.5(10)  |
| C(3)-C(2)-H(2)   | 111.6(10)  |
| C(1)-C(2)-H(2)   | 106.7(10)  |
| C(1)-O(2)-C(12)  | 108.17(10) |
| C(16)-C(3)-C(2)  | 109.23(10) |
| C(16)-C(3)-C(4)  | 107.25(10) |
| C(2)-C(3)-C(4)   | 110.56(10) |
| C(16)-C(3)-H(3)  | 112.8(9)   |
| C(2)-C(3)-H(3)   | 107.3(9)   |
| C(4)-C(3)-H(3)   | 109.7(9)   |
| C(19)-C(4)-C(5)  | 111.65(10) |
| C(19)-C(4)-C(3)  | 110.91(10) |
| C(5)-C(4)-C(3)   | 113.85(10) |
| C(19)-C(4)-H(4)  | 105.3(9)   |
| C(5)-C(4)-H(4)   | 107.2(9)   |
| C(3)-C(4)-H(4)   | 107.4(9)   |
| C(10)-C(5)-C(6)  | 118.62(12) |
| C(10)-C(5)-C(4)  | 118.24(11) |
| C(6)-C(5)-C(4)   | 123.00(11) |
| C(7)-C(6)-C(5)   | 119.91(12) |
| C(7)-C(6)-C(1)   | 120.18(11) |
| C(5)-C(6)-C(1)   | 119.85(11) |
| C(8)-C(7)-C(6)   | 120.79(12) |
| C(8)-C(7)-H(7)   | 120.7(11)  |
| C(6)-C(7)-H(7)   | 118.5(11)  |
| C(7)-C(8)-C(9)   | 119.68(13) |
| C(7)-C(8)-H(8)   | 117.4(11)  |
| C(9)-C(8)-H(8)   | 122.9(11)  |
| C(10)-C(9)-C(8)  | 119.70(13) |
| C(10)-C(9)-H(9)  | 121.8(10)  |
| C(8)-C(9)-H(9)   | 118.5(10)  |
| C(9)-C(10)-C(5)  | 121.25(12) |
| C(9)-C(10)-H(10) | 119.8(10)  |
| C(5)-C(10)-H(10) | 119.0(10)  |
| O(1)-C(11)-C(12) | 102.18(11) |



|                     |            |
|---------------------|------------|
| O(1)-C(11)-H(11A)   | 110.5(11)  |
| C(12)-C(11)-H(11A)  | 109.1(11)  |
| O(1)-C(11)-H(11B)   | 108.0(11)  |
| C(12)-C(11)-H(11B)  | 112.4(11)  |
| H(11A)-C(11)-H(11B) | 114.0(15)  |
| O(2)-C(12)-C(11)    | 102.64(11) |
| O(2)-C(12)-H(12A)   | 112.8(10)  |
| C(11)-C(12)-H(12A)  | 110.3(10)  |
| O(2)-C(12)-H(12B)   | 108.6(11)  |
| C(11)-C(12)-H(12B)  | 114.8(11)  |
| H(12A)-C(12)-H(12B) | 107.7(15)  |
| O(13)-C(13)-O(14)   | 124.09(12) |
| O(13)-C(13)-C(2)    | 124.32(12) |
| O(14)-C(13)-C(2)    | 111.59(11) |
| O(14)-C(14)-C(15)   | 107.72(12) |
| O(14)-C(14)-H(14A)  | 107.7(13)  |
| C(15)-C(14)-H(14A)  | 112.8(13)  |
| O(14)-C(14)-H(14B)  | 108.3(12)  |
| C(15)-C(14)-H(14B)  | 112.8(12)  |
| H(14A)-C(14)-H(14B) | 107.3(18)  |
| C(13)-O(14)-C(14)   | 115.61(11) |
| C(14)-C(15)-H(15A)  | 110.5(12)  |
| C(14)-C(15)-H(15B)  | 106.7(12)  |
| H(15A)-C(15)-H(15B) | 110.4(16)  |
| C(14)-C(15)-H(15C)  | 109.1(12)  |
| H(15A)-C(15)-H(15C) | 111.2(17)  |
| H(15B)-C(15)-H(15C) | 108.9(17)  |
| O(16)-C(16)-N(16)   | 121.91(12) |
| O(16)-C(16)-C(3)    | 118.59(11) |
| N(16)-C(16)-C(3)    | 119.44(11) |
| C(16)-N(16)-C(18)   | 126.04(12) |
| C(16)-N(16)-C(17)   | 119.28(12) |
| C(18)-N(16)-C(17)   | 114.68(11) |
| N(16)-C(17)-H(17A)  | 111.4(12)  |
| N(16)-C(17)-H(17B)  | 107.4(10)  |
| H(17A)-C(17)-H(17B) | 107.6(16)  |

|                     |            |
|---------------------|------------|
| N(16)-C(17)-H(17C)  | 110.9(15)  |
| H(17A)-C(17)-H(17C) | 113.1(19)  |
| H(17B)-C(17)-H(17C) | 106.2(18)  |
| N(16)-C(18)-H(18A)  | 111.5(14)  |
| N(16)-C(18)-H(18B)  | 107.6(11)  |
| H(18A)-C(18)-H(18B) | 107.5(17)  |
| N(16)-C(18)-H(18C)  | 110.6(12)  |
| H(18A)-C(18)-H(18C) | 111.3(19)  |
| H(18B)-C(18)-H(18C) | 108.2(17)  |
| C(20)-C(19)-C(24)   | 118.81(12) |
| C(20)-C(19)-C(4)    | 120.74(12) |
| C(24)-C(19)-C(4)    | 120.45(11) |
| C(19)-C(20)-C(21)   | 120.67(14) |
| C(19)-C(20)-H(20)   | 119.9(10)  |
| C(21)-C(20)-H(20)   | 119.4(10)  |
| C(22)-C(21)-C(20)   | 120.13(14) |
| C(22)-C(21)-H(21)   | 121.9(12)  |
| C(20)-C(21)-H(21)   | 118.0(12)  |
| C(21)-C(22)-C(23)   | 119.82(13) |
| C(21)-C(22)-H(22)   | 119.9(12)  |
| C(23)-C(22)-H(22)   | 120.2(12)  |
| C(22)-C(23)-C(24)   | 119.93(14) |
| C(22)-C(23)-H(23)   | 120.8(11)  |
| C(24)-C(23)-H(23)   | 119.3(11)  |
| C(19)-C(24)-C(23)   | 120.62(13) |
| C(19)-C(24)-H(24)   | 118.6(9)   |
| C(23)-C(24)-H(24)   | 120.7(10)  |

---

Symmetry transformations used to generate equivalent atoms:

Table 4. Anisotropic displacement parameters ( $\text{\AA}^2 \times 10^3$ ) for JF3023FMI. The anisotropic displacement factor exponent takes the form:  $-2\pi^2 [ h^2 a^{*2}U^{11} + \dots + 2 h k a^* b^* U^{12} ]$

|       | U <sup>11</sup> | U <sup>22</sup> | U <sup>33</sup> | U <sup>23</sup> | U <sup>13</sup> | U <sup>12</sup> |
|-------|-----------------|-----------------|-----------------|-----------------|-----------------|-----------------|
| C(1)  | 16(1)           | 22(1)           | 26(1)           | 0(1)            | 2(1)            | 0(1)            |
| O(1)  | 23(1)           | 21(1)           | 32(1)           | 3(1)            | 2(1)            | 0(1)            |
| C(2)  | 16(1)           | 21(1)           | 24(1)           | -1(1)           | 0(1)            | 1(1)            |
| O(2)  | 16(1)           | 27(1)           | 34(1)           | 0(1)            | 4(1)            | -3(1)           |
| C(3)  | 17(1)           | 22(1)           | 22(1)           | 0(1)            | 1(1)            | 2(1)            |
| C(4)  | 17(1)           | 21(1)           | 24(1)           | 0(1)            | 2(1)            | 0(1)            |
| C(5)  | 17(1)           | 21(1)           | 23(1)           | 0(1)            | 2(1)            | 3(1)            |
| C(6)  | 17(1)           | 22(1)           | 24(1)           | 1(1)            | 0(1)            | 2(1)            |
| C(7)  | 23(1)           | 31(1)           | 28(1)           | 0(1)            | 5(1)            | -2(1)           |
| C(8)  | 31(1)           | 35(1)           | 23(1)           | -2(1)           | 3(1)            | 1(1)            |
| C(9)  | 26(1)           | 29(1)           | 27(1)           | -5(1)           | -4(1)           | 1(1)            |
| C(10) | 19(1)           | 26(1)           | 28(1)           | -2(1)           | 0(1)            | -1(1)           |
| C(11) | 29(1)           | 29(1)           | 40(1)           | 8(1)            | 2(1)            | -5(1)           |
| C(12) | 25(1)           | 30(1)           | 40(1)           | 5(1)            | 2(1)            | -8(1)           |
| C(13) | 19(1)           | 27(1)           | 26(1)           | -1(1)           | 0(1)            | -1(1)           |
| O(13) | 30(1)           | 34(1)           | 44(1)           | -14(1)          | -7(1)           | 7(1)            |
| C(14) | 30(1)           | 30(1)           | 44(1)           | -6(1)           | -14(1)          | -2(1)           |
| O(14) | 20(1)           | 27(1)           | 35(1)           | -5(1)           | -6(1)           | 0(1)            |
| C(15) | 29(1)           | 38(1)           | 31(1)           | -2(1)           | -4(1)           | 2(1)            |
| C(16) | 21(1)           | 28(1)           | 24(1)           | -1(1)           | 1(1)            | 1(1)            |
| N(16) | 22(1)           | 29(1)           | 24(1)           | -1(1)           | 3(1)            | 2(1)            |
| O(16) | 42(1)           | 43(1)           | 30(1)           | 10(1)           | 8(1)            | 20(1)           |
| C(17) | 35(1)           | 44(1)           | 27(1)           | 2(1)            | 8(1)            | 8(1)            |
| C(18) | 34(1)           | 33(1)           | 32(1)           | -2(1)           | 4(1)            | 11(1)           |
| C(19) | 18(1)           | 25(1)           | 24(1)           | -5(1)           | 2(1)            | -1(1)           |
| C(20) | 24(1)           | 27(1)           | 34(1)           | -4(1)           | 8(1)            | -3(1)           |
| C(21) | 24(1)           | 38(1)           | 42(1)           | -9(1)           | 13(1)           | -9(1)           |
| C(22) | 16(1)           | 48(1)           | 35(1)           | -15(1)          | 3(1)            | 0(1)            |
| C(23) | 22(1)           | 38(1)           | 29(1)           | -8(1)           | -2(1)           | 6(1)            |
| C(24) | 20(1)           | 30(1)           | 25(1)           | -2(1)           | 1(1)            | 1(1)            |

Table 5. Hydrogen coordinates ( $\times 10^4$ ) and isotropic displacement parameters ( $\text{\AA}^2 \times 10^{-3}$ ) for JF3023FMI.

|        | x         | y        | z        | U(eq) |
|--------|-----------|----------|----------|-------|
| H(2)   | 5860(14)  | 4276(15) | 2337(10) | 25(4) |
| H(3)   | 7816(13)  | 2736(14) | 2316(9)  | 18(3) |
| H(4)   | 8109(14)  | 5147(14) | 2533(9)  | 20(4) |
| H(7)   | 5647(16)  | 3786(16) | 4798(11) | 32(4) |
| H(8)   | 6753(16)  | 4876(16) | 5789(12) | 37(5) |
| H(9)   | 8586(16)  | 5748(16) | 5426(11) | 34(4) |
| H(10)  | 9224(15)  | 5456(15) | 4080(10) | 29(4) |
| H(11A) | 5824(16)  | 1407(17) | 4428(12) | 37(5) |
| H(11B) | 5699(16)  | 501(17)  | 3634(11) | 35(4) |
| H(12A) | 4177(15)  | 1551(15) | 3007(11) | 27(4) |
| H(12B) | 3905(17)  | 1837(16) | 3912(12) | 35(5) |
| H(14A) | 3343(19)  | 1828(19) | 1280(13) | 48(6) |
| H(14B) | 4188(19)  | 2099(18) | 574(13)  | 47(5) |
| H(15A) | 2195(19)  | 3577(19) | 1008(13) | 51(6) |
| H(15B) | 2210(18)  | 2716(18) | 158(13)  | 49(5) |
| H(15C) | 3113(19)  | 3854(19) | 260(13)  | 51(6) |
| H(17A) | 8294(19)  | 3232(19) | -411(13) | 49(6) |
| H(17B) | 9516(16)  | 3830(16) | -6(11)   | 34(5) |
| H(17C) | 8330(20)  | 4570(20) | -33(15)  | 66(7) |
| H(18A) | 9920(20)  | 2530(20) | 1367(14) | 62(7) |
| H(18B) | 9263(18)  | 1869(17) | 596(13)  | 43(5) |
| H(18C) | 8699(19)  | 1837(18) | 1455(13) | 45(5) |
| H(20)  | 9974(15)  | 5644(15) | 2140(10) | 26(4) |
| H(21)  | 12018(18) | 5313(18) | 2148(12) | 43(5) |
| H(22)  | 12886(19) | 3631(18) | 2776(12) | 45(5) |
| H(23)  | 11649(17) | 2254(17) | 3413(12) | 38(5) |
| H(24)  | 9542(15)  | 2610(15) | 3421(10) | 28(4) |

Table 6. Torsion angles [°] for JF3023FMI.

---

|                       |             |
|-----------------------|-------------|
| O(2)-C(1)-O(1)-C(11)  | -14.21(14)  |
| C(6)-C(1)-O(1)-C(11)  | 105.10(12)  |
| C(2)-C(1)-O(1)-C(11)  | -134.08(11) |
| O(2)-C(1)-C(2)-C(13)  | -57.31(13)  |
| O(1)-C(1)-C(2)-C(13)  | 59.95(12)   |
| C(6)-C(1)-C(2)-C(13)  | -179.64(10) |
| O(2)-C(1)-C(2)-C(3)   | -178.53(10) |
| O(1)-C(1)-C(2)-C(3)   | -61.27(12)  |
| C(6)-C(1)-C(2)-C(3)   | 59.13(13)   |
| O(1)-C(1)-O(2)-C(12)  | -9.46(14)   |
| C(6)-C(1)-O(2)-C(12)  | -128.43(11) |
| C(2)-C(1)-O(2)-C(12)  | 109.15(12)  |
| C(13)-C(2)-C(3)-C(16) | 57.79(13)   |
| C(1)-C(2)-C(3)-C(16)  | 179.59(10)  |
| C(13)-C(2)-C(3)-C(4)  | 175.59(10)  |
| C(1)-C(2)-C(3)-C(4)   | -62.61(13)  |
| C(16)-C(3)-C(4)-C(19) | -76.07(12)  |
| C(2)-C(3)-C(4)-C(19)  | 164.93(10)  |
| C(16)-C(3)-C(4)-C(5)  | 157.01(10)  |
| C(2)-C(3)-C(4)-C(5)   | 38.01(14)   |
| C(19)-C(4)-C(5)-C(10) | 45.88(15)   |
| C(3)-C(4)-C(5)-C(10)  | 172.41(11)  |
| C(19)-C(4)-C(5)-C(6)  | -138.49(12) |
| C(3)-C(4)-C(5)-C(6)   | -11.95(16)  |
| C(10)-C(5)-C(6)-C(7)  | 2.40(18)    |
| C(4)-C(5)-C(6)-C(7)   | -173.21(12) |
| C(10)-C(5)-C(6)-C(1)  | -174.78(11) |
| C(4)-C(5)-C(6)-C(1)   | 9.60(18)    |
| O(2)-C(1)-C(6)-C(7)   | 27.11(16)   |
| O(1)-C(1)-C(6)-C(7)   | -90.09(14)  |
| C(2)-C(1)-C(6)-C(7)   | 149.89(12)  |
| O(2)-C(1)-C(6)-C(5)   | -155.71(11) |
| O(1)-C(1)-C(6)-C(5)   | 87.09(14)   |
| C(2)-C(1)-C(6)-C(5)   | -32.93(15)  |

|                         |             |
|-------------------------|-------------|
| C(5)-C(6)-C(7)-C(8)     | -1.3(2)     |
| C(1)-C(6)-C(7)-C(8)     | 175.85(13)  |
| C(6)-C(7)-C(8)-C(9)     | -0.8(2)     |
| C(7)-C(8)-C(9)-C(10)    | 1.9(2)      |
| C(8)-C(9)-C(10)-C(5)    | -0.7(2)     |
| C(6)-C(5)-C(10)-C(9)    | -1.39(19)   |
| C(4)-C(5)-C(10)-C(9)    | 174.44(12)  |
| C(1)-O(1)-C(11)-C(12)   | 30.65(14)   |
| C(1)-O(2)-C(12)-C(11)   | 27.88(15)   |
| O(1)-C(11)-C(12)-O(2)   | -35.35(15)  |
| C(3)-C(2)-C(13)-O(13)   | 37.35(18)   |
| C(1)-C(2)-C(13)-O(13)   | -83.48(16)  |
| C(3)-C(2)-C(13)-O(14)   | -142.17(11) |
| C(1)-C(2)-C(13)-O(14)   | 97.00(12)   |
| O(13)-C(13)-O(14)-C(14) | 0.8(2)      |
| C(2)-C(13)-O(14)-C(14)  | -179.65(12) |
| C(15)-C(14)-O(14)-C(13) | -160.98(13) |
| C(2)-C(3)-C(16)-O(16)   | 43.26(16)   |
| C(4)-C(3)-C(16)-O(16)   | -76.59(15)  |
| C(2)-C(3)-C(16)-N(16)   | -139.52(12) |
| C(4)-C(3)-C(16)-N(16)   | 100.63(13)  |
| O(16)-C(16)-N(16)-C(18) | -176.50(14) |
| C(3)-C(16)-N(16)-C(18)  | 6.4(2)      |
| O(16)-C(16)-N(16)-C(17) | 3.1(2)      |
| C(3)-C(16)-N(16)-C(17)  | -174.04(12) |
| C(5)-C(4)-C(19)-C(20)   | -121.68(13) |
| C(3)-C(4)-C(19)-C(20)   | 110.19(14)  |
| C(5)-C(4)-C(19)-C(24)   | 58.60(15)   |
| C(3)-C(4)-C(19)-C(24)   | -69.52(15)  |
| C(24)-C(19)-C(20)-C(21) | -1.1(2)     |
| C(4)-C(19)-C(20)-C(21)  | 179.22(13)  |
| C(19)-C(20)-C(21)-C(22) | 1.4(2)      |
| C(20)-C(21)-C(22)-C(23) | -0.6(2)     |
| C(21)-C(22)-C(23)-C(24) | -0.5(2)     |
| C(20)-C(19)-C(24)-C(23) | 0.0(2)      |
| C(4)-C(19)-C(24)-C(23)  | 179.69(12)  |

C(22)-C(23)-C(24)-C(19) 0.8(2)

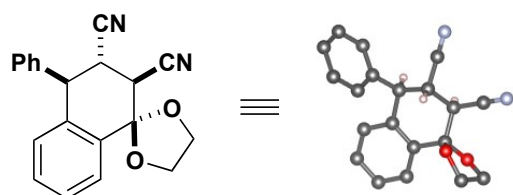

CCDC 2087135

Table 1. Crystal data and structure refinement for [C<sub>20</sub>H<sub>16</sub>N<sub>2</sub>O<sub>2</sub>].

|                                  |                                                                             |                 |
|----------------------------------|-----------------------------------------------------------------------------|-----------------|
| Identification code              | JF3006F2MI                                                                  | (JMR-1-156)     |
| Empirical formula                | C <sub>20</sub> H <sub>16</sub> N <sub>2</sub> O <sub>2</sub>               |                 |
| Formula weight                   | 316.35                                                                      |                 |
| Temperature                      | 100(2) K                                                                    |                 |
| Wavelength                       | 0.71073 Å                                                                   |                 |
| Crystal system                   | Monoclinic                                                                  |                 |
| Space group                      | P2 <sub>1</sub> /n                                                          |                 |
| Unit cell dimensions             | a = 12.6220(11) Å                                                           | ∠ = 90°.        |
|                                  | b = 9.9052(9) Å                                                             | ∠ = 96.220(3)°. |
|                                  | c = 13.1752(11) Å                                                           | ∠ = 90°.        |
| Volume                           | 1637.5(2) Å <sup>3</sup>                                                    |                 |
| Z                                | 4                                                                           |                 |
| Density (calculated)             | 1.283 Mg/m <sup>3</sup>                                                     |                 |
| Absorption coefficient           | 0.084 mm <sup>-1</sup>                                                      |                 |
| F(000)                           | 664                                                                         |                 |
| Crystal size                     | 0.339 x 0.228 x 0.197 mm <sup>3</sup>                                       |                 |
| Crystal color and habit          | Colorless Block                                                             |                 |
| Diffractometer                   | Bruker Photon100 CMOS                                                       |                 |
| Theta range for data collection  | 2.366 to 27.522°.                                                           |                 |
| Index ranges                     | -16 ≤ h ≤ 16, -12 ≤ k ≤ 12, -17 ≤ l ≤ 17                                    |                 |
| Reflections collected            | 14062                                                                       |                 |
| Independent reflections          | 3764 [R(int) = 0.0279]                                                      |                 |
| Observed reflections (I > 2σ(I)) | 3371                                                                        |                 |
| Completeness to theta = 25.242°  | 99.9 %                                                                      |                 |
| Absorption correction            | Semi-empirical from equivalents                                             |                 |
| Max. and min. transmission       | 0.9804 and 0.8651                                                           |                 |
| Solution method                  | SHELXT (Sheldrick, 2014)                                                    |                 |
| Refinement method                | SHELXL-2017/1 (Sheldrick, 2017) Full-matrix least-squares on F <sup>2</sup> |                 |

|                                      |                                       |
|--------------------------------------|---------------------------------------|
| Data / restraints / parameters       | 3764 / 0 / 218                        |
| Goodness-of-fit on $F^2$             | 1.030                                 |
| Final R indices [ $I > 2\sigma(I)$ ] | R1 = 0.0459, wR2 = 0.1176             |
| R indices (all data)                 | R1 = 0.0506, wR2 = 0.1223             |
| Extinction coefficient               | 0.058(4)                              |
| Largest diff. peak and hole          | 0.390 and -0.301 e. $\text{\AA}^{-3}$ |



Table 2. Atomic coordinates ( $\times 10^4$ ) and equivalent isotropic displacement parameters ( $\text{\AA}^2 \times 10^3$ ) for JF3006F2MI.  $U(\text{eq})$  is defined as one third of the trace of the orthogonalized  $U^{ij}$  tensor.

|       | x       | y       | z       | $U(\text{eq})$ |
|-------|---------|---------|---------|----------------|
| C(1)  | 6528(1) | 7185(1) | 5949(1) | 19(1)          |
| O(1)  | 5807(1) | 7010(1) | 5045(1) | 22(1)          |
| C(2)  | 7016(1) | 5794(1) | 6240(1) | 18(1)          |
| O(2)  | 7338(1) | 8080(1) | 5703(1) | 23(1)          |
| C(3)  | 6119(1) | 4872(1) | 6547(1) | 19(1)          |
| C(4)  | 5790(1) | 5373(1) | 7581(1) | 19(1)          |
| C(5)  | 5610(1) | 6900(1) | 7561(1) | 19(1)          |
| C(6)  | 5974(1) | 7748(1) | 6826(1) | 19(1)          |
| C(7)  | 5835(1) | 9145(1) | 6888(1) | 22(1)          |
| C(8)  | 5330(1) | 9702(1) | 7673(1) | 24(1)          |
| C(9)  | 4968(1) | 8865(1) | 8409(1) | 25(1)          |
| C(10) | 5108(1) | 7477(1) | 8351(1) | 23(1)          |
| C(11) | 5985(1) | 8106(1) | 4367(1) | 27(1)          |
| C(12) | 7161(1) | 8388(2) | 4626(1) | 30(1)          |
| C(13) | 7536(1) | 5247(1) | 5384(1) | 22(1)          |
| N(13) | 7943(1) | 4817(1) | 4725(1) | 29(1)          |
| C(14) | 6458(1) | 3446(1) | 6617(1) | 21(1)          |
| N(14) | 6713(1) | 2339(1) | 6660(1) | 27(1)          |
| C(15) | 4828(1) | 4591(1) | 7860(1) | 20(1)          |
| C(16) | 3817(1) | 4849(1) | 7363(1) | 24(1)          |
| C(17) | 2937(1) | 4127(1) | 7613(1) | 28(1)          |
| C(18) | 3067(1) | 3127(2) | 8358(1) | 30(1)          |
| C(19) | 4071(1) | 2850(2) | 8846(1) | 31(1)          |
| C(20) | 4951(1) | 3584(1) | 8601(1) | 26(1)          |

Table 3. Bond lengths [Å] and angles [°] for JF3006F2MI.

---

|              |            |
|--------------|------------|
| C(1)-O(2)    | 1.4176(14) |
| C(1)-O(1)    | 1.4287(15) |
| C(1)-C(6)    | 1.5197(17) |
| C(1)-C(2)    | 1.5406(16) |
| O(1)-C(11)   | 1.4384(15) |
| C(2)-C(13)   | 1.4683(17) |
| C(2)-C(3)    | 1.5428(16) |
| C(2)-H(2)    | 1.0000     |
| O(2)-C(12)   | 1.4445(16) |
| C(3)-C(14)   | 1.4762(17) |
| C(3)-C(4)    | 1.5476(16) |
| C(3)-H(3)    | 1.0000     |
| C(4)-C(15)   | 1.5177(16) |
| C(4)-C(5)    | 1.5292(16) |
| C(4)-H(4)    | 1.0000     |
| C(5)-C(10)   | 1.3975(17) |
| C(5)-C(6)    | 1.3978(17) |
| C(6)-C(7)    | 1.3984(17) |
| C(7)-C(8)    | 1.3874(18) |
| C(7)-H(7)    | 0.9500     |
| C(8)-C(9)    | 1.390(2)   |
| C(8)-H(8)    | 0.9500     |
| C(9)-C(10)   | 1.3886(19) |
| C(9)-H(9)    | 0.9500     |
| C(10)-H(10)  | 0.9500     |
| C(11)-C(12)  | 1.512(2)   |
| C(11)-H(11A) | 0.9900     |
| C(11)-H(11B) | 0.9900     |
| C(12)-H(12A) | 0.9900     |
| C(12)-H(12B) | 0.9900     |
| C(13)-N(13)  | 1.1393(17) |
| C(14)-N(14)  | 1.1416(17) |
| C(15)-C(16)  | 1.3931(18) |
| C(15)-C(20)  | 1.3932(17) |

|             |            |
|-------------|------------|
| C(16)-C(17) | 1.3902(18) |
| C(16)-H(16) | 0.9500     |
| C(17)-C(18) | 1.392(2)   |
| C(17)-H(17) | 0.9500     |
| C(18)-C(19) | 1.385(2)   |
| C(18)-H(18) | 0.9500     |
| C(19)-C(20) | 1.3941(19) |
| C(19)-H(19) | 0.9500     |
| C(20)-H(20) | 0.9500     |

|                 |            |
|-----------------|------------|
| O(2)-C(1)-O(1)  | 107.14(9)  |
| O(2)-C(1)-C(6)  | 110.28(10) |
| O(1)-C(1)-C(6)  | 112.05(10) |
| O(2)-C(1)-C(2)  | 109.71(9)  |
| O(1)-C(1)-C(2)  | 107.49(9)  |
| C(6)-C(1)-C(2)  | 110.08(10) |
| C(1)-O(1)-C(11) | 107.32(9)  |
| C(13)-C(2)-C(1) | 109.81(10) |
| C(13)-C(2)-C(3) | 112.65(10) |
| C(1)-C(2)-C(3)  | 108.05(9)  |
| C(13)-C(2)-H(2) | 108.8      |
| C(1)-C(2)-H(2)  | 108.8      |
| C(3)-C(2)-H(2)  | 108.8      |
| C(1)-O(2)-C(12) | 108.52(9)  |
| C(14)-C(3)-C(2) | 111.50(10) |
| C(14)-C(3)-C(4) | 110.83(10) |
| C(2)-C(3)-C(4)  | 108.39(9)  |
| C(14)-C(3)-H(3) | 108.7      |
| C(2)-C(3)-H(3)  | 108.7      |
| C(4)-C(3)-H(3)  | 108.7      |
| C(15)-C(4)-C(5) | 112.81(10) |
| C(15)-C(4)-C(3) | 110.31(10) |
| C(5)-C(4)-C(3)  | 110.87(10) |
| C(15)-C(4)-H(4) | 107.5      |
| C(5)-C(4)-H(4)  | 107.5      |
| C(3)-C(4)-H(4)  | 107.5      |

|                     |            |
|---------------------|------------|
| C(10)-C(5)-C(6)     | 118.65(11) |
| C(10)-C(5)-C(4)     | 118.11(11) |
| C(6)-C(5)-C(4)      | 123.15(11) |
| C(5)-C(6)-C(7)      | 120.11(11) |
| C(5)-C(6)-C(1)      | 121.28(11) |
| C(7)-C(6)-C(1)      | 118.61(11) |
| C(8)-C(7)-C(6)      | 120.54(12) |
| C(8)-C(7)-H(7)      | 119.7      |
| C(6)-C(7)-H(7)      | 119.7      |
| C(7)-C(8)-C(9)      | 119.63(12) |
| C(7)-C(8)-H(8)      | 120.2      |
| C(9)-C(8)-H(8)      | 120.2      |
| C(10)-C(9)-C(8)     | 119.96(12) |
| C(10)-C(9)-H(9)     | 120.0      |
| C(8)-C(9)-H(9)      | 120.0      |
| C(9)-C(10)-C(5)     | 121.10(12) |
| C(9)-C(10)-H(10)    | 119.4      |
| C(5)-C(10)-H(10)    | 119.4      |
| O(1)-C(11)-C(12)    | 102.39(10) |
| O(1)-C(11)-H(11A)   | 111.3      |
| C(12)-C(11)-H(11A)  | 111.3      |
| O(1)-C(11)-H(11B)   | 111.3      |
| C(12)-C(11)-H(11B)  | 111.3      |
| H(11A)-C(11)-H(11B) | 109.2      |
| O(2)-C(12)-C(11)    | 103.08(10) |
| O(2)-C(12)-H(12A)   | 111.1      |
| C(11)-C(12)-H(12A)  | 111.1      |
| O(2)-C(12)-H(12B)   | 111.1      |
| C(11)-C(12)-H(12B)  | 111.1      |
| H(12A)-C(12)-H(12B) | 109.1      |
| N(13)-C(13)-C(2)    | 179.59(14) |
| N(14)-C(14)-C(3)    | 179.13(14) |
| C(16)-C(15)-C(20)   | 119.20(12) |
| C(16)-C(15)-C(4)    | 120.53(11) |
| C(20)-C(15)-C(4)    | 120.25(11) |
| C(17)-C(16)-C(15)   | 120.59(12) |

|                   |            |
|-------------------|------------|
| C(17)-C(16)-H(16) | 119.7      |
| C(15)-C(16)-H(16) | 119.7      |
| C(16)-C(17)-C(18) | 119.81(13) |
| C(16)-C(17)-H(17) | 120.1      |
| C(18)-C(17)-H(17) | 120.1      |
| C(19)-C(18)-C(17) | 120.01(13) |
| C(19)-C(18)-H(18) | 120.0      |
| C(17)-C(18)-H(18) | 120.0      |
| C(18)-C(19)-C(20) | 120.09(13) |
| C(18)-C(19)-H(19) | 120.0      |
| C(20)-C(19)-H(19) | 120.0      |
| C(15)-C(20)-C(19) | 120.29(13) |
| C(15)-C(20)-H(20) | 119.9      |
| C(19)-C(20)-H(20) | 119.9      |

---

Symmetry transformations used to generate equivalent atoms:

Table 4. Anisotropic displacement parameters ( $\text{\AA}^2 \times 10^3$ ) for JF3006F2MI. The anisotropic displacement factor exponent takes the form:  $-2\pi^2 [ h^2 a^{*2}U^{11} + \dots + 2 h k a^* b^* U^{12} ]$

|       | U <sup>11</sup> | U <sup>22</sup> | U <sup>33</sup> | U <sup>23</sup> | U <sup>13</sup> | U <sup>12</sup> |
|-------|-----------------|-----------------|-----------------|-----------------|-----------------|-----------------|
| C(1)  | 18(1)           | 17(1)           | 21(1)           | 2(1)            | 2(1)            | -1(1)           |
| O(1)  | 22(1)           | 23(1)           | 19(1)           | 3(1)            | -1(1)           | -1(1)           |
| C(2)  | 18(1)           | 18(1)           | 20(1)           | 1(1)            | 2(1)            | 0(1)            |
| O(2)  | 22(1)           | 23(1)           | 24(1)           | 4(1)            | 4(1)            | -4(1)           |
| C(3)  | 19(1)           | 18(1)           | 20(1)           | 1(1)            | 2(1)            | 0(1)            |
| C(4)  | 19(1)           | 18(1)           | 19(1)           | 1(1)            | 3(1)            | 0(1)            |
| C(5)  | 17(1)           | 20(1)           | 20(1)           | -1(1)           | 0(1)            | -1(1)           |
| C(6)  | 16(1)           | 19(1)           | 20(1)           | -1(1)           | 0(1)            | 0(1)            |
| C(7)  | 21(1)           | 19(1)           | 25(1)           | 1(1)            | 0(1)            | 0(1)            |
| C(8)  | 23(1)           | 20(1)           | 30(1)           | -4(1)           | -1(1)           | 2(1)            |
| C(9)  | 21(1)           | 29(1)           | 26(1)           | -7(1)           | 2(1)            | 2(1)            |
| C(10) | 22(1)           | 26(1)           | 23(1)           | -1(1)           | 4(1)            | -2(1)           |
| C(11) | 33(1)           | 24(1)           | 24(1)           | 7(1)            | 0(1)            | 2(1)            |
| C(12) | 34(1)           | 32(1)           | 25(1)           | 8(1)            | 6(1)            | -5(1)           |
| C(13) | 20(1)           | 20(1)           | 25(1)           | 3(1)            | 2(1)            | 2(1)            |
| N(13) | 31(1)           | 28(1)           | 28(1)           | 2(1)            | 9(1)            | 6(1)            |
| C(14) | 21(1)           | 21(1)           | 22(1)           | 1(1)            | 3(1)            | -2(1)           |
| N(14) | 28(1)           | 20(1)           | 32(1)           | 2(1)            | 2(1)            | 0(1)            |
| C(15) | 21(1)           | 20(1)           | 19(1)           | -1(1)           | 4(1)            | -2(1)           |
| C(16) | 23(1)           | 25(1)           | 24(1)           | 2(1)            | 2(1)            | -1(1)           |
| C(17) | 21(1)           | 32(1)           | 29(1)           | -3(1)           | 3(1)            | -3(1)           |
| C(18) | 29(1)           | 32(1)           | 30(1)           | -3(1)           | 10(1)           | -12(1)          |
| C(19) | 36(1)           | 29(1)           | 29(1)           | 7(1)            | 4(1)            | -9(1)           |
| C(20) | 26(1)           | 26(1)           | 25(1)           | 4(1)            | 1(1)            | -4(1)           |

Table 5. Hydrogen coordinates ( $\times 10^4$ ) and isotropic displacement parameters ( $\text{\AA}^2 \times 10^{-3}$ ) for JF3006F2MI.

|        | x    | y     | z    | U(eq) |
|--------|------|-------|------|-------|
| H(2)   | 7563 | 5906  | 6842 | 22    |
| H(3)   | 5491 | 4949  | 6018 | 22    |
| H(4)   | 6395 | 5180  | 8116 | 22    |
| H(7)   | 6088 | 9717  | 6388 | 26    |
| H(8)   | 5231 | 10651 | 7708 | 29    |
| H(9)   | 4626 | 9241  | 8951 | 30    |
| H(10)  | 4858 | 6911  | 8856 | 28    |
| H(11A) | 5549 | 8904  | 4504 | 33    |
| H(11B) | 5822 | 7836  | 3644 | 33    |
| H(12A) | 7597 | 7800  | 4228 | 36    |
| H(12B) | 7329 | 9344  | 4494 | 36    |
| H(16)  | 3729 | 5525  | 6849 | 29    |
| H(17)  | 2249 | 4316  | 7276 | 33    |
| H(18)  | 2467 | 2634  | 8531 | 36    |
| H(19)  | 4160 | 2160  | 9349 | 37    |
| H(20)  | 5638 | 3396  | 8941 | 31    |

Table 6. Torsion angles [°] for JF3006F2MI.

---

|                       |             |
|-----------------------|-------------|
| O(2)-C(1)-O(1)-C(11)  | -18.16(12)  |
| C(6)-C(1)-O(1)-C(11)  | 102.93(11)  |
| C(2)-C(1)-O(1)-C(11)  | -136.01(10) |
| O(2)-C(1)-C(2)-C(13)  | -59.23(12)  |
| O(1)-C(1)-C(2)-C(13)  | 56.94(12)   |
| C(6)-C(1)-C(2)-C(13)  | 179.23(10)  |
| O(2)-C(1)-C(2)-C(3)   | 177.55(9)   |
| O(1)-C(1)-C(2)-C(3)   | -66.28(11)  |
| C(6)-C(1)-C(2)-C(3)   | 56.01(12)   |
| O(1)-C(1)-O(2)-C(12)  | -3.91(13)   |
| C(6)-C(1)-O(2)-C(12)  | -126.11(11) |
| C(2)-C(1)-O(2)-C(12)  | 112.48(11)  |
| C(13)-C(2)-C(3)-C(14) | 45.92(13)   |
| C(1)-C(2)-C(3)-C(14)  | 167.40(10)  |
| C(13)-C(2)-C(3)-C(4)  | 168.19(10)  |
| C(1)-C(2)-C(3)-C(4)   | -70.33(12)  |
| C(14)-C(3)-C(4)-C(15) | -63.40(13)  |
| C(2)-C(3)-C(4)-C(15)  | 173.92(9)   |
| C(14)-C(3)-C(4)-C(5)  | 170.90(10)  |
| C(2)-C(3)-C(4)-C(5)   | 48.23(12)   |
| C(15)-C(4)-C(5)-C(10) | 43.21(15)   |
| C(3)-C(4)-C(5)-C(10)  | 167.50(10)  |
| C(15)-C(4)-C(5)-C(6)  | -140.37(12) |
| C(3)-C(4)-C(5)-C(6)   | -16.09(16)  |
| C(10)-C(5)-C(6)-C(7)  | 0.04(17)    |
| C(4)-C(5)-C(6)-C(7)   | -176.35(11) |
| C(10)-C(5)-C(6)-C(1)  | 179.94(11)  |
| C(4)-C(5)-C(6)-C(1)   | 3.54(17)    |
| O(2)-C(1)-C(6)-C(5)   | -144.73(11) |
| O(1)-C(1)-C(6)-C(5)   | 96.01(13)   |
| C(2)-C(1)-C(6)-C(5)   | -23.54(15)  |
| O(2)-C(1)-C(6)-C(7)   | 35.17(15)   |
| O(1)-C(1)-C(6)-C(7)   | -84.09(13)  |
| C(2)-C(1)-C(6)-C(7)   | 156.36(11)  |



|                         |             |
|-------------------------|-------------|
| C(5)-C(6)-C(7)-C(8)     | -0.41(18)   |
| C(1)-C(6)-C(7)-C(8)     | 179.69(11)  |
| C(6)-C(7)-C(8)-C(9)     | 0.60(19)    |
| C(7)-C(8)-C(9)-C(10)    | -0.43(19)   |
| C(8)-C(9)-C(10)-C(5)    | 0.06(19)    |
| C(6)-C(5)-C(10)-C(9)    | 0.13(18)    |
| C(4)-C(5)-C(10)-C(9)    | 176.71(11)  |
| C(1)-O(1)-C(11)-C(12)   | 31.57(13)   |
| C(1)-O(2)-C(12)-C(11)   | 22.95(13)   |
| O(1)-C(11)-C(12)-O(2)   | -32.89(13)  |
| C(5)-C(4)-C(15)-C(16)   | 49.73(15)   |
| C(3)-C(4)-C(15)-C(16)   | -74.85(14)  |
| C(5)-C(4)-C(15)-C(20)   | -131.68(12) |
| C(3)-C(4)-C(15)-C(20)   | 103.73(13)  |
| C(20)-C(15)-C(16)-C(17) | 0.94(19)    |
| C(4)-C(15)-C(16)-C(17)  | 179.55(12)  |
| C(15)-C(16)-C(17)-C(18) | -0.7(2)     |
| C(16)-C(17)-C(18)-C(19) | -0.2(2)     |
| C(17)-C(18)-C(19)-C(20) | 0.7(2)      |
| C(16)-C(15)-C(20)-C(19) | -0.4(2)     |
| C(4)-C(15)-C(20)-C(19)  | -178.97(12) |
| C(18)-C(19)-C(20)-C(15) | -0.5(2)     |

---

Symmetry transformations used to generate equivalent atoms:

Table 7. Hydrogen bonds for JF3006F2MI [ $\text{\AA}$  and  $^\circ$ ].

---

| D-H...A             | d(D-H) | d(H...A) | d(D...A)   | $\angle$ (DHA) |
|---------------------|--------|----------|------------|----------------|
| C(2)-H(2)...N(14)#1 | 1.00   | 2.52     | 3.4071(17) | 147.6          |

---

Symmetry transformations used to generate equivalent atoms:

#1  $-x+3/2, y+1/2, -z+3/2$

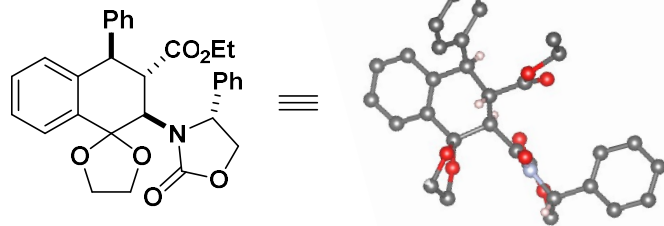

Table 1. Crystal data and structure refinement for  $[C_{31}H_{29}NO_7]$ .

Identification code (EJ-I-26B) JF3084MOFMI Reference Molecule in CCDC : 2145030

|                                  |                                                  |          |
|----------------------------------|--------------------------------------------------|----------|
| Empirical formula                | C <sub>31</sub> H <sub>29</sub> N O <sub>7</sub> |          |
| Formula weight                   | 527.55                                           |          |
| Temperature                      | 90(2) K                                          |          |
| Wavelength                       | 0.71073 Å                                        |          |
| Crystal system                   | Orthorhombic                                     |          |
| Space group                      | P2 <sub>1</sub> 2 <sub>1</sub> 2 <sub>1</sub>    |          |
| Unit cell dimensions             | a = 11.0370(5) Å                                 | a = 90°. |
|                                  | b = 13.7529(7) Å                                 | b = 90°. |
|                                  | c = 17.5560(9) Å                                 | g = 90°. |
| Volume                           | 2664.8(2) Å <sup>3</sup>                         |          |
| Z                                | 4                                                |          |
| Density (calculated)             | 1.315 Mg/m <sup>3</sup>                          |          |
| Absorption coefficient           | 0.093 mm <sup>-1</sup>                           |          |
| F(000)                           | 1112                                             |          |
| Crystal size                     | 0.707 x 0.516 x 0.458 mm <sup>3</sup>            |          |
| Crystal color and habit          | Colorless Block                                  |          |
| Diffractometer                   | Bruker APEX-II CCD                               |          |
| Theta range for data collection  | 2.180 to 30.565°.                                |          |
| Index ranges                     | -15 ≤ h ≤ 10, -19 ≤ k ≤ 19, -23 ≤ l ≤ 25         |          |
| Reflections collected            | 16241                                            |          |
| Independent reflections          | 8163 [R(int) = 0.0156]                           |          |
| Observed reflections (I > 2σ(I)) | 7591                                             |          |
| Completeness to theta = 25.242°  | 99.9 %                                           |          |
| Absorption correction            | Semi-empirical from equivalents                  |          |
| Max. and min. transmission       | 0.9633 and 0.9122                                |          |

Solution method SHELXT (Sheldrick, 2014)

Refinement method SHELXL-2018/3 (Sheldrick, 2018) Full-matrix least-squares on F<sup>2</sup>

Data / restraints / parameters 8163 / 8 / 465

Goodness-of-fit on F<sup>2</sup> 1.023

Final R indices [I > 2σ(I)] R1 = 0.0339, wR2 = 0.0851

R indices (all data) R1 = 0.0374, wR2 = 0.0877

Absolute structure parameter 0.4(2)

Largest diff. peak and hole 0.309 and -0.188 e.Å<sup>-3</sup>

Table 2. Atomic coordinates ( $\times 10^4$ ) and equivalent isotropic displacement parameters ( $\text{\AA}^2 \times 10^3$ ) for JF3084MOFMI.  $U(\text{eq})$  is defined as one third of the trace of the orthogonalized  $U_{ij}$  tensor.

|       | x       | y       | z       | $U(\text{eq})$ |
|-------|---------|---------|---------|----------------|
| C(1)  | 6971(1) | 3069(1) | 3463(1) | 14(1)          |
| C(2)  | 7704(1) | 2141(1) | 3282(1) | 16(1)          |
| O(2)  | 8872(1) | 2184(1) | 3618(1) | 22(1)          |
| C(3)  | 7797(1) | 2007(1) | 2425(1) | 17(1)          |
| O(3)  | 7091(1) | 1326(1) | 3616(1) | 19(1)          |
| C(4)  | 6902(1) | 2372(1) | 1940(1) | 18(1)          |
| C(5)  | 5840(1) | 2985(1) | 2228(1) | 16(1)          |
| C(6)  | 5718(1) | 2930(1) | 3108(1) | 14(1)          |
| C(7)  | 8938(2) | 1455(1) | 4200(1) | 30(1)          |
| C(8)  | 7998(2) | 732(1)  | 3954(1) | 24(1)          |
| C(8B) | 7714(9) | 1020(8) | 4318(6) | 30(2)          |
| C(9)  | 8775(1) | 1481(1) | 2125(1) | 22(1)          |
| C(10) | 8862(2) | 1315(1) | 1347(1) | 26(1)          |
| C(11) | 7983(2) | 1682(1) | 864(1)  | 27(1)          |
| C(12) | 7014(1) | 2210(1) | 1157(1) | 23(1)          |
| C(13) | 6895(1) | 3215(1) | 4315(1) | 16(1)          |
| N(13) | 7828(1) | 3722(1) | 4679(1) | 16(1)          |
| O(13) | 6086(1) | 2873(1) | 4701(1) | 21(1)          |
| C(14) | 8720(1) | 4319(1) | 4358(1) | 17(1)          |
| O(14) | 8808(1) | 4601(1) | 3713(1) | 20(1)          |
| C(15) | 9194(1) | 4081(1) | 5611(1) | 23(1)          |
| O(15) | 9489(1) | 4600(1) | 4911(1) | 22(1)          |
| C(16) | 7854(1) | 3817(1) | 5510(1) | 18(1)          |
| C(17) | 7002(1) | 4602(1) | 5798(1) | 17(1)          |
| C(18) | 6816(2) | 4680(1) | 6583(1) | 26(1)          |
| C(19) | 6070(2) | 5409(2) | 6871(1) | 31(1)          |
| C(20) | 5510(2) | 6062(1) | 6387(1) | 30(1)          |
| C(21) | 5677(2) | 5983(1) | 5607(1) | 26(1)          |
| C(22) | 6424(1) | 5253(1) | 5314(1) | 20(1)          |
| C(23) | 4644(1) | 2708(1) | 1860(1) | 17(1)          |
| C(24) | 4271(1) | 1737(1) | 1859(1) | 20(1)          |

|       |         |         |         |       |
|-------|---------|---------|---------|-------|
| C(25) | 3141(2) | 1471(1) | 1578(1) | 24(1) |
| C(26) | 2372(2) | 2176(1) | 1282(1) | 27(1) |
| C(27) | 2739(2) | 3139(1) | 1268(1) | 28(1) |
| C(28) | 3870(2) | 3407(1) | 1558(1) | 23(1) |
| C(29) | 4841(1) | 3706(1) | 3368(1) | 18(1) |
| O(29) | 5120(1) | 4546(1) | 3470(1) | 28(1) |
| C(30) | 2759(2) | 4087(1) | 3526(1) | 29(1) |
| O(30) | 3715(1) | 3358(1) | 3437(1) | 21(1) |
| C(31) | 1568(2) | 3566(2) | 3418(2) | 38(1) |

---

Table 3. Bond lengths [ $\text{\AA}$ ] and angles [ $^\circ$ ] for JF3084MOFMI.

|              |            |              |            |
|--------------|------------|--------------|------------|
| C(1)-C(13)   | 1.513(2)   | C(11)-H(11)  | 0.98(3)    |
| C(1)-C(6)    | 1.5290(18) | C(12)-H(12)  | 0.97(2)    |
| C(1)-C(2)    | 1.5443(19) | C(13)-O(13)  | 1.2158(18) |
| C(1)-H(1)    | 0.93(2)    | C(13)-N(13)  | 1.3974(18) |
| C(2)-O(2)    | 1.4189(17) | N(13)-C(14)  | 1.4001(18) |
| C(2)-O(3)    | 1.4348(17) | N(13)-C(16)  | 1.4669(18) |
| C(2)-C(3)    | 1.519(2)   | C(14)-O(14)  | 1.2002(19) |
| O(2)-C(7)    | 1.434(2)   | C(14)-O(15)  | 1.3472(18) |
| C(3)-C(4)    | 1.397(2)   | C(15)-O(15)  | 1.458(2)   |
| C(3)-C(9)    | 1.402(2)   | C(15)-C(16)  | 1.532(2)   |
| O(3)-C(8)    | 1.421(2)   | C(15)-H(15A) | 0.96(2)    |
| O(3)-C(8B)   | 1.473(9)   | C(15)-H(15B) | 0.96(2)    |
| C(4)-C(12)   | 1.399(2)   | C(16)-C(17)  | 1.518(2)   |
| C(4)-C(5)    | 1.529(2)   | C(16)-H(16)  | 0.98(2)    |
| C(5)-C(23)   | 1.519(2)   | C(17)-C(22)  | 1.389(2)   |
| C(5)-C(6)    | 1.552(2)   | C(17)-C(18)  | 1.397(2)   |
| C(5)-H(5)    | 0.99(2)    | C(18)-C(19)  | 1.392(3)   |
| C(6)-C(29)   | 1.5115(19) | C(18)-H(18)  | 1.01(3)    |
| C(6)-H(6)    | 0.96(2)    | C(19)-C(20)  | 1.382(3)   |
| C(7)-C(8B)   | 1.491(10)  | C(19)-H(19)  | 0.96(3)    |
| C(7)-C(8)    | 1.501(3)   | C(20)-C(21)  | 1.385(3)   |
| C(7)-H(7A)   | 0.9900     | C(20)-H(20)  | 0.97(3)    |
| C(7)-H(7B)   | 0.9900     | C(21)-C(22)  | 1.397(2)   |
| C(7)-H(7C)   | 0.9900     | C(21)-H(21)  | 0.97(2)    |
| C(7)-H(7D)   | 0.9900     | C(22)-H(22)  | 0.91(2)    |
| C(8)-H(8A)   | 0.9900     | C(23)-C(28)  | 1.392(2)   |
| C(8)-H(8B)   | 0.9900     | C(23)-C(24)  | 1.397(2)   |
| C(8B)-H(8B1) | 0.9900     | C(24)-C(25)  | 1.390(2)   |
| C(8B)-H(8B2) | 0.9900     | C(24)-H(24)  | 0.96(2)    |
| C(9)-C(10)   | 1.389(2)   | C(25)-C(26)  | 1.390(2)   |
| C(9)-H(9)    | 0.98(2)    | C(25)-H(25)  | 0.95(2)    |
| C(10)-C(11)  | 1.384(3)   | C(26)-C(27)  | 1.386(3)   |
| C(10)-H(10)  | 0.93(2)    | C(26)-H(26)  | 0.98(2)    |
| C(11)-C(12)  | 1.391(2)   | C(27)-C(28)  | 1.398(2)   |

|                 |            |                     |            |
|-----------------|------------|---------------------|------------|
| C(27)-H(27)     | 0.98(3)    | C(23)-C(5)-H(5)     | 109.3(11)  |
| C(28)-H(28)     | 0.96(2)    | C(4)-C(5)-H(5)      | 106.2(12)  |
| C(29)-O(29)     | 1.2096(19) | C(6)-C(5)-H(5)      | 107.1(11)  |
| C(29)-O(30)     | 1.3370(18) | C(29)-C(6)-C(1)     | 111.54(11) |
| C(30)-O(30)     | 1.4638(18) | C(29)-C(6)-C(5)     | 108.75(11) |
| C(30)-C(31)     | 1.510(3)   | C(1)-C(6)-C(5)      | 108.70(11) |
| C(30)-H(30A)    | 0.96(3)    | C(29)-C(6)-H(6)     | 109.7(12)  |
| C(30)-H(30B)    | 0.97(3)    | C(1)-C(6)-H(6)      | 109.6(12)  |
| C(31)-H(31A)    | 1.04(3)    | C(5)-C(6)-H(6)      | 108.5(11)  |
| C(31)-H(31B)    | 1.00(3)    | O(2)-C(7)-C(8B)     | 109.4(4)   |
| C(31)-H(31C)    | 0.96(3)    | O(2)-C(7)-C(8)      | 102.82(14) |
|                 |            | O(2)-C(7)-H(7A)     | 111.2      |
| C(13)-C(1)-C(6) | 111.68(11) | C(8)-C(7)-H(7A)     | 111.2      |
| C(13)-C(1)-C(2) | 110.03(11) | O(2)-C(7)-H(7B)     | 111.2      |
| C(6)-C(1)-C(2)  | 106.63(11) | C(8)-C(7)-H(7B)     | 111.2      |
| C(13)-C(1)-H(1) | 111.2(12)  | H(7A)-C(7)-H(7B)    | 109.1      |
| C(6)-C(1)-H(1)  | 110.1(12)  | O(2)-C(7)-H(7C)     | 109.8      |
| C(2)-C(1)-H(1)  | 106.9(12)  | C(8B)-C(7)-H(7C)    | 109.8      |
| O(2)-C(2)-O(3)  | 106.92(11) | O(2)-C(7)-H(7D)     | 109.8      |
| O(2)-C(2)-C(3)  | 110.84(11) | C(8B)-C(7)-H(7D)    | 109.8      |
| O(3)-C(2)-C(3)  | 109.96(11) | H(7C)-C(7)-H(7D)    | 108.2      |
| O(2)-C(2)-C(1)  | 110.84(11) | O(3)-C(8)-C(7)      | 103.11(14) |
| O(3)-C(2)-C(1)  | 108.36(11) | O(3)-C(8)-H(8A)     | 111.1      |
| C(3)-C(2)-C(1)  | 109.84(12) | C(7)-C(8)-H(8A)     | 111.1      |
| C(2)-O(2)-C(7)  | 108.27(12) | O(3)-C(8)-H(8B)     | 111.1      |
| C(4)-C(3)-C(9)  | 120.12(14) | C(7)-C(8)-H(8B)     | 111.1      |
| C(4)-C(3)-C(2)  | 120.78(12) | H(8A)-C(8)-H(8B)    | 109.1      |
| C(9)-C(3)-C(2)  | 119.07(13) | O(3)-C(8B)-C(7)     | 101.1(6)   |
| C(8)-O(3)-C(2)  | 106.71(12) | O(3)-C(8B)-H(8B1)   | 111.5      |
| C(2)-O(3)-C(8B) | 110.2(4)   | C(7)-C(8B)-H(8B1)   | 111.5      |
| C(3)-C(4)-C(12) | 118.59(13) | O(3)-C(8B)-H(8B2)   | 111.5      |
| C(3)-C(4)-C(5)  | 122.60(13) | C(7)-C(8B)-H(8B2)   | 111.5      |
| C(12)-C(4)-C(5) | 118.74(13) | H(8B1)-C(8B)-H(8B2) | 109.4      |
| C(23)-C(5)-C(4) | 112.79(12) | C(10)-C(9)-C(3)     | 120.47(15) |
| C(23)-C(5)-C(6) | 109.57(11) | C(10)-C(9)-H(9)     | 120.8(13)  |
| C(4)-C(5)-C(6)  | 111.60(11) | C(3)-C(9)-H(9)      | 118.7(13)  |

|                     |            |                    |            |
|---------------------|------------|--------------------|------------|
| C(11)-C(10)-C(9)    | 119.63(15) | C(17)-C(18)-H(18)  | 119.0(14)  |
| C(11)-C(10)-H(10)   | 120.4(14)  | C(20)-C(19)-C(18)  | 120.57(16) |
| C(9)-C(10)-H(10)    | 120.0(14)  | C(20)-C(19)-H(19)  | 119.1(16)  |
| C(10)-C(11)-C(12)   | 120.18(15) | C(18)-C(19)-H(19)  | 120.3(16)  |
| C(10)-C(11)-H(11)   | 117.4(14)  | C(19)-C(20)-C(21)  | 119.80(16) |
| C(12)-C(11)-H(11)   | 122.3(15)  | C(19)-C(20)-H(20)  | 118.2(15)  |
| C(11)-C(12)-C(4)    | 121.01(15) | C(21)-C(20)-H(20)  | 122.0(15)  |
| C(11)-C(12)-H(12)   | 118.5(13)  | C(20)-C(21)-C(22)  | 119.95(17) |
| C(4)-C(12)-H(12)    | 120.5(13)  | C(20)-C(21)-H(21)  | 120.9(14)  |
| O(13)-C(13)-N(13)   | 118.64(13) | C(22)-C(21)-H(21)  | 119.1(14)  |
| O(13)-C(13)-C(1)    | 122.79(13) | C(17)-C(22)-C(21)  | 120.52(15) |
| N(13)-C(13)-C(1)    | 118.48(12) | C(17)-C(22)-H(22)  | 123.1(13)  |
| C(13)-N(13)-C(14)   | 128.83(12) | C(21)-C(22)-H(22)  | 116.4(13)  |
| C(13)-N(13)-C(16)   | 120.94(12) | C(28)-C(23)-C(24)  | 118.66(14) |
| C(14)-N(13)-C(16)   | 109.49(11) | C(28)-C(23)-C(5)   | 121.46(13) |
| O(14)-C(14)-O(15)   | 122.40(13) | C(24)-C(23)-C(5)   | 119.79(13) |
| O(14)-C(14)-N(13)   | 128.77(13) | C(25)-C(24)-C(23)  | 121.07(15) |
| O(15)-C(14)-N(13)   | 108.75(13) | C(25)-C(24)-H(24)  | 118.9(13)  |
| O(15)-C(15)-C(16)   | 103.55(12) | C(23)-C(24)-H(24)  | 120.0(13)  |
| O(15)-C(15)-H(15A)  | 107.2(14)  | C(26)-C(25)-C(24)  | 119.83(15) |
| C(16)-C(15)-H(15A)  | 113.3(14)  | C(26)-C(25)-H(25)  | 119.5(14)  |
| O(15)-C(15)-H(15B)  | 107.2(13)  | C(24)-C(25)-H(25)  | 120.6(14)  |
| C(16)-C(15)-H(15B)  | 115.0(13)  | C(27)-C(26)-C(25)  | 119.63(15) |
| H(15A)-C(15)-H(15B) | 109.9(19)  | C(27)-C(26)-H(26)  | 119.9(13)  |
| C(14)-O(15)-C(15)   | 109.07(12) | C(25)-C(26)-H(26)  | 120.5(13)  |
| N(13)-C(16)-C(17)   | 112.45(12) | C(26)-C(27)-C(28)  | 120.51(16) |
| N(13)-C(16)-C(15)   | 98.94(12)  | C(26)-C(27)-H(27)  | 121.0(15)  |
| C(17)-C(16)-C(15)   | 113.05(12) | C(28)-C(27)-H(27)  | 118.5(15)  |
| N(13)-C(16)-H(16)   | 109.3(11)  | C(23)-C(28)-C(27)  | 120.28(15) |
| C(17)-C(16)-H(16)   | 112.0(11)  | C(23)-C(28)-H(28)  | 119.1(14)  |
| C(15)-C(16)-H(16)   | 110.3(11)  | C(27)-C(28)-H(28)  | 120.5(14)  |
| C(22)-C(17)-C(18)   | 119.13(15) | O(29)-C(29)-O(30)  | 124.39(13) |
| C(22)-C(17)-C(16)   | 122.65(13) | O(29)-C(29)-C(6)   | 123.84(14) |
| C(18)-C(17)-C(16)   | 118.20(14) | O(30)-C(29)-C(6)   | 111.71(12) |
| C(19)-C(18)-C(17)   | 120.01(17) | O(30)-C(30)-C(31)  | 106.80(15) |
| C(19)-C(18)-H(18)   | 121.0(14)  | O(30)-C(30)-H(30A) | 105.7(16)  |



|                     |            |                     |           |
|---------------------|------------|---------------------|-----------|
| C(31)-C(30)-H(30A)  | 111.5(16)  | C(30)-C(31)-H(31B)  | 110.2(19) |
| O(30)-C(30)-H(30B)  | 109.7(15)  | H(31A)-C(31)-H(31B) | 111(3)    |
| C(31)-C(30)-H(30B)  | 115.2(15)  | C(30)-C(31)-H(31C)  | 108.4(17) |
| H(30A)-C(30)-H(30B) | 108(2)     | H(31A)-C(31)-H(31C) | 110(2)    |
| C(29)-O(30)-C(30)   | 115.79(12) | H(31B)-C(31)-H(31C) | 107(2)    |
| C(30)-C(31)-H(31A)  | 110(2)     |                     |           |

---

Symmetry transformations used to generate equivalent atoms:

Table 4. Anisotropic displacement parameters ( $\text{\AA}^2 \times 10^3$ ) for JF3084MOFMI. The anisotropic displacement factor exponent takes the form:  $-2p_2[ h^2 a^*2U_{11} + \dots + 2 h k a^* b^* U_{12} ]$

|       | U11   | U22   | U33   | U23    | U13    |
|-------|-------|-------|-------|--------|--------|
| C(1)  | 11(1) | 14(1) | 18(1) | -2(1)  | 0(1)   |
| C(2)  | 10(1) | 17(1) | 22(1) | -2(1)  | -1(1)  |
| O(2)  | 11(1) | 25(1) | 30(1) | -3(1)  | -5(1)  |
| C(3)  | 13(1) | 18(1) | 22(1) | -4(1)  | 2(1)   |
| O(3)  | 16(1) | 16(1) | 25(1) | 2(1)   | -1(1)  |
| C(4)  | 14(1) | 19(1) | 21(1) | -2(1)  | 3(1)   |
| C(5)  | 12(1) | 16(1) | 19(1) | 0(1)   | -1(1)  |
| C(6)  | 10(1) | 14(1) | 19(1) | -2(1)  | -1(1)  |
| C(7)  | 25(1) | 31(1) | 35(1) | 2(1)   | -12(1) |
| C(8)  | 26(1) | 18(1) | 30(1) | 1(1)   | -5(1)  |
| C(8B) | 32(3) | 26(3) | 31(3) | 2(3)   | -6(3)  |
| C(9)  | 16(1) | 21(1) | 30(1) | -5(1)  | 4(1)   |
| C(10) | 20(1) | 25(1) | 34(1) | -8(1)  | 10(1)  |
| C(11) | 24(1) | 33(1) | 25(1) | -8(1)  | 8(1)   |
| C(12) | 20(1) | 29(1) | 21(1) | -2(1)  | 2(1)   |
| C(13) | 13(1) | 14(1) | 21(1) | -2(1)  | -1(1)  |
| N(13) | 14(1) | 16(1) | 17(1) | -1(1)  | -1(1)  |
| O(13) | 18(1) | 22(1) | 22(1) | -2(1)  | 3(1)   |
| C(14) | 10(1) | 16(1) | 24(1) | -3(1)  | 0(1)   |
| O(14) | 15(1) | 22(1) | 22(1) | -1(1)  | 2(1)   |
| C(15) | 18(1) | 27(1) | 24(1) | 0(1)   | -6(1)  |
| O(15) | 14(1) | 26(1) | 26(1) | -2(1)  | -4(1)  |
| C(16) | 18(1) | 19(1) | 17(1) | 1(1)   | -4(1)  |
| C(17) | 15(1) | 19(1) | 18(1) | -2(1)  | 0(1)   |
| C(18) | 24(1) | 37(1) | 17(1) | -1(1)  | -2(1)  |
| C(19) | 28(1) | 46(1) | 21(1) | -13(1) | 5(1)   |
| C(20) | 22(1) | 32(1) | 36(1) | -15(1) | 8(1)   |
| C(21) | 24(1) | 22(1) | 32(1) | -3(1)  | 4(1)   |
| C(22) | 21(1) | 20(1) | 20(1) | -1(1)  | 3(1)   |
| C(23) | 14(1) | 22(1) | 16(1) | 0(1)   | 0(1)   |
| C(24) | 17(1) | 21(1) | 21(1) | -3(1)  | -1(1)  |

|       |       |       |       |       |       |
|-------|-------|-------|-------|-------|-------|
| C(25) | 20(1) | 28(1) | 23(1) | -5(1) | 1(1)  |
| C(26) | 16(1) | 39(1) | 25(1) | 0(1)  | -4(1) |
| C(27) | 18(1) | 35(1) | 31(1) | 7(1)  | -5(1) |
| C(28) | 18(1) | 23(1) | 28(1) | 6(1)  | -2(1) |
| C(29) | 14(1) | 19(1) | 21(1) | -2(1) | 0(1)  |
| O(29) | 22(1) | 17(1) | 46(1) | -6(1) | -1(1) |
| C(30) | 17(1) | 30(1) | 39(1) | -4(1) | 2(1)  |
| O(30) | 11(1) | 23(1) | 29(1) | -3(1) | 1(1)  |
| C(31) | 14(1) | 45(1) | 57(1) | 6(1)  | 4(1)  |

---

Table 5. Hydrogen coordinates ( $\times 10^4$ ) and isotropic displacement parameters ( $\text{\AA}^2 \times 10^3$ ) for JF3084MOFMI.

|        | x        | y        | z        | U(eq) |
|--------|----------|----------|----------|-------|
| H(1)   | 7371(18) | 3585(15) | 3228(11) | 16(4) |
| H(5)   | 6036(18) | 3667(15) | 2099(11) | 18(5) |
| H(6)   | 5410(17) | 2301(15) | 3240(11) | 19(5) |
| H(7A)  | 8742     | 1731     | 4707     | 31(6) |
| H(7B)  | 9753     | 1155     | 4220     | 38(7) |
| H(7C)  | 9227     | 1750     | 4682     | 31(6) |
| H(7D)  | 9519     | 942      | 4048     | 38(7) |
| H(8A)  | 8335     | 265      | 3580     | 25(6) |
| H(8B)  | 7671     | 368      | 4395     | 38(7) |
| H(8B1) | 7756     | 303      | 4359     | 35    |
| H(8B2) | 7314     | 1288     | 4777     | 35    |
| H(9)   | 9390(18) | 1231(16) | 2475(12) | 26(5) |
| H(10)  | 9520(20) | 965(17)  | 1151(13) | 34(6) |
| H(11)  | 8110(20) | 1595(18) | 314(15)  | 39(6) |
| H(12)  | 6430(20) | 2476(16) | 805(12)  | 26(5) |
| H(15A) | 9340(20) | 4520(18) | 6027(13) | 34(6) |
| H(15B) | 9733(19) | 3539(17) | 5645(12) | 26(5) |
| H(16)  | 7684(17) | 3183(14) | 5743(11) | 17(5) |
| H(18)  | 7220(20) | 4194(19) | 6932(14) | 42(7) |
| H(19)  | 5920(20) | 5460(20) | 7411(15) | 44(7) |
| H(20)  | 5020(20) | 6573(19) | 6609(14) | 42(6) |
| H(21)  | 5300(20) | 6442(18) | 5260(13) | 34(6) |
| H(22)  | 6503(18) | 5234(14) | 4796(12) | 19(5) |
| H(24)  | 4791(19) | 1244(15) | 2060(11) | 21(5) |
| H(25)  | 2890(20) | 811(16)  | 1587(12) | 26(5) |
| H(26)  | 1590(20) | 1992(17) | 1065(12) | 32(6) |
| H(27)  | 2220(20) | 3643(18) | 1046(14) | 37(6) |
| H(28)  | 4110(20) | 4075(17) | 1573(13) | 31(6) |
| H(30A) | 2900(20) | 4559(19) | 3131(15) | 41(7) |
| H(30B) | 2850(20) | 4417(19) | 4012(14) | 39(6) |

|        |          |          |          |        |
|--------|----------|----------|----------|--------|
| H(31A) | 1430(30) | 3070(30) | 3856(19) | 76(10) |
| H(31B) | 1550(30) | 3240(20) | 2909(19) | 65(9)  |
| H(31C) | 930(30)  | 4040(20) | 3421(15) | 48(7)  |

---

Table 6. Torsion angles [°] for JF3084MOFMI.

|                       |             |                         |             |
|-----------------------|-------------|-------------------------|-------------|
| C(13)-C(1)-C(2)-O(2)  | -56.22(15)  | C(4)-C(5)-C(6)-C(29)    | 168.02(11)  |
| C(6)-C(1)-C(2)-O(2)   | -177.51(11) | C(23)-C(5)-C(6)-C(1)    | 172.06(11)  |
| C(13)-C(1)-C(2)-O(3)  | 60.81(14)   | C(4)-C(5)-C(6)-C(1)     | 46.40(15)   |
| C(6)-C(1)-C(2)-O(3)   | -60.47(14)  | C(2)-O(2)-C(7)-C(8B)    | -8.1(6)     |
| C(13)-C(1)-C(2)-C(3)  | -179.04(11) | C(2)-O(2)-C(7)-C(8)     | 24.06(17)   |
| C(6)-C(1)-C(2)-C(3)   | 59.67(14)   | C(2)-O(3)-C(8)-C(7)     | 32.03(18)   |
| O(3)-C(2)-O(2)-C(7)   | -4.95(15)   | O(2)-C(7)-C(8)-O(3)     | -34.20(19)  |
| C(3)-C(2)-O(2)-C(7)   | -124.80(14) | C(2)-O(3)-C(8B)-C(7)    | -20.4(8)    |
| C(1)-C(2)-O(2)-C(7)   | 112.97(14)  | O(2)-C(7)-C(8B)-O(3)    | 17.1(8)     |
| O(2)-C(2)-C(3)-C(4)   | -150.42(13) | C(4)-C(3)-C(9)-C(10)    | -0.3(2)     |
| O(3)-C(2)-C(3)-C(4)   | 91.57(15)   | C(2)-C(3)-C(9)-C(10)    | 177.65(14)  |
| C(1)-C(2)-C(3)-C(4)   | -27.60(18)  | C(3)-C(9)-C(10)-C(11)   | 0.8(2)      |
| O(2)-C(2)-C(3)-C(9)   | 31.68(18)   | C(9)-C(10)-C(11)-C(12)  | -0.4(3)     |
| O(3)-C(2)-C(3)-C(9)   | -86.33(15)  | C(10)-C(11)-C(12)-C(4)  | -0.5(3)     |
| C(1)-C(2)-C(3)-C(9)   | 154.50(13)  | C(3)-C(4)-C(12)-C(11)   | 1.0(2)      |
| O(2)-C(2)-O(3)-C(8)   | -17.70(16)  | C(5)-C(4)-C(12)-C(11)   | 178.03(14)  |
| C(3)-C(2)-O(3)-C(8)   | 102.71(14)  | C(6)-C(1)-C(13)-O(13)   | 28.69(19)   |
| C(1)-C(2)-O(3)-C(8)   | -137.22(13) | C(2)-C(1)-C(13)-O(13)   | -89.52(16)  |
| O(2)-C(2)-O(3)-C(8B)  | 16.6(5)     | C(6)-C(1)-C(13)-N(13)   | -154.78(12) |
| C(3)-C(2)-O(3)-C(8B)  | 137.0(5)    | C(2)-C(1)-C(13)-N(13)   | 87.00(15)   |
| C(1)-C(2)-O(3)-C(8B)  | -103.0(5)   | O(13)-C(13)-N(13)-C(14) | -167.32(14) |
| C(9)-C(3)-C(4)-C(12)  | -0.6(2)     | C(1)-C(13)-N(13)-C(14)  | 16.0(2)     |
| C(2)-C(3)-C(4)-C(12)  | -178.51(14) | O(13)-C(13)-N(13)-C(16) | 1.7(2)      |
| C(9)-C(3)-C(4)-C(5)   | -177.51(13) | C(1)-C(13)-N(13)-C(16)  | -174.96(12) |
| C(2)-C(3)-C(4)-C(5)   | 4.6(2)      | C(13)-N(13)-C(14)-O(14) | 8.0(2)      |
| C(3)-C(4)-C(5)-C(23)  | -137.68(14) | C(16)-N(13)-C(14)-O(14) | -162.03(15) |
| C(12)-C(4)-C(5)-C(23) | 45.44(18)   | C(13)-N(13)-C(14)-O(15) | -175.39(13) |
| C(3)-C(4)-C(5)-C(6)   | -13.83(18)  | C(16)-N(13)-C(14)-O(15) | 14.58(16)   |
| C(12)-C(4)-C(5)-C(6)  | 169.30(13)  | O(14)-C(14)-O(15)-C(15) | -176.04(14) |
| C(13)-C(1)-C(6)-C(29) | 49.26(16)   | N(13)-C(14)-O(15)-C(15) | 7.09(16)    |
| C(2)-C(1)-C(6)-C(29)  | 169.49(12)  | C(16)-C(15)-O(15)-C(14) | -24.56(16)  |
| C(13)-C(1)-C(6)-C(5)  | 169.16(11)  | C(13)-N(13)-C(16)-C(17) | -79.32(16)  |
| C(2)-C(1)-C(6)-C(5)   | -70.62(14)  | C(14)-N(13)-C(16)-C(17) | 91.64(14)   |
| C(23)-C(5)-C(6)-C(29) | -66.32(14)  | C(13)-N(13)-C(16)-C(15) | 161.09(12)  |

|                         |             |
|-------------------------|-------------|
| C(14)-N(13)-C(16)-C(15) | -27.96(15)  |
| O(15)-C(15)-C(16)-N(13) | 30.52(14)   |
| O(15)-C(15)-C(16)-C(17) | -88.62(15)  |
| N(13)-C(16)-C(17)-C(22) | -9.9(2)     |
| C(15)-C(16)-C(17)-C(22) | 101.15(17)  |
| N(13)-C(16)-C(17)-C(18) | 171.47(13)  |
| C(15)-C(16)-C(17)-C(18) | -77.52(17)  |
| C(22)-C(17)-C(18)-C(19) | -0.7(2)     |
| C(16)-C(17)-C(18)-C(19) | 178.05(15)  |
| C(17)-C(18)-C(19)-C(20) | -0.2(3)     |
| C(18)-C(19)-C(20)-C(21) | 1.0(3)      |
| C(19)-C(20)-C(21)-C(22) | -1.0(3)     |
| C(18)-C(17)-C(22)-C(21) | 0.7(2)      |
| C(16)-C(17)-C(22)-C(21) | -177.92(14) |
| C(20)-C(21)-C(22)-C(17) | 0.1(2)      |
| C(4)-C(5)-C(23)-C(28)   | -131.65(15) |
| C(6)-C(5)-C(23)-C(28)   | 103.38(16)  |
| C(4)-C(5)-C(23)-C(24)   | 51.84(18)   |
| C(6)-C(5)-C(23)-C(24)   | -73.13(16)  |
| C(28)-C(23)-C(24)-C(25) | -1.5(2)     |
| C(5)-C(23)-C(24)-C(25)  | 175.15(14)  |
| C(23)-C(24)-C(25)-C(26) | 1.0(2)      |
| C(24)-C(25)-C(26)-C(27) | 0.0(3)      |
| C(25)-C(26)-C(27)-C(28) | -0.6(3)     |
| C(24)-C(23)-C(28)-C(27) | 0.9(2)      |
| C(5)-C(23)-C(28)-C(27)  | -175.70(15) |
| C(26)-C(27)-C(28)-C(23) | 0.2(3)      |
| C(1)-C(6)-C(29)-O(29)   | 37.2(2)     |
| C(5)-C(6)-C(29)-O(29)   | -82.64(18)  |
| C(1)-C(6)-C(29)-O(30)   | -145.59(12) |
| C(5)-C(6)-C(29)-O(30)   | 94.54(14)   |
| O(29)-C(29)-O(30)-C(30) | 9.7(2)      |
| C(6)-C(29)-O(30)-C(30)  | -167.48(13) |
| C(31)-C(30)-O(30)-C(29) | 167.68(16)  |

---

Symmetry transformations used to generate equivalent atoms:



Table 7. Hydrogen bonds for JF3084MOFMI [ $\text{\AA}$  and  $^\circ$ ].

| D-H...A                                            | d(D-H)  | d(H...A) | d(D...A)   | $\angle(\text{DHA})$ |
|----------------------------------------------------|---------|----------|------------|----------------------|
| C(1)-H(1)...O(14)                                  | 0.93(2) | 2.28(2)  | 2.9571(17) | 129.2(15)            |
| C(8B <sup>^b</sup> )-H(8B2 <sup>^b</sup> )...O(13) | 0.99    | 2.57     | 3.190(12)  | 120.5                |
| C(15)-H(15B)...O(13)#1                             | 0.96(2) | 2.52(2)  | 3.447(2)   | 162.4(17)            |
| C(31)-H(31C)...O(14)#2                             | 0.96(3) | 2.52(3)  | 3.402(2)   | 153(2)               |

Symmetry transformations used to generate equivalent atoms:

#1  $x+1/2, -y+1/2, -z+1$  #2  $x-1, y, z$

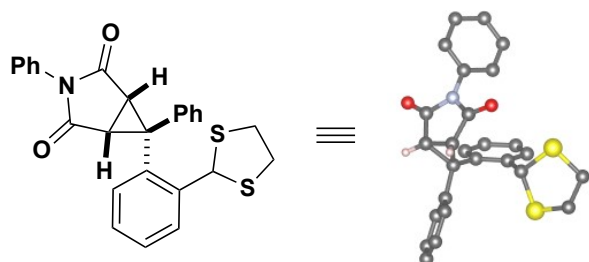

CCDC 2087415

Table 1. Crystal data and structure refinement for  $[\text{C}_{26}\text{H}_{21}\text{NO}_2\text{S}_2]_4[\text{H}_2\text{O}]$

|                        |                                                             |                                |
|------------------------|-------------------------------------------------------------|--------------------------------|
| Identification code    | JF2975KFMI                                                  | (MG-4-44-C)                    |
| Empirical formula      | $\text{C}_{104}\text{H}_{86}\text{N}_4\text{O}_9\text{S}_8$ |                                |
| Formula weight         | 1792.24                                                     |                                |
| Temperature            | 190(2) K                                                    |                                |
| Wavelength             | 1.54178 $\text{\AA}$                                        |                                |
| Crystal system         | Triclinic                                                   |                                |
| Space group            | P-1                                                         |                                |
| Unit cell dimensions   | $a = 8.6339(2) \text{\AA}$                                  | $\angle = 83.1131(13)^\circ$ . |
|                        | $b = 15.2440(3) \text{\AA}$                                 | $\angle = 89.8510(13)^\circ$ . |
|                        | $c = 33.4220(6) \text{\AA}$                                 | $\angle = 83.6116(14)^\circ$ . |
| Volume                 | $4339.73(15) \text{\AA}^3$                                  |                                |
| Z                      | 2                                                           |                                |
| Density (calculated)   | 1.372 $\text{Mg/m}^3$                                       |                                |
| Absorption coefficient | 2.424 $\text{mm}^{-1}$                                      |                                |
| F(000)                 | 1876                                                        |                                |

|                                      |                                                                             |
|--------------------------------------|-----------------------------------------------------------------------------|
| Crystal size                         | 0.192 x 0.083 x 0.016 mm <sup>3</sup>                                       |
| Crystal color and habit              | Colorless Plate                                                             |
| Diffractometer                       | Bruker Photon100 CMOS                                                       |
| Theta range for data collection      | 2.663 to 68.681°.                                                           |
| Index ranges                         | -10<=h<=9, -18<=k<=18, -40<=l<=40                                           |
| Reflections collected                | 28242                                                                       |
| Independent reflections              | 15752 [R(int) = 0.0406]                                                     |
| Observed reflections (I > 2sigma(I)) | 12023                                                                       |
| Completeness to theta = 67.679°      | 98.5 %                                                                      |
| Absorption correction                | Semi-empirical from equivalents                                             |
| Max. and min. transmission           | 0.8384 and 0.7250                                                           |
| Solution method                      | SHELXT (Sheldrick, 2014)                                                    |
| Refinement method                    | SHELXL-2017/1 (Sheldrick, 2017) Full-matrix least-squares on F <sup>2</sup> |
| Data / restraints / parameters       | 15752 / 14 / 1175                                                           |
| Goodness-of-fit on F <sup>2</sup>    | 1.101                                                                       |
| Final R indices [I>2sigma(I)]        | R1 = 0.0609, wR2 = 0.1288                                                   |
| R indices (all data)                 | R1 = 0.0823, wR2 = 0.1436                                                   |
| Extinction coefficient               | 0.00127(6)                                                                  |
| Largest diff. peak and hole          | 0.411 and -0.457 e.Å <sup>-3</sup>                                          |

Table 2. Atomic coordinates ( $\times 10^4$ ) and equivalent isotropic displacement parameters ( $\text{\AA}^2 \times 10^3$ ) for JF2975KFMI.  $U(\text{eq})$  is defined as one third of the trace of the orthogonalized  $U^{ij}$  tensor.

|        | x          | y         | z        | $U(\text{eq})$ |
|--------|------------|-----------|----------|----------------|
| C(1)   | 839(4)     | 2467(2)   | 5410(1)  | 33(1)          |
| C(2)   | 832(4)     | 1473(2)   | 5523(1)  | 35(1)          |
| C(3)   | 1598(4)    | 1792(2)   | 5138(1)  | 36(1)          |
| C(4)   | 3276(4)    | 1483(2)   | 5191(1)  | 36(1)          |
| N(4)   | 3527(3)    | 1108(2)   | 5592(1)  | 35(1)          |
| O(4)   | 4288(3)    | 1517(2)   | 4939(1)  | 44(1)          |
| C(5)   | 2130(4)    | 1053(2)   | 5801(1)  | 36(1)          |
| O(5)   | 2033(3)    | 720(2)    | 6146(1)  | 45(1)          |
| C(6)   | 1827(4)    | 2960(2)   | 5660(1)  | 35(1)          |
| C(7)   | 1394(4)    | 3103(2)   | 6054(1)  | 37(1)          |
| C(8)   | 2354(5)    | 3551(2)   | 6275(1)  | 47(1)          |
| C(9)   | 3693(5)    | 3855(2)   | 6117(1)  | 50(1)          |
| C(10)  | 4122(4)    | 3712(2)   | 5728(1)  | 47(1)          |
| C(11)  | 3183(4)    | 3278(2)   | 5501(1)  | 39(1)          |
| C(12)  | -113(4)    | 2823(2)   | 6236(1)  | 42(1)          |
| S(12)  | 108(1)     | 2218(1)   | 6744(1)  | 50(1)          |
| C(13)  | -2505(15)  | 3400(30)  | 6697(3)  | 60(2)          |
| C(13B) | -2440(100) | 3400(200) | 6673(18) | 60(2)          |
| S(13)  | -1465(3)   | 3829(1)   | 6272(1)  | 65(1)          |
| S(13B) | -1785(17)  | 3505(10)  | 6167(4)  | 63(3)          |
| C(14)  | -1283(5)   | 2941(4)   | 6993(1)  | 69(1)          |
| C(15)  | -644(4)    | 2984(2)   | 5229(1)  | 35(1)          |
| C(16)  | -854(4)    | 3910(2)   | 5205(1)  | 38(1)          |
| C(17)  | -2150(4)   | 4390(2)   | 5006(1)  | 43(1)          |
| C(18)  | -3260(4)   | 3961(2)   | 4836(1)  | 46(1)          |
| C(19)  | -3078(4)   | 3045(3)   | 4864(1)  | 49(1)          |
| C(20)  | -1787(4)   | 2558(2)   | 5060(1)  | 44(1)          |
| C(21)  | 5035(4)    | 838(2)    | 5768(1)  | 38(1)          |
| C(22)  | 6017(5)    | 198(3)    | 5607(1)  | 49(1)          |
| C(23)  | 7501(5)    | -45(3)    | 5774(1)  | 58(1)          |
| C(24)  | 7967(5)    | 327(3)    | 6097(1)  | 61(1)          |

|        |          |          |         |       |
|--------|----------|----------|---------|-------|
| C(25)  | 6967(5)  | 961(3)   | 6260(1) | 62(1) |
| C(26)  | 5493(5)  | 1229(3)  | 6093(1) | 51(1) |
| C(31)  | 4976(4)  | 7531(2)  | 6322(1) | 33(1) |
| C(32)  | 5051(4)  | 8441(2)  | 6465(1) | 36(1) |
| C(33)  | 4107(4)  | 8377(2)  | 6091(1) | 38(1) |
| C(34)  | 2460(4)  | 8609(2)  | 6202(1) | 38(1) |
| N(34)  | 2416(3)  | 8691(2)  | 6613(1) | 33(1) |
| O(34)  | 1315(3)  | 8716(2)  | 5984(1) | 46(1) |
| C(35)  | 3912(4)  | 8652(2)  | 6780(1) | 35(1) |
| C(36)  | 4106(4)  | 6844(2)  | 6558(1) | 33(1) |
| O(36)  | 4175(3)  | 8770(2)  | 7122(1) | 43(1) |
| C(37)  | 4677(4)  | 6405(2)  | 6930(1) | 36(1) |
| C(38)  | 3870(4)  | 5739(2)  | 7125(1) | 48(1) |
| C(39)  | 2561(5)  | 5485(3)  | 6954(1) | 50(1) |
| C(40)  | 2011(4)  | 5902(2)  | 6582(1) | 45(1) |
| C(41)  | 2789(4)  | 6568(2)  | 6387(1) | 38(1) |
| C(42)  | 6186(4)  | 6626(2)  | 7101(1) | 39(1) |
| S(42)  | 7860(1)  | 5869(1)  | 6980(1) | 56(1) |
| C(43)  | 8077(7)  | 5240(4)  | 7456(2) | 49(1) |
| C(43B) | 8760(20) | 5673(15) | 7485(6) | 55(5) |
| S(43)  | 6167(1)  | 6650(1)  | 7646(1) | 45(1) |
| C(44)  | 7798(6)  | 5841(3)  | 7779(1) | 65(1) |
| C(45)  | 6388(4)  | 7142(2)  | 6110(1) | 36(1) |
| C(46)  | 6319(5)  | 6343(2)  | 5952(1) | 48(1) |
| C(47)  | 7603(6)  | 5957(3)  | 5760(1) | 62(1) |
| C(48)  | 8962(5)  | 6350(3)  | 5722(1) | 61(1) |
| C(49)  | 9028(5)  | 7137(3)  | 5875(1) | 55(1) |
| C(50)  | 7768(4)  | 7537(3)  | 6067(1) | 45(1) |
| C(51)  | 1012(4)  | 8830(2)  | 6840(1) | 33(1) |
| C(52)  | 499(4)   | 9673(2)  | 6922(1) | 38(1) |
| C(53)  | -845(4)  | 9807(2)  | 7145(1) | 46(1) |
| C(54)  | -1636(4) | 9101(3)  | 7285(1) | 46(1) |
| C(55)  | -1100(5) | 8254(3)  | 7204(1) | 52(1) |
| C(56)  | 235(5)   | 8116(2)  | 6977(1) | 48(1) |
| C(61)  | 697(3)   | 7216(2)  | 9599(1) | 29(1) |
| C(62)  | 1142(4)  | 6232(2)  | 9578(1) | 32(1) |

|       |          |         |          |       |
|-------|----------|---------|----------|-------|
| C(63) | 157(4)   | 6511(2) | 9925(1)  | 33(1) |
| C(64) | -1388(4) | 6209(2) | 9869(1)  | 34(1) |
| N(64) | -1388(3) | 5858(2) | 9498(1)  | 32(1) |
| O(64) | -2484(3) | 6246(2) | 10095(1) | 44(1) |
| C(65) | 82(4)    | 5833(2) | 9318(1)  | 33(1) |
| O(65) | 397(3)   | 5541(2) | 9004(1)  | 44(1) |
| C(66) | -449(3)  | 7730(2) | 9293(1)  | 31(1) |
| C(67) | -106(4)  | 7865(2) | 8882(1)  | 33(1) |
| C(68) | -1238(4) | 8335(2) | 8616(1)  | 41(1) |
| C(69) | -2678(4) | 8670(3) | 8750(1)  | 48(1) |
| C(70) | -3000(4) | 8551(2) | 9156(1)  | 46(1) |
| C(71) | -1889(4) | 8091(2) | 9424(1)  | 37(1) |
| C(72) | 1480(4)  | 7565(2) | 8721(1)  | 33(1) |
| S(72) | 1436(1)  | 6995(1) | 8267(1)  | 44(1) |
| C(73) | 3499(5)  | 8193(3) | 8158(1)  | 49(1) |
| S(73) | 2531(1)  | 8542(1) | 8599(1)  | 49(1) |
| C(74) | 2309(5)  | 7806(3) | 7925(1)  | 53(1) |
| C(75) | 1906(4)  | 7730(2) | 9756(1)  | 32(1) |
| C(76) | 1411(4)  | 8530(2) | 9902(1)  | 41(1) |
| C(77) | 2483(5)  | 8999(3) | 10074(1) | 50(1) |
| C(78) | 4028(5)  | 8678(3) | 10100(1) | 50(1) |
| C(79) | 4528(4)  | 7892(3) | 9957(1)  | 50(1) |
| C(80) | 3478(4)  | 7413(2) | 9784(1)  | 42(1) |
| C(81) | -2771(4) | 5662(2) | 9310(1)  | 33(1) |
| C(82) | -3206(4) | 6084(2) | 8932(1)  | 44(1) |
| C(83) | -4576(4) | 5912(3) | 8756(1)  | 49(1) |
| C(84) | -5521(4) | 5341(2) | 8959(1)  | 42(1) |
| C(85) | -5080(4) | 4920(2) | 9338(1)  | 39(1) |
| C(86) | -3696(4) | 5077(2) | 9513(1)  | 36(1) |
| C(91) | 5581(4)  | 2182(2) | 8762(1)  | 31(1) |
| C(92) | 5208(4)  | 3155(2) | 8588(1)  | 34(1) |
| C(93) | 6106(4)  | 2936(2) | 8982(1)  | 34(1) |
| C(94) | 7682(4)  | 3202(2) | 8902(1)  | 34(1) |
| N(94) | 7794(3)  | 3444(2) | 8484(1)  | 35(1) |
| O(94) | 8713(3)  | 3228(2) | 9141(1)  | 43(1) |
| C(95) | 6372(4)  | 3458(2) | 8285(1)  | 34(1) |

|        |          |         |         |       |
|--------|----------|---------|---------|-------|
| O(95)  | 6141(3)  | 3680(2) | 7927(1) | 44(1) |
| C(96)  | 6761(4)  | 1600(2) | 8549(1) | 31(1) |
| C(97)  | 6429(4)  | 1353(2) | 8169(1) | 31(1) |
| C(98)  | 7564(4)  | 821(2)  | 7984(1) | 36(1) |
| C(99)  | 8995(4)  | 528(2)  | 8165(1) | 40(1) |
| C(100) | 9306(4)  | 755(2)  | 8543(1) | 40(1) |
| C(101) | 8199(4)  | 1280(2) | 8733(1) | 37(1) |
| C(102) | 4855(4)  | 1622(2) | 7963(1) | 35(1) |
| S(102) | 3698(1)  | 679(1)  | 8028(1) | 53(1) |
| C(103) | 2974(5)  | 749(3)  | 7521(1) | 53(1) |
| S(103) | 4928(1)  | 2007(1) | 7424(1) | 47(1) |
| C(104) | 4203(5)  | 1056(3) | 7240(1) | 57(1) |
| C(105) | 4261(4)  | 1742(2) | 8961(1) | 33(1) |
| C(106) | 2985(4)  | 2223(2) | 9118(1) | 41(1) |
| C(107) | 1818(4)  | 1803(2) | 9318(1) | 44(1) |
| C(108) | 1896(4)  | 884(2)  | 9362(1) | 44(1) |
| C(109) | 3149(4)  | 389(2)  | 9207(1) | 39(1) |
| C(110) | 4326(4)  | 812(2)  | 9008(1) | 36(1) |
| C(111) | 9241(4)  | 3574(2) | 8284(1) | 34(1) |
| C(112) | 9792(4)  | 2993(2) | 8012(1) | 38(1) |
| C(113) | 11181(4) | 3123(2) | 7818(1) | 43(1) |
| C(114) | 12013(4) | 3811(2) | 7895(1) | 45(1) |
| C(115) | 11454(4) | 4372(2) | 8169(1) | 46(1) |
| C(116) | 10066(4) | 4255(2) | 8367(1) | 39(1) |
| O(121) | 2059(14) | 9525(7) | 5178(3) | 81(3) |
| O(122) | 1059(16) | 9654(8) | 5185(4) | 99(4) |

---

Table 3. Bond lengths [Å] and angles [°] for JF2975KFMI.

---

|              |           |
|--------------|-----------|
| C(1)-C(15)   | 1.513(4)  |
| C(1)-C(6)    | 1.513(4)  |
| C(1)-C(2)    | 1.518(4)  |
| C(1)-C(3)    | 1.544(4)  |
| C(2)-C(5)    | 1.494(5)  |
| C(2)-C(3)    | 1.497(4)  |
| C(2)-H(2)    | 1.0000    |
| C(3)-C(4)    | 1.477(5)  |
| C(3)-H(3)    | 1.0000    |
| C(4)-O(4)    | 1.212(4)  |
| C(4)-N(4)    | 1.401(4)  |
| N(4)-C(5)    | 1.398(4)  |
| N(4)-C(21)   | 1.427(4)  |
| C(5)-O(5)    | 1.208(4)  |
| C(6)-C(11)   | 1.397(5)  |
| C(6)-C(7)    | 1.401(4)  |
| C(7)-C(8)    | 1.397(5)  |
| C(7)-C(12)   | 1.517(5)  |
| C(8)-C(9)    | 1.374(5)  |
| C(8)-H(8)    | 0.9500    |
| C(9)-C(10)   | 1.387(5)  |
| C(9)-H(9)    | 0.9500    |
| C(10)-C(11)  | 1.383(5)  |
| C(10)-H(10)  | 0.9500    |
| C(11)-H(11)  | 0.9500    |
| C(12)-S(13B) | 1.681(15) |
| C(12)-S(12)  | 1.833(3)  |
| C(12)-S(13)  | 1.837(4)  |
| C(12)-H(12)  | 1.0000    |
| C(12)-H(12E) | 1.0000    |
| S(12)-C(14)  | 1.808(4)  |
| C(13)-C(14)  | 1.500(6)  |
| C(13)-S(13)  | 1.779(16) |
| C(13)-H(13A) | 0.9900    |

|               |           |
|---------------|-----------|
| C(13)-H(13B)  | 0.9900    |
| C(13B)-C(14)  | 1.500(11) |
| C(13B)-S(13B) | 1.779(18) |
| C(13B)-H(13C) | 0.9900    |
| C(13B)-H(13D) | 0.9900    |
| C(14)-H(14A)  | 0.9900    |
| C(14)-H(14B)  | 0.9900    |
| C(15)-C(16)   | 1.394(5)  |
| C(15)-C(20)   | 1.398(5)  |
| C(16)-C(17)   | 1.390(5)  |
| C(16)-H(16)   | 0.9500    |
| C(17)-C(18)   | 1.379(5)  |
| C(17)-H(17)   | 0.9500    |
| C(18)-C(19)   | 1.379(5)  |
| C(18)-H(18)   | 0.9500    |
| C(19)-C(20)   | 1.388(5)  |
| C(19)-H(19)   | 0.9500    |
| C(20)-H(20)   | 0.9500    |
| C(21)-C(22)   | 1.379(5)  |
| C(21)-C(26)   | 1.379(5)  |
| C(22)-C(23)   | 1.392(6)  |
| C(22)-H(22)   | 0.9500    |
| C(23)-C(24)   | 1.361(6)  |
| C(23)-H(23)   | 0.9500    |
| C(24)-C(25)   | 1.382(6)  |
| C(24)-H(24)   | 0.9500    |
| C(25)-C(26)   | 1.389(6)  |
| C(25)-H(25)   | 0.9500    |
| C(26)-H(26)   | 0.9500    |
| C(31)-C(36)   | 1.503(4)  |
| C(31)-C(45)   | 1.509(4)  |
| C(31)-C(32)   | 1.529(4)  |
| C(31)-C(33)   | 1.539(4)  |
| C(32)-C(35)   | 1.478(4)  |
| C(32)-C(33)   | 1.512(5)  |
| C(32)-H(32)   | 1.0000    |



|               |           |
|---------------|-----------|
| C(33)-C(34)   | 1.483(5)  |
| C(33)-H(33)   | 1.0000    |
| C(34)-O(34)   | 1.214(4)  |
| C(34)-N(34)   | 1.395(4)  |
| N(34)-C(35)   | 1.401(4)  |
| N(34)-C(51)   | 1.437(4)  |
| C(35)-O(36)   | 1.205(4)  |
| C(36)-C(41)   | 1.401(5)  |
| C(36)-C(37)   | 1.403(4)  |
| C(37)-C(38)   | 1.392(5)  |
| C(37)-C(42)   | 1.512(5)  |
| C(38)-C(39)   | 1.380(5)  |
| C(38)-H(38)   | 0.9500    |
| C(39)-C(40)   | 1.388(5)  |
| C(39)-H(39)   | 0.9500    |
| C(40)-C(41)   | 1.377(5)  |
| C(40)-H(40)   | 0.9500    |
| C(41)-H(41)   | 0.9500    |
| C(42)-S(42)   | 1.823(3)  |
| C(42)-S(43)   | 1.826(3)  |
| C(42)-H(42)   | 1.0000    |
| S(42)-C(43)   | 1.756(5)  |
| S(42)-C(43B)  | 1.836(19) |
| C(43)-C(44)   | 1.499(7)  |
| C(43)-H(43A)  | 0.9900    |
| C(43)-H(43B)  | 0.9900    |
| C(43B)-C(44)  | 1.31(2)   |
| C(43B)-H(43C) | 0.9900    |
| C(43B)-H(43D) | 0.9900    |
| S(43)-C(44)   | 1.785(4)  |
| C(44)-H(44A)  | 0.9900    |
| C(44)-H(44B)  | 0.9900    |
| C(44)-H(44C)  | 0.9900    |
| C(44)-H(44D)  | 0.9900    |
| C(45)-C(46)   | 1.392(5)  |
| C(45)-C(50)   | 1.393(5)  |

|             |          |
|-------------|----------|
| C(46)-C(47) | 1.388(5) |
| C(46)-H(46) | 0.9500   |
| C(47)-C(48) | 1.375(7) |
| C(47)-H(47) | 0.9500   |
| C(48)-C(49) | 1.366(6) |
| C(48)-H(48) | 0.9500   |
| C(49)-C(50) | 1.382(5) |
| C(49)-H(49) | 0.9500   |
| C(50)-H(50) | 0.9500   |
| C(51)-C(52) | 1.370(4) |
| C(51)-C(56) | 1.374(5) |
| C(52)-C(53) | 1.388(5) |
| C(52)-H(52) | 0.9500   |
| C(53)-C(54) | 1.373(5) |
| C(53)-H(53) | 0.9500   |
| C(54)-C(55) | 1.381(5) |
| C(54)-H(54) | 0.9500   |
| C(55)-C(56) | 1.389(5) |
| C(55)-H(55) | 0.9500   |
| C(56)-H(56) | 0.9500   |
| C(61)-C(75) | 1.504(4) |
| C(61)-C(66) | 1.509(4) |
| C(61)-C(62) | 1.516(4) |
| C(61)-C(63) | 1.544(4) |
| C(62)-C(65) | 1.489(4) |
| C(62)-C(63) | 1.510(4) |
| C(62)-H(62) | 1.0000   |
| C(63)-C(64) | 1.478(5) |
| C(63)-H(63) | 1.0000   |
| C(64)-O(64) | 1.211(4) |
| C(64)-N(64) | 1.408(4) |
| N(64)-C(65) | 1.401(4) |
| N(64)-C(81) | 1.428(4) |
| C(65)-O(65) | 1.207(4) |
| C(66)-C(71) | 1.394(4) |
| C(66)-C(67) | 1.401(4) |

|              |          |
|--------------|----------|
| C(67)-C(68)  | 1.398(4) |
| C(67)-C(72)  | 1.513(4) |
| C(68)-C(69)  | 1.384(5) |
| C(68)-H(68)  | 0.9500   |
| C(69)-C(70)  | 1.380(5) |
| C(69)-H(69)  | 0.9500   |
| C(70)-C(71)  | 1.385(5) |
| C(70)-H(70)  | 0.9500   |
| C(71)-H(71)  | 0.9500   |
| C(72)-S(73)  | 1.833(3) |
| C(72)-S(72)  | 1.839(3) |
| C(72)-H(72)  | 1.0000   |
| S(72)-C(74)  | 1.809(4) |
| C(73)-C(74)  | 1.503(5) |
| C(73)-S(73)  | 1.798(4) |
| C(73)-H(73A) | 0.9900   |
| C(73)-H(73B) | 0.9900   |
| C(74)-H(74A) | 0.9900   |
| C(74)-H(74B) | 0.9900   |
| C(75)-C(80)  | 1.388(5) |
| C(75)-C(76)  | 1.392(5) |
| C(76)-C(77)  | 1.395(5) |
| C(76)-H(76)  | 0.9500   |
| C(77)-C(78)  | 1.368(6) |
| C(77)-H(77)  | 0.9500   |
| C(78)-C(79)  | 1.367(6) |
| C(78)-H(78)  | 0.9500   |
| C(79)-C(80)  | 1.393(5) |
| C(79)-H(79)  | 0.9500   |
| C(80)-H(80)  | 0.9500   |
| C(81)-C(86)  | 1.380(4) |
| C(81)-C(82)  | 1.381(4) |
| C(82)-C(83)  | 1.386(5) |
| C(82)-H(82)  | 0.9500   |
| C(83)-C(84)  | 1.376(5) |
| C(83)-H(83)  | 0.9500   |

|               |          |
|---------------|----------|
| C(84)-C(85)   | 1.385(5) |
| C(84)-H(84)   | 0.9500   |
| C(85)-C(86)   | 1.388(5) |
| C(85)-H(85)   | 0.9500   |
| C(86)-H(86)   | 0.9500   |
| C(91)-C(105)  | 1.501(4) |
| C(91)-C(96)   | 1.509(4) |
| C(91)-C(92)   | 1.527(4) |
| C(91)-C(93)   | 1.545(4) |
| C(92)-C(95)   | 1.495(4) |
| C(92)-C(93)   | 1.513(4) |
| C(92)-H(92)   | 1.0000   |
| C(93)-C(94)   | 1.477(5) |
| C(93)-H(93)   | 1.0000   |
| C(94)-O(94)   | 1.205(4) |
| C(94)-N(94)   | 1.410(4) |
| N(94)-C(95)   | 1.395(4) |
| N(94)-C(111)  | 1.437(4) |
| C(95)-O(95)   | 1.214(4) |
| C(96)-C(101)  | 1.398(4) |
| C(96)-C(97)   | 1.404(4) |
| C(97)-C(98)   | 1.393(4) |
| C(97)-C(102)  | 1.518(4) |
| C(98)-C(99)   | 1.381(5) |
| C(98)-H(98)   | 0.9500   |
| C(99)-C(100)  | 1.383(5) |
| C(99)-H(99)   | 0.9500   |
| C(100)-C(101) | 1.382(5) |
| C(100)-H(100) | 0.9500   |
| C(101)-H(101) | 0.9500   |
| C(102)-S(103) | 1.827(3) |
| C(102)-S(102) | 1.833(3) |
| C(102)-H(102) | 1.0000   |
| S(102)-C(103) | 1.794(4) |
| C(103)-C(104) | 1.493(6) |
| C(103)-H(10A) | 0.9900   |

|                 |          |
|-----------------|----------|
| C(103)-H(10B)   | 0.9900   |
| S(103)-C(104)   | 1.816(4) |
| C(104)-H(10C)   | 0.9900   |
| C(104)-H(10D)   | 0.9900   |
| C(105)-C(106)   | 1.392(4) |
| C(105)-C(110)   | 1.402(4) |
| C(106)-C(107)   | 1.380(5) |
| C(106)-H(106)   | 0.9500   |
| C(107)-C(108)   | 1.386(5) |
| C(107)-H(107)   | 0.9500   |
| C(108)-C(109)   | 1.385(5) |
| C(108)-H(108)   | 0.9500   |
| C(109)-C(110)   | 1.388(5) |
| C(109)-H(109)   | 0.9500   |
| C(110)-H(110)   | 0.9500   |
| C(111)-C(116)   | 1.378(4) |
| C(111)-C(112)   | 1.390(4) |
| C(112)-C(113)   | 1.383(5) |
| C(112)-H(112)   | 0.9500   |
| C(113)-C(114)   | 1.384(5) |
| C(113)-H(113)   | 0.9500   |
| C(114)-C(115)   | 1.378(5) |
| C(114)-H(114)   | 0.9500   |
| C(115)-C(116)   | 1.386(5) |
| C(115)-H(115)   | 0.9500   |
| C(116)-H(116)   | 0.9500   |
| O(121)-H(12A)   | 0.842(5) |
| O(121)-H(12B)   | 0.842(5) |
| O(122)-H(12C)   | 0.842(5) |
| O(122)-H(12D)   | 0.842(5) |
| C(15)-C(1)-C(6) | 116.4(3) |
| C(15)-C(1)-C(2) | 117.4(3) |
| C(6)-C(1)-C(2)  | 118.3(3) |
| C(15)-C(1)-C(3) | 112.9(3) |
| C(6)-C(1)-C(3)  | 121.0(3) |

|                   |          |
|-------------------|----------|
| C(2)-C(1)-C(3)    | 58.5(2)  |
| C(5)-C(2)-C(3)    | 105.6(3) |
| C(5)-C(2)-C(1)    | 114.2(3) |
| C(3)-C(2)-C(1)    | 61.6(2)  |
| C(5)-C(2)-H(2)    | 120.3    |
| C(3)-C(2)-H(2)    | 120.3    |
| C(1)-C(2)-H(2)    | 120.3    |
| C(4)-C(3)-C(2)    | 106.4(3) |
| C(4)-C(3)-C(1)    | 118.9(3) |
| C(2)-C(3)-C(1)    | 59.9(2)  |
| C(4)-C(3)-H(3)    | 118.8    |
| C(2)-C(3)-H(3)    | 118.8    |
| C(1)-C(3)-H(3)    | 118.8    |
| O(4)-C(4)-N(4)    | 124.2(3) |
| O(4)-C(4)-C(3)    | 128.0(3) |
| N(4)-C(4)-C(3)    | 107.8(3) |
| C(5)-N(4)-C(4)    | 112.0(3) |
| C(5)-N(4)-C(21)   | 124.2(3) |
| C(4)-N(4)-C(21)   | 123.8(3) |
| O(5)-C(5)-N(4)    | 124.6(3) |
| O(5)-C(5)-C(2)    | 127.7(3) |
| N(4)-C(5)-C(2)    | 107.8(3) |
| C(11)-C(6)-C(7)   | 119.3(3) |
| C(11)-C(6)-C(1)   | 120.2(3) |
| C(7)-C(6)-C(1)    | 120.6(3) |
| C(8)-C(7)-C(6)    | 118.5(3) |
| C(8)-C(7)-C(12)   | 119.7(3) |
| C(6)-C(7)-C(12)   | 121.8(3) |
| C(9)-C(8)-C(7)    | 121.9(3) |
| C(9)-C(8)-H(8)    | 119.1    |
| C(7)-C(8)-H(8)    | 119.1    |
| C(8)-C(9)-C(10)   | 119.6(3) |
| C(8)-C(9)-H(9)    | 120.2    |
| C(10)-C(9)-H(9)   | 120.2    |
| C(11)-C(10)-C(9)  | 119.7(4) |
| C(11)-C(10)-H(10) | 120.2    |

|                      |            |
|----------------------|------------|
| C(9)-C(10)-H(10)     | 120.2      |
| C(10)-C(11)-C(6)     | 121.1(3)   |
| C(10)-C(11)-H(11)    | 119.5      |
| C(6)-C(11)-H(11)     | 119.5      |
| C(7)-C(12)-S(13B)    | 120.7(6)   |
| C(7)-C(12)-S(12)     | 114.2(2)   |
| S(13B)-C(12)-S(12)   | 113.3(5)   |
| C(7)-C(12)-S(13)     | 108.3(2)   |
| S(12)-C(12)-S(13)    | 107.00(18) |
| C(7)-C(12)-H(12)     | 109.1      |
| S(12)-C(12)-H(12)    | 109.1      |
| S(13)-C(12)-H(12)    | 109.1      |
| C(7)-C(12)-H(12E)    | 101.5      |
| S(13B)-C(12)-H(12E)  | 101.5      |
| S(12)-C(12)-H(12E)   | 101.5      |
| C(14)-S(12)-C(12)    | 97.69(19)  |
| C(14)-C(13)-S(13)    | 105.5(8)   |
| C(14)-C(13)-H(13A)   | 110.6      |
| S(13)-C(13)-H(13A)   | 110.6      |
| C(14)-C(13)-H(13B)   | 110.6      |
| S(13)-C(13)-H(13B)   | 110.6      |
| H(13A)-C(13)-H(13B)  | 108.8      |
| C(14)-C(13B)-S(13B)  | 117.7(15)  |
| C(14)-C(13B)-H(13C)  | 107.9      |
| S(13B)-C(13B)-H(13C) | 107.9      |
| C(14)-C(13B)-H(13D)  | 107.9      |
| S(13B)-C(13B)-H(13D) | 107.9      |
| H(13C)-C(13B)-H(13D) | 107.2      |
| C(13)-S(13)-C(12)    | 96.9(11)   |
| C(12)-S(13B)-C(13B)  | 97(3)      |
| C(13)-C(14)-S(12)    | 110.0(10)  |
| C(13B)-C(14)-S(12)   | 106(7)     |
| C(13)-C(14)-H(14A)   | 109.7      |
| S(12)-C(14)-H(14A)   | 109.7      |
| C(13)-C(14)-H(14B)   | 109.7      |
| S(12)-C(14)-H(14B)   | 109.7      |

|                     |          |
|---------------------|----------|
| H(14A)-C(14)-H(14B) | 108.2    |
| C(16)-C(15)-C(20)   | 118.2(3) |
| C(16)-C(15)-C(1)    | 120.4(3) |
| C(20)-C(15)-C(1)    | 121.2(3) |
| C(17)-C(16)-C(15)   | 120.4(3) |
| C(17)-C(16)-H(16)   | 119.8    |
| C(15)-C(16)-H(16)   | 119.8    |
| C(18)-C(17)-C(16)   | 120.7(3) |
| C(18)-C(17)-H(17)   | 119.6    |
| C(16)-C(17)-H(17)   | 119.6    |
| C(19)-C(18)-C(17)   | 119.5(3) |
| C(19)-C(18)-H(18)   | 120.3    |
| C(17)-C(18)-H(18)   | 120.3    |
| C(18)-C(19)-C(20)   | 120.4(4) |
| C(18)-C(19)-H(19)   | 119.8    |
| C(20)-C(19)-H(19)   | 119.8    |
| C(19)-C(20)-C(15)   | 120.7(3) |
| C(19)-C(20)-H(20)   | 119.6    |
| C(15)-C(20)-H(20)   | 119.6    |
| C(22)-C(21)-C(26)   | 121.1(3) |
| C(22)-C(21)-N(4)    | 119.4(3) |
| C(26)-C(21)-N(4)    | 119.6(3) |
| C(21)-C(22)-C(23)   | 119.0(4) |
| C(21)-C(22)-H(22)   | 120.5    |
| C(23)-C(22)-H(22)   | 120.5    |
| C(24)-C(23)-C(22)   | 120.7(4) |
| C(24)-C(23)-H(23)   | 119.7    |
| C(22)-C(23)-H(23)   | 119.7    |
| C(23)-C(24)-C(25)   | 119.9(4) |
| C(23)-C(24)-H(24)   | 120.1    |
| C(25)-C(24)-H(24)   | 120.1    |
| C(24)-C(25)-C(26)   | 120.6(4) |
| C(24)-C(25)-H(25)   | 119.7    |
| C(26)-C(25)-H(25)   | 119.7    |
| C(21)-C(26)-C(25)   | 118.7(4) |
| C(21)-C(26)-H(26)   | 120.6    |



|                   |          |
|-------------------|----------|
| C(25)-C(26)-H(26) | 120.6    |
| C(36)-C(31)-C(45) | 113.6(3) |
| C(36)-C(31)-C(32) | 120.8(3) |
| C(45)-C(31)-C(32) | 117.1(3) |
| C(36)-C(31)-C(33) | 121.1(3) |
| C(45)-C(31)-C(33) | 114.6(3) |
| C(32)-C(31)-C(33) | 59.1(2)  |
| C(35)-C(32)-C(33) | 106.2(3) |
| C(35)-C(32)-C(31) | 114.3(3) |
| C(33)-C(32)-C(31) | 60.8(2)  |
| C(35)-C(32)-H(32) | 120.2    |
| C(33)-C(32)-H(32) | 120.2    |
| C(31)-C(32)-H(32) | 120.2    |
| C(34)-C(33)-C(32) | 105.3(3) |
| C(34)-C(33)-C(31) | 116.9(3) |
| C(32)-C(33)-C(31) | 60.1(2)  |
| C(34)-C(33)-H(33) | 119.6    |
| C(32)-C(33)-H(33) | 119.6    |
| C(31)-C(33)-H(33) | 119.6    |
| O(34)-C(34)-N(34) | 123.9(3) |
| O(34)-C(34)-C(33) | 128.0(3) |
| N(34)-C(34)-C(33) | 108.1(3) |
| C(34)-N(34)-C(35) | 112.0(3) |
| C(34)-N(34)-C(51) | 124.7(3) |
| C(35)-N(34)-C(51) | 123.3(2) |
| O(36)-C(35)-N(34) | 124.4(3) |
| O(36)-C(35)-C(32) | 127.8(3) |
| N(34)-C(35)-C(32) | 107.8(3) |
| C(41)-C(36)-C(37) | 118.9(3) |
| C(41)-C(36)-C(31) | 119.7(3) |
| C(37)-C(36)-C(31) | 121.1(3) |
| C(38)-C(37)-C(36) | 118.6(3) |
| C(38)-C(37)-C(42) | 121.4(3) |
| C(36)-C(37)-C(42) | 119.9(3) |
| C(39)-C(38)-C(37) | 121.6(3) |
| C(39)-C(38)-H(38) | 119.2    |

|                      |            |
|----------------------|------------|
| C(37)-C(38)-H(38)    | 119.2      |
| C(38)-C(39)-C(40)    | 120.1(3)   |
| C(38)-C(39)-H(39)    | 119.9      |
| C(40)-C(39)-H(39)    | 119.9      |
| C(41)-C(40)-C(39)    | 119.0(3)   |
| C(41)-C(40)-H(40)    | 120.5      |
| C(39)-C(40)-H(40)    | 120.5      |
| C(40)-C(41)-C(36)    | 121.7(3)   |
| C(40)-C(41)-H(41)    | 119.1      |
| C(36)-C(41)-H(41)    | 119.1      |
| C(37)-C(42)-S(42)    | 112.5(2)   |
| C(37)-C(42)-S(43)    | 113.9(2)   |
| S(42)-C(42)-S(43)    | 108.26(17) |
| C(37)-C(42)-H(42)    | 107.3      |
| S(42)-C(42)-H(42)    | 107.3      |
| S(43)-C(42)-H(42)    | 107.3      |
| C(43)-S(42)-C(42)    | 96.9(2)    |
| C(42)-S(42)-C(43B)   | 97.2(6)    |
| C(44)-C(43)-S(42)    | 109.7(3)   |
| C(44)-C(43)-H(43A)   | 109.7      |
| S(42)-C(43)-H(43A)   | 109.7      |
| C(44)-C(43)-H(43B)   | 109.7      |
| S(42)-C(43)-H(43B)   | 109.7      |
| H(43A)-C(43)-H(43B)  | 108.2      |
| C(44)-C(43B)-S(42)   | 114.7(13)  |
| C(44)-C(43B)-H(43C)  | 108.6      |
| S(42)-C(43B)-H(43C)  | 108.6      |
| C(44)-C(43B)-H(43D)  | 108.6      |
| S(42)-C(43B)-H(43D)  | 108.6      |
| H(43C)-C(43B)-H(43D) | 107.6      |
| C(44)-S(43)-C(42)    | 98.62(18)  |
| C(43B)-C(44)-S(43)   | 115.8(9)   |
| C(43)-C(44)-S(43)    | 110.1(3)   |
| C(43)-C(44)-H(44A)   | 109.6      |
| S(43)-C(44)-H(44A)   | 109.6      |
| C(43)-C(44)-H(44B)   | 109.6      |

|                     |          |
|---------------------|----------|
| S(43)-C(44)-H(44B)  | 109.6    |
| H(44A)-C(44)-H(44B) | 108.2    |
| C(43B)-C(44)-H(44C) | 108.3    |
| S(43)-C(44)-H(44C)  | 108.3    |
| C(43B)-C(44)-H(44D) | 108.3    |
| S(43)-C(44)-H(44D)  | 108.3    |
| H(44C)-C(44)-H(44D) | 107.4    |
| C(46)-C(45)-C(50)   | 118.1(3) |
| C(46)-C(45)-C(31)   | 118.6(3) |
| C(50)-C(45)-C(31)   | 123.4(3) |
| C(47)-C(46)-C(45)   | 120.2(4) |
| C(47)-C(46)-H(46)   | 119.9    |
| C(45)-C(46)-H(46)   | 119.9    |
| C(48)-C(47)-C(46)   | 121.1(4) |
| C(48)-C(47)-H(47)   | 119.4    |
| C(46)-C(47)-H(47)   | 119.4    |
| C(49)-C(48)-C(47)   | 118.8(4) |
| C(49)-C(48)-H(48)   | 120.6    |
| C(47)-C(48)-H(48)   | 120.6    |
| C(48)-C(49)-C(50)   | 121.4(4) |
| C(48)-C(49)-H(49)   | 119.3    |
| C(50)-C(49)-H(49)   | 119.3    |
| C(49)-C(50)-C(45)   | 120.4(4) |
| C(49)-C(50)-H(50)   | 119.8    |
| C(45)-C(50)-H(50)   | 119.8    |
| C(52)-C(51)-C(56)   | 121.7(3) |
| C(52)-C(51)-N(34)   | 119.0(3) |
| C(56)-C(51)-N(34)   | 119.3(3) |
| C(51)-C(52)-C(53)   | 119.0(3) |
| C(51)-C(52)-H(52)   | 120.5    |
| C(53)-C(52)-H(52)   | 120.5    |
| C(54)-C(53)-C(52)   | 120.2(3) |
| C(54)-C(53)-H(53)   | 119.9    |
| C(52)-C(53)-H(53)   | 119.9    |
| C(53)-C(54)-C(55)   | 120.2(3) |
| C(53)-C(54)-H(54)   | 119.9    |

|                   |           |
|-------------------|-----------|
| C(55)-C(54)-H(54) | 119.9     |
| C(54)-C(55)-C(56) | 119.9(3)  |
| C(54)-C(55)-H(55) | 120.0     |
| C(56)-C(55)-H(55) | 120.0     |
| C(51)-C(56)-C(55) | 119.0(3)  |
| C(51)-C(56)-H(56) | 120.5     |
| C(55)-C(56)-H(56) | 120.5     |
| C(75)-C(61)-C(66) | 116.1(3)  |
| C(75)-C(61)-C(62) | 117.5(3)  |
| C(66)-C(61)-C(62) | 119.0(2)  |
| C(75)-C(61)-C(63) | 112.5(2)  |
| C(66)-C(61)-C(63) | 120.5(3)  |
| C(62)-C(61)-C(63) | 59.1(2)   |
| C(65)-C(62)-C(63) | 105.5(3)  |
| C(65)-C(62)-C(61) | 113.8(3)  |
| C(63)-C(62)-C(61) | 61.4(2)   |
| C(65)-C(62)-H(62) | 120.4     |
| C(63)-C(62)-H(62) | 120.4     |
| C(61)-C(62)-H(62) | 120.4     |
| C(64)-C(63)-C(62) | 106.3(2)  |
| C(64)-C(63)-C(61) | 117.6(3)  |
| C(62)-C(63)-C(61) | 59.52(19) |
| C(64)-C(63)-H(63) | 119.3     |
| C(62)-C(63)-H(63) | 119.3     |
| C(61)-C(63)-H(63) | 119.3     |
| O(64)-C(64)-N(64) | 124.5(3)  |
| O(64)-C(64)-C(63) | 127.5(3)  |
| N(64)-C(64)-C(63) | 108.0(3)  |
| C(65)-N(64)-C(64) | 111.7(3)  |
| C(65)-N(64)-C(81) | 124.7(3)  |
| C(64)-N(64)-C(81) | 123.2(3)  |
| O(65)-C(65)-N(64) | 124.7(3)  |
| O(65)-C(65)-C(62) | 127.1(3)  |
| N(64)-C(65)-C(62) | 108.2(3)  |
| C(71)-C(66)-C(67) | 118.8(3)  |
| C(71)-C(66)-C(61) | 119.1(3)  |

|                     |            |
|---------------------|------------|
| C(67)-C(66)-C(61)   | 122.1(3)   |
| C(68)-C(67)-C(66)   | 118.8(3)   |
| C(68)-C(67)-C(72)   | 119.1(3)   |
| C(66)-C(67)-C(72)   | 122.0(3)   |
| C(69)-C(68)-C(67)   | 121.6(3)   |
| C(69)-C(68)-H(68)   | 119.2      |
| C(67)-C(68)-H(68)   | 119.2      |
| C(70)-C(69)-C(68)   | 119.4(3)   |
| C(70)-C(69)-H(69)   | 120.3      |
| C(68)-C(69)-H(69)   | 120.3      |
| C(69)-C(70)-C(71)   | 119.7(3)   |
| C(69)-C(70)-H(70)   | 120.1      |
| C(71)-C(70)-H(70)   | 120.1      |
| C(70)-C(71)-C(66)   | 121.6(3)   |
| C(70)-C(71)-H(71)   | 119.2      |
| C(66)-C(71)-H(71)   | 119.2      |
| C(67)-C(72)-S(73)   | 108.7(2)   |
| C(67)-C(72)-S(72)   | 114.7(2)   |
| S(73)-C(72)-S(72)   | 107.84(16) |
| C(67)-C(72)-H(72)   | 108.5      |
| S(73)-C(72)-H(72)   | 108.5      |
| S(72)-C(72)-H(72)   | 108.5      |
| C(74)-S(72)-C(72)   | 97.73(16)  |
| C(74)-C(73)-S(73)   | 106.5(3)   |
| C(74)-C(73)-H(73A)  | 110.4      |
| S(73)-C(73)-H(73A)  | 110.4      |
| C(74)-C(73)-H(73B)  | 110.4      |
| S(73)-C(73)-H(73B)  | 110.4      |
| H(73A)-C(73)-H(73B) | 108.6      |
| C(73)-S(73)-C(72)   | 97.21(16)  |
| C(73)-C(74)-S(72)   | 107.9(2)   |
| C(73)-C(74)-H(74A)  | 110.1      |
| S(72)-C(74)-H(74A)  | 110.1      |
| C(73)-C(74)-H(74B)  | 110.1      |
| S(72)-C(74)-H(74B)  | 110.1      |
| H(74A)-C(74)-H(74B) | 108.4      |

|                   |          |
|-------------------|----------|
| C(80)-C(75)-C(76) | 118.7(3) |
| C(80)-C(75)-C(61) | 122.8(3) |
| C(76)-C(75)-C(61) | 118.4(3) |
| C(75)-C(76)-C(77) | 120.1(3) |
| C(75)-C(76)-H(76) | 119.9    |
| C(77)-C(76)-H(76) | 119.9    |
| C(78)-C(77)-C(76) | 120.4(4) |
| C(78)-C(77)-H(77) | 119.8    |
| C(76)-C(77)-H(77) | 119.8    |
| C(79)-C(78)-C(77) | 120.0(3) |
| C(79)-C(78)-H(78) | 120.0    |
| C(77)-C(78)-H(78) | 120.0    |
| C(78)-C(79)-C(80) | 120.6(4) |
| C(78)-C(79)-H(79) | 119.7    |
| C(80)-C(79)-H(79) | 119.7    |
| C(75)-C(80)-C(79) | 120.2(3) |
| C(75)-C(80)-H(80) | 119.9    |
| C(79)-C(80)-H(80) | 119.9    |
| C(86)-C(81)-C(82) | 120.3(3) |
| C(86)-C(81)-N(64) | 119.8(3) |
| C(82)-C(81)-N(64) | 119.8(3) |
| C(81)-C(82)-C(83) | 119.5(3) |
| C(81)-C(82)-H(82) | 120.3    |
| C(83)-C(82)-H(82) | 120.3    |
| C(84)-C(83)-C(82) | 120.7(3) |
| C(84)-C(83)-H(83) | 119.6    |
| C(82)-C(83)-H(83) | 119.6    |
| C(83)-C(84)-C(85) | 119.6(3) |
| C(83)-C(84)-H(84) | 120.2    |
| C(85)-C(84)-H(84) | 120.2    |
| C(84)-C(85)-C(86) | 120.0(3) |
| C(84)-C(85)-H(85) | 120.0    |
| C(86)-C(85)-H(85) | 120.0    |
| C(81)-C(86)-C(85) | 119.9(3) |
| C(81)-C(86)-H(86) | 120.1    |
| C(85)-C(86)-H(86) | 120.1    |

|                    |           |
|--------------------|-----------|
| C(105)-C(91)-C(96) | 116.6(3)  |
| C(105)-C(91)-C(92) | 116.2(3)  |
| C(96)-C(91)-C(92)  | 118.4(3)  |
| C(105)-C(91)-C(93) | 114.1(2)  |
| C(96)-C(91)-C(93)  | 120.1(3)  |
| C(92)-C(91)-C(93)  | 59.01(19) |
| C(95)-C(92)-C(93)  | 105.1(3)  |
| C(95)-C(92)-C(91)  | 112.9(3)  |
| C(93)-C(92)-C(91)  | 61.11(19) |
| C(95)-C(92)-H(92)  | 120.8     |
| C(93)-C(92)-H(92)  | 120.8     |
| C(91)-C(92)-H(92)  | 120.8     |
| C(94)-C(93)-C(92)  | 106.5(3)  |
| C(94)-C(93)-C(91)  | 118.4(3)  |
| C(92)-C(93)-C(91)  | 59.89(19) |
| C(94)-C(93)-H(93)  | 118.9     |
| C(92)-C(93)-H(93)  | 118.9     |
| C(91)-C(93)-H(93)  | 118.9     |
| O(94)-C(94)-N(94)  | 124.1(3)  |
| O(94)-C(94)-C(93)  | 128.3(3)  |
| N(94)-C(94)-C(93)  | 107.5(3)  |
| C(95)-N(94)-C(94)  | 112.1(3)  |
| C(95)-N(94)-C(111) | 124.1(3)  |
| C(94)-N(94)-C(111) | 123.5(3)  |
| O(95)-C(95)-N(94)  | 125.2(3)  |
| O(95)-C(95)-C(92)  | 126.7(3)  |
| N(94)-C(95)-C(92)  | 108.1(3)  |
| C(101)-C(96)-C(97) | 118.9(3)  |
| C(101)-C(96)-C(91) | 120.0(3)  |
| C(97)-C(96)-C(91)  | 121.1(3)  |
| C(98)-C(97)-C(96)  | 118.8(3)  |
| C(98)-C(97)-C(102) | 119.2(3)  |
| C(96)-C(97)-C(102) | 122.0(3)  |
| C(99)-C(98)-C(97)  | 121.8(3)  |
| C(99)-C(98)-H(98)  | 119.1     |
| C(97)-C(98)-H(98)  | 119.1     |

|                      |            |
|----------------------|------------|
| C(98)-C(99)-C(100)   | 119.3(3)   |
| C(98)-C(99)-H(99)    | 120.3      |
| C(100)-C(99)-H(99)   | 120.3      |
| C(101)-C(100)-C(99)  | 120.0(3)   |
| C(101)-C(100)-H(100) | 120.0      |
| C(99)-C(100)-H(100)  | 120.0      |
| C(100)-C(101)-C(96)  | 121.1(3)   |
| C(100)-C(101)-H(101) | 119.4      |
| C(96)-C(101)-H(101)  | 119.4      |
| C(97)-C(102)-S(103)  | 115.2(2)   |
| C(97)-C(102)-S(102)  | 109.3(2)   |
| S(103)-C(102)-S(102) | 108.22(16) |
| C(97)-C(102)-H(102)  | 108.0      |
| S(103)-C(102)-H(102) | 108.0      |
| S(102)-C(102)-H(102) | 108.0      |
| C(103)-S(102)-C(102) | 98.51(17)  |
| C(104)-C(103)-S(102) | 108.5(3)   |
| C(104)-C(103)-H(10A) | 110.0      |
| S(102)-C(103)-H(10A) | 110.0      |
| C(104)-C(103)-H(10B) | 110.0      |
| S(102)-C(103)-H(10B) | 110.0      |
| H(10A)-C(103)-H(10B) | 108.4      |
| C(104)-S(103)-C(102) | 97.60(17)  |
| C(103)-C(104)-S(103) | 108.0(3)   |
| C(103)-C(104)-H(10C) | 110.1      |
| S(103)-C(104)-H(10C) | 110.1      |
| C(103)-C(104)-H(10D) | 110.1      |
| S(103)-C(104)-H(10D) | 110.1      |
| H(10C)-C(104)-H(10D) | 108.4      |
| C(106)-C(105)-C(110) | 118.0(3)   |
| C(106)-C(105)-C(91)  | 122.3(3)   |
| C(110)-C(105)-C(91)  | 119.6(3)   |
| C(107)-C(106)-C(105) | 121.4(3)   |
| C(107)-C(106)-H(106) | 119.3      |
| C(105)-C(106)-H(106) | 119.3      |
| C(106)-C(107)-C(108) | 120.0(3)   |



|                      |          |
|----------------------|----------|
| C(106)-C(107)-H(107) | 120.0    |
| C(108)-C(107)-H(107) | 120.0    |
| C(109)-C(108)-C(107) | 119.8(3) |
| C(109)-C(108)-H(108) | 120.1    |
| C(107)-C(108)-H(108) | 120.1    |
| C(108)-C(109)-C(110) | 120.2(3) |
| C(108)-C(109)-H(109) | 119.9    |
| C(110)-C(109)-H(109) | 119.9    |
| C(109)-C(110)-C(105) | 120.6(3) |
| C(109)-C(110)-H(110) | 119.7    |
| C(105)-C(110)-H(110) | 119.7    |
| C(116)-C(111)-C(112) | 121.2(3) |
| C(116)-C(111)-N(94)  | 120.1(3) |
| C(112)-C(111)-N(94)  | 118.7(3) |
| C(113)-C(112)-C(111) | 118.6(3) |
| C(113)-C(112)-H(112) | 120.7    |
| C(111)-C(112)-H(112) | 120.7    |
| C(112)-C(113)-C(114) | 120.9(3) |
| C(112)-C(113)-H(113) | 119.6    |
| C(114)-C(113)-H(113) | 119.6    |
| C(115)-C(114)-C(113) | 119.6(3) |
| C(115)-C(114)-H(114) | 120.2    |
| C(113)-C(114)-H(114) | 120.2    |
| C(114)-C(115)-C(116) | 120.6(3) |
| C(114)-C(115)-H(115) | 119.7    |
| C(116)-C(115)-H(115) | 119.7    |
| C(111)-C(116)-C(115) | 119.2(3) |
| C(111)-C(116)-H(116) | 120.4    |
| C(115)-C(116)-H(116) | 120.4    |
| H(12A)-O(121)-H(12B) | 106.5(9) |
| H(12C)-O(122)-H(12D) | 106.6(9) |

---

Symmetry transformations used to generate equivalent atoms:

Table 4. Anisotropic displacement parameters ( $\text{\AA}^2 \times 10^3$ ) for JF2975KFMI. The anisotropic displacement factor exponent takes the form:  $-2\pi^2 [ h^2 a^{*2}U^{11} + \dots + 2 h k a^* b^* U^{12} ]$

|        | U <sup>11</sup> | U <sup>22</sup> | U <sup>33</sup> | U <sup>23</sup> | U <sup>13</sup> | U <sup>12</sup> |
|--------|-----------------|-----------------|-----------------|-----------------|-----------------|-----------------|
| C(1)   | 39(2)           | 30(2)           | 29(2)           | -3(1)           | 2(1)            | -4(1)           |
| C(2)   | 42(2)           | 31(2)           | 33(2)           | -5(1)           | 3(1)            | -7(1)           |
| C(3)   | 45(2)           | 35(2)           | 29(2)           | -5(1)           | 1(1)            | -5(1)           |
| C(4)   | 51(2)           | 30(2)           | 30(2)           | -7(1)           | 6(1)            | -9(1)           |
| N(4)   | 38(2)           | 35(1)           | 30(1)           | -2(1)           | 2(1)            | -2(1)           |
| O(4)   | 56(2)           | 43(1)           | 36(1)           | -8(1)           | 11(1)           | -8(1)           |
| C(5)   | 46(2)           | 29(2)           | 34(2)           | -3(1)           | 3(1)            | -4(1)           |
| O(5)   | 51(2)           | 47(1)           | 35(1)           | 6(1)            | 5(1)            | -5(1)           |
| C(6)   | 40(2)           | 27(2)           | 36(2)           | -4(1)           | -2(1)           | -2(1)           |
| C(7)   | 45(2)           | 34(2)           | 33(2)           | -6(1)           | -1(1)           | -2(1)           |
| C(8)   | 55(2)           | 48(2)           | 41(2)           | -14(2)          | -2(2)           | -7(2)           |
| C(9)   | 56(2)           | 46(2)           | 52(2)           | -14(2)          | -4(2)           | -12(2)          |
| C(10)  | 46(2)           | 38(2)           | 58(2)           | -5(2)           | -1(2)           | -11(2)          |
| C(11)  | 44(2)           | 33(2)           | 40(2)           | -2(1)           | 4(2)            | -5(1)           |
| C(12)  | 44(2)           | 49(2)           | 31(2)           | -4(1)           | 0(1)            | 0(2)            |
| S(12)  | 59(1)           | 50(1)           | 37(1)           | 3(1)            | -2(1)           | -5(1)           |
| C(13)  | 54(3)           | 76(5)           | 51(3)           | -17(4)          | 13(2)           | -1(3)           |
| C(13B) | 54(4)           | 76(6)           | 52(4)           | -17(5)          | 13(3)           | 0(4)            |
| S(13)  | 64(1)           | 58(1)           | 63(1)           | 9(1)            | 18(1)           | 17(1)           |
| S(13B) | 61(7)           | 79(9)           | 40(5)           | 3(5)            | 7(4)            | 15(6)           |
| C(14)  | 55(3)           | 110(4)          | 40(2)           | -15(2)          | 5(2)            | 0(3)            |
| C(15)  | 41(2)           | 35(2)           | 30(2)           | -2(1)           | 3(1)            | -4(1)           |
| C(16)  | 43(2)           | 39(2)           | 33(2)           | -3(1)           | 1(1)            | -6(2)           |
| C(17)  | 50(2)           | 39(2)           | 37(2)           | -5(1)           | 2(2)            | 3(2)            |
| C(18)  | 45(2)           | 52(2)           | 38(2)           | -4(2)           | -2(2)           | 4(2)            |
| C(19)  | 44(2)           | 55(2)           | 48(2)           | -7(2)           | -6(2)           | -8(2)           |
| C(20)  | 48(2)           | 35(2)           | 50(2)           | -5(2)           | -4(2)           | -6(2)           |
| C(21)  | 42(2)           | 36(2)           | 35(2)           | -2(1)           | 3(1)            | -6(1)           |
| C(22)  | 51(2)           | 50(2)           | 47(2)           | -15(2)          | 5(2)            | 1(2)            |
| C(23)  | 50(2)           | 61(3)           | 60(2)           | -1(2)           | 8(2)            | 9(2)            |
| C(24)  | 44(2)           | 77(3)           | 58(2)           | 15(2)           | -3(2)           | -9(2)           |

|        |        |        |        |        |        |        |
|--------|--------|--------|--------|--------|--------|--------|
| C(25)  | 64(3)  | 70(3)  | 54(2)  | -5(2)  | -16(2) | -16(2) |
| C(26)  | 63(3)  | 46(2)  | 44(2)  | -10(2) | -7(2)  | -2(2)  |
| C(31)  | 36(2)  | 33(2)  | 27(2)  | -2(1)  | 1(1)   | 1(1)   |
| C(32)  | 40(2)  | 36(2)  | 33(2)  | -4(1)  | 5(1)   | -3(1)  |
| C(33)  | 46(2)  | 35(2)  | 28(2)  | 2(1)   | 5(1)   | 5(1)   |
| C(34)  | 49(2)  | 29(2)  | 31(2)  | -1(1)  | 5(2)   | 5(1)   |
| N(34)  | 37(2)  | 32(1)  | 27(1)  | -1(1)  | 2(1)   | 2(1)   |
| O(34)  | 52(2)  | 52(1)  | 30(1)  | -2(1)  | -6(1)  | 10(1)  |
| C(35)  | 43(2)  | 30(2)  | 33(2)  | -4(1)  | 5(1)   | -5(1)  |
| C(36)  | 37(2)  | 32(2)  | 31(2)  | -4(1)  | 5(1)   | 0(1)   |
| O(36)  | 44(1)  | 50(1)  | 38(1)  | -15(1) | 3(1)   | -6(1)  |
| C(37)  | 36(2)  | 37(2)  | 34(2)  | -2(1)  | 2(1)   | 0(1)   |
| C(38)  | 50(2)  | 49(2)  | 42(2)  | 11(2)  | -2(2)  | -12(2) |
| C(39)  | 53(2)  | 47(2)  | 51(2)  | 4(2)   | 4(2)   | -14(2) |
| C(40)  | 44(2)  | 41(2)  | 50(2)  | -6(2)  | -4(2)  | -8(2)  |
| C(41)  | 37(2)  | 39(2)  | 38(2)  | -6(1)  | -3(1)  | 4(1)   |
| C(42)  | 36(2)  | 46(2)  | 31(2)  | 4(1)   | 0(1)   | -1(1)  |
| S(42)  | 44(1)  | 79(1)  | 41(1)  | -2(1)  | 3(1)   | 13(1)  |
| C(43)  | 58(3)  | 41(3)  | 43(3)  | 5(2)   | 3(2)   | 9(2)   |
| C(43B) | 55(12) | 56(12) | 50(11) | 0(9)   | -4(9)  | 1(10)  |
| S(43)  | 44(1)  | 54(1)  | 34(1)  | -2(1)  | 0(1)   | 3(1)   |
| C(44)  | 79(3)  | 62(3)  | 48(2)  | -6(2)  | -17(2) | 21(2)  |
| C(45)  | 41(2)  | 39(2)  | 23(1)  | 0(1)   | 4(1)   | 6(1)   |
| C(46)  | 61(2)  | 44(2)  | 39(2)  | -11(2) | 8(2)   | 3(2)   |
| C(47)  | 84(3)  | 54(2)  | 42(2)  | -11(2) | 13(2)  | 18(2)  |
| C(48)  | 62(3)  | 78(3)  | 34(2)  | -2(2)  | 14(2)  | 28(2)  |
| C(49)  | 39(2)  | 78(3)  | 42(2)  | 5(2)   | 7(2)   | 15(2)  |
| C(50)  | 41(2)  | 54(2)  | 38(2)  | -2(2)  | 2(2)   | 6(2)   |
| C(51)  | 36(2)  | 33(2)  | 28(2)  | -3(1)  | 1(1)   | 0(1)   |
| C(52)  | 45(2)  | 36(2)  | 32(2)  | -3(1)  | 6(1)   | -1(1)  |
| C(53)  | 53(2)  | 41(2)  | 43(2)  | -8(2)  | 13(2)  | 4(2)   |
| C(54)  | 39(2)  | 59(2)  | 40(2)  | -8(2)  | 5(2)   | -4(2)  |
| C(55)  | 54(2)  | 56(2)  | 52(2)  | -13(2) | 15(2)  | -24(2) |
| C(56)  | 55(2)  | 38(2)  | 55(2)  | -13(2) | 11(2)  | -12(2) |
| C(61)  | 29(2)  | 32(2)  | 26(1)  | -5(1)  | 1(1)   | -2(1)  |
| C(62)  | 29(2)  | 36(2)  | 29(2)  | -5(1)  | -4(1)  | 0(1)   |

|       |       |       |       |        |        |        |
|-------|-------|-------|-------|--------|--------|--------|
| C(63) | 34(2) | 40(2) | 25(1) | -2(1)  | -1(1)  | -5(1)  |
| C(64) | 42(2) | 34(2) | 28(2) | -1(1)  | 2(1)   | -6(1)  |
| N(64) | 29(1) | 37(1) | 29(1) | -3(1)  | 1(1)   | -6(1)  |
| O(64) | 43(1) | 57(2) | 36(1) | -8(1)  | 12(1)  | -18(1) |
| C(65) | 32(2) | 32(2) | 35(2) | -3(1)  | 0(1)   | 0(1)   |
| O(65) | 44(1) | 52(1) | 42(1) | -19(1) | 6(1)   | -9(1)  |
| C(66) | 26(2) | 34(2) | 32(2) | -3(1)  | 2(1)   | -5(1)  |
| C(67) | 32(2) | 34(2) | 32(2) | 0(1)   | 0(1)   | -4(1)  |
| C(68) | 40(2) | 44(2) | 36(2) | 5(1)   | 1(1)   | -3(2)  |
| C(69) | 34(2) | 52(2) | 52(2) | 10(2)  | -4(2)  | 4(2)   |
| C(70) | 33(2) | 45(2) | 54(2) | 6(2)   | 6(2)   | 6(2)   |
| C(71) | 35(2) | 37(2) | 38(2) | 0(1)   | 9(1)   | 1(1)   |
| C(72) | 32(2) | 39(2) | 27(1) | -4(1)  | 1(1)   | -3(1)  |
| S(72) | 49(1) | 48(1) | 37(1) | -13(1) | 3(1)   | -9(1)  |
| C(73) | 48(2) | 49(2) | 48(2) | -4(2)  | 16(2)  | -10(2) |
| S(73) | 47(1) | 51(1) | 57(1) | -20(1) | 17(1)  | -19(1) |
| C(74) | 58(2) | 67(3) | 32(2) | -2(2)  | 6(2)   | -3(2)  |
| C(75) | 30(2) | 42(2) | 24(1) | -6(1)  | 2(1)   | -7(1)  |
| C(76) | 42(2) | 46(2) | 36(2) | -9(1)  | 1(1)   | -9(2)  |
| C(77) | 68(3) | 49(2) | 36(2) | -8(2)  | 1(2)   | -20(2) |
| C(78) | 58(2) | 66(2) | 30(2) | 3(2)   | -5(2)  | -31(2) |
| C(79) | 34(2) | 73(3) | 45(2) | -2(2)  | 1(2)   | -20(2) |
| C(80) | 34(2) | 52(2) | 41(2) | -7(2)  | 6(1)   | -9(2)  |
| C(81) | 34(2) | 32(2) | 33(2) | -5(1)  | 1(1)   | -5(1)  |
| C(82) | 46(2) | 52(2) | 34(2) | 6(2)   | -1(2)  | -14(2) |
| C(83) | 44(2) | 61(2) | 41(2) | 1(2)   | -9(2)  | -9(2)  |
| C(84) | 34(2) | 50(2) | 45(2) | -11(2) | -1(1)  | -6(2)  |
| C(85) | 34(2) | 40(2) | 46(2) | -10(2) | 8(1)   | -10(1) |
| C(86) | 36(2) | 35(2) | 35(2) | -2(1)  | 1(1)   | -6(1)  |
| C(91) | 34(2) | 32(2) | 24(1) | -4(1)  | 1(1)   | 0(1)   |
| C(92) | 37(2) | 34(2) | 28(2) | -1(1)  | -2(1)  | 3(1)   |
| C(93) | 41(2) | 29(2) | 30(2) | -5(1)  | -2(1)  | 1(1)   |
| C(94) | 43(2) | 30(2) | 29(2) | -10(1) | -4(1)  | 2(1)   |
| N(94) | 36(2) | 36(1) | 32(1) | -5(1)  | -4(1)  | -2(1)  |
| O(94) | 50(1) | 45(1) | 35(1) | -11(1) | -11(1) | 0(1)   |
| C(95) | 36(2) | 34(2) | 32(2) | -2(1)  | -7(1)  | -3(1)  |

|        |         |       |       |        |        |        |
|--------|---------|-------|-------|--------|--------|--------|
| O(95)  | 44(1)   | 52(1) | 34(1) | 8(1)   | -10(1) | -13(1) |
| C(96)  | 32(2)   | 31(2) | 30(2) | -5(1)  | 2(1)   | 0(1)   |
| C(97)  | 32(2)   | 32(2) | 30(2) | -5(1)  | 5(1)   | -3(1)  |
| C(98)  | 36(2)   | 41(2) | 34(2) | -12(1) | 3(1)   | -4(1)  |
| C(99)  | 38(2)   | 40(2) | 43(2) | -10(1) | 6(2)   | 2(1)   |
| C(100) | 30(2)   | 43(2) | 46(2) | -10(2) | -2(1)  | 5(1)   |
| C(101) | 41(2)   | 37(2) | 35(2) | -10(1) | -5(1)  | 1(1)   |
| C(102) | 32(2)   | 44(2) | 30(2) | -9(1)  | 2(1)   | -5(1)  |
| S(102) | 57(1)   | 63(1) | 42(1) | 0(1)   | -10(1) | -27(1) |
| C(103) | 57(2)   | 53(2) | 50(2) | -16(2) | -16(2) | -5(2)  |
| S(103) | 47(1)   | 62(1) | 31(1) | 2(1)   | 1(1)   | -6(1)  |
| C(104) | 61(3)   | 72(3) | 39(2) | -19(2) | -6(2)  | 1(2)   |
| C(105) | 34(2)   | 38(2) | 26(1) | -5(1)  | -1(1)  | 0(1)   |
| C(106) | 42(2)   | 38(2) | 39(2) | -2(1)  | 2(2)   | 5(2)   |
| C(107) | 34(2)   | 56(2) | 39(2) | -7(2)  | 3(1)   | 6(2)   |
| C(108) | 39(2)   | 54(2) | 38(2) | -4(2)  | 1(2)   | -7(2)  |
| C(109) | 45(2)   | 42(2) | 29(2) | -4(1)  | 1(1)   | -9(2)  |
| C(110) | 42(2)   | 38(2) | 27(2) | -9(1)  | 1(1)   | -2(1)  |
| C(111) | 34(2)   | 31(2) | 34(2) | 0(1)   | -6(1)  | -1(1)  |
| C(112) | 43(2)   | 33(2) | 39(2) | -7(1)  | -2(1)  | -4(1)  |
| C(113) | 45(2)   | 43(2) | 42(2) | -8(2)  | 1(2)   | 0(2)   |
| C(114) | 36(2)   | 47(2) | 50(2) | 5(2)   | -8(2)  | -4(2)  |
| C(115) | 45(2)   | 41(2) | 53(2) | 0(2)   | -19(2) | -11(2) |
| C(116) | 45(2)   | 32(2) | 41(2) | -6(1)  | -15(2) | -4(1)  |
| O(121) | 142(10) | 61(5) | 42(4) | -3(3)  | 5(6)   | -21(6) |
| O(122) | 147(11) | 77(6) | 80(6) | -23(4) | 29(8)  | -21(8) |

---

Table 5. Hydrogen coordinates ( $\times 10^4$ ) and isotropic displacement parameters ( $\text{\AA}^2 \times 10^{-3}$ ) for JF2975KFMI.

|        | x     | y    | z    | U(eq) |
|--------|-------|------|------|-------|
| H(2)   | -163  | 1196 | 5516 | 42    |
| H(3)   | 1078  | 1740 | 4877 | 43    |
| H(8)   | 2073  | 3649 | 6543 | 57    |
| H(9)   | 4322  | 4162 | 6274 | 60    |
| H(10)  | 5056  | 3910 | 5618 | 57    |
| H(11)  | 3465  | 3196 | 5232 | 47    |
| H(12)  | -580  | 2445 | 6054 | 50    |
| H(12E) | -316  | 2339 | 6072 | 50    |
| H(13A) | -3142 | 3883 | 6814 | 72    |
| H(13B) | -3202 | 2970 | 6620 | 72    |
| H(13C) | -2848 | 3958 | 6745 | 72    |
| H(13D) | -3327 | 3003 | 6683 | 72    |
| H(14A) | -1781 | 2589 | 7215 | 82    |
| H(14B) | -739  | 3391 | 7110 | 82    |
| H(16)  | -107  | 4214 | 5324 | 46    |
| H(17)  | -2272 | 5021 | 4988 | 51    |
| H(18)  | -4142 | 4293 | 4701 | 55    |
| H(19)  | -3841 | 2746 | 4748 | 58    |
| H(20)  | -1680 | 1927 | 5079 | 53    |
| H(22)  | 5687  | -73  | 5385 | 59    |
| H(23)  | 8195  | -476 | 5661 | 70    |
| H(24)  | 8977  | 152  | 6211 | 74    |
| H(25)  | 7291  | 1215 | 6487 | 75    |
| H(26)  | 4812  | 1672 | 6202 | 61    |
| H(32)  | 6042  | 8726 | 6443 | 43    |
| H(33)  | 4485  | 8614 | 5821 | 45    |
| H(38)  | 4229  | 5451 | 7381 | 57    |
| H(39)  | 2035  | 5025 | 7092 | 60    |
| H(40)  | 1110  | 5731 | 6463 | 54    |
| H(41)  | 2424  | 6847 | 6130 | 46    |

|        |       |       |       |    |
|--------|-------|-------|-------|----|
| H(42)  | 6358  | 7235  | 6974  | 46 |
| H(43A) | 7324  | 4793  | 7483  | 59 |
| H(43B) | 9142  | 4922  | 7486  | 59 |
| H(43C) | 9211  | 5043  | 7535  | 66 |
| H(43D) | 9621  | 6047  | 7491  | 66 |
| H(44A) | 8737  | 6144  | 7814  | 78 |
| H(44B) | 7597  | 5486  | 8038  | 78 |
| H(44C) | 8396  | 6046  | 7996  | 78 |
| H(44D) | 7403  | 5279  | 7892  | 78 |
| H(46)  | 5390  | 6061  | 5975  | 58 |
| H(47)  | 7541  | 5412  | 5653  | 74 |
| H(48)  | 9839  | 6078  | 5593  | 73 |
| H(49)  | 9960  | 7416  | 5848  | 66 |
| H(50)  | 7843  | 8085  | 6170  | 54 |
| H(52)  | 1056  | 10159 | 6826  | 46 |
| H(53)  | -1219 | 10389 | 7201  | 55 |
| H(54)  | -2555 | 9196  | 7438  | 55 |
| H(55)  | -1643 | 7765  | 7304  | 63 |
| H(56)  | 604   | 7536  | 6916  | 58 |
| H(62)  | 2247  | 5963  | 9625  | 38 |
| H(63)  | 630   | 6440  | 10201 | 40 |
| H(68)  | -1014 | 8426  | 8337  | 50 |
| H(69)  | -3436 | 8980  | 8563  | 58 |
| H(70)  | -3981 | 8783  | 9251  | 55 |
| H(71)  | -2114 | 8020  | 9704  | 45 |
| H(72)  | 2074  | 7154  | 8938  | 39 |
| H(73A) | 3885  | 8706  | 7993  | 58 |
| H(73B) | 4395  | 7741  | 8236  | 58 |
| H(74A) | 2814  | 7519  | 7700  | 64 |
| H(74B) | 1501  | 8281  | 7810  | 64 |
| H(76)  | 340   | 8758  | 9885  | 49 |
| H(77)  | 2138  | 9544  | 10174 | 60 |
| H(78)  | 4753  | 9002  | 10216 | 60 |
| H(79)  | 5602  | 7670  | 9977  | 60 |
| H(80)  | 3838  | 6869  | 9685  | 50 |
| H(82)  | -2572 | 6490  | 8793  | 53 |

|        |           |          |          |     |
|--------|-----------|----------|----------|-----|
| H(83)  | -4866     | 6191     | 8494     | 59  |
| H(84)  | -6469     | 5237     | 8839     | 50  |
| H(85)  | -5725     | 4523     | 9479     | 47  |
| H(86)  | -3385     | 4782     | 9772     | 43  |
| H(92)  | 4113      | 3451     | 8579     | 40  |
| H(93)  | 5575      | 3073     | 9237     | 40  |
| H(98)  | 7347      | 655      | 7727     | 44  |
| H(99)  | 9758      | 174      | 8031     | 49  |
| H(100) | 10280     | 549      | 8671     | 48  |
| H(101) | 8418      | 1427     | 8994     | 45  |
| H(102) | 4300      | 2114     | 8099     | 42  |
| H(10A) | 2715      | 159      | 7464     | 63  |
| H(10B) | 2016      | 1173     | 7485     | 63  |
| H(10C) | 3760      | 1225     | 6965     | 68  |
| H(10D) | 5063      | 572      | 7229     | 68  |
| H(106) | 2916      | 2854     | 9088     | 49  |
| H(107) | 961       | 2145     | 9424     | 52  |
| H(108) | 1093      | 594      | 9498     | 52  |
| H(109) | 3204      | -242     | 9236     | 46  |
| H(110) | 5184      | 468      | 8903     | 43  |
| H(112) | 9227      | 2518     | 7960     | 46  |
| H(113) | 11568     | 2734     | 7630     | 52  |
| H(114) | 12962     | 3896     | 7759     | 54  |
| H(115) | 12025     | 4844     | 8223     | 55  |
| H(116) | 9689      | 4639     | 8558     | 47  |
| H(12A) | 2170(140) | 9160(50) | 5390(17) | 122 |
| H(12B) | 2650(110) | 9310(70) | 5010(20) | 122 |
| H(12C) | 830(180)  | 9580(70) | 5430(12) | 149 |
| H(12D) | 1000(200) | 9160(40) | 5100(30) | 149 |

---



Table 6. Torsion angles [°] for JF2975KFMI.

---

|                       |           |
|-----------------------|-----------|
| C(15)-C(1)-C(2)-C(5)  | -163.4(3) |
| C(6)-C(1)-C(2)-C(5)   | -15.6(4)  |
| C(3)-C(1)-C(2)-C(5)   | 95.3(3)   |
| C(15)-C(1)-C(2)-C(3)  | 101.3(3)  |
| C(6)-C(1)-C(2)-C(3)   | -110.9(3) |
| C(5)-C(2)-C(3)-C(4)   | 4.8(3)    |
| C(1)-C(2)-C(3)-C(4)   | 114.3(3)  |
| C(5)-C(2)-C(3)-C(1)   | -109.5(3) |
| C(15)-C(1)-C(3)-C(4)  | 157.8(3)  |
| C(6)-C(1)-C(3)-C(4)   | 13.2(4)   |
| C(2)-C(1)-C(3)-C(4)   | -93.1(3)  |
| C(15)-C(1)-C(3)-C(2)  | -109.1(3) |
| C(6)-C(1)-C(3)-C(2)   | 106.3(3)  |
| C(2)-C(3)-C(4)-O(4)   | 171.7(3)  |
| C(1)-C(3)-C(4)-O(4)   | -124.1(3) |
| C(2)-C(3)-C(4)-N(4)   | -6.8(3)   |
| C(1)-C(3)-C(4)-N(4)   | 57.4(4)   |
| O(4)-C(4)-N(4)-C(5)   | -172.1(3) |
| C(3)-C(4)-N(4)-C(5)   | 6.4(3)    |
| O(4)-C(4)-N(4)-C(21)  | 9.6(5)    |
| C(3)-C(4)-N(4)-C(21)  | -171.8(3) |
| C(4)-N(4)-C(5)-O(5)   | 176.7(3)  |
| C(21)-N(4)-C(5)-O(5)  | -5.1(5)   |
| C(4)-N(4)-C(5)-C(2)   | -3.3(3)   |
| C(21)-N(4)-C(5)-C(2)  | 174.9(3)  |
| C(3)-C(2)-C(5)-O(5)   | 178.9(3)  |
| C(1)-C(2)-C(5)-O(5)   | 113.5(4)  |
| C(3)-C(2)-C(5)-N(4)   | -1.2(3)   |
| C(1)-C(2)-C(5)-N(4)   | -66.6(3)  |
| C(15)-C(1)-C(6)-C(11) | -103.2(3) |
| C(2)-C(1)-C(6)-C(11)  | 108.7(3)  |
| C(3)-C(1)-C(6)-C(11)  | 40.3(4)   |
| C(15)-C(1)-C(6)-C(7)  | 76.7(4)   |
| C(2)-C(1)-C(6)-C(7)   | -71.4(4)  |

|                           |            |
|---------------------------|------------|
| C(3)-C(1)-C(6)-C(7)       | -139.8(3)  |
| C(11)-C(6)-C(7)-C(8)      | -0.9(5)    |
| C(1)-C(6)-C(7)-C(8)       | 179.2(3)   |
| C(11)-C(6)-C(7)-C(12)     | 176.3(3)   |
| C(1)-C(6)-C(7)-C(12)      | -3.7(5)    |
| C(6)-C(7)-C(8)-C(9)       | 0.3(5)     |
| C(12)-C(7)-C(8)-C(9)      | -176.9(3)  |
| C(7)-C(8)-C(9)-C(10)      | -0.4(6)    |
| C(8)-C(9)-C(10)-C(11)     | 1.1(6)     |
| C(9)-C(10)-C(11)-C(6)     | -1.7(5)    |
| C(7)-C(6)-C(11)-C(10)     | 1.6(5)     |
| C(1)-C(6)-C(11)-C(10)     | -178.5(3)  |
| C(8)-C(7)-C(12)-S(13B)    | 90.2(6)    |
| C(6)-C(7)-C(12)-S(13B)    | -86.9(6)   |
| C(8)-C(7)-C(12)-S(12)     | -50.3(4)   |
| C(6)-C(7)-C(12)-S(12)     | 132.6(3)   |
| C(8)-C(7)-C(12)-S(13)     | 68.8(4)    |
| C(6)-C(7)-C(12)-S(13)     | -108.3(3)  |
| C(7)-C(12)-S(12)-C(14)    | 123.8(3)   |
| S(13B)-C(12)-S(12)-C(14)  | -19.7(6)   |
| S(13)-C(12)-S(12)-C(14)   | 3.9(3)     |
| C(14)-C(13)-S(13)-C(12)   | 46(3)      |
| C(7)-C(12)-S(13)-C(13)    | -150.9(12) |
| S(12)-C(12)-S(13)-C(13)   | -27.3(12)  |
| C(7)-C(12)-S(13B)-C(13B)  | -135(11)   |
| S(12)-C(12)-S(13B)-C(13B) | 6(11)      |
| C(14)-C(13B)-S(13B)-C(12) | 15(23)     |
| S(13)-C(13)-C(14)-S(12)   | -49(3)     |
| S(13B)-C(13B)-C(14)-S(12) | -28(24)    |
| C(12)-S(12)-C(14)-C(13)   | 27.2(18)   |
| C(12)-S(12)-C(14)-C(13B)  | 27(12)     |
| C(6)-C(1)-C(15)-C(16)     | 16.7(4)    |
| C(2)-C(1)-C(15)-C(16)     | 165.1(3)   |
| C(3)-C(1)-C(15)-C(16)     | -129.7(3)  |
| C(6)-C(1)-C(15)-C(20)     | -167.6(3)  |
| C(2)-C(1)-C(15)-C(20)     | -19.1(4)   |

|                         |           |
|-------------------------|-----------|
| C(3)-C(1)-C(15)-C(20)   | 46.1(4)   |
| C(20)-C(15)-C(16)-C(17) | -1.7(5)   |
| C(1)-C(15)-C(16)-C(17)  | 174.1(3)  |
| C(15)-C(16)-C(17)-C(18) | 1.0(5)    |
| C(16)-C(17)-C(18)-C(19) | 0.0(5)    |
| C(17)-C(18)-C(19)-C(20) | -0.2(6)   |
| C(18)-C(19)-C(20)-C(15) | -0.6(6)   |
| C(16)-C(15)-C(20)-C(19) | 1.5(5)    |
| C(1)-C(15)-C(20)-C(19)  | -174.3(3) |
| C(5)-N(4)-C(21)-C(22)   | 122.0(4)  |
| C(4)-N(4)-C(21)-C(22)   | -60.0(4)  |
| C(5)-N(4)-C(21)-C(26)   | -58.7(5)  |
| C(4)-N(4)-C(21)-C(26)   | 119.3(4)  |
| C(26)-C(21)-C(22)-C(23) | -0.9(6)   |
| N(4)-C(21)-C(22)-C(23)  | 178.4(3)  |
| C(21)-C(22)-C(23)-C(24) | 1.4(6)    |
| C(22)-C(23)-C(24)-C(25) | -0.7(7)   |
| C(23)-C(24)-C(25)-C(26) | -0.7(7)   |
| C(22)-C(21)-C(26)-C(25) | -0.4(6)   |
| N(4)-C(21)-C(26)-C(25)  | -179.7(3) |
| C(24)-C(25)-C(26)-C(21) | 1.2(6)    |
| C(36)-C(31)-C(32)-C(35) | -14.5(4)  |
| C(45)-C(31)-C(32)-C(35) | -160.6(3) |
| C(33)-C(31)-C(32)-C(35) | 95.6(3)   |
| C(36)-C(31)-C(32)-C(33) | -110.1(3) |
| C(45)-C(31)-C(32)-C(33) | 103.8(3)  |
| C(35)-C(32)-C(33)-C(34) | 3.4(3)    |
| C(31)-C(32)-C(33)-C(34) | 112.6(3)  |
| C(35)-C(32)-C(33)-C(31) | -109.2(3) |
| C(36)-C(31)-C(33)-C(34) | 16.7(4)   |
| C(45)-C(31)-C(33)-C(34) | 159.0(3)  |
| C(32)-C(31)-C(33)-C(34) | -92.9(3)  |
| C(36)-C(31)-C(33)-C(32) | 109.6(3)  |
| C(45)-C(31)-C(33)-C(32) | -108.1(3) |
| C(32)-C(33)-C(34)-O(34) | 173.2(3)  |
| C(31)-C(33)-C(34)-O(34) | -122.9(4) |

|                         |           |
|-------------------------|-----------|
| C(32)-C(33)-C(34)-N(34) | -6.8(3)   |
| C(31)-C(33)-C(34)-N(34) | 57.1(4)   |
| O(34)-C(34)-N(34)-C(35) | -172.0(3) |
| C(33)-C(34)-N(34)-C(35) | 8.0(3)    |
| O(34)-C(34)-N(34)-C(51) | 6.0(5)    |
| C(33)-C(34)-N(34)-C(51) | -174.0(3) |
| C(34)-N(34)-C(35)-O(36) | 174.5(3)  |
| C(51)-N(34)-C(35)-O(36) | -3.5(5)   |
| C(34)-N(34)-C(35)-C(32) | -5.8(3)   |
| C(51)-N(34)-C(35)-C(32) | 176.2(3)  |
| C(33)-C(32)-C(35)-O(36) | -179.1(3) |
| C(31)-C(32)-C(35)-O(36) | 116.2(4)  |
| C(33)-C(32)-C(35)-N(34) | 1.2(3)    |
| C(31)-C(32)-C(35)-N(34) | -63.6(3)  |
| C(45)-C(31)-C(36)-C(41) | -97.4(3)  |
| C(32)-C(31)-C(36)-C(41) | 115.4(3)  |
| C(33)-C(31)-C(36)-C(41) | 45.3(4)   |
| C(45)-C(31)-C(36)-C(37) | 76.0(4)   |
| C(32)-C(31)-C(36)-C(37) | -71.2(4)  |
| C(33)-C(31)-C(36)-C(37) | -141.4(3) |
| C(41)-C(36)-C(37)-C(38) | -2.9(5)   |
| C(31)-C(36)-C(37)-C(38) | -176.3(3) |
| C(41)-C(36)-C(37)-C(42) | 173.8(3)  |
| C(31)-C(36)-C(37)-C(42) | 0.4(5)    |
| C(36)-C(37)-C(38)-C(39) | 2.0(6)    |
| C(42)-C(37)-C(38)-C(39) | -174.7(4) |
| C(37)-C(38)-C(39)-C(40) | -0.5(6)   |
| C(38)-C(39)-C(40)-C(41) | 0.0(6)    |
| C(39)-C(40)-C(41)-C(36) | -1.0(5)   |
| C(37)-C(36)-C(41)-C(40) | 2.5(5)    |
| C(31)-C(36)-C(41)-C(40) | 176.0(3)  |
| C(38)-C(37)-C(42)-S(42) | 81.5(4)   |
| C(36)-C(37)-C(42)-S(42) | -95.2(3)  |
| C(38)-C(37)-C(42)-S(43) | -42.2(4)  |
| C(36)-C(37)-C(42)-S(43) | 141.1(3)  |
| C(37)-C(42)-S(42)-C(43) | -103.8(3) |

|                          |           |
|--------------------------|-----------|
| S(43)-C(42)-S(42)-C(43)  | 23.0(3)   |
| C(37)-C(42)-S(42)-C(43B) | -134.3(8) |
| S(43)-C(42)-S(42)-C(43B) | -7.6(8)   |
| C(42)-S(42)-C(43)-C(44)  | -39.7(4)  |
| C(42)-S(42)-C(43B)-C(44) | 21.2(16)  |
| C(37)-C(42)-S(43)-C(44)  | 122.8(3)  |
| S(42)-C(42)-S(43)-C(44)  | -3.2(3)   |
| S(42)-C(43B)-C(44)-S(43) | -26.8(18) |
| S(42)-C(43)-C(44)-S(43)  | 42.0(5)   |
| C(42)-S(43)-C(44)-C(43B) | 18.7(12)  |
| C(42)-S(43)-C(44)-C(43)  | -22.7(4)  |
| C(36)-C(31)-C(45)-C(46)  | 35.8(4)   |
| C(32)-C(31)-C(45)-C(46)  | -175.7(3) |
| C(33)-C(31)-C(45)-C(46)  | -109.3(3) |
| C(36)-C(31)-C(45)-C(50)  | -143.6(3) |
| C(32)-C(31)-C(45)-C(50)  | 4.9(4)    |
| C(33)-C(31)-C(45)-C(50)  | 71.2(4)   |
| C(50)-C(45)-C(46)-C(47)  | 0.5(5)    |
| C(31)-C(45)-C(46)-C(47)  | -179.0(3) |
| C(45)-C(46)-C(47)-C(48)  | 0.0(6)    |
| C(46)-C(47)-C(48)-C(49)  | -0.6(6)   |
| C(47)-C(48)-C(49)-C(50)  | 0.6(6)    |
| C(48)-C(49)-C(50)-C(45)  | -0.1(6)   |
| C(46)-C(45)-C(50)-C(49)  | -0.5(5)   |
| C(31)-C(45)-C(50)-C(49)  | 178.9(3)  |
| C(34)-N(34)-C(51)-C(52)  | -99.5(4)  |
| C(35)-N(34)-C(51)-C(52)  | 78.2(4)   |
| C(34)-N(34)-C(51)-C(56)  | 81.7(4)   |
| C(35)-N(34)-C(51)-C(56)  | -100.6(4) |
| C(56)-C(51)-C(52)-C(53)  | -0.4(5)   |
| N(34)-C(51)-C(52)-C(53)  | -179.2(3) |
| C(51)-C(52)-C(53)-C(54)  | 0.6(5)    |
| C(52)-C(53)-C(54)-C(55)  | -0.1(6)   |
| C(53)-C(54)-C(55)-C(56)  | -0.7(6)   |
| C(52)-C(51)-C(56)-C(55)  | -0.3(6)   |
| N(34)-C(51)-C(56)-C(55)  | 178.5(3)  |

|                         |           |
|-------------------------|-----------|
| C(54)-C(55)-C(56)-C(51) | 0.9(6)    |
| C(75)-C(61)-C(62)-C(65) | -163.7(3) |
| C(66)-C(61)-C(62)-C(65) | -14.9(4)  |
| C(63)-C(61)-C(62)-C(65) | 95.3(3)   |
| C(75)-C(61)-C(62)-C(63) | 101.0(3)  |
| C(66)-C(61)-C(62)-C(63) | -110.2(3) |
| C(65)-C(62)-C(63)-C(64) | 3.8(3)    |
| C(61)-C(62)-C(63)-C(64) | 112.8(3)  |
| C(65)-C(62)-C(63)-C(61) | -109.0(3) |
| C(75)-C(61)-C(63)-C(64) | 157.0(3)  |
| C(66)-C(61)-C(63)-C(64) | 14.2(4)   |
| C(62)-C(61)-C(63)-C(64) | -93.4(3)  |
| C(75)-C(61)-C(63)-C(62) | -109.5(3) |
| C(66)-C(61)-C(63)-C(62) | 107.7(3)  |
| C(62)-C(63)-C(64)-O(64) | 174.5(3)  |
| C(61)-C(63)-C(64)-O(64) | -121.8(4) |
| C(62)-C(63)-C(64)-N(64) | -5.5(3)   |
| C(61)-C(63)-C(64)-N(64) | 58.2(3)   |
| O(64)-C(64)-N(64)-C(65) | -174.8(3) |
| C(63)-C(64)-N(64)-C(65) | 5.1(3)    |
| O(64)-C(64)-N(64)-C(81) | 12.5(5)   |
| C(63)-C(64)-N(64)-C(81) | -167.6(3) |
| C(64)-N(64)-C(65)-O(65) | 178.1(3)  |
| C(81)-N(64)-C(65)-O(65) | -9.3(5)   |
| C(64)-N(64)-C(65)-C(62) | -2.6(3)   |
| C(81)-N(64)-C(65)-C(62) | 170.0(3)  |
| C(63)-C(62)-C(65)-O(65) | 178.4(3)  |
| C(61)-C(62)-C(65)-O(65) | 113.3(4)  |
| C(63)-C(62)-C(65)-N(64) | -0.9(3)   |
| C(61)-C(62)-C(65)-N(64) | -66.0(3)  |
| C(75)-C(61)-C(66)-C(71) | -95.6(3)  |
| C(62)-C(61)-C(66)-C(71) | 115.2(3)  |
| C(63)-C(61)-C(66)-C(71) | 46.0(4)   |
| C(75)-C(61)-C(66)-C(67) | 83.8(4)   |
| C(62)-C(61)-C(66)-C(67) | -65.4(4)  |
| C(63)-C(61)-C(66)-C(67) | -134.6(3) |

|                         |           |
|-------------------------|-----------|
| C(71)-C(66)-C(67)-C(68) | -1.8(5)   |
| C(61)-C(66)-C(67)-C(68) | 178.8(3)  |
| C(71)-C(66)-C(67)-C(72) | 174.5(3)  |
| C(61)-C(66)-C(67)-C(72) | -4.9(5)   |
| C(66)-C(67)-C(68)-C(69) | 0.2(5)    |
| C(72)-C(67)-C(68)-C(69) | -176.2(3) |
| C(67)-C(68)-C(69)-C(70) | 0.9(6)    |
| C(68)-C(69)-C(70)-C(71) | -0.5(6)   |
| C(69)-C(70)-C(71)-C(66) | -1.0(6)   |
| C(67)-C(66)-C(71)-C(70) | 2.2(5)    |
| C(61)-C(66)-C(71)-C(70) | -178.4(3) |
| C(68)-C(67)-C(72)-S(73) | 71.9(3)   |
| C(66)-C(67)-C(72)-S(73) | -104.3(3) |
| C(68)-C(67)-C(72)-S(72) | -48.8(4)  |
| C(66)-C(67)-C(72)-S(72) | 134.9(3)  |
| C(67)-C(72)-S(72)-C(74) | 115.4(3)  |
| S(73)-C(72)-S(72)-C(74) | -5.8(2)   |
| C(74)-C(73)-S(73)-C(72) | 42.6(3)   |
| C(67)-C(72)-S(73)-C(73) | -143.5(2) |
| S(72)-C(72)-S(73)-C(73) | -18.6(2)  |
| S(73)-C(73)-C(74)-S(72) | -51.1(3)  |
| C(72)-S(72)-C(74)-C(73) | 34.7(3)   |
| C(66)-C(61)-C(75)-C(80) | -133.2(3) |
| C(62)-C(61)-C(75)-C(80) | 16.5(4)   |
| C(63)-C(61)-C(75)-C(80) | 82.2(4)   |
| C(66)-C(61)-C(75)-C(76) | 51.1(4)   |
| C(62)-C(61)-C(75)-C(76) | -159.2(3) |
| C(63)-C(61)-C(75)-C(76) | -93.5(3)  |
| C(80)-C(75)-C(76)-C(77) | -0.1(5)   |
| C(61)-C(75)-C(76)-C(77) | 175.8(3)  |
| C(75)-C(76)-C(77)-C(78) | 0.1(5)    |
| C(76)-C(77)-C(78)-C(79) | -0.3(5)   |
| C(77)-C(78)-C(79)-C(80) | 0.3(5)    |
| C(76)-C(75)-C(80)-C(79) | 0.1(5)    |
| C(61)-C(75)-C(80)-C(79) | -175.6(3) |
| C(78)-C(79)-C(80)-C(75) | -0.2(5)   |

|                          |           |
|--------------------------|-----------|
| C(65)-N(64)-C(81)-C(86)  | 130.5(3)  |
| C(64)-N(64)-C(81)-C(86)  | -57.7(4)  |
| C(65)-N(64)-C(81)-C(82)  | -51.9(4)  |
| C(64)-N(64)-C(81)-C(82)  | 119.9(3)  |
| C(86)-C(81)-C(82)-C(83)  | -0.4(5)   |
| N(64)-C(81)-C(82)-C(83)  | -177.9(3) |
| C(81)-C(82)-C(83)-C(84)  | 1.5(6)    |
| C(82)-C(83)-C(84)-C(85)  | -1.4(6)   |
| C(83)-C(84)-C(85)-C(86)  | 0.2(5)    |
| C(82)-C(81)-C(86)-C(85)  | -0.8(5)   |
| N(64)-C(81)-C(86)-C(85)  | 176.8(3)  |
| C(84)-C(85)-C(86)-C(81)  | 0.9(5)    |
| C(105)-C(91)-C(92)-C(95) | -161.2(3) |
| C(96)-C(91)-C(92)-C(95)  | -14.7(4)  |
| C(93)-C(91)-C(92)-C(95)  | 95.2(3)   |
| C(105)-C(91)-C(92)-C(93) | 103.5(3)  |
| C(96)-C(91)-C(92)-C(93)  | -109.9(3) |
| C(95)-C(92)-C(93)-C(94)  | 5.5(3)    |
| C(91)-C(92)-C(93)-C(94)  | 113.6(3)  |
| C(95)-C(92)-C(93)-C(91)  | -108.1(3) |
| C(105)-C(91)-C(93)-C(94) | 159.3(3)  |
| C(96)-C(91)-C(93)-C(94)  | 13.6(4)   |
| C(92)-C(91)-C(93)-C(94)  | -93.4(3)  |
| C(105)-C(91)-C(93)-C(92) | -107.2(3) |
| C(96)-C(91)-C(93)-C(92)  | 107.0(3)  |
| C(92)-C(93)-C(94)-O(94)  | 171.6(3)  |
| C(91)-C(93)-C(94)-O(94)  | -124.1(3) |
| C(92)-C(93)-C(94)-N(94)  | -7.5(3)   |
| C(91)-C(93)-C(94)-N(94)  | 56.8(3)   |
| O(94)-C(94)-N(94)-C(95)  | -172.4(3) |
| C(93)-C(94)-N(94)-C(95)  | 6.8(3)    |
| O(94)-C(94)-N(94)-C(111) | 13.4(5)   |
| C(93)-C(94)-N(94)-C(111) | -167.4(3) |
| C(94)-N(94)-C(95)-O(95)  | 176.9(3)  |
| C(111)-N(94)-C(95)-O(95) | -9.0(5)   |
| C(94)-N(94)-C(95)-C(92)  | -3.2(3)   |



|                             |           |
|-----------------------------|-----------|
| C(111)-N(94)-C(95)-C(92)    | 171.0(3)  |
| C(93)-C(92)-C(95)-O(95)     | 178.3(3)  |
| C(91)-C(92)-C(95)-O(95)     | 113.7(4)  |
| C(93)-C(92)-C(95)-N(94)     | -1.6(3)   |
| C(91)-C(92)-C(95)-N(94)     | -66.2(3)  |
| C(105)-C(91)-C(96)-C(101)   | -101.6(3) |
| C(92)-C(91)-C(96)-C(101)    | 112.1(3)  |
| C(93)-C(91)-C(96)-C(101)    | 43.4(4)   |
| C(105)-C(91)-C(96)-C(97)    | 76.9(4)   |
| C(92)-C(91)-C(96)-C(97)     | -69.5(4)  |
| C(93)-C(91)-C(96)-C(97)     | -138.2(3) |
| C(101)-C(96)-C(97)-C(98)    | -2.0(5)   |
| C(91)-C(96)-C(97)-C(98)     | 179.5(3)  |
| C(101)-C(96)-C(97)-C(102)   | 175.8(3)  |
| C(91)-C(96)-C(97)-C(102)    | -2.6(5)   |
| C(96)-C(97)-C(98)-C(99)     | 0.4(5)    |
| C(102)-C(97)-C(98)-C(99)    | -177.5(3) |
| C(97)-C(98)-C(99)-C(100)    | 1.1(5)    |
| C(98)-C(99)-C(100)-C(101)   | -0.9(5)   |
| C(99)-C(100)-C(101)-C(96)   | -0.7(5)   |
| C(97)-C(96)-C(101)-C(100)   | 2.2(5)    |
| C(91)-C(96)-C(101)-C(100)   | -179.3(3) |
| C(98)-C(97)-C(102)-S(103)   | -45.4(4)  |
| C(96)-C(97)-C(102)-S(103)   | 136.8(3)  |
| C(98)-C(97)-C(102)-S(102)   | 76.7(3)   |
| C(96)-C(97)-C(102)-S(102)   | -101.2(3) |
| C(97)-C(102)-S(102)-C(103)  | -135.1(2) |
| S(103)-C(102)-S(102)-C(103) | -8.9(2)   |
| C(102)-S(102)-C(103)-C(104) | 34.6(3)   |
| C(97)-C(102)-S(103)-C(104)  | 109.1(3)  |
| S(102)-C(102)-S(103)-C(104) | -13.5(2)  |
| S(102)-C(103)-C(104)-S(103) | -47.5(3)  |
| C(102)-S(103)-C(104)-C(103) | 37.3(3)   |
| C(96)-C(91)-C(105)-C(106)   | -170.9(3) |
| C(92)-C(91)-C(105)-C(106)   | -23.8(4)  |
| C(93)-C(91)-C(105)-C(106)   | 42.1(4)   |

|                             |           |
|-----------------------------|-----------|
| C(96)-C(91)-C(105)-C(110)   | 11.9(4)   |
| C(92)-C(91)-C(105)-C(110)   | 159.0(3)  |
| C(93)-C(91)-C(105)-C(110)   | -135.1(3) |
| C(110)-C(105)-C(106)-C(107) | 0.4(5)    |
| C(91)-C(105)-C(106)-C(107)  | -176.9(3) |
| C(105)-C(106)-C(107)-C(108) | -0.4(5)   |
| C(106)-C(107)-C(108)-C(109) | 0.2(5)    |
| C(107)-C(108)-C(109)-C(110) | 0.2(5)    |
| C(108)-C(109)-C(110)-C(105) | -0.2(5)   |
| C(106)-C(105)-C(110)-C(109) | -0.1(5)   |
| C(91)-C(105)-C(110)-C(109)  | 177.3(3)  |
| C(95)-N(94)-C(111)-C(116)   | 121.6(3)  |
| C(94)-N(94)-C(111)-C(116)   | -64.8(4)  |
| C(95)-N(94)-C(111)-C(112)   | -59.4(4)  |
| C(94)-N(94)-C(111)-C(112)   | 114.2(3)  |
| C(116)-C(111)-C(112)-C(113) | -1.4(5)   |
| N(94)-C(111)-C(112)-C(113)  | 179.7(3)  |
| C(111)-C(112)-C(113)-C(114) | 0.5(5)    |
| C(112)-C(113)-C(114)-C(115) | 0.3(5)    |
| C(113)-C(114)-C(115)-C(116) | -0.3(5)   |
| C(112)-C(111)-C(116)-C(115) | 1.4(5)    |
| N(94)-C(111)-C(116)-C(115)  | -179.6(3) |
| C(114)-C(115)-C(116)-C(111) | -0.6(5)   |

---

Symmetry transformations used to generate equivalent atoms:

Table 7. Hydrogen bonds for JF2975KFMI [ $\text{\AA}$  and  $^\circ$ ].

| D-H...A                 | d(D-H)   | d(H...A) | d(D...A)  | $\angle(\text{DHA})$ |
|-------------------------|----------|----------|-----------|----------------------|
| C(22)-H(22)...O(4)#1    | 0.95     | 2.57     | 3.397(4)  | 146                  |
| C(43)-H(43A)...O(95)    | 0.99     | 2.43     | 3.300(6)  | 147                  |
| C(52)-H(52)...O(5)#2    | 0.95     | 2.51     | 3.239(4)  | 133                  |
| C(63)-H(63)...O(94)#3   | 1.00     | 2.40     | 3.355(4)  | 160                  |
| C(73)-H(73A)...S(102)#2 | 0.99     | 3.01     | 3.785(4)  | 136                  |
| C(116)-H(116)...O(65)#4 | 0.95     | 2.27     | 3.097(4)  | 144                  |
| O(121)-H(12A)...O(34)   | 0.842(5) | 2.17(5)  | 2.925(10) | 148(9)               |
| O(122)-H(12C)...O(34)   | 0.842(5) | 2.16(8)  | 2.872(13) | 143(12)              |

Symmetry transformations used to generate equivalent atoms:

#1  $-x+1, -y, -z+1$  #2  $x, y+1, z$  #3  $-x+1, -y+1, -z+2$

#4  $x+1, y, z$

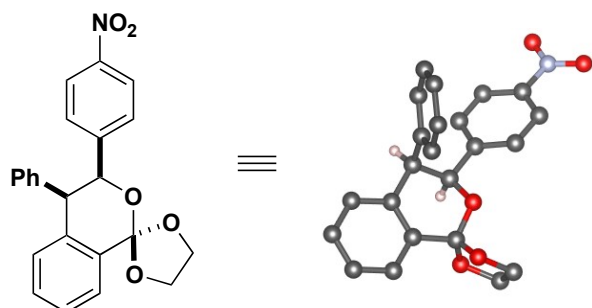

CCDC 2087128

Table 1. Crystal data and structure refinement for  $[\text{C}_{23}\text{H}_{19}\text{NO}_5]_{0.91:0.09}$ .

|                      |                                                            |                       |
|----------------------|------------------------------------------------------------|-----------------------|
| Identification code  | JF2983FMI (MG-4-62-2) (Whole Molecule Disorder, 0.91:0.09) |                       |
| Empirical formula    | $\text{C}_{23}\text{H}_{19}\text{N}\text{O}_5$             |                       |
| Formula weight       | 389.39                                                     |                       |
| Temperature          | 90(2) K                                                    |                       |
| Wavelength           | 1.54178 $\text{\AA}$                                       |                       |
| Crystal system       | Orthorhombic                                               |                       |
| Space group          | Pca2 <sub>1</sub>                                          |                       |
| Unit cell dimensions | $a = 19.1967(9)$ $\text{\AA}$                              | $\alpha = 90^\circ$ . |
|                      | $b = 13.7962(6)$ $\text{\AA}$                              | $\beta = 90^\circ$ .  |
|                      | $c = 13.8480(6)$ $\text{\AA}$                              | $\gamma = 90^\circ$ . |
| Volume               | $3667.5(3)$ $\text{\AA}^3$                                 |                       |

|                                      |                                                                             |
|--------------------------------------|-----------------------------------------------------------------------------|
| Z, Z'                                | 8, 2                                                                        |
| Density (calculated)                 | 1.410 Mg/m <sup>3</sup>                                                     |
| Absorption coefficient               | 0.823 mm <sup>-1</sup>                                                      |
| F(000)                               | 1632                                                                        |
| Crystal size                         | 0.549 x 0.333 x 0.178 mm <sup>3</sup>                                       |
| Crystal color and habit              | colourless Block                                                            |
| Diffractometer                       | Bruker APEX-II CCD                                                          |
| Theta range for data collection      | 3.203 to 69.545°.                                                           |
| Index ranges                         | -21<=h<=23, -16<=k<=16, -16<=l<=16                                          |
| Reflections collected                | 17934                                                                       |
| Independent reflections              | 6717 [R(int) = 0.0207]                                                      |
| Observed reflections (I > 2sigma(I)) | 6644                                                                        |
| Completeness to theta = 67.679°      | 99.9 %                                                                      |
| Absorption correction                | Semi-empirical from equivalents                                             |
| Max. and min. transmission           | 0.8116 and 0.7343                                                           |
| Solution method                      | SHELXT (Sheldrick, 2014)                                                    |
| Refinement method                    | SHELXL-2017/1 (Sheldrick, 2017) Full-matrix least-squares on F <sup>2</sup> |
| Data / restraints / parameters       | 6717 / 432 / 683                                                            |
| Goodness-of-fit on F <sup>2</sup>    | 1.045                                                                       |
| Final R indices [I>2sigma(I)]        | R1 = 0.0341, wR2 = 0.0903                                                   |
| R indices (all data)                 | R1 = 0.0343, wR2 = 0.0906                                                   |
| Absolute structure parameters        | Flack = 0.02(4); Hooft = 0.02(3); Parson's = 0.06(3)                        |
| Largest diff. peak and hole          | 0.156 and -0.400 e.Å <sup>-3</sup>                                          |

Table 2. Atomic coordinates ( $\times 10^4$ ) and equivalent isotropic displacement parameters ( $\text{\AA}^2 \times 10^3$ ) for JF2983FMI.  $U(\text{eq})$  is defined as one third of the trace of the orthogonalized  $U^{ij}$  tensor.

|       | x       | y       | z       | $U(\text{eq})$ |
|-------|---------|---------|---------|----------------|
| C(1)  | 3110(1) | 5068(2) | 4560(2) | 14(1)          |
| O(1)  | 2590(1) | 4502(2) | 4128(2) | 15(1)          |
| C(2)  | 1969(1) | 5055(1) | 3946(2) | 13(1)          |
| O(2)  | 3409(1) | 5700(1) | 3877(1) | 16(1)          |
| C(3)  | 1608(1) | 5256(2) | 4925(1) | 13(1)          |
| O(3)  | 3639(1) | 4422(1) | 4822(1) | 17(1)          |
| C(4)  | 2130(1) | 5772(2) | 5569(2) | 16(1)          |
| C(5)  | 2845(1) | 5651(2) | 5399(2) | 15(1)          |
| C(6)  | 3328(1) | 6119(2) | 5990(2) | 16(1)          |
| C(7)  | 3100(1) | 6705(2) | 6751(2) | 18(1)          |
| C(8)  | 2390(2) | 6827(2) | 6908(2) | 17(1)          |
| C(9)  | 1911(1) | 6366(2) | 6324(2) | 16(1)          |
| C(10) | 3892(1) | 5128(2) | 3321(2) | 25(1)          |
| C(11) | 4016(1) | 4232(2) | 3943(2) | 21(1)          |
| C(12) | 1535(1) | 4519(1) | 3214(2) | 14(1)          |
| C(13) | 930(1)  | 4950(2) | 2853(2) | 15(1)          |
| C(14) | 539(1)  | 4502(1) | 2143(2) | 15(1)          |
| C(15) | 760(1)  | 3605(1) | 1810(1) | 14(1)          |
| N(15) | 353(1)  | 3135(2) | 1051(2) | 17(1)          |
| O(15) | -167(1) | 3553(1) | 745(1)  | 23(1)          |
| C(16) | 1352(1) | 3157(2) | 2150(2) | 17(1)          |
| O(16) | 554(1)  | 2346(1) | 738(1)  | 24(1)          |
| C(17) | 1740(1) | 3617(2) | 2859(2) | 18(1)          |
| C(18) | 1321(1) | 4340(2) | 5400(2) | 16(1)          |
| C(19) | 1739(1) | 3753(2) | 5970(2) | 18(1)          |
| C(20) | 1480(1) | 2902(2) | 6366(2) | 27(1)          |
| C(21) | 804(2)  | 2634(2) | 6205(3) | 36(1)          |
| C(22) | 372(1)  | 3214(2) | 5623(2) | 30(1)          |
| C(23) | 635(1)  | 4063(2) | 5238(2) | 23(1)          |
| C(31) | 1883(1) | 9928(2) | 6883(2) | 18(1)          |
| O(31) | 2424(1) | 9364(1) | 6485(1) | 16(1)          |

|        |          |          |          |       |
|--------|----------|----------|----------|-------|
| C(32)  | 3038(1)  | 9933(1)  | 6306(2)  | 14(1) |
| O(32)  | 1587(1)  | 10524(1) | 6167(1)  | 20(1) |
| C(33)  | 3376(1)  | 10158(2) | 7292(2)  | 15(1) |
| O(33)  | 1364(1)  | 9276(1)  | 7154(1)  | 20(1) |
| C(34)  | 2833(1)  | 10677(2) | 7904(2)  | 17(1) |
| C(35)  | 2124(1)  | 10546(2) | 7712(2)  | 18(1) |
| C(36)  | 1629(1)  | 11015(2) | 8283(2)  | 20(1) |
| C(37)  | 1833(1)  | 11597(2) | 9046(2)  | 24(1) |
| C(38)  | 2540(1)  | 11722(2) | 9244(2)  | 23(1) |
| C(39)  | 3032(1)  | 11265(2) | 8673(2)  | 20(1) |
| C(40)  | 1098(1)  | 9932(2)  | 5645(2)  | 27(1) |
| C(41)  | 1006(1)  | 9035(2)  | 6271(2)  | 26(1) |
| C(42)  | 3488(1)  | 9412(2)  | 5580(2)  | 16(1) |
| C(43)  | 4096(1)  | 9856(2)  | 5241(2)  | 16(1) |
| C(44)  | 4484(1)  | 9442(2)  | 4511(2)  | 18(1) |
| C(45)  | 4263(1)  | 8570(2)  | 4125(2)  | 17(1) |
| N(45)  | 4659(1)  | 8151(2)  | 3319(2)  | 20(1) |
| O(45)  | 5189(1)  | 8569(1)  | 3051(1)  | 27(1) |
| C(46)  | 3674(1)  | 8098(2)  | 4449(2)  | 19(1) |
| O(46)  | 4438(1)  | 7405(1)  | 2934(1)  | 28(1) |
| C(47)  | 3285(1)  | 8527(2)  | 5176(2)  | 18(1) |
| C(48)  | 3656(2)  | 9266(2)  | 7821(3)  | 17(1) |
| C(49)  | 3222(1)  | 8711(2)  | 8405(2)  | 17(1) |
| C(50)  | 3485(1)  | 7929(2)  | 8921(2)  | 19(1) |
| C(51)  | 4186(1)  | 7698(2)  | 8864(2)  | 21(1) |
| C(52)  | 4618(1)  | 8241(2)  | 8270(2)  | 24(1) |
| C(53)  | 4354(1)  | 9022(2)  | 7749(2)  | 21(1) |
| C(101) | 1865(9)  | 5036(14) | 4659(14) | 21(2) |
| O(101) | 2413(11) | 4446(18) | 4210(20) | 20(4) |
| C(102) | 3029(11) | 4989(18) | 4039(16) | 34(3) |
| O(102) | 1602(10) | 5570(14) | 3884(15) | 42(3) |
| C(103) | 3367(11) | 5170(17) | 5013(15) | 28(3) |
| O(103) | 1389(11) | 4339(15) | 5038(18) | 26(3) |
| C(104) | 2912(10) | 5749(19) | 5610(15) | 16(3) |
| C(105) | 2197(11) | 5661(19) | 5477(16) | 15(2) |
| C(106) | 1741(8)  | 6139(17) | 6093(17) | 27(4) |

|        |          |           |          |       |
|--------|----------|-----------|----------|-------|
| C(107) | 1999(12) | 6706(13)  | 6842(14) | 30(4) |
| C(108) | 2714(13) | 6794(12)  | 6974(12) | 21(3) |
| C(109) | 3170(9)  | 6316(16)  | 6358(15) | 20(4) |
| C(110) | 1140(13) | 4917(16)  | 3368(17) | 30(3) |
| C(111) | 1005(13) | 4077(17)  | 4048(19) | 33(3) |
| C(112) | 3487(8)  | 4442(12)  | 3361(11) | 35(3) |
| C(113) | 4072(9)  | 4903(10)  | 2988(13) | 36(3) |
| C(114) | 4453(7)  | 4469(11)  | 2252(12) | 36(3) |
| C(115) | 4249(7)  | 3573(10)  | 1890(9)  | 36(3) |
| C(116) | 3664(8)  | 3112(9)   | 2263(12) | 36(3) |
| C(117) | 3283(7)  | 3546(12)  | 2998(12) | 36(4) |
| N(115) | 4663(9)  | 3156(13)  | 1121(12) | 33(3) |
| O(115) | 4338(12) | 2454(16)  | 1041(19) | 38(3) |
| O(116) | 5154(9)  | 3552(13)  | 822(14)  | 41(3) |
| C(118) | 3674(8)  | 4323(10)  | 5592(13) | 28(3) |
| C(119) | 4363(8)  | 4044(13)  | 5457(14) | 28(3) |
| C(120) | 4613(7)  | 3206(14)  | 5893(17) | 21(4) |
| C(121) | 4173(8)  | 2646(11)  | 6464(15) | 30(3) |
| C(122) | 3484(8)  | 2925(11)  | 6598(13) | 28(3) |
| C(123) | 3235(6)  | 3764(12)  | 6162(14) | 29(3) |
| C(131) | 3096(9)  | 10078(13) | 7210(14) | 14(4) |
| O(131) | 2590(8)  | 9484(13)  | 6805(14) | 20(3) |
| O(132) | 3607(12) | 9423(17)  | 7567(18) | 16(7) |
| C(132) | 1946(12) | 10020(30) | 6638(16) | 16(4) |
| O(133) | 3400(8)  | 10659(11) | 6514(12) | 22(3) |
| C(133) | 1621(9)  | 10241(13) | 7604(12) | 17(3) |
| C(134) | 2133(8)  | 10783(13) | 8216(13) | 20(3) |
| C(135) | 2843(9)  | 10651(15) | 8072(13) | 16(4) |
| C(136) | 3321(7)  | 11107(15) | 8674(14) | 22(4) |
| C(137) | 3088(8)  | 11696(12) | 9422(12) | 25(3) |
| C(138) | 2377(9)  | 11829(14) | 9567(13) | 27(3) |
| C(139) | 1900(7)  | 11372(15) | 8964(15) | 25(4) |
| C(140) | 4001(12) | 9201(16)  | 6622(18) | 27(5) |
| C(141) | 3893(14) | 10061(19) | 5980(20) | 41(7) |
| C(142) | 1518(8)  | 9488(12)  | 5911(11) | 27(3) |
| C(143) | 918(9)   | 9929(10)  | 5558(13) | 26(3) |

|        |         |          |          |       |
|--------|---------|----------|----------|-------|
| C(144) | 534(7)  | 9484(11) | 4832(13) | 24(2) |
| C(145) | 749(7)  | 8598(10) | 4459(11) | 26(3) |
| C(146) | 1348(8) | 8157(9)  | 4811(12) | 27(3) |
| C(147) | 1733(7) | 8602(11) | 5538(11) | 24(2) |
| N(145) | 346(11) | 8147(15) | 3712(18) | 28(3) |
| O(145) | -172(8) | 8562(12) | 3417(13) | 28(2) |
| O(146) | 579(9)  | 7396(12) | 3419(15) | 29(2) |
| C(148) | 1321(7) | 9328(9)  | 8115(11) | 17(3) |
| C(149) | 1752(6) | 8760(10) | 8690(12) | 17(4) |
| C(150) | 1490(8) | 7931(10) | 9130(12) | 17(6) |
| C(151) | 797(9)  | 7671(11) | 8995(16) | 33(6) |
| C(152) | 367(7)  | 8239(13) | 8420(17) | 22(4) |
| C(153) | 628(7)  | 9068(11) | 7980(13) | 18(4) |

---



Table 3. Bond lengths [Å] and angles [°] for JF2983FMI.

---

|              |          |
|--------------|----------|
| C(1)-O(3)    | 1.399(2) |
| C(1)-O(1)    | 1.400(3) |
| C(1)-O(2)    | 1.408(3) |
| C(1)-C(5)    | 1.503(3) |
| O(1)-C(2)    | 1.437(3) |
| C(2)-C(12)   | 1.507(3) |
| C(2)-C(3)    | 1.548(3) |
| C(2)-H(2)    | 1.0000   |
| O(2)-C(10)   | 1.441(3) |
| C(3)-C(4)    | 1.518(3) |
| C(3)-C(18)   | 1.526(3) |
| C(3)-H(3)    | 1.0000   |
| O(3)-C(11)   | 1.440(3) |
| C(4)-C(9)    | 1.393(3) |
| C(4)-C(5)    | 1.403(3) |
| C(5)-C(6)    | 1.395(3) |
| C(6)-C(7)    | 1.397(3) |
| C(6)-H(6)    | 0.9500   |
| C(7)-C(8)    | 1.392(3) |
| C(7)-H(7)    | 0.9500   |
| C(8)-C(9)    | 1.379(3) |
| C(8)-H(8)    | 0.9500   |
| C(9)-H(9)    | 0.9500   |
| C(10)-C(11)  | 1.526(3) |
| C(10)-H(10A) | 0.9900   |
| C(10)-H(10B) | 0.9900   |
| C(11)-H(11A) | 0.9900   |
| C(11)-H(11B) | 0.9900   |
| C(12)-C(17)  | 1.396(3) |
| C(12)-C(13)  | 1.396(3) |
| C(13)-C(14)  | 1.384(3) |
| C(13)-H(13)  | 0.9500   |
| C(14)-C(15)  | 1.387(3) |
| C(14)-H(14)  | 0.9500   |

|             |          |
|-------------|----------|
| C(15)-C(16) | 1.377(3) |
| C(15)-N(15) | 1.461(3) |
| N(15)-O(15) | 1.228(3) |
| N(15)-O(16) | 1.233(3) |
| C(16)-C(17) | 1.386(3) |
| C(16)-H(16) | 0.9500   |
| C(17)-H(17) | 0.9500   |
| C(18)-C(19) | 1.387(3) |
| C(18)-C(23) | 1.391(3) |
| C(19)-C(20) | 1.389(3) |
| C(19)-H(19) | 0.9500   |
| C(20)-C(21) | 1.367(4) |
| C(20)-H(20) | 0.9500   |
| C(21)-C(22) | 1.407(4) |
| C(21)-H(21) | 0.9500   |
| C(22)-C(23) | 1.383(4) |
| C(22)-H(22) | 0.9500   |
| C(23)-H(23) | 0.9500   |
| C(31)-O(33) | 1.394(3) |
| C(31)-O(32) | 1.408(3) |
| C(31)-O(31) | 1.410(3) |
| C(31)-C(35) | 1.505(4) |
| O(31)-C(32) | 1.437(2) |
| C(32)-C(42) | 1.508(3) |
| C(32)-C(33) | 1.544(3) |
| C(32)-H(32) | 1.0000   |
| O(32)-C(40) | 1.440(3) |
| C(33)-C(34) | 1.522(3) |
| C(33)-C(48) | 1.530(4) |
| C(33)-H(33) | 1.0000   |
| O(33)-C(41) | 1.441(3) |
| C(34)-C(39) | 1.392(3) |
| C(34)-C(35) | 1.398(3) |
| C(35)-C(36) | 1.396(3) |
| C(36)-C(37) | 1.383(4) |
| C(36)-H(36) | 0.9500   |

|               |          |
|---------------|----------|
| C(37)-C(38)   | 1.397(4) |
| C(37)-H(37)   | 0.9500   |
| C(38)-C(39)   | 1.384(3) |
| C(38)-H(38)   | 0.9500   |
| C(39)-H(39)   | 0.9500   |
| C(40)-C(41)   | 1.522(4) |
| C(40)-H(40A)  | 0.9900   |
| C(40)-H(40B)  | 0.9900   |
| C(41)-H(41A)  | 0.9900   |
| C(41)-H(41B)  | 0.9900   |
| C(42)-C(43)   | 1.399(3) |
| C(42)-C(47)   | 1.399(3) |
| C(43)-C(44)   | 1.381(3) |
| C(43)-H(43)   | 0.9500   |
| C(44)-C(45)   | 1.382(3) |
| C(44)-H(44)   | 0.9500   |
| C(45)-C(46)   | 1.380(3) |
| C(45)-N(45)   | 1.469(3) |
| N(45)-O(45)   | 1.227(3) |
| N(45)-O(46)   | 1.233(3) |
| C(46)-C(47)   | 1.386(3) |
| C(46)-H(46)   | 0.9500   |
| C(47)-H(47)   | 0.9500   |
| C(48)-C(53)   | 1.385(4) |
| C(48)-C(49)   | 1.391(4) |
| C(49)-C(50)   | 1.389(3) |
| C(49)-H(49)   | 0.9500   |
| C(50)-C(51)   | 1.385(3) |
| C(50)-H(50)   | 0.9500   |
| C(51)-C(52)   | 1.389(4) |
| C(51)-H(51)   | 0.9500   |
| C(52)-C(53)   | 1.393(3) |
| C(52)-H(52)   | 0.9500   |
| C(53)-H(53)   | 0.9500   |
| C(101)-O(102) | 1.40(2)  |
| C(101)-O(103) | 1.43(2)  |

|               |           |
|---------------|-----------|
| C(101)-O(101) | 1.47(2)   |
| C(101)-C(105) | 1.560(19) |
| O(101)-C(102) | 1.420(14) |
| C(102)-C(112) | 1.492(18) |
| C(102)-C(103) | 1.52(2)   |
| C(102)-H(10C) | 1.0000    |
| O(102)-C(110) | 1.452(14) |
| C(103)-C(104) | 1.44(2)   |
| C(103)-C(118) | 1.53(3)   |
| C(103)-H(103) | 1.0000    |
| O(103)-C(111) | 1.60(3)   |
| C(104)-C(105) | 1.3900    |
| C(104)-C(109) | 1.3900    |
| C(105)-C(106) | 1.3900    |
| C(106)-C(107) | 1.3900    |
| C(106)-H(106) | 0.9500    |
| C(107)-C(108) | 1.3900    |
| C(107)-H(107) | 0.9500    |
| C(108)-C(109) | 1.3900    |
| C(108)-H(108) | 0.9500    |
| C(109)-H(109) | 0.9500    |
| C(110)-C(111) | 1.52(2)   |
| C(110)-H(11C) | 0.9900    |
| C(110)-H(11D) | 0.9900    |
| C(111)-H(11E) | 0.9900    |
| C(111)-H(11F) | 0.9900    |
| C(112)-C(113) | 1.3900    |
| C(112)-C(117) | 1.3900    |
| C(113)-C(114) | 1.3900    |
| C(113)-H(113) | 0.9500    |
| C(114)-C(115) | 1.3900    |
| C(114)-H(114) | 0.9500    |
| C(115)-C(116) | 1.3900    |
| C(115)-N(115) | 1.448(16) |
| C(116)-C(117) | 1.3900    |
| C(116)-H(116) | 0.9500    |

|               |           |
|---------------|-----------|
| C(117)-H(117) | 0.9500    |
| N(115)-O(115) | 1.16(2)   |
| N(115)-O(116) | 1.165(19) |
| C(118)-C(119) | 1.3900    |
| C(118)-C(123) | 1.3900    |
| C(119)-C(120) | 1.3900    |
| C(119)-H(119) | 0.9500    |
| C(120)-C(121) | 1.3900    |
| C(120)-H(120) | 0.9500    |
| C(121)-C(122) | 1.3900    |
| C(121)-H(121) | 0.9500    |
| C(122)-C(123) | 1.3900    |
| C(122)-H(122) | 0.9500    |
| C(123)-H(123) | 0.9500    |
| C(131)-O(133) | 1.38(2)   |
| C(131)-O(131) | 1.39(2)   |
| C(131)-O(132) | 1.42(2)   |
| C(131)-C(135) | 1.511(18) |
| O(131)-C(132) | 1.46(3)   |
| O(132)-C(140) | 1.54(3)   |
| C(132)-C(142) | 1.493(18) |
| C(132)-C(133) | 1.51(2)   |
| C(132)-H(132) | 1.0000    |
| O(133)-C(141) | 1.46(3)   |
| C(133)-C(134) | 1.498(18) |
| C(133)-C(148) | 1.555(18) |
| C(133)-H(133) | 1.0000    |
| C(134)-C(135) | 1.3900    |
| C(134)-C(139) | 1.3900    |
| C(135)-C(136) | 1.3900    |
| C(136)-C(137) | 1.3900    |
| C(136)-H(136) | 0.9500    |
| C(137)-C(138) | 1.3900    |
| C(137)-H(137) | 0.9500    |
| C(138)-C(139) | 1.3900    |
| C(138)-H(138) | 0.9500    |

|                |            |
|----------------|------------|
| C(139)-H(139)  | 0.9500     |
| C(140)-C(141)  | 1.50(2)    |
| C(140)-H(14A)  | 0.9900     |
| C(140)-H(14B)  | 0.9900     |
| C(141)-H(14C)  | 0.9900     |
| C(141)-H(14D)  | 0.9900     |
| C(142)-C(143)  | 1.3900     |
| C(142)-C(147)  | 1.3900     |
| C(143)-C(144)  | 1.3900     |
| C(143)-H(143)  | 0.9500     |
| C(144)-C(145)  | 1.3900     |
| C(144)-H(144)  | 0.9500     |
| C(145)-C(146)  | 1.3900     |
| C(145)-N(145)  | 1.43(2)    |
| C(146)-C(147)  | 1.3900     |
| C(146)-H(146)  | 0.9500     |
| C(147)-H(147)  | 0.9500     |
| N(145)-O(146)  | 1.20(2)    |
| N(145)-O(145)  | 1.22(2)    |
| C(148)-C(149)  | 1.3900     |
| C(148)-C(153)  | 1.3900     |
| C(149)-C(150)  | 1.3900     |
| C(149)-H(149)  | 0.9500     |
| C(150)-C(151)  | 1.3900     |
| C(150)-H(150)  | 0.9500     |
| C(151)-C(152)  | 1.3900     |
| C(151)-H(151)  | 0.9500     |
| C(152)-C(153)  | 1.3900     |
| C(152)-H(152)  | 0.9500     |
| C(153)-H(153)  | 0.9500     |
| O(3)-C(1)-O(1) | 105.88(17) |
| O(3)-C(1)-O(2) | 105.81(16) |
| O(1)-C(1)-O(2) | 110.37(19) |
| O(3)-C(1)-C(5) | 112.73(19) |
| O(1)-C(1)-C(5) | 112.80(18) |

|                   |            |
|-------------------|------------|
| O(2)-C(1)-C(5)    | 109.01(18) |
| C(1)-O(1)-C(2)    | 111.72(17) |
| O(1)-C(2)-C(12)   | 108.46(17) |
| O(1)-C(2)-C(3)    | 108.30(17) |
| C(12)-C(2)-C(3)   | 115.40(16) |
| O(1)-C(2)-H(2)    | 108.2      |
| C(12)-C(2)-H(2)   | 108.2      |
| C(3)-C(2)-H(2)    | 108.2      |
| C(1)-O(2)-C(10)   | 106.40(16) |
| C(4)-C(3)-C(18)   | 111.9(2)   |
| C(4)-C(3)-C(2)    | 107.57(17) |
| C(18)-C(3)-C(2)   | 112.96(17) |
| C(4)-C(3)-H(3)    | 108.1      |
| C(18)-C(3)-H(3)   | 108.1      |
| C(2)-C(3)-H(3)    | 108.1      |
| C(1)-O(3)-C(11)   | 105.17(16) |
| C(9)-C(4)-C(5)    | 119.4(2)   |
| C(9)-C(4)-C(3)    | 121.2(2)   |
| C(5)-C(4)-C(3)    | 119.5(2)   |
| C(6)-C(5)-C(4)    | 119.8(2)   |
| C(6)-C(5)-C(1)    | 118.4(2)   |
| C(4)-C(5)-C(1)    | 121.7(2)   |
| C(5)-C(6)-C(7)    | 120.1(2)   |
| C(5)-C(6)-H(6)    | 119.9      |
| C(7)-C(6)-H(6)    | 119.9      |
| C(8)-C(7)-C(6)    | 119.7(2)   |
| C(8)-C(7)-H(7)    | 120.2      |
| C(6)-C(7)-H(7)    | 120.2      |
| C(9)-C(8)-C(7)    | 120.3(2)   |
| C(9)-C(8)-H(8)    | 119.9      |
| C(7)-C(8)-H(8)    | 119.9      |
| C(8)-C(9)-C(4)    | 120.7(2)   |
| C(8)-C(9)-H(9)    | 119.6      |
| C(4)-C(9)-H(9)    | 119.6      |
| O(2)-C(10)-C(11)  | 104.02(19) |
| O(2)-C(10)-H(10A) | 111.0      |

|                     |            |
|---------------------|------------|
| C(11)-C(10)-H(10A)  | 111.0      |
| O(2)-C(10)-H(10B)   | 111.0      |
| C(11)-C(10)-H(10B)  | 111.0      |
| H(10A)-C(10)-H(10B) | 109.0      |
| O(3)-C(11)-C(10)    | 104.53(17) |
| O(3)-C(11)-H(11A)   | 110.8      |
| C(10)-C(11)-H(11A)  | 110.8      |
| O(3)-C(11)-H(11B)   | 110.8      |
| C(10)-C(11)-H(11B)  | 110.8      |
| H(11A)-C(11)-H(11B) | 108.9      |
| C(17)-C(12)-C(13)   | 119.25(19) |
| C(17)-C(12)-C(2)    | 121.21(19) |
| C(13)-C(12)-C(2)    | 119.48(18) |
| C(14)-C(13)-C(12)   | 121.02(19) |
| C(14)-C(13)-H(13)   | 119.5      |
| C(12)-C(13)-H(13)   | 119.5      |
| C(13)-C(14)-C(15)   | 117.96(18) |
| C(13)-C(14)-H(14)   | 121.0      |
| C(15)-C(14)-H(14)   | 121.0      |
| C(16)-C(15)-C(14)   | 122.68(19) |
| C(16)-C(15)-N(15)   | 119.22(19) |
| C(14)-C(15)-N(15)   | 118.09(19) |
| O(15)-N(15)-O(16)   | 123.2(2)   |
| O(15)-N(15)-C(15)   | 118.3(2)   |
| O(16)-N(15)-C(15)   | 118.47(19) |
| C(15)-C(16)-C(17)   | 118.72(19) |
| C(15)-C(16)-H(16)   | 120.6      |
| C(17)-C(16)-H(16)   | 120.6      |
| C(16)-C(17)-C(12)   | 120.38(19) |
| C(16)-C(17)-H(17)   | 119.8      |
| C(12)-C(17)-H(17)   | 119.8      |
| C(19)-C(18)-C(23)   | 118.7(2)   |
| C(19)-C(18)-C(3)    | 121.4(2)   |
| C(23)-C(18)-C(3)    | 119.9(2)   |
| C(18)-C(19)-C(20)   | 120.7(2)   |
| C(18)-C(19)-H(19)   | 119.6      |



|                   |            |
|-------------------|------------|
| C(20)-C(19)-H(19) | 119.6      |
| C(21)-C(20)-C(19) | 120.3(2)   |
| C(21)-C(20)-H(20) | 119.9      |
| C(19)-C(20)-H(20) | 119.9      |
| C(20)-C(21)-C(22) | 120.0(2)   |
| C(20)-C(21)-H(21) | 120.0      |
| C(22)-C(21)-H(21) | 120.0      |
| C(23)-C(22)-C(21) | 119.2(2)   |
| C(23)-C(22)-H(22) | 120.4      |
| C(21)-C(22)-H(22) | 120.4      |
| C(22)-C(23)-C(18) | 121.1(2)   |
| C(22)-C(23)-H(23) | 119.5      |
| C(18)-C(23)-H(23) | 119.5      |
| O(33)-C(31)-O(32) | 106.14(19) |
| O(33)-C(31)-O(31) | 106.1(2)   |
| O(32)-C(31)-O(31) | 110.2(2)   |
| O(33)-C(31)-C(35) | 112.3(2)   |
| O(32)-C(31)-C(35) | 109.3(2)   |
| O(31)-C(31)-C(35) | 112.6(2)   |
| C(31)-O(31)-C(32) | 111.70(16) |
| O(31)-C(32)-C(42) | 108.90(16) |
| O(31)-C(32)-C(33) | 107.61(17) |
| C(42)-C(32)-C(33) | 116.42(17) |
| O(31)-C(32)-H(32) | 107.9      |
| C(42)-C(32)-H(32) | 107.9      |
| C(33)-C(32)-H(32) | 107.9      |
| C(31)-O(32)-C(40) | 106.57(17) |
| C(34)-C(33)-C(48) | 110.6(2)   |
| C(34)-C(33)-C(32) | 107.37(19) |
| C(48)-C(33)-C(32) | 114.12(19) |
| C(34)-C(33)-H(33) | 108.2      |
| C(48)-C(33)-H(33) | 108.2      |
| C(32)-C(33)-H(33) | 108.2      |
| C(31)-O(33)-C(41) | 105.10(18) |
| C(39)-C(34)-C(35) | 119.2(2)   |
| C(39)-C(34)-C(33) | 120.7(2)   |

|                     |            |
|---------------------|------------|
| C(35)-C(34)-C(33)   | 120.0(2)   |
| C(36)-C(35)-C(34)   | 119.8(2)   |
| C(36)-C(35)-C(31)   | 119.1(2)   |
| C(34)-C(35)-C(31)   | 121.2(2)   |
| C(37)-C(36)-C(35)   | 120.6(2)   |
| C(37)-C(36)-H(36)   | 119.7      |
| C(35)-C(36)-H(36)   | 119.7      |
| C(36)-C(37)-C(38)   | 119.8(2)   |
| C(36)-C(37)-H(37)   | 120.1      |
| C(38)-C(37)-H(37)   | 120.1      |
| C(39)-C(38)-C(37)   | 119.7(2)   |
| C(39)-C(38)-H(38)   | 120.2      |
| C(37)-C(38)-H(38)   | 120.2      |
| C(38)-C(39)-C(34)   | 121.0(2)   |
| C(38)-C(39)-H(39)   | 119.5      |
| C(34)-C(39)-H(39)   | 119.5      |
| O(32)-C(40)-C(41)   | 104.5(2)   |
| O(32)-C(40)-H(40A)  | 110.9      |
| C(41)-C(40)-H(40A)  | 110.9      |
| O(32)-C(40)-H(40B)  | 110.9      |
| C(41)-C(40)-H(40B)  | 110.9      |
| H(40A)-C(40)-H(40B) | 108.9      |
| O(33)-C(41)-C(40)   | 103.95(18) |
| O(33)-C(41)-H(41A)  | 111.0      |
| C(40)-C(41)-H(41A)  | 111.0      |
| O(33)-C(41)-H(41B)  | 111.0      |
| C(40)-C(41)-H(41B)  | 111.0      |
| H(41A)-C(41)-H(41B) | 109.0      |
| C(43)-C(42)-C(47)   | 118.7(2)   |
| C(43)-C(42)-C(32)   | 119.53(19) |
| C(47)-C(42)-C(32)   | 121.53(19) |
| C(44)-C(43)-C(42)   | 121.0(2)   |
| C(44)-C(43)-H(43)   | 119.5      |
| C(42)-C(43)-H(43)   | 119.5      |
| C(43)-C(44)-C(45)   | 118.5(2)   |
| C(43)-C(44)-H(44)   | 120.7      |

|                      |           |
|----------------------|-----------|
| C(45)-C(44)-H(44)    | 120.7     |
| C(46)-C(45)-C(44)    | 122.5(2)  |
| C(46)-C(45)-N(45)    | 119.0(2)  |
| C(44)-C(45)-N(45)    | 118.5(2)  |
| O(45)-N(45)-O(46)    | 123.1(2)  |
| O(45)-N(45)-C(45)    | 118.2(2)  |
| O(46)-N(45)-C(45)    | 118.7(2)  |
| C(45)-C(46)-C(47)    | 118.5(2)  |
| C(45)-C(46)-H(46)    | 120.8     |
| C(47)-C(46)-H(46)    | 120.8     |
| C(46)-C(47)-C(42)    | 120.8(2)  |
| C(46)-C(47)-H(47)    | 119.6     |
| C(42)-C(47)-H(47)    | 119.6     |
| C(53)-C(48)-C(49)    | 119.2(3)  |
| C(53)-C(48)-C(33)    | 120.0(3)  |
| C(49)-C(48)-C(33)    | 120.7(2)  |
| C(50)-C(49)-C(48)    | 120.5(2)  |
| C(50)-C(49)-H(49)    | 119.7     |
| C(48)-C(49)-H(49)    | 119.7     |
| C(51)-C(50)-C(49)    | 120.3(2)  |
| C(51)-C(50)-H(50)    | 119.9     |
| C(49)-C(50)-H(50)    | 119.9     |
| C(50)-C(51)-C(52)    | 119.3(2)  |
| C(50)-C(51)-H(51)    | 120.4     |
| C(52)-C(51)-H(51)    | 120.4     |
| C(51)-C(52)-C(53)    | 120.5(2)  |
| C(51)-C(52)-H(52)    | 119.8     |
| C(53)-C(52)-H(52)    | 119.8     |
| C(48)-C(53)-C(52)    | 120.2(2)  |
| C(48)-C(53)-H(53)    | 119.9     |
| C(52)-C(53)-H(53)    | 119.9     |
| O(102)-C(101)-O(103) | 114.1(16) |
| O(102)-C(101)-O(101) | 103(2)    |
| O(103)-C(101)-O(101) | 103.9(18) |
| O(102)-C(101)-C(105) | 114.4(18) |
| O(103)-C(101)-C(105) | 111.5(19) |

|                      |           |
|----------------------|-----------|
| O(101)-C(101)-C(105) | 108.5(16) |
| C(102)-O(101)-C(101) | 112.1(17) |
| O(101)-C(102)-C(112) | 109.3(18) |
| O(101)-C(102)-C(103) | 107.0(17) |
| C(112)-C(102)-C(103) | 113.0(17) |
| O(101)-C(102)-H(10C) | 109.2     |
| C(112)-C(102)-H(10C) | 109.2     |
| C(103)-C(102)-H(10C) | 109.2     |
| C(101)-O(102)-C(110) | 105.7(16) |
| C(104)-C(103)-C(102) | 109.9(17) |
| C(104)-C(103)-C(118) | 110.7(18) |
| C(102)-C(103)-C(118) | 120.2(18) |
| C(104)-C(103)-H(103) | 104.9     |
| C(102)-C(103)-H(103) | 104.9     |
| C(118)-C(103)-H(103) | 104.9     |
| C(101)-O(103)-C(111) | 97.6(16)  |
| C(105)-C(104)-C(109) | 120.0     |
| C(105)-C(104)-C(103) | 118.2(17) |
| C(109)-C(104)-C(103) | 121.5(17) |
| C(106)-C(105)-C(104) | 120.0     |
| C(106)-C(105)-C(101) | 116.7(16) |
| C(104)-C(105)-C(101) | 123.3(16) |
| C(105)-C(106)-C(107) | 120.0     |
| C(105)-C(106)-H(106) | 120.0     |
| C(107)-C(106)-H(106) | 120.0     |
| C(108)-C(107)-C(106) | 120.0     |
| C(108)-C(107)-H(107) | 120.0     |
| C(106)-C(107)-H(107) | 120.0     |
| C(107)-C(108)-C(109) | 120.0     |
| C(107)-C(108)-H(108) | 120.0     |
| C(109)-C(108)-H(108) | 120.0     |
| C(108)-C(109)-C(104) | 120.0     |
| C(108)-C(109)-H(109) | 120.0     |
| C(104)-C(109)-H(109) | 120.0     |
| O(102)-C(110)-C(111) | 105.9(17) |
| O(102)-C(110)-H(11C) | 110.6     |

|                      |           |
|----------------------|-----------|
| C(111)-C(110)-H(11C) | 110.6     |
| O(102)-C(110)-H(11D) | 110.6     |
| C(111)-C(110)-H(11D) | 110.6     |
| H(11C)-C(110)-H(11D) | 108.7     |
| C(110)-C(111)-O(103) | 106.3(15) |
| C(110)-C(111)-H(11E) | 110.5     |
| O(103)-C(111)-H(11E) | 110.5     |
| C(110)-C(111)-H(11F) | 110.5     |
| O(103)-C(111)-H(11F) | 110.5     |
| H(11E)-C(111)-H(11F) | 108.7     |
| C(113)-C(112)-C(117) | 120.0     |
| C(113)-C(112)-C(102) | 118.6(13) |
| C(117)-C(112)-C(102) | 120.8(13) |
| C(114)-C(113)-C(112) | 120.0     |
| C(114)-C(113)-H(113) | 120.0     |
| C(112)-C(113)-H(113) | 120.0     |
| C(115)-C(114)-C(113) | 120.0     |
| C(115)-C(114)-H(114) | 120.0     |
| C(113)-C(114)-H(114) | 120.0     |
| C(114)-C(115)-C(116) | 120.0     |
| C(114)-C(115)-N(115) | 117.6(10) |
| C(116)-C(115)-N(115) | 122.4(10) |
| C(115)-C(116)-C(117) | 120.0     |
| C(115)-C(116)-H(116) | 120.0     |
| C(117)-C(116)-H(116) | 120.0     |
| C(116)-C(117)-C(112) | 120.0     |
| C(116)-C(117)-H(117) | 120.0     |
| C(112)-C(117)-H(117) | 120.0     |
| O(115)-N(115)-O(116) | 143(2)    |
| O(115)-N(115)-C(115) | 96.1(19)  |
| O(116)-N(115)-C(115) | 121.3(18) |
| C(119)-C(118)-C(123) | 120.0     |
| C(119)-C(118)-C(103) | 120.4(13) |
| C(123)-C(118)-C(103) | 119.1(13) |
| C(118)-C(119)-C(120) | 120.0     |
| C(118)-C(119)-H(119) | 120.0     |

|                      |           |
|----------------------|-----------|
| C(120)-C(119)-H(119) | 120.0     |
| C(121)-C(120)-C(119) | 120.0     |
| C(121)-C(120)-H(120) | 120.0     |
| C(119)-C(120)-H(120) | 120.0     |
| C(120)-C(121)-C(122) | 120.0     |
| C(120)-C(121)-H(121) | 120.0     |
| C(122)-C(121)-H(121) | 120.0     |
| C(123)-C(122)-C(121) | 120.0     |
| C(123)-C(122)-H(122) | 120.0     |
| C(121)-C(122)-H(122) | 120.0     |
| C(122)-C(123)-C(118) | 120.0     |
| C(122)-C(123)-H(123) | 120.0     |
| C(118)-C(123)-H(123) | 120.0     |
| O(133)-C(131)-O(131) | 110.9(16) |
| O(133)-C(131)-O(132) | 108.6(16) |
| O(131)-C(131)-O(132) | 104.4(17) |
| O(133)-C(131)-C(135) | 112.5(16) |
| O(131)-C(131)-C(135) | 113.8(15) |
| O(132)-C(131)-C(135) | 106.2(18) |
| C(131)-O(131)-C(132) | 110.9(17) |
| C(131)-O(132)-C(140) | 99.7(17)  |
| O(131)-C(132)-C(142) | 109(2)    |
| O(131)-C(132)-C(133) | 108.2(18) |
| C(142)-C(132)-C(133) | 118.0(18) |
| O(131)-C(132)-H(132) | 107.0     |
| C(142)-C(132)-H(132) | 107.0     |
| C(133)-C(132)-H(132) | 107.0     |
| C(131)-O(133)-C(141) | 107.4(14) |
| C(134)-C(133)-C(132) | 109.4(14) |
| C(134)-C(133)-C(148) | 113.0(14) |
| C(132)-C(133)-C(148) | 113.1(18) |
| C(134)-C(133)-H(133) | 107.0     |
| C(132)-C(133)-H(133) | 107.0     |
| C(148)-C(133)-H(133) | 107.0     |
| C(135)-C(134)-C(139) | 120.0     |
| C(135)-C(134)-C(133) | 119.8(13) |

|                      |           |
|----------------------|-----------|
| C(139)-C(134)-C(133) | 120.1(13) |
| C(136)-C(135)-C(134) | 120.0     |
| C(136)-C(135)-C(131) | 120.0(12) |
| C(134)-C(135)-C(131) | 119.8(12) |
| C(135)-C(136)-C(137) | 120.0     |
| C(135)-C(136)-H(136) | 120.0     |
| C(137)-C(136)-H(136) | 120.0     |
| C(138)-C(137)-C(136) | 120.0     |
| C(138)-C(137)-H(137) | 120.0     |
| C(136)-C(137)-H(137) | 120.0     |
| C(139)-C(138)-C(137) | 120.0     |
| C(139)-C(138)-H(138) | 120.0     |
| C(137)-C(138)-H(138) | 120.0     |
| C(138)-C(139)-C(134) | 120.0     |
| C(138)-C(139)-H(139) | 120.0     |
| C(134)-C(139)-H(139) | 120.0     |
| C(141)-C(140)-O(132) | 106.1(16) |
| C(141)-C(140)-H(14A) | 110.5     |
| O(132)-C(140)-H(14A) | 110.5     |
| C(141)-C(140)-H(14B) | 110.5     |
| O(132)-C(140)-H(14B) | 110.5     |
| H(14A)-C(140)-H(14B) | 108.7     |
| O(133)-C(141)-C(140) | 103.9(16) |
| O(133)-C(141)-H(14C) | 111.0     |
| C(140)-C(141)-H(14C) | 111.0     |
| O(133)-C(141)-H(14D) | 111.0     |
| C(140)-C(141)-H(14D) | 111.0     |
| H(14C)-C(141)-H(14D) | 109.0     |
| C(143)-C(142)-C(147) | 120.0     |
| C(143)-C(142)-C(132) | 118.6(16) |
| C(147)-C(142)-C(132) | 121.3(16) |
| C(142)-C(143)-C(144) | 120.0     |
| C(142)-C(143)-H(143) | 120.0     |
| C(144)-C(143)-H(143) | 120.0     |
| C(143)-C(144)-C(145) | 120.0     |
| C(143)-C(144)-H(144) | 120.0     |

|                      |           |
|----------------------|-----------|
| C(145)-C(144)-H(144) | 120.0     |
| C(146)-C(145)-C(144) | 120.0     |
| C(146)-C(145)-N(145) | 120.7(12) |
| C(144)-C(145)-N(145) | 119.3(12) |
| C(147)-C(146)-C(145) | 120.0     |
| C(147)-C(146)-H(146) | 120.0     |
| C(145)-C(146)-H(146) | 120.0     |
| C(146)-C(147)-C(142) | 120.0     |
| C(146)-C(147)-H(147) | 120.0     |
| C(142)-C(147)-H(147) | 120.0     |
| O(146)-N(145)-O(145) | 127(2)    |
| O(146)-N(145)-C(145) | 114.6(18) |
| O(145)-N(145)-C(145) | 118.6(18) |
| C(149)-C(148)-C(153) | 120.0     |
| C(149)-C(148)-C(133) | 119.8(11) |
| C(153)-C(148)-C(133) | 120.2(11) |
| C(148)-C(149)-C(150) | 120.0     |
| C(148)-C(149)-H(149) | 120.0     |
| C(150)-C(149)-H(149) | 120.0     |
| C(151)-C(150)-C(149) | 120.0     |
| C(151)-C(150)-H(150) | 120.0     |
| C(149)-C(150)-H(150) | 120.0     |
| C(152)-C(151)-C(150) | 120.0     |
| C(152)-C(151)-H(151) | 120.0     |
| C(150)-C(151)-H(151) | 120.0     |
| C(151)-C(152)-C(153) | 120.0     |
| C(151)-C(152)-H(152) | 120.0     |
| C(153)-C(152)-H(152) | 120.0     |
| C(152)-C(153)-C(148) | 120.0     |
| C(152)-C(153)-H(153) | 120.0     |
| C(148)-C(153)-H(153) | 120.0     |

---

Symmetry transformations used to generate equivalent atoms:



Table 4. Anisotropic displacement parameters ( $\text{\AA}^2 \times 10^3$ ) for JF2983FMI. The anisotropic displacement factor exponent takes the form:  $-2\pi^2 [ h^2 a^{*2}U^{11} + \dots + 2 h k a^* b^* U^{12} ]$

|       | U <sup>11</sup> | U <sup>22</sup> | U <sup>33</sup> | U <sup>23</sup> | U <sup>13</sup> | U <sup>12</sup> |
|-------|-----------------|-----------------|-----------------|-----------------|-----------------|-----------------|
| C(1)  | 14(1)           | 17(1)           | 11(1)           | 0(1)            | -3(1)           | -2(1)           |
| O(1)  | 12(1)           | 17(1)           | 16(1)           | -1(1)           | -1(1)           | 1(1)            |
| C(2)  | 13(1)           | 13(1)           | 13(1)           | -1(1)           | -1(1)           | 1(1)            |
| O(2)  | 16(1)           | 17(1)           | 15(1)           | 0(1)            | 3(1)            | -1(1)           |
| C(3)  | 14(1)           | 14(1)           | 10(1)           | -1(1)           | 2(1)            | 2(1)            |
| O(3)  | 16(1)           | 21(1)           | 15(1)           | -1(1)           | -1(1)           | 4(1)            |
| C(4)  | 19(1)           | 14(1)           | 13(1)           | 1(1)            | 1(1)            | -1(1)           |
| C(5)  | 20(1)           | 13(1)           | 12(1)           | 2(1)            | -3(1)           | -1(1)           |
| C(6)  | 19(1)           | 16(1)           | 14(1)           | -2(1)           | 1(1)            | 0(1)            |
| C(7)  | 22(1)           | 18(1)           | 12(1)           | -2(1)           | -1(1)           | -3(1)           |
| C(8)  | 20(1)           | 16(1)           | 14(1)           | -1(1)           | 1(1)            | -3(1)           |
| C(9)  | 21(1)           | 13(1)           | 13(1)           | -3(1)           | -1(1)           | -2(1)           |
| C(10) | 26(1)           | 27(1)           | 21(1)           | -3(1)           | 7(1)            | 3(1)            |
| C(11) | 20(1)           | 26(1)           | 17(1)           | -2(1)           | 2(1)            | 5(1)            |
| C(12) | 18(1)           | 14(1)           | 11(1)           | 0(1)            | 2(1)            | -3(1)           |
| C(13) | 15(1)           | 16(1)           | 14(1)           | -3(1)           | 1(1)            | 1(1)            |
| C(14) | 12(1)           | 19(1)           | 14(1)           | 1(1)            | 0(1)            | 0(1)            |
| C(15) | 16(1)           | 16(1)           | 10(1)           | -1(1)           | 2(1)            | -5(1)           |
| N(15) | 18(1)           | 22(1)           | 13(1)           | -2(1)           | 1(1)            | -4(1)           |
| O(15) | 19(1)           | 29(1)           | 21(1)           | -5(1)           | -6(1)           | 2(1)            |
| C(16) | 21(1)           | 14(1)           | 17(1)           | -2(1)           | -1(1)           | 0(1)            |
| O(16) | 24(1)           | 22(1)           | 24(1)           | -9(1)           | -3(1)           | -1(1)           |
| C(17) | 18(1)           | 16(1)           | 18(1)           | 2(1)            | -3(1)           | 2(1)            |
| C(18) | 21(1)           | 16(1)           | 11(1)           | -6(1)           | 6(1)            | 0(1)            |
| C(19) | 21(1)           | 14(1)           | 18(1)           | 0(1)            | 2(1)            | 1(1)            |
| C(20) | 34(1)           | 16(1)           | 31(1)           | 5(1)            | 9(1)            | 2(1)            |
| C(21) | 38(2)           | 18(1)           | 51(2)           | 2(1)            | 15(1)           | -7(1)           |
| C(22) | 22(1)           | 26(1)           | 42(2)           | -3(1)           | 8(1)            | -6(1)           |
| C(23) | 19(1)           | 21(1)           | 29(1)           | -3(1)           | 2(1)            | 1(1)            |
| C(31) | 14(1)           | 18(1)           | 20(1)           | 5(1)            | 2(1)            | 3(1)            |
| O(31) | 14(1)           | 15(1)           | 19(1)           | 2(1)            | 1(1)            | -1(1)           |

|       |       |       |       |       |       |       |
|-------|-------|-------|-------|-------|-------|-------|
| C(32) | 13(1) | 14(1) | 16(1) | 3(1)  | 0(1)  | -1(1) |
| O(32) | 19(1) | 21(1) | 21(1) | 6(1)  | -3(1) | 3(1)  |
| C(33) | 14(1) | 15(1) | 15(1) | 2(1)  | 0(1)  | -1(1) |
| O(33) | 16(1) | 24(1) | 18(1) | 2(1)  | 1(1)  | -4(1) |
| C(34) | 21(1) | 13(1) | 16(1) | 5(1)  | 3(1)  | 1(1)  |
| C(35) | 20(1) | 13(1) | 20(1) | 4(1)  | 2(1)  | 1(1)  |
| C(36) | 20(1) | 18(1) | 22(1) | 4(1)  | 3(1)  | 2(1)  |
| C(37) | 31(1) | 17(1) | 23(1) | 3(1)  | 11(1) | 5(1)  |
| C(38) | 32(1) | 15(1) | 22(1) | 0(1)  | 4(1)  | -1(1) |
| C(39) | 24(1) | 14(1) | 21(1) | 2(1)  | 2(1)  | -2(1) |
| C(40) | 26(1) | 30(1) | 24(1) | -1(1) | -6(1) | 2(1)  |
| C(41) | 20(1) | 36(1) | 23(1) | -1(1) | -2(1) | -9(1) |
| C(42) | 16(1) | 16(1) | 15(1) | 5(1)  | -3(1) | 3(1)  |
| C(43) | 15(1) | 16(1) | 17(1) | 2(1)  | -2(1) | 0(1)  |
| C(44) | 13(1) | 22(1) | 19(1) | 5(1)  | -2(1) | -2(1) |
| C(45) | 17(1) | 18(1) | 17(1) | 1(1)  | -1(1) | 4(1)  |
| N(45) | 19(1) | 21(1) | 21(1) | -1(1) | 1(1)  | 4(1)  |
| O(45) | 18(1) | 31(1) | 30(1) | -4(1) | 8(1)  | -3(1) |
| C(46) | 18(1) | 16(1) | 22(1) | 0(1)  | -2(1) | -2(1) |
| O(46) | 31(1) | 22(1) | 32(1) | -7(1) | 7(1)  | -1(1) |
| C(47) | 16(1) | 16(1) | 22(1) | 4(1)  | -1(1) | -1(1) |
| C(48) | 20(1) | 14(1) | 16(2) | -1(1) | -3(1) | 1(1)  |
| C(49) | 20(1) | 15(1) | 17(1) | -1(1) | 0(1)  | 0(1)  |
| C(50) | 28(1) | 15(1) | 15(1) | 0(1)  | -2(1) | -2(1) |
| C(51) | 29(1) | 16(1) | 17(1) | 1(1)  | -8(1) | 1(1)  |
| C(52) | 19(1) | 22(1) | 32(1) | 0(1)  | -5(1) | 2(1)  |
| C(53) | 18(1) | 20(1) | 24(1) | 3(1)  | -1(1) | -2(1) |

---

Table 5. Hydrogen coordinates ( $\times 10^4$ ) and isotropic displacement parameters ( $\text{\AA}^2 \times 10^{-3}$ ) for JF2983FMI.

|        | x    | y     | z    | U(eq) |
|--------|------|-------|------|-------|
| H(2)   | 2109 | 5691  | 3659 | 16    |
| H(3)   | 1209 | 5707  | 4806 | 15    |
| H(6)   | 3812 | 6038  | 5876 | 19    |
| H(7)   | 3429 | 7018  | 7157 | 21    |
| H(8)   | 2234 | 7230  | 7421 | 20    |
| H(9)   | 1427 | 6455  | 6438 | 19    |
| H(10A) | 4332 | 5486  | 3213 | 30    |
| H(10B) | 3690 | 4948  | 2688 | 30    |
| H(11A) | 3835 | 3643  | 3620 | 25    |
| H(11B) | 4518 | 4143  | 4075 | 25    |
| H(13)  | 786  | 5561  | 3099 | 18    |
| H(14)  | 131  | 4798  | 1891 | 18    |
| H(16)  | 1491 | 2544  | 1904 | 21    |
| H(17)  | 2149 | 3316  | 3104 | 21    |
| H(19)  | 2209 | 3935  | 6091 | 21    |
| H(20)  | 1773 | 2503  | 6750 | 32    |
| H(21)  | 626  | 2057  | 6487 | 43    |
| H(22)  | -95  | 3025  | 5496 | 36    |
| H(23)  | 341  | 4464  | 4856 | 28    |
| H(32)  | 2887 | 10561 | 6012 | 17    |
| H(33)  | 3773 | 10614 | 7182 | 18    |
| H(36)  | 1147 | 10934 | 8147 | 24    |
| H(37)  | 1492 | 11910 | 9435 | 28    |
| H(38)  | 2683 | 12119 | 9768 | 27    |
| H(39)  | 3513 | 11354 | 8807 | 24    |
| H(40A) | 1283 | 9757  | 5001 | 32    |
| H(40B) | 649  | 10275 | 5560 | 32    |
| H(41A) | 507  | 8903  | 6393 | 32    |
| H(41B) | 1218 | 8459  | 5961 | 32    |
| H(43)  | 4243 | 10452 | 5518 | 19    |

|        |      |       |       |    |
|--------|------|-------|-------|----|
| H(44)  | 4894 | 9748  | 4279  | 22 |
| H(46)  | 3538 | 7494  | 4179  | 23 |
| H(47)  | 2875 | 8215  | 5403  | 21 |
| H(49)  | 2741 | 8867  | 8451  | 21 |
| H(50)  | 3184 | 7552  | 9315  | 23 |
| H(51)  | 4369 | 7172  | 9228  | 25 |
| H(52)  | 5098 | 8079  | 8218  | 29 |
| H(53)  | 4653 | 9389  | 7342  | 25 |
| H(10C) | 2901 | 5625  | 3741  | 40 |
| H(103) | 3774 | 5601  | 4870  | 33 |
| H(106) | 1252 | 6078  | 6002  | 32 |
| H(107) | 1686 | 7032  | 7263  | 36 |
| H(108) | 2890 | 7182  | 7486  | 25 |
| H(109) | 3659 | 6377  | 6449  | 24 |
| H(11C) | 1362 | 4686  | 2766  | 36 |
| H(11D) | 699  | 5248  | 3201  | 36 |
| H(11E) | 1194 | 3468  | 3776  | 40 |
| H(11F) | 499  | 3995  | 4156  | 40 |
| H(113) | 4211 | 5515  | 3236  | 43 |
| H(114) | 4852 | 4784  | 1997  | 44 |
| H(116) | 3525 | 2500  | 2015  | 43 |
| H(117) | 2883 | 3231  | 3253  | 43 |
| H(119) | 4664 | 4427  | 5067  | 34 |
| H(120) | 5083 | 3015  | 5801  | 25 |
| H(121) | 4343 | 2073  | 6762  | 36 |
| H(122) | 3184 | 2543  | 6988  | 33 |
| H(123) | 2764 | 3955  | 6254  | 34 |
| H(132) | 2079 | 10654 | 6340  | 19 |
| H(133) | 1221 | 10689 | 7482  | 21 |
| H(136) | 3806 | 11016 | 8575  | 26 |
| H(137) | 3414 | 12008 | 9834  | 30 |
| H(138) | 2218 | 12231 | 10078 | 32 |
| H(139) | 1415 | 11463 | 9063  | 29 |
| H(14A) | 4504 | 9104  | 6752  | 32 |
| H(14B) | 3814 | 8608  | 6314  | 32 |
| H(14C) | 4336 | 10412 | 5874  | 49 |

|        |      |       |      |    |
|--------|------|-------|------|----|
| H(14D) | 3698 | 9864  | 5350 | 49 |
| H(143) | 771  | 10535 | 5813 | 31 |
| H(144) | 125  | 9785  | 4591 | 28 |
| H(146) | 1495 | 7551  | 4556 | 32 |
| H(147) | 2142 | 8301  | 5779 | 29 |
| H(149) | 2225 | 8939  | 8783 | 20 |
| H(150) | 1784 | 7543  | 9523 | 21 |
| H(151) | 618  | 7104  | 9296 | 40 |
| H(152) | -107 | 8060  | 8327 | 26 |
| H(153) | 334  | 9456  | 7587 | 22 |

---

Table 6. Torsion angles [°] for JF2983FMI.

---

|                       |             |
|-----------------------|-------------|
| O(3)-C(1)-O(1)-C(2)   | 171.70(17)  |
| O(2)-C(1)-O(1)-C(2)   | -74.2(2)    |
| C(5)-C(1)-O(1)-C(2)   | 48.0(3)     |
| C(1)-O(1)-C(2)-C(12)  | 161.94(18)  |
| C(1)-O(1)-C(2)-C(3)   | -72.1(2)    |
| O(3)-C(1)-O(2)-C(10)  | 35.2(2)     |
| O(1)-C(1)-O(2)-C(10)  | -79.0(2)    |
| C(5)-C(1)-O(2)-C(10)  | 156.63(19)  |
| O(1)-C(2)-C(3)-C(4)   | 56.8(2)     |
| C(12)-C(2)-C(3)-C(4)  | 178.52(18)  |
| O(1)-C(2)-C(3)-C(18)  | -67.2(2)    |
| C(12)-C(2)-C(3)-C(18) | 54.5(2)     |
| O(1)-C(1)-O(3)-C(11)  | 79.0(2)     |
| O(2)-C(1)-O(3)-C(11)  | -38.2(2)    |
| C(5)-C(1)-O(3)-C(11)  | -157.21(18) |
| C(18)-C(3)-C(4)-C(9)  | -80.0(3)    |
| C(2)-C(3)-C(4)-C(9)   | 155.3(2)    |
| C(18)-C(3)-C(4)-C(5)  | 100.2(2)    |
| C(2)-C(3)-C(4)-C(5)   | -24.5(3)    |
| C(9)-C(4)-C(5)-C(6)   | 0.6(3)      |
| C(3)-C(4)-C(5)-C(6)   | -179.6(3)   |
| C(9)-C(4)-C(5)-C(1)   | -176.3(3)   |
| C(3)-C(4)-C(5)-C(1)   | 3.5(3)      |
| O(3)-C(1)-C(5)-C(6)   | 49.7(3)     |
| O(1)-C(1)-C(5)-C(6)   | 169.5(2)    |
| O(2)-C(1)-C(5)-C(6)   | -67.5(3)    |
| O(3)-C(1)-C(5)-C(4)   | -133.5(2)   |
| O(1)-C(1)-C(5)-C(4)   | -13.6(3)    |
| O(2)-C(1)-C(5)-C(4)   | 109.4(2)    |
| C(4)-C(5)-C(6)-C(7)   | 0.1(3)      |
| C(1)-C(5)-C(6)-C(7)   | 177.0(2)    |
| C(5)-C(6)-C(7)-C(8)   | -0.6(3)     |
| C(6)-C(7)-C(8)-C(9)   | 0.6(3)      |
| C(7)-C(8)-C(9)-C(4)   | 0.0(3)      |

|                         |             |
|-------------------------|-------------|
| C(5)-C(4)-C(9)-C(8)     | -0.6(3)     |
| C(3)-C(4)-C(9)-C(8)     | 179.6(2)    |
| C(1)-O(2)-C(10)-C(11)   | -17.8(2)    |
| C(1)-O(3)-C(11)-C(10)   | 25.8(2)     |
| O(2)-C(10)-C(11)-O(3)   | -4.8(2)     |
| O(1)-C(2)-C(12)-C(17)   | 2.8(3)      |
| C(3)-C(2)-C(12)-C(17)   | -118.9(2)   |
| O(1)-C(2)-C(12)-C(13)   | -174.48(18) |
| C(3)-C(2)-C(12)-C(13)   | 63.9(2)     |
| C(17)-C(12)-C(13)-C(14) | -0.8(3)     |
| C(2)-C(12)-C(13)-C(14)  | 176.57(18)  |
| C(12)-C(13)-C(14)-C(15) | 0.8(3)      |
| C(13)-C(14)-C(15)-C(16) | -0.6(3)     |
| C(13)-C(14)-C(15)-N(15) | -179.21(19) |
| C(16)-C(15)-N(15)-O(15) | -178.9(2)   |
| C(14)-C(15)-N(15)-O(15) | -0.2(3)     |
| C(16)-C(15)-N(15)-O(16) | 0.0(3)      |
| C(14)-C(15)-N(15)-O(16) | 178.71(19)  |
| C(14)-C(15)-C(16)-C(17) | 0.4(3)      |
| N(15)-C(15)-C(16)-C(17) | 178.96(19)  |
| C(15)-C(16)-C(17)-C(12) | -0.3(3)     |
| C(13)-C(12)-C(17)-C(16) | 0.5(3)      |
| C(2)-C(12)-C(17)-C(16)  | -176.78(19) |
| C(4)-C(3)-C(18)-C(19)   | -36.6(3)    |
| C(2)-C(3)-C(18)-C(19)   | 85.0(3)     |
| C(4)-C(3)-C(18)-C(23)   | 145.5(2)    |
| C(2)-C(3)-C(18)-C(23)   | -92.9(2)    |
| C(23)-C(18)-C(19)-C(20) | 0.4(3)      |
| C(3)-C(18)-C(19)-C(20)  | -177.4(2)   |
| C(18)-C(19)-C(20)-C(21) | -0.6(4)     |
| C(19)-C(20)-C(21)-C(22) | 1.1(4)      |
| C(20)-C(21)-C(22)-C(23) | -1.5(4)     |
| C(21)-C(22)-C(23)-C(18) | 1.4(4)      |
| C(19)-C(18)-C(23)-C(22) | -0.9(4)     |
| C(3)-C(18)-C(23)-C(22)  | 177.0(2)    |
| O(33)-C(31)-O(31)-C(32) | -171.34(17) |

|                         |             |
|-------------------------|-------------|
| O(32)-C(31)-O(31)-C(32) | 74.2(2)     |
| C(35)-C(31)-O(31)-C(32) | -48.1(3)    |
| C(31)-O(31)-C(32)-C(42) | -159.93(18) |
| C(31)-O(31)-C(32)-C(33) | 73.0(2)     |
| O(33)-C(31)-O(32)-C(40) | -32.5(3)    |
| O(31)-C(31)-O(32)-C(40) | 81.9(2)     |
| C(35)-C(31)-O(32)-C(40) | -153.85(19) |
| O(31)-C(32)-C(33)-C(34) | -57.3(2)    |
| C(42)-C(32)-C(33)-C(34) | -179.84(17) |
| O(31)-C(32)-C(33)-C(48) | 65.7(2)     |
| C(42)-C(32)-C(33)-C(48) | -56.8(3)    |
| O(32)-C(31)-O(33)-C(41) | 38.4(2)     |
| O(31)-C(31)-O(33)-C(41) | -78.8(2)    |
| C(35)-C(31)-O(33)-C(41) | 157.8(2)    |
| C(48)-C(33)-C(34)-C(39) | 77.6(3)     |
| C(32)-C(33)-C(34)-C(39) | -157.3(2)   |
| C(48)-C(33)-C(34)-C(35) | -100.8(3)   |
| C(32)-C(33)-C(34)-C(35) | 24.3(3)     |
| C(39)-C(34)-C(35)-C(36) | 0.9(3)      |
| C(33)-C(34)-C(35)-C(36) | 179.2(2)    |
| C(39)-C(34)-C(35)-C(31) | 179.3(2)    |
| C(33)-C(34)-C(35)-C(31) | -2.3(3)     |
| O(33)-C(31)-C(35)-C(36) | -49.4(3)    |
| O(32)-C(31)-C(35)-C(36) | 68.1(3)     |
| O(31)-C(31)-C(35)-C(36) | -169.09(19) |
| O(33)-C(31)-C(35)-C(34) | 132.2(2)    |
| O(32)-C(31)-C(35)-C(34) | -110.3(2)   |
| O(31)-C(31)-C(35)-C(34) | 12.5(3)     |
| C(34)-C(35)-C(36)-C(37) | -1.0(3)     |
| C(31)-C(35)-C(36)-C(37) | -179.4(2)   |
| C(35)-C(36)-C(37)-C(38) | 0.4(3)      |
| C(36)-C(37)-C(38)-C(39) | 0.2(3)      |
| C(37)-C(38)-C(39)-C(34) | -0.3(3)     |
| C(35)-C(34)-C(39)-C(38) | -0.2(3)     |
| C(33)-C(34)-C(39)-C(38) | -178.6(2)   |
| C(31)-O(32)-C(40)-C(41) | 13.7(3)     |



|                             |             |
|-----------------------------|-------------|
| C(31)-O(33)-C(41)-C(40)     | -28.5(2)    |
| O(32)-C(40)-C(41)-O(33)     | 8.9(2)      |
| O(31)-C(32)-C(42)-C(43)     | 175.84(18)  |
| C(33)-C(32)-C(42)-C(43)     | -62.3(3)    |
| O(31)-C(32)-C(42)-C(47)     | 1.0(3)      |
| C(33)-C(32)-C(42)-C(47)     | 122.8(2)    |
| C(47)-C(42)-C(43)-C(44)     | 1.1(3)      |
| C(32)-C(42)-C(43)-C(44)     | -173.87(19) |
| C(42)-C(43)-C(44)-C(45)     | -0.6(3)     |
| C(43)-C(44)-C(45)-C(46)     | -0.6(3)     |
| C(43)-C(44)-C(45)-N(45)     | 177.31(19)  |
| C(46)-C(45)-N(45)-O(45)     | -178.7(2)   |
| C(44)-C(45)-N(45)-O(45)     | 3.3(3)      |
| C(46)-C(45)-N(45)-O(46)     | 2.5(3)      |
| C(44)-C(45)-N(45)-O(46)     | -175.5(2)   |
| C(44)-C(45)-C(46)-C(47)     | 1.1(3)      |
| N(45)-C(45)-C(46)-C(47)     | -176.7(2)   |
| C(45)-C(46)-C(47)-C(42)     | -0.6(3)     |
| C(43)-C(42)-C(47)-C(46)     | -0.5(3)     |
| C(32)-C(42)-C(47)-C(46)     | 174.4(2)    |
| C(34)-C(33)-C(48)-C(53)     | -142.3(3)   |
| C(32)-C(33)-C(48)-C(53)     | 96.5(3)     |
| C(34)-C(33)-C(48)-C(49)     | 35.4(3)     |
| C(32)-C(33)-C(48)-C(49)     | -85.8(3)    |
| C(53)-C(48)-C(49)-C(50)     | 0.9(4)      |
| C(33)-C(48)-C(49)-C(50)     | -176.8(2)   |
| C(48)-C(49)-C(50)-C(51)     | 0.4(3)      |
| C(49)-C(50)-C(51)-C(52)     | -1.4(3)     |
| C(50)-C(51)-C(52)-C(53)     | 1.1(4)      |
| C(49)-C(48)-C(53)-C(52)     | -1.2(4)     |
| C(33)-C(48)-C(53)-C(52)     | 176.5(2)    |
| C(51)-C(52)-C(53)-C(48)     | 0.2(4)      |
| O(102)-C(101)-O(101)-C(102) | 77(2)       |
| O(103)-C(101)-O(101)-C(102) | -163(2)     |
| C(105)-C(101)-O(101)-C(102) | -44(3)      |
| C(101)-O(101)-C(102)-C(112) | -165(2)     |

|                             |            |
|-----------------------------|------------|
| C(101)-O(101)-C(102)-C(103) | 72(3)      |
| O(103)-C(101)-O(102)-C(110) | -33(3)     |
| O(101)-C(101)-O(102)-C(110) | 79(2)      |
| C(105)-C(101)-O(102)-C(110) | -163.0(19) |
| O(101)-C(102)-C(103)-C(104) | -63(3)     |
| C(112)-C(102)-C(103)-C(104) | 177(2)     |
| O(101)-C(102)-C(103)-C(118) | 67(2)      |
| C(112)-C(102)-C(103)-C(118) | -53(2)     |
| O(102)-C(101)-O(103)-C(111) | 33(2)      |
| O(101)-C(101)-O(103)-C(111) | -79(2)     |
| C(105)-C(101)-O(103)-C(111) | 164.4(18)  |
| C(102)-C(103)-C(104)-C(105) | 30(2)      |
| C(118)-C(103)-C(104)-C(105) | -105.0(17) |
| C(102)-C(103)-C(104)-C(109) | -155.6(17) |
| C(118)-C(103)-C(104)-C(109) | 69(2)      |
| C(109)-C(104)-C(105)-C(106) | 0.0        |
| C(103)-C(104)-C(105)-C(106) | 174(2)     |
| C(109)-C(104)-C(105)-C(101) | -180(2)    |
| C(103)-C(104)-C(105)-C(101) | -5(2)      |
| O(102)-C(101)-C(105)-C(106) | 76(2)      |
| O(103)-C(101)-C(105)-C(106) | -55(2)     |
| O(101)-C(101)-C(105)-C(106) | -169.0(17) |
| O(102)-C(101)-C(105)-C(104) | -104(2)    |
| O(103)-C(101)-C(105)-C(104) | 124.6(18)  |
| O(101)-C(101)-C(105)-C(104) | 11(3)      |
| C(104)-C(105)-C(106)-C(107) | 0.0        |
| C(101)-C(105)-C(106)-C(107) | 180(2)     |
| C(105)-C(106)-C(107)-C(108) | 0.0        |
| C(106)-C(107)-C(108)-C(109) | 0.0        |
| C(107)-C(108)-C(109)-C(104) | 0.0        |
| C(105)-C(104)-C(109)-C(108) | 0.0        |
| C(103)-C(104)-C(109)-C(108) | -174(2)    |
| C(101)-O(102)-C(110)-C(111) | 15(3)      |
| O(102)-C(110)-C(111)-O(103) | 4(3)       |
| C(101)-O(103)-C(111)-C(110) | -21(2)     |
| O(101)-C(102)-C(112)-C(113) | 171.1(16)  |

|                             |            |
|-----------------------------|------------|
| C(103)-C(102)-C(112)-C(113) | -70(2)     |
| O(101)-C(102)-C(112)-C(117) | 0(3)       |
| C(103)-C(102)-C(112)-C(117) | 119.4(17)  |
| C(117)-C(112)-C(113)-C(114) | 0.0        |
| C(102)-C(112)-C(113)-C(114) | -170.8(15) |
| C(112)-C(113)-C(114)-C(115) | 0.0        |
| C(113)-C(114)-C(115)-C(116) | 0.0        |
| C(113)-C(114)-C(115)-N(115) | 179.7(4)   |
| C(114)-C(115)-C(116)-C(117) | 0.0        |
| N(115)-C(115)-C(116)-C(117) | -179.7(4)  |
| C(115)-C(116)-C(117)-C(112) | 0.0        |
| C(113)-C(112)-C(117)-C(116) | 0.0        |
| C(102)-C(112)-C(117)-C(116) | 170.6(16)  |
| C(114)-C(115)-N(115)-O(115) | 179.6(5)   |
| C(116)-C(115)-N(115)-O(115) | -0.7(8)    |
| C(114)-C(115)-N(115)-O(116) | 0.7(10)    |
| C(116)-C(115)-N(115)-O(116) | -179.6(7)  |
| C(104)-C(103)-C(118)-C(119) | -141.0(17) |
| C(102)-C(103)-C(118)-C(119) | 89(2)      |
| C(104)-C(103)-C(118)-C(123) | 47(2)      |
| C(102)-C(103)-C(118)-C(123) | -83.0(19)  |
| C(123)-C(118)-C(119)-C(120) | 0.0        |
| C(103)-C(118)-C(119)-C(120) | -172.1(17) |
| C(118)-C(119)-C(120)-C(121) | 0.0        |
| C(119)-C(120)-C(121)-C(122) | 0.0        |
| C(120)-C(121)-C(122)-C(123) | 0.0        |
| C(121)-C(122)-C(123)-C(118) | 0.0        |
| C(119)-C(118)-C(123)-C(122) | 0.0        |
| C(103)-C(118)-C(123)-C(122) | 172.2(17)  |
| O(133)-C(131)-O(131)-C(132) | -78(2)     |
| O(132)-C(131)-O(131)-C(132) | 164.7(19)  |
| C(135)-C(131)-O(131)-C(132) | 49(2)      |
| O(133)-C(131)-O(132)-C(140) | -38(2)     |
| O(131)-C(131)-O(132)-C(140) | 80(2)      |
| C(135)-C(131)-O(132)-C(140) | -159.0(17) |
| C(131)-O(131)-C(132)-C(142) | 160.3(19)  |

|                             |            |
|-----------------------------|------------|
| C(131)-O(131)-C(132)-C(133) | -70(2)     |
| O(131)-C(131)-O(133)-C(141) | -78(2)     |
| O(132)-C(131)-O(133)-C(141) | 36(2)      |
| C(135)-C(131)-O(133)-C(141) | 153.7(18)  |
| O(131)-C(132)-C(133)-C(134) | 56(3)      |
| C(142)-C(132)-C(133)-C(134) | -179(2)    |
| O(131)-C(132)-C(133)-C(148) | -71(2)     |
| C(142)-C(132)-C(133)-C(148) | 54(3)      |
| C(132)-C(133)-C(134)-C(135) | -28(2)     |
| C(148)-C(133)-C(134)-C(135) | 99.3(16)   |
| C(132)-C(133)-C(134)-C(139) | 156.1(19)  |
| C(148)-C(133)-C(134)-C(139) | -76.9(18)  |
| C(139)-C(134)-C(135)-C(136) | 0.0        |
| C(133)-C(134)-C(135)-C(136) | -176.2(17) |
| C(139)-C(134)-C(135)-C(131) | -175(2)    |
| C(133)-C(134)-C(135)-C(131) | 9(2)       |
| O(133)-C(131)-C(135)-C(136) | -66.9(19)  |
| O(131)-C(131)-C(135)-C(136) | 166.0(14)  |
| O(132)-C(131)-C(135)-C(136) | 52(2)      |
| O(133)-C(131)-C(135)-C(134) | 108.0(17)  |
| O(131)-C(131)-C(135)-C(134) | -19(2)     |
| O(132)-C(131)-C(135)-C(134) | -133.3(17) |
| C(134)-C(135)-C(136)-C(137) | 0.0        |
| C(131)-C(135)-C(136)-C(137) | 175(2)     |
| C(135)-C(136)-C(137)-C(138) | 0.0        |
| C(136)-C(137)-C(138)-C(139) | 0.0        |
| C(137)-C(138)-C(139)-C(134) | 0.0        |
| C(135)-C(134)-C(139)-C(138) | 0.0        |
| C(133)-C(134)-C(139)-C(138) | 176.2(17)  |
| C(131)-O(132)-C(140)-C(141) | 26(3)      |
| C(131)-O(133)-C(141)-C(140) | -17(3)     |
| O(132)-C(140)-C(141)-O(133) | -6(3)      |
| O(131)-C(132)-C(142)-C(143) | -172.5(15) |
| C(133)-C(132)-C(142)-C(143) | 64(3)      |
| O(131)-C(132)-C(142)-C(147) | 3(3)       |
| C(133)-C(132)-C(142)-C(147) | -121(2)    |

|                             |            |
|-----------------------------|------------|
| C(147)-C(142)-C(143)-C(144) | 0.0        |
| C(132)-C(142)-C(143)-C(144) | 175.5(19)  |
| C(142)-C(143)-C(144)-C(145) | 0.0        |
| C(143)-C(144)-C(145)-C(146) | 0.0        |
| C(143)-C(144)-C(145)-N(145) | 179.8(18)  |
| C(144)-C(145)-C(146)-C(147) | 0.0        |
| N(145)-C(145)-C(146)-C(147) | -179.8(19) |
| C(145)-C(146)-C(147)-C(142) | 0.0        |
| C(143)-C(142)-C(147)-C(146) | 0.0        |
| C(132)-C(142)-C(147)-C(146) | -175(2)    |
| C(146)-C(145)-N(145)-O(146) | -2(3)      |
| C(144)-C(145)-N(145)-O(146) | 178.4(18)  |
| C(146)-C(145)-N(145)-O(145) | -179.3(19) |
| C(144)-C(145)-N(145)-O(145) | 1(3)       |
| C(134)-C(133)-C(148)-C(149) | -38.3(18)  |
| C(132)-C(133)-C(148)-C(149) | 86.6(17)   |
| C(134)-C(133)-C(148)-C(153) | 143.2(14)  |
| C(132)-C(133)-C(148)-C(153) | -91.9(17)  |
| C(153)-C(148)-C(149)-C(150) | 0.0        |
| C(133)-C(148)-C(149)-C(150) | -178.5(15) |
| C(148)-C(149)-C(150)-C(151) | 0.0        |
| C(149)-C(150)-C(151)-C(152) | 0.0        |
| C(150)-C(151)-C(152)-C(153) | 0.0        |
| C(151)-C(152)-C(153)-C(148) | 0.0        |
| C(149)-C(148)-C(153)-C(152) | 0.0        |
| C(133)-C(148)-C(153)-C(152) | 178.5(15)  |

---

Symmetry transformations used to generate equivalent atoms:

Table 7. Hydrogen bonds for JF2983FMI [ $\text{\AA}$  and  $^\circ$ ].

| D-H...A                                                                   | d(D-H) | d(H...A) | d(D...A) | $\angle(\text{DHA})$ |
|---------------------------------------------------------------------------|--------|----------|----------|----------------------|
| C(3 <sup>^a</sup> )-H(3 <sup>^a</sup> )...O(15 <sup>^a</sup> )#1          | 1.00   | 2.60     | 3.412(3) | 138.8                |
| C(33 <sup>^a</sup> )-H(33 <sup>^a</sup> )...O(45 <sup>^a</sup> )#2        | 1.00   | 2.59     | 3.432(3) | 142.2                |
| C(46 <sup>^a</sup> )-H(46 <sup>^a</sup> )...O(2 <sup>^a</sup> )           | 0.95   | 2.52     | 3.441(3) | 162.4                |
| C(133 <sup>^b</sup> )-H(133 <sup>^b</sup> )...O(145 <sup>^b</sup> )#31.00 |        | 2.61     | 3.42(2)  | 138.9                |

Symmetry transformations used to generate equivalent atoms:

#1  $-x, -y+1, z+1/2$  #2  $-x+1, -y+2, z+1/2$  #3  $-x, -y+2, z+1/2$

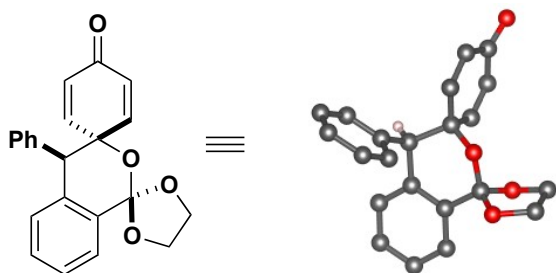

CCDC 2087129

Table 1. Crystal data and structure refinement for  $[\text{C}_{22}\text{H}_{18}\text{O}_4]$ .

|                        |                                                |                       |
|------------------------|------------------------------------------------|-----------------------|
| Identification code    | JF2998FMI                                      | (MG-4-175)            |
| Empirical formula      | $\text{C}_{22}\text{H}_{18}\text{O}_4$         |                       |
| Formula weight         | 346.36                                         |                       |
| Temperature            | 100(2) K                                       |                       |
| Wavelength             | 0.71073 $\text{\AA}$                           |                       |
| Crystal system         | Orthorhombic                                   |                       |
| Space group            | Pbca                                           |                       |
| Unit cell dimensions   | $a = 9.7117(6) \text{\AA}$                     | $\angle = 90^\circ$ . |
|                        | $b = 17.1656(11) \text{\AA}$                   | $\angle = 90^\circ$ . |
|                        | $c = 19.8546(13) \text{\AA}$                   | $\angle = 90^\circ$ . |
| Volume                 | $3309.9(4) \text{\AA}^3$                       |                       |
| Z                      | 8                                              |                       |
| Density (calculated)   | $1.390 \text{ Mg/m}^3$                         |                       |
| Absorption coefficient | $0.095 \text{ mm}^{-1}$                        |                       |
| F(000)                 | 1456                                           |                       |
| Crystal size           | $0.395 \times 0.170 \times 0.150 \text{ mm}^3$ |                       |

|                                      |                                                                             |
|--------------------------------------|-----------------------------------------------------------------------------|
| Crystal color and habit              | Yellow Block                                                                |
| Diffractometer                       | Bruker Photon100 CMOS                                                       |
| Theta range for data collection      | 2.051 to 27.496°.                                                           |
| Index ranges                         | -12<=h<=12, -22<=k<=22, -25<=l<=25                                          |
| Reflections collected                | 28507                                                                       |
| Independent reflections              | 3807 [R(int) = 0.0282]                                                      |
| Observed reflections (I > 2sigma(I)) | 3347                                                                        |
| Completeness to theta = 25.242°      | 100.0 %                                                                     |
| Absorption correction                | Semi-empirical from equivalents                                             |
| Max. and min. transmission           | 0.9873 and 0.9155                                                           |
| Solution method                      | SHELXT (Sheldrick, 2014)                                                    |
| Refinement method                    | SHELXL-2017/1 (Sheldrick, 2017) Full-matrix least-squares on F <sup>2</sup> |
| Data / restraints / parameters       | 3807 / 0 / 308                                                              |
| Goodness-of-fit on F <sup>2</sup>    | 1.041                                                                       |
| Final R indices [I>2sigma(I)]        | R1 = 0.0417, wR2 = 0.1076                                                   |
| R indices (all data)                 | R1 = 0.0476, wR2 = 0.1131                                                   |
| Extinction coefficient               | 0.0115(9)                                                                   |
| Largest diff. peak and hole          | 0.383 and -0.324 e.Å <sup>-3</sup>                                          |

Table 2. Atomic coordinates ( $\times 10^4$ ) and equivalent isotropic displacement parameters ( $\text{\AA}^2 \times 10^3$ ) for JF2998FMI.  $U(\text{eq})$  is defined as one third of the trace of the orthogonalized  $U^{ij}$  tensor.

|       | x       | y       | z       | $U(\text{eq})$ |
|-------|---------|---------|---------|----------------|
| C(1)  | 2203(1) | 5023(1) | 5957(1) | 19(1)          |
| O(1)  | 3628(1) | 5102(1) | 5816(1) | 19(1)          |
| C(2)  | 4572(1) | 4861(1) | 6343(1) | 19(1)          |
| O(2)  | 1559(1) | 5088(1) | 5329(1) | 21(1)          |
| C(3)  | 4387(1) | 3972(1) | 6477(1) | 19(1)          |
| O(3)  | 1715(1) | 5642(1) | 6351(1) | 21(1)          |
| C(4)  | 2867(1) | 3778(1) | 6555(1) | 18(1)          |
| C(5)  | 1848(1) | 4266(1) | 6303(1) | 18(1)          |
| C(6)  | 1256(2) | 5904(1) | 5225(1) | 27(1)          |
| C(7)  | 1557(2) | 6290(1) | 5899(1) | 26(1)          |
| C(8)  | 4310(1) | 5302(1) | 6990(1) | 21(1)          |
| C(9)  | 5180(2) | 5816(1) | 7249(1) | 23(1)          |
| C(10) | 6485(2) | 6012(1) | 6912(1) | 25(1)          |
| O(10) | 7226(1) | 6546(1) | 7110(1) | 36(1)          |
| C(11) | 6843(1) | 5548(1) | 6311(1) | 24(1)          |
| C(12) | 5961(1) | 5041(1) | 6043(1) | 22(1)          |
| C(13) | 5033(1) | 3446(1) | 5948(1) | 18(1)          |
| C(14) | 6084(1) | 2935(1) | 6131(1) | 21(1)          |
| C(15) | 6666(1) | 2436(1) | 5658(1) | 24(1)          |
| C(16) | 6213(1) | 2441(1) | 4997(1) | 24(1)          |
| C(17) | 5171(1) | 2952(1) | 4810(1) | 24(1)          |
| C(18) | 4575(1) | 3447(1) | 5281(1) | 22(1)          |
| C(19) | 2482(1) | 3080(1) | 6870(1) | 22(1)          |
| C(20) | 1107(2) | 2879(1) | 6929(1) | 25(1)          |
| C(21) | 89(1)   | 3376(1) | 6683(1) | 25(1)          |
| C(22) | 458(1)  | 4070(1) | 6375(1) | 22(1)          |



Table 3. Bond lengths [Å] and angles [°] for JF2998FMI.

---

|             |            |
|-------------|------------|
| C(1)-O(2)   | 1.3983(15) |
| C(1)-O(3)   | 1.4016(15) |
| C(1)-O(1)   | 1.4178(15) |
| C(1)-C(5)   | 1.5106(17) |
| O(1)-C(2)   | 1.4509(15) |
| C(2)-C(12)  | 1.5065(18) |
| C(2)-C(8)   | 1.5123(17) |
| C(2)-C(3)   | 1.5602(17) |
| O(2)-C(6)   | 1.4475(16) |
| C(3)-C(13)  | 1.5209(17) |
| C(3)-C(4)   | 1.5209(17) |
| C(3)-H(3)   | 0.971(16)  |
| O(3)-C(7)   | 1.4371(16) |
| C(4)-C(5)   | 1.3898(18) |
| C(4)-C(19)  | 1.4023(18) |
| C(5)-C(22)  | 1.3981(18) |
| C(6)-C(7)   | 1.521(2)   |
| C(6)-H(6A)  | 0.968(19)  |
| C(6)-H(6B)  | 1.00(2)    |
| C(7)-H(7A)  | 0.987(19)  |
| C(7)-H(7B)  | 0.96(2)    |
| C(8)-C(9)   | 1.3265(19) |
| C(8)-H(8)   | 0.967(18)  |
| C(9)-C(10)  | 1.472(2)   |
| C(9)-H(9)   | 0.962(18)  |
| C(10)-O(10) | 1.2293(17) |
| C(10)-C(11) | 1.475(2)   |
| C(11)-C(12) | 1.3327(19) |
| C(11)-H(11) | 0.967(17)  |
| C(12)-H(12) | 0.960(18)  |
| C(13)-C(14) | 1.3928(17) |
| C(13)-C(18) | 1.3977(18) |
| C(14)-C(15) | 1.3910(19) |
| C(14)-H(14) | 0.959(17)  |

|             |            |
|-------------|------------|
| C(15)-C(16) | 1.385(2)   |
| C(15)-H(15) | 0.969(19)  |
| C(16)-C(17) | 1.3895(19) |
| C(16)-H(16) | 0.941(16)  |
| C(17)-C(18) | 1.3890(19) |
| C(17)-H(17) | 0.957(17)  |
| C(18)-H(18) | 0.967(18)  |
| C(19)-C(20) | 1.384(2)   |
| C(19)-H(19) | 0.966(17)  |
| C(20)-C(21) | 1.394(2)   |
| C(20)-H(20) | 0.968(17)  |
| C(21)-C(22) | 1.3858(19) |
| C(21)-H(21) | 0.95(2)    |
| C(22)-H(22) | 0.970(17)  |

|                 |            |
|-----------------|------------|
| O(2)-C(1)-O(3)  | 106.65(10) |
| O(2)-C(1)-O(1)  | 104.72(10) |
| O(3)-C(1)-O(1)  | 111.53(10) |
| O(2)-C(1)-C(5)  | 111.78(10) |
| O(3)-C(1)-C(5)  | 108.70(10) |
| O(1)-C(1)-C(5)  | 113.24(10) |
| C(1)-O(1)-C(2)  | 116.63(9)  |
| O(1)-C(2)-C(12) | 102.82(10) |
| O(1)-C(2)-C(8)  | 111.31(10) |
| C(12)-C(2)-C(8) | 112.67(11) |
| O(1)-C(2)-C(3)  | 109.16(10) |
| C(12)-C(2)-C(3) | 111.78(10) |
| C(8)-C(2)-C(3)  | 108.96(10) |
| C(1)-O(2)-C(6)  | 107.16(10) |
| C(13)-C(3)-C(4) | 109.97(10) |
| C(13)-C(3)-C(2) | 114.61(10) |
| C(4)-C(3)-C(2)  | 110.09(10) |
| C(13)-C(3)-H(3) | 108.5(9)   |
| C(4)-C(3)-H(3)  | 107.8(9)   |
| C(2)-C(3)-H(3)  | 105.6(9)   |
| C(1)-O(3)-C(7)  | 105.86(10) |

|                   |            |
|-------------------|------------|
| C(5)-C(4)-C(19)   | 119.05(12) |
| C(5)-C(4)-C(3)    | 121.50(11) |
| C(19)-C(4)-C(3)   | 119.42(11) |
| C(4)-C(5)-C(22)   | 120.34(12) |
| C(4)-C(5)-C(1)    | 121.31(11) |
| C(22)-C(5)-C(1)   | 118.34(11) |
| O(2)-C(6)-C(7)    | 104.82(11) |
| O(2)-C(6)-H(6A)   | 107.2(11)  |
| C(7)-C(6)-H(6A)   | 112.3(11)  |
| O(2)-C(6)-H(6B)   | 108.3(11)  |
| C(7)-C(6)-H(6B)   | 110.6(11)  |
| H(6A)-C(6)-H(6B)  | 113.1(15)  |
| O(3)-C(7)-C(6)    | 103.51(11) |
| O(3)-C(7)-H(7A)   | 107.5(10)  |
| C(6)-C(7)-H(7A)   | 113.6(10)  |
| O(3)-C(7)-H(7B)   | 108.7(12)  |
| C(6)-C(7)-H(7B)   | 114.4(12)  |
| H(7A)-C(7)-H(7B)  | 108.8(15)  |
| C(9)-C(8)-C(2)    | 123.63(13) |
| C(9)-C(8)-H(8)    | 119.5(10)  |
| C(2)-C(8)-H(8)    | 116.9(10)  |
| C(8)-C(9)-C(10)   | 121.66(13) |
| C(8)-C(9)-H(9)    | 122.9(10)  |
| C(10)-C(9)-H(9)   | 115.4(10)  |
| O(10)-C(10)-C(9)  | 121.88(14) |
| O(10)-C(10)-C(11) | 121.50(14) |
| C(9)-C(10)-C(11)  | 116.59(12) |
| C(12)-C(11)-C(10) | 121.60(13) |
| C(12)-C(11)-H(11) | 122.6(10)  |
| C(10)-C(11)-H(11) | 115.8(10)  |
| C(11)-C(12)-C(2)  | 123.43(13) |
| C(11)-C(12)-H(12) | 120.5(11)  |
| C(2)-C(12)-H(12)  | 116.0(11)  |
| C(14)-C(13)-C(18) | 118.76(12) |
| C(14)-C(13)-C(3)  | 119.78(11) |
| C(18)-C(13)-C(3)  | 121.45(11) |

|                   |            |
|-------------------|------------|
| C(15)-C(14)-C(13) | 120.65(12) |
| C(15)-C(14)-H(14) | 120.6(10)  |
| C(13)-C(14)-H(14) | 118.7(10)  |
| C(16)-C(15)-C(14) | 120.43(12) |
| C(16)-C(15)-H(15) | 120.7(10)  |
| C(14)-C(15)-H(15) | 118.9(10)  |
| C(15)-C(16)-C(17) | 119.22(12) |
| C(15)-C(16)-H(16) | 121.6(10)  |
| C(17)-C(16)-H(16) | 119.2(10)  |
| C(18)-C(17)-C(16) | 120.69(13) |
| C(18)-C(17)-H(17) | 118.8(10)  |
| C(16)-C(17)-H(17) | 120.5(10)  |
| C(17)-C(18)-C(13) | 120.25(12) |
| C(17)-C(18)-H(18) | 119.5(10)  |
| C(13)-C(18)-H(18) | 120.2(10)  |
| C(20)-C(19)-C(4)  | 120.53(12) |
| C(20)-C(19)-H(19) | 119.2(10)  |
| C(4)-C(19)-H(19)  | 120.2(10)  |
| C(19)-C(20)-C(21) | 120.12(12) |
| C(19)-C(20)-H(20) | 118.5(10)  |
| C(21)-C(20)-H(20) | 121.3(10)  |
| C(22)-C(21)-C(20) | 119.81(13) |
| C(22)-C(21)-H(21) | 119.8(11)  |
| C(20)-C(21)-H(21) | 120.4(11)  |
| C(21)-C(22)-C(5)  | 120.12(13) |
| C(21)-C(22)-H(22) | 120.9(10)  |
| C(5)-C(22)-H(22)  | 119.0(10)  |

---

Symmetry transformations used to generate equivalent atoms:

Table 4. Anisotropic displacement parameters ( $\text{\AA}^2 \times 10^3$ ) for JF2998FMI. The anisotropic displacement factor exponent takes the form:  $-2\pi^2 [ h^2 a^* U^{11} + \dots + 2 h k a^* b^* U^{12} ]$

|       | U <sup>11</sup> | U <sup>22</sup> | U <sup>33</sup> | U <sup>23</sup> | U <sup>13</sup> | U <sup>12</sup> |
|-------|-----------------|-----------------|-----------------|-----------------|-----------------|-----------------|
| C(1)  | 18(1)           | 20(1)           | 18(1)           | -2(1)           | 0(1)            | 0(1)            |
| O(1)  | 19(1)           | 20(1)           | 18(1)           | 1(1)            | 0(1)            | 0(1)            |
| C(2)  | 18(1)           | 19(1)           | 20(1)           | -1(1)           | -1(1)           | 0(1)            |
| O(2)  | 25(1)           | 20(1)           | 19(1)           | 0(1)            | -4(1)           | 2(1)            |
| C(3)  | 20(1)           | 19(1)           | 17(1)           | 0(1)            | -2(1)           | 0(1)            |
| O(3)  | 24(1)           | 18(1)           | 20(1)           | -2(1)           | 2(1)            | 3(1)            |
| C(4)  | 22(1)           | 18(1)           | 15(1)           | -3(1)           | 1(1)            | 0(1)            |
| C(5)  | 21(1)           | 19(1)           | 16(1)           | -2(1)           | 1(1)            | 0(1)            |
| C(6)  | 33(1)           | 21(1)           | 27(1)           | 3(1)            | -5(1)           | 2(1)            |
| C(7)  | 31(1)           | 20(1)           | 28(1)           | 0(1)            | -1(1)           | 4(1)            |
| C(8)  | 23(1)           | 20(1)           | 20(1)           | 0(1)            | -2(1)           | 3(1)            |
| C(9)  | 30(1)           | 19(1)           | 21(1)           | -1(1)           | -6(1)           | 2(1)            |
| C(10) | 29(1)           | 20(1)           | 27(1)           | 5(1)            | -11(1)          | -2(1)           |
| O(10) | 44(1)           | 28(1)           | 36(1)           | 2(1)            | -11(1)          | -14(1)          |
| C(11) | 21(1)           | 20(1)           | 33(1)           | 5(1)            | -3(1)           | 0(1)            |
| C(12) | 21(1)           | 19(1)           | 25(1)           | 2(1)            | 1(1)            | 2(1)            |
| C(13) | 18(1)           | 16(1)           | 21(1)           | -1(1)           | 0(1)            | -2(1)           |
| C(14) | 20(1)           | 21(1)           | 22(1)           | 2(1)            | -1(1)           | 0(1)            |
| C(15) | 22(1)           | 20(1)           | 31(1)           | 4(1)            | 4(1)            | 3(1)            |
| C(16) | 23(1)           | 19(1)           | 29(1)           | -4(1)           | 6(1)            | -2(1)           |
| C(17) | 24(1)           | 27(1)           | 21(1)           | -4(1)           | 0(1)            | -1(1)           |
| C(18) | 21(1)           | 23(1)           | 23(1)           | -2(1)           | -2(1)           | 2(1)            |
| C(19) | 29(1)           | 20(1)           | 17(1)           | -1(1)           | 0(1)            | 0(1)            |
| C(20) | 33(1)           | 22(1)           | 19(1)           | -1(1)           | 4(1)            | -7(1)           |
| C(21) | 24(1)           | 29(1)           | 21(1)           | -3(1)           | 3(1)            | -7(1)           |
| C(22) | 22(1)           | 26(1)           | 19(1)           | -3(1)           | 1(1)            | -1(1)           |

Table 5. Hydrogen coordinates ( $\times 10^4$ ) and isotropic displacement parameters ( $\text{\AA}^2 \times 10^{-3}$ ) for JF2998FMI.

|       | x        | y        | z        | U(eq) |
|-------|----------|----------|----------|-------|
| H(3)  | 4833(16) | 3873(9)  | 6906(8)  | 18(4) |
| H(6A) | 290(20)  | 5942(11) | 5101(9)  | 35(5) |
| H(6B) | 1890(20) | 6107(11) | 4870(10) | 41(5) |
| H(7A) | 2428(19) | 6586(10) | 5905(9)  | 30(4) |
| H(7B) | 830(20)  | 6619(11) | 6064(10) | 38(5) |
| H(8)  | 3470(18) | 5179(9)  | 7230(9)  | 24(4) |
| H(9)  | 4997(17) | 6097(10) | 7658(9)  | 28(4) |
| H(11) | 7741(17) | 5649(9)  | 6119(8)  | 22(4) |
| H(12) | 6175(18) | 4780(10) | 5628(9)  | 28(4) |
| H(14) | 6396(17) | 2933(10) | 6589(9)  | 26(4) |
| H(15) | 7383(19) | 2080(11) | 5801(9)  | 32(4) |
| H(16) | 6591(16) | 2105(9)  | 4671(8)  | 21(4) |
| H(17) | 4845(17) | 2966(10) | 4356(9)  | 27(4) |
| H(18) | 3838(18) | 3791(10) | 5144(8)  | 27(4) |
| H(19) | 3175(17) | 2736(9)  | 7052(8)  | 21(4) |
| H(20) | 876(17)  | 2388(10) | 7141(8)  | 26(4) |
| H(21) | -850(20) | 3244(11) | 6729(9)  | 36(5) |
| H(22) | -238(17) | 4426(10) | 6208(9)  | 25(4) |

Table 6. Torsion angles [°] for JF2998FMI.

---

|                       |             |
|-----------------------|-------------|
| O(2)-C(1)-O(1)-C(2)   | -164.55(9)  |
| O(3)-C(1)-O(1)-C(2)   | 80.47(12)   |
| C(5)-C(1)-O(1)-C(2)   | -42.52(14)  |
| C(1)-O(1)-C(2)-C(12)  | -178.44(10) |
| C(1)-O(1)-C(2)-C(8)   | -57.58(14)  |
| C(1)-O(1)-C(2)-C(3)   | 62.74(13)   |
| O(3)-C(1)-O(2)-C(6)   | 28.17(13)   |
| O(1)-C(1)-O(2)-C(6)   | -90.17(11)  |
| C(5)-C(1)-O(2)-C(6)   | 146.85(11)  |
| O(1)-C(2)-C(3)-C(13)  | 76.28(13)   |
| C(12)-C(2)-C(3)-C(13) | -36.79(15)  |
| C(8)-C(2)-C(3)-C(13)  | -161.97(10) |
| O(1)-C(2)-C(3)-C(4)   | -48.31(13)  |
| C(12)-C(2)-C(3)-C(4)  | -161.37(10) |
| C(8)-C(2)-C(3)-C(4)   | 73.44(12)   |
| O(2)-C(1)-O(3)-C(7)   | -36.21(13)  |
| O(1)-C(1)-O(3)-C(7)   | 77.57(12)   |
| C(5)-C(1)-O(3)-C(7)   | -156.89(10) |
| C(13)-C(3)-C(4)-C(5)  | -106.29(13) |
| C(2)-C(3)-C(4)-C(5)   | 20.92(16)   |
| C(13)-C(3)-C(4)-C(19) | 71.67(14)   |
| C(2)-C(3)-C(4)-C(19)  | -161.12(11) |
| C(19)-C(4)-C(5)-C(22) | 1.31(18)    |
| C(3)-C(4)-C(5)-C(22)  | 179.27(11)  |
| C(19)-C(4)-C(5)-C(1)  | -179.79(11) |
| C(3)-C(4)-C(5)-C(1)   | -1.83(18)   |
| O(2)-C(1)-C(5)-C(4)   | 128.56(12)  |
| O(3)-C(1)-C(5)-C(4)   | -113.98(12) |
| O(1)-C(1)-C(5)-C(4)   | 10.56(16)   |
| O(2)-C(1)-C(5)-C(22)  | -52.51(15)  |
| O(3)-C(1)-C(5)-C(22)  | 64.95(14)   |
| O(1)-C(1)-C(5)-C(22)  | -170.51(11) |
| C(1)-O(2)-C(6)-C(7)   | -9.49(14)   |
| C(1)-O(3)-C(7)-C(6)   | 28.81(14)   |

|                         |             |
|-------------------------|-------------|
| O(2)-C(6)-C(7)-O(3)     | -11.73(14)  |
| O(1)-C(2)-C(8)-C(9)     | -112.00(14) |
| C(12)-C(2)-C(8)-C(9)    | 2.90(18)    |
| C(3)-C(2)-C(8)-C(9)     | 127.56(13)  |
| C(2)-C(8)-C(9)-C(10)    | 1.0(2)      |
| C(8)-C(9)-C(10)-O(10)   | 172.12(13)  |
| C(8)-C(9)-C(10)-C(11)   | -6.15(19)   |
| O(10)-C(10)-C(11)-C(12) | -170.83(13) |
| C(9)-C(10)-C(11)-C(12)  | 7.44(19)    |
| C(10)-C(11)-C(12)-C(2)  | -3.6(2)     |
| O(1)-C(2)-C(12)-C(11)   | 118.36(13)  |
| C(8)-C(2)-C(12)-C(11)   | -1.57(18)   |
| C(3)-C(2)-C(12)-C(11)   | -124.68(13) |
| C(4)-C(3)-C(13)-C(14)   | -117.53(12) |
| C(2)-C(3)-C(13)-C(14)   | 117.82(13)  |
| C(4)-C(3)-C(13)-C(18)   | 60.93(15)   |
| C(2)-C(3)-C(13)-C(18)   | -63.72(16)  |
| C(18)-C(13)-C(14)-C(15) | -0.10(19)   |
| C(3)-C(13)-C(14)-C(15)  | 178.41(12)  |
| C(13)-C(14)-C(15)-C(16) | 0.4(2)      |
| C(14)-C(15)-C(16)-C(17) | 0.0(2)      |
| C(15)-C(16)-C(17)-C(18) | -0.7(2)     |
| C(16)-C(17)-C(18)-C(13) | 1.0(2)      |
| C(14)-C(13)-C(18)-C(17) | -0.55(19)   |
| C(3)-C(13)-C(18)-C(17)  | -179.03(12) |
| C(5)-C(4)-C(19)-C(20)   | 0.00(18)    |
| C(3)-C(4)-C(19)-C(20)   | -178.00(11) |
| C(4)-C(19)-C(20)-C(21)  | -0.88(19)   |
| C(19)-C(20)-C(21)-C(22) | 0.5(2)      |
| C(20)-C(21)-C(22)-C(5)  | 0.85(19)    |
| C(4)-C(5)-C(22)-C(21)   | -1.74(19)   |
| C(1)-C(5)-C(22)-C(21)   | 179.32(11)  |



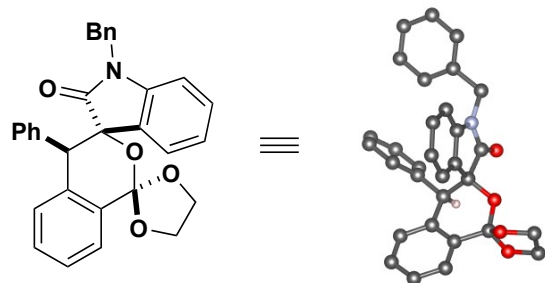

CCDC 2087130

Table 1. Crystal data and structure refinement for [C<sub>31</sub>H<sub>25</sub>NO<sub>4</sub>].

|                                  |                                                                                                           |
|----------------------------------|-----------------------------------------------------------------------------------------------------------|
| Identification code              | JF2999FMI (MG-4-165)                                                                                      |
| Empirical formula                | C <sub>31</sub> H <sub>25</sub> N O <sub>4</sub>                                                          |
| Formula weight                   | 475.52                                                                                                    |
| Temperature                      | 90(2) K                                                                                                   |
| Wavelength                       | 1.54178 Å                                                                                                 |
| Crystal system                   | Triclinic                                                                                                 |
| Space group                      | P-1                                                                                                       |
| Unit cell dimensions             | a = 10.2681(8) Å (= 75.214(3)°.<br>b = 13.4445(10) Å ® = 78.879(3)°.<br>c = 18.5225(14) Å © = 68.820(2)°. |
| Volume                           | 2290.9(3) Å <sup>3</sup>                                                                                  |
| Z, Z'                            | 4, 2                                                                                                      |
| Density (calculated)             | 1.379 Mg/m <sup>3</sup>                                                                                   |
| Absorption coefficient           | 0.732 mm <sup>-1</sup>                                                                                    |
| F(000)                           | 1000                                                                                                      |
| Crystal size                     | 0.271 x 0.184 x 0.056 mm <sup>3</sup>                                                                     |
| Crystal color and habit          | Pale Yellow Block                                                                                         |
| Diffractometer                   | Bruker Duo APEXII CCD                                                                                     |
| Theta range for data collection  | 2.483 to 67.903°.                                                                                         |
| Index ranges                     | -12 ≤ h ≤ 12, -16 ≤ k ≤ 16, -22 ≤ l ≤ 22                                                                  |
| Reflections collected            | 14547                                                                                                     |
| Independent reflections          | 7860 [R(int) = 0.0144]                                                                                    |
| Observed reflections (I > 2σ(I)) | 7357                                                                                                      |
| Completeness to theta = 67.679°  | 94.3 %                                                                                                    |
| Absorption correction            | Semi-empirical from equivalents                                                                           |
| Max. and min. transmission       | 0.9126 and 0.8432                                                                                         |
| Solution method                  | SHELXT (Sheldrick, 2014)                                                                                  |

|                                   |                                                                             |
|-----------------------------------|-----------------------------------------------------------------------------|
| Refinement method                 | SHELXL-2017/1 (Sheldrick, 2017) Full-matrix least-squares on F <sup>2</sup> |
| Data / restraints / parameters    | 7860 / 0 / 850                                                              |
| Goodness-of-fit on F <sup>2</sup> | 1.045                                                                       |
| Final R indices [I>2sigma(I)]     | R1 = 0.0328, wR2 = 0.0875                                                   |
| R indices (all data)              | R1 = 0.0347, wR2 = 0.0893                                                   |
| Extinction coefficient            | 0.00103(12)                                                                 |
| Largest diff. peak and hole       | 0.228 and -0.248 e.Å <sup>-3</sup>                                          |

Table 2. Atomic coordinates ( $\times 10^4$ ) and equivalent isotropic displacement parameters ( $\text{\AA}^2 \times 10^3$ ) for JF2999FMI.  $U(\text{eq})$  is defined as one third of the trace of the orthogonalized  $U^{ij}$  tensor.

|       | x        | y        | z       | $U(\text{eq})$ |
|-------|----------|----------|---------|----------------|
| C(1)  | 3219(1)  | 8214(1)  | 3208(1) | 18(1)          |
| O(1)  | 2960(1)  | 8386(1)  | 2447(1) | 21(1)          |
| C(2)  | 1630(1)  | 9102(1)  | 2240(1) | 19(1)          |
| O(2)  | 1759(1)  | 10110(1) | 1843(1) | 23(1)          |
| C(3)  | 484(1)   | 9278(1)  | 2888(1) | 20(1)          |
| O(3)  | 1291(1)  | 8658(1)  | 1721(1) | 23(1)          |
| C(4)  | 684(1)   | 8627(1)  | 3605(1) | 19(1)          |
| C(5)  | 2098(1)  | 7740(1)  | 3713(1) | 18(1)          |
| C(6)  | 4707(1)  | 7354(1)  | 3265(1) | 19(1)          |
| N(6)  | 5461(1)  | 7734(1)  | 3596(1) | 19(1)          |
| O(6)  | 5113(1)  | 6489(1)  | 3062(1) | 24(1)          |
| C(7)  | 4707(1)  | 8806(1)  | 3692(1) | 19(1)          |
| C(8)  | 3379(1)  | 9158(1)  | 3449(1) | 19(1)          |
| C(9)  | 2390(2)  | 9935(1)  | 1105(1) | 31(1)          |
| C(10) | 1755(2)  | 9146(1)  | 981(1)  | 36(1)          |
| C(11) | -771(1)  | 10127(1) | 2762(1) | 23(1)          |
| C(12) | -1834(1) | 10335(1) | 3348(1) | 25(1)          |
| C(13) | -1636(1) | 9695(1)  | 4062(1) | 24(1)          |
| C(14) | -395(1)  | 8841(1)  | 4189(1) | 22(1)          |
| C(15) | 2432(1)  | 7242(1)  | 4515(1) | 19(1)          |
| C(16) | 2266(1)  | 7862(1)  | 5050(1) | 21(1)          |
| C(17) | 2617(1)  | 7353(1)  | 5772(1) | 24(1)          |
| C(18) | 3164(1)  | 6225(1)  | 5968(1) | 24(1)          |
| C(19) | 3341(1)  | 5607(1)  | 5442(1) | 24(1)          |
| C(20) | 2965(1)  | 6112(1)  | 4724(1) | 22(1)          |
| C(21) | 2486(1)  | 10205(1) | 3492(1) | 21(1)          |
| C(22) | 2941(1)  | 10877(1) | 3774(1) | 25(1)          |
| C(23) | 4262(1)  | 10504(1) | 4018(1) | 25(1)          |
| C(24) | 5166(1)  | 9451(1)  | 3985(1) | 23(1)          |
| C(25) | 6949(1)  | 7198(1)  | 3690(1) | 21(1)          |
| C(26) | 7278(1)  | 6884(1)  | 4499(1) | 20(1)          |

|       |          |          |         |       |
|-------|----------|----------|---------|-------|
| C(27) | 6240(1)  | 6895(1)  | 5105(1) | 22(1) |
| C(28) | 6595(1)  | 6572(1)  | 5838(1) | 23(1) |
| C(29) | 7987(1)  | 6232(1)  | 5969(1) | 23(1) |
| C(30) | 9029(1)  | 6217(1)  | 5366(1) | 24(1) |
| C(31) | 8678(1)  | 6544(1)  | 4635(1) | 22(1) |
| C(41) | -592(1)  | 6880(1)  | 1602(1) | 18(1) |
| O(41) | -1566(1) | 7908(1)  | 1725(1) | 22(1) |
| C(42) | -2719(1) | 8416(1)  | 1295(1) | 19(1) |
| O(42) | -2486(1) | 9308(1)  | 762(1)  | 24(1) |
| C(43) | -3035(1) | 7681(1)  | 908(1)  | 19(1) |
| O(43) | -3879(1) | 8861(1)  | 1791(1) | 24(1) |
| C(44) | -2432(1) | 6549(1)  | 1105(1) | 18(1) |
| C(45) | -1454(1) | 6099(1)  | 1715(1) | 18(1) |
| C(46) | 398(1)   | 6469(1)  | 2230(1) | 18(1) |
| N(46) | 1749(1)  | 6154(1)  | 1893(1) | 17(1) |
| O(46) | 33(1)    | 6407(1)  | 2896(1) | 25(1) |
| C(47) | 1795(1)  | 6432(1)  | 1107(1) | 17(1) |
| C(48) | 432(1)   | 6901(1)  | 895(1)  | 18(1) |
| C(49) | -2737(2) | 10118(1) | 1195(1) | 30(1) |
| C(50) | -3923(2) | 9940(1)  | 1785(1) | 36(1) |
| C(51) | -3938(1) | 8148(1)  | 349(1)  | 21(1) |
| C(52) | -4234(1) | 7495(1)  | -23(1)  | 22(1) |
| C(53) | -3633(1) | 6370(1)  | 167(1)  | 22(1) |
| C(54) | -2750(1) | 5902(1)  | 730(1)  | 20(1) |
| C(55) | -582(1)  | 4903(1)  | 1804(1) | 18(1) |
| C(56) | -629(1)  | 4237(1)  | 2513(1) | 22(1) |
| C(57) | 113(1)   | 3126(1)  | 2626(1) | 25(1) |
| C(58) | 919(1)   | 2668(1)  | 2028(1) | 24(1) |
| C(59) | 1000(1)  | 3328(1)  | 1321(1) | 22(1) |
| C(60) | 259(1)   | 4440(1)  | 1205(1) | 19(1) |
| C(61) | 2980(1)  | 6294(1)  | 592(1)  | 21(1) |
| C(62) | 2780(1)  | 6659(1)  | -167(1) | 22(1) |
| C(63) | 1438(1)  | 7149(1)  | -391(1) | 22(1) |
| C(64) | 256(1)   | 7273(1)  | 141(1)  | 21(1) |
| C(65) | 2981(1)  | 5792(1)  | 2294(1) | 19(1) |
| C(66) | 3994(1)  | 4684(1)  | 2187(1) | 18(1) |

|       |         |         |         |       |
|-------|---------|---------|---------|-------|
| C(67) | 5426(1) | 4448(1) | 2210(1) | 19(1) |
| C(68) | 6361(1) | 3411(1) | 2164(1) | 22(1) |
| C(69) | 5875(1) | 2610(1) | 2088(1) | 23(1) |
| C(70) | 4450(1) | 2843(1) | 2058(1) | 22(1) |
| C(71) | 3516(1) | 3877(1) | 2105(1) | 20(1) |

---

Table 3. Bond lengths [Å] and angles [°] for JF2999FMI.

---

|              |            |
|--------------|------------|
| C(1)-O(1)    | 1.4305(14) |
| C(1)-C(8)    | 1.5184(16) |
| C(1)-C(6)    | 1.5512(16) |
| C(1)-C(5)    | 1.5543(16) |
| O(1)-C(2)    | 1.4147(14) |
| C(2)-O(3)    | 1.4060(14) |
| C(2)-O(2)    | 1.4069(14) |
| C(2)-C(3)    | 1.5102(17) |
| O(2)-C(9)    | 1.4343(17) |
| C(3)-C(11)   | 1.3910(17) |
| C(3)-C(4)    | 1.3970(17) |
| O(3)-C(10)   | 1.4317(18) |
| C(4)-C(14)   | 1.3954(17) |
| C(4)-C(5)    | 1.5188(16) |
| C(5)-C(15)   | 1.5145(17) |
| C(5)-H(5)    | 0.982(14)  |
| C(6)-O(6)    | 1.2174(14) |
| C(6)-N(6)    | 1.3646(16) |
| N(6)-C(7)    | 1.4076(15) |
| N(6)-C(25)   | 1.4582(15) |
| C(7)-C(24)   | 1.3798(17) |
| C(7)-C(8)    | 1.3954(16) |
| C(8)-C(21)   | 1.3880(16) |
| C(9)-C(10)   | 1.512(2)   |
| C(9)-H(9A)   | 1.047(18)  |
| C(9)-H(9B)   | 0.997(17)  |
| C(10)-H(10A) | 1.05(2)    |
| C(10)-H(10B) | 0.96(2)    |
| C(11)-C(12)  | 1.3870(18) |
| C(11)-H(11)  | 1.001(16)  |
| C(12)-C(13)  | 1.3896(19) |
| C(12)-H(12)  | 0.978(15)  |
| C(13)-C(14)  | 1.3849(18) |
| C(13)-H(13)  | 0.985(15)  |

|              |            |
|--------------|------------|
| C(14)-H(14)  | 1.003(15)  |
| C(15)-C(20)  | 1.3929(17) |
| C(15)-C(16)  | 1.3987(17) |
| C(16)-C(17)  | 1.3895(18) |
| C(16)-H(16)  | 0.969(15)  |
| C(17)-C(18)  | 1.3889(18) |
| C(17)-H(17)  | 0.975(15)  |
| C(18)-C(19)  | 1.3828(19) |
| C(18)-H(18)  | 0.978(16)  |
| C(19)-C(20)  | 1.3875(18) |
| C(19)-H(19)  | 0.976(16)  |
| C(20)-H(20)  | 1.000(15)  |
| C(21)-C(22)  | 1.3953(18) |
| C(21)-H(21)  | 0.992(15)  |
| C(22)-C(23)  | 1.3871(18) |
| C(22)-H(22)  | 0.958(16)  |
| C(23)-C(24)  | 1.3936(18) |
| C(23)-H(23)  | 0.965(16)  |
| C(24)-H(24)  | 0.967(15)  |
| C(25)-C(26)  | 1.5183(17) |
| C(25)-H(25A) | 0.968(16)  |
| C(25)-H(25B) | 0.979(15)  |
| C(26)-C(27)  | 1.3898(17) |
| C(26)-C(31)  | 1.3953(17) |
| C(27)-C(28)  | 1.3926(18) |
| C(27)-H(27)  | 0.990(15)  |
| C(28)-C(29)  | 1.3851(18) |
| C(28)-H(28)  | 0.978(16)  |
| C(29)-C(30)  | 1.3885(19) |
| C(29)-H(29)  | 0.955(16)  |
| C(30)-C(31)  | 1.3872(18) |
| C(30)-H(30)  | 0.985(16)  |
| C(31)-H(31)  | 0.982(15)  |
| C(41)-O(41)  | 1.4271(13) |
| C(41)-C(48)  | 1.5140(16) |
| C(41)-C(46)  | 1.5529(15) |

|              |            |
|--------------|------------|
| C(41)-C(45)  | 1.5558(16) |
| O(41)-C(42)  | 1.4163(14) |
| C(42)-O(43)  | 1.4014(14) |
| C(42)-O(42)  | 1.4078(14) |
| C(42)-C(43)  | 1.5105(17) |
| O(42)-C(49)  | 1.4341(15) |
| C(43)-C(51)  | 1.3935(17) |
| C(43)-C(44)  | 1.3977(16) |
| O(43)-C(50)  | 1.4315(16) |
| C(44)-C(54)  | 1.3950(17) |
| C(44)-C(45)  | 1.5168(16) |
| C(45)-C(55)  | 1.5153(15) |
| C(45)-H(45)  | 0.979(15)  |
| C(46)-O(46)  | 1.2092(15) |
| C(46)-N(46)  | 1.3680(15) |
| N(46)-C(47)  | 1.4022(15) |
| N(46)-C(65)  | 1.4572(14) |
| C(47)-C(61)  | 1.3804(17) |
| C(47)-C(48)  | 1.3988(16) |
| C(48)-C(64)  | 1.3825(17) |
| C(49)-C(50)  | 1.516(2)   |
| C(49)-H(49A) | 0.995(16)  |
| C(49)-H(49B) | 1.014(17)  |
| C(50)-H(50A) | 0.98(2)    |
| C(50)-H(50B) | 1.05(2)    |
| C(51)-C(52)  | 1.3858(18) |
| C(51)-H(51)  | 0.988(14)  |
| C(52)-C(53)  | 1.3887(18) |
| C(52)-H(52)  | 0.986(15)  |
| C(53)-C(54)  | 1.3872(17) |
| C(53)-H(53)  | 0.981(16)  |
| C(54)-H(54)  | 0.969(15)  |
| C(55)-C(56)  | 1.3916(18) |
| C(55)-C(60)  | 1.3988(17) |
| C(56)-C(57)  | 1.3914(17) |
| C(56)-H(56)  | 0.980(15)  |



|              |            |
|--------------|------------|
| C(57)-C(58)  | 1.3837(19) |
| C(57)-H(57)  | 0.966(17)  |
| C(58)-C(59)  | 1.3887(19) |
| C(58)-H(58)  | 0.949(16)  |
| C(59)-C(60)  | 1.3916(17) |
| C(59)-H(59)  | 0.991(16)  |
| C(60)-H(60)  | 0.978(15)  |
| C(61)-C(62)  | 1.3954(18) |
| C(61)-H(61)  | 0.981(15)  |
| C(62)-C(63)  | 1.3886(18) |
| C(62)-H(62)  | 0.967(15)  |
| C(63)-C(64)  | 1.3964(18) |
| C(63)-H(63)  | 0.960(16)  |
| C(64)-H(64)  | 0.974(16)  |
| C(65)-C(66)  | 1.5146(15) |
| C(65)-H(65A) | 0.995(15)  |
| C(65)-H(65B) | 0.965(15)  |
| C(66)-C(71)  | 1.3920(17) |
| C(66)-C(67)  | 1.3943(17) |
| C(67)-C(68)  | 1.3909(17) |
| C(67)-H(67)  | 0.976(15)  |
| C(68)-C(69)  | 1.3859(18) |
| C(68)-H(68)  | 0.968(15)  |
| C(69)-C(70)  | 1.3901(18) |
| C(69)-H(69)  | 0.977(15)  |
| C(70)-C(71)  | 1.3873(17) |
| C(70)-H(70)  | 0.993(15)  |
| C(71)-H(71)  | 0.956(15)  |

|                |           |
|----------------|-----------|
| O(1)-C(1)-C(8) | 116.97(9) |
| O(1)-C(1)-C(6) | 105.24(9) |
| C(8)-C(1)-C(6) | 102.22(9) |
| O(1)-C(1)-C(5) | 106.89(9) |
| C(8)-C(1)-C(5) | 114.67(9) |
| C(6)-C(1)-C(5) | 110.29(9) |
| C(2)-O(1)-C(1) | 117.70(9) |

|                  |            |
|------------------|------------|
| O(3)-C(2)-O(2)   | 105.90(9)  |
| O(3)-C(2)-O(1)   | 105.85(9)  |
| O(2)-C(2)-O(1)   | 109.16(9)  |
| O(3)-C(2)-C(3)   | 111.16(9)  |
| O(2)-C(2)-C(3)   | 109.66(9)  |
| O(1)-C(2)-C(3)   | 114.70(10) |
| C(2)-O(2)-C(9)   | 105.01(9)  |
| C(11)-C(3)-C(4)  | 120.40(11) |
| C(11)-C(3)-C(2)  | 118.45(11) |
| C(4)-C(3)-C(2)   | 121.13(10) |
| C(2)-O(3)-C(10)  | 108.19(10) |
| C(14)-C(4)-C(3)  | 118.88(11) |
| C(14)-C(4)-C(5)  | 123.20(11) |
| C(3)-C(4)-C(5)   | 117.88(11) |
| C(15)-C(5)-C(4)  | 116.84(10) |
| C(15)-C(5)-C(1)  | 113.81(9)  |
| C(4)-C(5)-C(1)   | 106.30(9)  |
| C(15)-C(5)-H(5)  | 107.0(8)   |
| C(4)-C(5)-H(5)   | 107.1(8)   |
| C(1)-C(5)-H(5)   | 105.0(8)   |
| O(6)-C(6)-N(6)   | 126.48(11) |
| O(6)-C(6)-C(1)   | 125.73(10) |
| N(6)-C(6)-C(1)   | 107.78(9)  |
| C(6)-N(6)-C(7)   | 111.03(9)  |
| C(6)-N(6)-C(25)  | 124.25(10) |
| C(7)-N(6)-C(25)  | 123.54(10) |
| C(24)-C(7)-C(8)  | 122.72(11) |
| C(24)-C(7)-N(6)  | 126.66(11) |
| C(8)-C(7)-N(6)   | 110.61(10) |
| C(21)-C(8)-C(7)  | 118.96(11) |
| C(21)-C(8)-C(1)  | 133.25(11) |
| C(7)-C(8)-C(1)   | 107.73(10) |
| O(2)-C(9)-C(10)  | 102.70(11) |
| O(2)-C(9)-H(9A)  | 109.6(9)   |
| C(10)-C(9)-H(9A) | 111.9(9)   |
| O(2)-C(9)-H(9B)  | 109.0(10)  |

|                     |            |
|---------------------|------------|
| C(10)-C(9)-H(9B)    | 115.1(10)  |
| H(9A)-C(9)-H(9B)    | 108.3(13)  |
| O(3)-C(10)-C(9)     | 104.56(11) |
| O(3)-C(10)-H(10A)   | 109.0(11)  |
| C(9)-C(10)-H(10A)   | 112.2(11)  |
| O(3)-C(10)-H(10B)   | 110.5(12)  |
| C(9)-C(10)-H(10B)   | 112.2(12)  |
| H(10A)-C(10)-H(10B) | 108.4(16)  |
| C(12)-C(11)-C(3)    | 120.20(12) |
| C(12)-C(11)-H(11)   | 122.1(9)   |
| C(3)-C(11)-H(11)    | 117.7(9)   |
| C(11)-C(12)-C(13)   | 119.65(12) |
| C(11)-C(12)-H(12)   | 120.2(9)   |
| C(13)-C(12)-H(12)   | 120.1(9)   |
| C(14)-C(13)-C(12)   | 120.32(12) |
| C(14)-C(13)-H(13)   | 119.0(9)   |
| C(12)-C(13)-H(13)   | 120.7(9)   |
| C(13)-C(14)-C(4)    | 120.54(12) |
| C(13)-C(14)-H(14)   | 119.5(8)   |
| C(4)-C(14)-H(14)    | 120.0(8)   |
| C(20)-C(15)-C(16)   | 118.41(11) |
| C(20)-C(15)-C(5)    | 118.31(11) |
| C(16)-C(15)-C(5)    | 123.26(10) |
| C(17)-C(16)-C(15)   | 120.37(11) |
| C(17)-C(16)-H(16)   | 119.5(9)   |
| C(15)-C(16)-H(16)   | 120.2(9)   |
| C(18)-C(17)-C(16)   | 120.46(12) |
| C(18)-C(17)-H(17)   | 119.8(9)   |
| C(16)-C(17)-H(17)   | 119.7(9)   |
| C(19)-C(18)-C(17)   | 119.53(12) |
| C(19)-C(18)-H(18)   | 121.3(9)   |
| C(17)-C(18)-H(18)   | 119.2(9)   |
| C(18)-C(19)-C(20)   | 120.14(12) |
| C(18)-C(19)-H(19)   | 119.6(9)   |
| C(20)-C(19)-H(19)   | 120.3(9)   |
| C(19)-C(20)-C(15)   | 121.08(12) |

|                     |            |
|---------------------|------------|
| C(19)-C(20)-H(20)   | 121.2(8)   |
| C(15)-C(20)-H(20)   | 117.7(8)   |
| C(8)-C(21)-C(22)    | 119.14(11) |
| C(8)-C(21)-H(21)    | 121.3(8)   |
| C(22)-C(21)-H(21)   | 119.6(8)   |
| C(23)-C(22)-C(21)   | 120.77(11) |
| C(23)-C(22)-H(22)   | 119.0(9)   |
| C(21)-C(22)-H(22)   | 120.2(9)   |
| C(22)-C(23)-C(24)   | 120.77(11) |
| C(22)-C(23)-H(23)   | 119.7(9)   |
| C(24)-C(23)-H(23)   | 119.5(9)   |
| C(7)-C(24)-C(23)    | 117.61(11) |
| C(7)-C(24)-H(24)    | 119.6(9)   |
| C(23)-C(24)-H(24)   | 122.8(9)   |
| N(6)-C(25)-C(26)    | 114.55(10) |
| N(6)-C(25)-H(25A)   | 107.5(9)   |
| C(26)-C(25)-H(25A)  | 110.5(9)   |
| N(6)-C(25)-H(25B)   | 105.8(8)   |
| C(26)-C(25)-H(25B)  | 110.4(8)   |
| H(25A)-C(25)-H(25B) | 107.8(12)  |
| C(27)-C(26)-C(31)   | 119.11(11) |
| C(27)-C(26)-C(25)   | 122.35(11) |
| C(31)-C(26)-C(25)   | 118.51(11) |
| C(26)-C(27)-C(28)   | 120.36(11) |
| C(26)-C(27)-H(27)   | 118.4(9)   |
| C(28)-C(27)-H(27)   | 121.2(9)   |
| C(29)-C(28)-C(27)   | 120.23(12) |
| C(29)-C(28)-H(28)   | 120.0(9)   |
| C(27)-C(28)-H(28)   | 119.8(9)   |
| C(28)-C(29)-C(30)   | 119.66(12) |
| C(28)-C(29)-H(29)   | 120.6(9)   |
| C(30)-C(29)-H(29)   | 119.7(9)   |
| C(31)-C(30)-C(29)   | 120.24(12) |
| C(31)-C(30)-H(30)   | 119.1(9)   |
| C(29)-C(30)-H(30)   | 120.7(9)   |
| C(30)-C(31)-C(26)   | 120.39(12) |

|                   |            |
|-------------------|------------|
| C(30)-C(31)-H(31) | 121.5(9)   |
| C(26)-C(31)-H(31) | 118.1(9)   |
| O(41)-C(41)-C(48) | 116.34(9)  |
| O(41)-C(41)-C(46) | 105.94(9)  |
| C(48)-C(41)-C(46) | 102.19(9)  |
| O(41)-C(41)-C(45) | 106.97(9)  |
| C(48)-C(41)-C(45) | 115.74(9)  |
| C(46)-C(41)-C(45) | 108.95(9)  |
| C(42)-O(41)-C(41) | 118.62(9)  |
| O(43)-C(42)-O(42) | 105.90(9)  |
| O(43)-C(42)-O(41) | 106.02(9)  |
| O(42)-C(42)-O(41) | 108.74(9)  |
| O(43)-C(42)-C(43) | 110.57(9)  |
| O(42)-C(42)-C(43) | 109.87(10) |
| O(41)-C(42)-C(43) | 115.29(9)  |
| C(42)-O(42)-C(49) | 104.11(9)  |
| C(51)-C(43)-C(44) | 120.38(11) |
| C(51)-C(43)-C(42) | 118.95(10) |
| C(44)-C(43)-C(42) | 120.66(11) |
| C(42)-O(43)-C(50) | 107.67(10) |
| C(54)-C(44)-C(43) | 118.72(11) |
| C(54)-C(44)-C(45) | 123.81(10) |
| C(43)-C(44)-C(45) | 117.47(10) |
| C(55)-C(45)-C(44) | 116.31(10) |
| C(55)-C(45)-C(41) | 114.62(9)  |
| C(44)-C(45)-C(41) | 107.08(9)  |
| C(55)-C(45)-H(45) | 106.4(8)   |
| C(44)-C(45)-H(45) | 107.9(8)   |
| C(41)-C(45)-H(45) | 103.6(8)   |
| O(46)-C(46)-N(46) | 126.52(11) |
| O(46)-C(46)-C(41) | 125.99(11) |
| N(46)-C(46)-C(41) | 107.44(10) |
| C(46)-N(46)-C(47) | 111.32(9)  |
| C(46)-N(46)-C(65) | 123.58(10) |
| C(47)-N(46)-C(65) | 123.89(10) |
| C(61)-C(47)-C(48) | 122.68(11) |

|                     |            |
|---------------------|------------|
| C(61)-C(47)-N(46)   | 127.00(11) |
| C(48)-C(47)-N(46)   | 110.32(10) |
| C(64)-C(48)-C(47)   | 119.09(11) |
| C(64)-C(48)-C(41)   | 132.94(11) |
| C(47)-C(48)-C(41)   | 107.97(10) |
| O(42)-C(49)-C(50)   | 102.89(10) |
| O(42)-C(49)-H(49A)  | 107.6(9)   |
| C(50)-C(49)-H(49A)  | 114.7(9)   |
| O(42)-C(49)-H(49B)  | 109.3(9)   |
| C(50)-C(49)-H(49B)  | 111.4(10)  |
| H(49A)-C(49)-H(49B) | 110.5(13)  |
| O(43)-C(50)-C(49)   | 104.45(11) |
| O(43)-C(50)-H(50A)  | 110.1(12)  |
| C(49)-C(50)-H(50A)  | 111.4(12)  |
| O(43)-C(50)-H(50B)  | 106.2(11)  |
| C(49)-C(50)-H(50B)  | 111.8(11)  |
| H(50A)-C(50)-H(50B) | 112.5(16)  |
| C(52)-C(51)-C(43)   | 120.26(11) |
| C(52)-C(51)-H(51)   | 121.6(8)   |
| C(43)-C(51)-H(51)   | 118.1(8)   |
| C(51)-C(52)-C(53)   | 119.68(11) |
| C(51)-C(52)-H(52)   | 121.0(8)   |
| C(53)-C(52)-H(52)   | 119.3(8)   |
| C(54)-C(53)-C(52)   | 120.21(11) |
| C(54)-C(53)-H(53)   | 120.2(9)   |
| C(52)-C(53)-H(53)   | 119.5(9)   |
| C(53)-C(54)-C(44)   | 120.73(11) |
| C(53)-C(54)-H(54)   | 119.6(9)   |
| C(44)-C(54)-H(54)   | 119.7(9)   |
| C(56)-C(55)-C(60)   | 118.71(11) |
| C(56)-C(55)-C(45)   | 118.31(11) |
| C(60)-C(55)-C(45)   | 122.98(11) |
| C(57)-C(56)-C(55)   | 121.03(12) |
| C(57)-C(56)-H(56)   | 120.8(9)   |
| C(55)-C(56)-H(56)   | 118.2(9)   |
| C(58)-C(57)-C(56)   | 119.94(12) |

|                     |            |
|---------------------|------------|
| C(58)-C(57)-H(57)   | 120.6(9)   |
| C(56)-C(57)-H(57)   | 119.5(9)   |
| C(57)-C(58)-C(59)   | 119.61(11) |
| C(57)-C(58)-H(58)   | 119.5(9)   |
| C(59)-C(58)-H(58)   | 120.8(9)   |
| C(58)-C(59)-C(60)   | 120.62(12) |
| C(58)-C(59)-H(59)   | 119.3(9)   |
| C(60)-C(59)-H(59)   | 120.0(9)   |
| C(59)-C(60)-C(55)   | 120.06(11) |
| C(59)-C(60)-H(60)   | 119.1(8)   |
| C(55)-C(60)-H(60)   | 120.8(8)   |
| C(47)-C(61)-C(62)   | 117.39(11) |
| C(47)-C(61)-H(61)   | 121.2(9)   |
| C(62)-C(61)-H(61)   | 121.4(9)   |
| C(63)-C(62)-C(61)   | 120.98(11) |
| C(63)-C(62)-H(62)   | 120.3(8)   |
| C(61)-C(62)-H(62)   | 118.7(8)   |
| C(62)-C(63)-C(64)   | 120.56(12) |
| C(62)-C(63)-H(63)   | 119.5(9)   |
| C(64)-C(63)-H(63)   | 120.0(9)   |
| C(48)-C(64)-C(63)   | 119.27(11) |
| C(48)-C(64)-H(64)   | 121.4(9)   |
| C(63)-C(64)-H(64)   | 119.4(9)   |
| N(46)-C(65)-C(66)   | 113.25(9)  |
| N(46)-C(65)-H(65A)  | 105.4(8)   |
| C(66)-C(65)-H(65A)  | 110.1(8)   |
| N(46)-C(65)-H(65B)  | 109.2(8)   |
| C(66)-C(65)-H(65B)  | 110.0(8)   |
| H(65A)-C(65)-H(65B) | 108.8(12)  |
| C(71)-C(66)-C(67)   | 119.34(11) |
| C(71)-C(66)-C(65)   | 121.24(10) |
| C(67)-C(66)-C(65)   | 119.32(10) |
| C(68)-C(67)-C(66)   | 120.19(11) |
| C(68)-C(67)-H(67)   | 121.4(8)   |
| C(66)-C(67)-H(67)   | 118.4(8)   |
| C(69)-C(68)-C(67)   | 120.08(11) |

|                   |            |
|-------------------|------------|
| C(69)-C(68)-H(68) | 121.3(9)   |
| C(67)-C(68)-H(68) | 118.6(9)   |
| C(68)-C(69)-C(70) | 119.98(11) |
| C(68)-C(69)-H(69) | 119.8(9)   |
| C(70)-C(69)-H(69) | 120.2(9)   |
| C(71)-C(70)-C(69) | 119.98(11) |
| C(71)-C(70)-H(70) | 119.9(8)   |
| C(69)-C(70)-H(70) | 120.2(8)   |
| C(70)-C(71)-C(66) | 120.42(11) |
| C(70)-C(71)-H(71) | 120.3(9)   |
| C(66)-C(71)-H(71) | 119.3(9)   |

---

Symmetry transformations used to generate equivalent atoms:



Table 4. Anisotropic displacement parameters ( $\text{\AA}^2 \times 10^3$ ) for JF2999FMI. The anisotropic displacement factor exponent takes the form:  $-2\pi^2 [ h^2 a^{*2}U^{11} + \dots + 2 h k a^* b^* U^{12} ]$

|       | U <sup>11</sup> | U <sup>22</sup> | U <sup>33</sup> | U <sup>23</sup> | U <sup>13</sup> | U <sup>12</sup> |
|-------|-----------------|-----------------|-----------------|-----------------|-----------------|-----------------|
| C(1)  | 22(1)           | 18(1)           | 15(1)           | -3(1)           | -5(1)           | -5(1)           |
| O(1)  | 21(1)           | 23(1)           | 16(1)           | -4(1)           | -5(1)           | -3(1)           |
| C(2)  | 23(1)           | 16(1)           | 19(1)           | -2(1)           | -7(1)           | -7(1)           |
| O(2)  | 30(1)           | 17(1)           | 21(1)           | -2(1)           | -2(1)           | -8(1)           |
| C(3)  | 22(1)           | 19(1)           | 21(1)           | -6(1)           | -5(1)           | -9(1)           |
| O(3)  | 29(1)           | 25(1)           | 18(1)           | -5(1)           | -6(1)           | -11(1)          |
| C(4)  | 21(1)           | 18(1)           | 22(1)           | -5(1)           | -5(1)           | -9(1)           |
| C(5)  | 22(1)           | 16(1)           | 18(1)           | -5(1)           | -3(1)           | -7(1)           |
| C(6)  | 22(1)           | 20(1)           | 13(1)           | -1(1)           | -3(1)           | -6(1)           |
| N(6)  | 18(1)           | 19(1)           | 17(1)           | -4(1)           | -2(1)           | -4(1)           |
| O(6)  | 27(1)           | 20(1)           | 24(1)           | -8(1)           | -6(1)           | -3(1)           |
| C(7)  | 22(1)           | 19(1)           | 14(1)           | -1(1)           | -1(1)           | -7(1)           |
| C(8)  | 22(1)           | 19(1)           | 14(1)           | -1(1)           | -2(1)           | -8(1)           |
| C(9)  | 39(1)           | 26(1)           | 22(1)           | 0(1)            | 1(1)            | -9(1)           |
| C(10) | 52(1)           | 40(1)           | 19(1)           | -7(1)           | -1(1)           | -20(1)          |
| C(11) | 25(1)           | 22(1)           | 23(1)           | -4(1)           | -8(1)           | -7(1)           |
| C(12) | 21(1)           | 25(1)           | 30(1)           | -8(1)           | -7(1)           | -5(1)           |
| C(13) | 21(1)           | 28(1)           | 26(1)           | -10(1)          | -2(1)           | -9(1)           |
| C(14) | 24(1)           | 24(1)           | 22(1)           | -5(1)           | -4(1)           | -11(1)          |
| C(15) | 19(1)           | 20(1)           | 19(1)           | -3(1)           | -2(1)           | -7(1)           |
| C(16) | 22(1)           | 20(1)           | 21(1)           | -4(1)           | -2(1)           | -6(1)           |
| C(17) | 25(1)           | 30(1)           | 19(1)           | -7(1)           | -1(1)           | -10(1)          |
| C(18) | 24(1)           | 30(1)           | 18(1)           | 1(1)            | -3(1)           | -11(1)          |
| C(19) | 25(1)           | 20(1)           | 24(1)           | 1(1)            | -3(1)           | -8(1)           |
| C(20) | 24(1)           | 20(1)           | 21(1)           | -4(1)           | -2(1)           | -8(1)           |
| C(21) | 23(1)           | 18(1)           | 22(1)           | -1(1)           | -5(1)           | -6(1)           |
| C(22) | 30(1)           | 18(1)           | 25(1)           | -3(1)           | -5(1)           | -7(1)           |
| C(23) | 34(1)           | 24(1)           | 24(1)           | -4(1)           | -6(1)           | -14(1)          |
| C(24) | 24(1)           | 25(1)           | 21(1)           | -2(1)           | -4(1)           | -11(1)          |
| C(25) | 18(1)           | 25(1)           | 19(1)           | -4(1)           | -3(1)           | -4(1)           |
| C(26) | 23(1)           | 16(1)           | 19(1)           | -4(1)           | -4(1)           | -6(1)           |

|       |       |       |       |        |        |        |
|-------|-------|-------|-------|--------|--------|--------|
| C(27) | 21(1) | 21(1) | 22(1) | -4(1)  | -3(1)  | -6(1)  |
| C(28) | 27(1) | 22(1) | 20(1) | -4(1)  | -1(1)  | -9(1)  |
| C(29) | 30(1) | 21(1) | 19(1) | -2(1)  | -7(1)  | -8(1)  |
| C(30) | 23(1) | 24(1) | 25(1) | -5(1)  | -7(1)  | -6(1)  |
| C(31) | 21(1) | 22(1) | 21(1) | -5(1)  | -2(1)  | -6(1)  |
| C(41) | 18(1) | 16(1) | 19(1) | -5(1)  | -3(1)  | -2(1)  |
| O(41) | 21(1) | 18(1) | 26(1) | -9(1)  | -8(1)  | 0(1)   |
| C(42) | 18(1) | 17(1) | 20(1) | -2(1)  | -3(1)  | -2(1)  |
| O(42) | 32(1) | 20(1) | 22(1) | -2(1)  | -5(1)  | -11(1) |
| C(43) | 16(1) | 20(1) | 19(1) | -5(1)  | 1(1)   | -5(1)  |
| O(43) | 21(1) | 21(1) | 28(1) | -9(1)  | 1(1)   | -3(1)  |
| C(44) | 15(1) | 20(1) | 17(1) | -3(1)  | 2(1)   | -6(1)  |
| C(45) | 17(1) | 19(1) | 16(1) | -4(1)  | 0(1)   | -4(1)  |
| C(46) | 20(1) | 16(1) | 17(1) | -5(1)  | -2(1)  | -4(1)  |
| N(46) | 18(1) | 17(1) | 16(1) | -3(1)  | -4(1)  | -4(1)  |
| O(46) | 23(1) | 32(1) | 18(1) | -7(1)  | -2(1)  | -3(1)  |
| C(47) | 22(1) | 14(1) | 17(1) | -3(1)  | -4(1)  | -7(1)  |
| C(48) | 20(1) | 14(1) | 20(1) | -4(1)  | -3(1)  | -6(1)  |
| C(49) | 43(1) | 19(1) | 30(1) | -4(1)  | -12(1) | -10(1) |
| C(50) | 49(1) | 23(1) | 36(1) | -13(1) | 1(1)   | -9(1)  |
| C(51) | 18(1) | 20(1) | 23(1) | -2(1)  | -2(1)  | -4(1)  |
| C(52) | 18(1) | 27(1) | 22(1) | -3(1)  | -4(1)  | -6(1)  |
| C(53) | 19(1) | 25(1) | 23(1) | -7(1)  | -2(1)  | -9(1)  |
| C(54) | 17(1) | 19(1) | 22(1) | -4(1)  | 1(1)   | -6(1)  |
| C(55) | 16(1) | 18(1) | 21(1) | -3(1)  | -4(1)  | -6(1)  |
| C(56) | 20(1) | 24(1) | 21(1) | -3(1)  | -3(1)  | -8(1)  |
| C(57) | 24(1) | 22(1) | 27(1) | 3(1)   | -7(1)  | -10(1) |
| C(58) | 22(1) | 16(1) | 35(1) | -2(1)  | -9(1)  | -6(1)  |
| C(59) | 19(1) | 22(1) | 28(1) | -9(1)  | -4(1)  | -6(1)  |
| C(60) | 19(1) | 20(1) | 20(1) | -4(1)  | -4(1)  | -7(1)  |
| C(61) | 19(1) | 21(1) | 22(1) | -4(1)  | -4(1)  | -7(1)  |
| C(62) | 24(1) | 25(1) | 20(1) | -5(1)  | 0(1)   | -11(1) |
| C(63) | 27(1) | 24(1) | 17(1) | -1(1)  | -4(1)  | -10(1) |
| C(64) | 22(1) | 20(1) | 21(1) | -2(1)  | -6(1)  | -7(1)  |
| C(65) | 20(1) | 19(1) | 19(1) | -5(1)  | -7(1)  | -5(1)  |
| C(66) | 21(1) | 19(1) | 11(1) | -1(1)  | -2(1)  | -5(1)  |

|       |       |       |       |       |       |       |
|-------|-------|-------|-------|-------|-------|-------|
| C(67) | 22(1) | 22(1) | 14(1) | -3(1) | -3(1) | -8(1) |
| C(68) | 19(1) | 28(1) | 16(1) | -5(1) | -3(1) | -4(1) |
| C(69) | 26(1) | 20(1) | 18(1) | -5(1) | -3(1) | -1(1) |
| C(70) | 27(1) | 20(1) | 20(1) | -4(1) | -4(1) | -7(1) |
| C(71) | 20(1) | 22(1) | 18(1) | -4(1) | -3(1) | -6(1) |

---

Table 5. Hydrogen coordinates ( $\times 10^4$ ) and isotropic displacement parameters ( $\text{\AA}^2 \times 10^{-3}$ ) for JF2999FMI.

|        | x         | y         | z        | U(eq) |
|--------|-----------|-----------|----------|-------|
| H(5)   | 2118(14)  | 7147(11)  | 3488(8)  | 17(3) |
| H(9A)  | 3483(19)  | 9595(14)  | 1101(9)  | 41(4) |
| H(9B)  | 2171(17)  | 10649(14) | 744(10)  | 38(4) |
| H(10A) | 890(20)   | 9542(16)  | 673(12)  | 61(6) |
| H(10B) | 2430(20)  | 8599(17)  | 726(12)  | 58(6) |
| H(11)  | -857(15)  | 10588(12) | 2244(9)  | 28(4) |
| H(12)  | -2723(16) | 10923(12) | 3257(8)  | 28(4) |
| H(13)  | -2373(15) | 9840(12)  | 4487(9)  | 26(4) |
| H(14)  | -266(15)  | 8386(12)  | 4708(9)  | 25(4) |
| H(16)  | 1907(15)  | 8650(12)  | 4918(8)  | 24(4) |
| H(17)  | 2477(15)  | 7792(12)  | 6144(9)  | 27(4) |
| H(18)  | 3438(16)  | 5885(12)  | 6474(9)  | 29(4) |
| H(19)  | 3743(16)  | 4816(13)  | 5576(9)  | 32(4) |
| H(20)  | 3085(15)  | 5677(12)  | 4336(8)  | 24(4) |
| H(21)  | 1528(16)  | 10480(11) | 3334(8)  | 23(3) |
| H(22)  | 2336(16)  | 11601(13) | 3809(8)  | 28(4) |
| H(23)  | 4559(16)  | 10978(13) | 4214(9)  | 30(4) |
| H(24)  | 6088(16)  | 9164(12)  | 4158(8)  | 27(4) |
| H(25A) | 7445(15)  | 7682(12)  | 3390(9)  | 26(4) |
| H(25B) | 7246(15)  | 6551(12)  | 3471(8)  | 23(3) |
| H(27)  | 5253(16)  | 7115(12)  | 5002(8)  | 28(4) |
| H(28)  | 5856(16)  | 6588(12)  | 6261(9)  | 29(4) |
| H(29)  | 8239(15)  | 6000(12)  | 6470(9)  | 26(4) |
| H(30)  | 10024(17) | 5980(12)  | 5450(9)  | 32(4) |
| H(31)  | 9400(16)  | 6537(12)  | 4201(9)  | 26(4) |
| H(45)  | -2029(14) | 6189(11)  | 2196(8)  | 19(3) |
| H(49A) | -2980(16) | 10841(13) | 847(9)   | 31(4) |
| H(49B) | -1858(18) | 9974(13)  | 1431(9)  | 39(4) |
| H(50A) | -3770(20) | 9986(16)  | 2281(12) | 58(6) |
| H(50B) | -4910(20) | 10464(16) | 1625(11) | 58(5) |

|        |           |          |         |       |
|--------|-----------|----------|---------|-------|
| H(51)  | -4334(14) | 8951(12) | 220(8)  | 21(3) |
| H(52)  | -4853(15) | 7817(11) | -427(8) | 23(3) |
| H(53)  | -3827(16) | 5910(12) | -104(9) | 28(4) |
| H(54)  | -2345(15) | 5116(12) | 863(8)  | 23(4) |
| H(56)  | -1213(15) | 4570(12) | 2930(9) | 25(4) |
| H(57)  | 43(16)    | 2677(13) | 3121(9) | 31(4) |
| H(58)  | 1412(16)  | 1908(13) | 2108(9) | 30(4) |
| H(59)  | 1599(16)  | 3000(12) | 898(9)  | 29(4) |
| H(60)  | 327(14)   | 4887(11) | 701(8)  | 21(3) |
| H(61)  | 3925(16)  | 5957(12) | 755(8)  | 27(4) |
| H(62)  | 3596(15)  | 6554(11) | -538(8) | 21(3) |
| H(63)  | 1327(15)  | 7391(12) | -917(9) | 26(4) |
| H(64)  | -677(17)  | 7620(12) | -27(9)  | 30(4) |
| H(65A) | 2607(15)  | 5767(11) | 2834(9) | 23(4) |
| H(65B) | 3456(15)  | 6327(11) | 2135(8) | 21(3) |
| H(67)  | 5747(15)  | 5024(12) | 2263(8) | 25(4) |
| H(68)  | 7349(16)  | 3266(12) | 2188(8) | 26(4) |
| H(69)  | 6539(16)  | 1888(13) | 2044(8) | 27(4) |
| H(70)  | 4097(15)  | 2269(12) | 2010(8) | 27(4) |
| H(71)  | 2533(16)  | 4036(11) | 2096(8) | 24(4) |

---

Table 6. Torsion angles [°] for JF2999FMI.

---

|                       |             |
|-----------------------|-------------|
| C(8)-C(1)-O(1)-C(2)   | -70.52(13)  |
| C(6)-C(1)-O(1)-C(2)   | 176.85(9)   |
| C(5)-C(1)-O(1)-C(2)   | 59.57(12)   |
| C(1)-O(1)-C(2)-O(3)   | -144.02(9)  |
| C(1)-O(1)-C(2)-O(2)   | 102.39(11)  |
| C(1)-O(1)-C(2)-C(3)   | -21.10(14)  |
| O(3)-C(2)-O(2)-C(9)   | -36.67(12)  |
| O(1)-C(2)-O(2)-C(9)   | 76.88(11)   |
| C(3)-C(2)-O(2)-C(9)   | -156.69(10) |
| O(3)-C(2)-C(3)-C(11)  | -72.88(13)  |
| O(2)-C(2)-C(3)-C(11)  | 43.88(14)   |
| O(1)-C(2)-C(3)-C(11)  | 167.10(10)  |
| O(3)-C(2)-C(3)-C(4)   | 108.89(12)  |
| O(2)-C(2)-C(3)-C(4)   | -134.35(11) |
| O(1)-C(2)-C(3)-C(4)   | -11.13(15)  |
| O(2)-C(2)-O(3)-C(10)  | 22.72(13)   |
| O(1)-C(2)-O(3)-C(10)  | -93.10(11)  |
| C(3)-C(2)-O(3)-C(10)  | 141.76(11)  |
| C(11)-C(3)-C(4)-C(14) | 0.16(17)    |
| C(2)-C(3)-C(4)-C(14)  | 178.36(10)  |
| C(11)-C(3)-C(4)-C(5)  | -177.69(10) |
| C(2)-C(3)-C(4)-C(5)   | 0.51(16)    |
| C(14)-C(4)-C(5)-C(15) | -12.99(16)  |
| C(3)-C(4)-C(5)-C(15)  | 164.76(10)  |
| C(14)-C(4)-C(5)-C(1)  | -141.26(11) |
| C(3)-C(4)-C(5)-C(1)   | 36.49(13)   |
| O(1)-C(1)-C(5)-C(15)  | 165.21(9)   |
| C(8)-C(1)-C(5)-C(15)  | -63.41(13)  |
| C(6)-C(1)-C(5)-C(15)  | 51.30(12)   |
| O(1)-C(1)-C(5)-C(4)   | -64.76(11)  |
| C(8)-C(1)-C(5)-C(4)   | 66.62(12)   |
| C(6)-C(1)-C(5)-C(4)   | -178.67(9)  |
| O(1)-C(1)-C(6)-O(6)   | -50.55(15)  |
| C(8)-C(1)-C(6)-O(6)   | -173.23(12) |

|                         |             |
|-------------------------|-------------|
| C(5)-C(1)-C(6)-O(6)     | 64.41(15)   |
| O(1)-C(1)-C(6)-N(6)     | 130.62(10)  |
| C(8)-C(1)-C(6)-N(6)     | 7.94(12)    |
| C(5)-C(1)-C(6)-N(6)     | -114.42(10) |
| O(6)-C(6)-N(6)-C(7)     | 174.53(12)  |
| C(1)-C(6)-N(6)-C(7)     | -6.65(13)   |
| O(6)-C(6)-N(6)-C(25)    | 6.61(19)    |
| C(1)-C(6)-N(6)-C(25)    | -174.58(10) |
| C(6)-N(6)-C(7)-C(24)    | -177.81(12) |
| C(25)-N(6)-C(7)-C(24)   | -9.78(18)   |
| C(6)-N(6)-C(7)-C(8)     | 2.41(13)    |
| C(25)-N(6)-C(7)-C(8)    | 170.43(10)  |
| C(24)-C(7)-C(8)-C(21)   | 0.95(18)    |
| N(6)-C(7)-C(8)-C(21)    | -179.26(10) |
| C(24)-C(7)-C(8)-C(1)    | -176.75(11) |
| N(6)-C(7)-C(8)-C(1)     | 3.04(13)    |
| O(1)-C(1)-C(8)-C(21)    | 61.93(17)   |
| C(6)-C(1)-C(8)-C(21)    | 176.27(13)  |
| C(5)-C(1)-C(8)-C(21)    | -64.40(17)  |
| O(1)-C(1)-C(8)-C(7)     | -120.83(11) |
| C(6)-C(1)-C(8)-C(7)     | -6.49(12)   |
| C(5)-C(1)-C(8)-C(7)     | 112.84(11)  |
| C(2)-O(2)-C(9)-C(10)    | 35.10(13)   |
| C(2)-O(3)-C(10)-C(9)    | -0.59(14)   |
| O(2)-C(9)-C(10)-O(3)    | -20.98(14)  |
| C(4)-C(3)-C(11)-C(12)   | 0.04(18)    |
| C(2)-C(3)-C(11)-C(12)   | -178.20(11) |
| C(3)-C(11)-C(12)-C(13)  | 0.48(18)    |
| C(11)-C(12)-C(13)-C(14) | -1.22(19)   |
| C(12)-C(13)-C(14)-C(4)  | 1.43(18)    |
| C(3)-C(4)-C(14)-C(13)   | -0.90(17)   |
| C(5)-C(4)-C(14)-C(13)   | 176.84(11)  |
| C(4)-C(5)-C(15)-C(20)   | 132.92(11)  |
| C(1)-C(5)-C(15)-C(20)   | -102.54(12) |
| C(4)-C(5)-C(15)-C(16)   | -48.76(16)  |
| C(1)-C(5)-C(15)-C(16)   | 75.78(14)   |

|                         |             |
|-------------------------|-------------|
| C(20)-C(15)-C(16)-C(17) | -0.50(18)   |
| C(5)-C(15)-C(16)-C(17)  | -178.82(11) |
| C(15)-C(16)-C(17)-C(18) | 1.36(19)    |
| C(16)-C(17)-C(18)-C(19) | -0.90(19)   |
| C(17)-C(18)-C(19)-C(20) | -0.41(19)   |
| C(18)-C(19)-C(20)-C(15) | 1.28(19)    |
| C(16)-C(15)-C(20)-C(19) | -0.82(18)   |
| C(5)-C(15)-C(20)-C(19)  | 177.59(11)  |
| C(7)-C(8)-C(21)-C(22)   | 0.21(17)    |
| C(1)-C(8)-C(21)-C(22)   | 177.20(12)  |
| C(8)-C(21)-C(22)-C(23)  | -0.77(19)   |
| C(21)-C(22)-C(23)-C(24) | 0.2(2)      |
| C(8)-C(7)-C(24)-C(23)   | -1.49(18)   |
| N(6)-C(7)-C(24)-C(23)   | 178.75(11)  |
| C(22)-C(23)-C(24)-C(7)  | 0.89(19)    |
| C(6)-N(6)-C(25)-C(26)   | -121.54(12) |
| C(7)-N(6)-C(25)-C(26)   | 72.01(14)   |
| N(6)-C(25)-C(26)-C(27)  | 12.83(16)   |
| N(6)-C(25)-C(26)-C(31)  | -168.96(10) |
| C(31)-C(26)-C(27)-C(28) | 0.08(17)    |
| C(25)-C(26)-C(27)-C(28) | 178.29(11)  |
| C(26)-C(27)-C(28)-C(29) | -0.34(18)   |
| C(27)-C(28)-C(29)-C(30) | 0.22(18)    |
| C(28)-C(29)-C(30)-C(31) | 0.16(18)    |
| C(29)-C(30)-C(31)-C(26) | -0.42(18)   |
| C(27)-C(26)-C(31)-C(30) | 0.29(17)    |
| C(25)-C(26)-C(31)-C(30) | -177.98(11) |
| C(48)-C(41)-O(41)-C(42) | 75.45(13)   |
| C(46)-C(41)-O(41)-C(42) | -171.82(9)  |
| C(45)-C(41)-O(41)-C(42) | -55.69(13)  |
| C(41)-O(41)-C(42)-O(43) | 139.41(10)  |
| C(41)-O(41)-C(42)-O(42) | -107.12(11) |
| C(41)-O(41)-C(42)-C(43) | 16.74(15)   |
| O(43)-C(42)-O(42)-C(49) | 39.18(12)   |
| O(41)-C(42)-O(42)-C(49) | -74.37(11)  |
| C(43)-C(42)-O(42)-C(49) | 158.61(10)  |



|                         |             |
|-------------------------|-------------|
| O(43)-C(42)-C(43)-C(51) | 73.55(14)   |
| O(42)-C(42)-C(43)-C(51) | -42.97(14)  |
| O(41)-C(42)-C(43)-C(51) | -166.23(11) |
| O(43)-C(42)-C(43)-C(44) | -106.45(12) |
| O(42)-C(42)-C(43)-C(44) | 137.02(11)  |
| O(41)-C(42)-C(43)-C(44) | 13.76(16)   |
| O(42)-C(42)-O(43)-C(50) | -26.51(13)  |
| O(41)-C(42)-O(43)-C(50) | 88.91(12)   |
| C(43)-C(42)-O(43)-C(50) | -145.47(11) |
| C(51)-C(43)-C(44)-C(54) | 0.19(17)    |
| C(42)-C(43)-C(44)-C(54) | -179.80(10) |
| C(51)-C(43)-C(44)-C(45) | 179.70(10)  |
| C(42)-C(43)-C(44)-C(45) | -0.29(16)   |
| C(54)-C(44)-C(45)-C(55) | 11.99(16)   |
| C(43)-C(44)-C(45)-C(55) | -167.50(10) |
| C(54)-C(44)-C(45)-C(41) | 141.65(11)  |
| C(43)-C(44)-C(45)-C(41) | -37.84(14)  |
| O(41)-C(41)-C(45)-C(55) | -165.10(9)  |
| C(48)-C(41)-C(45)-C(55) | 63.43(13)   |
| C(46)-C(41)-C(45)-C(55) | -51.00(13)  |
| O(41)-C(41)-C(45)-C(44) | 64.28(11)   |
| C(48)-C(41)-C(45)-C(44) | -67.18(12)  |
| C(46)-C(41)-C(45)-C(44) | 178.39(9)   |
| O(41)-C(41)-C(46)-O(46) | 51.37(15)   |
| C(48)-C(41)-C(46)-O(46) | 173.63(11)  |
| C(45)-C(41)-C(46)-O(46) | -63.41(14)  |
| O(41)-C(41)-C(46)-N(46) | -130.92(9)  |
| C(48)-C(41)-C(46)-N(46) | -8.65(11)   |
| C(45)-C(41)-C(46)-N(46) | 114.30(10)  |
| O(46)-C(46)-N(46)-C(47) | -174.70(11) |
| C(41)-C(46)-N(46)-C(47) | 7.60(12)    |
| O(46)-C(46)-N(46)-C(65) | -6.80(18)   |
| C(41)-C(46)-N(46)-C(65) | 175.50(9)   |
| C(46)-N(46)-C(47)-C(61) | 176.11(11)  |
| C(65)-N(46)-C(47)-C(61) | 8.25(17)    |
| C(46)-N(46)-C(47)-C(48) | -3.22(13)   |

|                         |             |
|-------------------------|-------------|
| C(65)-N(46)-C(47)-C(48) | -171.07(10) |
| C(61)-C(47)-C(48)-C(64) | -2.02(17)   |
| N(46)-C(47)-C(48)-C(64) | 177.34(10)  |
| C(61)-C(47)-C(48)-C(41) | 177.86(10)  |
| N(46)-C(47)-C(48)-C(41) | -2.78(12)   |
| O(41)-C(41)-C(48)-C(64) | -58.50(17)  |
| C(46)-C(41)-C(48)-C(64) | -173.37(12) |
| C(45)-C(41)-C(48)-C(64) | 68.40(16)   |
| O(41)-C(41)-C(48)-C(47) | 121.65(10)  |
| C(46)-C(41)-C(48)-C(47) | 6.78(11)    |
| C(45)-C(41)-C(48)-C(47) | -111.45(11) |
| C(42)-O(42)-C(49)-C(50) | -35.35(12)  |
| C(42)-O(43)-C(50)-C(49) | 3.90(14)    |
| O(42)-C(49)-C(50)-O(43) | 19.30(14)   |
| C(44)-C(43)-C(51)-C(52) | -0.74(18)   |
| C(42)-C(43)-C(51)-C(52) | 179.25(11)  |
| C(43)-C(51)-C(52)-C(53) | 0.38(19)    |
| C(51)-C(52)-C(53)-C(54) | 0.54(19)    |
| C(52)-C(53)-C(54)-C(44) | -1.10(18)   |
| C(43)-C(44)-C(54)-C(53) | 0.73(17)    |
| C(45)-C(44)-C(54)-C(53) | -178.75(11) |
| C(44)-C(45)-C(55)-C(56) | -126.99(11) |
| C(41)-C(45)-C(55)-C(56) | 107.07(12)  |
| C(44)-C(45)-C(55)-C(60) | 52.54(15)   |
| C(41)-C(45)-C(55)-C(60) | -73.41(14)  |
| C(60)-C(55)-C(56)-C(57) | -1.65(17)   |
| C(45)-C(55)-C(56)-C(57) | 177.90(11)  |
| C(55)-C(56)-C(57)-C(58) | 0.33(18)    |
| C(56)-C(57)-C(58)-C(59) | 1.10(18)    |
| C(57)-C(58)-C(59)-C(60) | -1.19(18)   |
| C(58)-C(59)-C(60)-C(55) | -0.14(18)   |
| C(56)-C(55)-C(60)-C(59) | 1.55(17)    |
| C(45)-C(55)-C(60)-C(59) | -177.98(10) |
| C(48)-C(47)-C(61)-C(62) | 1.02(17)    |
| N(46)-C(47)-C(61)-C(62) | -178.23(11) |
| C(47)-C(61)-C(62)-C(63) | 0.46(18)    |

|                         |             |
|-------------------------|-------------|
| C(61)-C(62)-C(63)-C(64) | -0.92(18)   |
| C(47)-C(48)-C(64)-C(63) | 1.50(17)    |
| C(41)-C(48)-C(64)-C(63) | -178.34(11) |
| C(62)-C(63)-C(64)-C(48) | -0.09(18)   |
| C(46)-N(46)-C(65)-C(66) | 125.52(11)  |
| C(47)-N(46)-C(65)-C(66) | -68.09(14)  |
| N(46)-C(65)-C(66)-C(71) | -33.79(16)  |
| N(46)-C(65)-C(66)-C(67) | 149.68(11)  |
| C(71)-C(66)-C(67)-C(68) | -1.01(17)   |
| C(65)-C(66)-C(67)-C(68) | 175.59(11)  |
| C(66)-C(67)-C(68)-C(69) | 0.57(18)    |
| C(67)-C(68)-C(69)-C(70) | -0.02(18)   |
| C(68)-C(69)-C(70)-C(71) | -0.08(18)   |
| C(69)-C(70)-C(71)-C(66) | -0.37(18)   |
| C(67)-C(66)-C(71)-C(70) | 0.91(17)    |
| C(65)-C(66)-C(71)-C(70) | -175.62(11) |

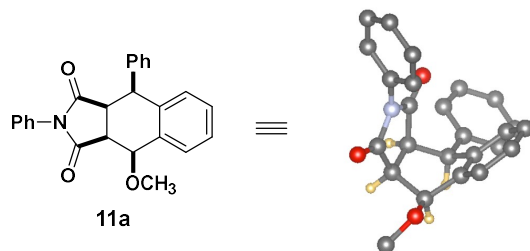

CCDC 2240749

Table 1. Crystal data and structure refinement for [C<sub>28</sub>H<sub>26</sub>N<sub>2</sub>O<sub>3</sub>].

|                      |                                                               |                   |
|----------------------|---------------------------------------------------------------|-------------------|
| Identification code  | JF3055FMI                                                     | (JMR-II-175)      |
| Empirical formula    | C <sub>28</sub> H <sub>26</sub> N <sub>2</sub> O <sub>3</sub> |                   |
| Formula weight       | 438.51                                                        |                   |
| Temperature          | 100(2) K                                                      |                   |
| Wavelength           | 0.71073 Å                                                     |                   |
| Crystal system       | Monoclinic                                                    |                   |
| Space group          | P2 <sub>1</sub> /n                                            |                   |
| Unit cell dimensions | a = 7.9089(3) Å                                               | α = 90°.          |
|                      | b = 21.0205(9) Å                                              | β = 96.0784(16)°. |
|                      | c = 13.3410(6) Å                                              | γ = 90°.          |
| Volume               | 2205.46(16) Å <sup>3</sup>                                    |                   |

|                                   |                                                                             |
|-----------------------------------|-----------------------------------------------------------------------------|
| Z                                 | 4                                                                           |
| Density (calculated)              | 1.321 Mg/m <sup>3</sup>                                                     |
| Absorption coefficient            | 0.086 mm <sup>-1</sup>                                                      |
| F(000)                            | 928                                                                         |
| Crystal size                      | 0.401 x 0.302 x 0.150 mm <sup>3</sup>                                       |
| Crystal color and habit           | Colorless Block                                                             |
| Diffractometer                    | Bruker Photon2 CMOS                                                         |
| Theta range for data collection   | 2.472 to 29.999°.                                                           |
| Index ranges                      | -11 ≤ h ≤ 11, -29 ≤ k ≤ 29, -18 ≤ l ≤ 18                                    |
| Reflections collected             | 24830                                                                       |
| Independent reflections           | 6426 [R(int) = 0.0166]                                                      |
| Observed reflections (I > 2σ(I))  | 5835                                                                        |
| Completeness to theta = 25.242°   | 99.8 %                                                                      |
| Absorption correction             | Semi-empirical from equivalents                                             |
| Max. and min. transmission        | 0.9749 and 0.9261                                                           |
| Solution method                   | SHELXT (Sheldrick, 2014)                                                    |
| Refinement method                 | SHELXL-2018/3 (Sheldrick, 2018) Full-matrix least-squares on F <sup>2</sup> |
| Data / restraints / parameters    | 6426 / 0 / 402                                                              |
| Goodness-of-fit on F <sup>2</sup> | 1.039                                                                       |
| Final R indices [I > 2σ(I)]       | R1 = 0.0373, wR2 = 0.0945                                                   |
| R indices (all data)              | R1 = 0.0413, wR2 = 0.0978                                                   |
| Largest diff. peak and hole       | 0.393 and -0.191 e.Å <sup>-3</sup>                                          |

Table 2. Atomic coordinates ( $\times 10^4$ ) and equivalent isotropic displacement parameters ( $\text{\AA}^2 \times 10^3$ ) for JF3055FMI.  $U(\text{eq})$  is defined as one third of the trace of the orthogonalized  $U^{ij}$  tensor.

|       | x        | y       | z       | $U(\text{eq})$ |
|-------|----------|---------|---------|----------------|
| C(1)  | 5436(1)  | 3419(1) | 2173(1) | 13(1)          |
| C(2)  | 5230(1)  | 3274(1) | 3277(1) | 15(1)          |
| C(3)  | 6171(1)  | 2807(1) | 2683(1) | 15(1)          |
| C(4)  | 7988(1)  | 2824(1) | 3126(1) | 16(1)          |
| N(4)  | 8130(1)  | 3296(1) | 3869(1) | 16(1)          |
| O(4)  | 9144(1)  | 2496(1) | 2900(1) | 20(1)          |
| C(5)  | 6556(1)  | 3568(1) | 4019(1) | 16(1)          |
| O(5)  | 6353(1)  | 3968(1) | 4645(1) | 23(1)          |
| C(6)  | 6581(1)  | 3959(1) | 1942(1) | 13(1)          |
| C(7)  | 8075(1)  | 3839(1) | 1503(1) | 16(1)          |
| C(8)  | 9139(1)  | 4334(1) | 1276(1) | 19(1)          |
| C(9)  | 8713(1)  | 4955(1) | 1498(1) | 21(1)          |
| C(10) | 7231(1)  | 5079(1) | 1940(1) | 19(1)          |
| C(11) | 6131(1)  | 4589(1) | 2152(1) | 15(1)          |
| C(12) | 4492(1)  | 4734(1) | 2601(1) | 16(1)          |
| N(12) | 3961(1)  | 5397(1) | 2478(1) | 15(1)          |
| C(13) | 2585(1)  | 5524(1) | 3106(1) | 18(1)          |
| C(14) | 2028(2)  | 6211(1) | 2992(1) | 24(1)          |
| O(14) | 1475(1)  | 6367(1) | 1963(1) | 23(1)          |
| C(15) | 2820(1)  | 6242(1) | 1352(1) | 21(1)          |
| C(16) | 3362(1)  | 5549(1) | 1428(1) | 16(1)          |
| C(17) | 3909(1)  | 3304(1) | 1418(1) | 14(1)          |
| C(18) | 2642(1)  | 2870(1) | 1609(1) | 17(1)          |
| C(19) | 1302(1)  | 2739(1) | 874(1)  | 20(1)          |
| C(20) | 1191(1)  | 3040(1) | -56(1)  | 20(1)          |
| C(21) | 2435(1)  | 3476(1) | -251(1) | 20(1)          |
| C(22) | 3784(1)  | 3608(1) | 481(1)  | 17(1)          |
| C(23) | 9689(1)  | 3477(1) | 4441(1) | 17(1)          |
| C(24) | 10231(1) | 4105(1) | 4424(1) | 24(1)          |
| C(25) | 11699(2) | 4283(1) | 5030(1) | 29(1)          |
| C(26) | 12617(1) | 3837(1) | 5632(1) | 27(1)          |

|       |          |         |         |       |
|-------|----------|---------|---------|-------|
| C(27) | 12070(1) | 3212(1) | 5627(1) | 24(1) |
| C(28) | 10600(1) | 3025(1) | 5032(1) | 20(1) |

---

Table 3. Bond lengths [ $\text{\AA}$ ] and angles [ $^\circ$ ] for JF3055FMI.

|              |            |                 |            |
|--------------|------------|-----------------|------------|
| C(1)-C(6)    | 1.5038(12) | C(14)-H(14A)    | 0.981(15)  |
| C(1)-C(17)   | 1.5082(12) | C(14)-H(14B)    | 1.014(16)  |
| C(1)-C(2)    | 1.5299(12) | O(14)-C(15)     | 1.4316(12) |
| C(1)-C(3)    | 1.5401(12) | C(15)-C(16)     | 1.5186(14) |
| C(2)-C(5)    | 1.4973(13) | C(15)-H(15A)    | 0.996(15)  |
| C(2)-C(3)    | 1.5058(13) | C(15)-H(15B)    | 0.970(14)  |
| C(2)-H(2)    | 0.956(14)  | C(16)-H(16A)    | 1.015(14)  |
| C(3)-C(4)    | 1.4953(13) | C(16)-H(16B)    | 0.996(13)  |
| C(3)-H(3)    | 0.960(14)  | C(17)-C(18)     | 1.3980(12) |
| C(4)-O(4)    | 1.2088(12) | C(17)-C(22)     | 1.3983(12) |
| C(4)-N(4)    | 1.3985(12) | C(18)-C(19)     | 1.3925(13) |
| N(4)-C(5)    | 1.4030(12) | C(18)-H(18)     | 0.956(15)  |
| N(4)-C(23)   | 1.4312(12) | C(19)-C(20)     | 1.3881(14) |
| C(5)-O(5)    | 1.2068(12) | C(19)-H(19)     | 0.975(16)  |
| C(6)-C(7)    | 1.3962(12) | C(20)-C(21)     | 1.3892(15) |
| C(6)-C(11)   | 1.4067(12) | C(20)-H(20)     | 0.960(15)  |
| C(7)-C(8)    | 1.3910(13) | C(21)-C(22)     | 1.3959(13) |
| C(7)-H(7)    | 0.982(14)  | C(21)-H(21)     | 0.958(16)  |
| C(8)-C(9)    | 1.3884(14) | C(22)-H(22)     | 0.965(14)  |
| C(8)-H(8)    | 0.971(14)  | C(23)-C(28)     | 1.3870(13) |
| C(9)-C(10)   | 1.3915(14) | C(23)-C(24)     | 1.3884(14) |
| C(9)-H(9)    | 0.967(15)  | C(24)-C(25)     | 1.3939(15) |
| C(10)-C(11)  | 1.3961(12) | C(24)-H(24)     | 1.005(16)  |
| C(10)-H(10)  | 0.970(15)  | C(25)-C(26)     | 1.3883(17) |
| C(11)-C(12)  | 1.5154(12) | C(25)-H(25)     | 0.956(19)  |
| C(12)-N(12)  | 1.4609(11) | C(26)-C(27)     | 1.3842(17) |
| C(12)-H(12A) | 1.001(14)  | C(26)-H(26)     | 0.967(16)  |
| C(12)-H(12B) | 0.987(14)  | C(27)-C(28)     | 1.3924(14) |
| N(12)-C(16)  | 1.4657(12) | C(27)-H(27)     | 0.969(16)  |
| N(12)-C(13)  | 1.4659(12) | C(28)-H(28)     | 0.976(15)  |
| C(13)-C(14)  | 1.5132(14) |                 |            |
| C(13)-H(13A) | 0.963(14)  | C(6)-C(1)-C(17) | 116.23(7)  |
| C(13)-H(13B) | 1.008(15)  | C(6)-C(1)-C(2)  | 118.38(7)  |
| C(14)-O(14)  | 1.4342(12) | C(17)-C(1)-C(2) | 116.84(7)  |

|                 |           |                     |           |
|-----------------|-----------|---------------------|-----------|
| C(6)-C(1)-C(3)  | 120.89(7) | C(9)-C(10)-C(11)    | 121.29(9) |
| C(17)-C(1)-C(3) | 113.51(7) | C(9)-C(10)-H(10)    | 120.8(9)  |
| C(2)-C(1)-C(3)  | 58.74(6)  | C(11)-C(10)-H(10)   | 117.9(9)  |
| C(5)-C(2)-C(3)  | 105.47(7) | C(10)-C(11)-C(6)    | 118.53(8) |
| C(5)-C(2)-C(1)  | 114.57(7) | C(10)-C(11)-C(12)   | 120.63(8) |
| C(3)-C(2)-C(1)  | 60.97(6)  | C(6)-C(11)-C(12)    | 120.84(8) |
| C(5)-C(2)-H(2)  | 119.3(8)  | N(12)-C(12)-C(11)   | 113.26(7) |
| C(3)-C(2)-H(2)  | 123.8(8)  | N(12)-C(12)-H(12A)  | 110.8(8)  |
| C(1)-C(2)-H(2)  | 119.2(8)  | C(11)-C(12)-H(12A)  | 108.6(8)  |
| C(4)-C(3)-C(2)  | 106.49(7) | N(12)-C(12)-H(12B)  | 107.2(8)  |
| C(4)-C(3)-C(1)  | 117.14(7) | C(11)-C(12)-H(12B)  | 109.9(8)  |
| C(2)-C(3)-C(1)  | 60.29(6)  | H(12A)-C(12)-H(12B) | 106.9(11) |
| C(4)-C(3)-H(3)  | 118.7(8)  | C(12)-N(12)-C(16)   | 112.01(7) |
| C(2)-C(3)-H(3)  | 123.1(8)  | C(12)-N(12)-C(13)   | 109.32(7) |
| C(1)-C(3)-H(3)  | 117.8(8)  | C(16)-N(12)-C(13)   | 108.80(7) |
| O(4)-C(4)-N(4)  | 125.14(9) | N(12)-C(13)-C(14)   | 109.99(8) |
| O(4)-C(4)-C(3)  | 127.46(9) | N(12)-C(13)-H(13A)  | 109.3(8)  |
| N(4)-C(4)-C(3)  | 107.40(8) | C(14)-C(13)-H(13A)  | 108.2(8)  |
| C(4)-N(4)-C(5)  | 112.57(8) | N(12)-C(13)-H(13B)  | 112.0(8)  |
| C(4)-N(4)-C(23) | 124.48(8) | C(14)-C(13)-H(13B)  | 108.8(8)  |
| C(5)-N(4)-C(23) | 122.92(8) | H(13A)-C(13)-H(13B) | 108.5(12) |
| O(5)-C(5)-N(4)  | 124.52(9) | O(14)-C(14)-C(13)   | 111.77(8) |
| O(5)-C(5)-C(2)  | 127.58(9) | O(14)-C(14)-H(14A)  | 106.7(9)  |
| N(4)-C(5)-C(2)  | 107.89(8) | C(13)-C(14)-H(14A)  | 110.0(9)  |
| C(7)-C(6)-C(11) | 119.74(8) | O(14)-C(14)-H(14B)  | 109.1(9)  |
| C(7)-C(6)-C(1)  | 120.31(8) | C(13)-C(14)-H(14B)  | 108.5(9)  |
| C(11)-C(6)-C(1) | 119.94(8) | H(14A)-C(14)-H(14B) | 110.7(13) |
| C(8)-C(7)-C(6)  | 121.03(9) | C(15)-O(14)-C(14)   | 109.44(8) |
| C(8)-C(7)-H(7)  | 119.7(8)  | O(14)-C(15)-C(16)   | 111.14(8) |
| C(6)-C(7)-H(7)  | 119.2(8)  | O(14)-C(15)-H(15A)  | 109.6(8)  |
| C(9)-C(8)-C(7)  | 119.37(9) | C(16)-C(15)-H(15A)  | 109.8(8)  |
| C(9)-C(8)-H(8)  | 120.2(8)  | O(14)-C(15)-H(15B)  | 105.7(8)  |
| C(7)-C(8)-H(8)  | 120.4(8)  | C(16)-C(15)-H(15B)  | 111.4(9)  |
| C(8)-C(9)-C(10) | 120.00(9) | H(15A)-C(15)-H(15B) | 109.1(12) |
| C(8)-C(9)-H(9)  | 120.7(9)  | N(12)-C(16)-C(15)   | 109.42(8) |
| C(10)-C(9)-H(9) | 119.3(9)  | N(12)-C(16)-H(16A)  | 111.5(8)  |



|                     |           |                   |            |
|---------------------|-----------|-------------------|------------|
| C(15)-C(16)-H(16A)  | 110.8(8)  | C(21)-C(22)-H(22) | 119.0(8)   |
| N(12)-C(16)-H(16B)  | 108.8(8)  | C(17)-C(22)-H(22) | 120.3(8)   |
| C(15)-C(16)-H(16B)  | 110.8(8)  | C(28)-C(23)-C(24) | 121.19(9)  |
| H(16A)-C(16)-H(16B) | 105.6(11) | C(28)-C(23)-N(4)  | 119.16(9)  |
| C(18)-C(17)-C(22)   | 118.52(8) | C(24)-C(23)-N(4)  | 119.61(8)  |
| C(18)-C(17)-C(1)    | 121.46(8) | C(23)-C(24)-C(25) | 119.04(10) |
| C(22)-C(17)-C(1)    | 119.93(8) | C(23)-C(24)-H(24) | 119.7(9)   |
| C(19)-C(18)-C(17)   | 120.49(9) | C(25)-C(24)-H(24) | 121.3(9)   |
| C(19)-C(18)-H(18)   | 119.1(9)  | C(26)-C(25)-C(24) | 120.44(11) |
| C(17)-C(18)-H(18)   | 120.4(9)  | C(26)-C(25)-H(25) | 118.9(11)  |
| C(20)-C(19)-C(18)   | 120.68(9) | C(24)-C(25)-H(25) | 120.7(11)  |
| C(20)-C(19)-H(19)   | 120.2(9)  | C(27)-C(26)-C(25) | 119.64(10) |
| C(18)-C(19)-H(19)   | 119.1(9)  | C(27)-C(26)-H(26) | 121.5(10)  |
| C(19)-C(20)-C(21)   | 119.35(9) | C(25)-C(26)-H(26) | 118.9(10)  |
| C(19)-C(20)-H(20)   | 119.6(9)  | C(26)-C(27)-C(28) | 120.79(10) |
| C(21)-C(20)-H(20)   | 121.0(9)  | C(26)-C(27)-H(27) | 120.0(9)   |
| C(20)-C(21)-C(22)   | 120.23(9) | C(28)-C(27)-H(27) | 119.2(9)   |
| C(20)-C(21)-H(21)   | 120.2(9)  | C(23)-C(28)-C(27) | 118.90(10) |
| C(22)-C(21)-H(21)   | 119.6(9)  | C(23)-C(28)-H(28) | 119.2(9)   |
| C(21)-C(22)-C(17)   | 120.74(9) | C(27)-C(28)-H(28) | 122.0(9)   |

---

Symmetry transformations used to generate equivalent atoms:

Table 4. Anisotropic displacement parameters ( $\text{\AA}^2 \times 10^3$ ) for JF3055FMI. The anisotropic displacement factor exponent takes the form:  $-2\pi^2 [ h^2 a^{*2} U^{11} + \dots + 2 h k a^* b^* U^{12} ]$

|       | U <sup>11</sup> | U <sup>22</sup> | U <sup>33</sup> | U <sup>23</sup> | U <sup>13</sup> | U <sup>12</sup> |
|-------|-----------------|-----------------|-----------------|-----------------|-----------------|-----------------|
| C(1)  | 14(1)           | 11(1)           | 13(1)           | 1(1)            | 2(1)            | 0(1)            |
| C(2)  | 16(1)           | 15(1)           | 13(1)           | 1(1)            | 2(1)            | 0(1)            |
| C(3)  | 17(1)           | 12(1)           | 16(1)           | 1(1)            | 1(1)            | 1(1)            |
| C(4)  | 20(1)           | 13(1)           | 15(1)           | 3(1)            | 1(1)            | 1(1)            |
| N(4)  | 16(1)           | 16(1)           | 16(1)           | 0(1)            | -1(1)           | 2(1)            |
| O(4)  | 21(1)           | 19(1)           | 21(1)           | 1(1)            | 2(1)            | 6(1)            |
| C(5)  | 17(1)           | 18(1)           | 14(1)           | 2(1)            | 1(1)            | 1(1)            |
| O(5)  | 23(1)           | 27(1)           | 17(1)           | -6(1)           | 0(1)            | 4(1)            |
| C(6)  | 14(1)           | 12(1)           | 14(1)           | 1(1)            | 1(1)            | -1(1)           |
| C(7)  | 16(1)           | 15(1)           | 18(1)           | 0(1)            | 3(1)            | 1(1)            |
| C(8)  | 14(1)           | 20(1)           | 25(1)           | 2(1)            | 5(1)            | 0(1)            |
| C(9)  | 15(1)           | 18(1)           | 30(1)           | 4(1)            | 2(1)            | -2(1)           |
| C(10) | 16(1)           | 13(1)           | 27(1)           | 1(1)            | 2(1)            | -1(1)           |
| C(11) | 13(1)           | 13(1)           | 18(1)           | 0(1)            | 2(1)            | 0(1)            |
| C(12) | 16(1)           | 12(1)           | 22(1)           | 0(1)            | 5(1)            | 1(1)            |
| N(12) | 16(1)           | 12(1)           | 16(1)           | -1(1)           | 1(1)            | 2(1)            |
| C(13) | 22(1)           | 17(1)           | 15(1)           | -1(1)           | 4(1)            | 4(1)            |
| C(14) | 33(1)           | 20(1)           | 19(1)           | -2(1)           | 2(1)            | 11(1)           |
| O(14) | 24(1)           | 24(1)           | 21(1)           | 2(1)            | 2(1)            | 10(1)           |
| C(15) | 21(1)           | 20(1)           | 21(1)           | 4(1)            | 1(1)            | 4(1)            |
| C(16) | 16(1)           | 18(1)           | 15(1)           | 0(1)            | 2(1)            | 1(1)            |
| C(17) | 15(1)           | 11(1)           | 14(1)           | -1(1)           | 2(1)            | 1(1)            |
| C(18) | 17(1)           | 15(1)           | 19(1)           | 1(1)            | 2(1)            | -2(1)           |
| C(19) | 16(1)           | 17(1)           | 26(1)           | -3(1)           | 1(1)            | -1(1)           |
| C(20) | 18(1)           | 18(1)           | 22(1)           | -6(1)           | -3(1)           | 4(1)            |
| C(21) | 23(1)           | 18(1)           | 16(1)           | 0(1)            | -1(1)           | 4(1)            |
| C(22) | 20(1)           | 15(1)           | 16(1)           | 1(1)            | 2(1)            | 0(1)            |
| C(23) | 16(1)           | 20(1)           | 15(1)           | 2(1)            | 1(1)            | 0(1)            |
| C(24) | 27(1)           | 21(1)           | 24(1)           | 5(1)            | -3(1)           | -3(1)           |
| C(25) | 28(1)           | 28(1)           | 30(1)           | 2(1)            | -2(1)           | -10(1)          |
| C(26) | 16(1)           | 41(1)           | 22(1)           | 0(1)            | 0(1)            | -5(1)           |

|       |       |       |       |      |      |      |
|-------|-------|-------|-------|------|------|------|
| C(27) | 16(1) | 35(1) | 23(1) | 8(1) | 1(1) | 4(1) |
| C(28) | 17(1) | 21(1) | 21(1) | 6(1) | 2(1) | 2(1) |

---

Table 5. Hydrogen coordinates ( $\times 10^4$ ) and isotropic displacement parameters ( $\text{\AA}^2 \times 10^{-3}$ ) for JF3055FMI.

|        | x         | y       | z        | U(eq) |
|--------|-----------|---------|----------|-------|
| H(2)   | 4117(17)  | 3199(6) | 3471(10) | 19(3) |
| H(3)   | 5695(17)  | 2408(7) | 2443(10) | 22(3) |
| H(7)   | 8375(17)  | 3399(7) | 1353(10) | 21(3) |
| H(8)   | 10175(18) | 4246(7) | 969(10)  | 22(3) |
| H(9)   | 9439(19)  | 5306(7) | 1348(11) | 26(3) |
| H(10)  | 6928(19)  | 5510(7) | 2109(11) | 28(4) |
| H(12A) | 3584(18)  | 4441(7) | 2289(10) | 20(3) |
| H(12B) | 4631(17)  | 4643(7) | 3331(11) | 21(3) |
| H(13A) | 2992(17)  | 5451(7) | 3803(11) | 22(3) |
| H(13B) | 1569(19)  | 5241(7) | 2921(11) | 25(3) |
| H(14A) | 1060(19)  | 6289(7) | 3378(12) | 29(4) |
| H(14B) | 3030(20)  | 6493(8) | 3241(12) | 34(4) |
| H(15A) | 3809(18)  | 6521(7) | 1567(11) | 24(3) |
| H(15B) | 2371(18)  | 6352(7) | 669(11)  | 24(3) |
| H(16A) | 2394(18)  | 5259(7) | 1156(11) | 23(3) |
| H(16B) | 4299(17)  | 5464(6) | 1002(10) | 17(3) |
| H(18)  | 2692(18)  | 2655(7) | 2243(11) | 26(3) |
| H(19)  | 440(20)   | 2432(8) | 1023(12) | 34(4) |
| H(20)  | 248(19)   | 2950(7) | -549(11) | 27(4) |
| H(21)  | 2390(20)  | 3681(7) | -895(12) | 32(4) |
| H(22)  | 4638(17)  | 3911(6) | 329(10)  | 19(3) |
| H(24)  | 9540(20)  | 4424(8) | 3992(12) | 33(4) |
| H(25)  | 12100(20) | 4713(9) | 5034(13) | 45(5) |
| H(26)  | 13620(20) | 3974(8) | 6052(12) | 34(4) |
| H(27)  | 12700(20) | 2899(7) | 6049(12) | 31(4) |
| H(28)  | 10189(19) | 2587(7) | 5023(11) | 27(3) |

Table 6. Torsion angles [°] for JF3055FMI.

|                       |             |                         |            |
|-----------------------|-------------|-------------------------|------------|
| C(6)-C(1)-C(2)-C(5)   | -16.09(11)  | C(3)-C(1)-C(6)-C(11)    | -135.86(9) |
| C(17)-C(1)-C(2)-C(5)  | -162.86(8)  | C(11)-C(6)-C(7)-C(8)    | 0.65(14)   |
| C(3)-C(1)-C(2)-C(5)   | 94.68(8)    | C(1)-C(6)-C(7)-C(8)     | 179.39(8)  |
| C(6)-C(1)-C(2)-C(3)   | -110.77(9)  | C(6)-C(7)-C(8)-C(9)     | 0.45(15)   |
| C(17)-C(1)-C(2)-C(3)  | 102.46(8)   | C(7)-C(8)-C(9)-C(10)    | -0.18(15)  |
| C(5)-C(2)-C(3)-C(4)   | 2.40(9)     | C(8)-C(9)-C(10)-C(11)   | -1.21(16)  |
| C(1)-C(2)-C(3)-C(4)   | 112.26(8)   | C(9)-C(10)-C(11)-C(6)   | 2.28(14)   |
| C(5)-C(2)-C(3)-C(1)   | -109.86(8)  | C(9)-C(10)-C(11)-C(12)  | -177.93(9) |
| C(6)-C(1)-C(3)-C(4)   | 12.27(12)   | C(7)-C(6)-C(11)-C(10)   | -1.98(13)  |
| C(17)-C(1)-C(3)-C(4)  | 157.54(8)   | C(1)-C(6)-C(11)-C(10)   | 179.27(8)  |
| C(2)-C(1)-C(3)-C(4)   | -94.28(9)   | C(7)-C(6)-C(11)-C(12)   | 178.23(8)  |
| C(6)-C(1)-C(3)-C(2)   | 106.55(9)   | C(1)-C(6)-C(11)-C(12)   | -0.52(13)  |
| C(17)-C(1)-C(3)-C(2)  | -108.18(8)  | C(10)-C(11)-C(12)-N(12) | 18.33(12)  |
| C(2)-C(3)-C(4)-O(4)   | 175.81(9)   | C(6)-C(11)-C(12)-N(12)  | -161.88(8) |
| C(1)-C(3)-C(4)-O(4)   | -119.60(10) | C(11)-C(12)-N(12)-C(16) | 70.90(10)  |
| C(2)-C(3)-C(4)-N(4)   | -4.02(9)    | C(11)-C(12)-N(12)-C(13) | -168.43(8) |
| C(1)-C(3)-C(4)-N(4)   | 60.57(10)   | C(12)-N(12)-C(13)-C(14) | 179.65(8)  |
| O(4)-C(4)-N(4)-C(5)   | -175.56(9)  | C(16)-N(12)-C(13)-C(14) | -57.75(10) |
| C(3)-C(4)-N(4)-C(5)   | 4.27(10)    | N(12)-C(13)-C(14)-O(14) | 58.01(12)  |
| O(4)-C(4)-N(4)-C(23)  | 2.86(15)    | C(13)-C(14)-O(14)-C(15) | -57.65(12) |
| C(3)-C(4)-N(4)-C(23)  | -177.31(8)  | C(14)-O(14)-C(15)-C(16) | 58.55(11)  |
| C(4)-N(4)-C(5)-O(5)   | 177.22(9)   | C(12)-N(12)-C(16)-C(15) | 179.62(7)  |
| C(23)-N(4)-C(5)-O(5)  | -1.23(15)   | C(13)-N(12)-C(16)-C(15) | 58.65(10)  |
| C(4)-N(4)-C(5)-C(2)   | -2.72(10)   | O(14)-C(15)-C(16)-N(12) | -60.03(10) |
| C(23)-N(4)-C(5)-C(2)  | 178.83(8)   | C(6)-C(1)-C(17)-C(18)   | -171.94(8) |
| C(3)-C(2)-C(5)-O(5)   | -179.91(9)  | C(2)-C(1)-C(17)-C(18)   | -24.46(12) |
| C(1)-C(2)-C(5)-O(5)   | 115.38(11)  | C(3)-C(1)-C(17)-C(18)   | 41.08(11)  |
| C(3)-C(2)-C(5)-N(4)   | 0.03(10)    | C(6)-C(1)-C(17)-C(22)   | 11.56(12)  |
| C(1)-C(2)-C(5)-N(4)   | -64.68(10)  | C(2)-C(1)-C(17)-C(22)   | 159.04(8)  |
| C(17)-C(1)-C(6)-C(7)  | -98.98(10)  | C(3)-C(1)-C(17)-C(22)   | -135.42(9) |
| C(2)-C(1)-C(6)-C(7)   | 114.05(10)  | C(22)-C(17)-C(18)-C(19) | 0.90(14)   |
| C(3)-C(1)-C(6)-C(7)   | 45.40(12)   | C(1)-C(17)-C(18)-C(19)  | -175.65(8) |
| C(17)-C(1)-C(6)-C(11) | 79.76(10)   | C(17)-C(18)-C(19)-C(20) | -0.61(14)  |
| C(2)-C(1)-C(6)-C(11)  | -67.21(11)  | C(18)-C(19)-C(20)-C(21) | 0.10(14)   |

|                         |            |
|-------------------------|------------|
| C(19)-C(20)-C(21)-C(22) | 0.10(14)   |
| C(20)-C(21)-C(22)-C(17) | 0.21(14)   |
| C(18)-C(17)-C(22)-C(21) | -0.70(14)  |
| C(1)-C(17)-C(22)-C(21)  | 175.90(8)  |
| C(4)-N(4)-C(23)-C(28)   | -59.92(13) |
| C(5)-N(4)-C(23)-C(28)   | 118.35(10) |
| C(4)-N(4)-C(23)-C(24)   | 122.43(11) |
| C(5)-N(4)-C(23)-C(24)   | -59.30(13) |
| C(28)-C(23)-C(24)-C(25) | -1.38(16)  |
| N(4)-C(23)-C(24)-C(25)  | 176.22(10) |
| C(23)-C(24)-C(25)-C(26) | 0.85(18)   |
| C(24)-C(25)-C(26)-C(27) | 0.13(18)   |
| C(25)-C(26)-C(27)-C(28) | -0.61(17)  |
| C(24)-C(23)-C(28)-C(27) | 0.91(15)   |
| N(4)-C(23)-C(28)-C(27)  | -176.71(9) |
| C(26)-C(27)-C(28)-C(23) | 0.10(16)   |

---

Symmetry transformations used to generate equivalent atoms:

Table 7. Hydrogen bonds for JF3055FMI [ $\text{\AA}$  and  $^\circ$ ].

| D-H...A               | d(D-H)    | d(H...A)  | d(D...A)   | $\angle$ (DHA) |
|-----------------------|-----------|-----------|------------|----------------|
| C(12)-H(12B)...O(5)   | 0.987(14) | 2.537(14) | 3.3684(12) | 141.8(11)      |
| C(13)-H(13A)...O(5)#1 | 0.963(14) | 2.414(14) | 3.2131(12) | 140.1(11)      |

Symmetry transformations used to generate equivalent atoms:

#1  $-x+1, -y+1, -z+1$

## Copy of NMR Spectra



PROTON CDCl3  
399.77 MHz

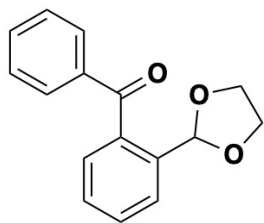

7.81  
7.79  
7.71  
7.69  
7.59  
7.57  
7.55  
7.54  
7.52  
7.50  
7.46  
7.45  
7.43  
7.41  
7.34  
7.32

6.02

3.89

0.00 TMS

F (m)  
7.44

D (d)  
7.70

C (d)  
7.80

G (d)  
7.33

E (m)  
7.55

A (s)  
6.02

B (s)  
3.89

2.00

1.01

2.07

3.00

1.00

1.00

4.00

9.5 9.0 8.5 8.0 7.5 7.0 6.5 6.0 5.5 5.0 4.5 4.0 3.5 3.0 2.5 2.0 1.5 1.0 0.5 0.0

f1 (ppm)

3200  
3000  
2800  
2600  
2400  
2200  
2000  
1800  
1600  
1400  
1200  
1000  
800  
600  
400  
200  
0  
-200

C13CPD CDCl3  
100.53 MHz

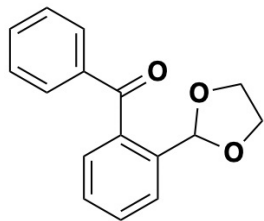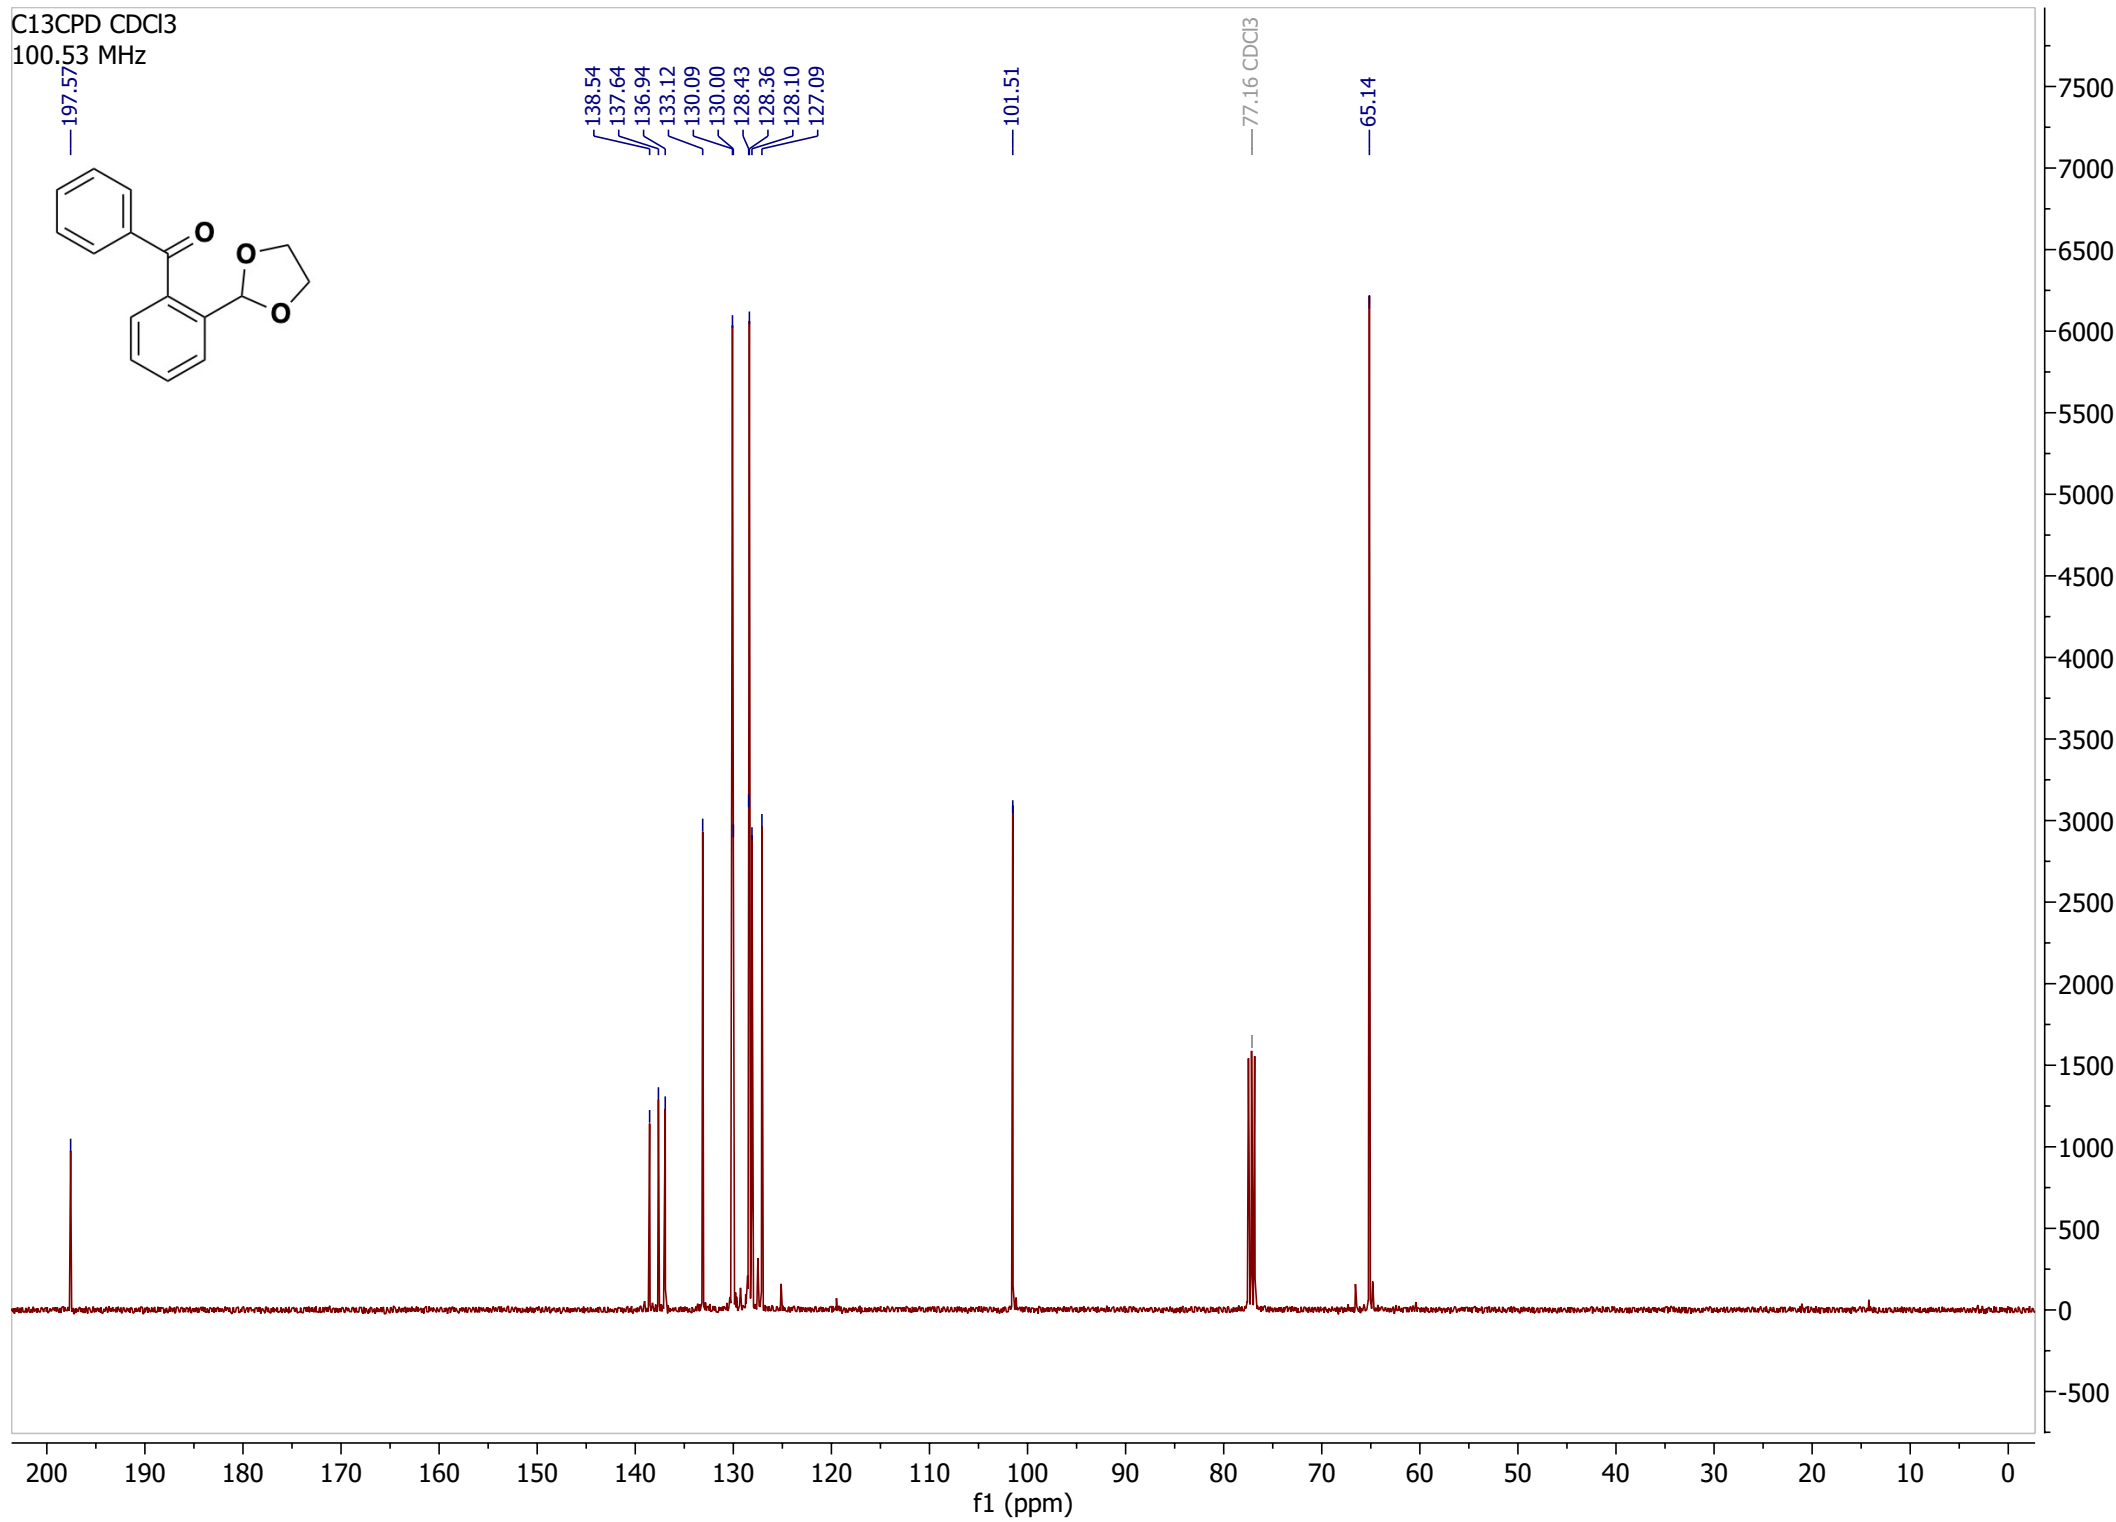

PROTON CDCl3

399.77 MHz

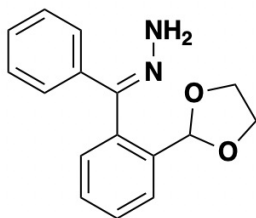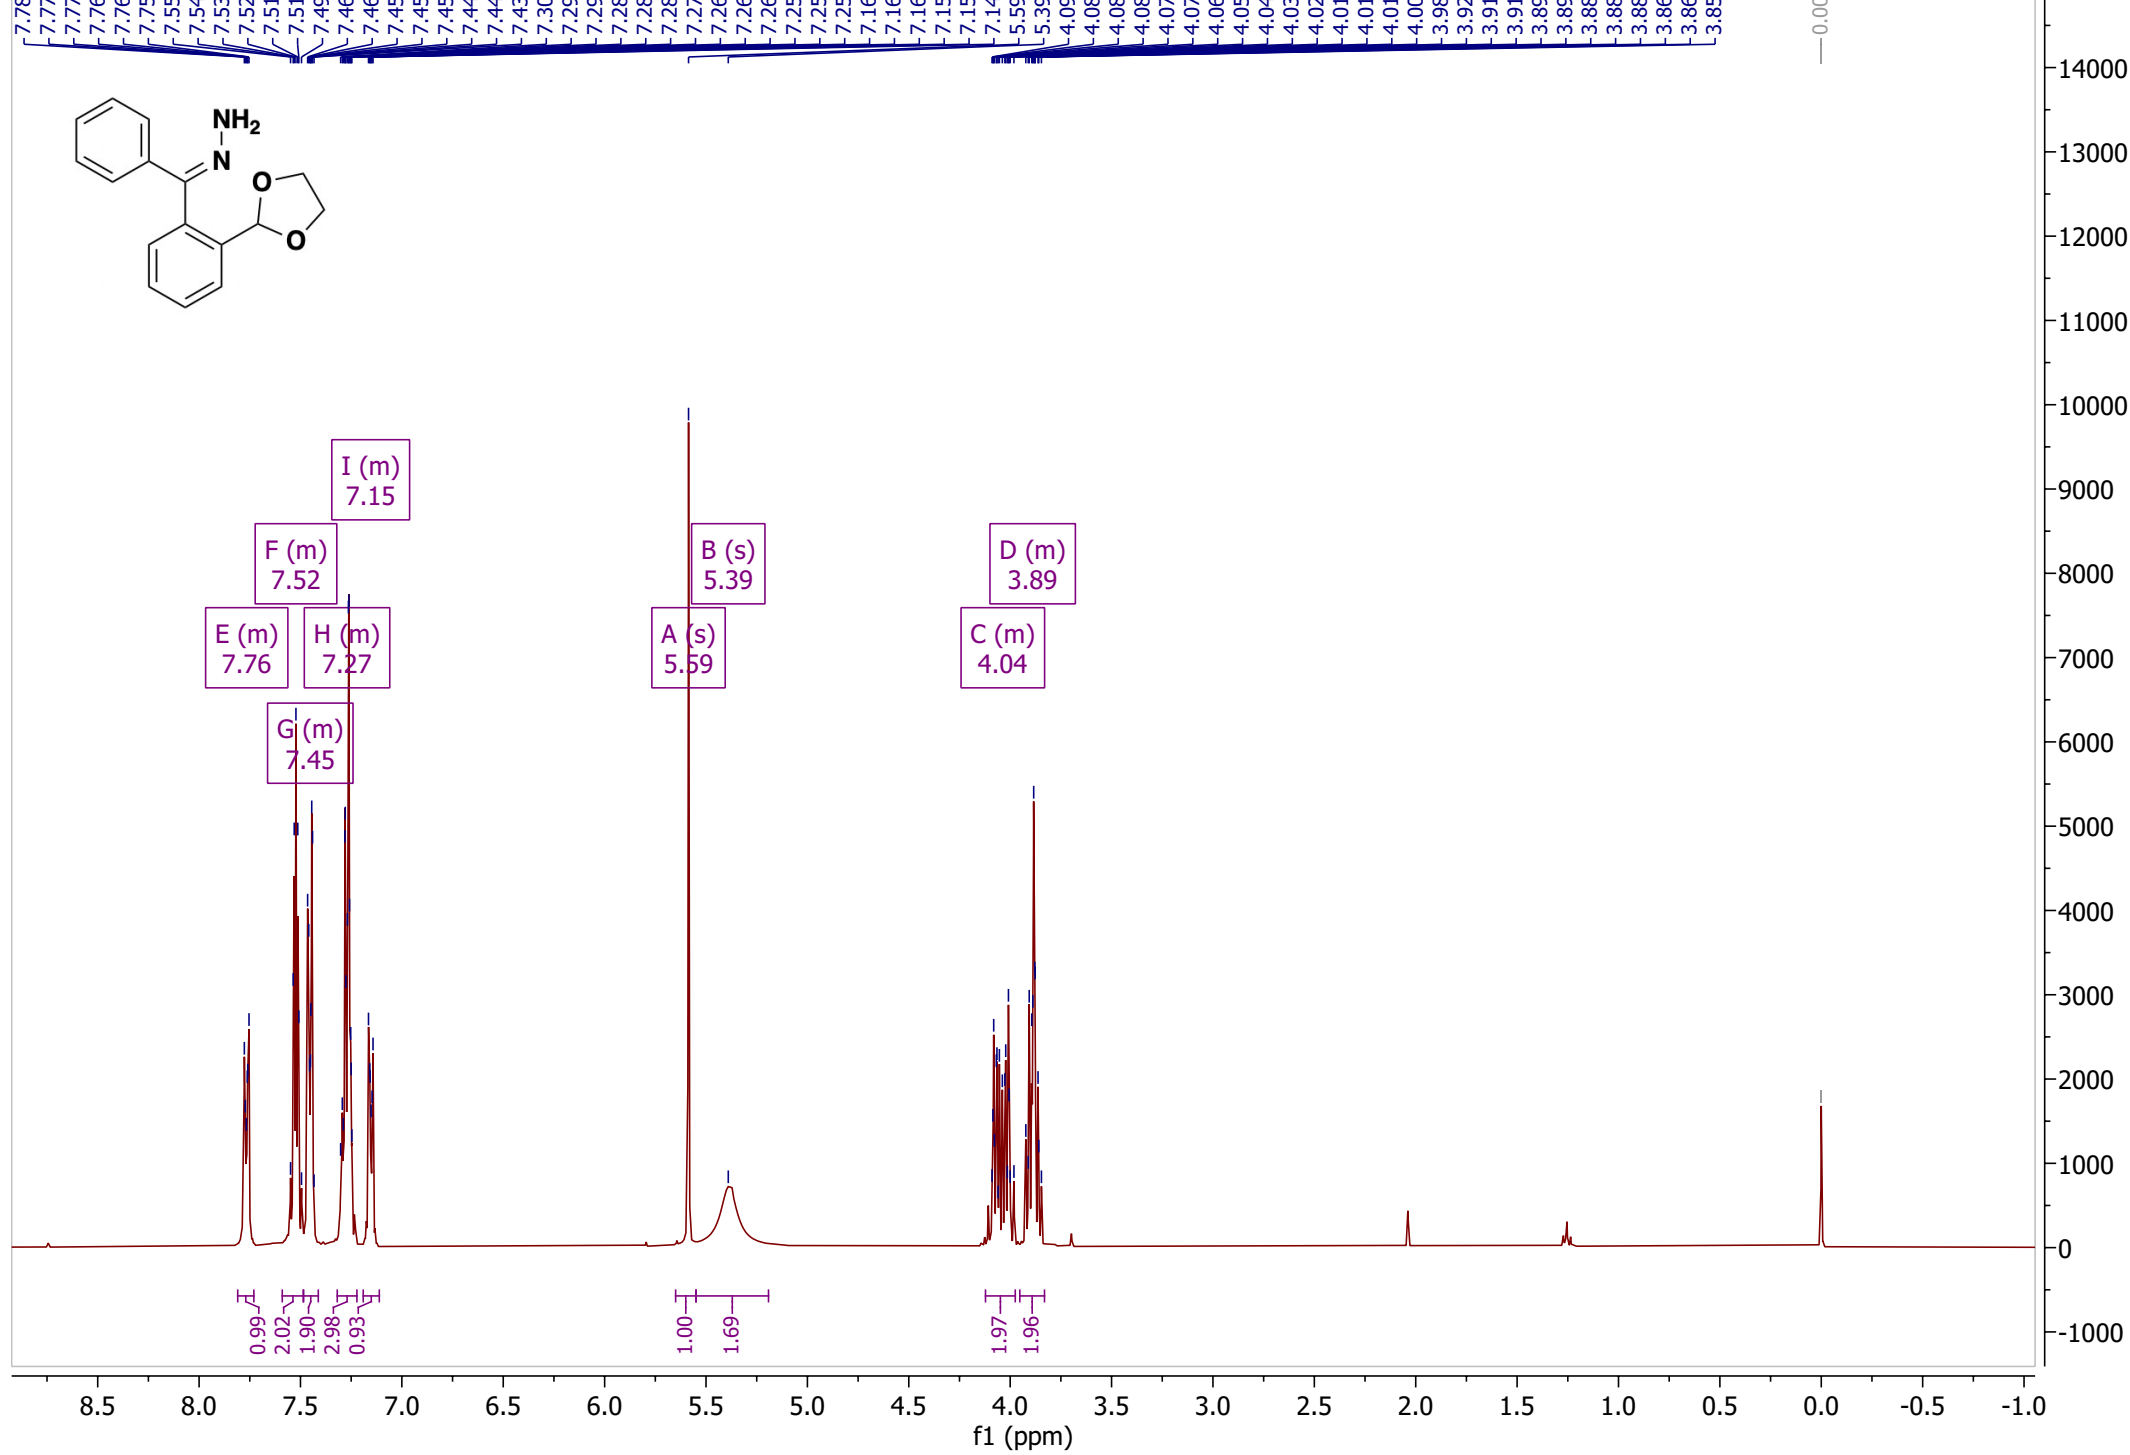

C13CPD CDCl3  
100.53 MHz

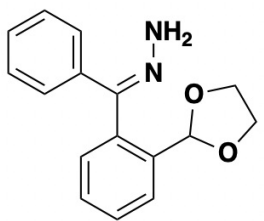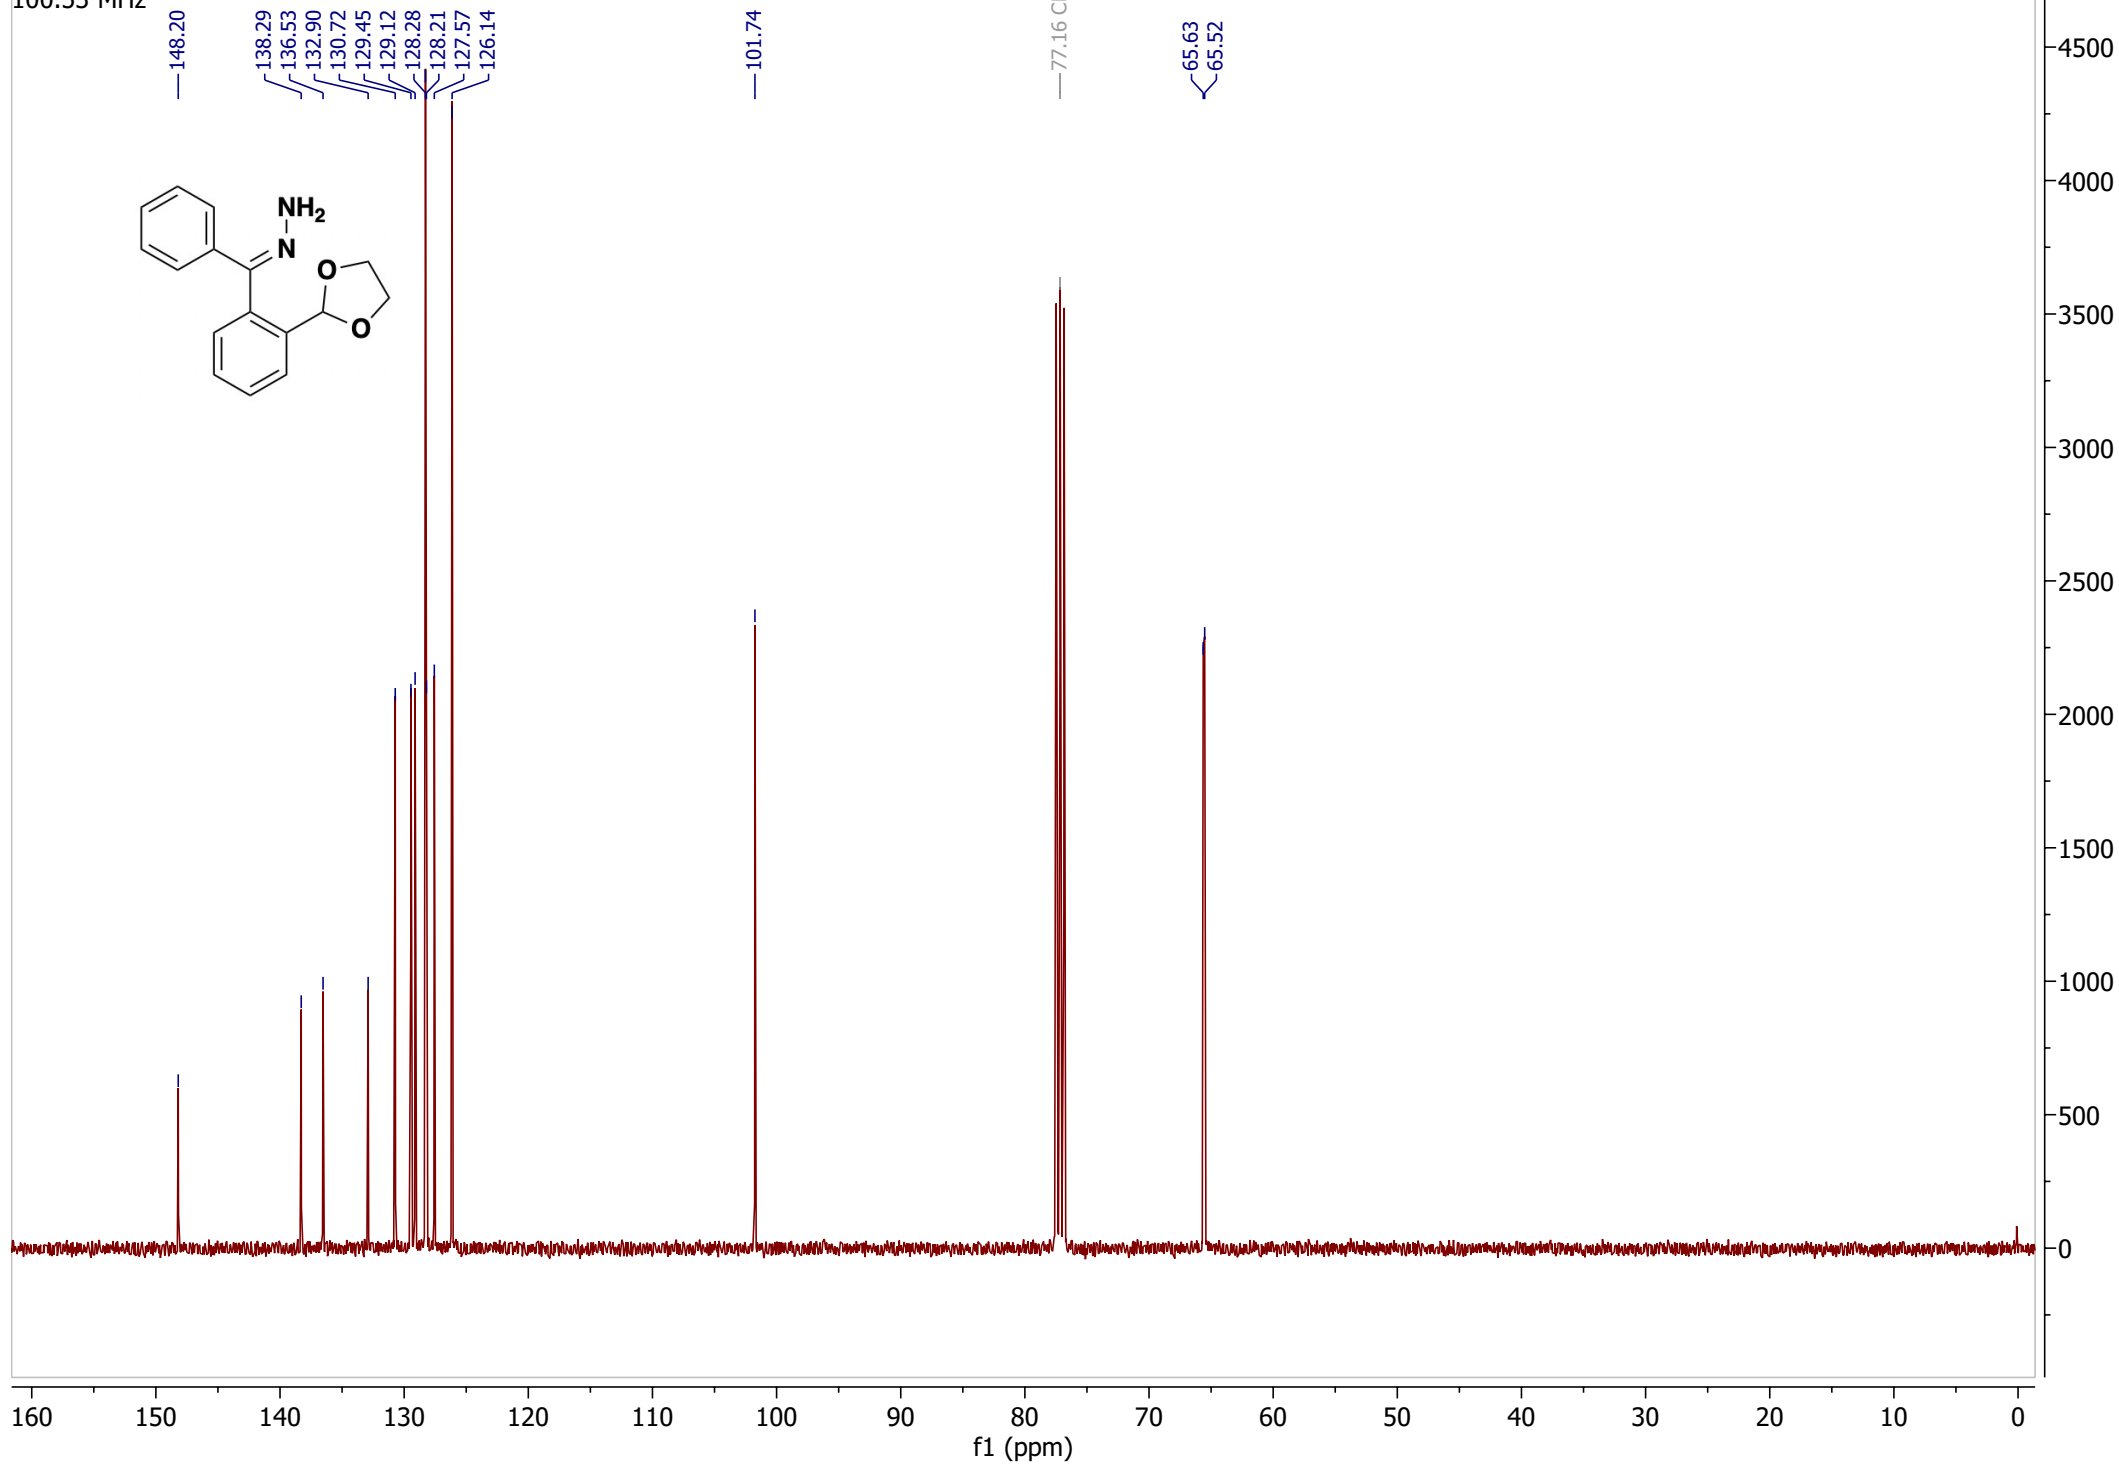

PROTON CDCl3

300.77 MHz

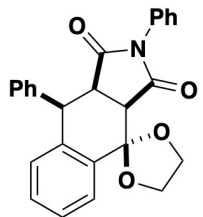

15a

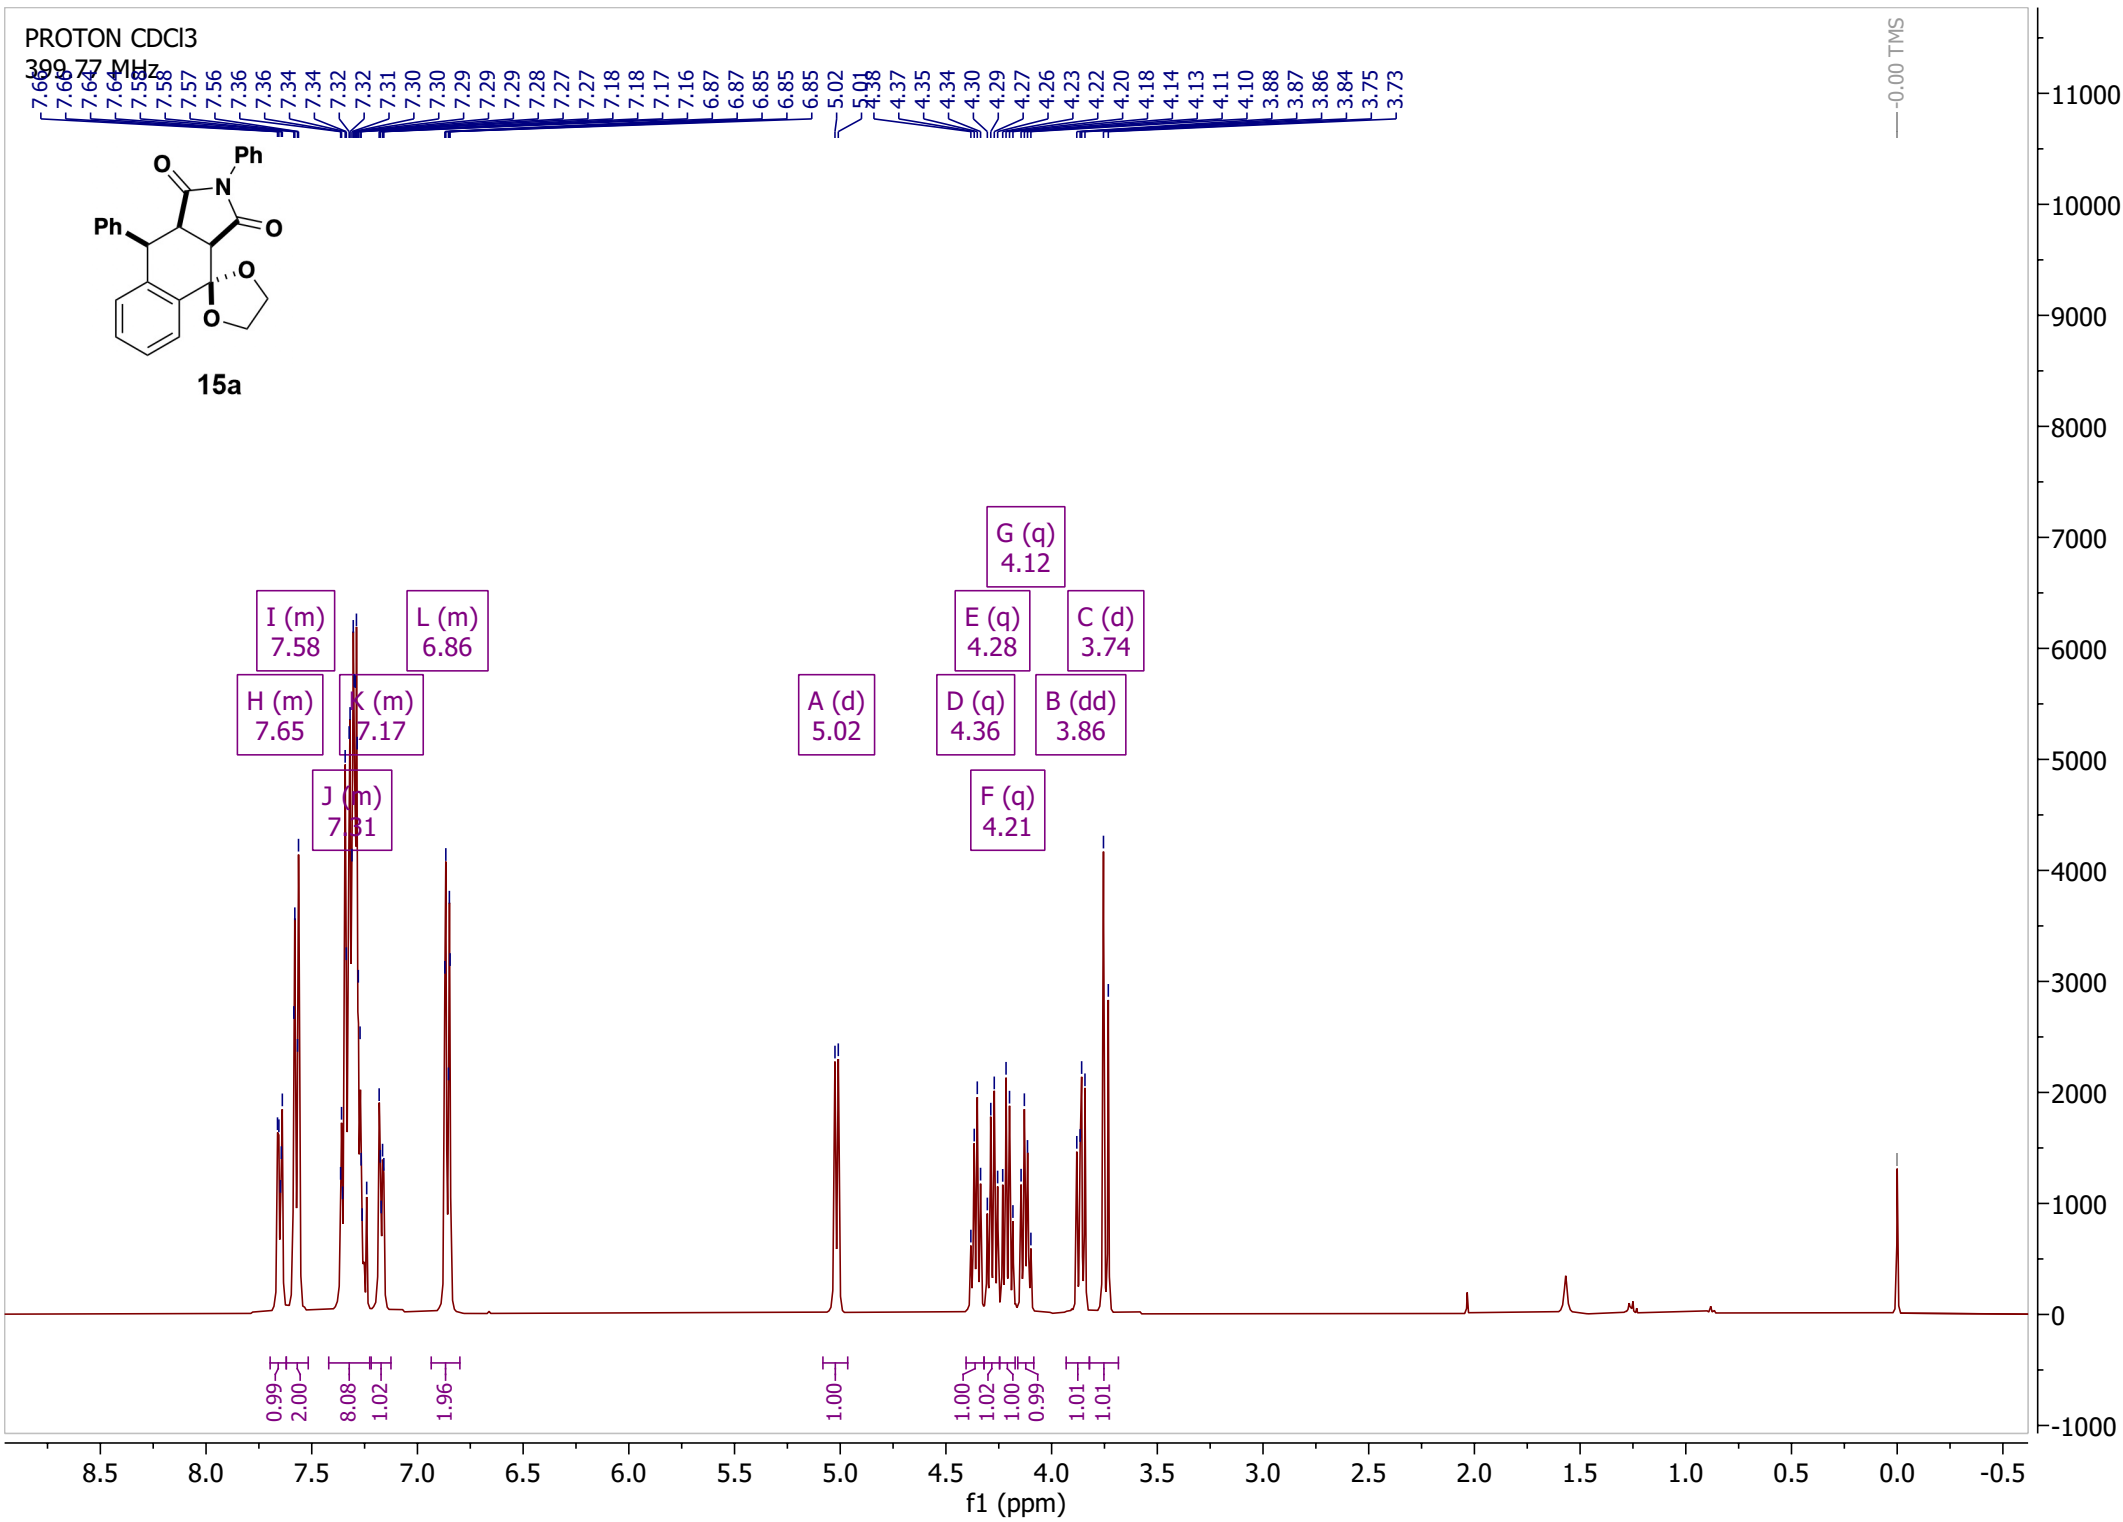

C13CPD CDCl3  
100.53 MHz

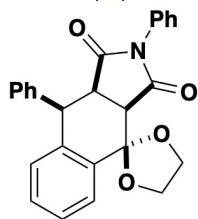

15a

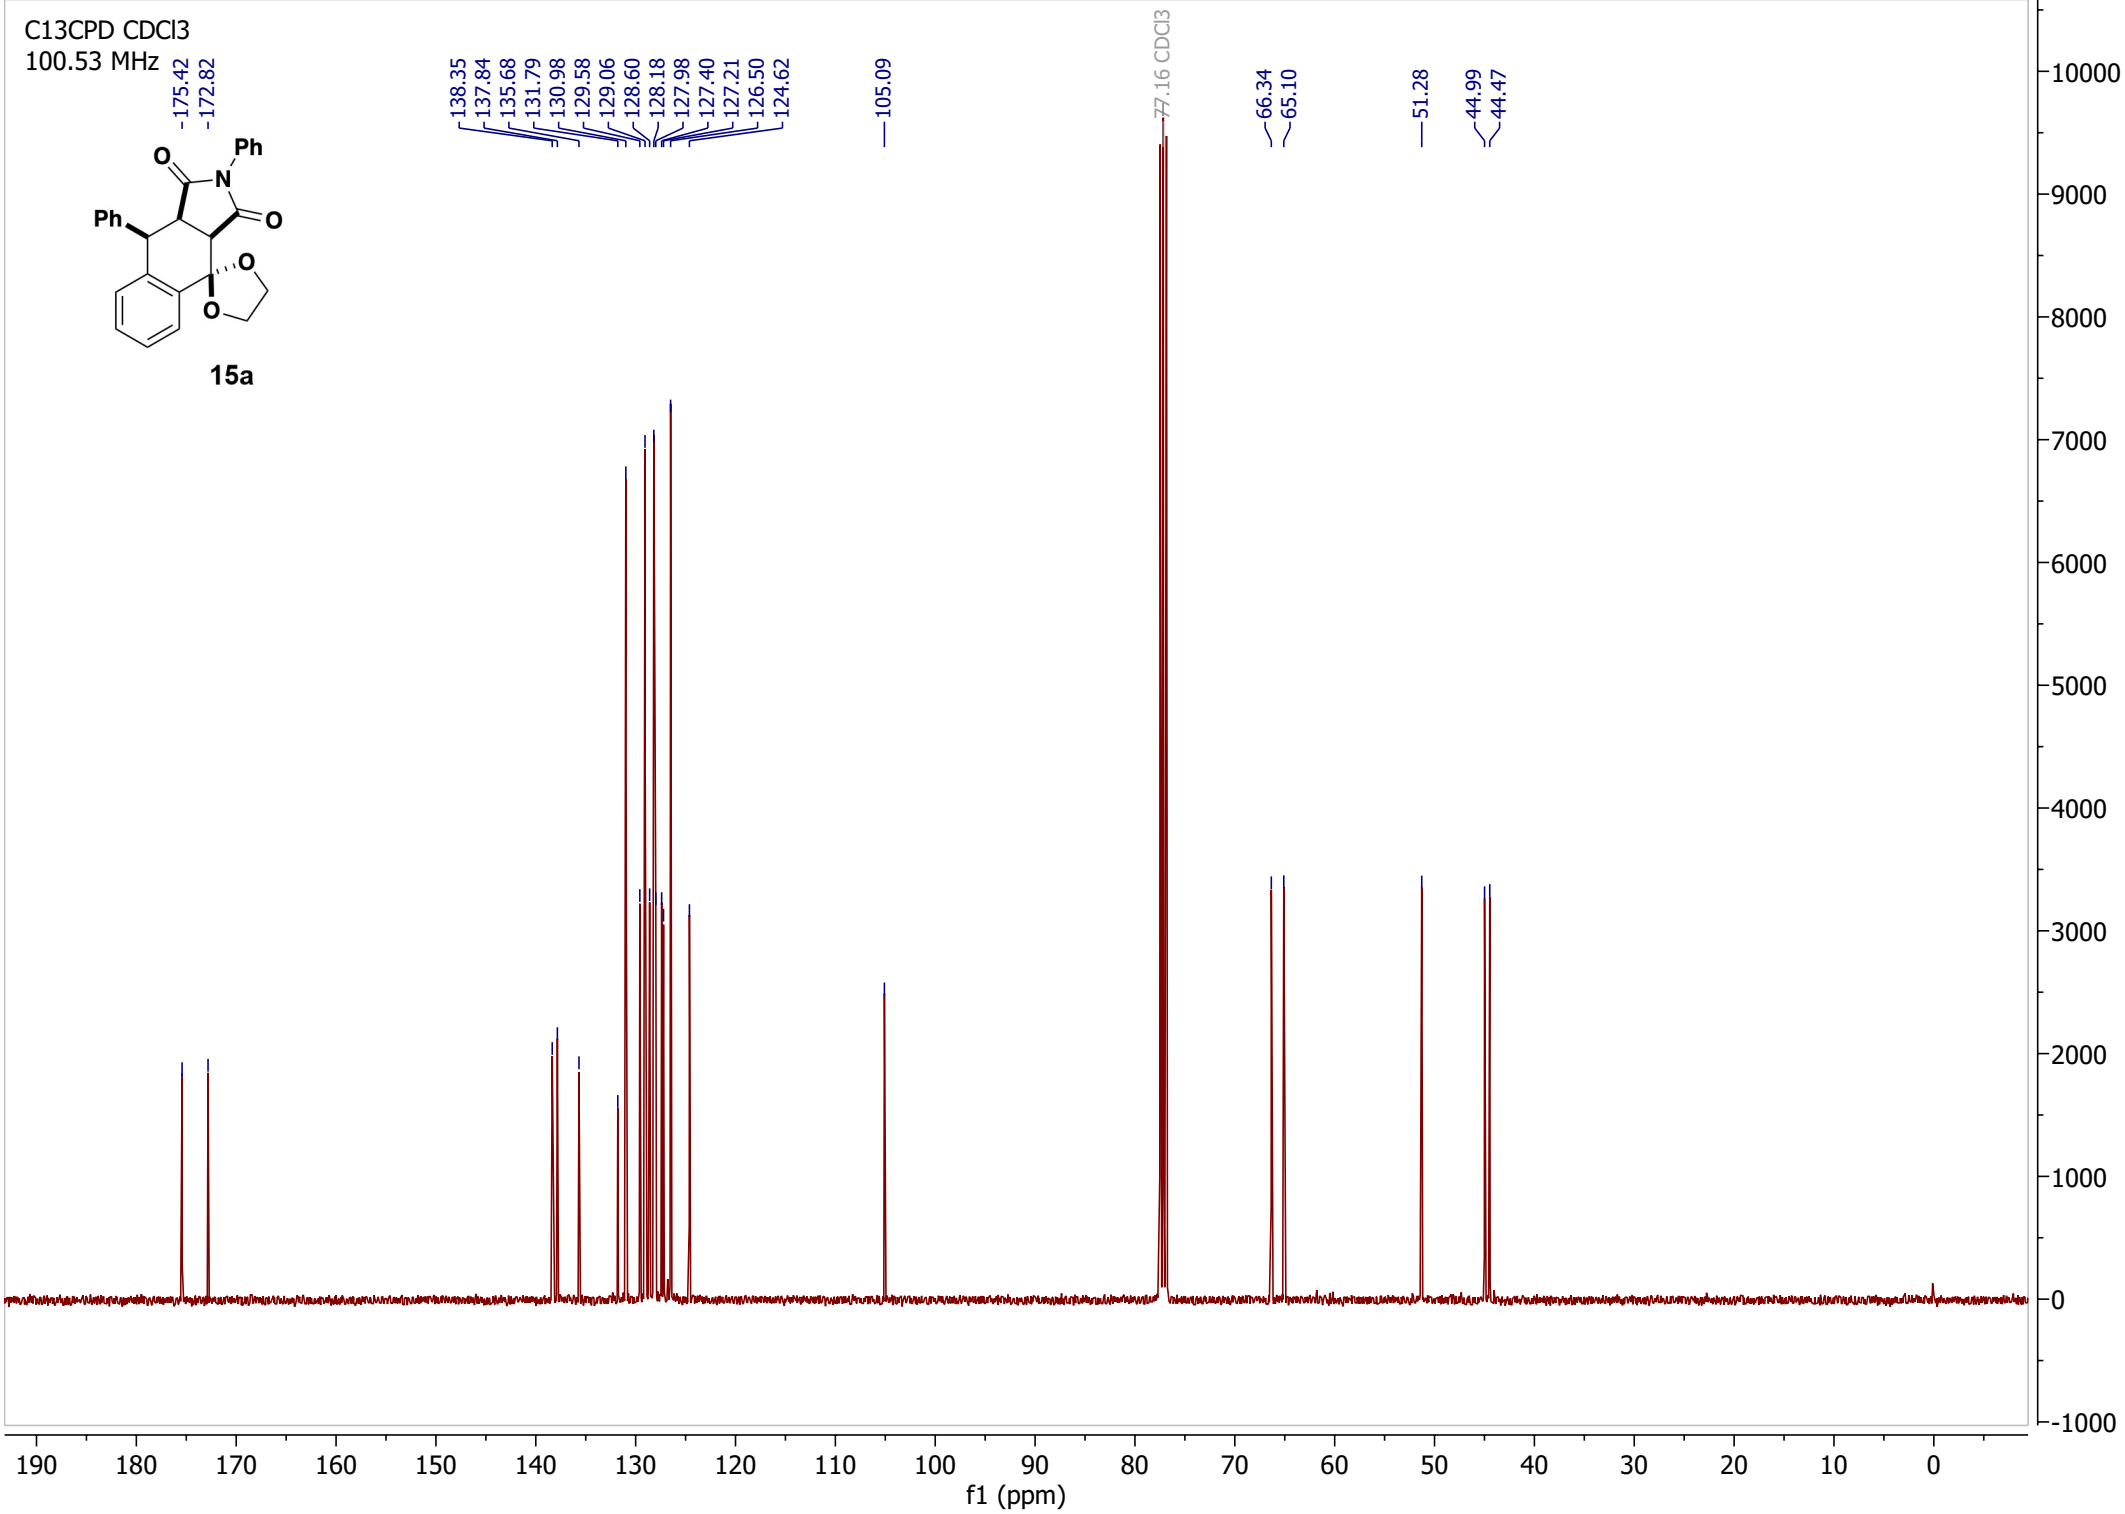

PROTON CDCl3

300.77 MHz

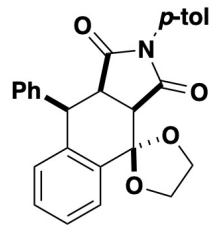

15b

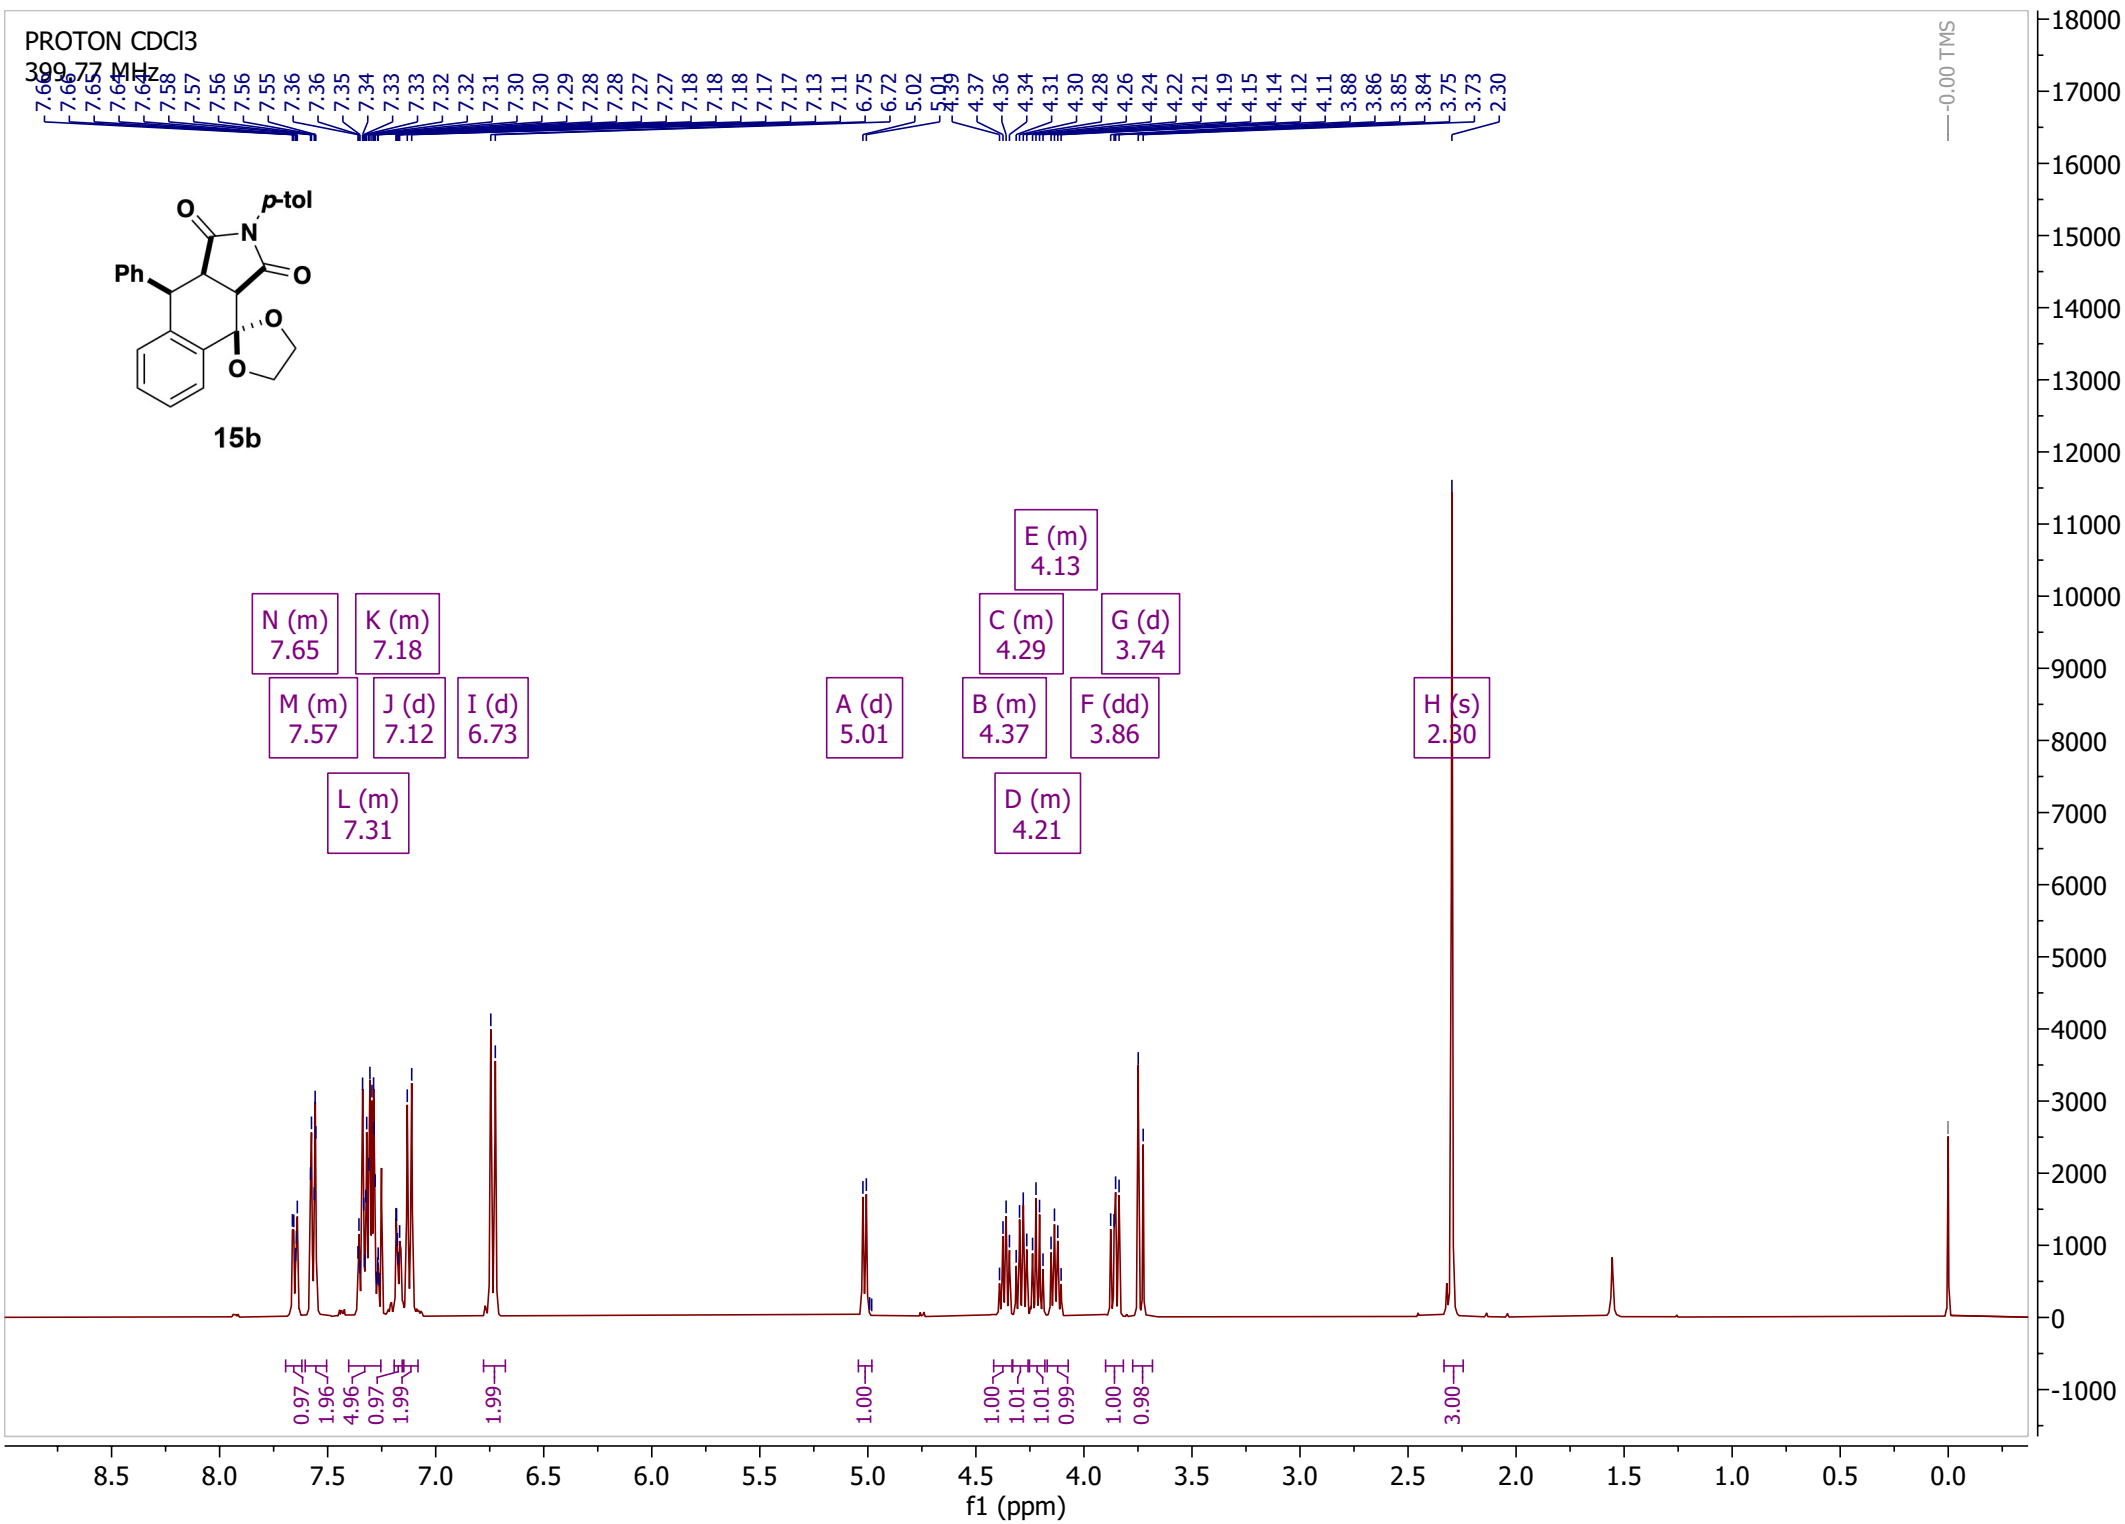

C13CPD CDCl3  
100.53 MHz

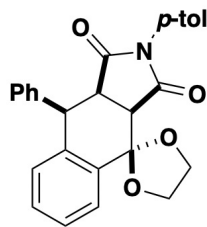

15b

138.65  
138.36  
137.87  
135.74  
131.04  
129.73  
129.58  
129.15  
128.18  
128.02  
127.40  
127.22  
126.28  
124.64

105.12

77.16 CDCl3

66.38

65.12

51.26

45.01

44.53

21.28

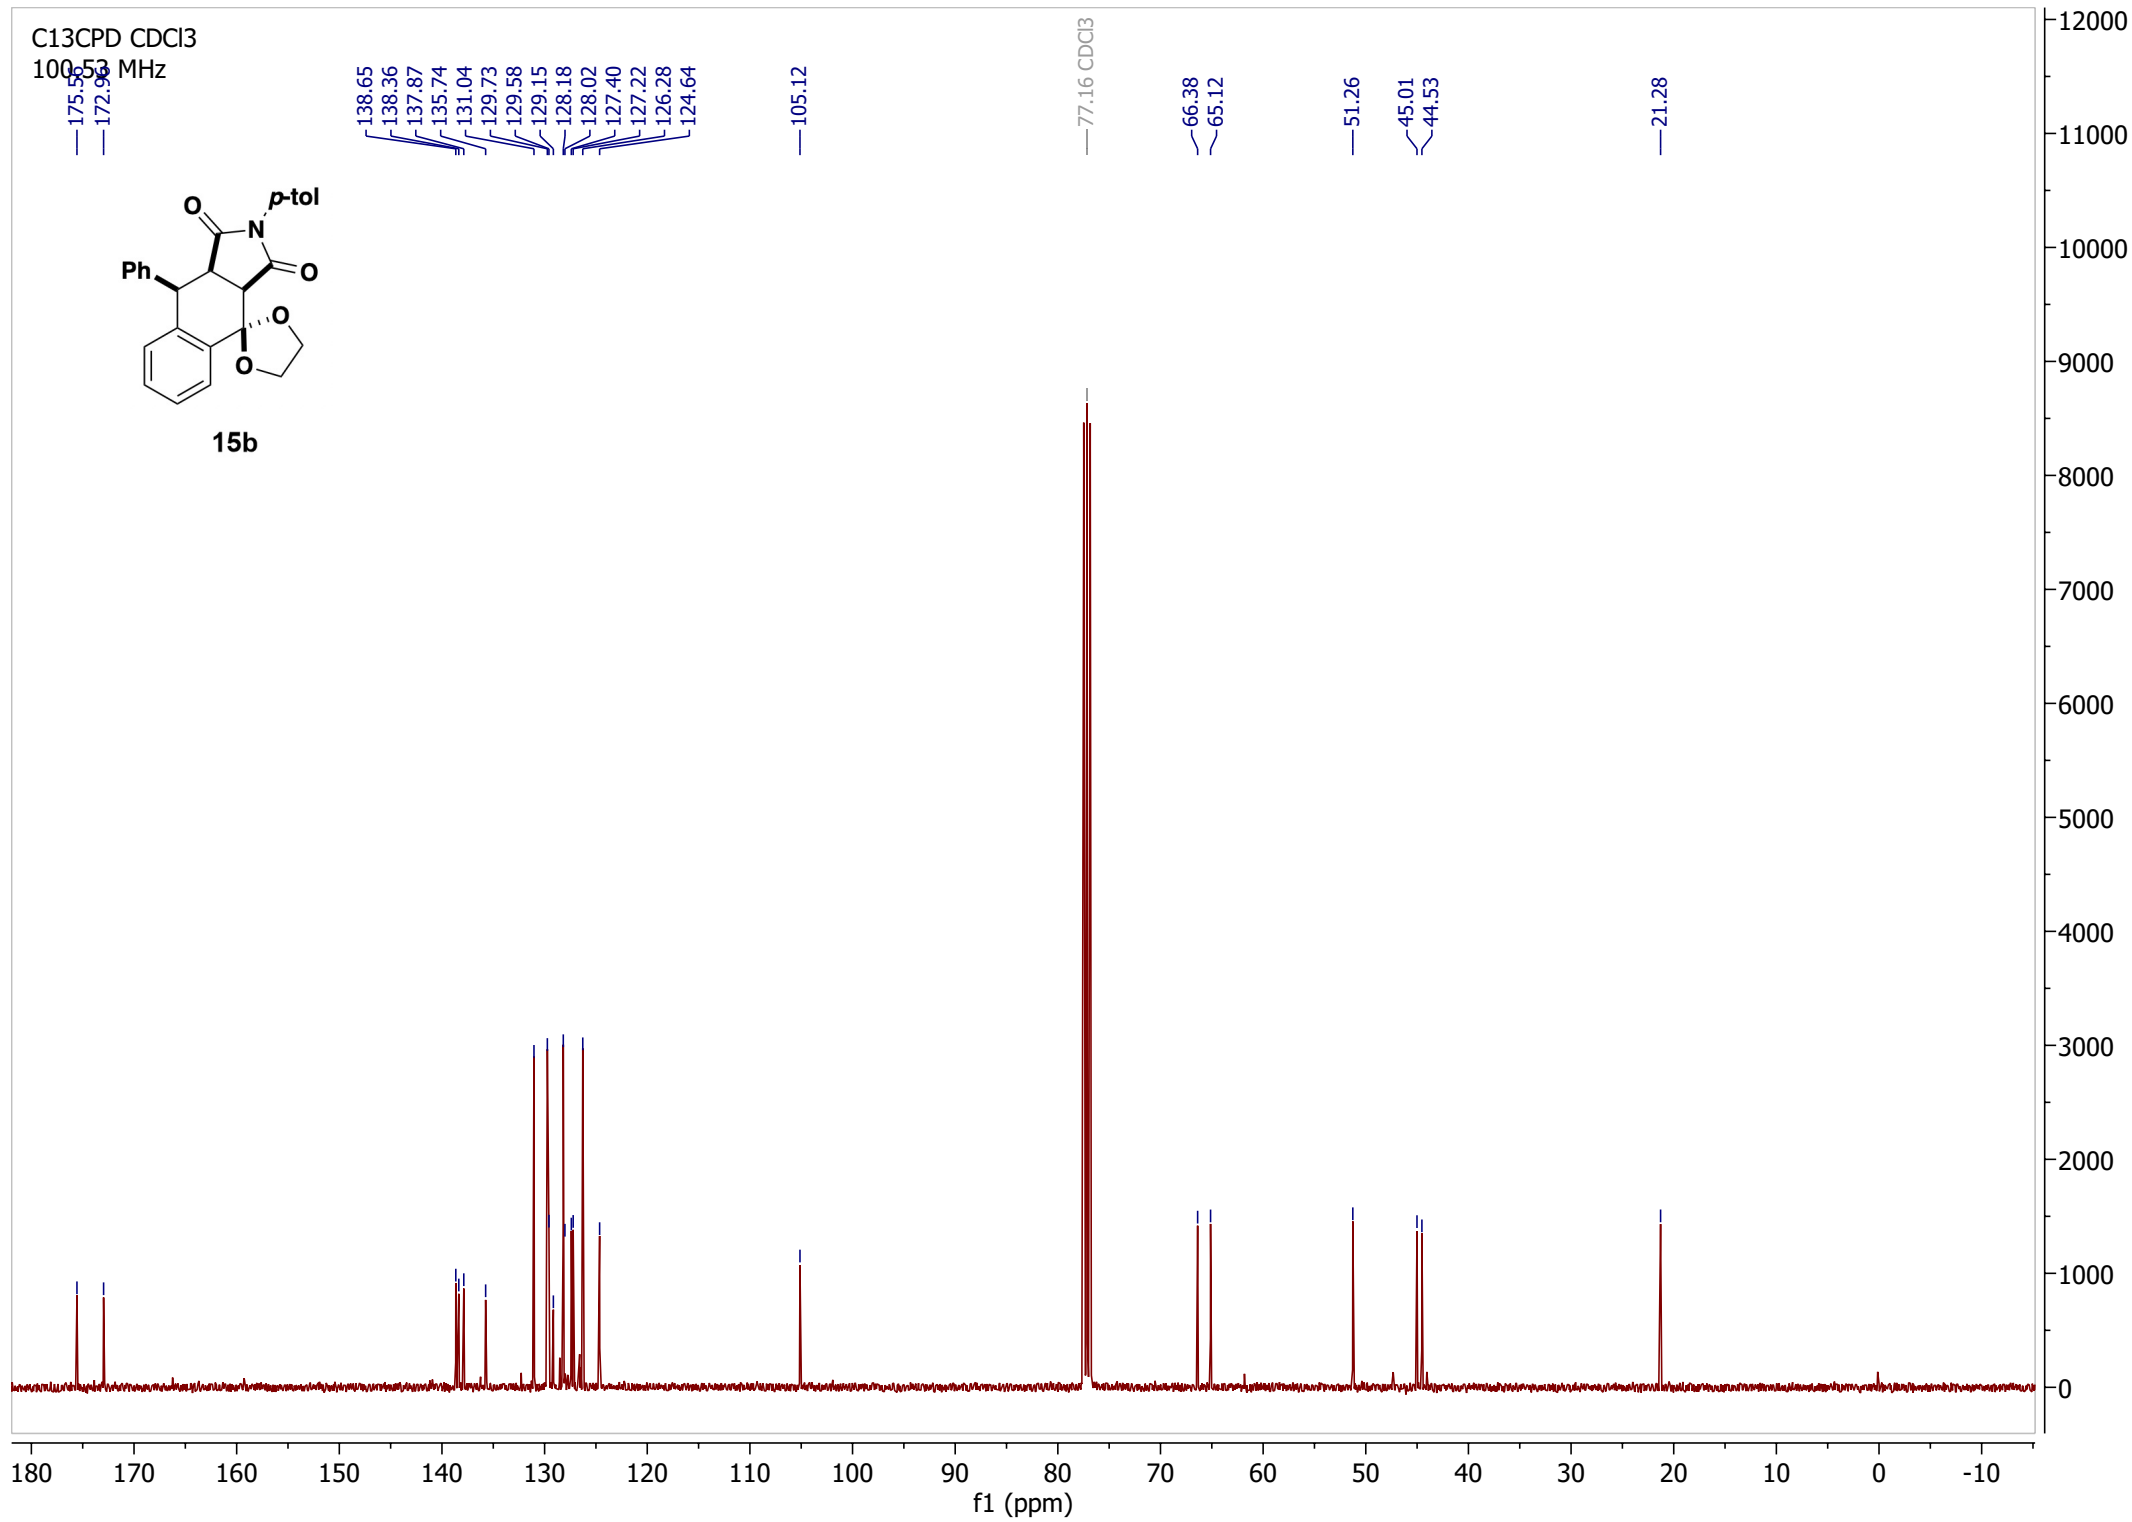



PROTON CDCl3

300.77 MHz

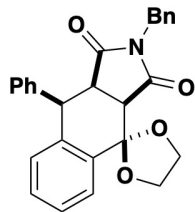

15c

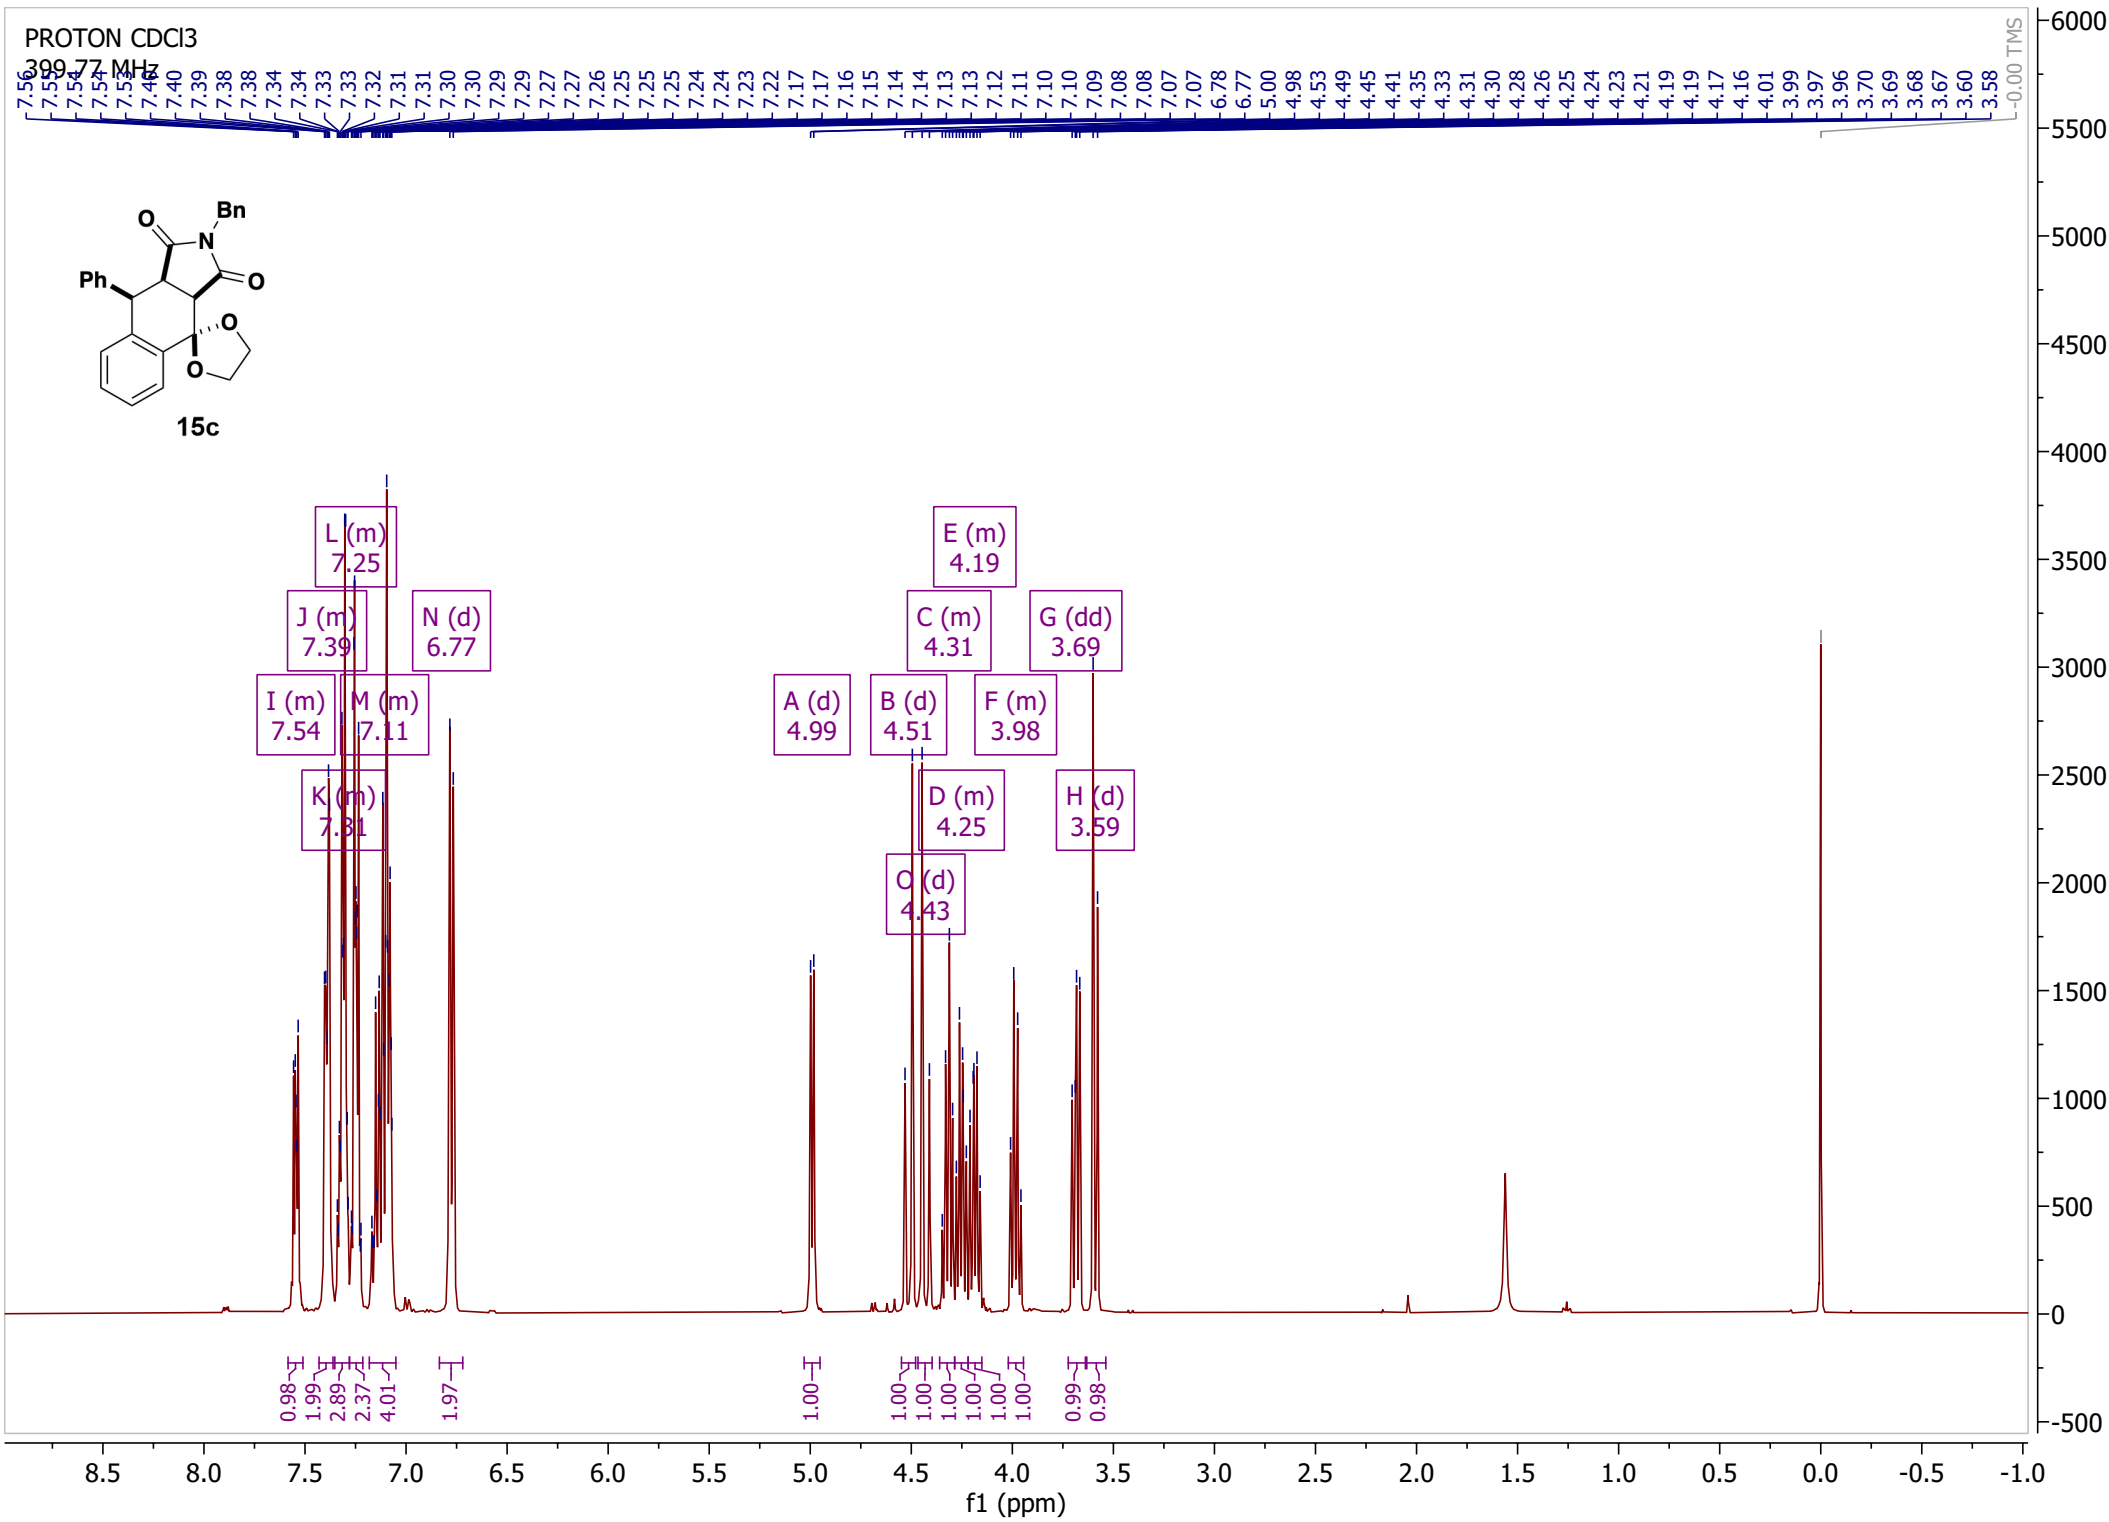

C13CPD CDCl3

100.53 MHz

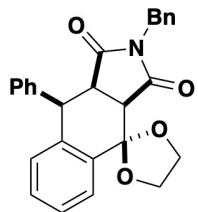

15c

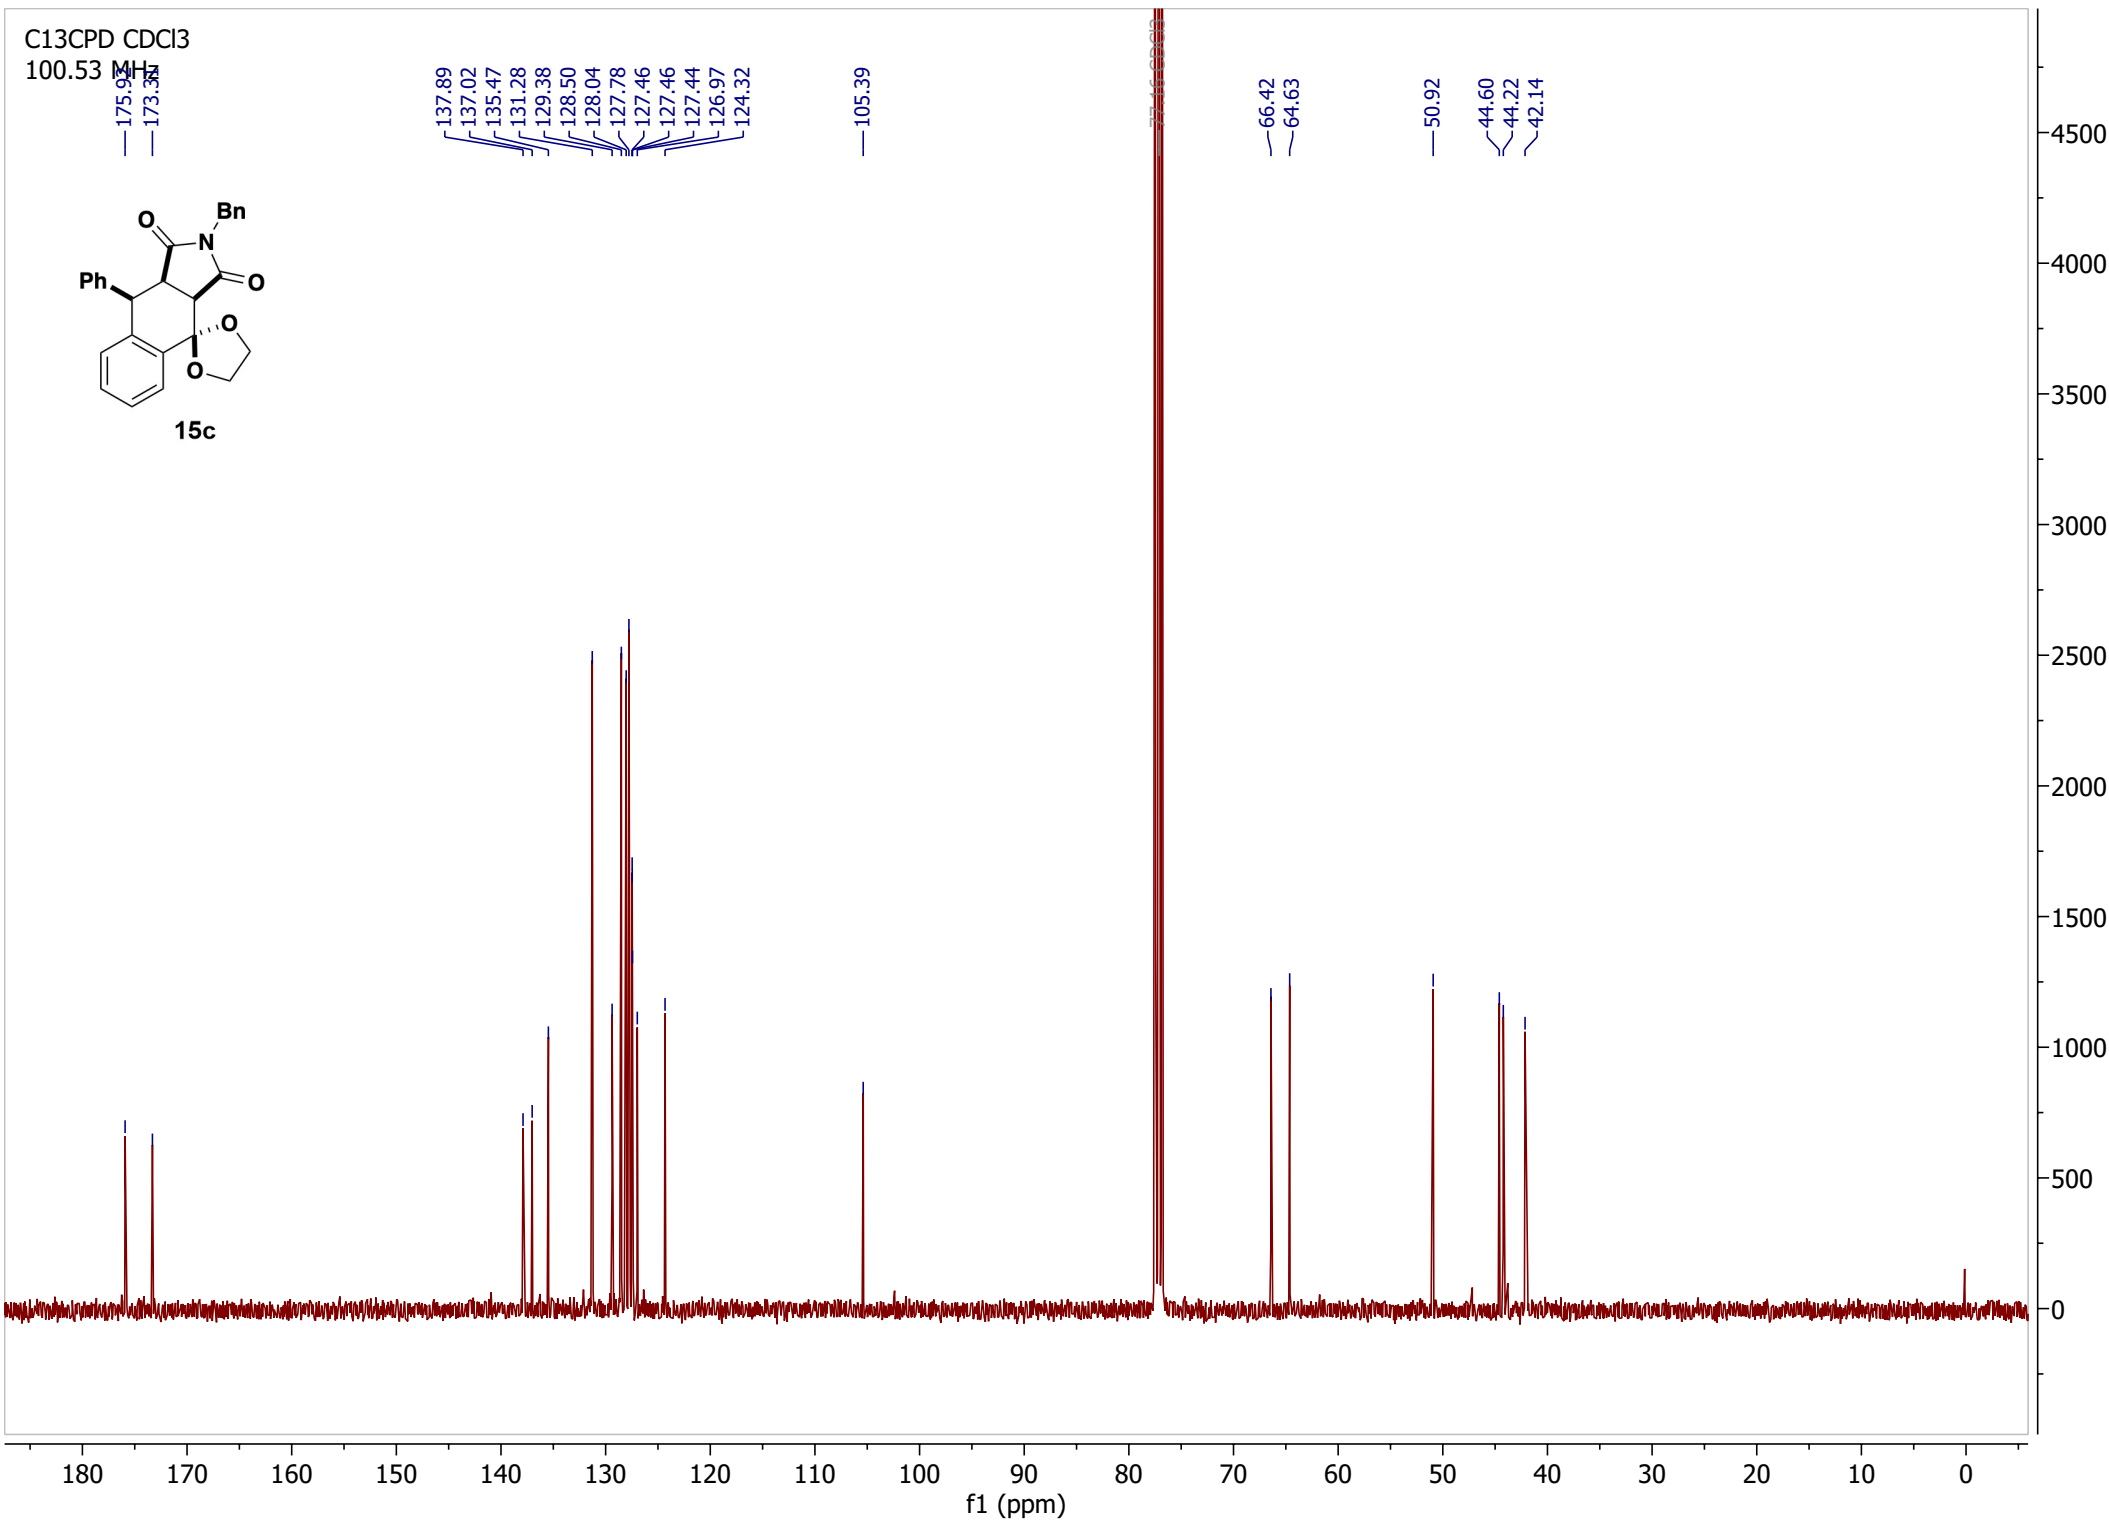

PROTON CDCl3

399.77 MHz

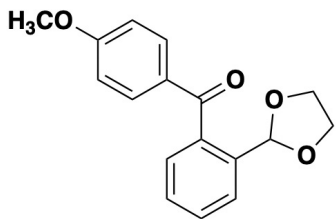

7.86  
7.77  
7.77  
7.70  
7.68  
7.68  
7.52  
7.52  
7.50  
7.50  
7.48  
7.48  
7.43  
7.43  
7.42  
7.41  
7.40  
7.39  
7.32  
7.31  
7.30  
7.29  
6.93  
6.91  
5.99

3.93  
3.93  
3.92  
3.92  
3.92  
3.91  
3.90  
3.90  
3.89  
3.89  
3.88  
3.88  
3.87

—0.00 TMS

H (td) 7.41  
F (dd) 7.69  
E (d) 7.79  
I (dd) 7.31  
J (d) 6.92  
G (td) 7.50

A (s) 5.99

C (m) 3.89  
B (m) 3.92  
D (s) 3.87

1.90  
1.00  
1.03  
1.07  
1.07

1.99

0.94

1.90  
1.91  
3.00

8.5 8.0 7.5 7.0 6.5 6.0 5.5 5.0 4.5 4.0 3.5 3.0 2.5 2.0 1.5 1.0 0.5 0.0 -0.5

f1 (ppm)

30000  
28000  
26000  
24000  
22000  
20000  
18000  
16000  
14000  
12000  
10000  
8000  
6000  
4000  
2000  
0  
-2000

C13CPD CDCl3  
100.53 MHz

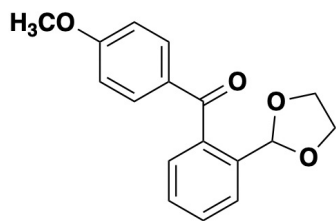

— 163.77

— 139.12

— 136.73

— 132.61

— 130.76

— 129.83

— 128.54

— 127.98

— 127.13

— 113.73

— 101.63

77.16 CDCl3

— 65.33

— 55.63

210 200 190 180 170 160 150 140 130 120 110 100 90 80 70 60 50 40 30 20 10 0 -10  
f1 (ppm)

9000  
8000  
7000  
6000  
5000  
4000  
3000  
2000  
1000  
0

PROTON CDCl3  
399.77 MHz

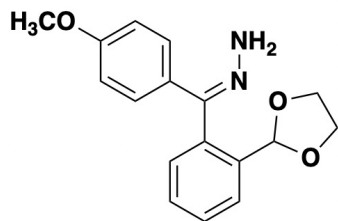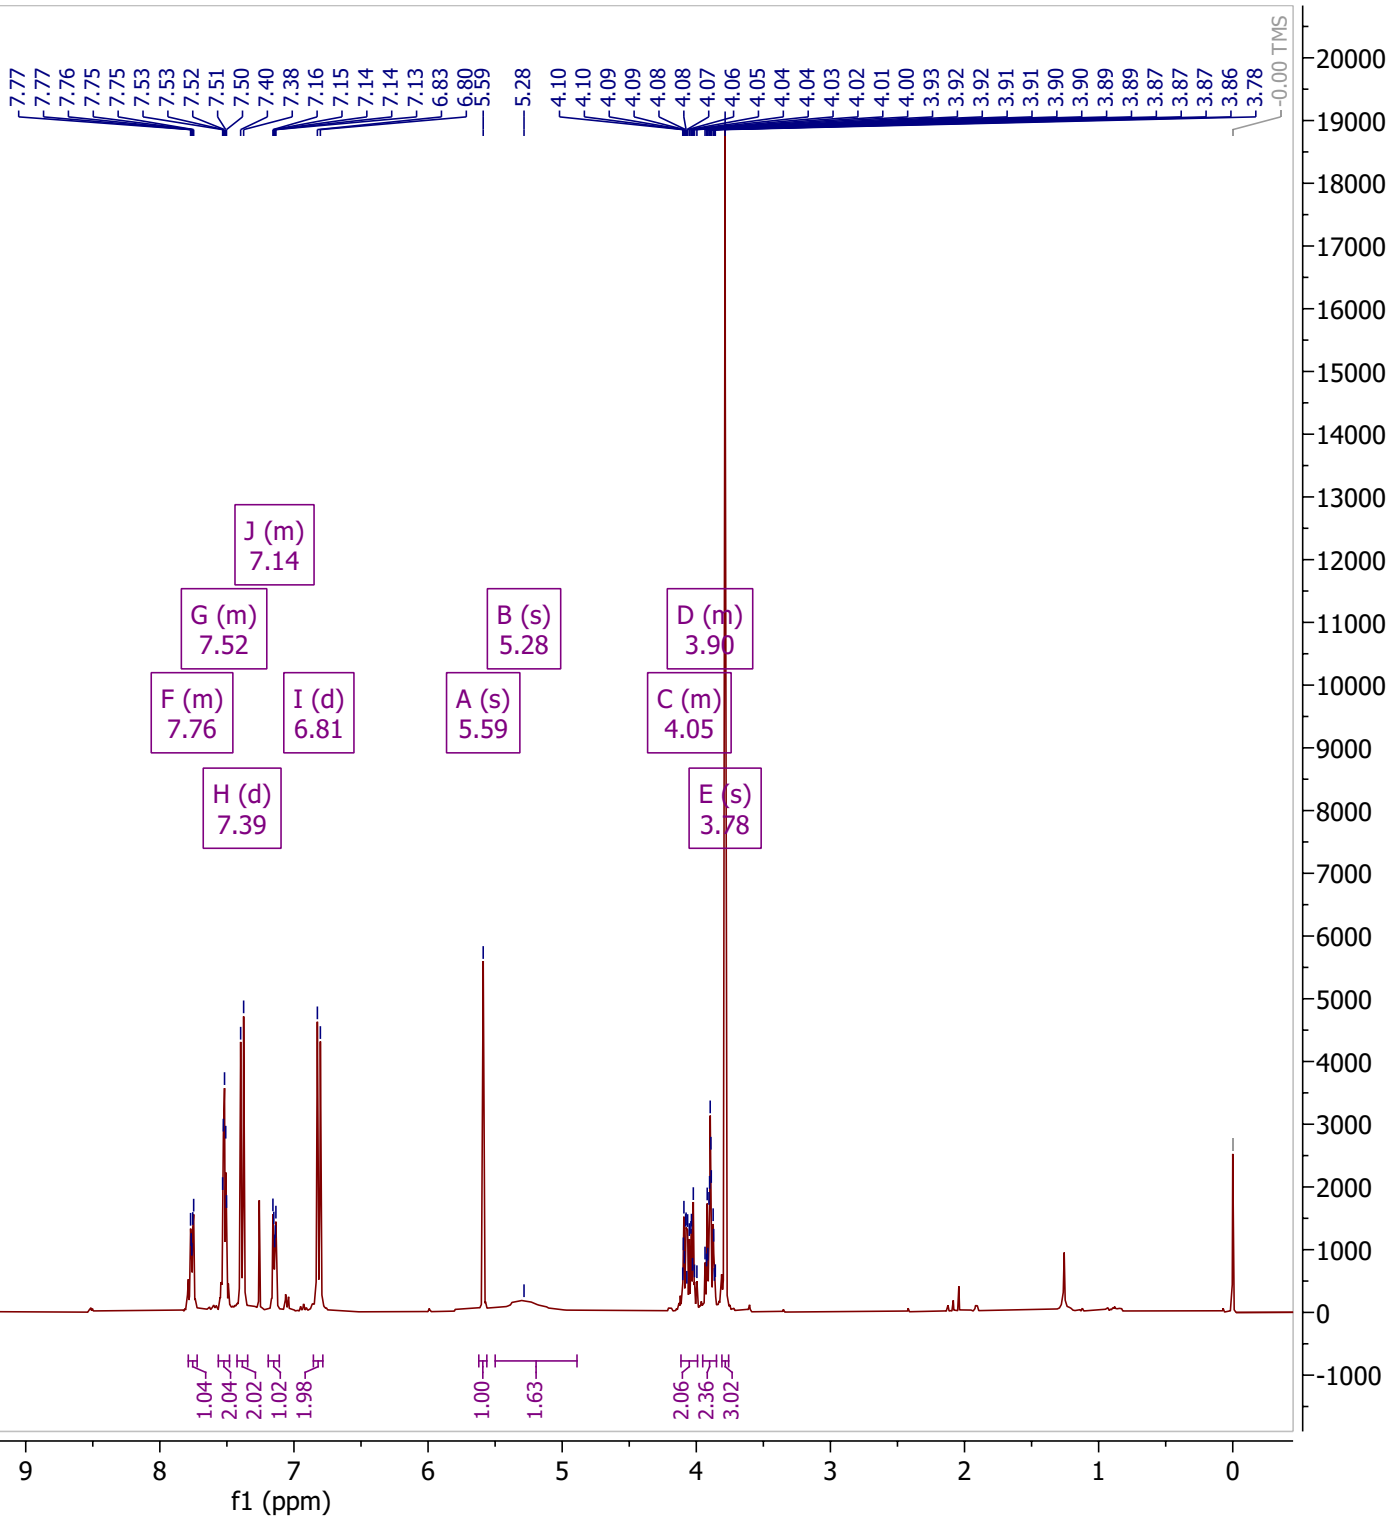

C13CPD CDCl3  
100.53 MHz

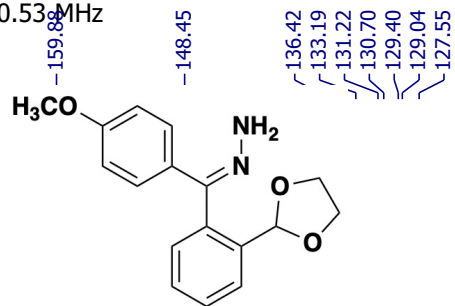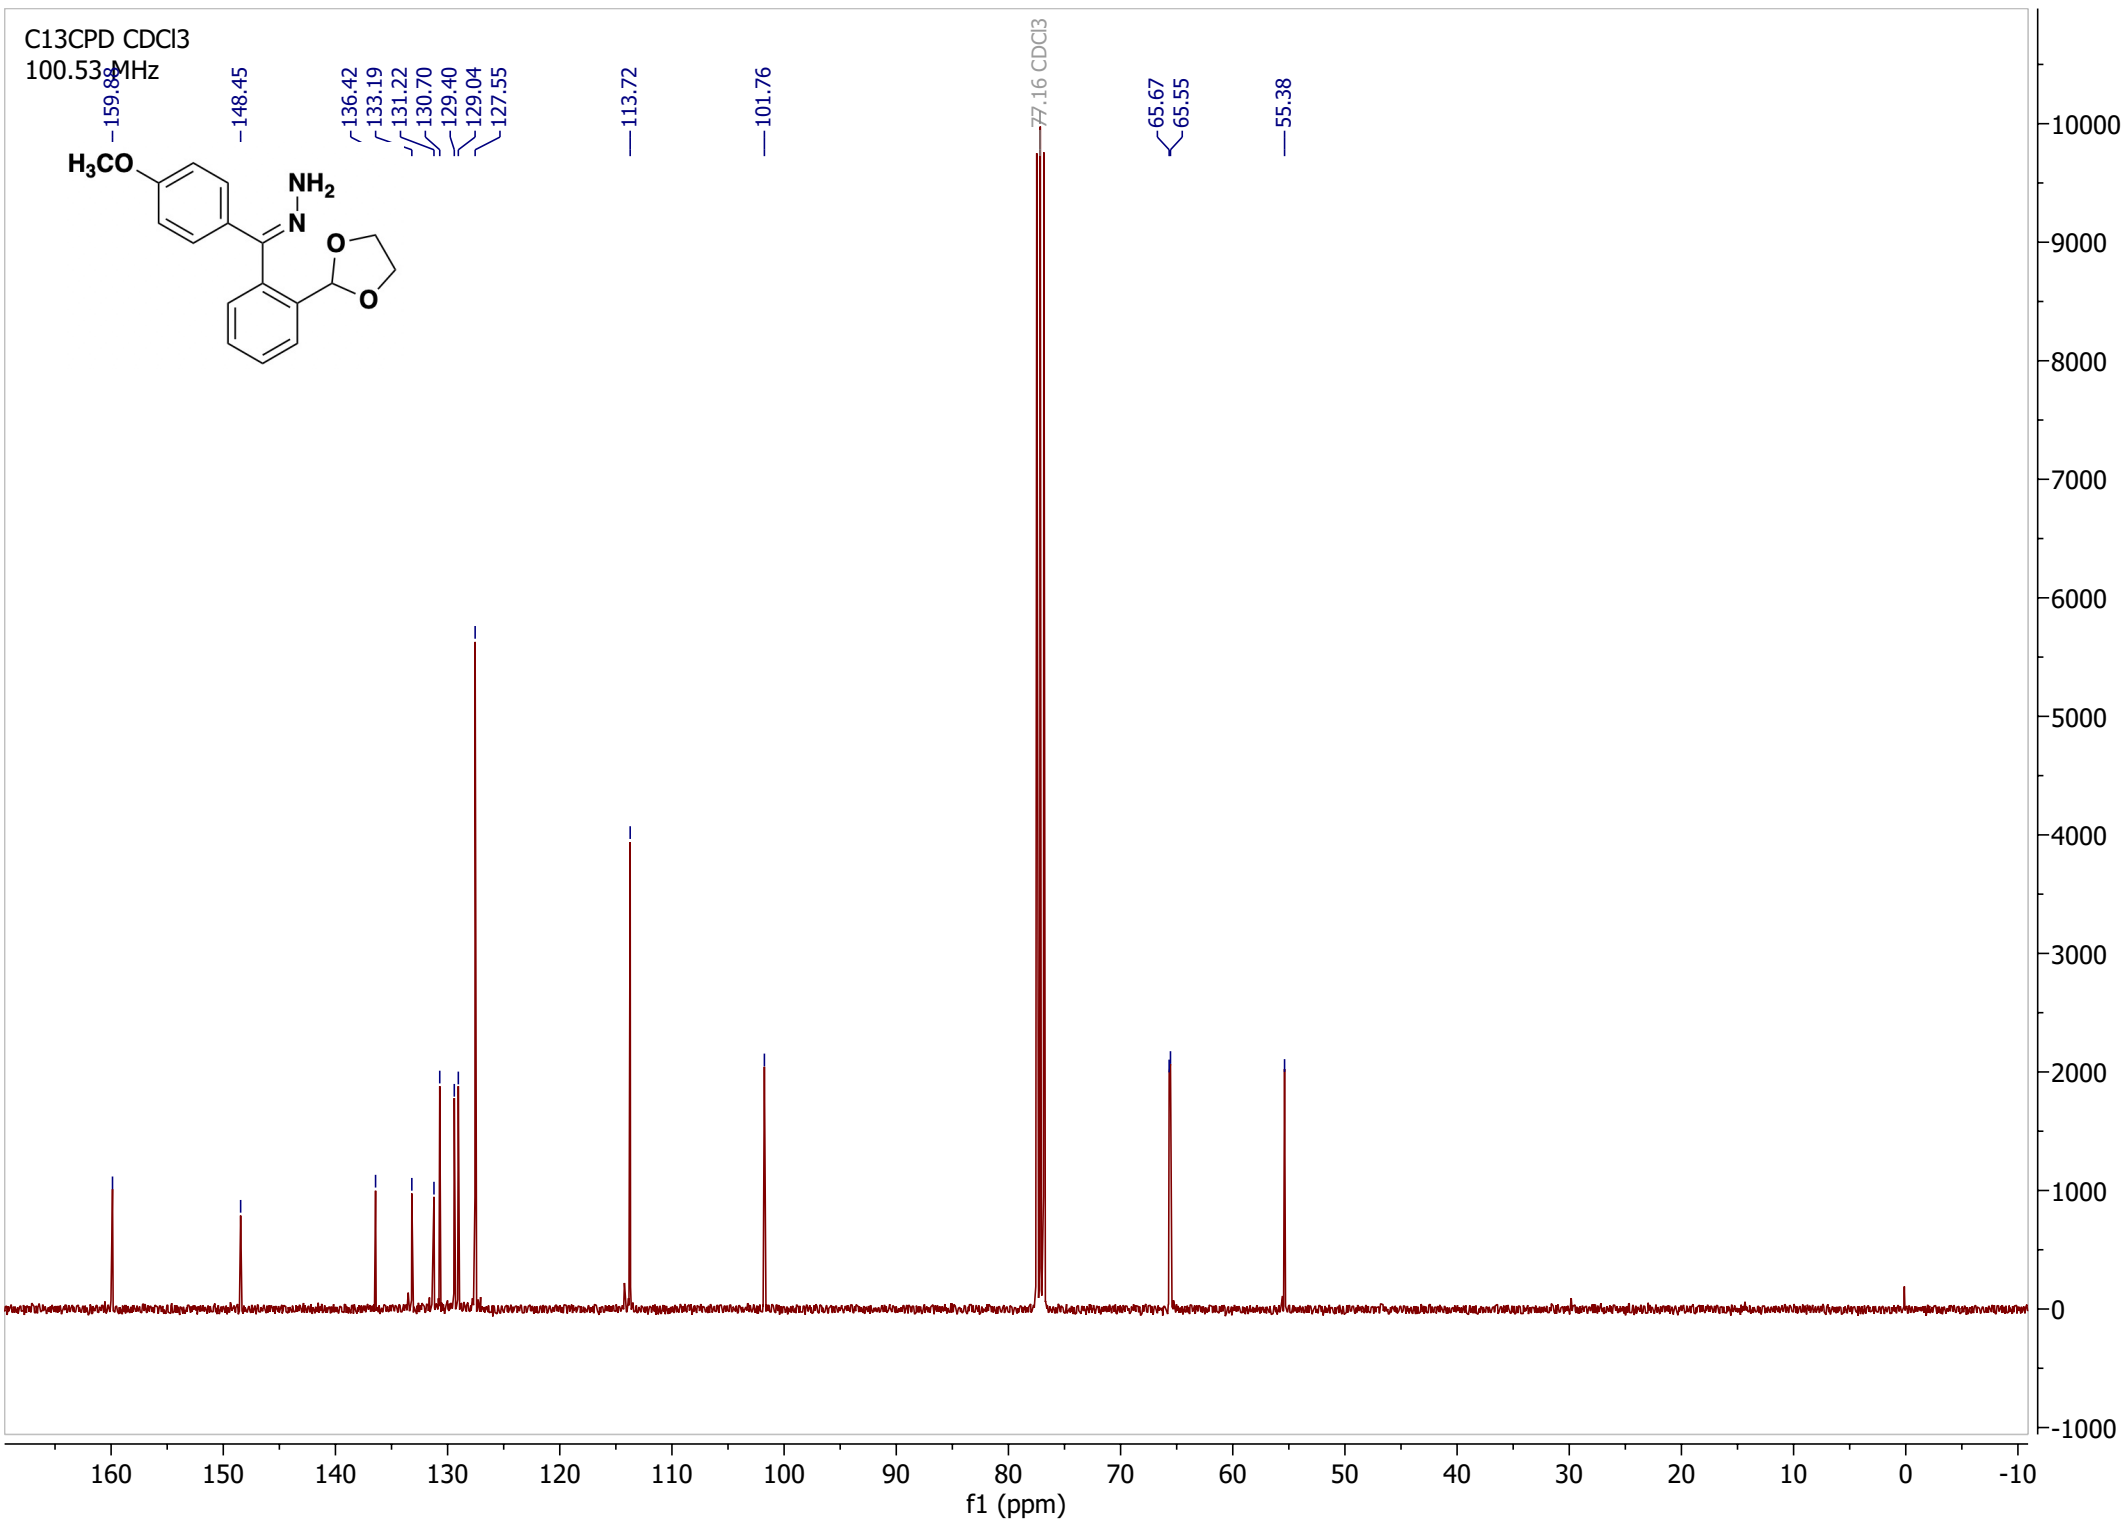

PROTON CDCl3

300.77 MHz

7.65, 7.64, 7.48, 7.47, 7.35, 7.33, 7.31, 7.30, 7.29, 7.28, 7.19, 7.17, 6.89, 6.87, 6.86

4.98, 4.97, 4.39, 4.37, 4.36, 4.34, 4.31, 4.29, 4.28, 4.26, 4.24, 4.22, 4.21, 4.19, 4.15, 4.13, 4.12, 4.10, 3.84, 3.82, 3.80, 3.75, 3.73

-0.00 TMS

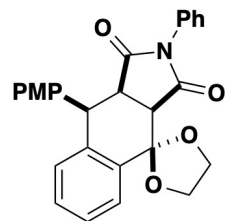

15d

L (m) 7.65  
I (m) 7.18  
J (m) 7.31  
H (m) 6.88  
K (d) 7.48

A (d) 4.97  
B (q) 4.37  
D (q) 4.22

E (m) 4.12

C (q) 4.29

F (m) 3.80

G (d) 3.74

0.99  
2.01  
4.98  
1.02

1.00

1.00  
1.00  
1.04  
1.00

3.99  
1.07

8.5 8.0 7.5 7.0 6.5 6.0 5.5 5.0 4.5 4.0 3.5 3.0 2.5 2.0 1.5 1.0 0.5 0.0 -0.5

f1 (ppm)

20000  
19000  
18000  
17000  
16000  
15000  
14000  
13000  
12000  
11000  
10000  
9000  
8000  
7000  
6000  
5000  
4000  
3000  
2000  
1000  
0  
-1000

C13CPD CDCl3  
100.53 MHz

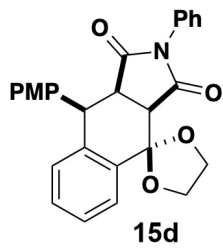

158.88

175.54  
172.82

138.61

135.67

132.20

131.82

129.78

129.59

129.09

128.62

127.97

127.16

126.54

124.60

113.53

105.11

66.37

65.09

55.35

51.26

45.24

43.81

180

170

160

150

140

130

120

110

100

90

80

70

60

50

40

30

20

10

0

f1 (ppm)

14000

13000

12000

11000

10000

9000

8000

7000

6000

5000

4000

3000

2000

1000

0

-1000



PROTON CDCl3  
399.77 MHz

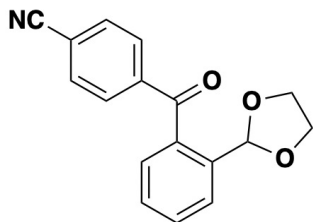

7.887  
7.877  
7.75  
7.73  
7.71  
7.69  
7.58  
7.57  
7.56  
7.55  
7.54  
7.54  
7.48  
7.47  
7.46  
7.45  
7.44  
7.44  
7.44  
7.30  
7.29  
7.28  
7.27  
6.00

3.90  
3.88  
3.87  
3.87  
3.87  
3.86  
3.85  
3.85  
3.84  
3.84  
3.83  
3.81

— 0.00 TMS

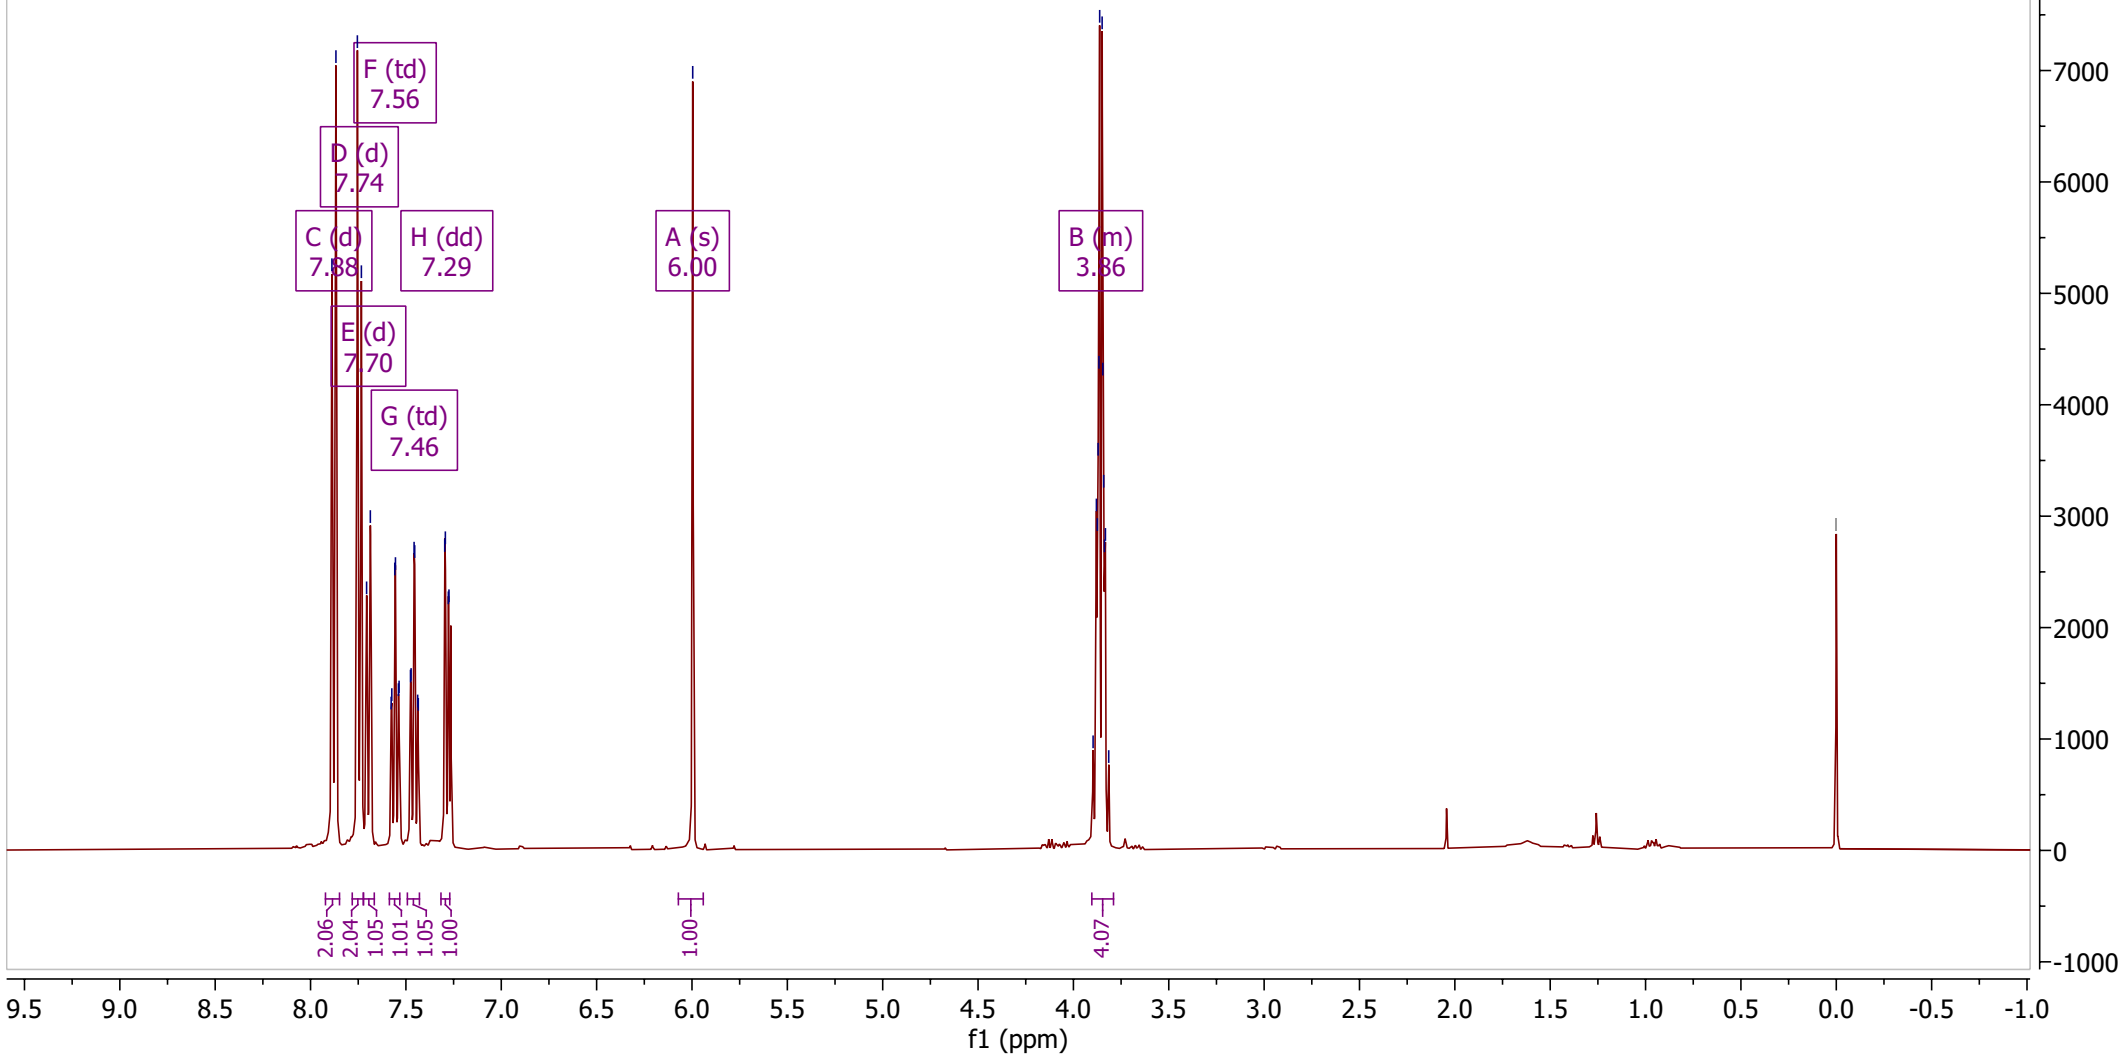

C13CPD CDCl3  
100.53 MHz

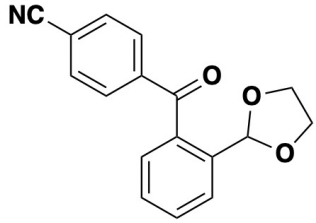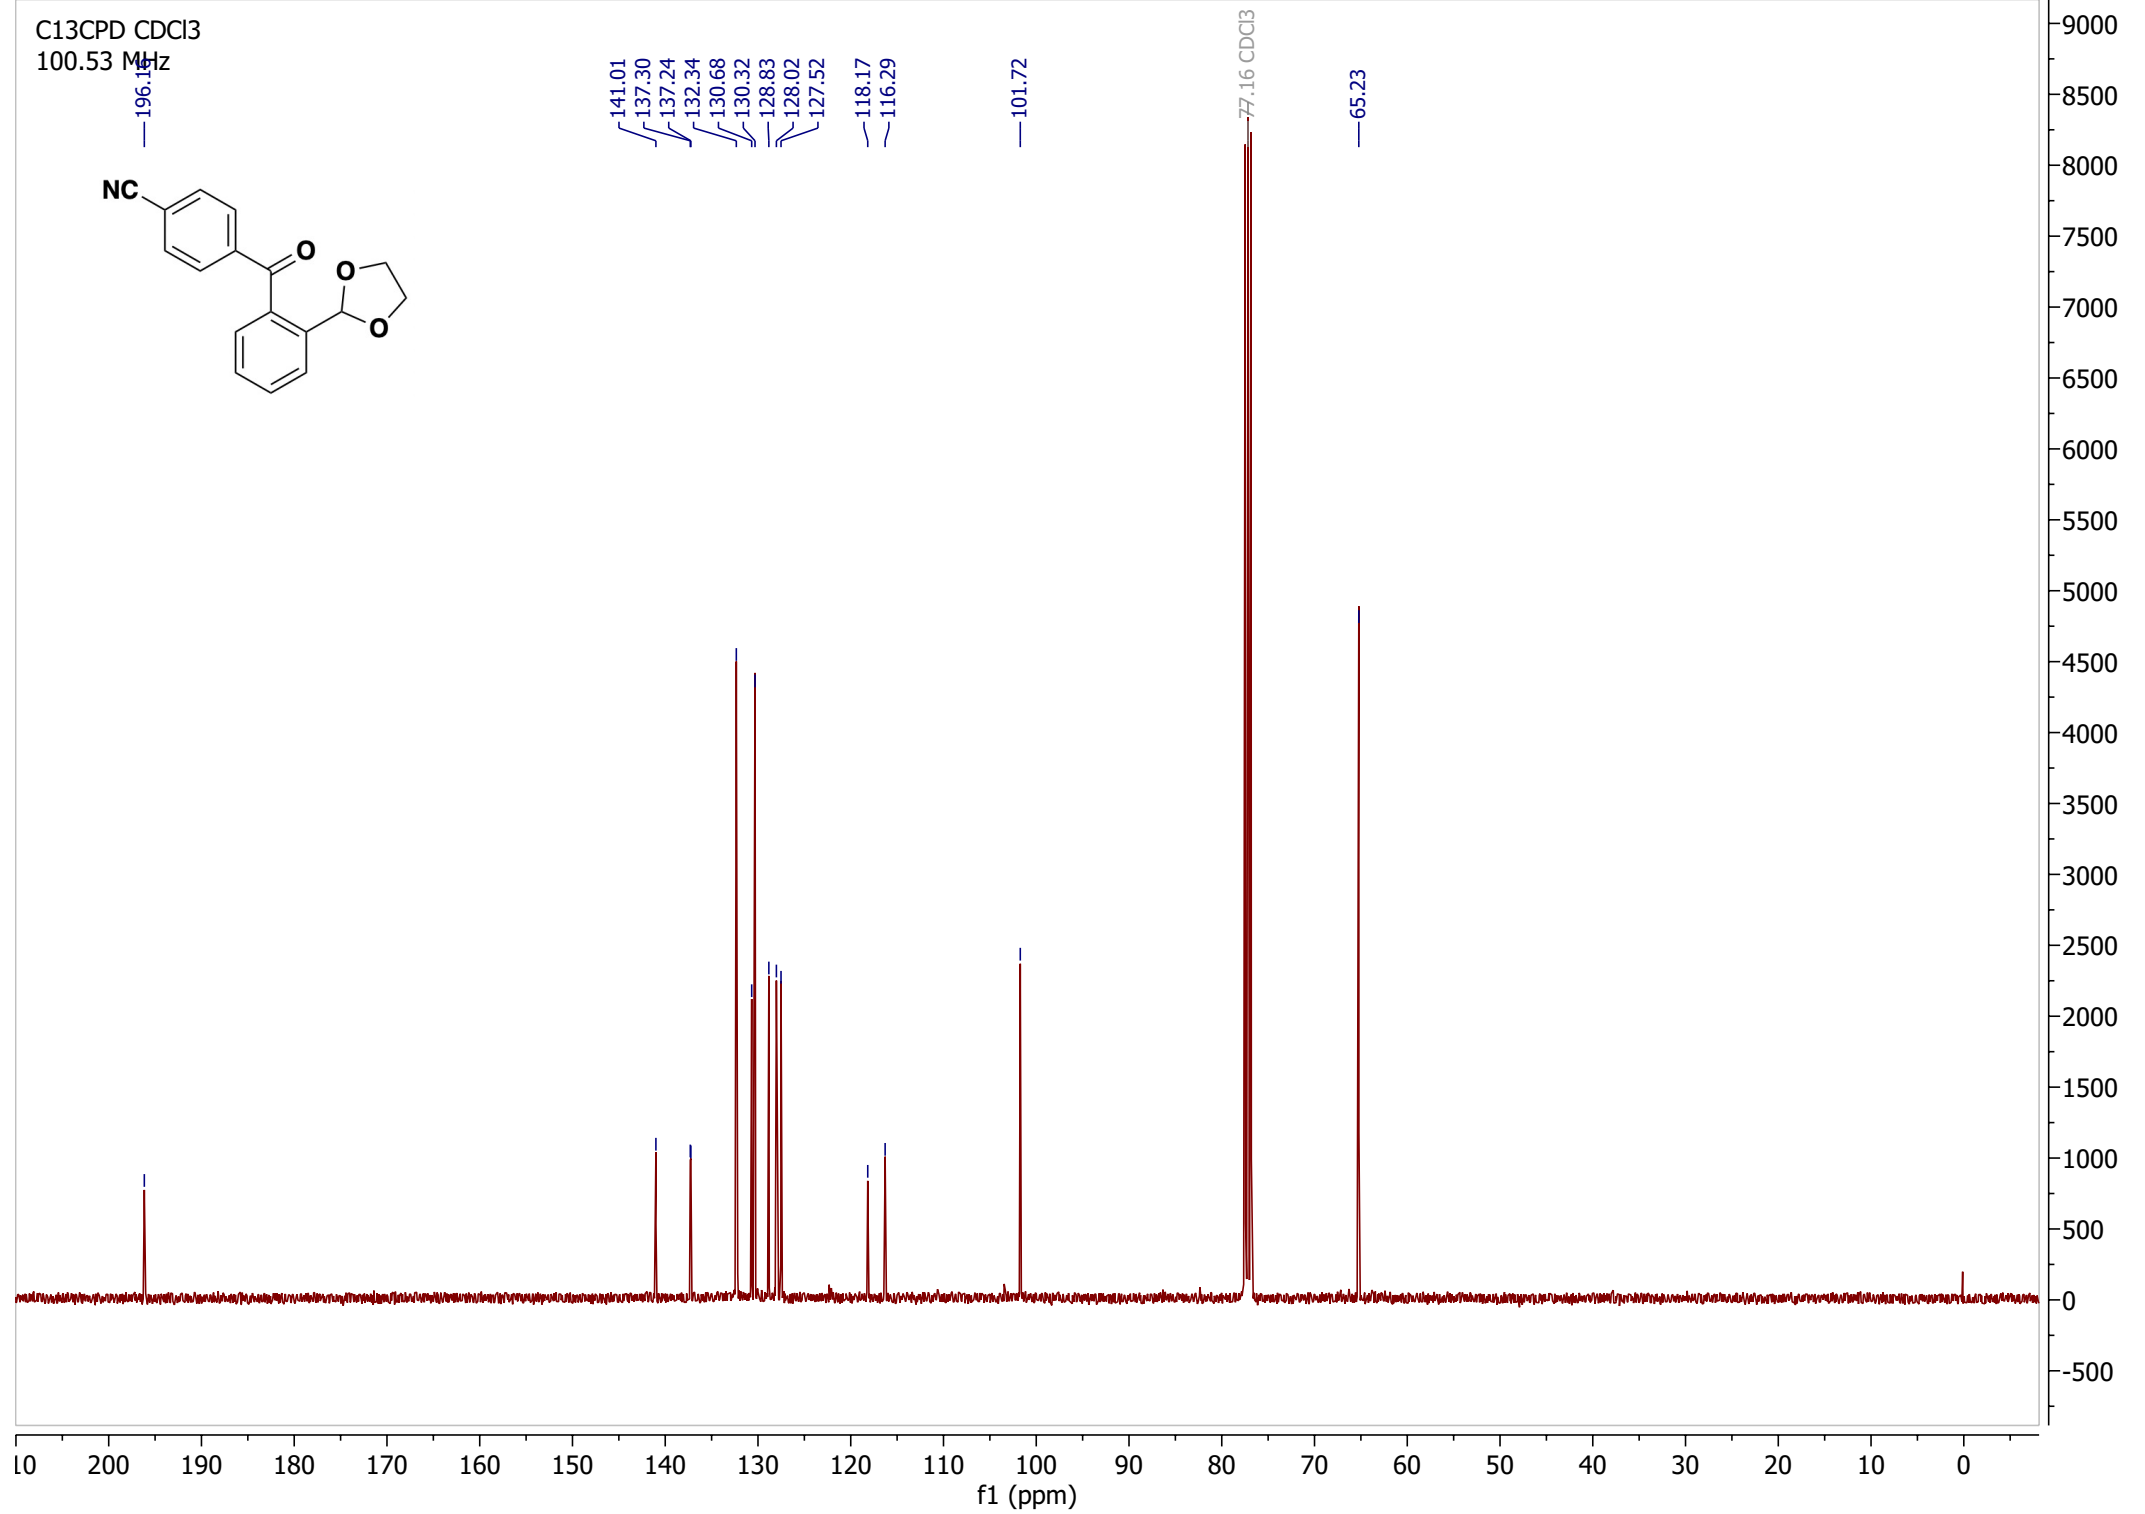

PROTON CDCl3

300 MHz

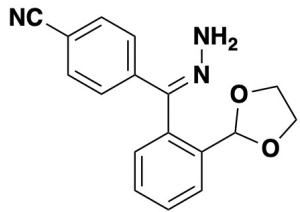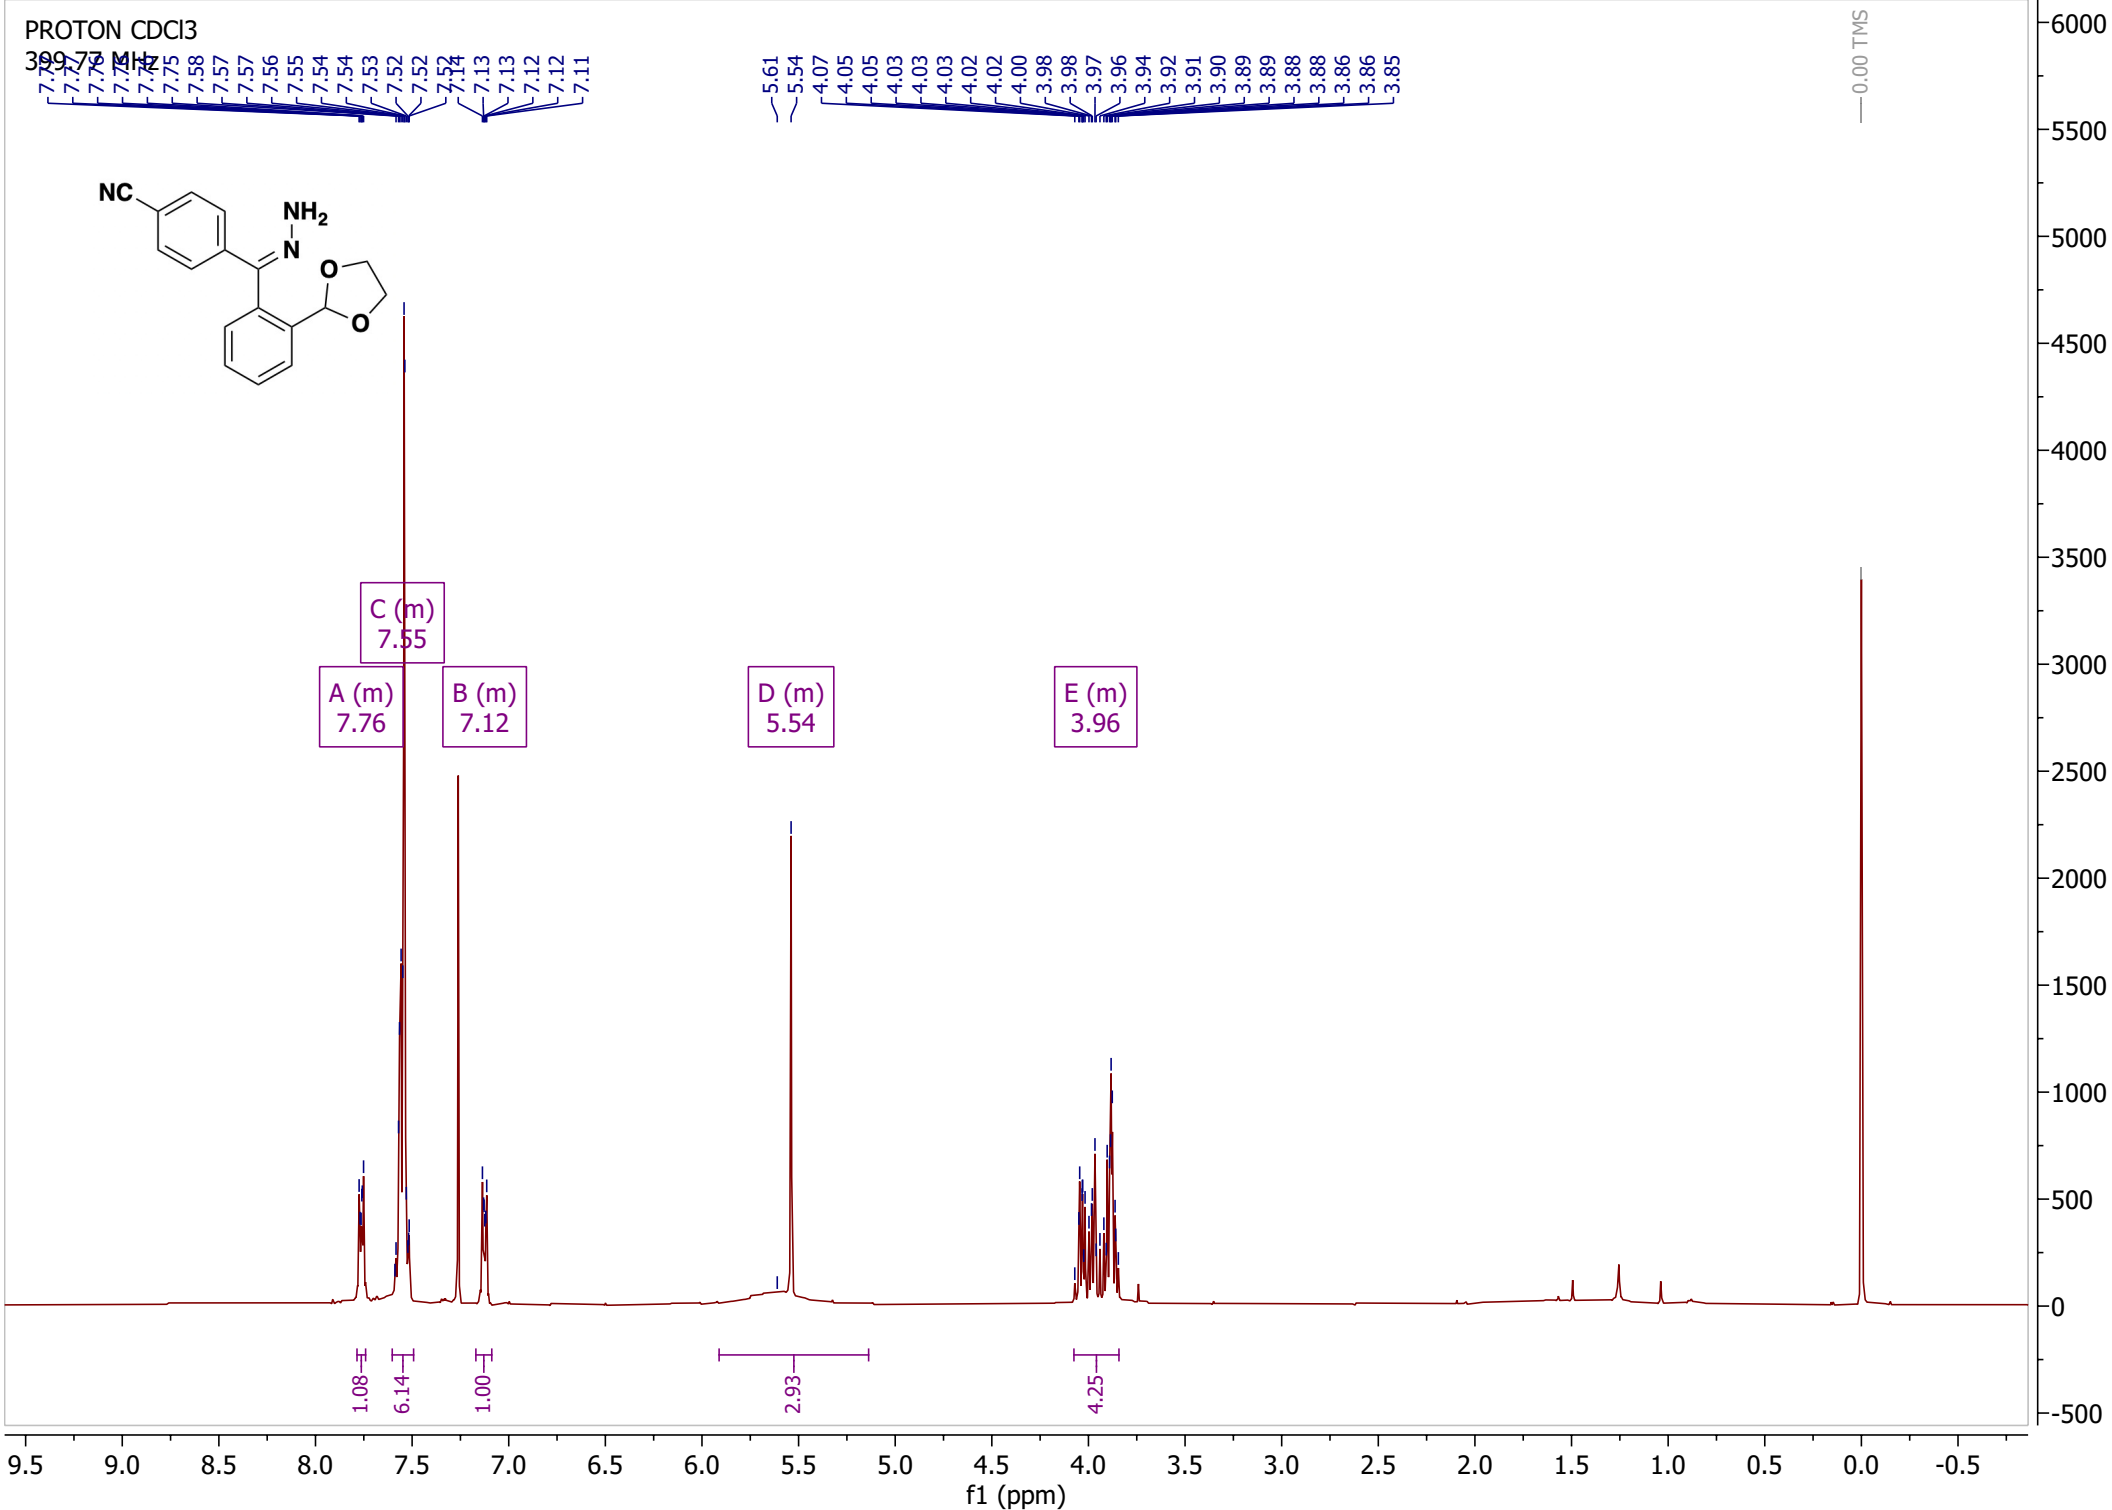

C13CPD CDCl3  
100.53 MHz



145.63  
142.73  
136.84  
132.10  
131.57  
131.05  
129.95  
129.27  
128.11  
126.39  
119.29

111.06

101.96

65.62  
65.59

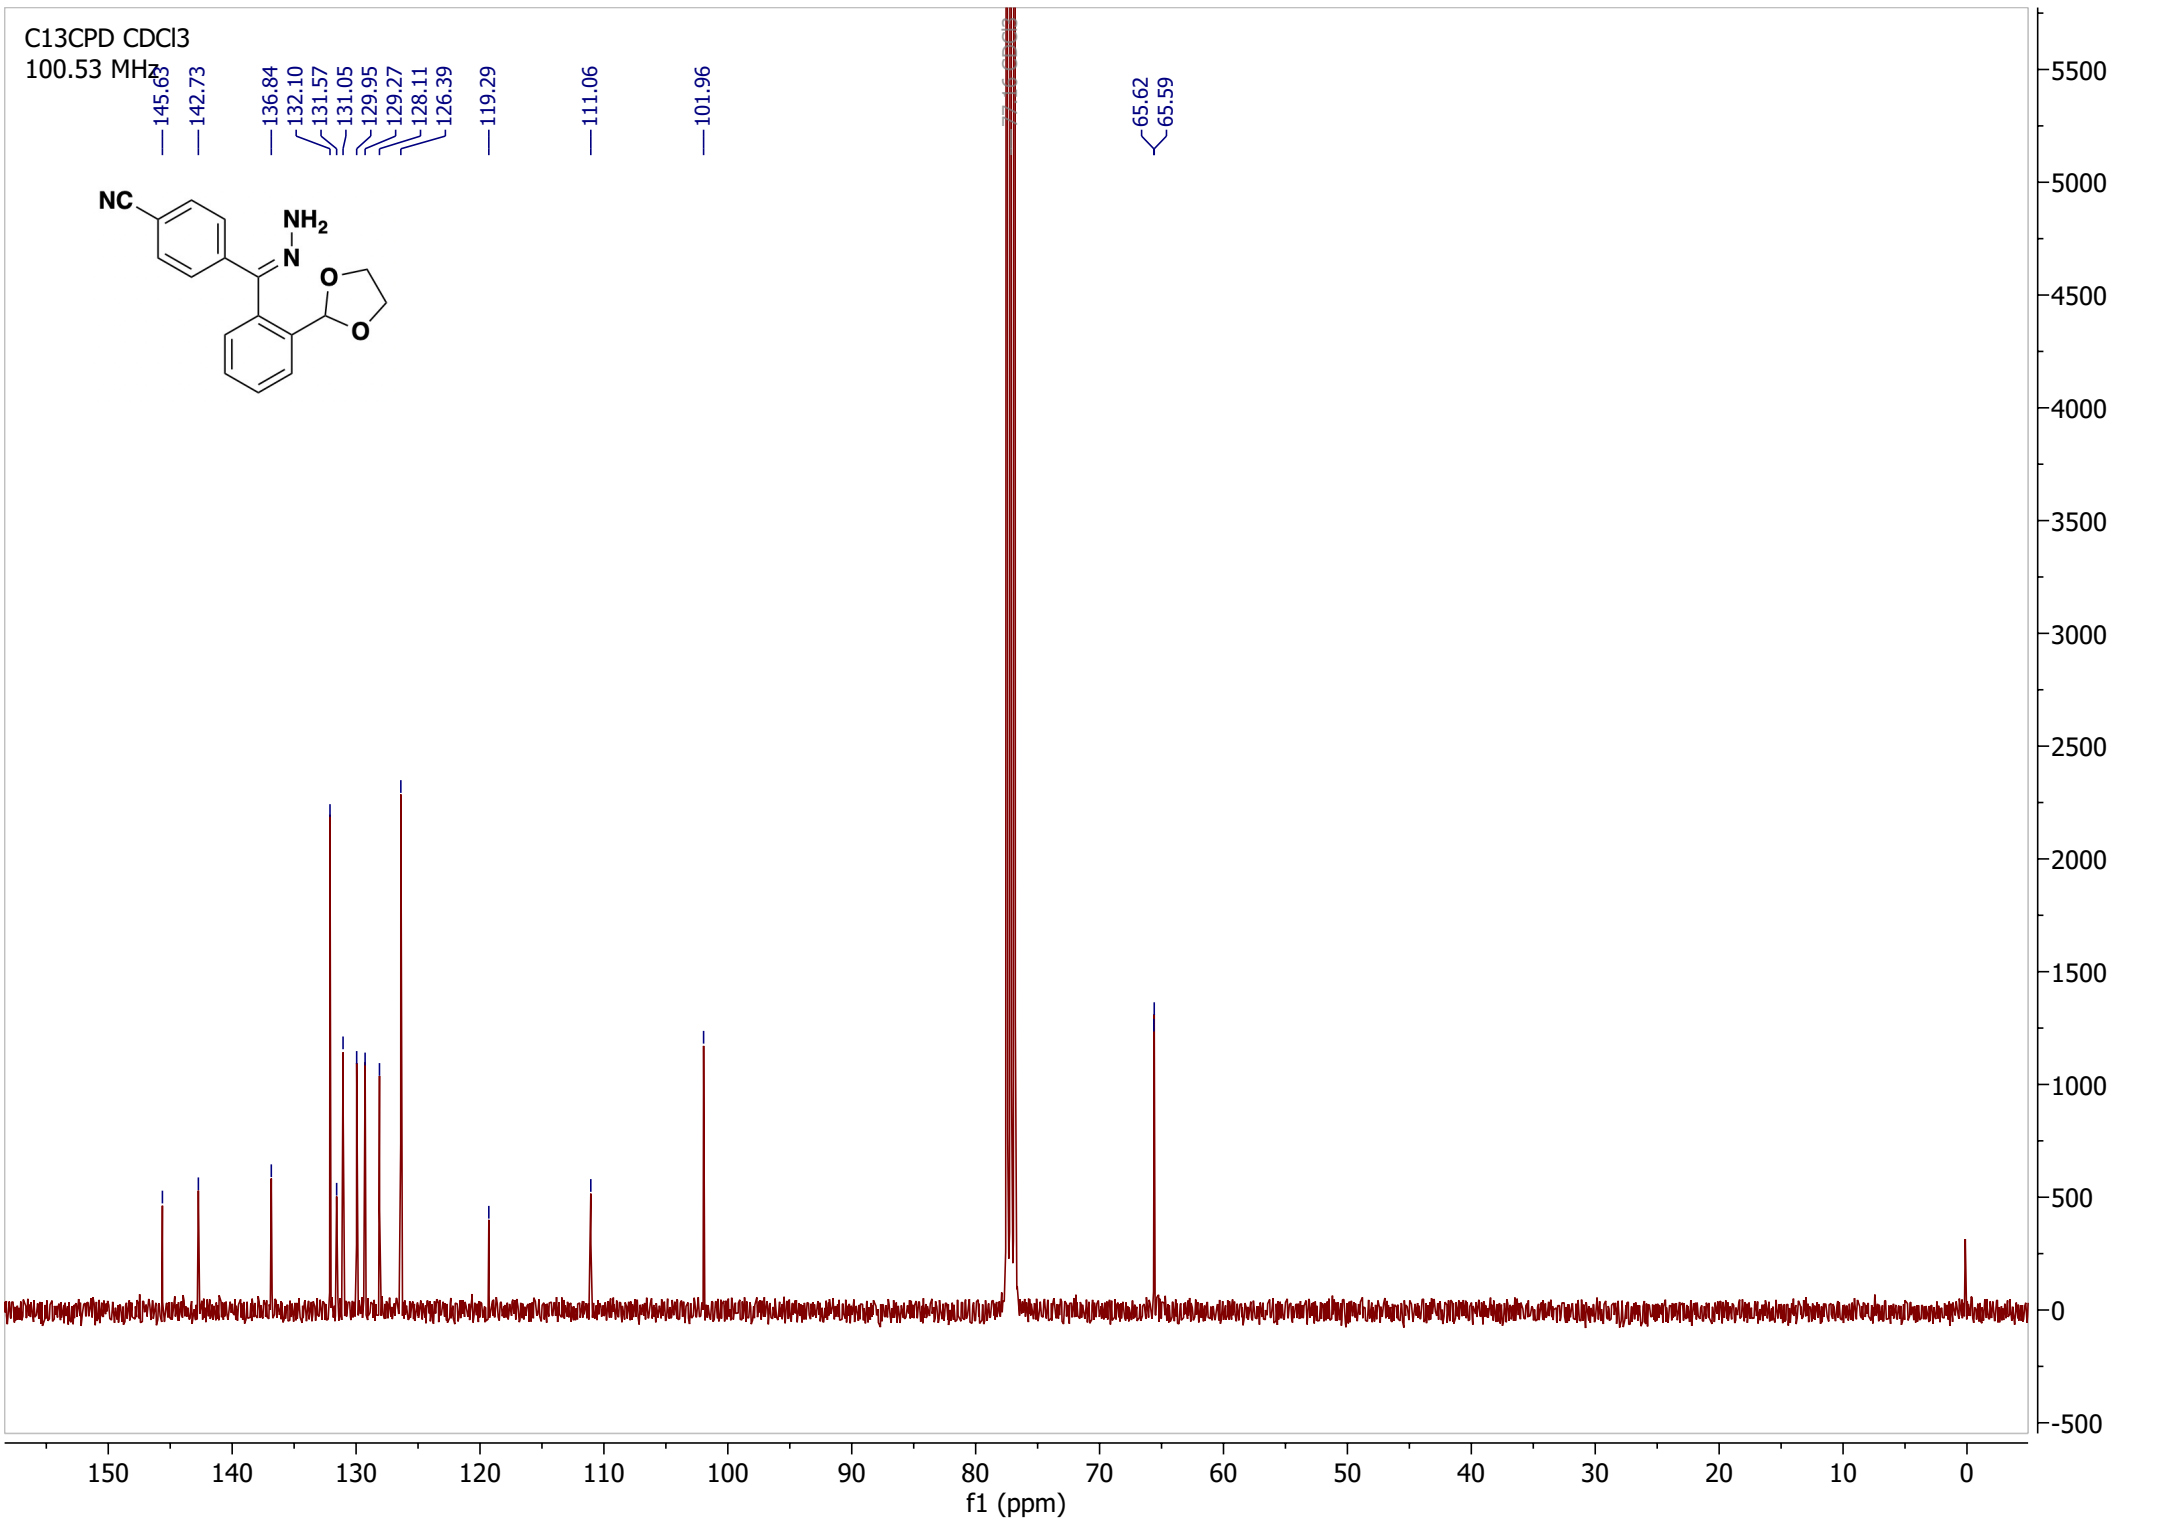

PROTON CDCl3

399.77 MHz

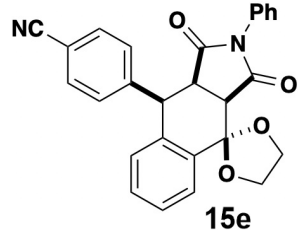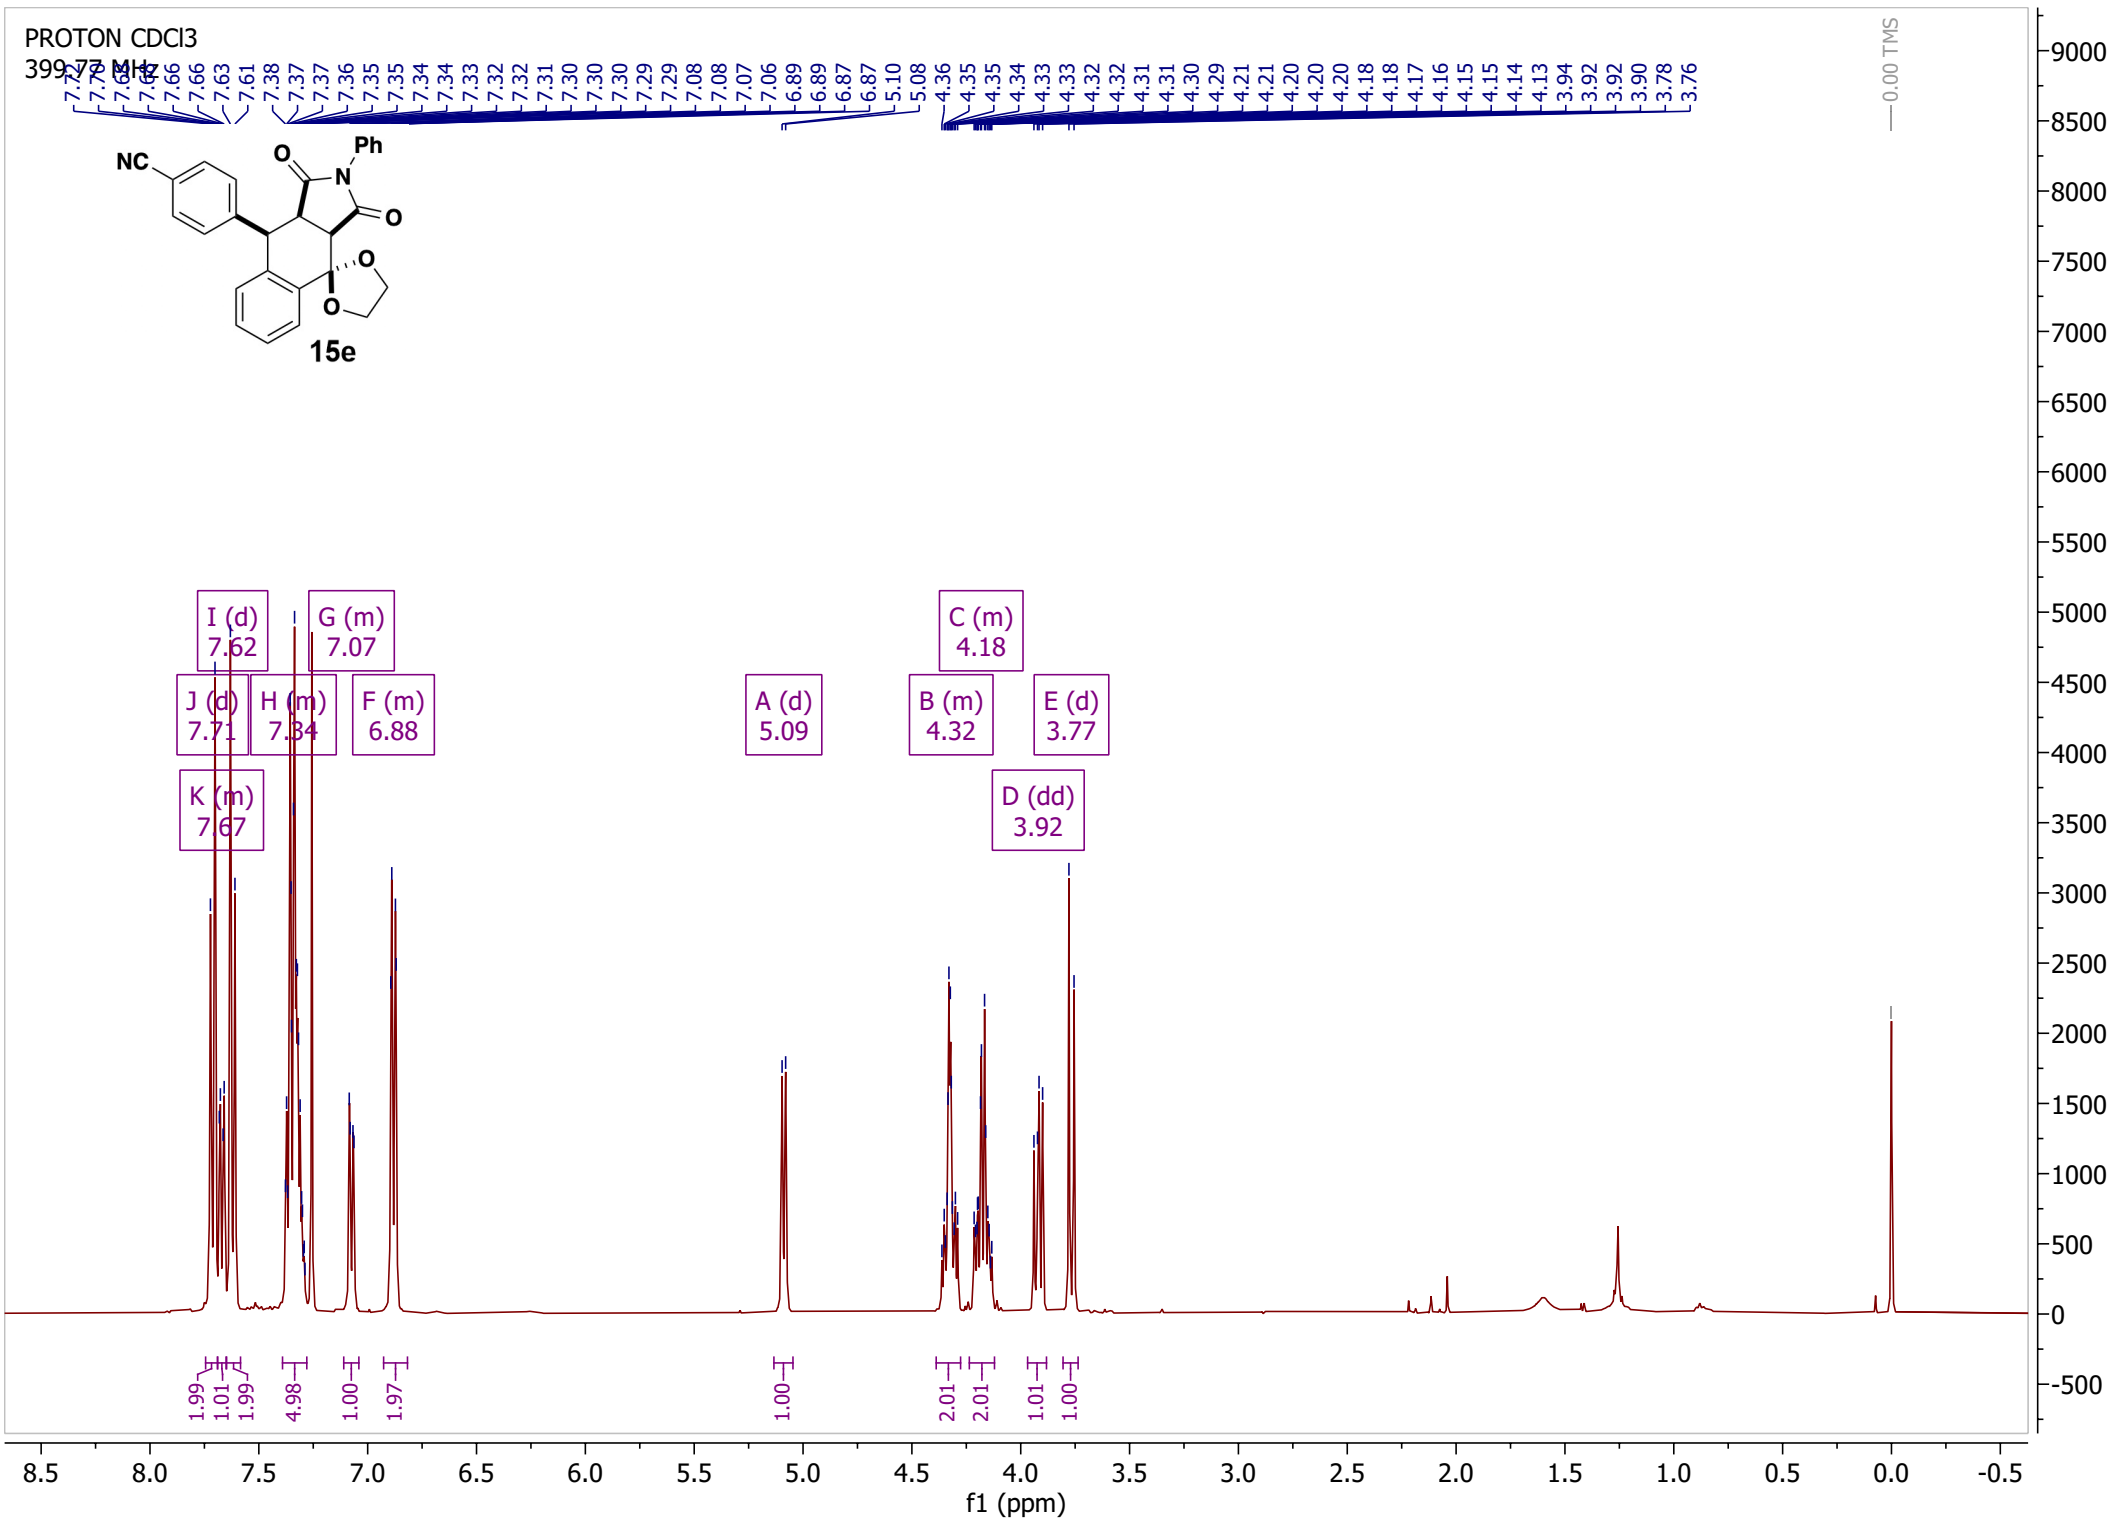

C13CPD CDCl3  
100.53 MHz

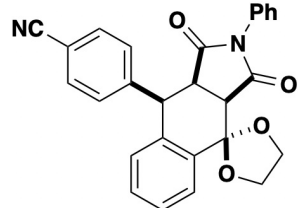

15e

143.79  
137.11  
135.80  
131.84  
131.81  
131.56  
129.85  
129.21  
128.86  
127.84  
127.73  
126.38  
124.82  
118.96

111.23

105.17

77.16 CDCl3

66.27  
65.42

51.00

44.29  
44.23

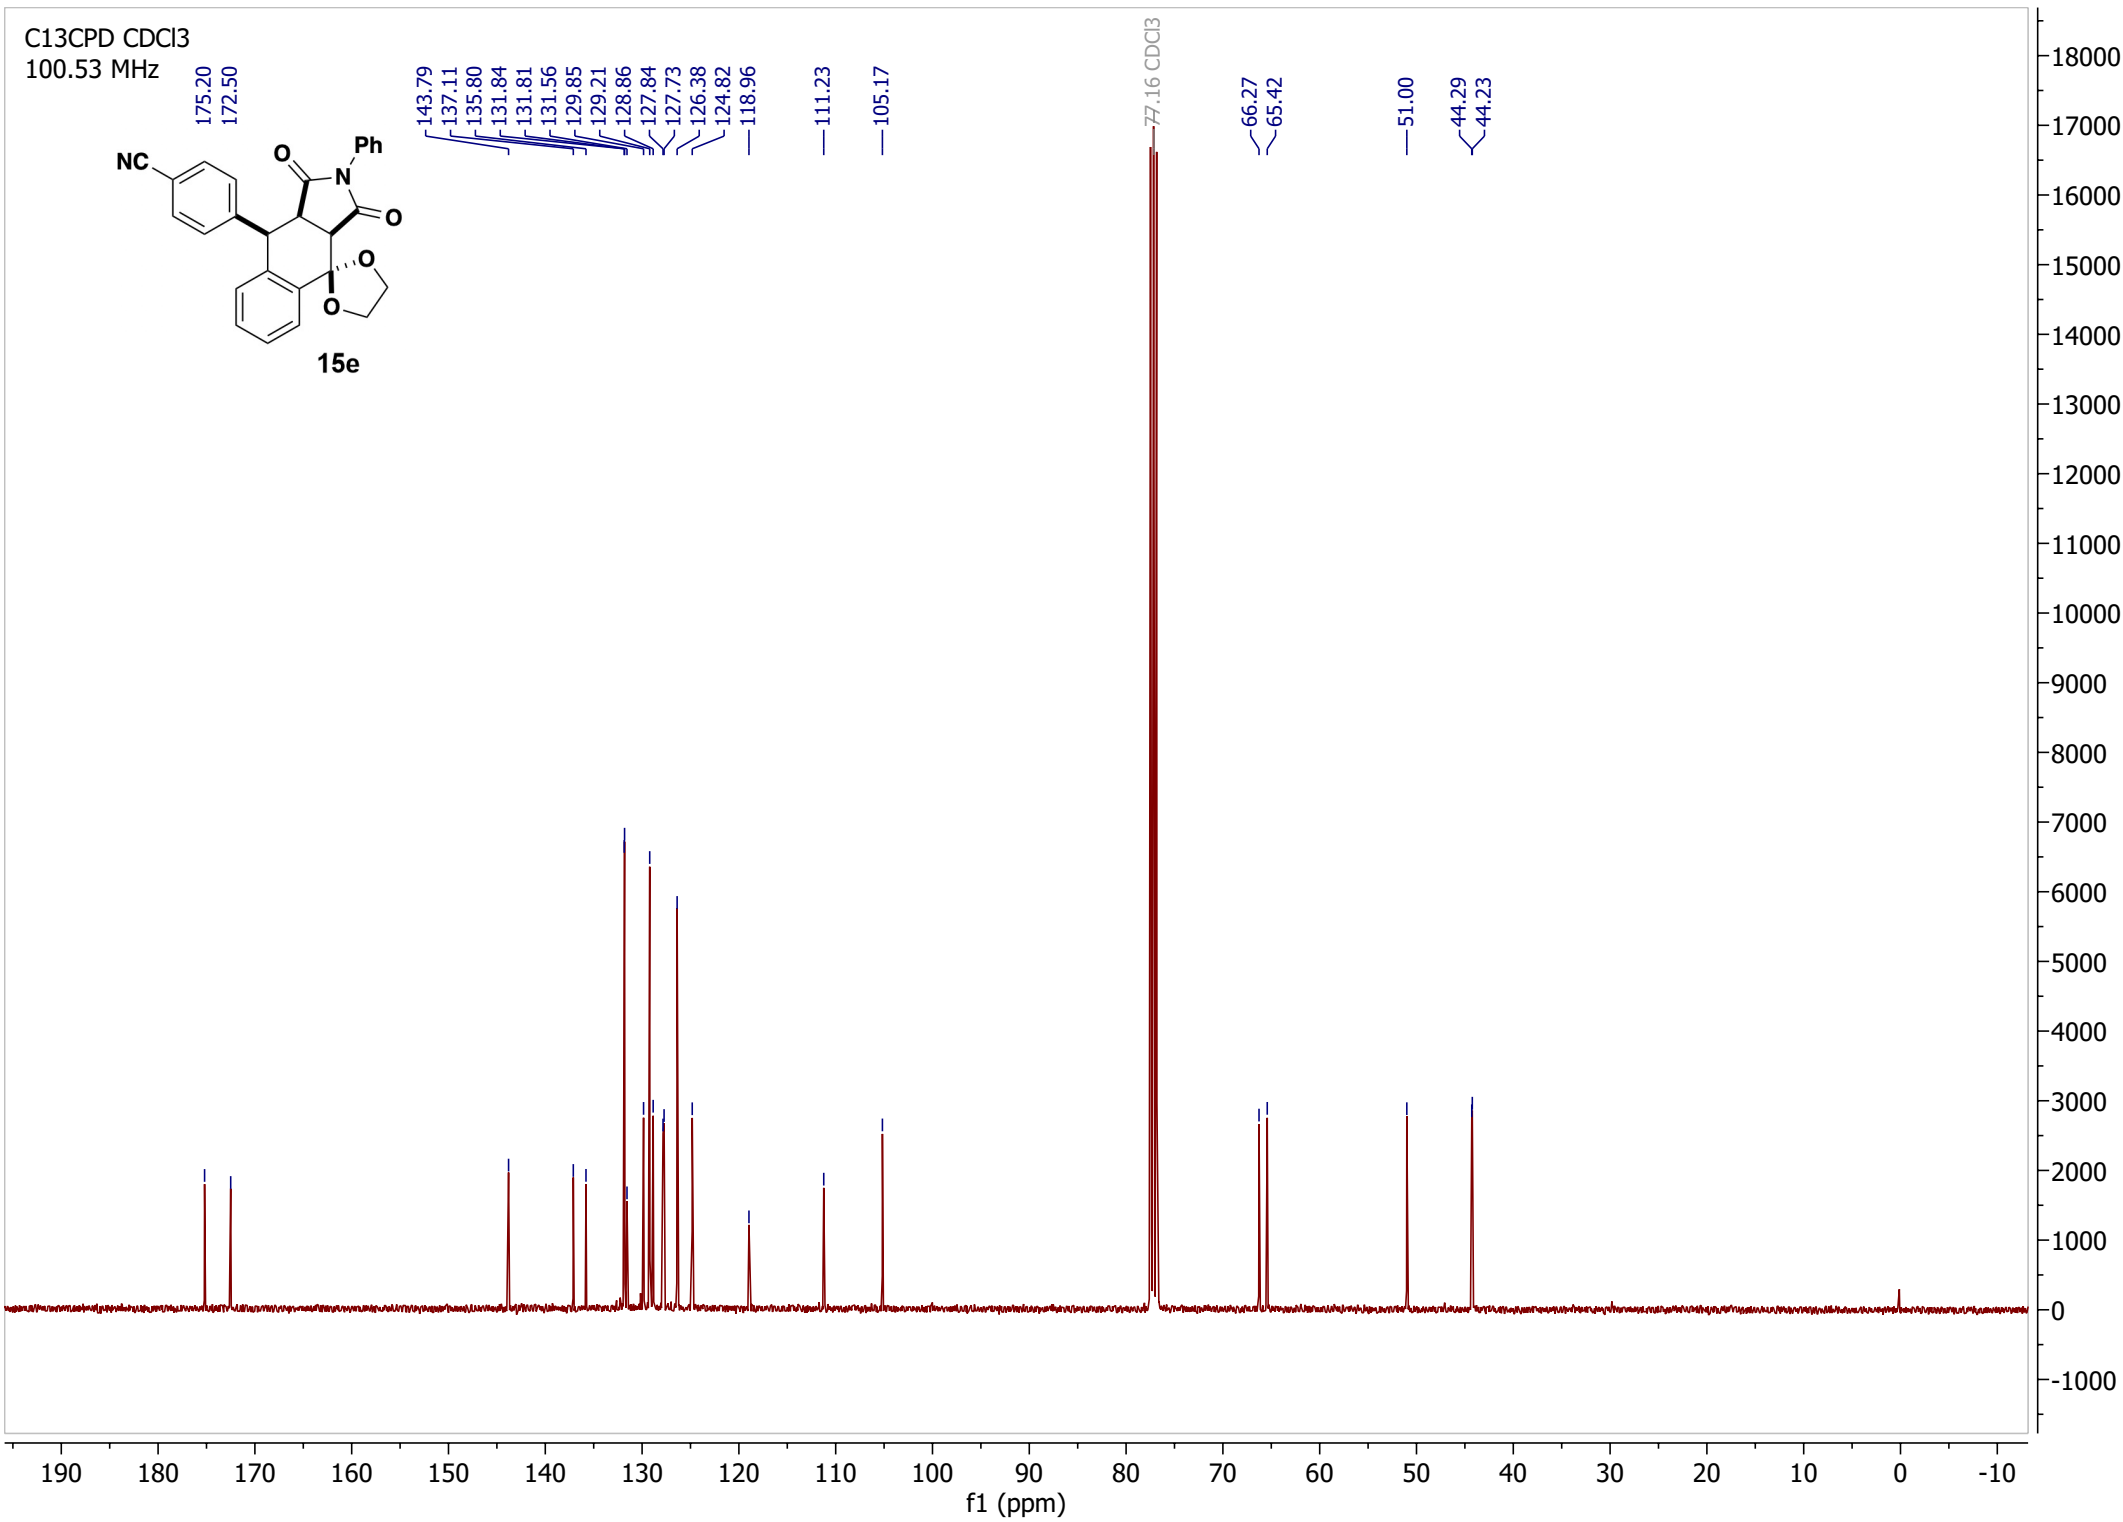

PROTON CDCl3  
399.77 MHz

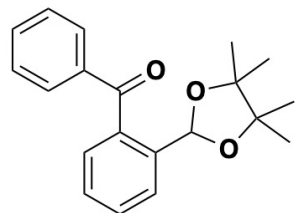

7.80  
7.78  
7.58  
7.56  
7.54  
7.52  
7.50  
7.48  
7.45  
7.43  
7.41  
7.39  
7.37  
7.35  
7.31  
7.29  
6.11

1.15  
1.11

0.00 TMS

G (t)  
7.43

E (t)  
7.56

D (d)  
7.79

I (d)  
7.30

F (t)  
7.50

H (t)  
7.37

A (s)  
6.11

C (s)  
1.11

B (s)  
1.15

2.99  
1.05  
1.07  
1.07  
2.04  
1.07  
1.06

1.00

5.95  
6.00

0.5 10.0 9.5 9.0 8.5 8.0 7.5 7.0 6.5 6.0 5.5 5.0 4.5 4.0 3.5 3.0 2.5 2.0 1.5 1.0 0.5 0.0 -0.5 -1.0  
f1 (ppm)

3400  
3200  
3000  
2800  
2600  
2400  
2200  
2000  
1800  
1600  
1400  
1200  
1000  
800  
600  
400  
200  
0  
-200

C13CPD CDCl3  
100.53 MHz

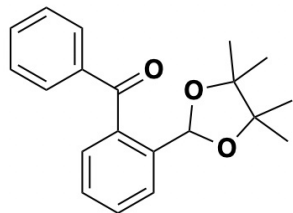

198.16

139.57  
138.44  
138.22  
132.96  
130.26  
130.14  
128.30  
128.20  
127.74  
126.45

97.13

82.83

77.16  
77.00  
76.84

24.10

22.29

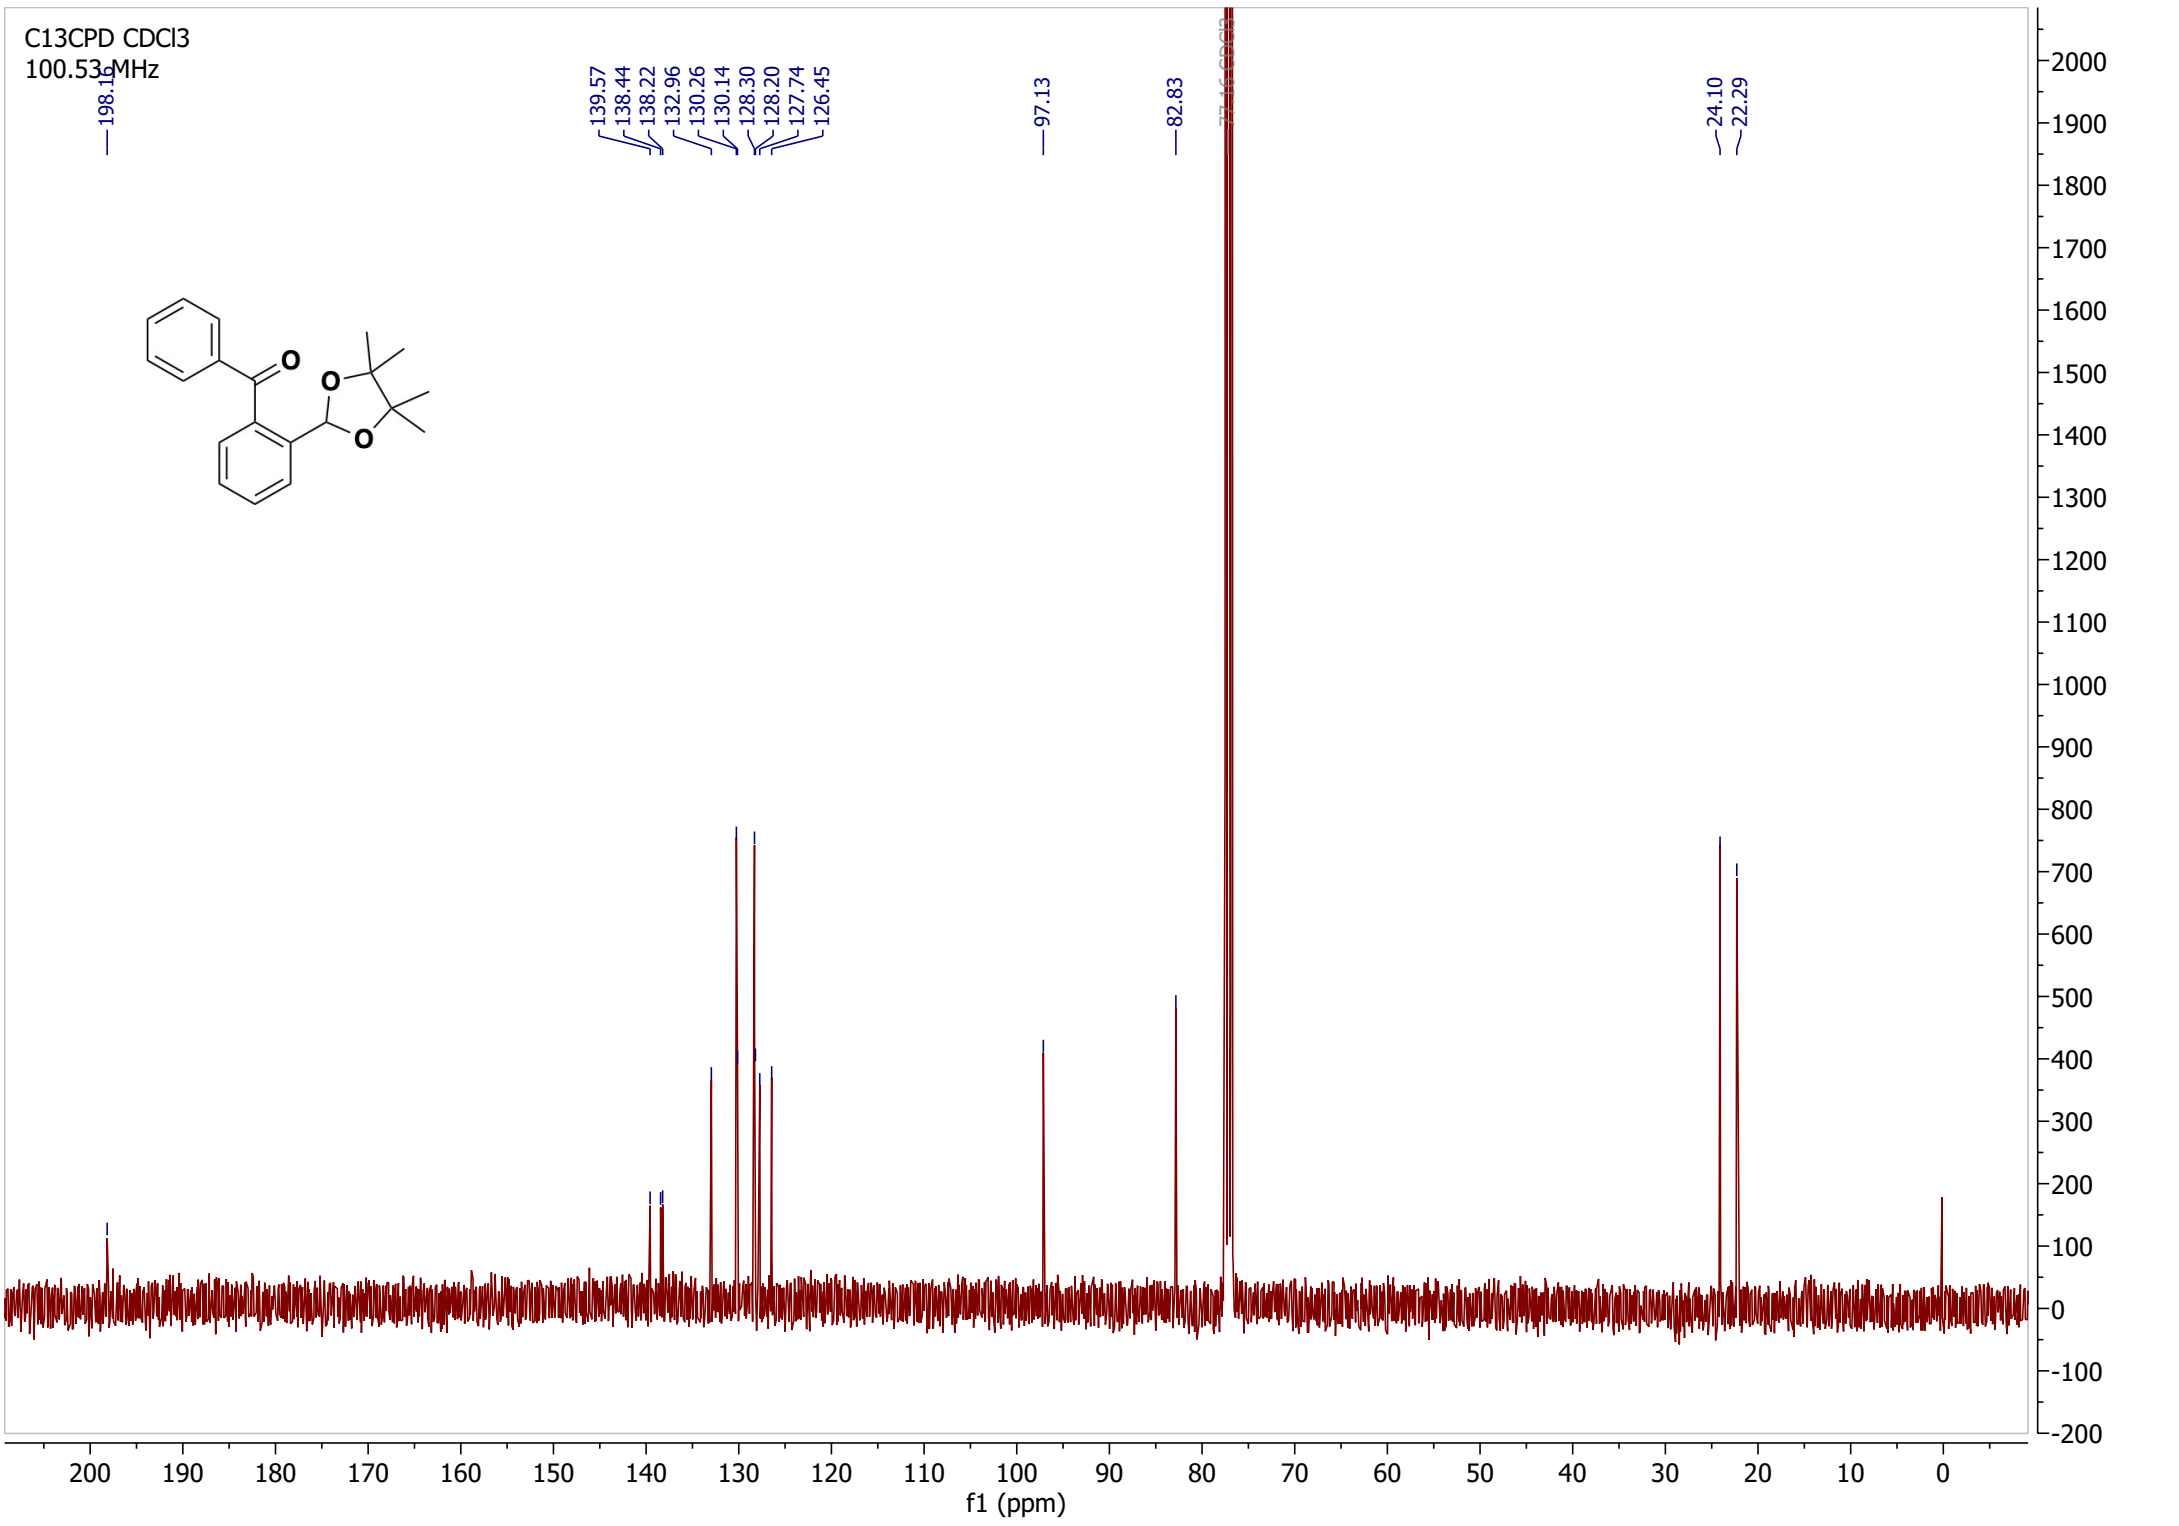

200 190 180 170 160 150 140 130 120 110 100 90 80 70 60 50 40 30 20 10 0

f1 (ppm)

2000  
1900  
1800  
1700  
1600  
1500  
1400  
1300  
1200  
1100  
1000  
900  
800  
700  
600  
500  
400  
300  
200  
100  
0  
-100  
-200



PROTON CDCl<sub>3</sub>  
399.77 MHz

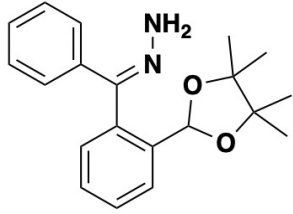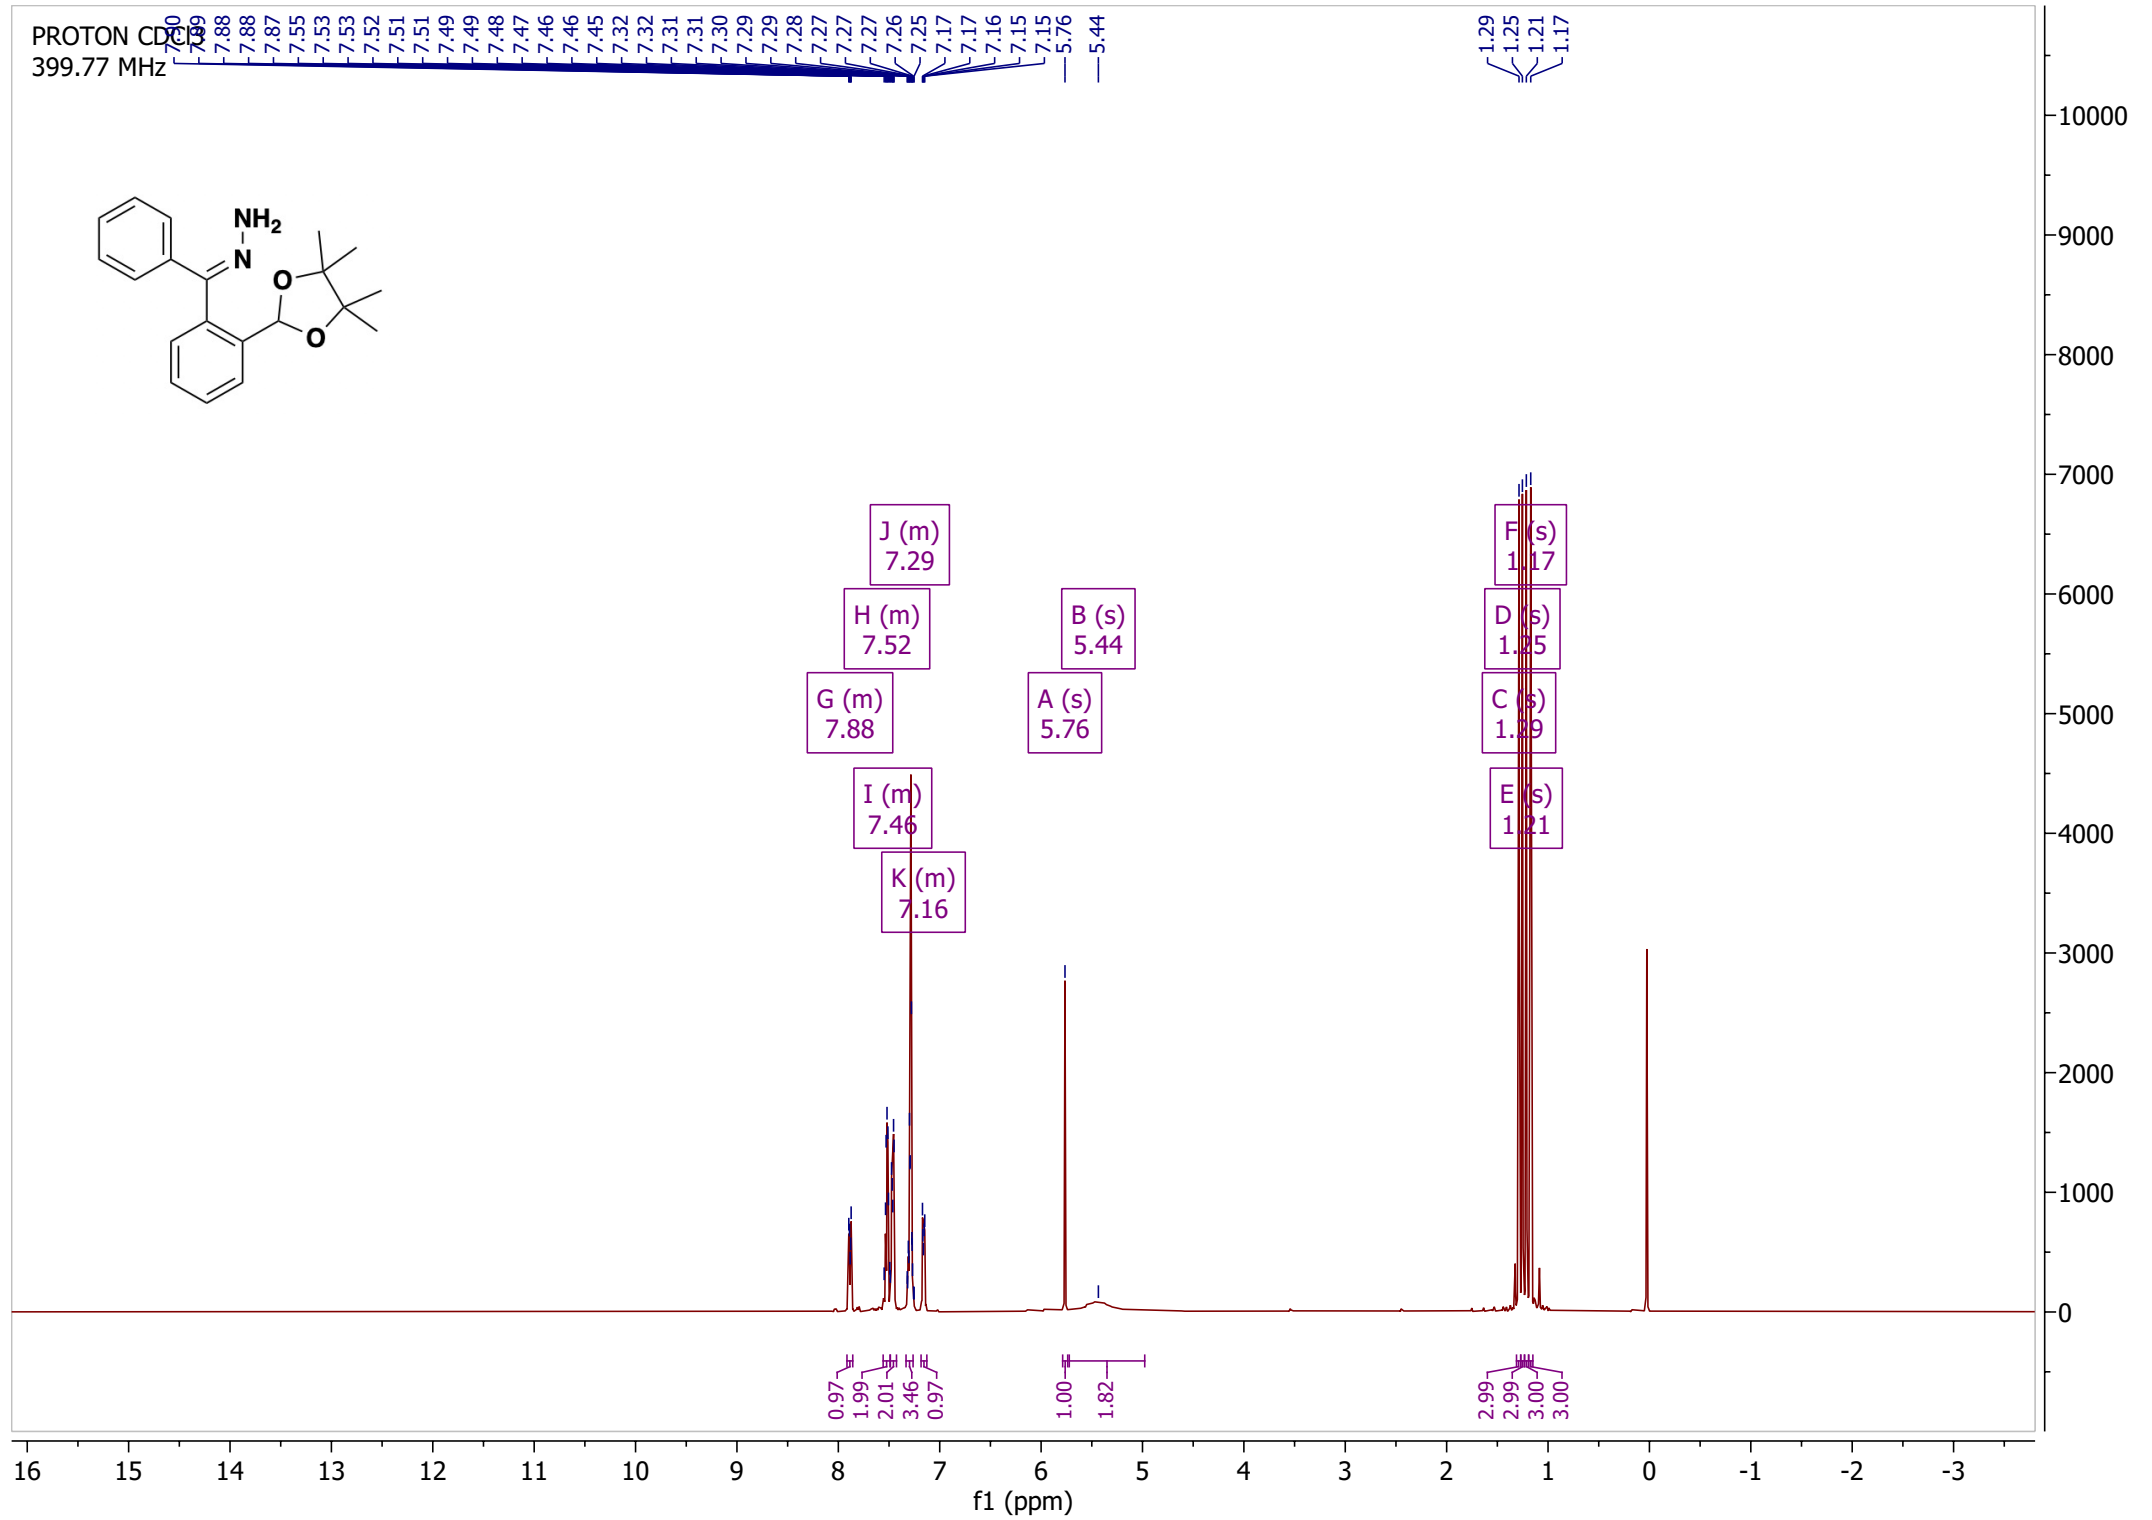

C13CPD CDCl3  
100.53 MHz

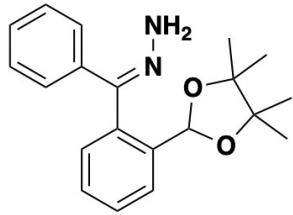

148.83  
138.45  
138.13  
133.07  
130.11  
129.37  
129.03  
128.22  
128.13  
126.85  
126.35

97.47

82.87  
82.76

24.70  
24.55  
22.42  
22.33

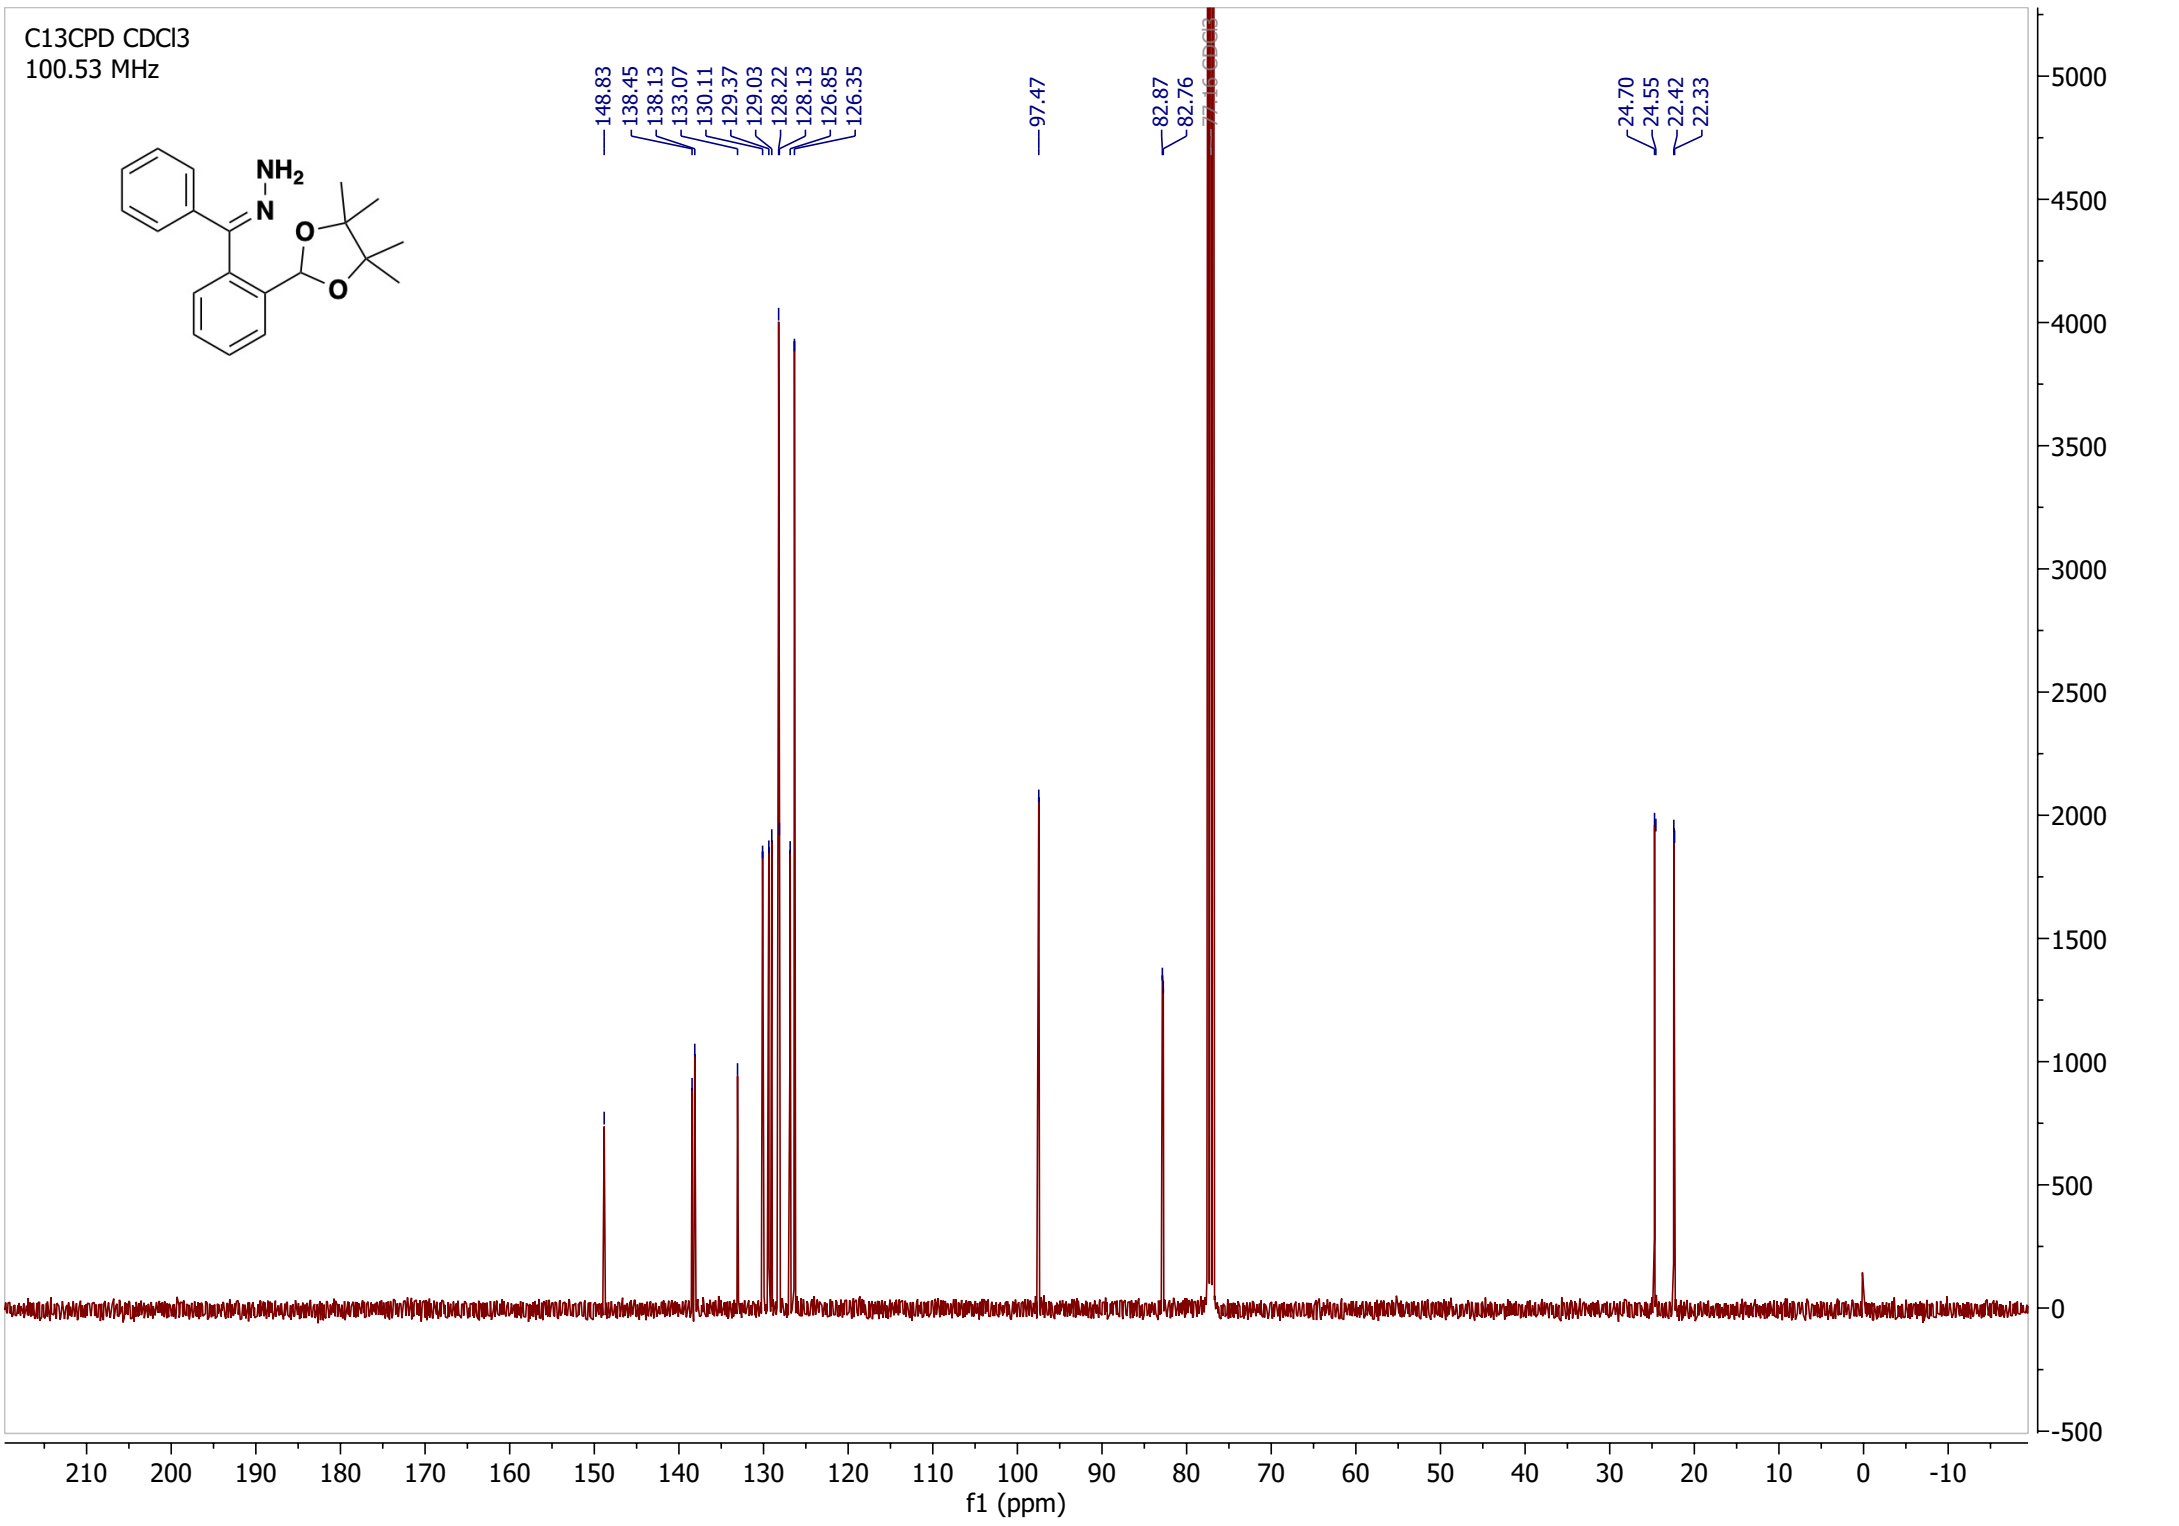

PROTON CDCl3

399.77 MHz

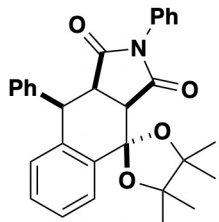

15f

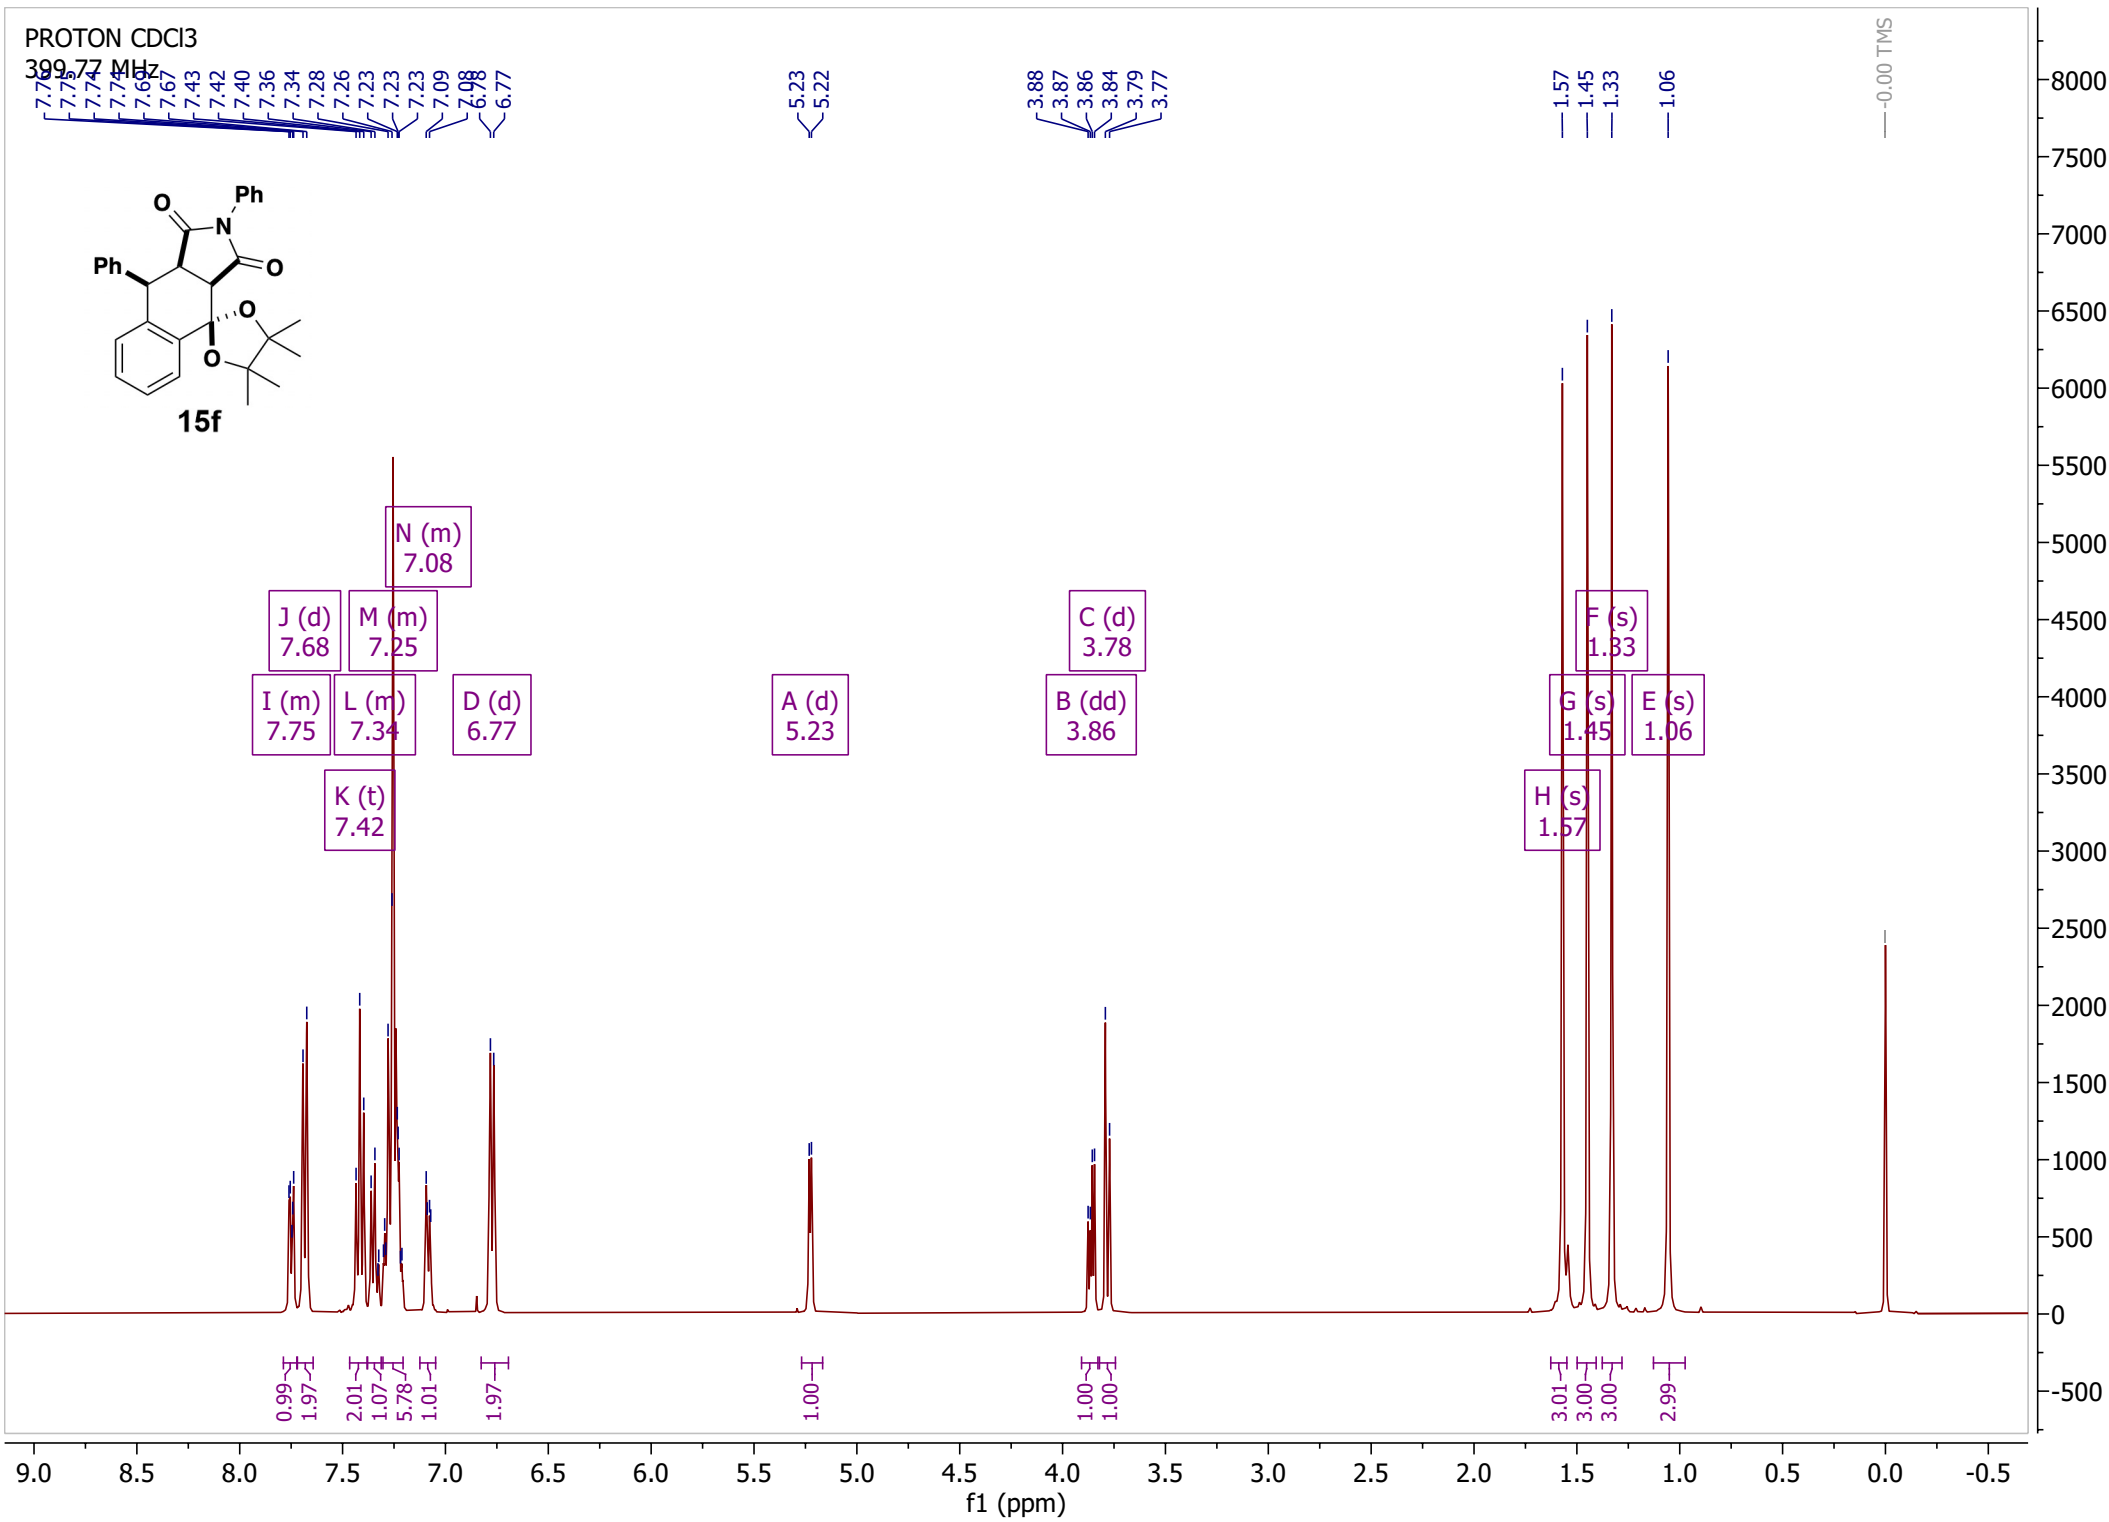

C13CPD CDCl3  
100.53 MHz

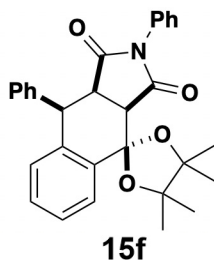

— 175.63  
— 172.39

138.76  
137.88  
137.02  
131.89  
131.20  
128.93  
128.83  
128.44  
128.14  
127.29  
126.57  
126.52  
126.20  
124.59

— 103.05

84.65  
83.95

— 55.01

45.31  
43.95

25.46  
24.66  
23.74  
23.62

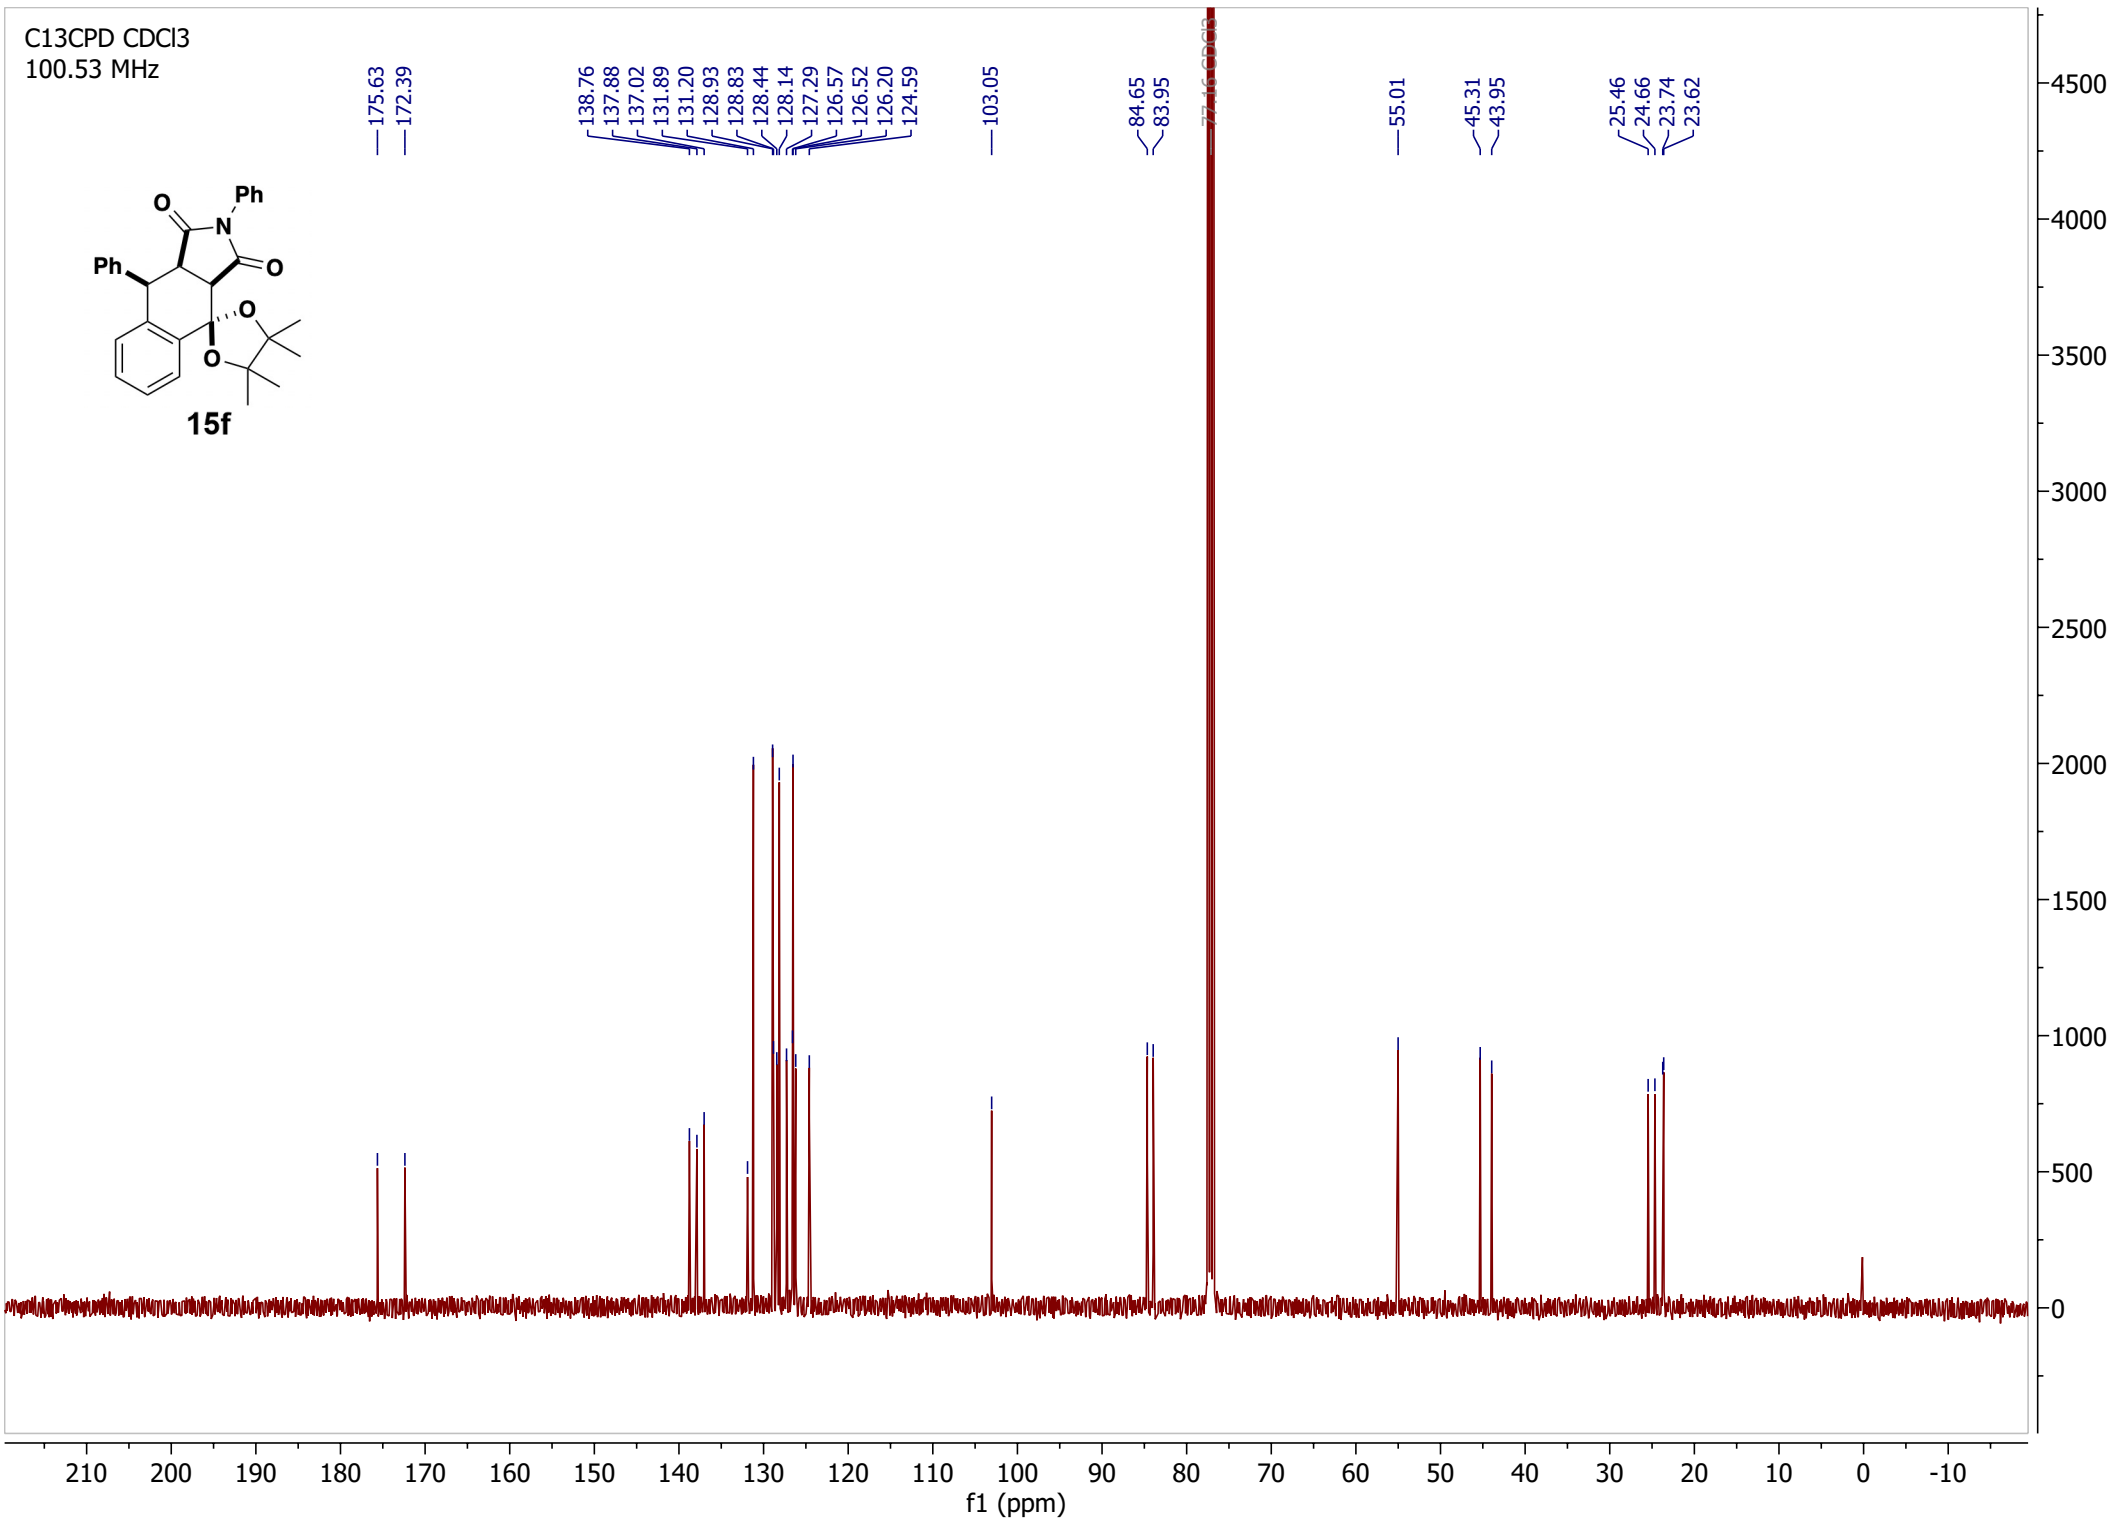

7f JTON Acetone  
101.77 MHz

7.76  
7.76  
7.74  
7.74  
7.70  
7.68  
7.66  
7.66  
7.65  
7.64  
7.64  
7.63  
7.62  
7.62  
7.58  
7.57  
7.56  
7.56  
7.54  
7.54  
7.52  
7.50  
7.50  
7.50  
7.49  
7.49  
7.48  
7.47  
7.46  
7.45  
7.34  
7.34  
7.32  
7.32

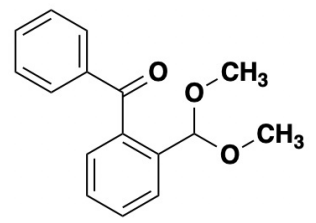

F (m)  
7.52

D (d)  
7.69

C (dd)  
7.75

G (dd)  
7.33

E (m)  
7.63

A (s)  
5.53

B (s)  
3.13

2.05 (CD<sub>3</sub>)<sub>2</sub>CO

1.96  
0.99  
1.01  
4.08  
1.03

0.97

6.00

9.0 8.5 8.0 7.5 7.0 6.5 6.0 5.5 5.0 4.5 4.0 3.5 3.0 2.5 2.0 1.5

f1 (ppm)

30000  
25000  
20000  
15000  
10000  
5000  
0

C13CPD Acetone  
100.53 MHz

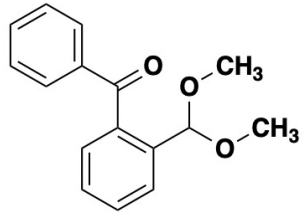

— 197.53

139.71  
138.48  
137.98  
133.78  
130.28  
129.28  
128.74  
128.57  
127.66

— 101.51

— 53.23

— 30.84 (CDCl<sub>3</sub>)

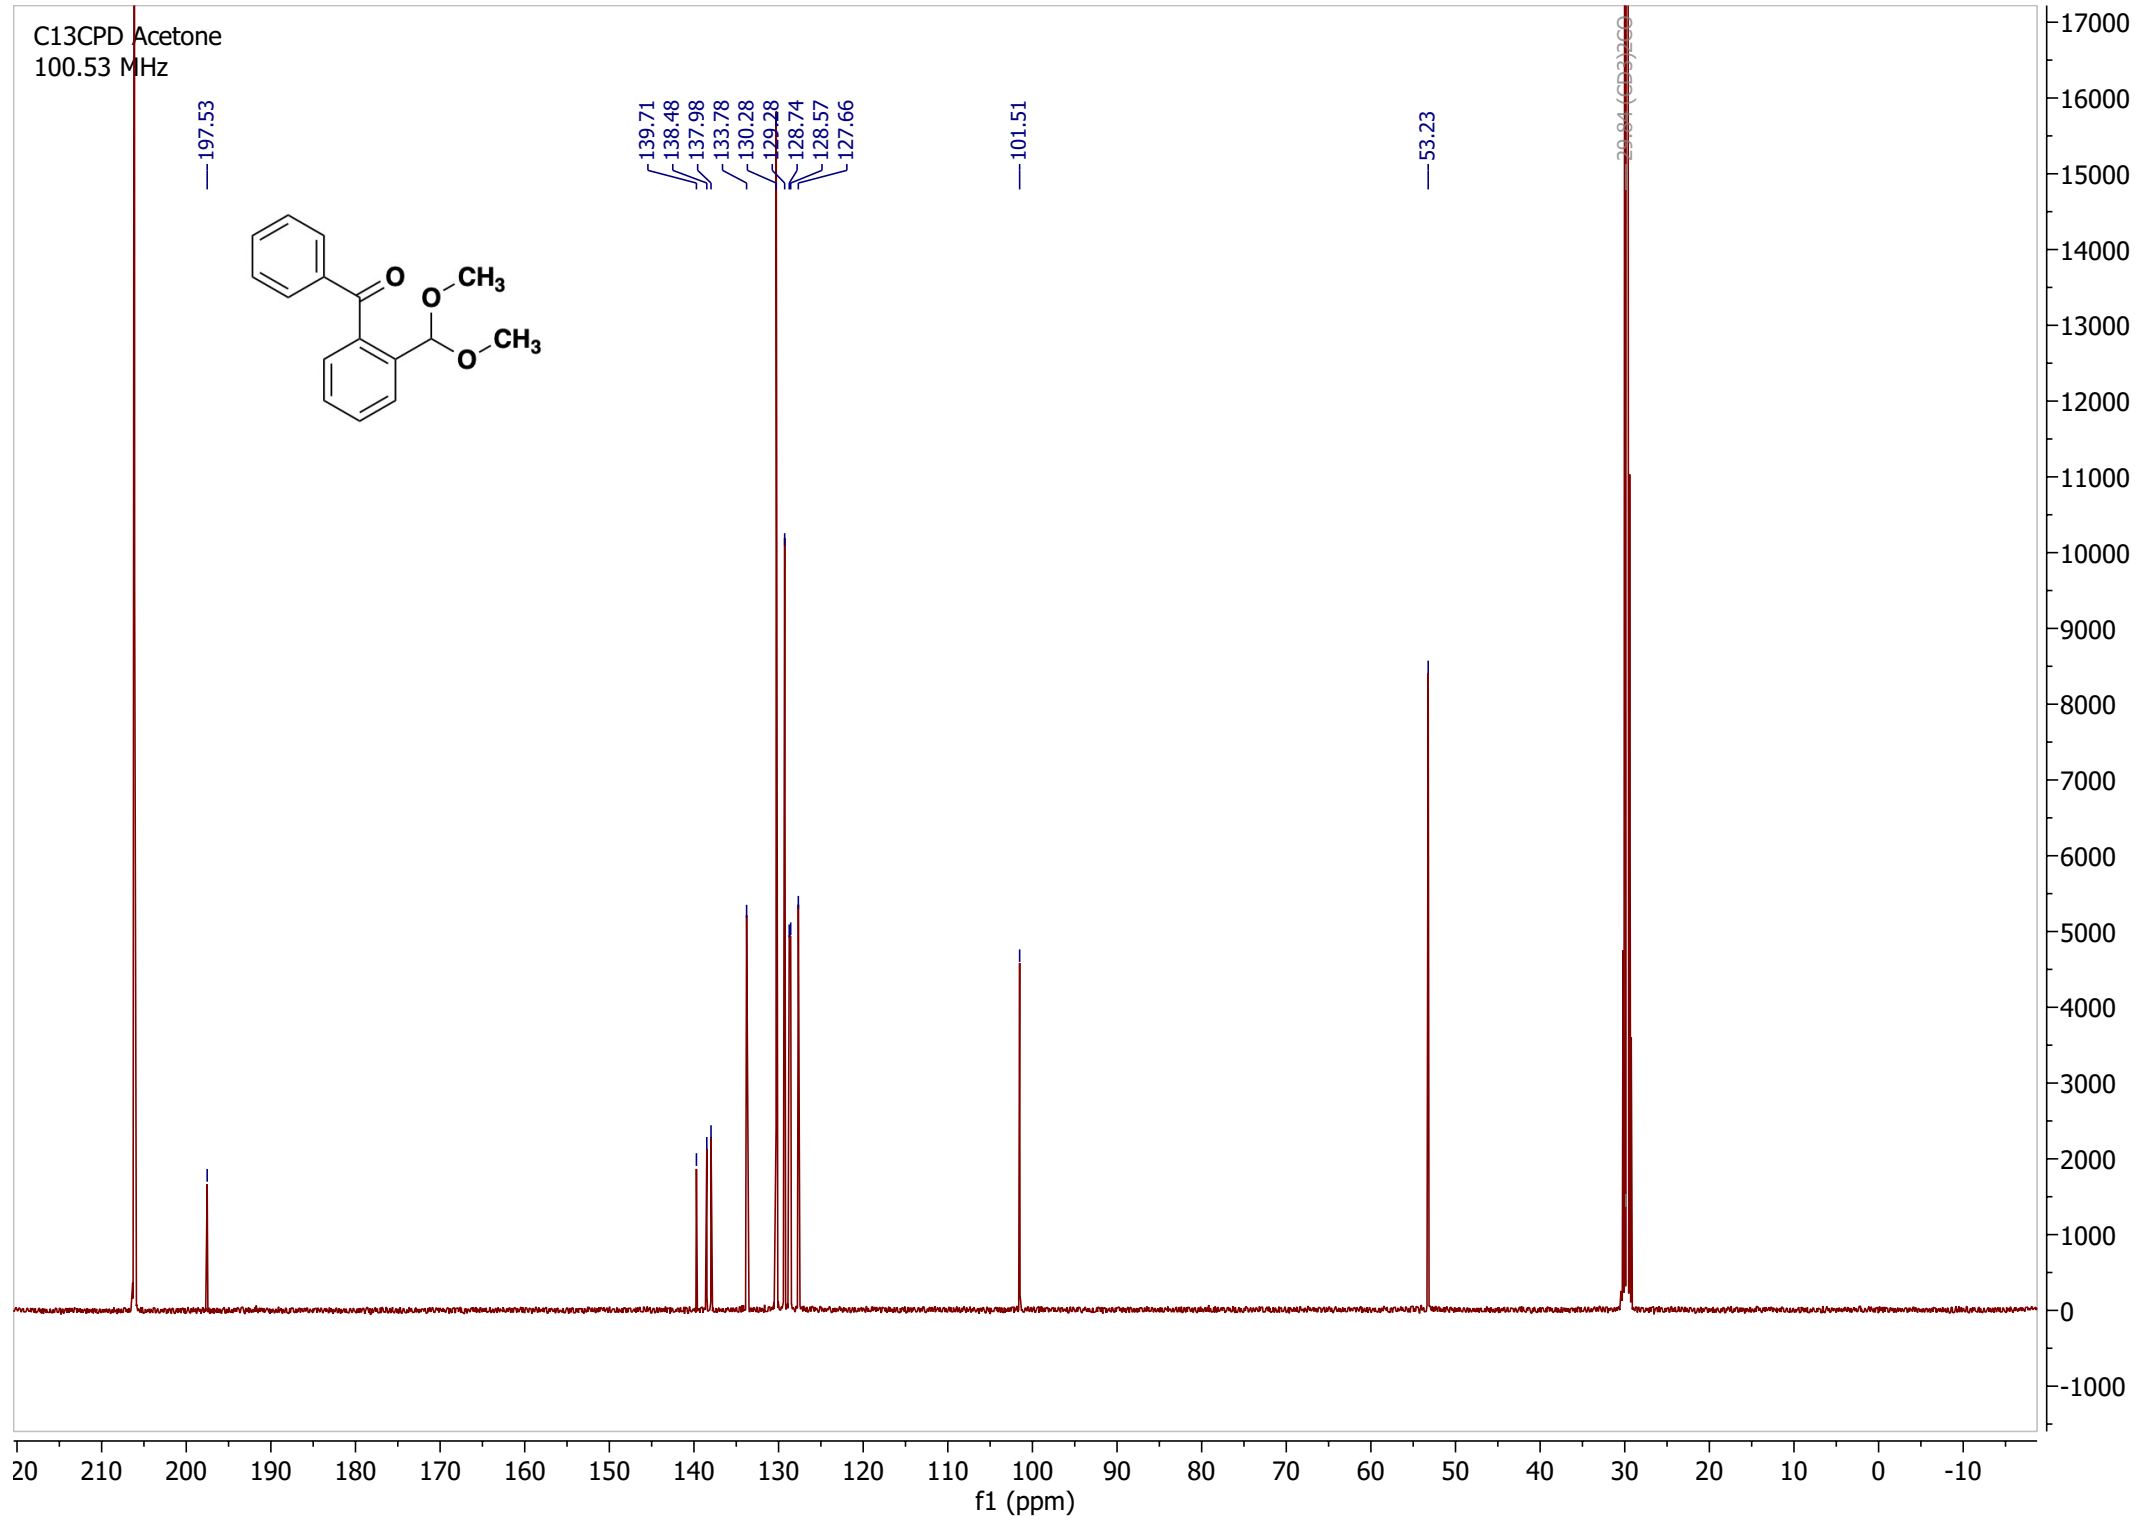

PROTON CDCl<sub>3</sub>  
599.47 MHz

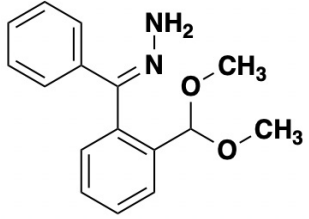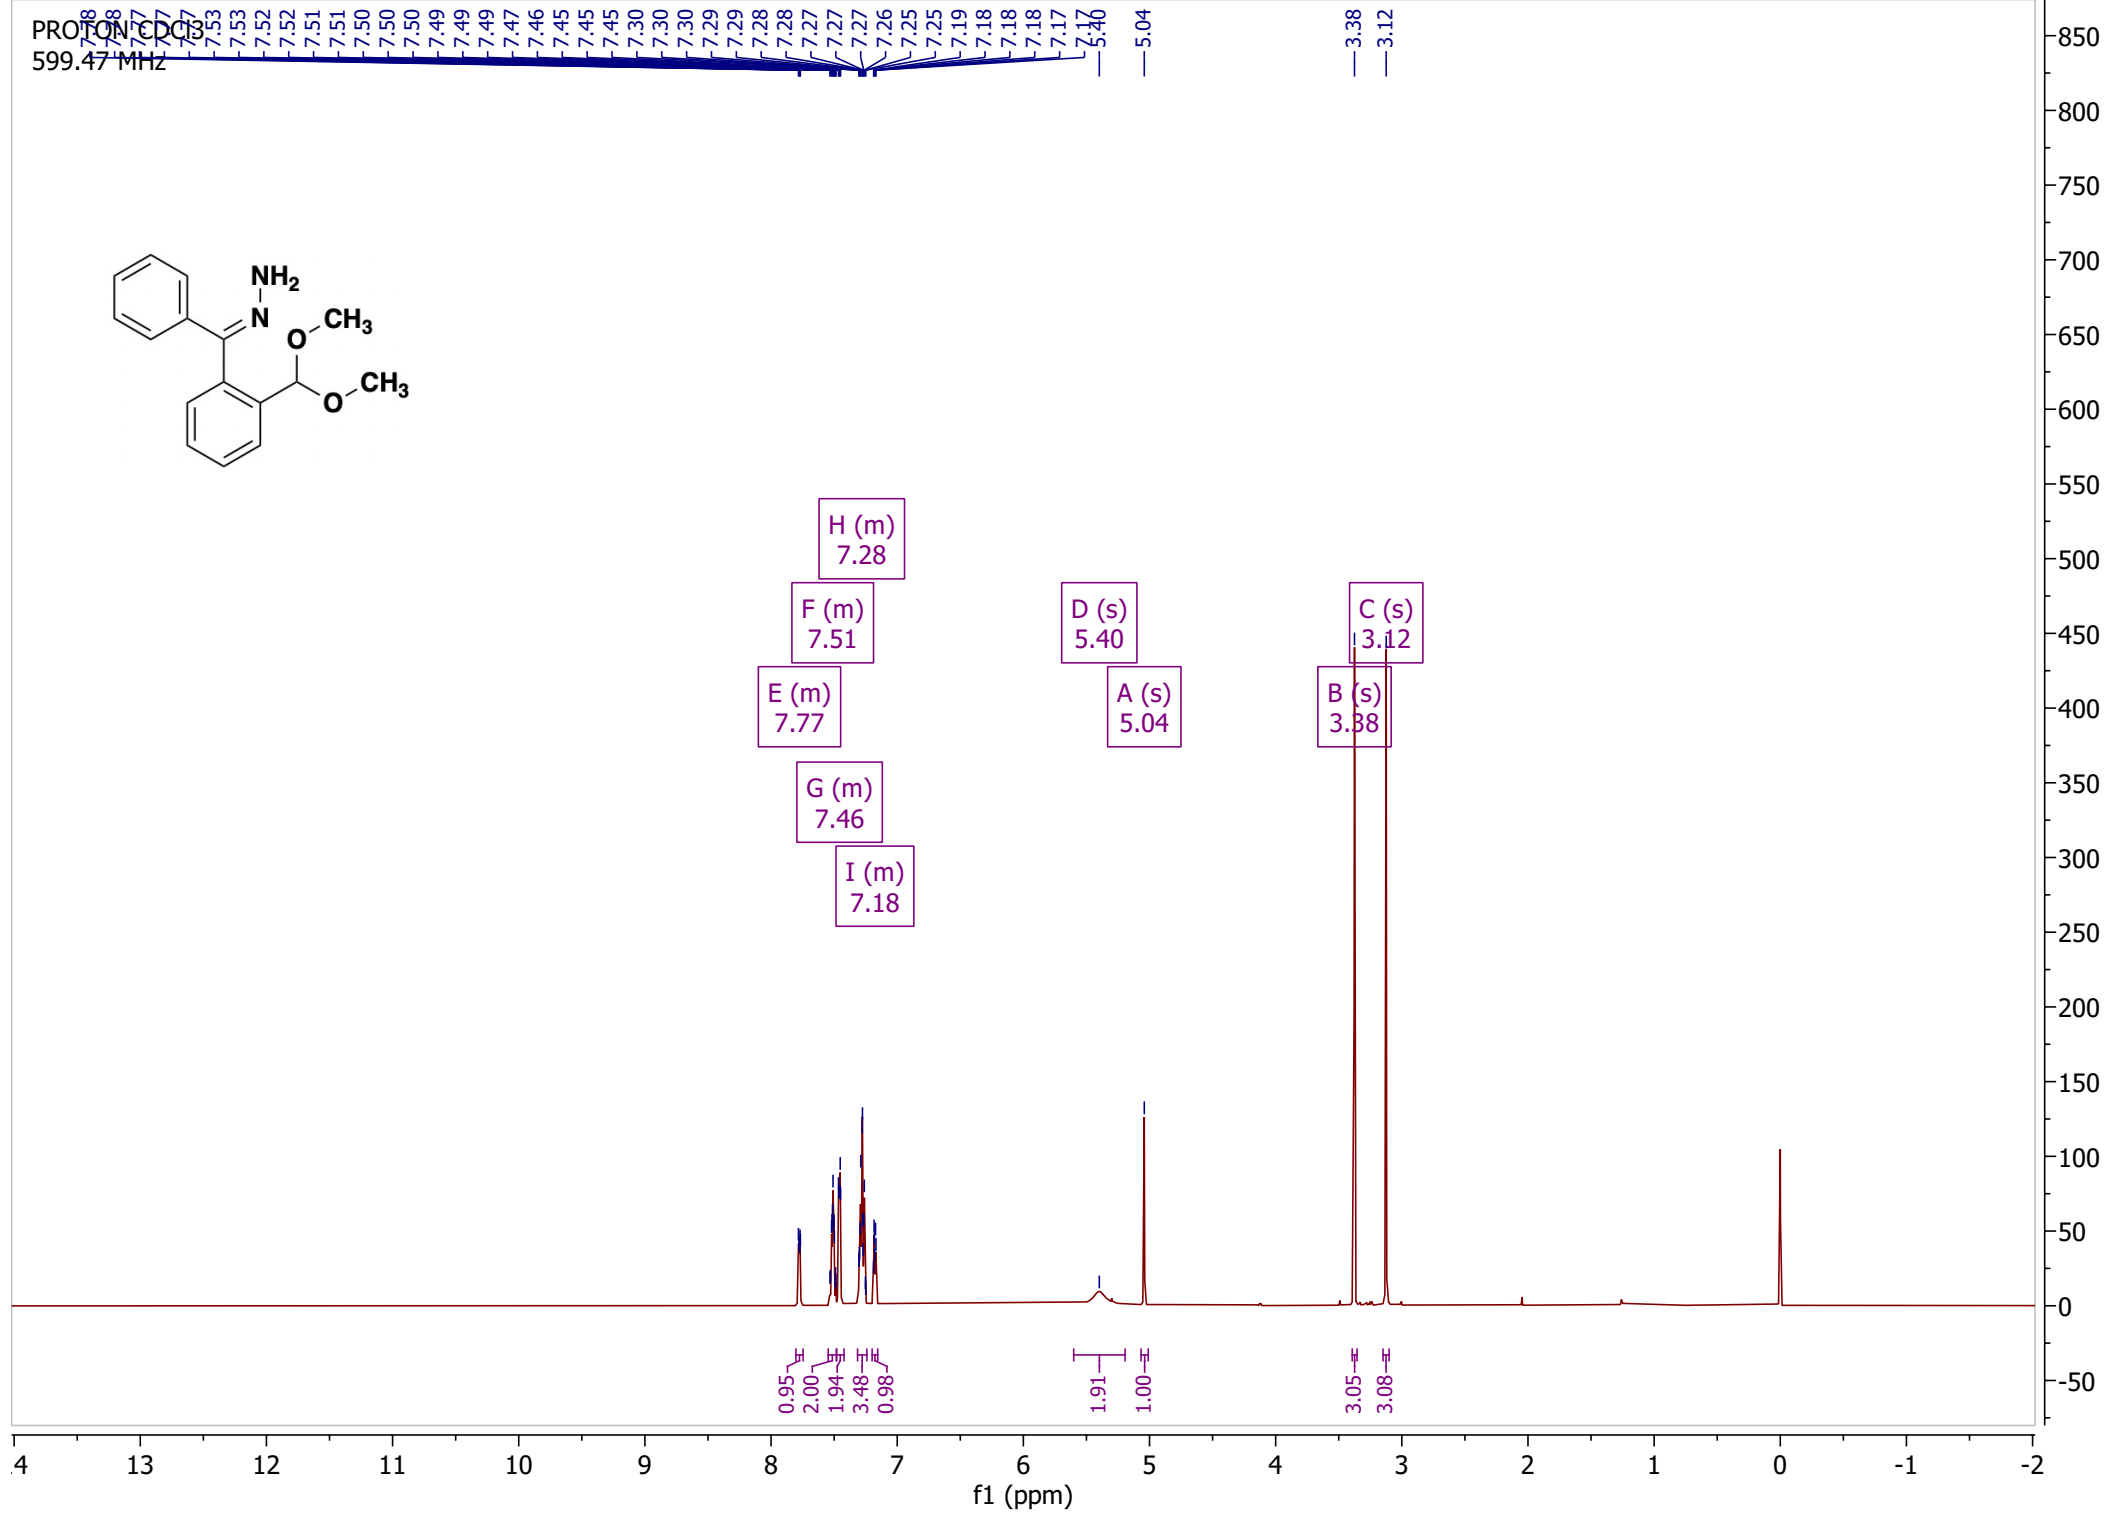

C13CPD CDCl3  
100.53 MHz

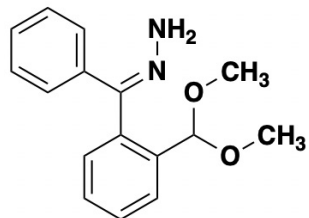

148.00  
138.23  
137.56  
132.31  
129.85  
129.31  
129.04  
128.25  
128.17  
126.91  
126.05

102.75

77.16 CDCl3

55.01  
54.46

210 200 190 180 170 160 150 140 130 120 110 100 90 80 70 60 50 40 30 20 10 0 -10

f1 (ppm)

17000  
16000  
15000  
14000  
13000  
12000  
11000  
10000  
9000  
8000  
7000  
6000  
5000  
4000  
3000  
2000  
1000  
0  
-1000



PROTON CDCl3

7.69  
7.66  
7.65  
7.58  
7.55  
7.53  
7.57  
7.56  
7.56  
7.48  
7.47  
7.46  
7.46  
7.40  
7.39  
7.38  
7.37  
7.37  
7.36  
7.36  
7.36  
7.35  
7.34  
7.33  
7.33  
7.32  
7.32  
7.31  
7.31  
7.30  
7.30  
7.30  
7.29  
7.29  
7.28  
7.27  
7.25  
7.05  
7.05  
7.03  
7.03  
5.06  
5.05  
3.87  
3.81  
3.80  
3.79  
3.77  
3.54  
3.05

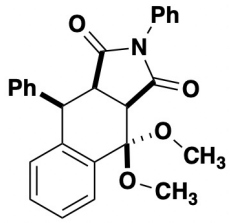

15g

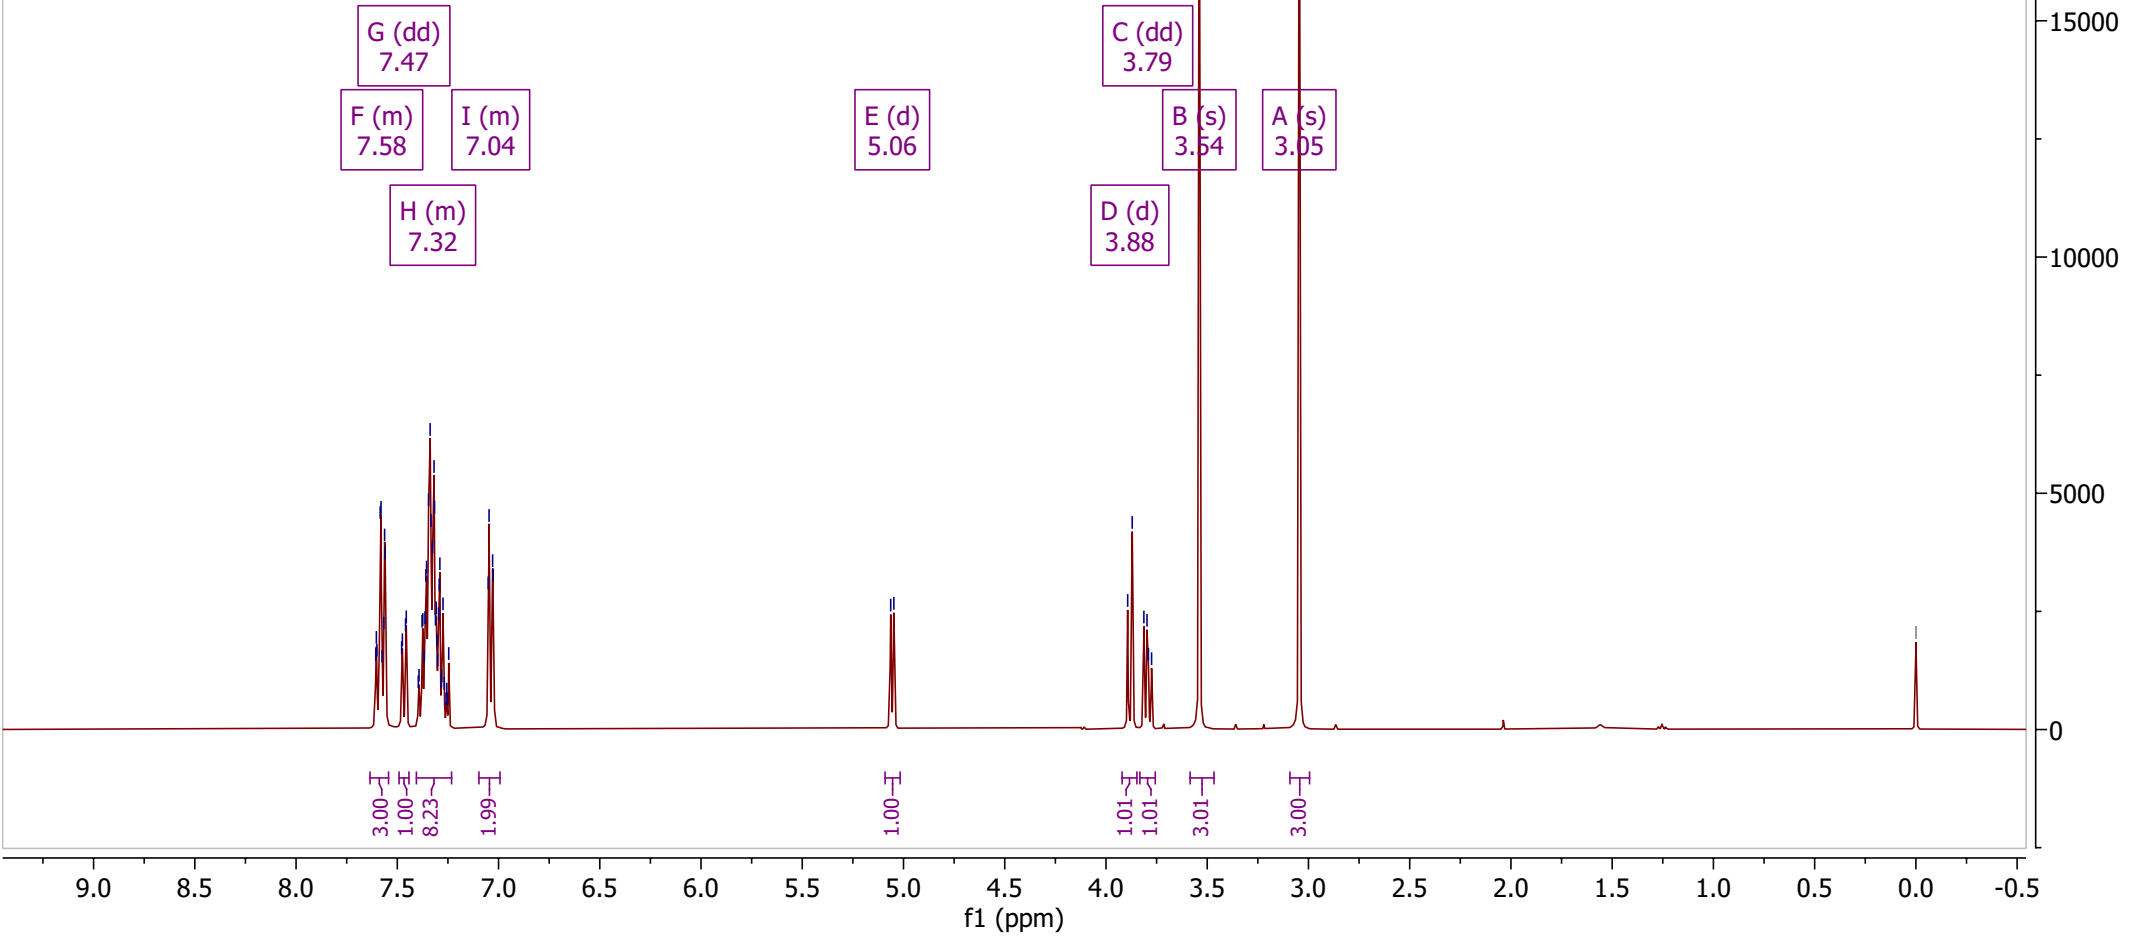

C13CPD CDCl3  
100.53 MHz

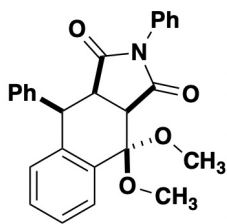

15g

174.11  
173.69

139.73  
136.85  
135.27  
131.96  
129.22  
129.08  
129.03  
128.48  
128.42  
128.38  
127.71  
127.45  
127.20  
126.58

81.05  
77.16 CDCl3  
75.62

57.39

51.33  
50.02  
44.18

210 200 190 180 170 160 150 140 130 120 110 100 90 80 70 60 50 40 30 20 10 0 -10

f1 (ppm)

8000  
7500  
7000  
6500  
6000  
5500  
5000  
4500  
4000  
3500  
3000  
2500  
2000  
1500  
1000  
500  
0  
-500

PROTON C6D6  
399.77 MHz

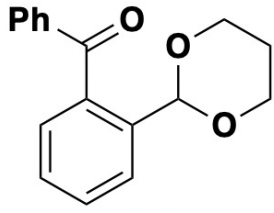

8.05  
8.03  
7.91  
7.91  
7.89  
7.89  
7.19  
7.19  
7.17  
7.17  
7.16 C6D6  
7.13  
7.13  
7.12  
7.12  
7.12  
7.11  
7.10  
7.10  
7.09  
7.09  
7.08  
7.08  
7.06  
7.06  
7.04  
7.04  
7.02  
7.02  
7.02  
6.98  
6.97  
6.97  
6.96  
6.96  
6.95  
6.95  
6.94  
6.93  
5.94  
3.70  
3.70  
3.69  
3.68  
3.68  
3.67  
3.67  
3.66  
3.65  
3.65  
3.35  
3.34  
3.32  
3.32  
3.31  
3.29  
3.28  
1.74  
1.72  
1.70  
1.69  
1.68  
1.67  
1.66  
1.64  
0.50  
0.50  
0.50  
0.49  
0.49  
0.49  
0.47  
0.47  
0.46  
0.46  
0.46  
0.46

G (m) 7.90  
F (d) 8.04  
I (m) 7.07  
H (m) 6.96  
A (s) 5.94  
C (td) 3.32  
B (m) 3.68  
D (m) 1.69  
E (m) 0.48

J (m) 7.18

0.99  
1.93  
1.12  
4.06  
1.05  
1.00  
2.02  
2.06  
1.06  
1.09

14 13 12 11 10 9 8 7 6 5 4 3 2 1 0  
f1 (ppm)

11000  
10000  
9000  
8000  
7000  
6000  
5000  
4000  
3000  
2000  
1000  
0  
-1000

C13CPD C6D6  
100.53 MHz

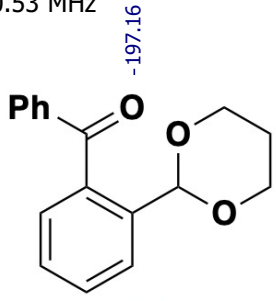

138.77  
138.74  
138.44  
132.60  
132.58  
130.38  
129.79  
128.37  
128.23  
128.06 C6D6  
126.53

98.89

67.08

25.75

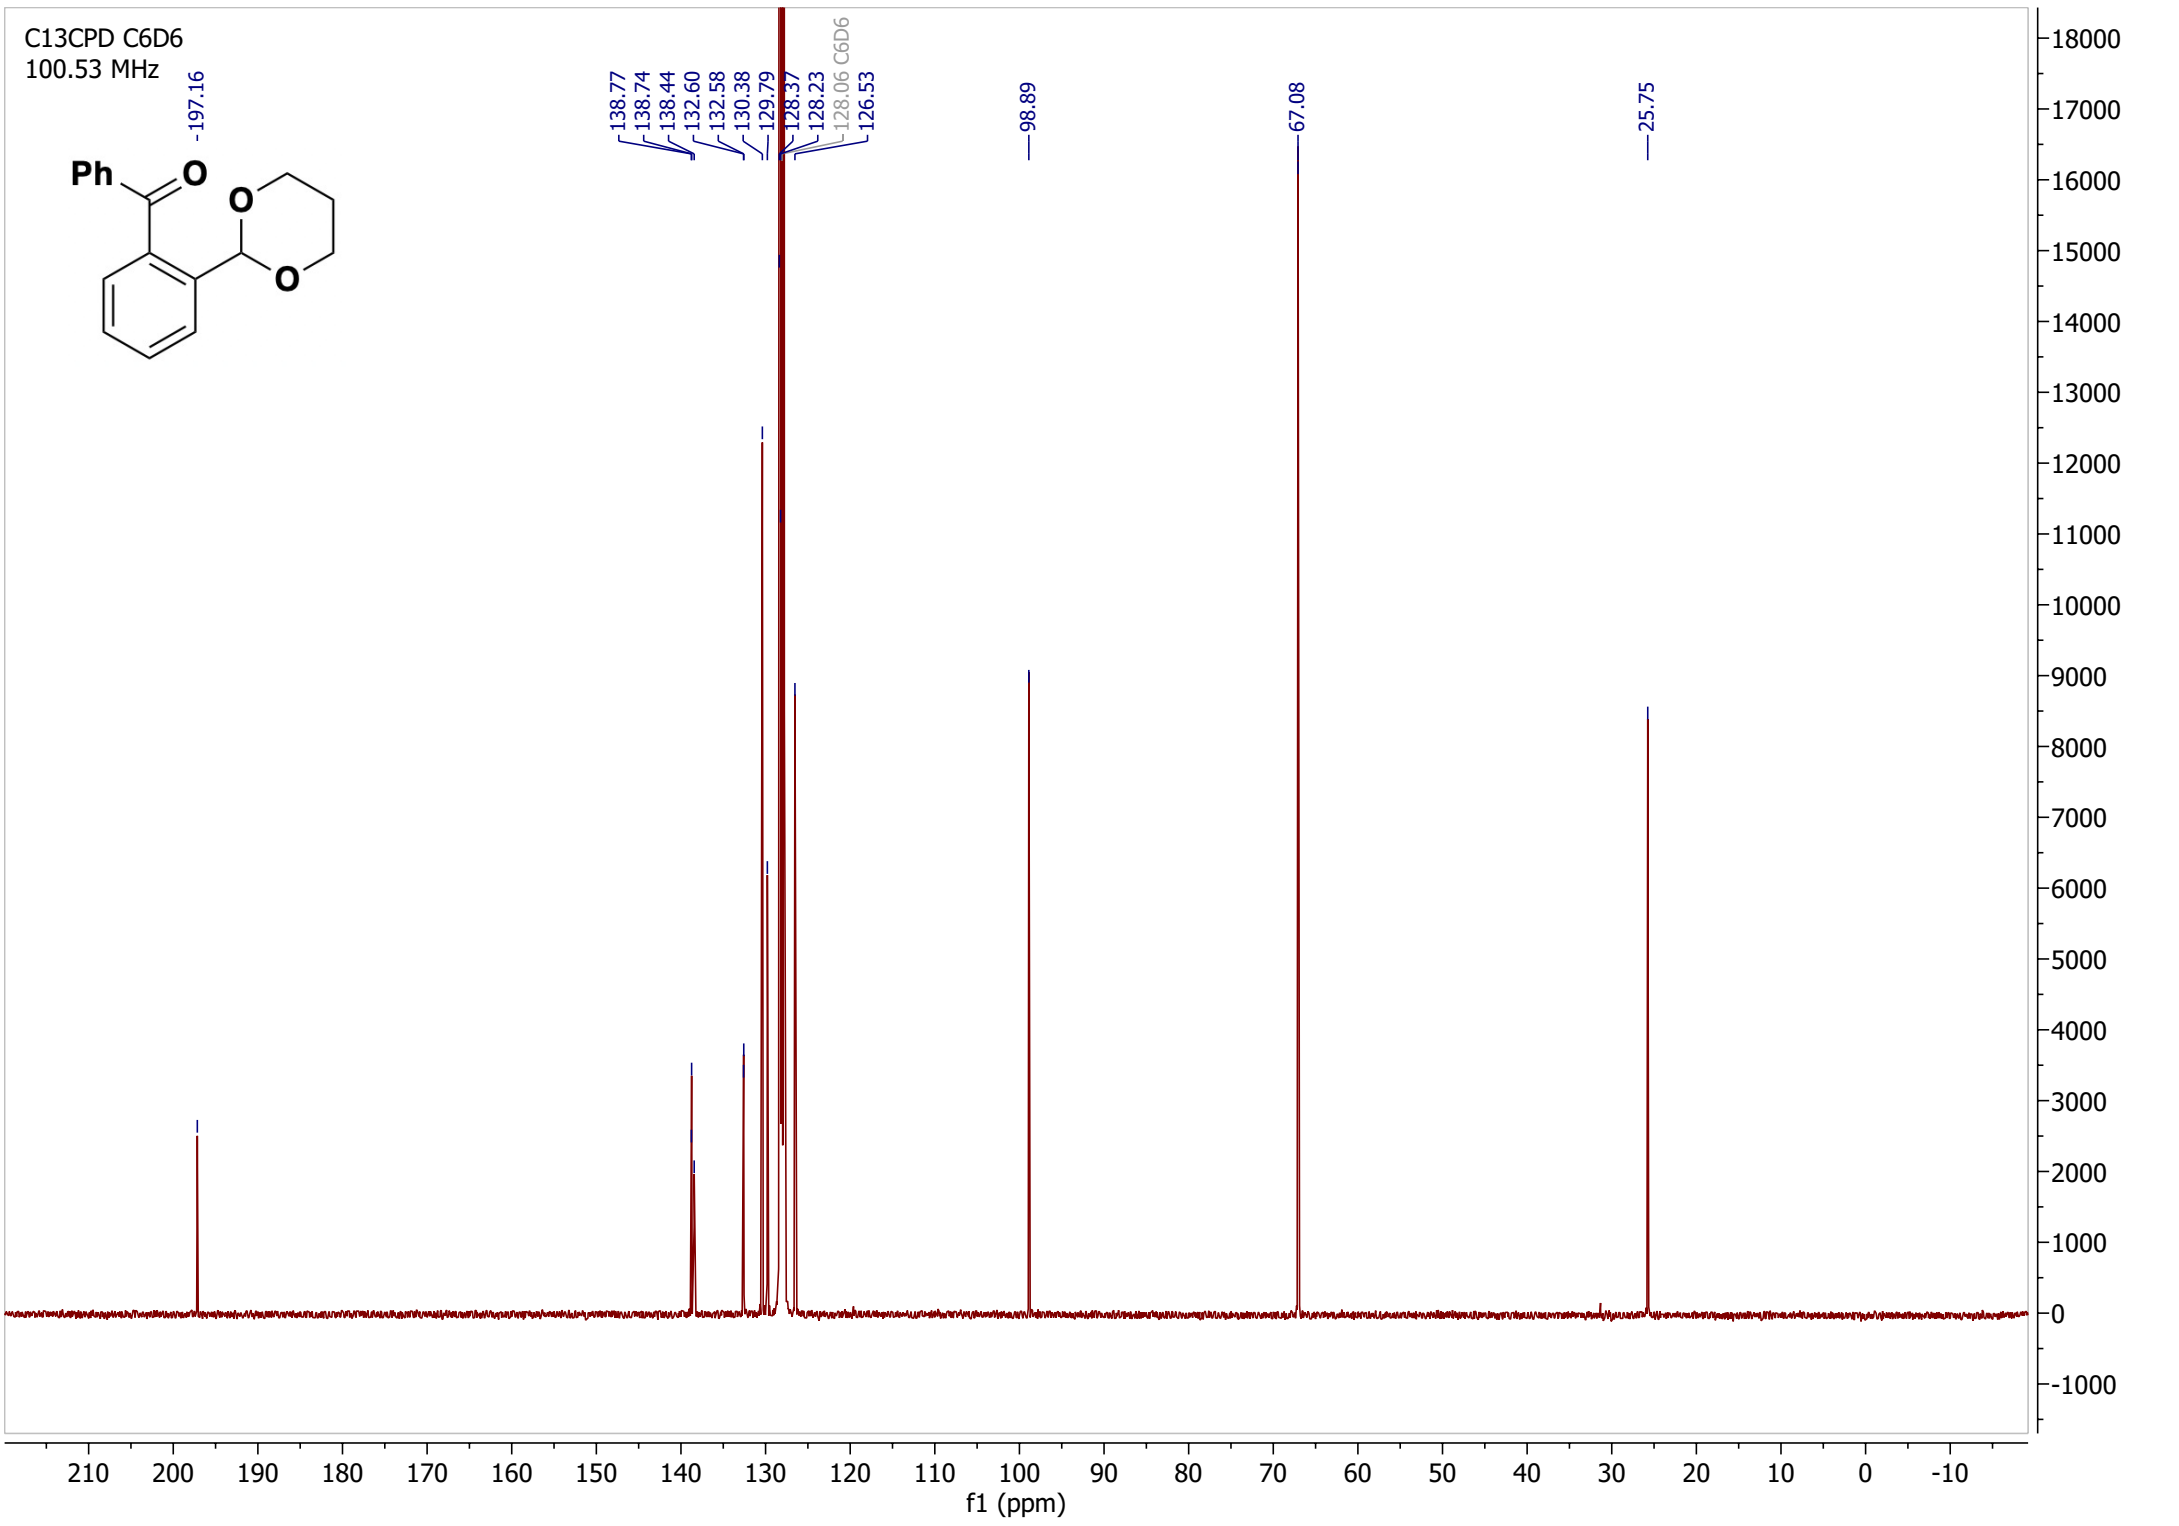

PROTON CDCl3

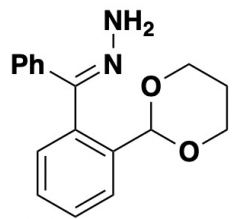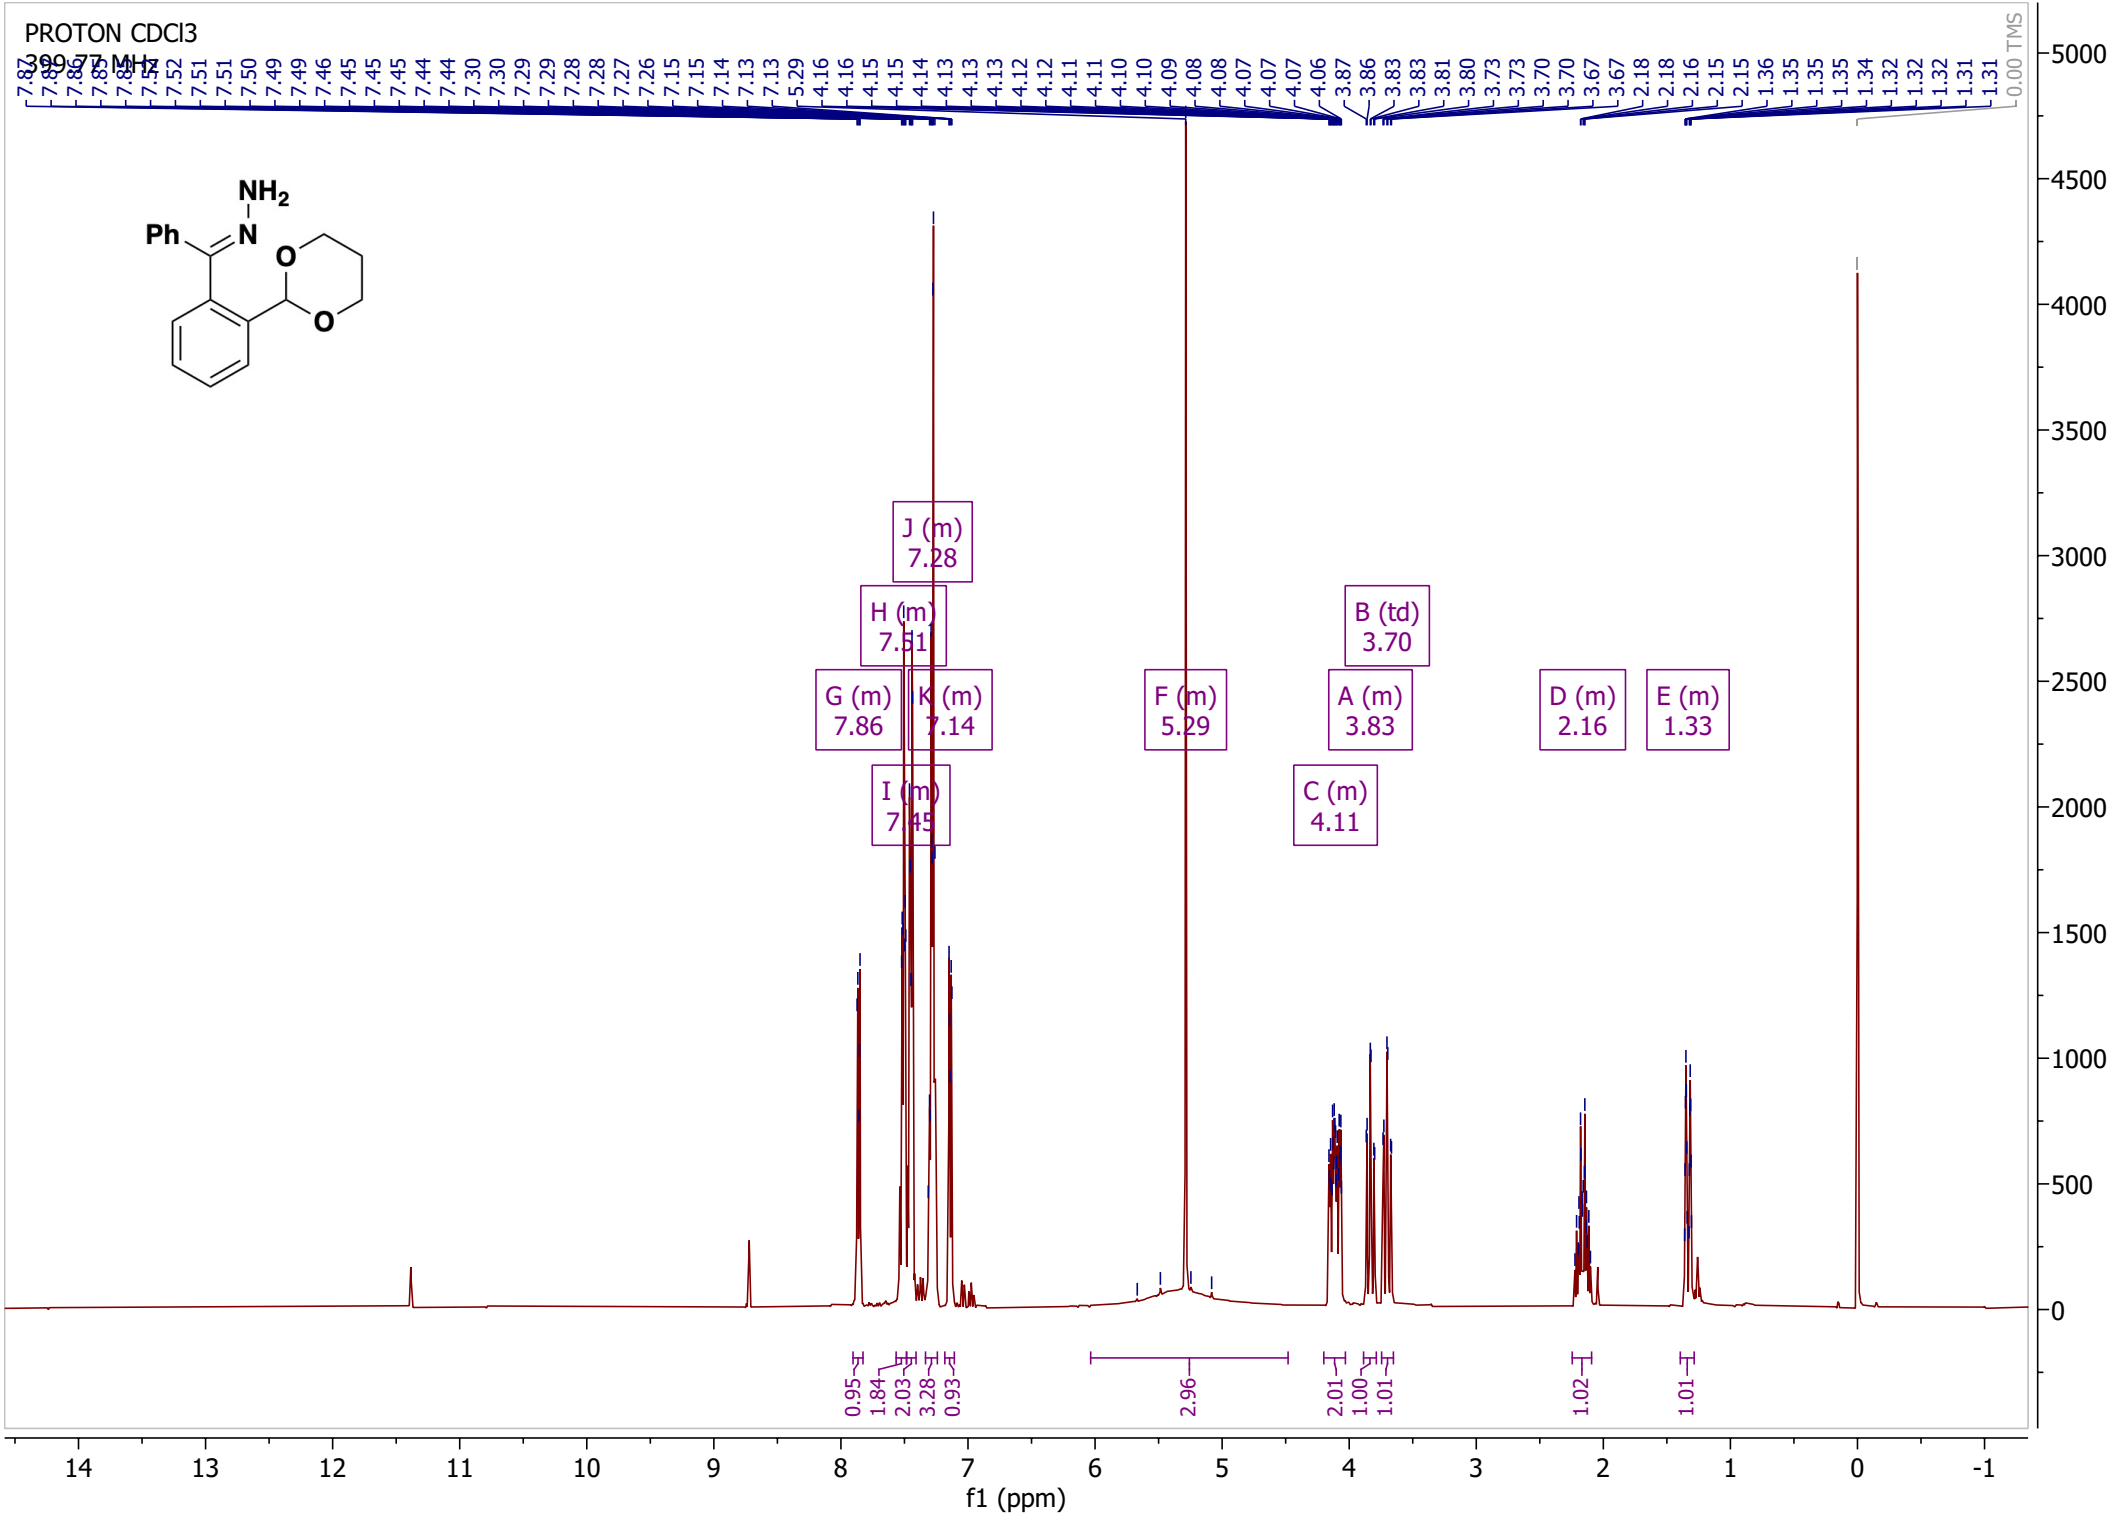

C13CPD CDCl3  
100.53 MHz

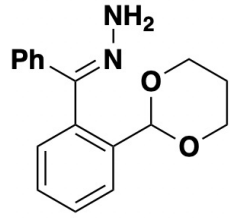

148.35  
138.42  
137.41  
131.88  
130.28  
129.61  
128.85  
128.31  
128.19  
127.01  
126.30

99.82

77.16  
77.00  
76.84

67.57  
67.49

25.77

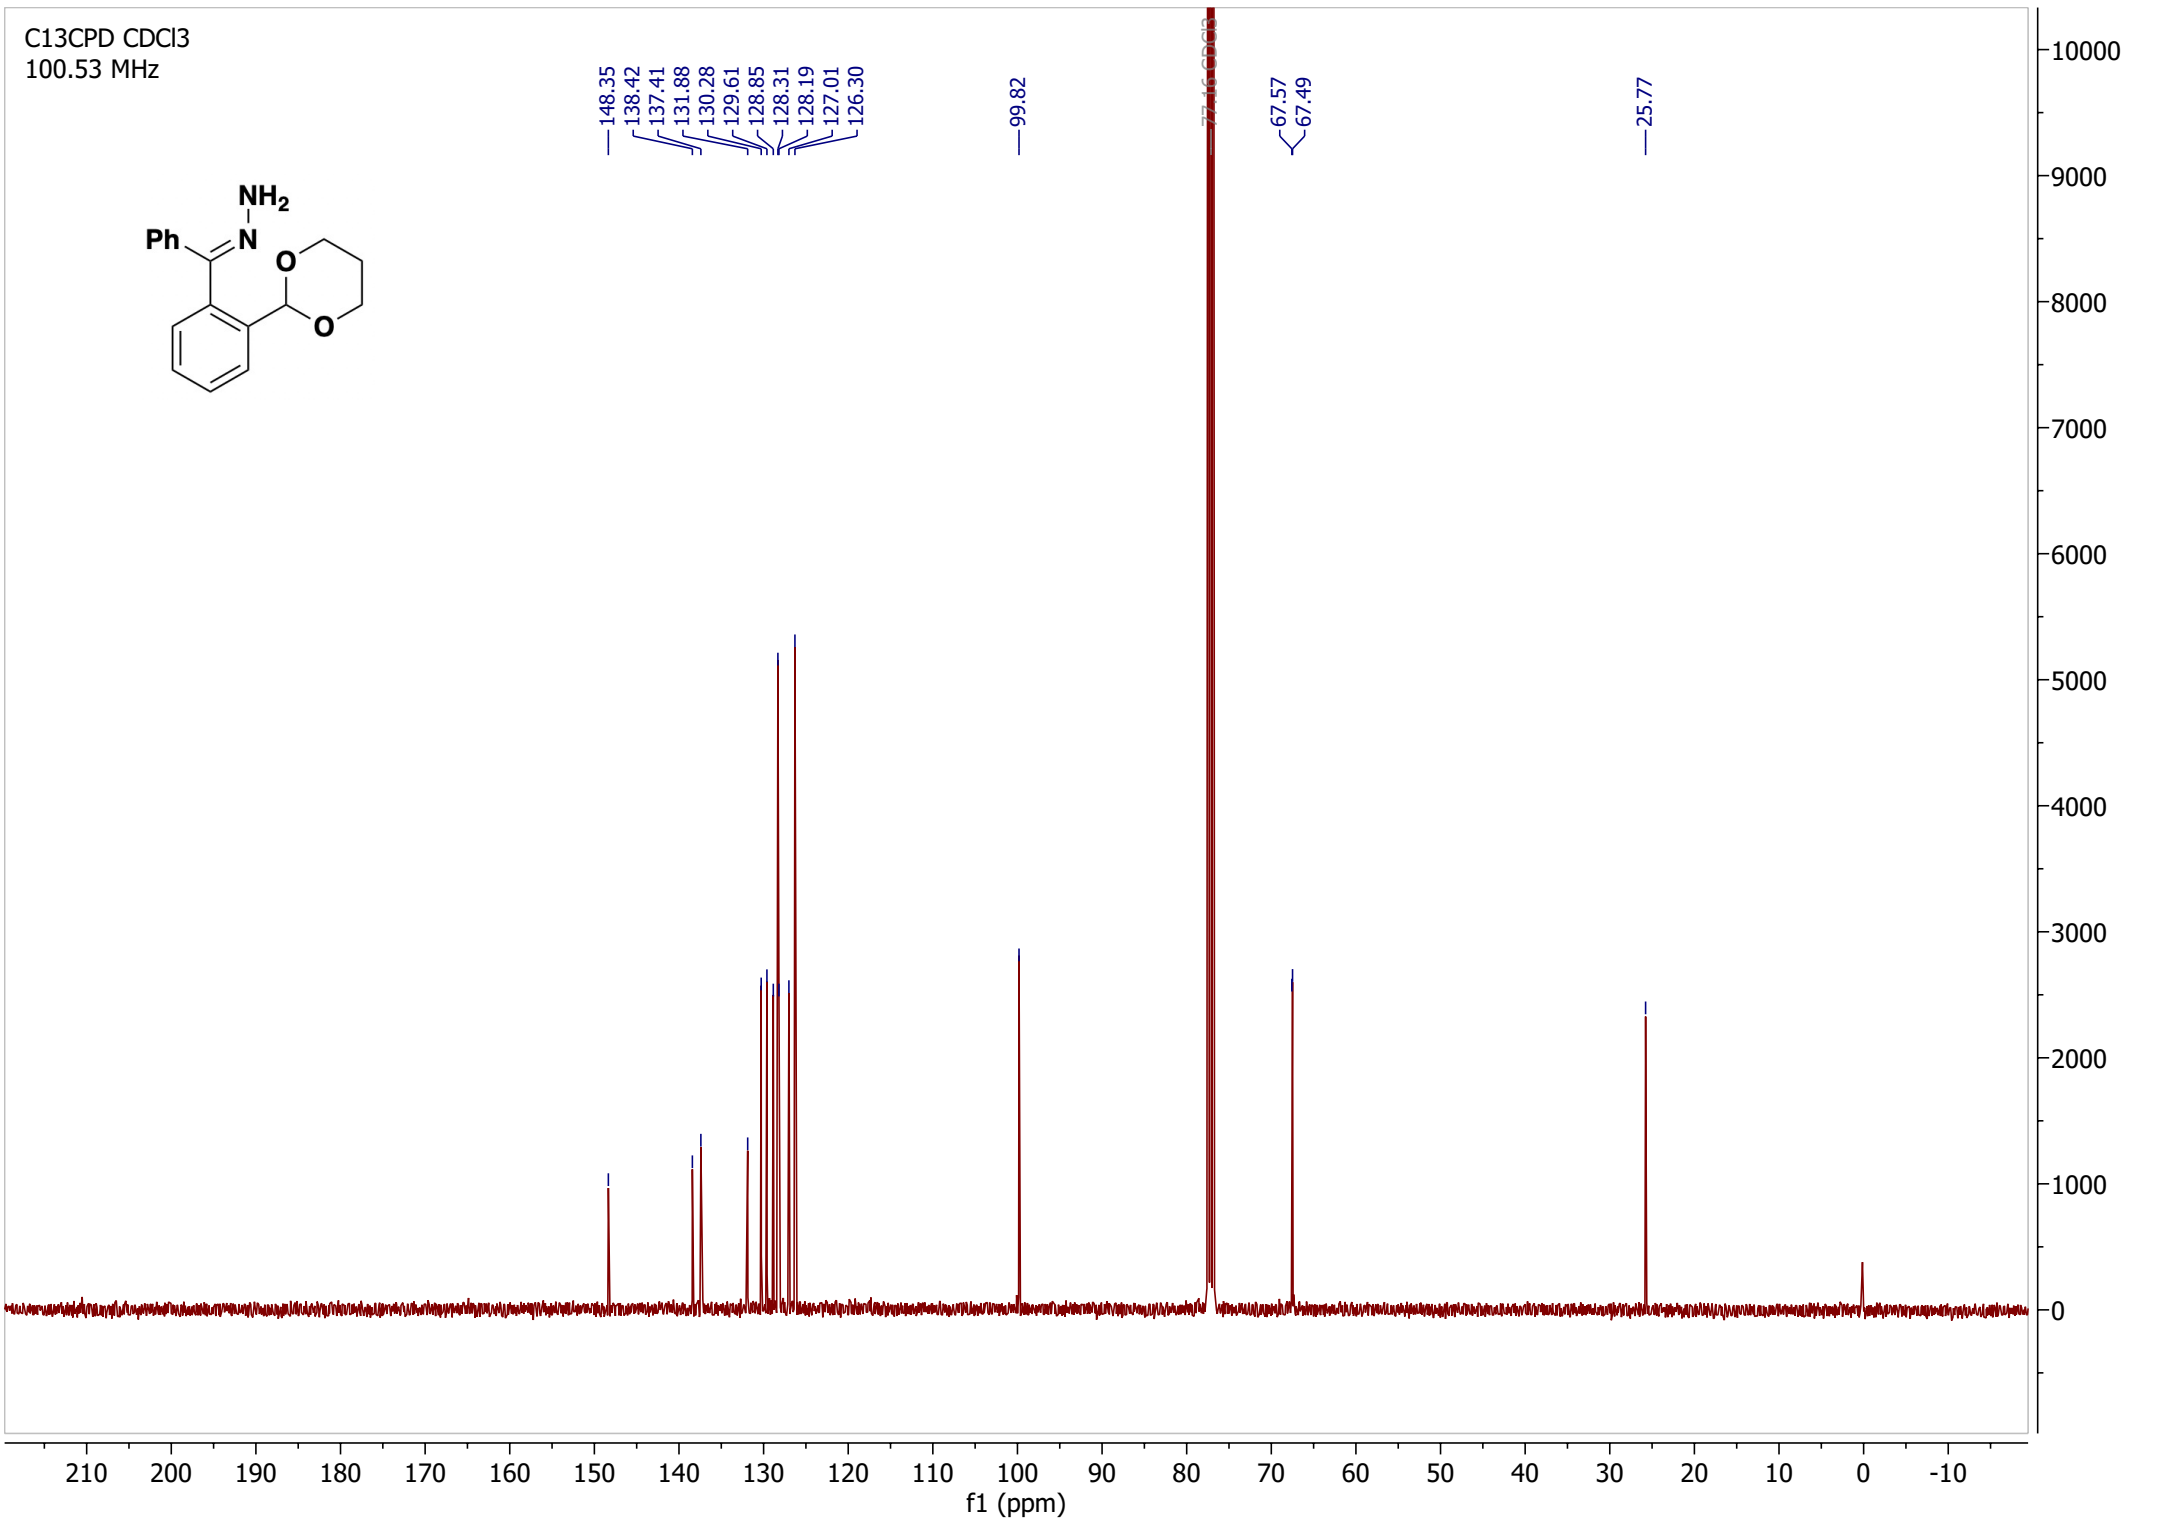

210 200 190 180 170 160 150 140 130 120 110 100 90 80 70 60 50 40 30 20 10 0 -10

f1 (ppm)

PROTON CDCl3  
399.77 MHz

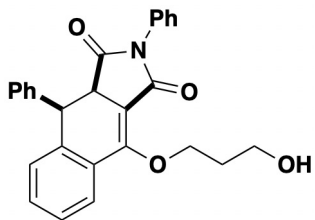

15h

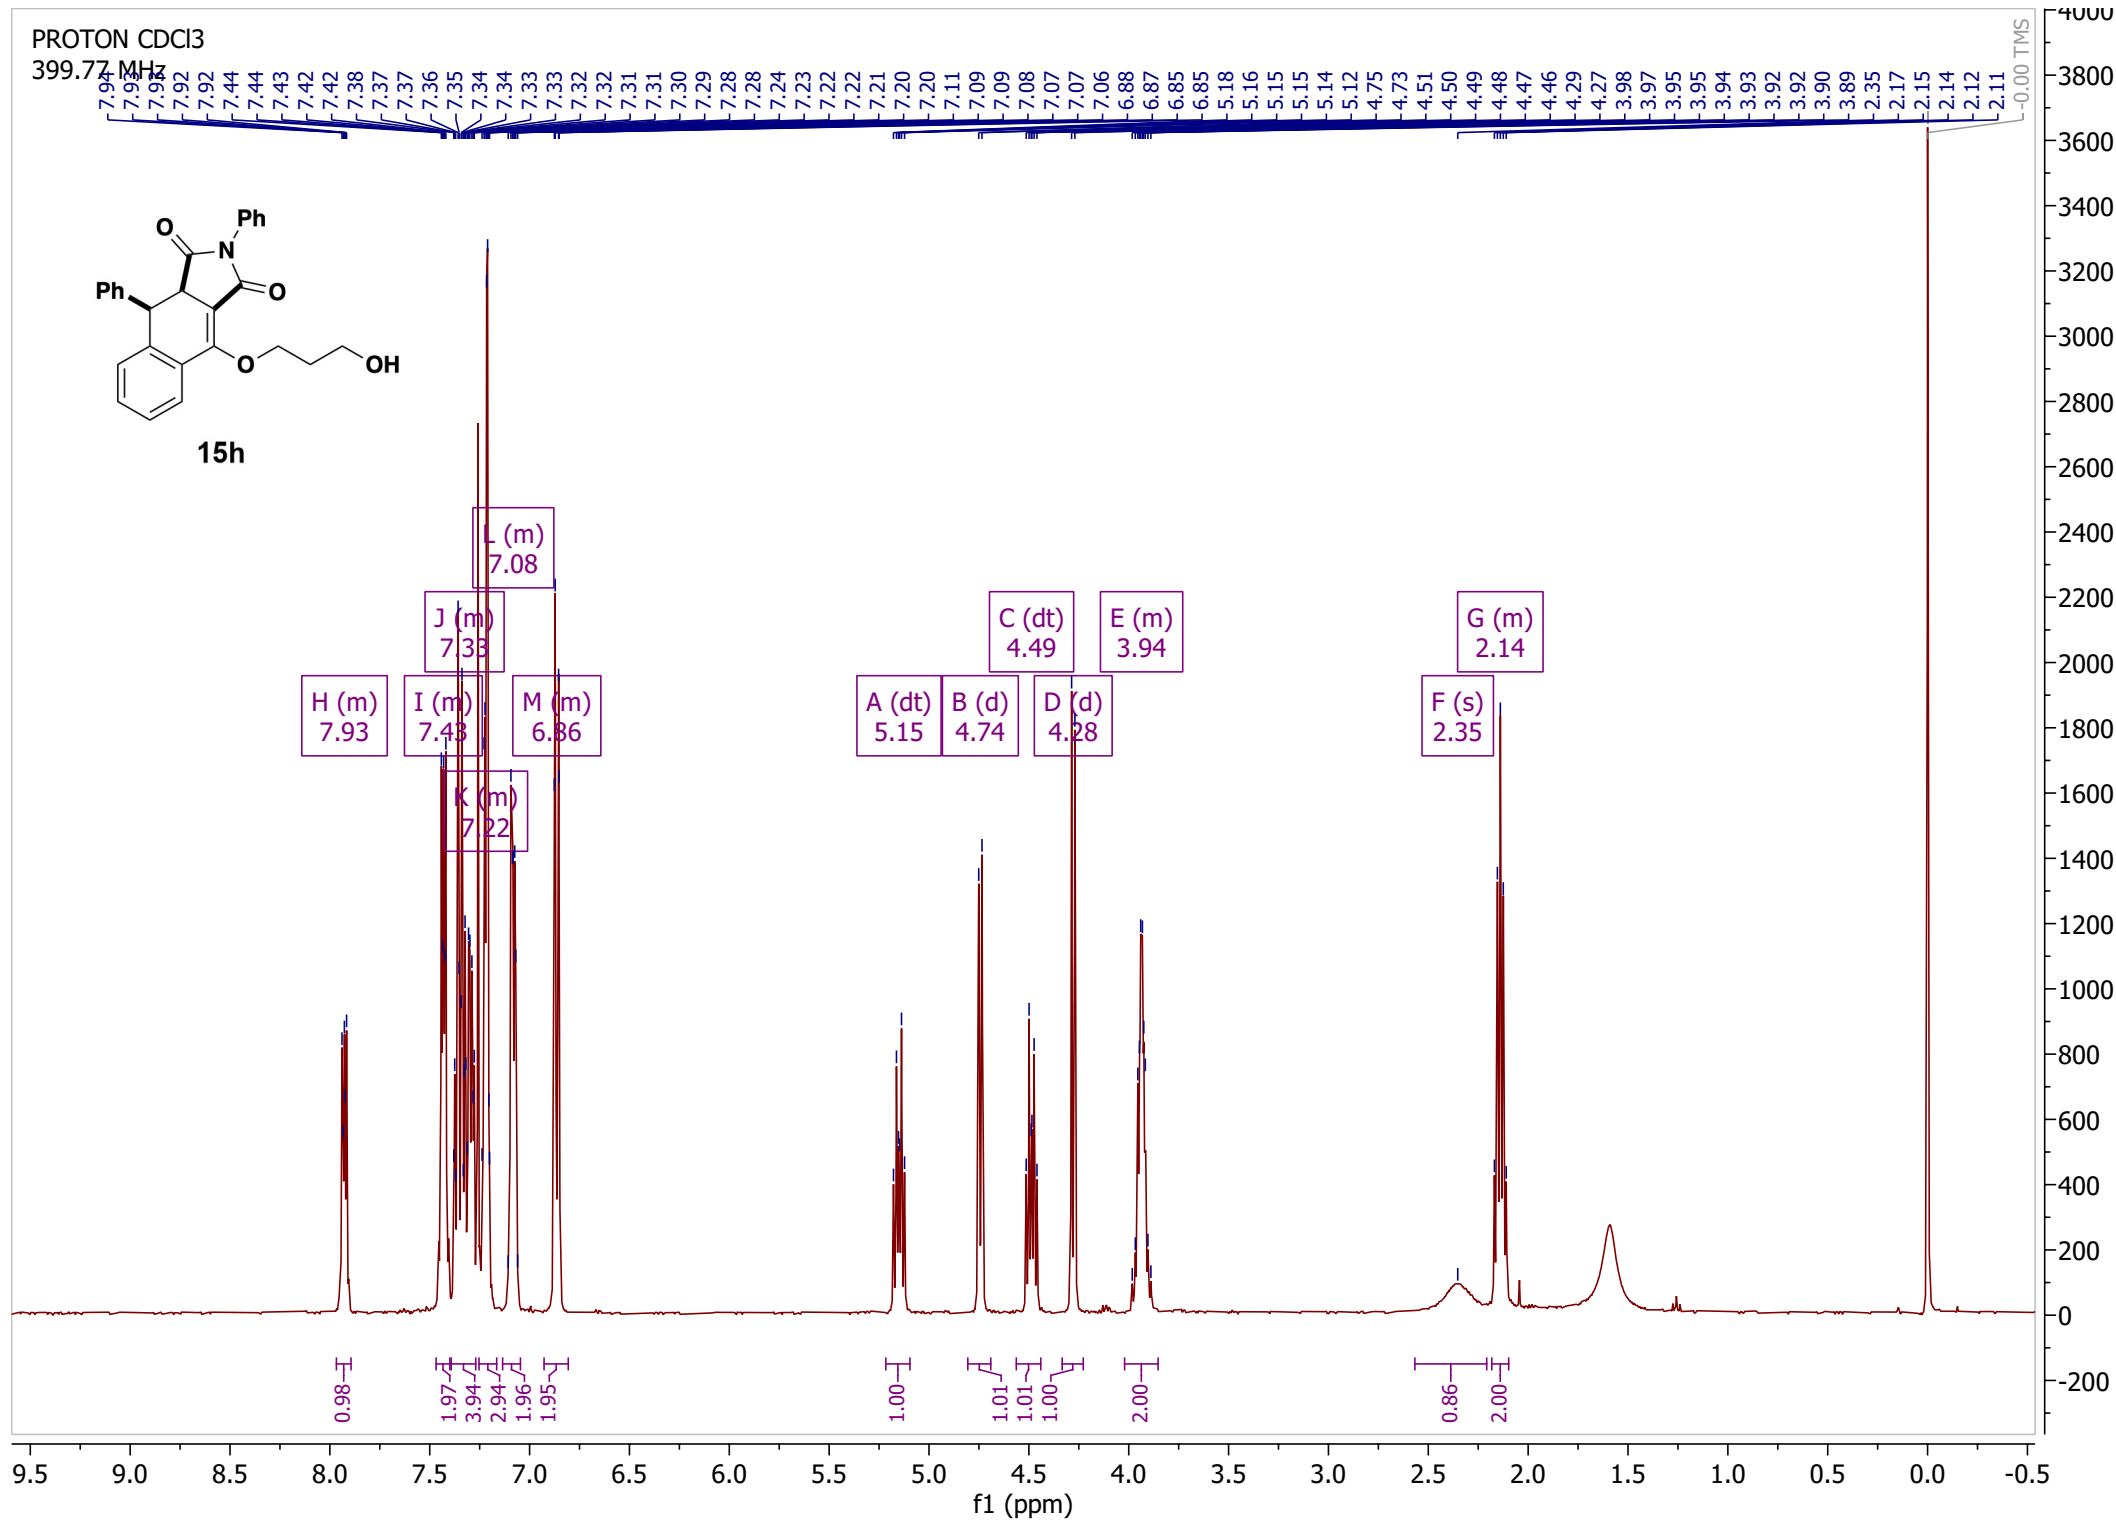

C13CPD CDCl3  
100.53 MHz

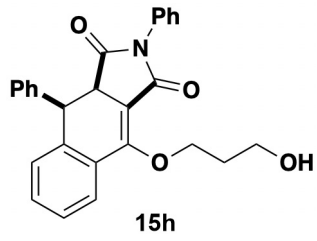

173.93  
165.64  
159.84  
140.83  
136.29  
132.29  
132.05  
131.75  
129.39  
129.22  
129.14  
128.63  
128.54  
128.28  
127.73  
126.89  
126.43

100.06

77.16  
77.06  
76.96

73.85

59.54

47.56

44.23

33.19

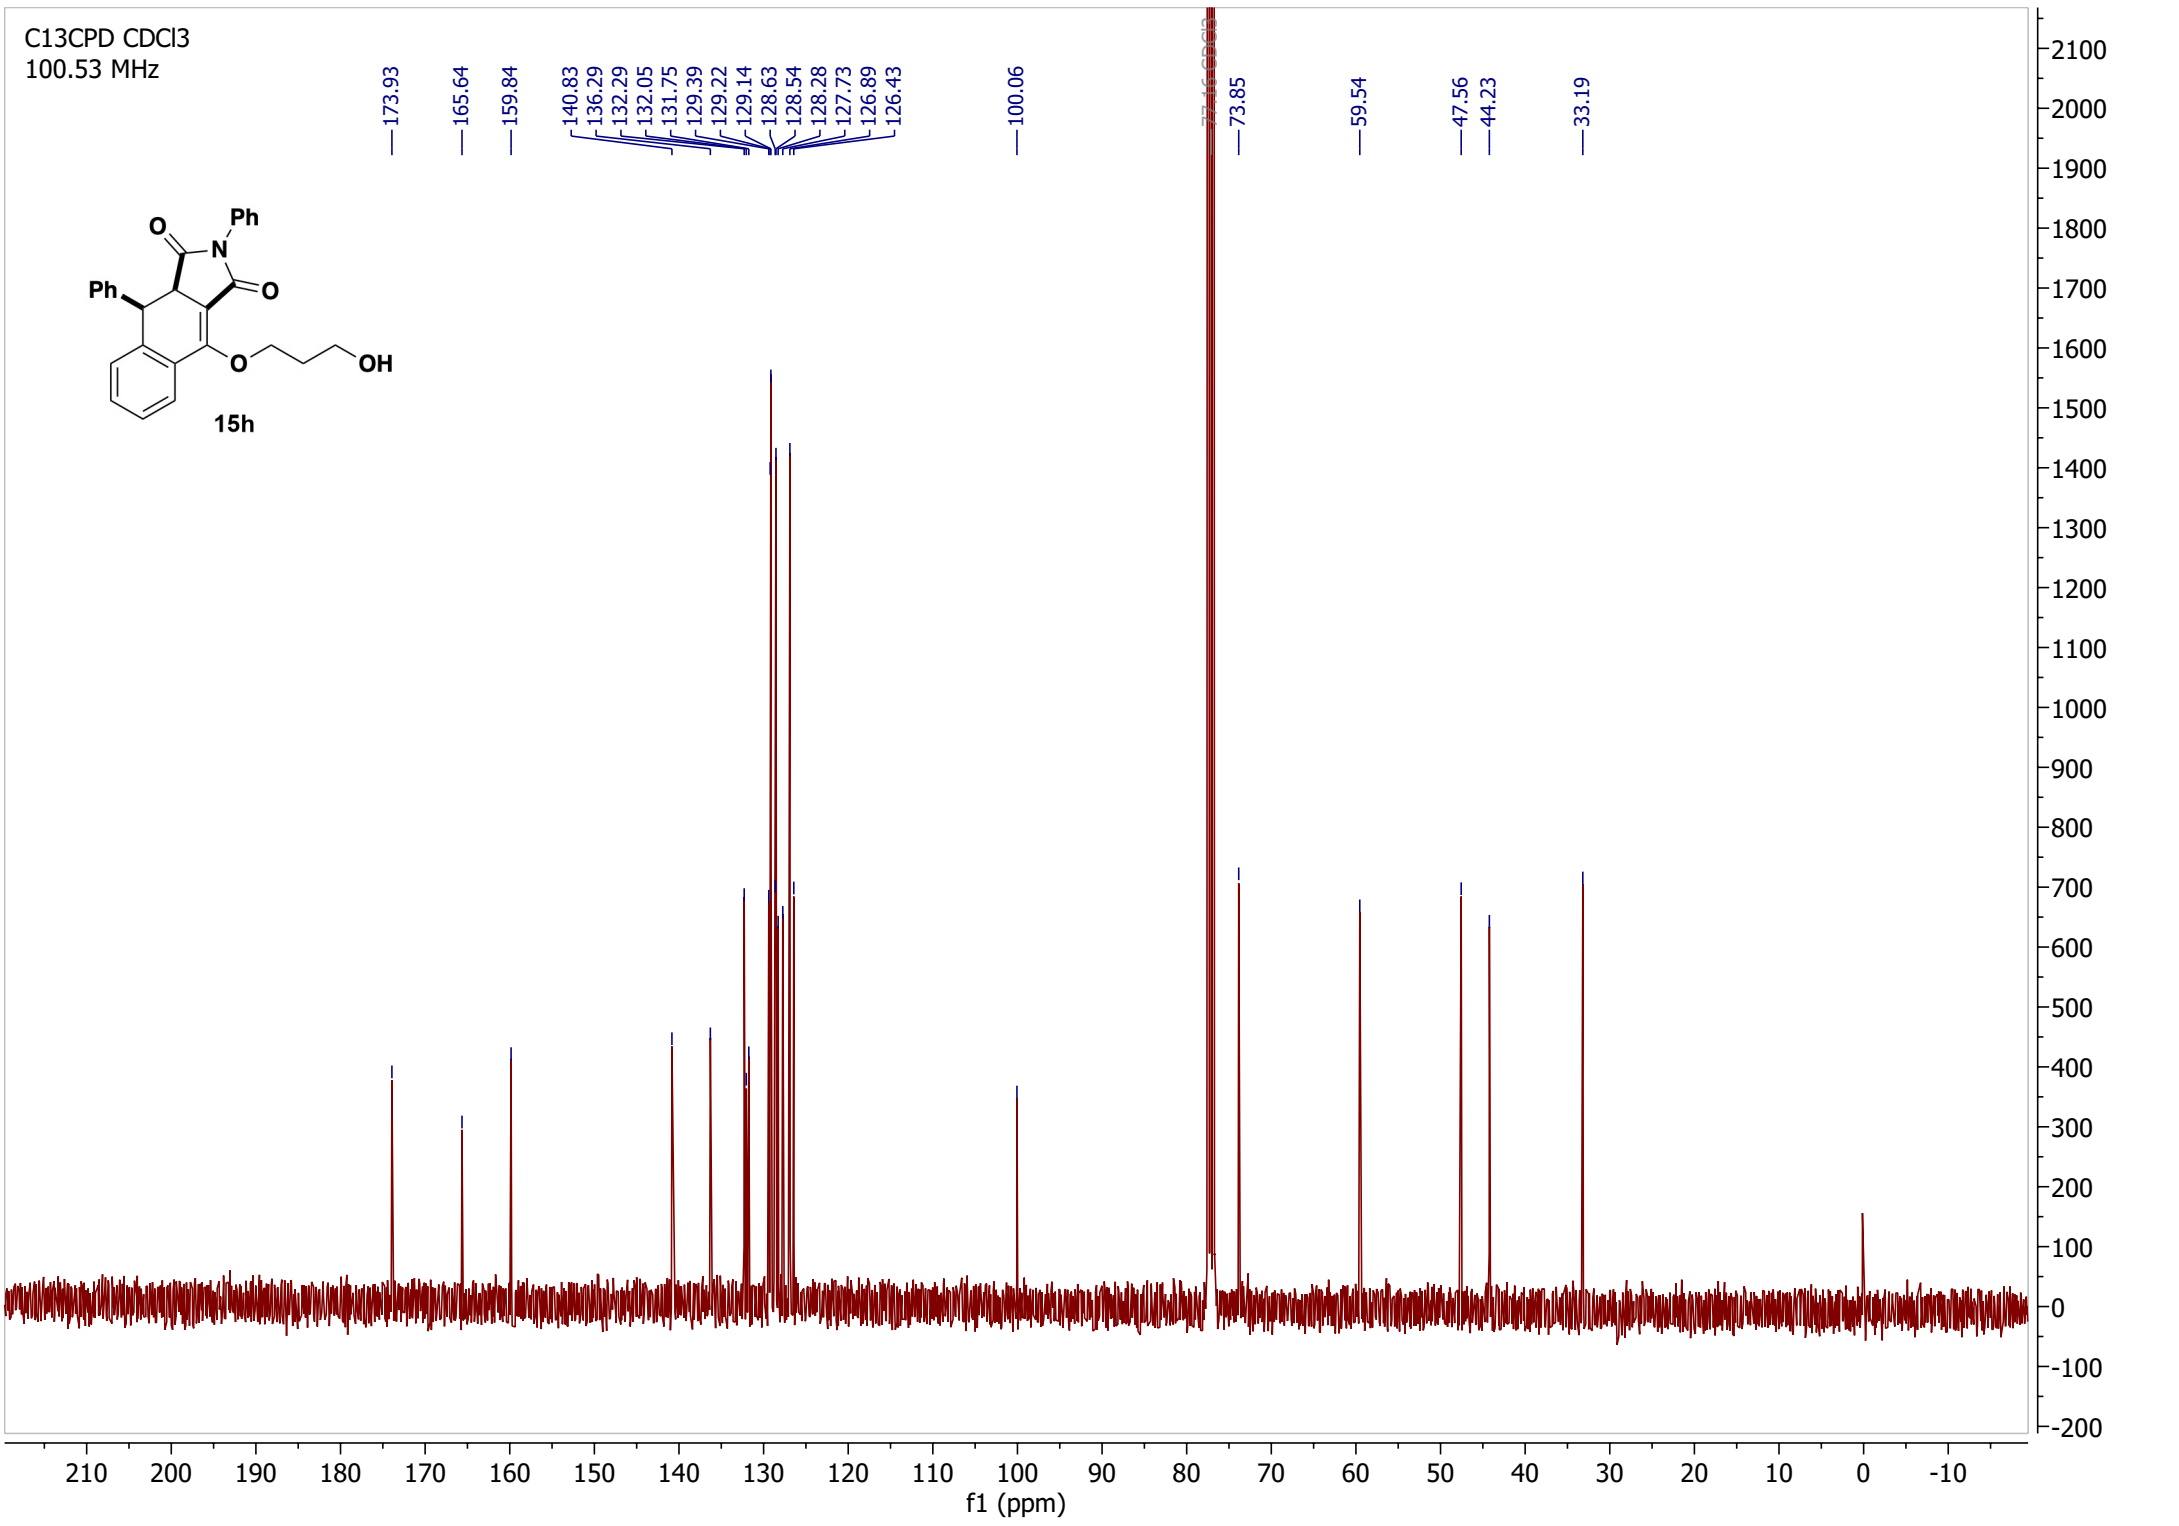



PROTON CDCl3

7.46 7.45 7.44 7.43 7.42 7.41 7.40 7.39 7.38 7.37 7.36 7.35 7.34 7.33 7.32 7.31 7.30 7.29 7.28 7.27 7.26 7.25 7.24 7.23 7.22 7.21 7.20 7.19 7.18 7.17 7.16 7.15 7.14 7.13 7.12 7.11 7.10 7.09 7.08 7.07 7.06 7.05 7.04 7.03 7.02 7.01 7.00 6.99 6.98 6.97 6.96 6.95 6.94 6.93 6.92 6.91 6.90 6.89 6.88 6.87 6.86 6.85 6.84 6.83 6.82 6.81 6.80 6.79 6.78 6.77 6.76 6.75 6.74 6.73 6.72 6.71 6.70 6.69 6.68 6.67 6.66 6.65 6.64 6.63 6.62 6.61 6.60 6.59 6.58 6.57 6.56 6.55 6.54 6.53 6.52 6.51 6.50 6.49 6.48 6.47 6.46 6.45 6.44 6.43 6.42 6.41 6.40 6.39 6.38 6.37 6.36 6.35 6.34 6.33 6.32 6.31 6.30 6.29 6.28 6.27 6.26 6.25 6.24 6.23 6.22 6.21 6.20 6.19 6.18 6.17 6.16 6.15 6.14 6.13 6.12 6.11 6.10 6.09 6.08 6.07 6.06 6.05 6.04 6.03 6.02 6.01 6.00 5.99 5.98 5.97 5.96 5.95 5.94 5.93 5.92 5.91 5.90 5.89 5.88 5.87 5.86 5.85 5.84 5.83 5.82 5.81 5.80 5.79 5.78 5.77 5.76 5.75 5.74 5.73 5.72 5.71 5.70 5.69 5.68 5.67 5.66 5.65 5.64 5.63 5.62 5.61 5.60 5.59 5.58 5.57 5.56 5.55 5.54 5.53 5.52 5.51 5.50 5.49 5.48 5.47 5.46 5.45 5.44 5.43 5.42 5.41 5.40 5.39 5.38 5.37 5.36 5.35 5.34 5.33 5.32 5.31 5.30 5.29 5.28 5.27 5.26 5.25 5.24 5.23 5.22 5.21 5.20 5.19 5.18 5.17 5.16 5.15 5.14 5.13 5.12 5.11 5.10 5.09 5.08 5.07 5.06 5.05 5.04 5.03 5.02 5.01 5.00 4.99 4.98 4.97 4.96 4.95 4.94 4.93 4.92 4.91 4.90 4.89 4.88 4.87 4.86 4.85 4.84 4.83 4.82 4.81 4.80 4.79 4.78 4.77 4.76 4.75 4.74 4.73 4.72 4.71 4.70 4.69 4.68 4.67 4.66 4.65 4.64 4.63 4.62 4.61 4.60 4.59 4.58 4.57 4.56 4.55 4.54 4.53 4.52 4.51 4.50 4.49 4.48 4.47 4.46 4.45 4.44 4.43 4.42 4.41 4.40 4.39 4.38 4.37 4.36 4.35 4.34 4.33 4.32 4.31 4.30 4.29 4.28 4.27 4.26 4.25 4.24 4.23 4.22 4.21 4.20 4.19 4.18 4.17 4.16 4.15 4.14 4.13 4.12 4.11 4.10 4.09 4.08 4.07 4.06 4.05 4.04 4.03 4.02 4.01 4.00 3.99 3.98 3.97 3.96 3.95 3.94 3.93 3.92 3.91 3.90 3.89 3.88 3.87 3.86 3.85 3.84 3.83 3.82 3.81 3.80 3.79 3.78 3.77 3.76 3.75 3.74 3.73 3.72 3.71 3.70 3.69 3.68 3.67 3.66 3.65 3.64 3.63 3.62 3.61 3.60 3.59 3.58 3.57 3.56 3.55 3.54 3.53 3.52 3.51 3.50 3.49 3.48 3.47 3.46 3.45 3.44 3.43 3.42 3.41 3.40 3.39 3.38 3.37 3.36 3.35 3.34 3.33 3.32 3.31 3.30 3.29 3.28 3.27 3.26 3.25 3.24 3.23 3.22 3.21 3.20 3.19 3.18 3.17 3.16 3.15 3.14 3.13 3.12 3.11 3.10 3.09 3.08 3.07 3.06 3.05 3.04 3.03 3.02 3.01 3.00 2.99 2.98 2.97 2.96 2.95 2.94 2.93 2.92 2.91 2.90 2.89 2.88 2.87 2.86 2.85 2.84 2.83 2.82 2.81 2.80 2.79 2.78 2.77 2.76 2.75 2.74 2.73 2.72 2.71 2.70 2.69 2.68 2.67 2.66 2.65 2.64 2.63 2.62 2.61 2.60 2.59 2.58 2.57 2.56 2.55 2.54 2.53 2.52 2.51 2.50 2.49 2.48 2.47 2.46 2.45 2.44 2.43 2.42 2.41 2.40 2.39 2.38 2.37 2.36 2.35 2.34 2.33 2.32 2.31 2.30 2.29 2.28 2.27 2.26 2.25 2.24 2.23 2.22 2.21 2.20 2.19 2.18 2.17 2.16 2.15 2.14 2.13 2.12 2.11 2.10 2.09 2.08 2.07 2.06 2.05 2.04 2.03 2.02 2.01 2.00 1.99 1.98 1.97 1.96 1.95 1.94 1.93 1.92 1.91 1.90 1.89 1.88 1.87 1.86 1.85 1.84 1.83 1.82 1.81 1.80 1.79 1.78 1.77 1.76 1.75 1.74 1.73 1.72 1.71 1.70 1.69 1.68 1.67 1.66 1.65 1.64 1.63 1.62 1.61 1.60 1.59 1.58 1.57 1.56 1.55 1.54 1.53 1.52 1.51 1.50 1.49 1.48 1.47 1.46 1.45 1.44 1.43 1.42 1.41 1.40 1.39 1.38 1.37 1.36 1.35 1.34 1.33 1.32 1.31 1.30 1.29 1.28 1.27 1.26 1.25 1.24 1.23 1.22 1.21 1.20 1.19 1.18 1.17 1.16 1.15 1.14 1.13 1.12 1.11 1.10 1.09 1.08 1.07 1.06 1.05 1.04 1.03 1.02 1.01 1.00 0.99 0.98 0.97 0.96 0.95 0.94 0.93 0.92 0.91 0.90 0.89 0.88 0.87 0.86 0.85 0.84 0.83 0.82 0.81 0.80 0.79 0.78 0.77 0.76 0.75 0.74 0.73 0.72 0.71 0.70 0.69 0.68 0.67 0.66 0.65 0.64 0.63 0.62 0.61 0.60 0.59 0.58 0.57 0.56 0.55 0.54 0.53 0.52 0.51 0.50 0.49 0.48 0.47 0.46 0.45 0.44 0.43 0.42 0.41 0.40 0.39 0.38 0.37 0.36 0.35 0.34 0.33 0.32 0.31 0.30 0.29 0.28 0.27 0.26 0.25 0.24 0.23 0.22 0.21 0.20 0.19 0.18 0.17 0.16 0.15 0.14 0.13 0.12 0.11 0.10 0.09 0.08 0.07 0.06 0.05 0.04 0.03 0.02 0.01 0.00 TMS

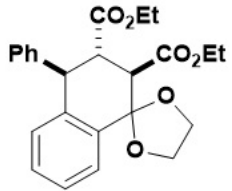

15i

J (m)  
7.23

I (dd)  
7.45

H (dt)  
6.75

E (m)  
4.16

B (t)  
3.73

D (m)  
4.37

C (qt)  
3.91

A (d)  
3.52

F (t)  
1.28

G (t)  
0.92

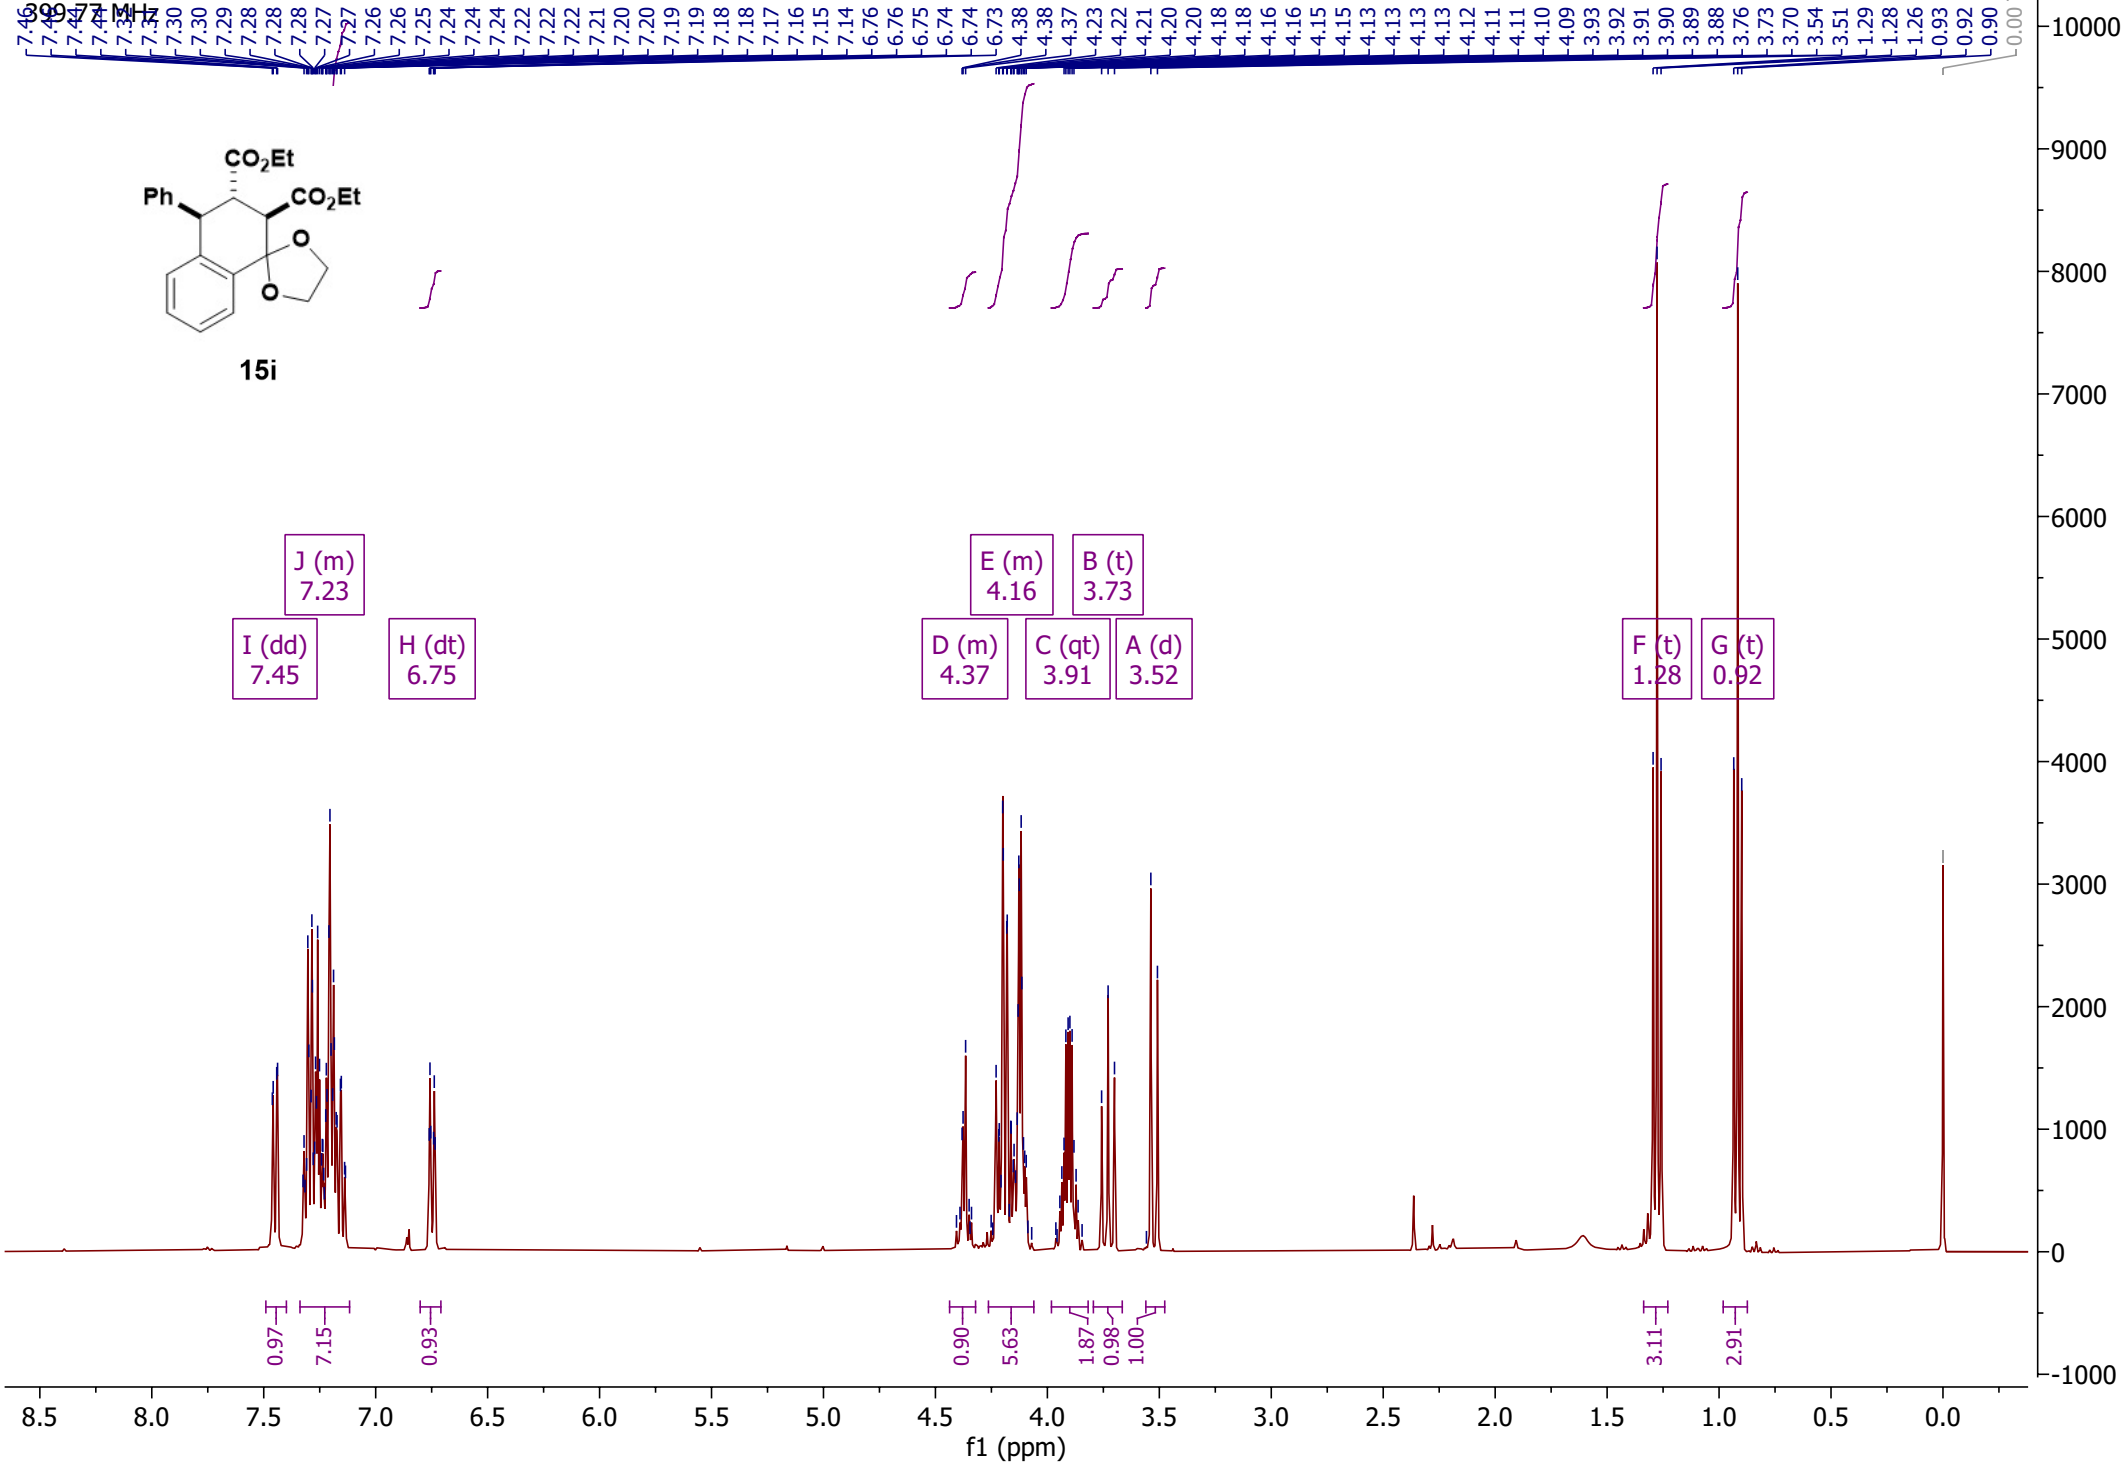

C13CPD CDCl3  
100.53 MHz

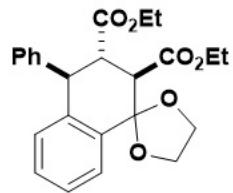

15i

173.62  
170.84

143.13  
138.93  
137.73  
129.51  
129.46  
129.03  
128.62  
127.16  
126.67  
124.52

107.68

77.16 CDCl3

67.19  
65.13  
61.23  
60.63

52.46  
49.97  
48.97

14.28  
13.90

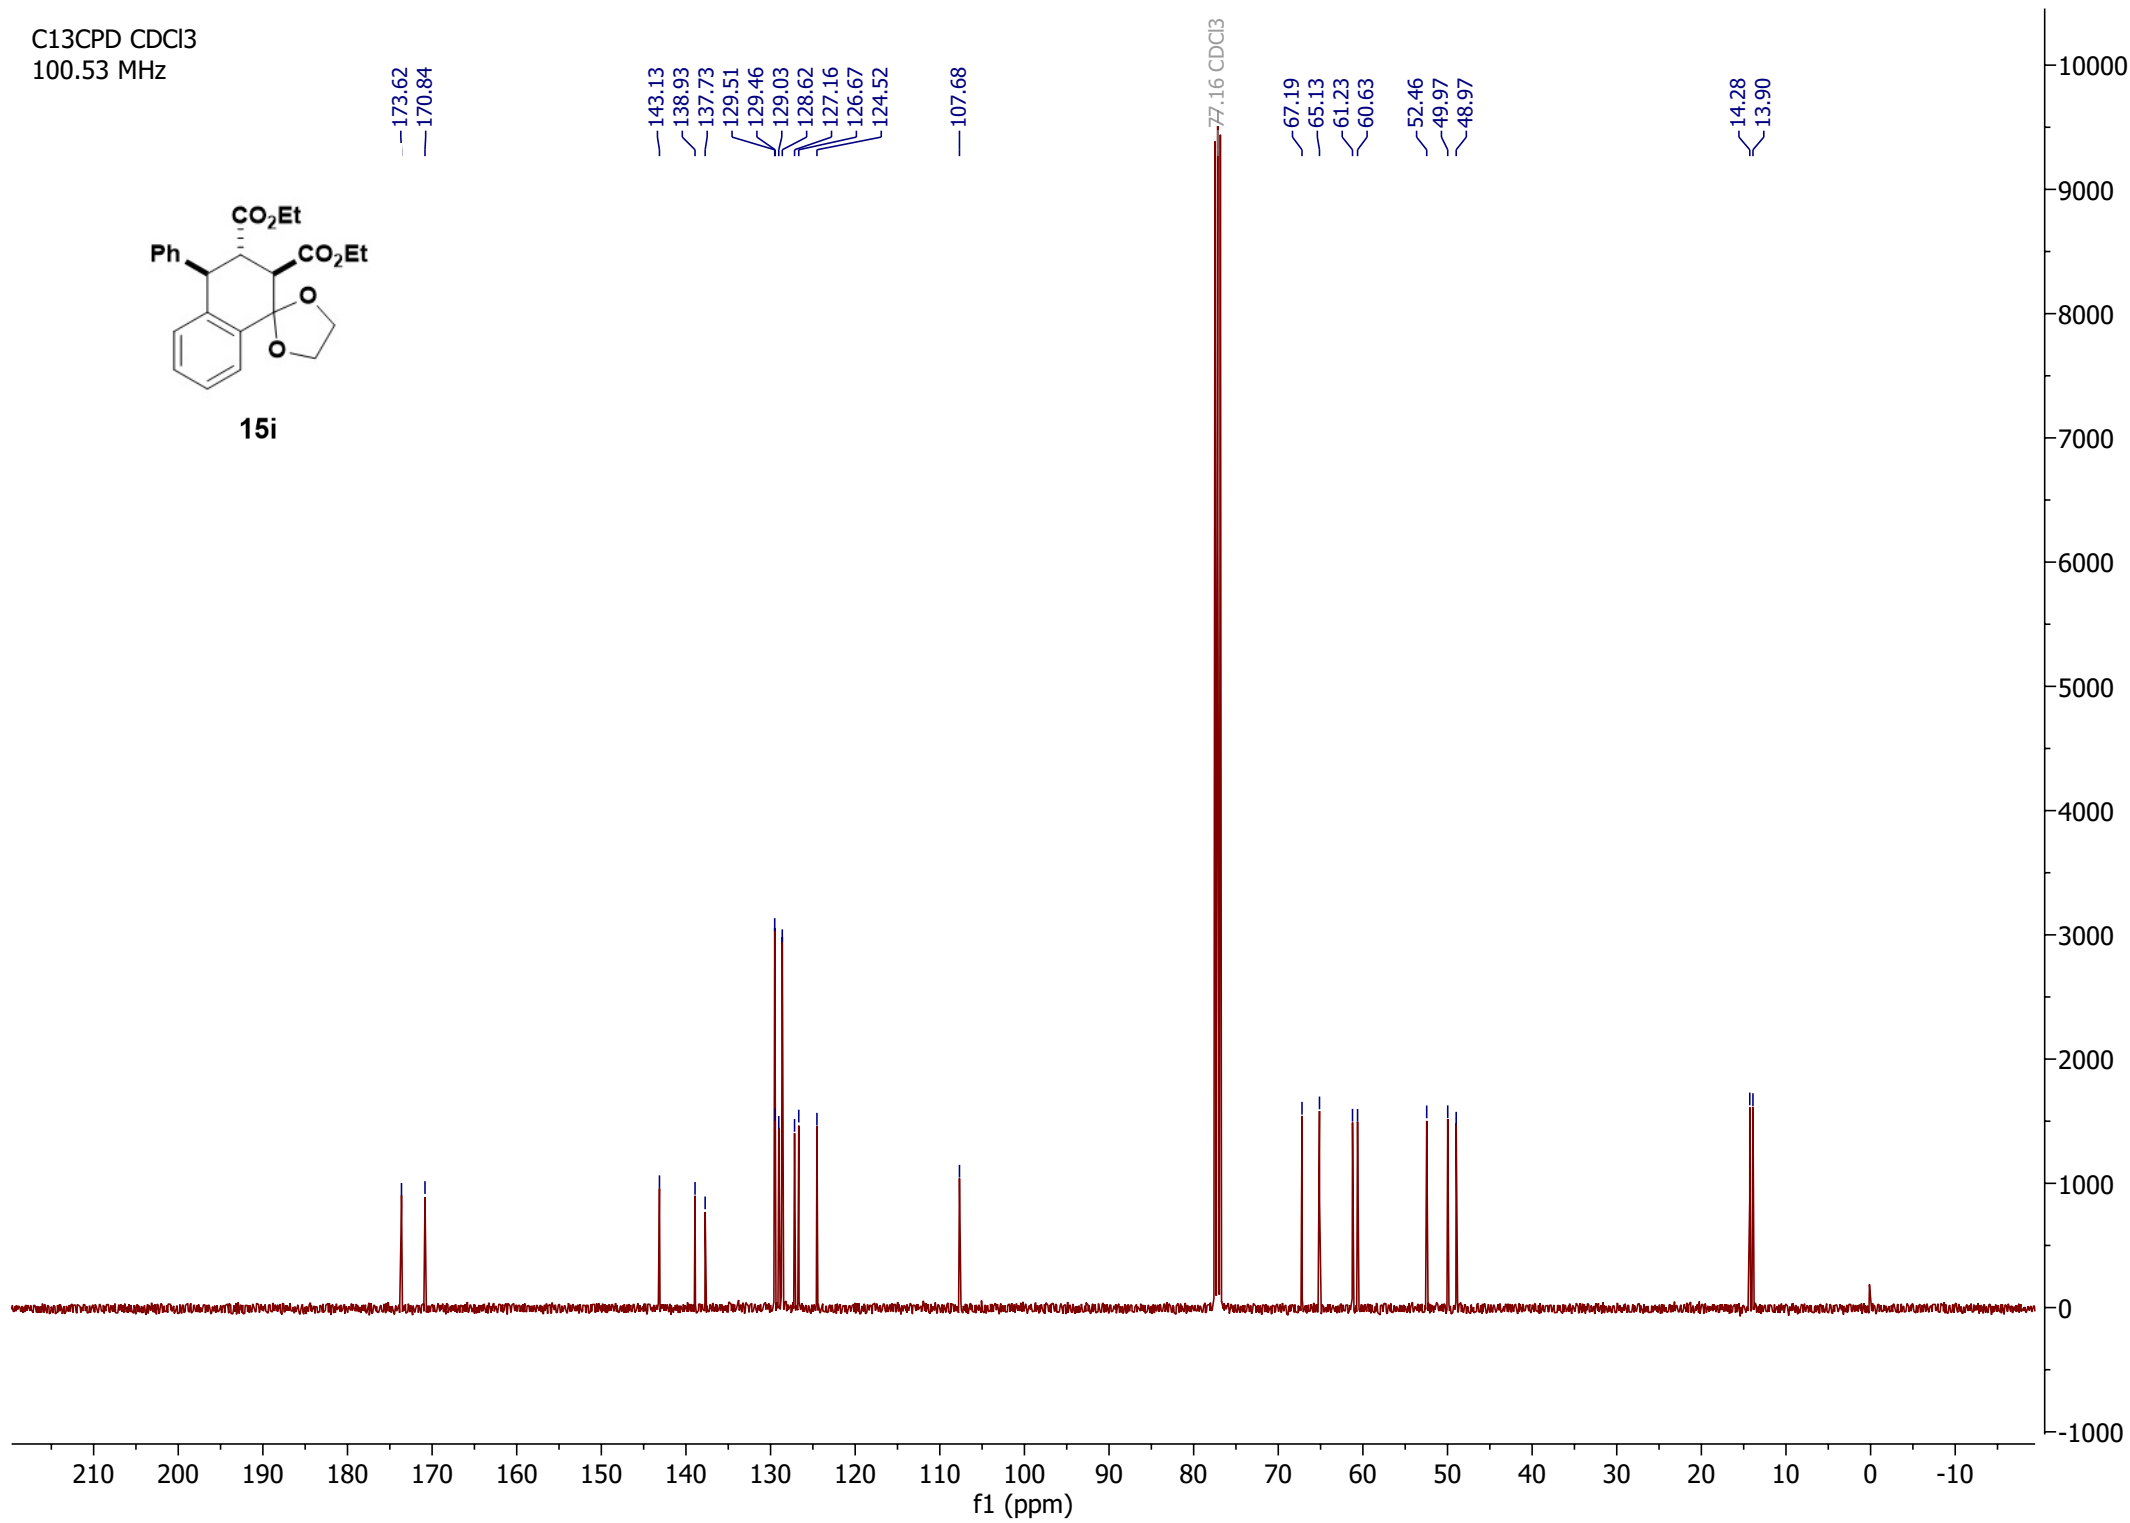

PROTON CDCl3

300.77 MHz

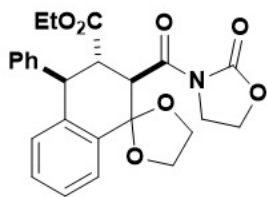

15k

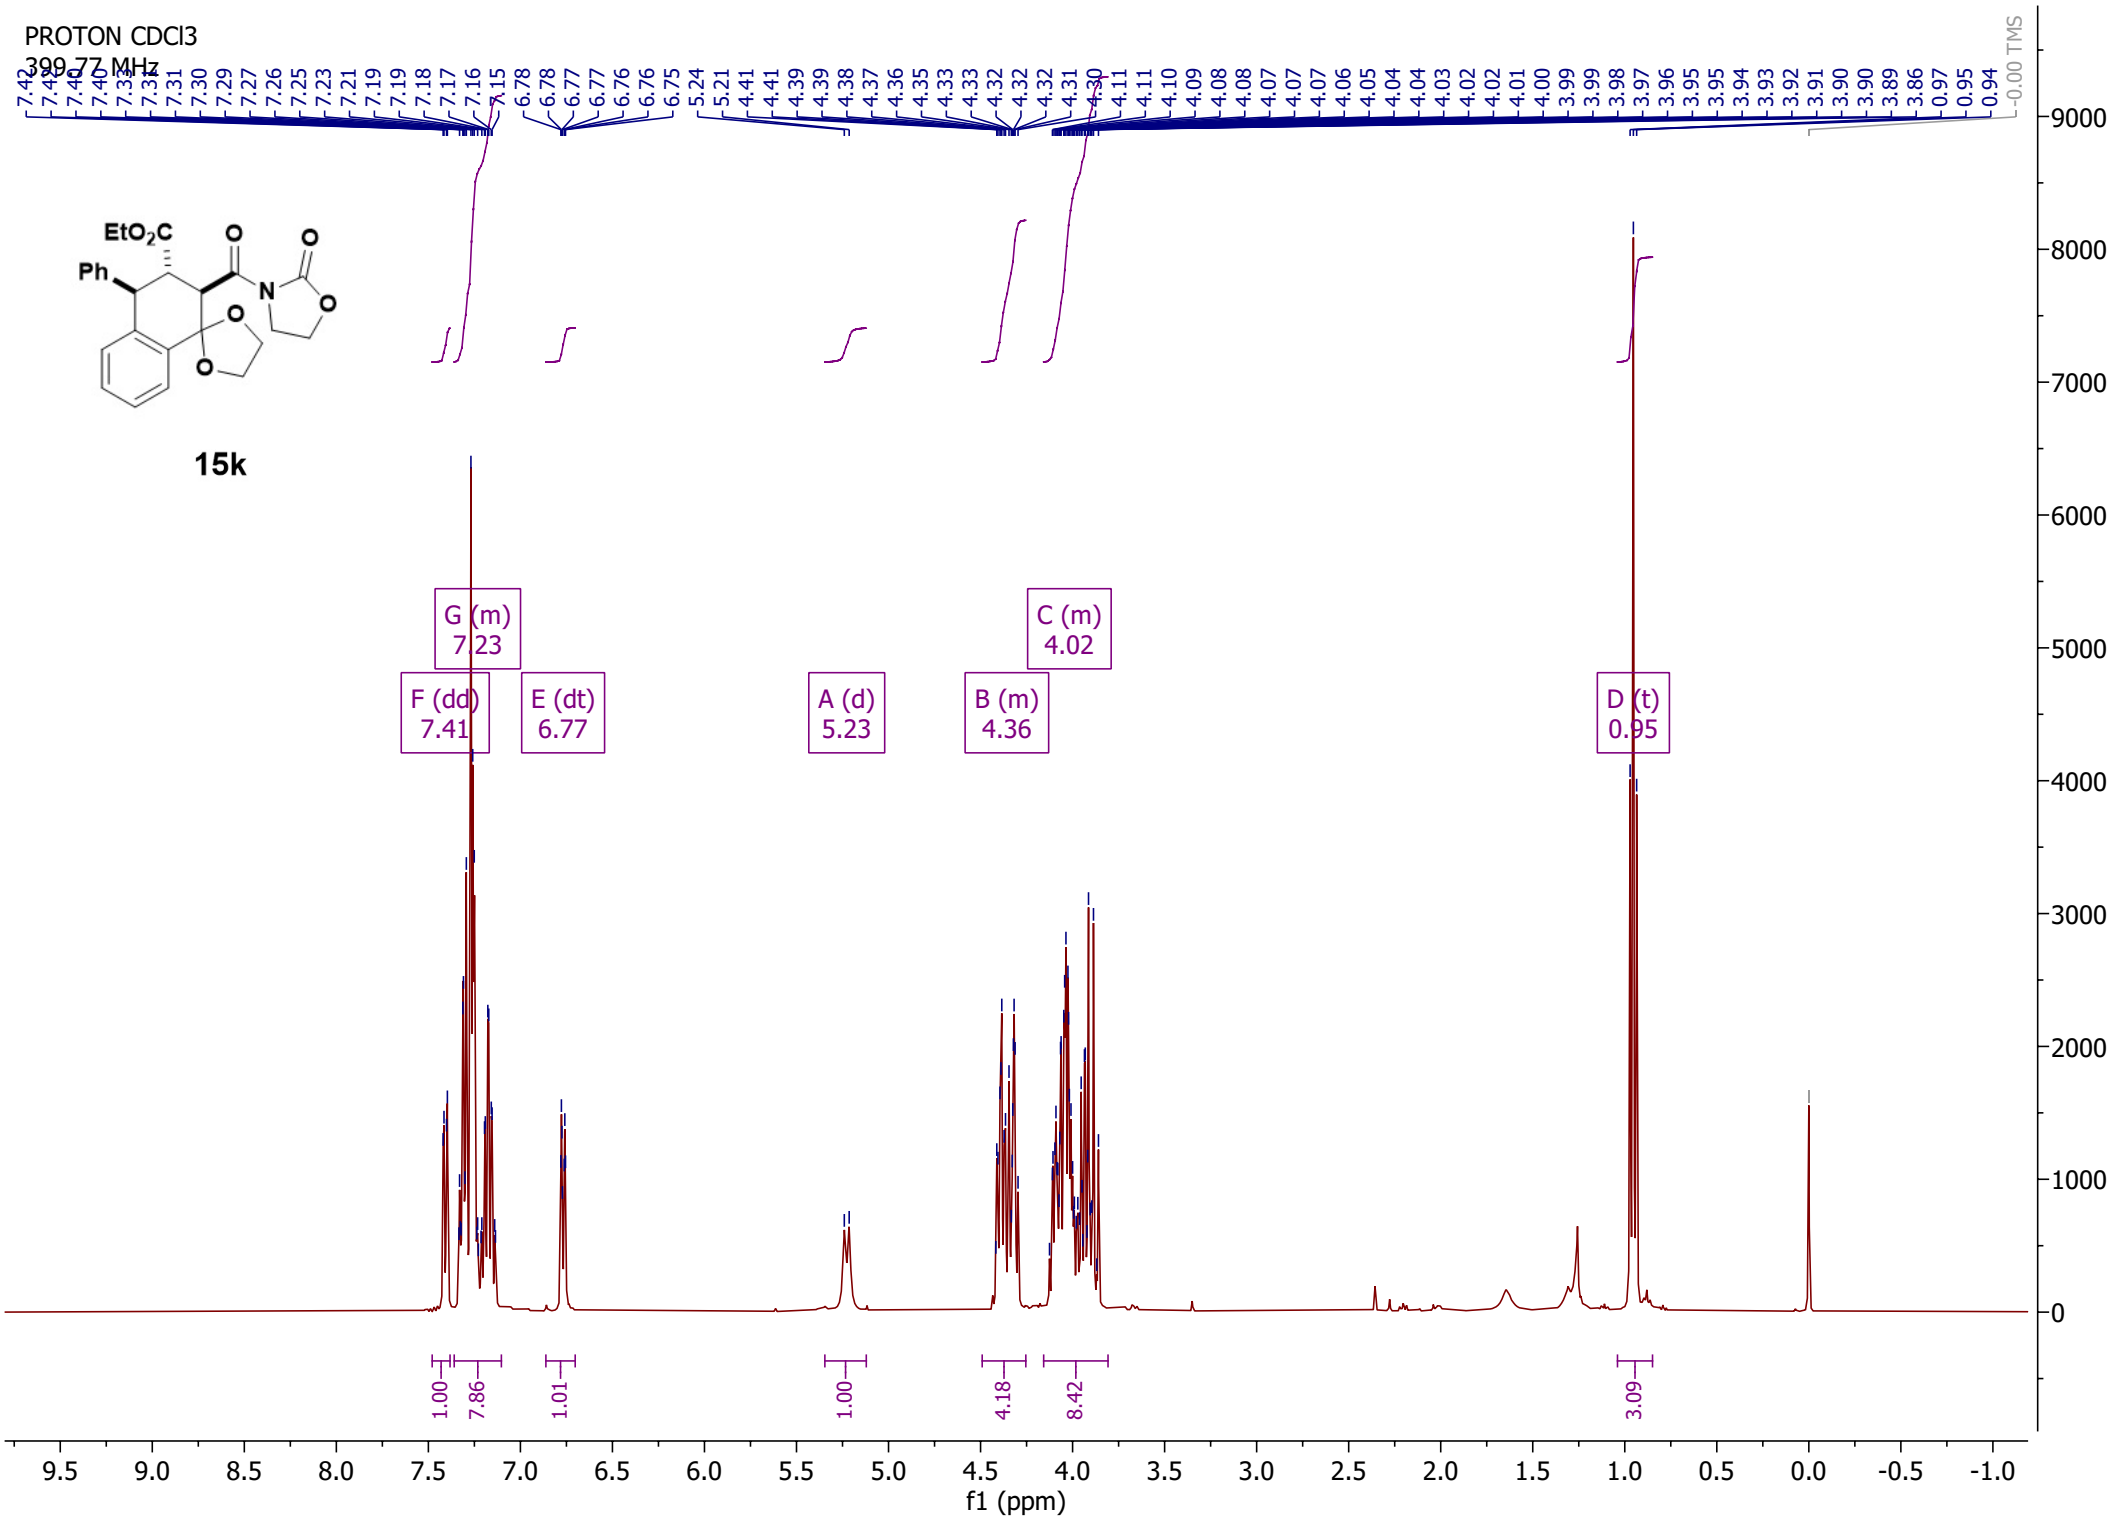

C13CPD CDCl3  
100.53 MHz

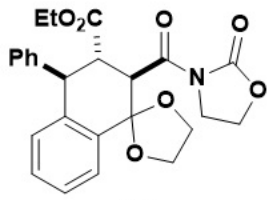

173.60  
171.67

153.19

143.37

139.25

137.27

129.56

129.44

129.01

128.55

127.02

126.38

123.55

107.90

77.16 CDCl3

67.18

64.90

61.67

60.77

49.64

48.40

48.10

43.29

13.91

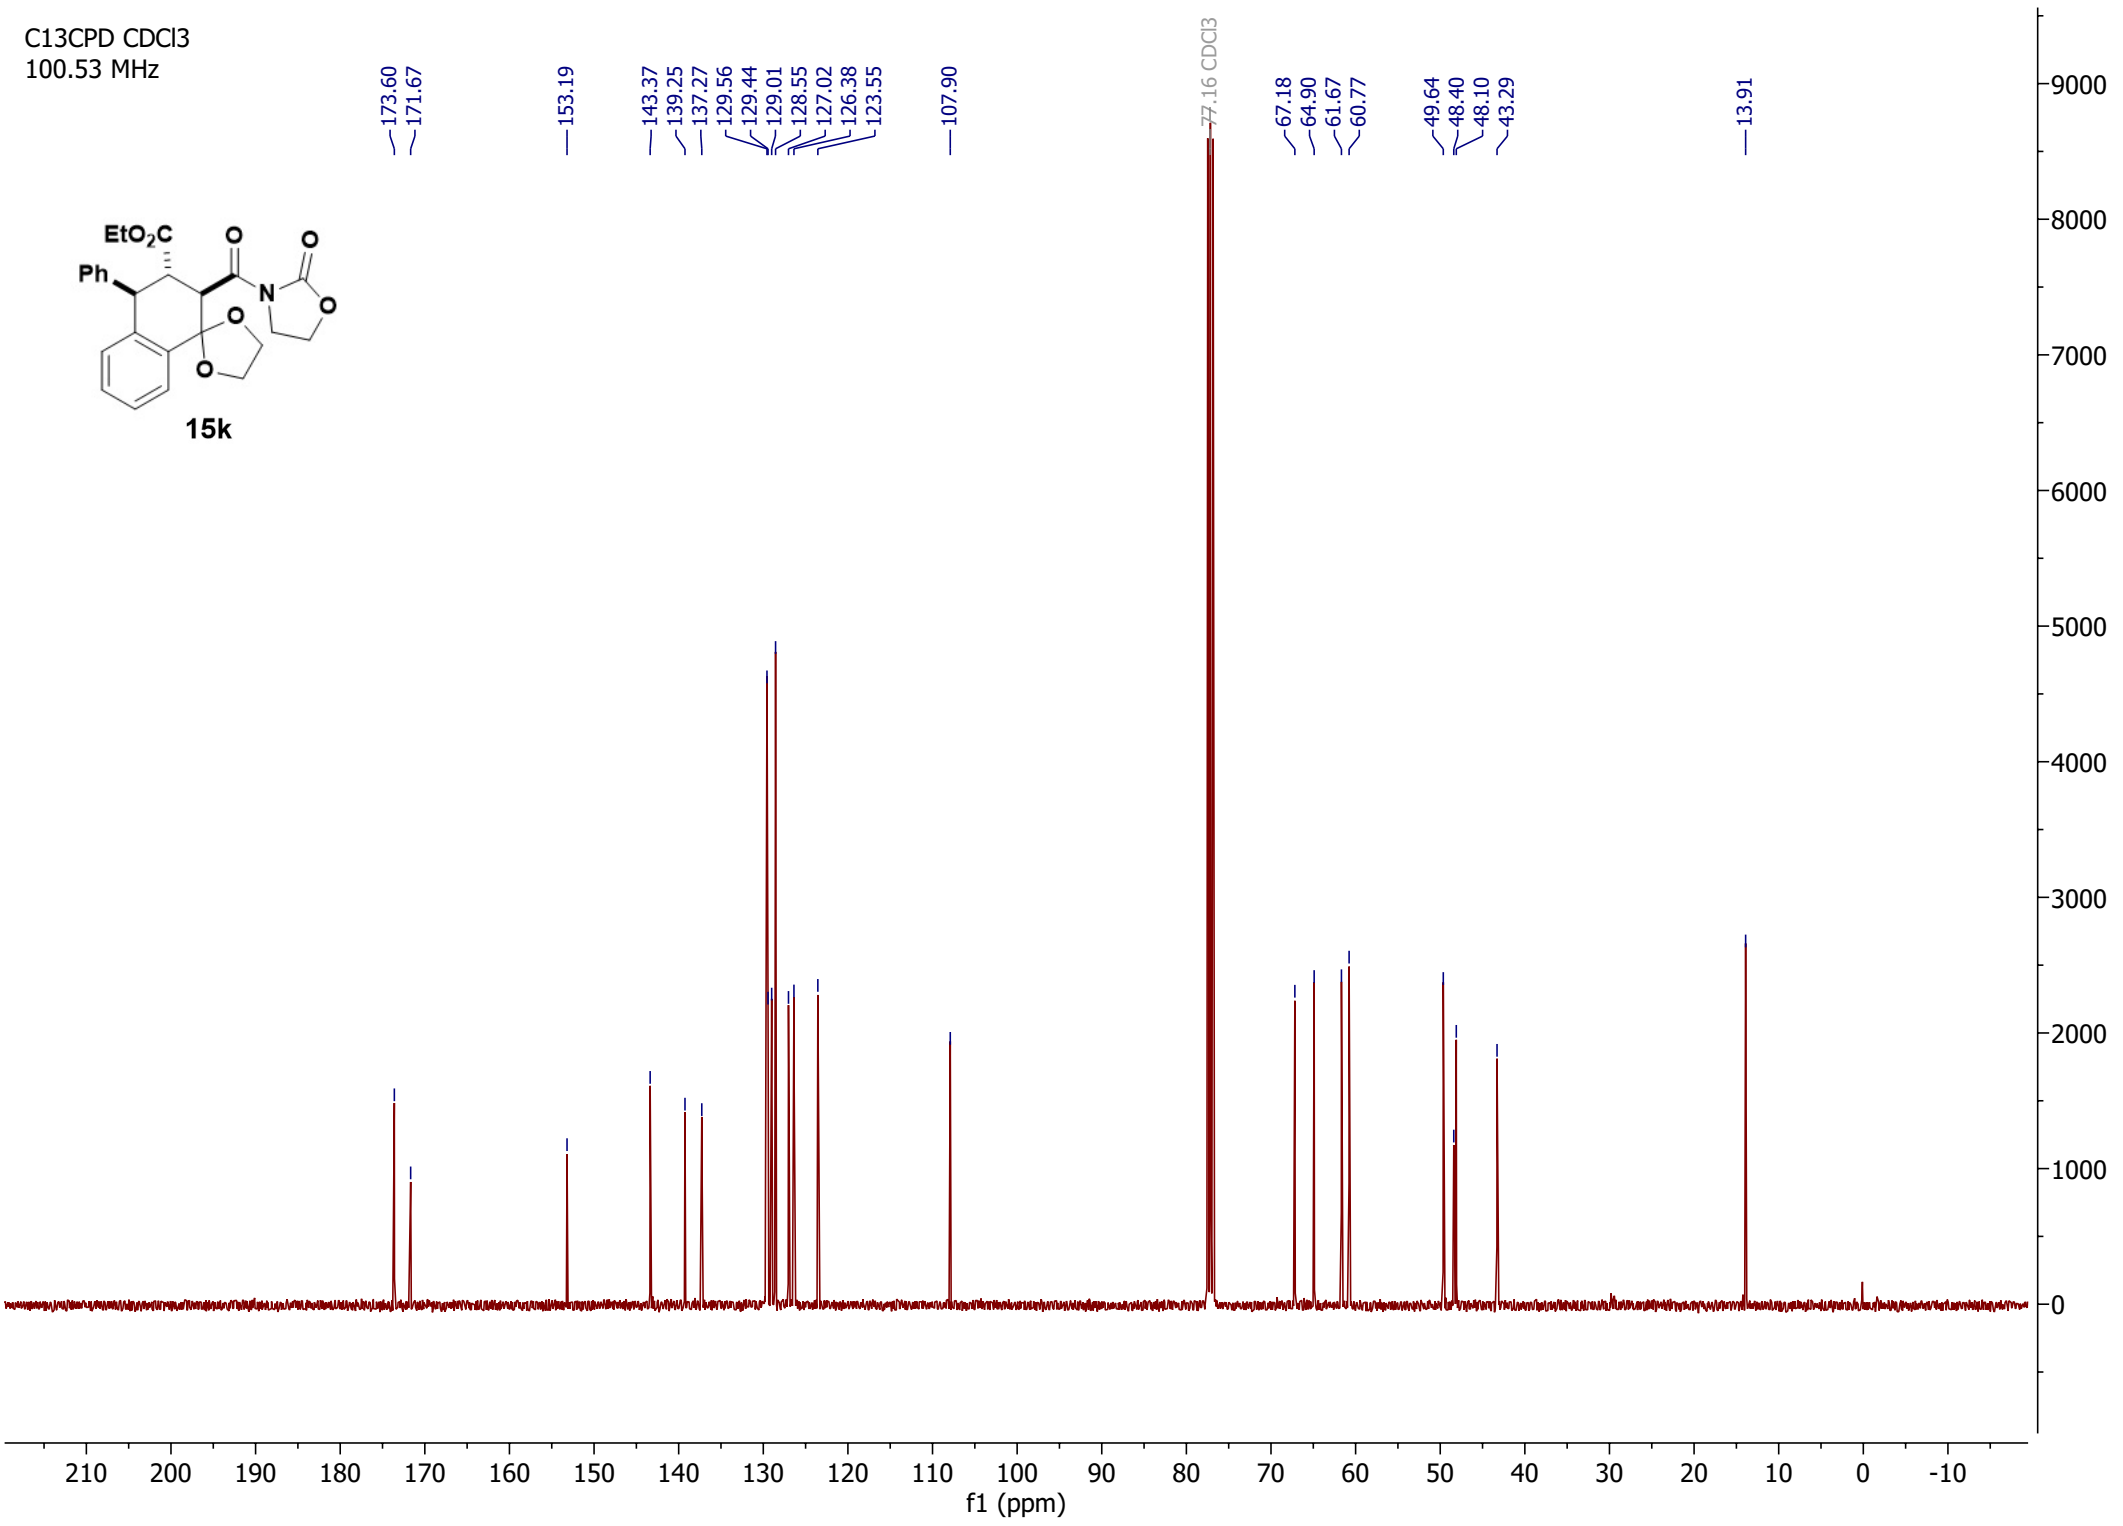

PROTON CDCl3

300.77 MHz

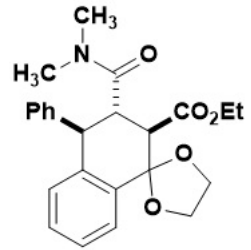

15l

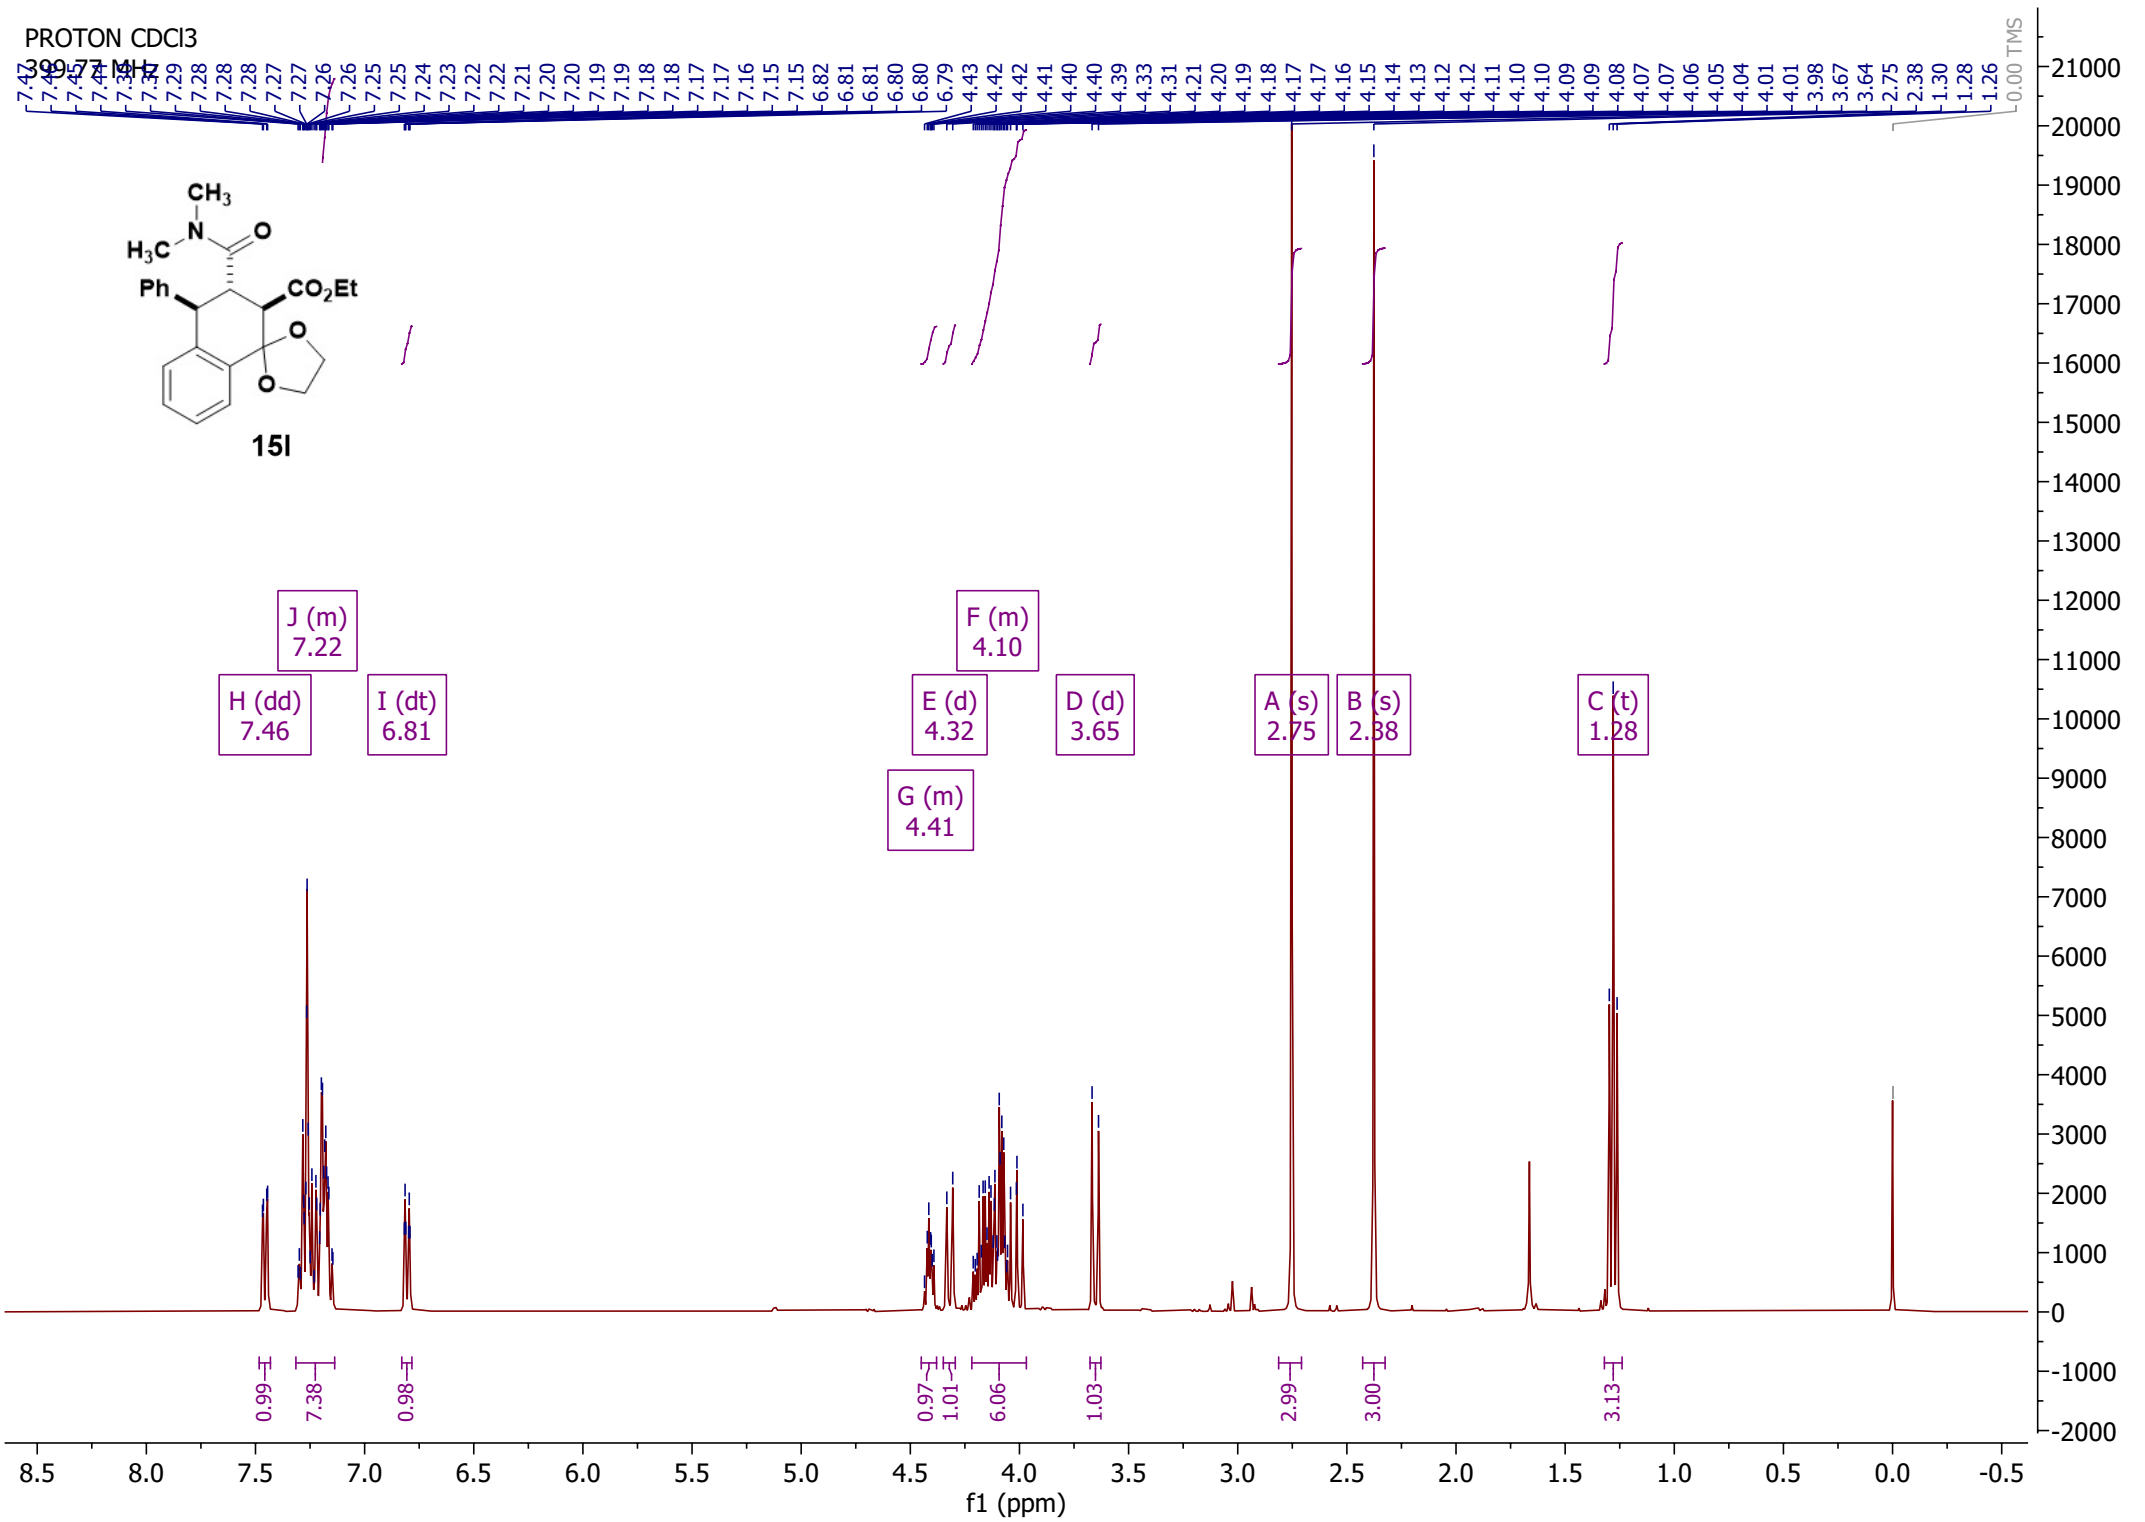

C13CPD CDCl3  
100.53 MHz

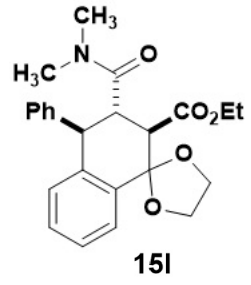

173.20  
171.40

144.26  
139.18  
138.13  
129.83  
129.50  
128.97  
128.56  
127.11  
126.45  
124.48

108.06

77.46 CDCl3

67.32  
64.80  
61.18

52.59  
49.42  
45.99

36.95  
35.67

14.29

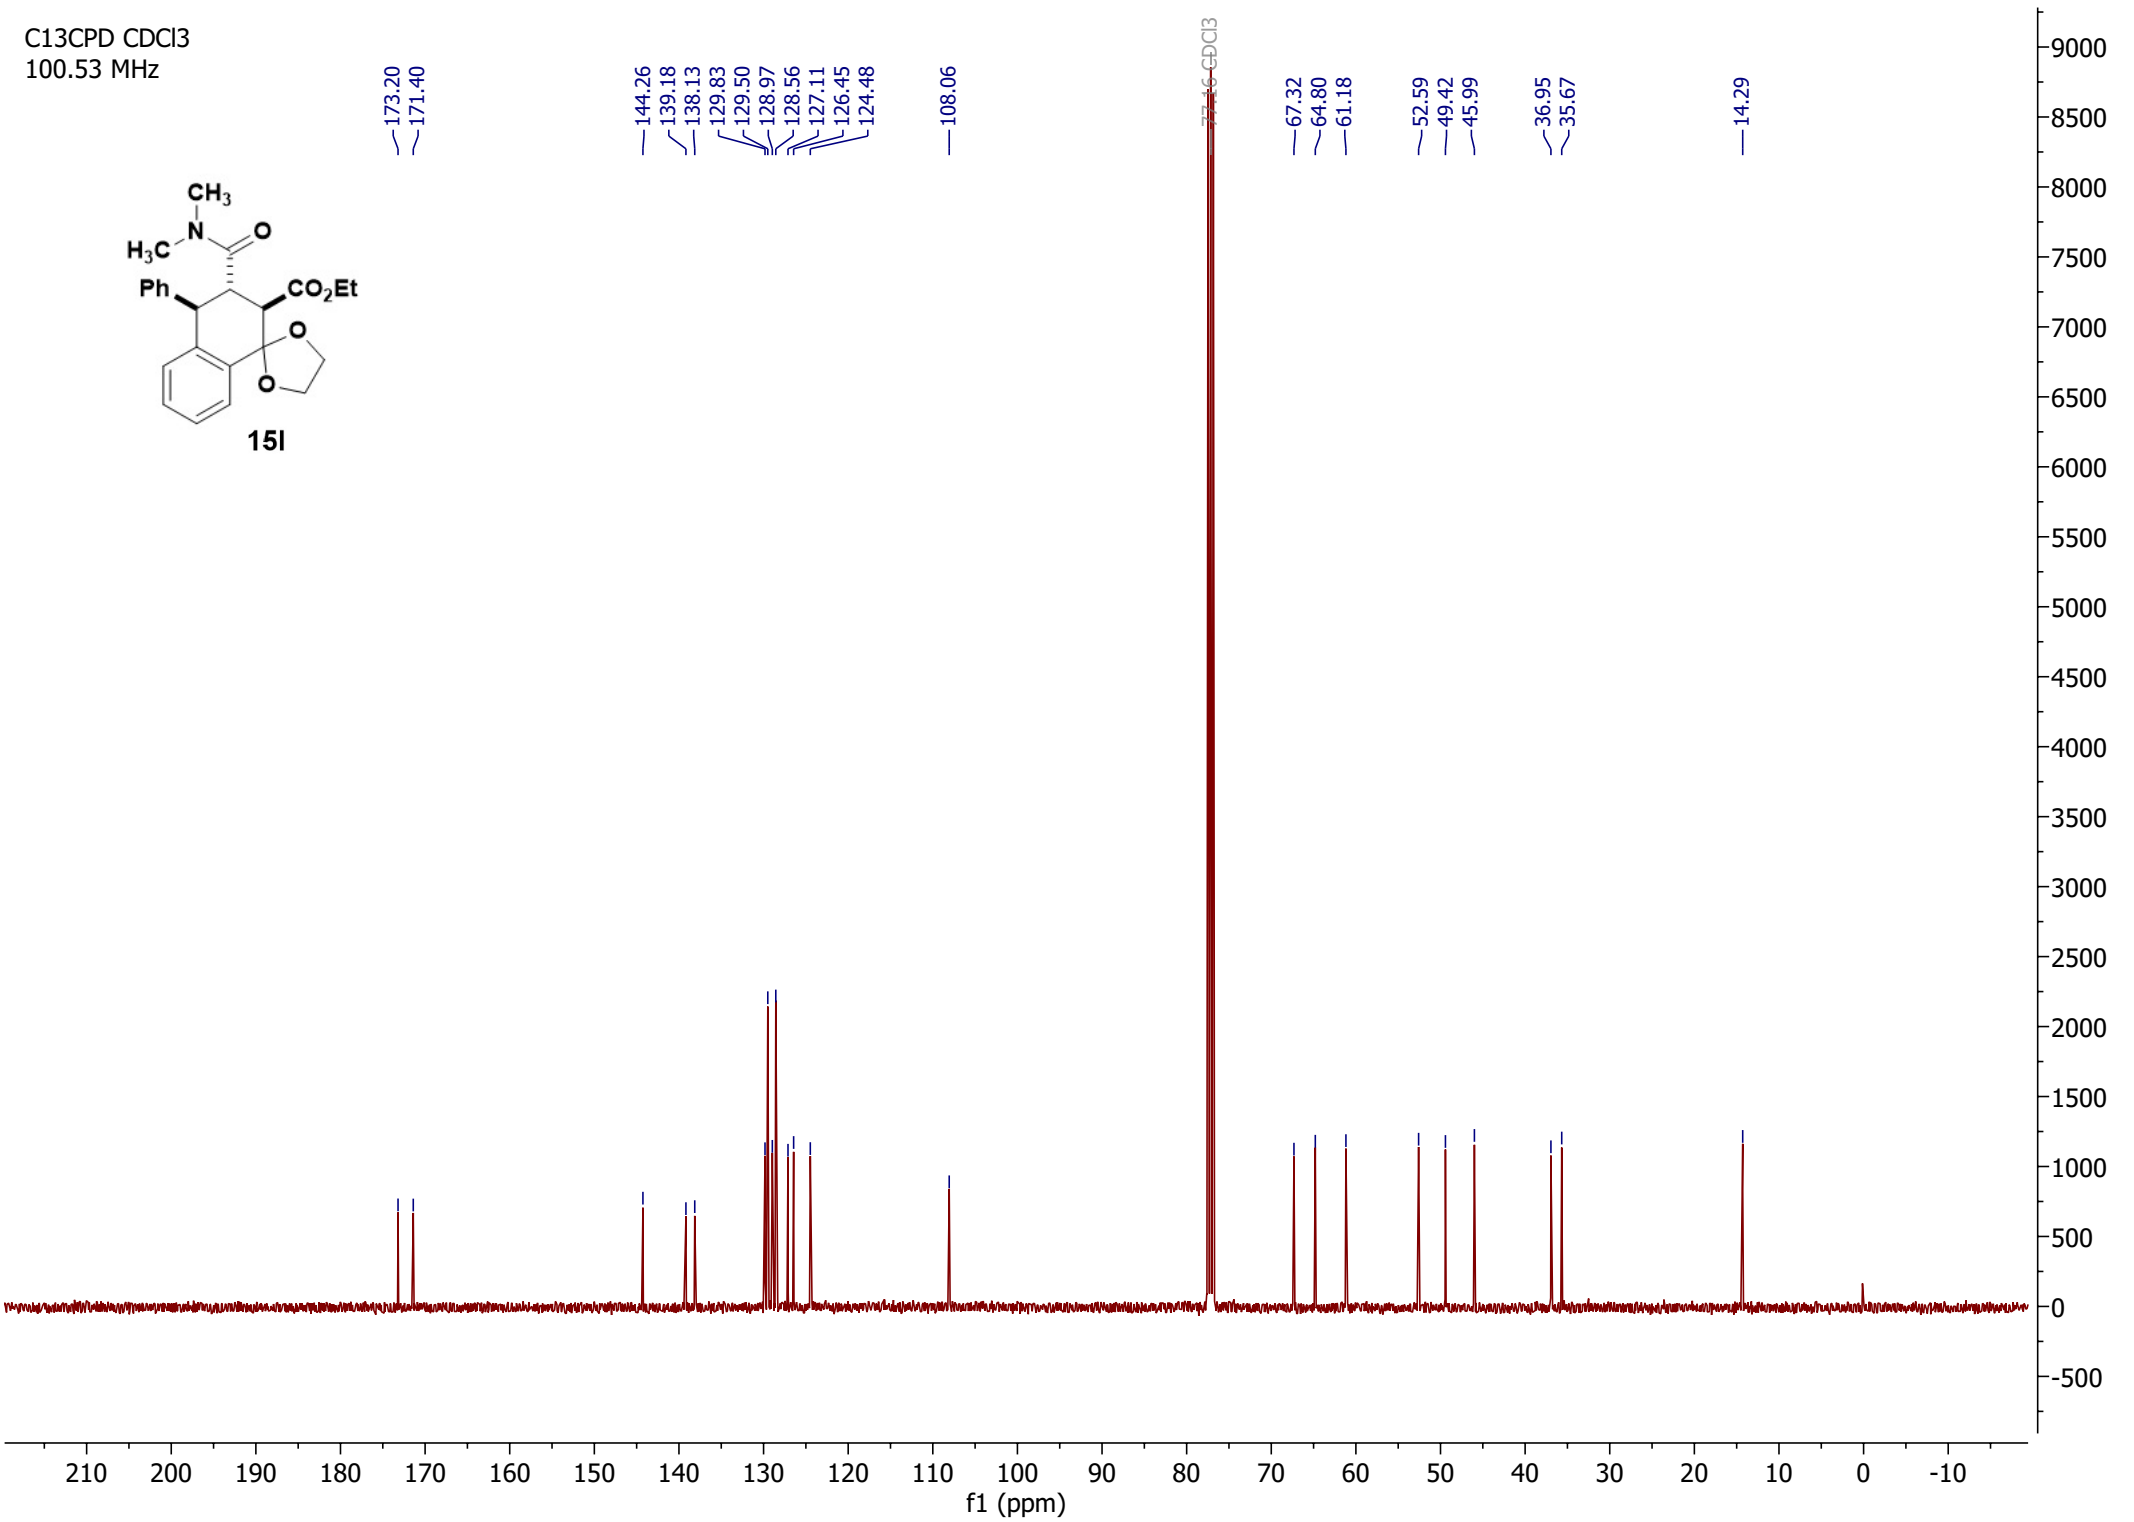

PROTON CDCl3

7.49 7.47 7.45 7.44 7.38 7.37 7.36 7.35 7.33 7.32 7.30 7.28 7.26 7.25 7.24 7.23 7.22 6.81 6.79 4.63 4.61 4.60 4.58 4.56 4.54 4.54 4.53 4.52 4.51 4.49 4.48 4.47 4.47 4.46 4.46 4.45 4.44 4.31 4.28 4.24 4.24 4.22 4.22 4.20 4.20 4.18 3.82 3.79 3.76 3.59 3.56

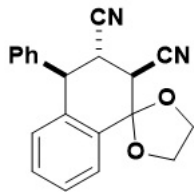

15m

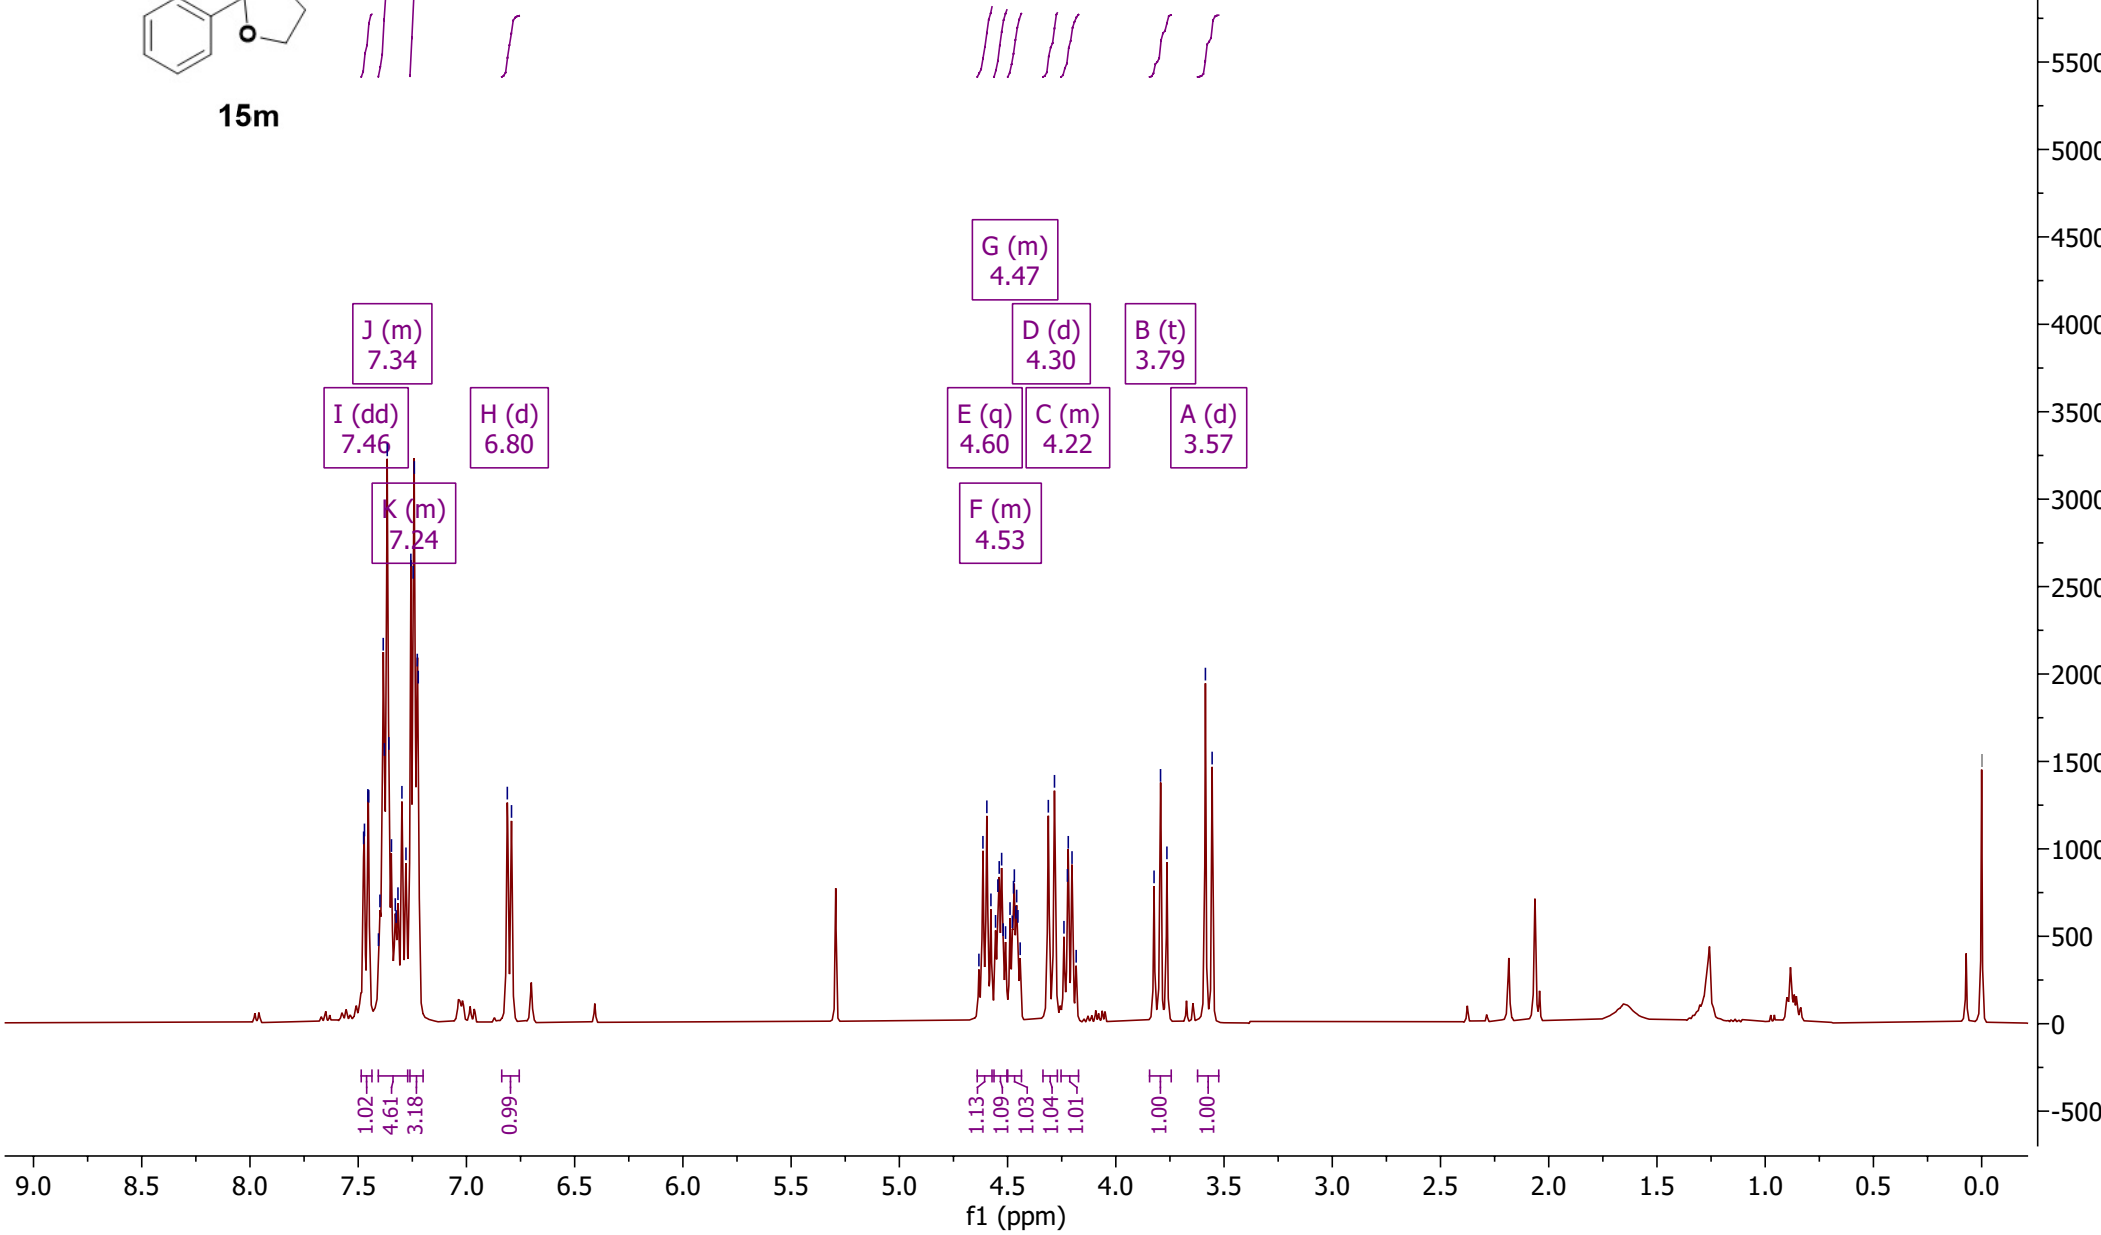

0.00 TMS

C13CPD CDCl3  
100.53 MHz

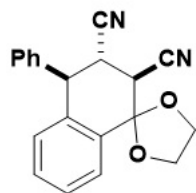

15m

-141.03  
-136.20  
-135.54  
-130.09  
-129.93  
129.41  
129.17  
128.48  
127.73  
124.77  
117.78  
116.38

105.45

77.00

68.68

66.03

48.55

41.55

37.66

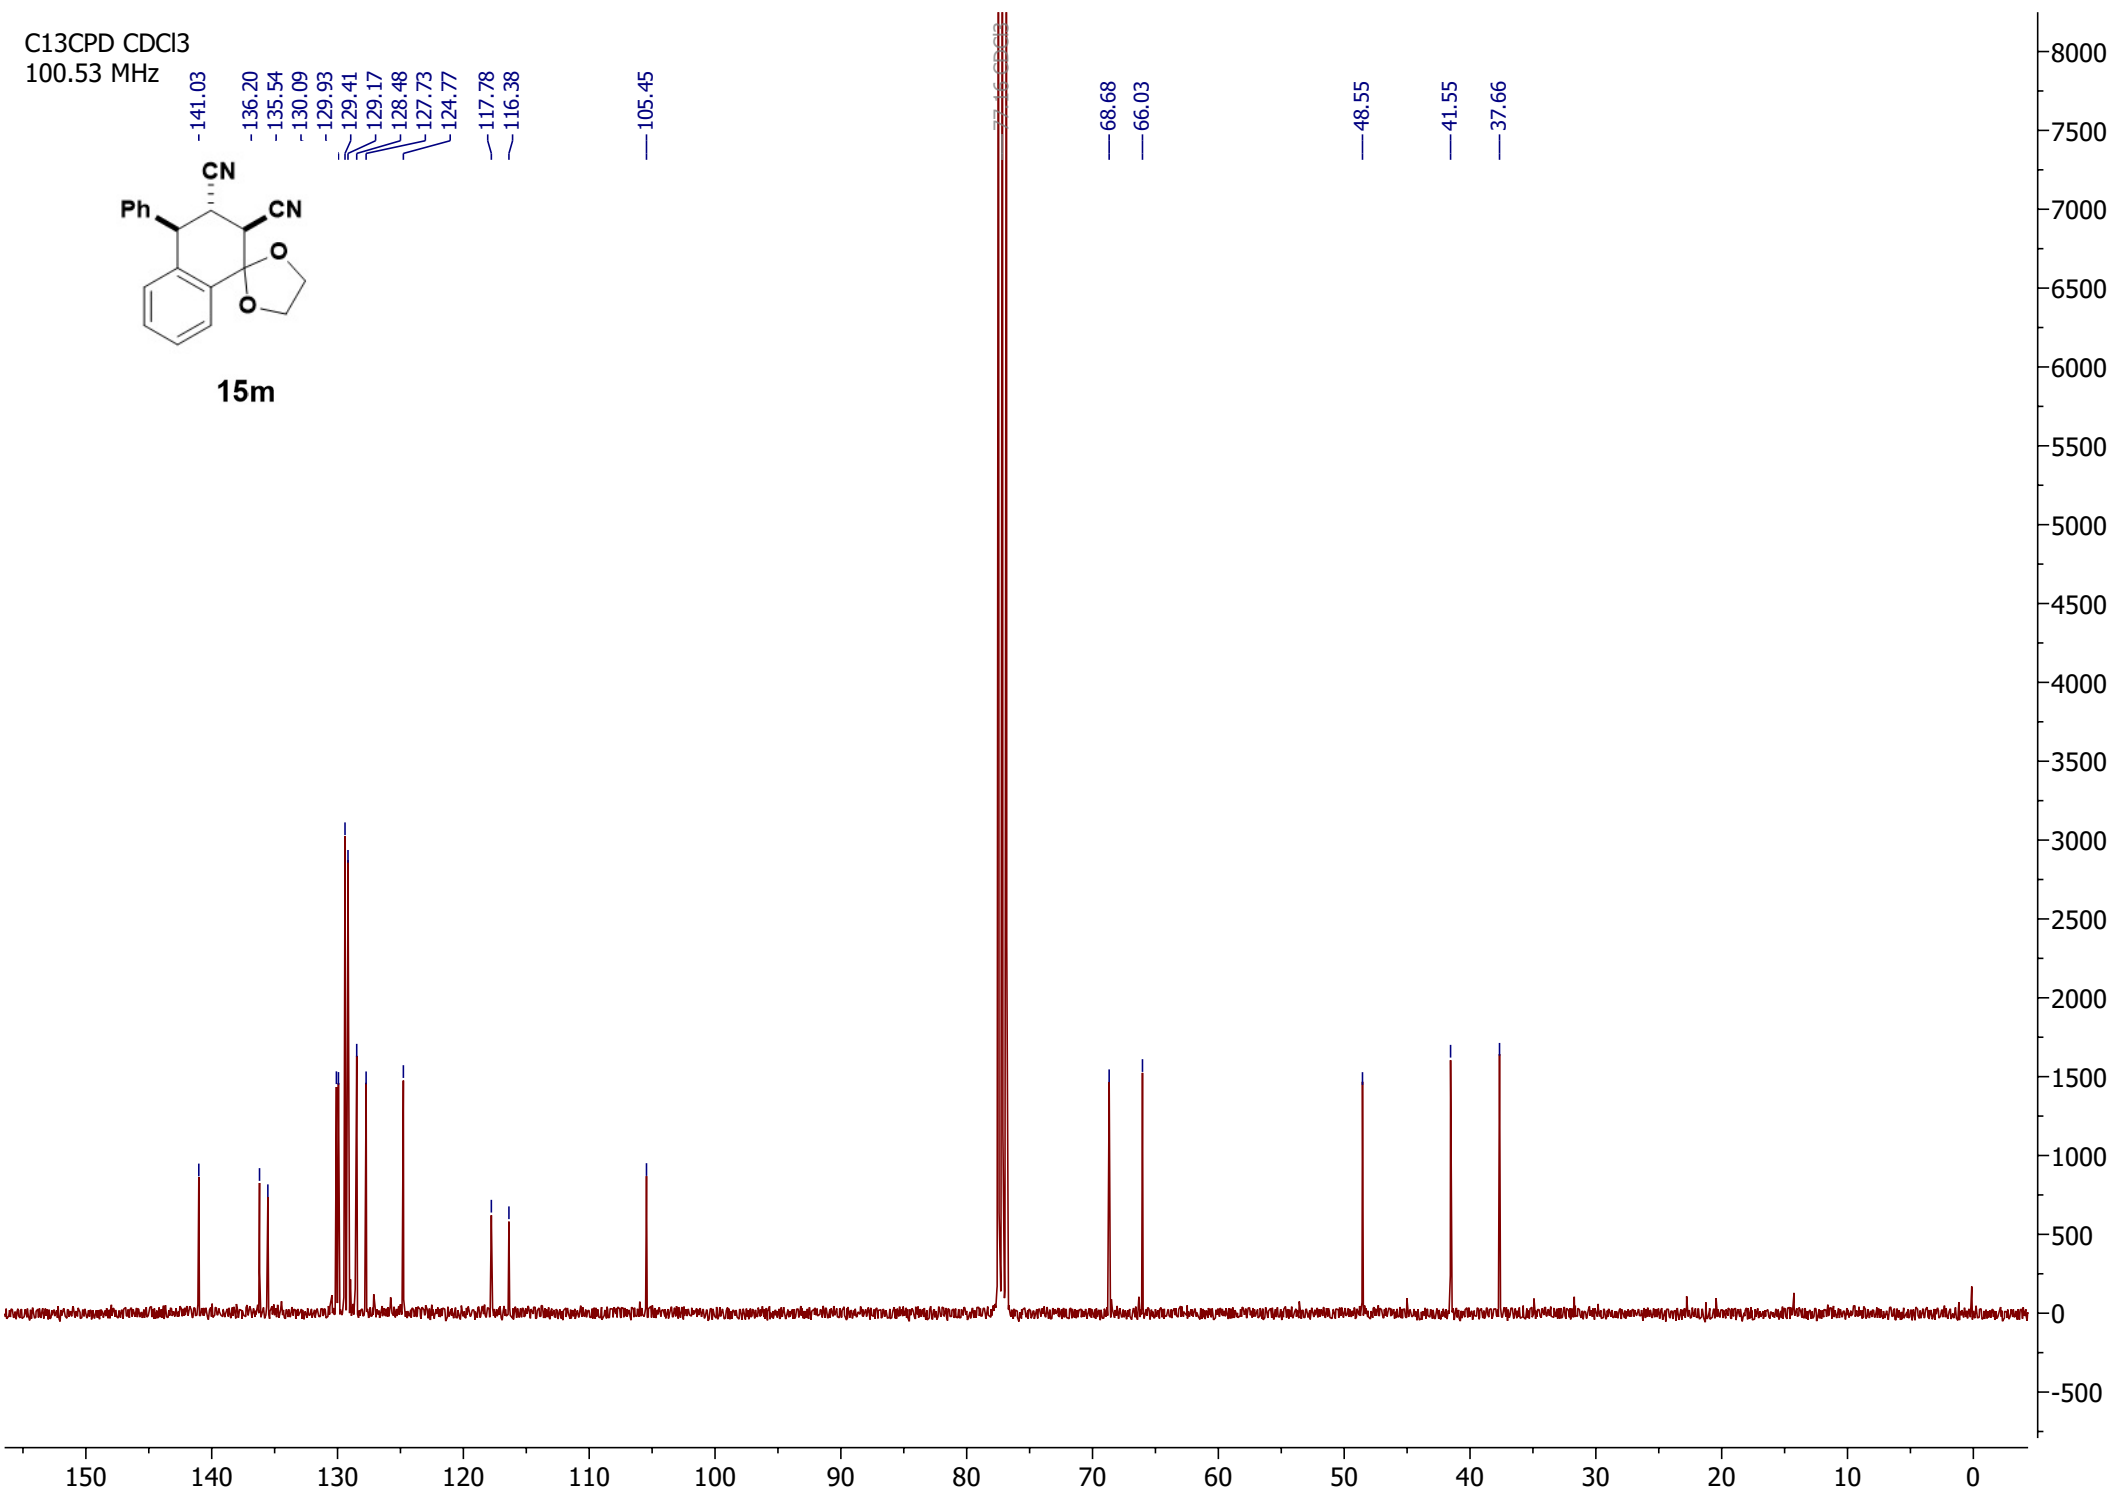



PROTON CDCl3

7.59, 7.57, 7.49, 7.48, 7.47, 7.47, 7.45, 7.39, 7.39, 7.37, 7.37, 7.36, 7.35, 7.35, 7.34, 7.33, 7.33, 7.32, 7.31, 7.27, 7.26, 7.25, 7.25, 7.24, 7.24, 7.23, 7.22, 7.21, 7.20, 7.19, 4.89, 4.86

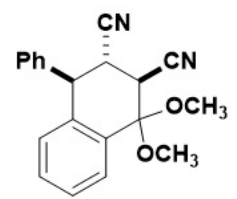

15n

F (m) 7.36  
E (td) 7.47  
D (d) 7.58  
G (m) 7.23

A (d) 4.87

B (m) 3.81

C (m) 3.28

-0.00 TMS

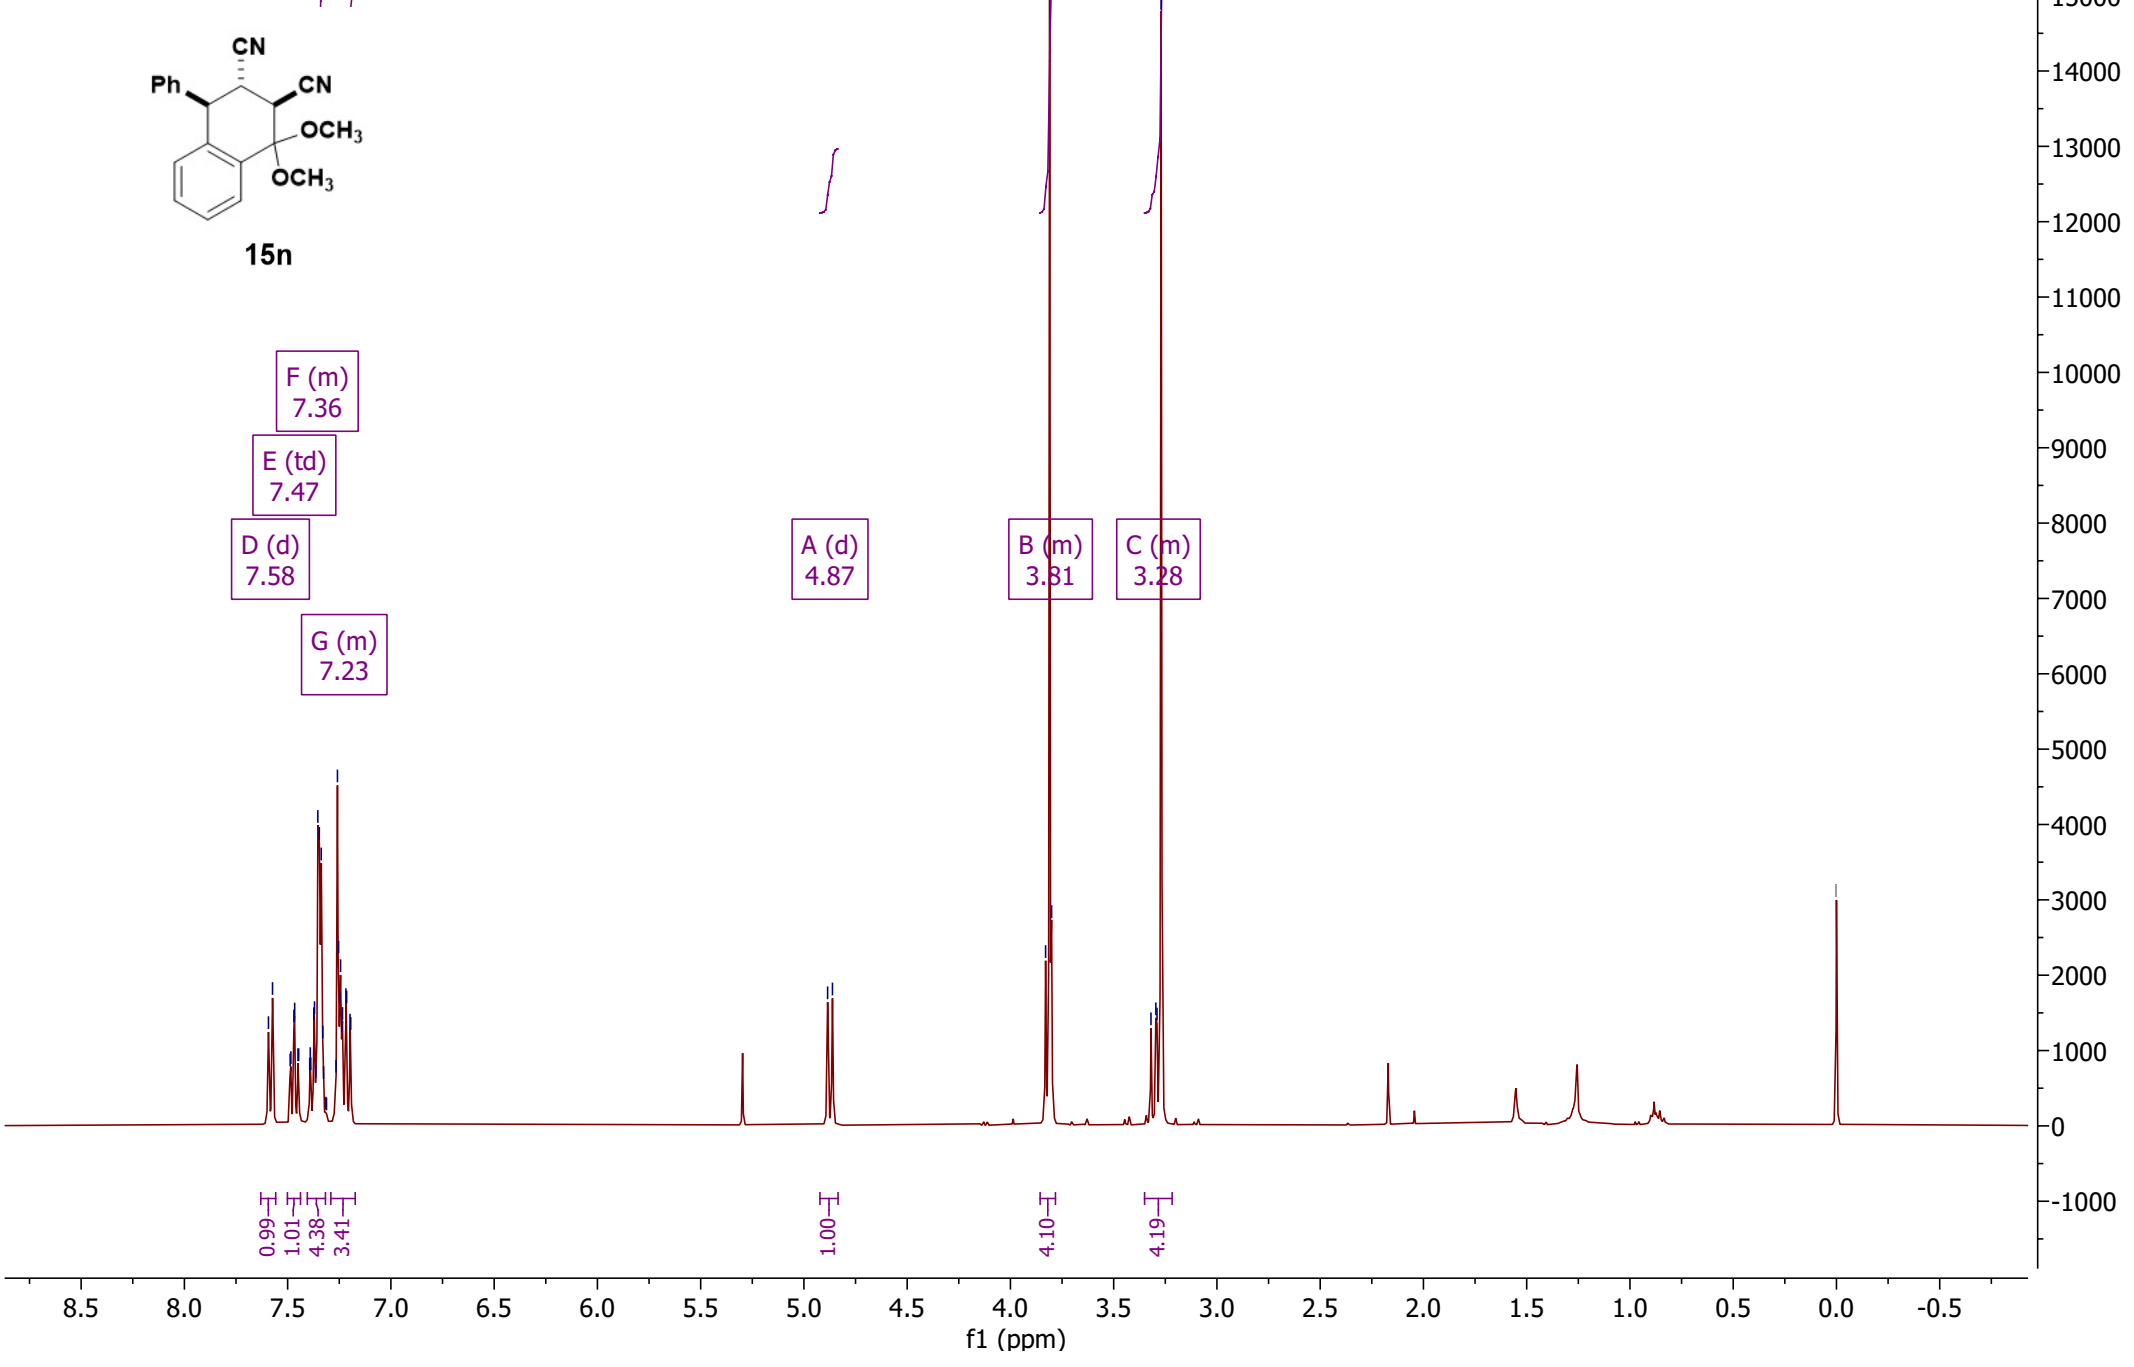

C13CPD CDCl3  
100.53 MHz

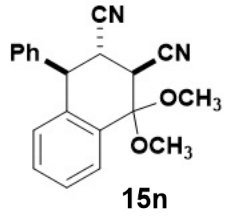

140.51  
136.01  
134.83  
129.66  
129.63  
129.21  
128.49  
128.29  
128.12  
127.34  
117.97  
115.38

81.36  
78.72  
77.10 CDCl3

59.80

51.53

37.57

33.74

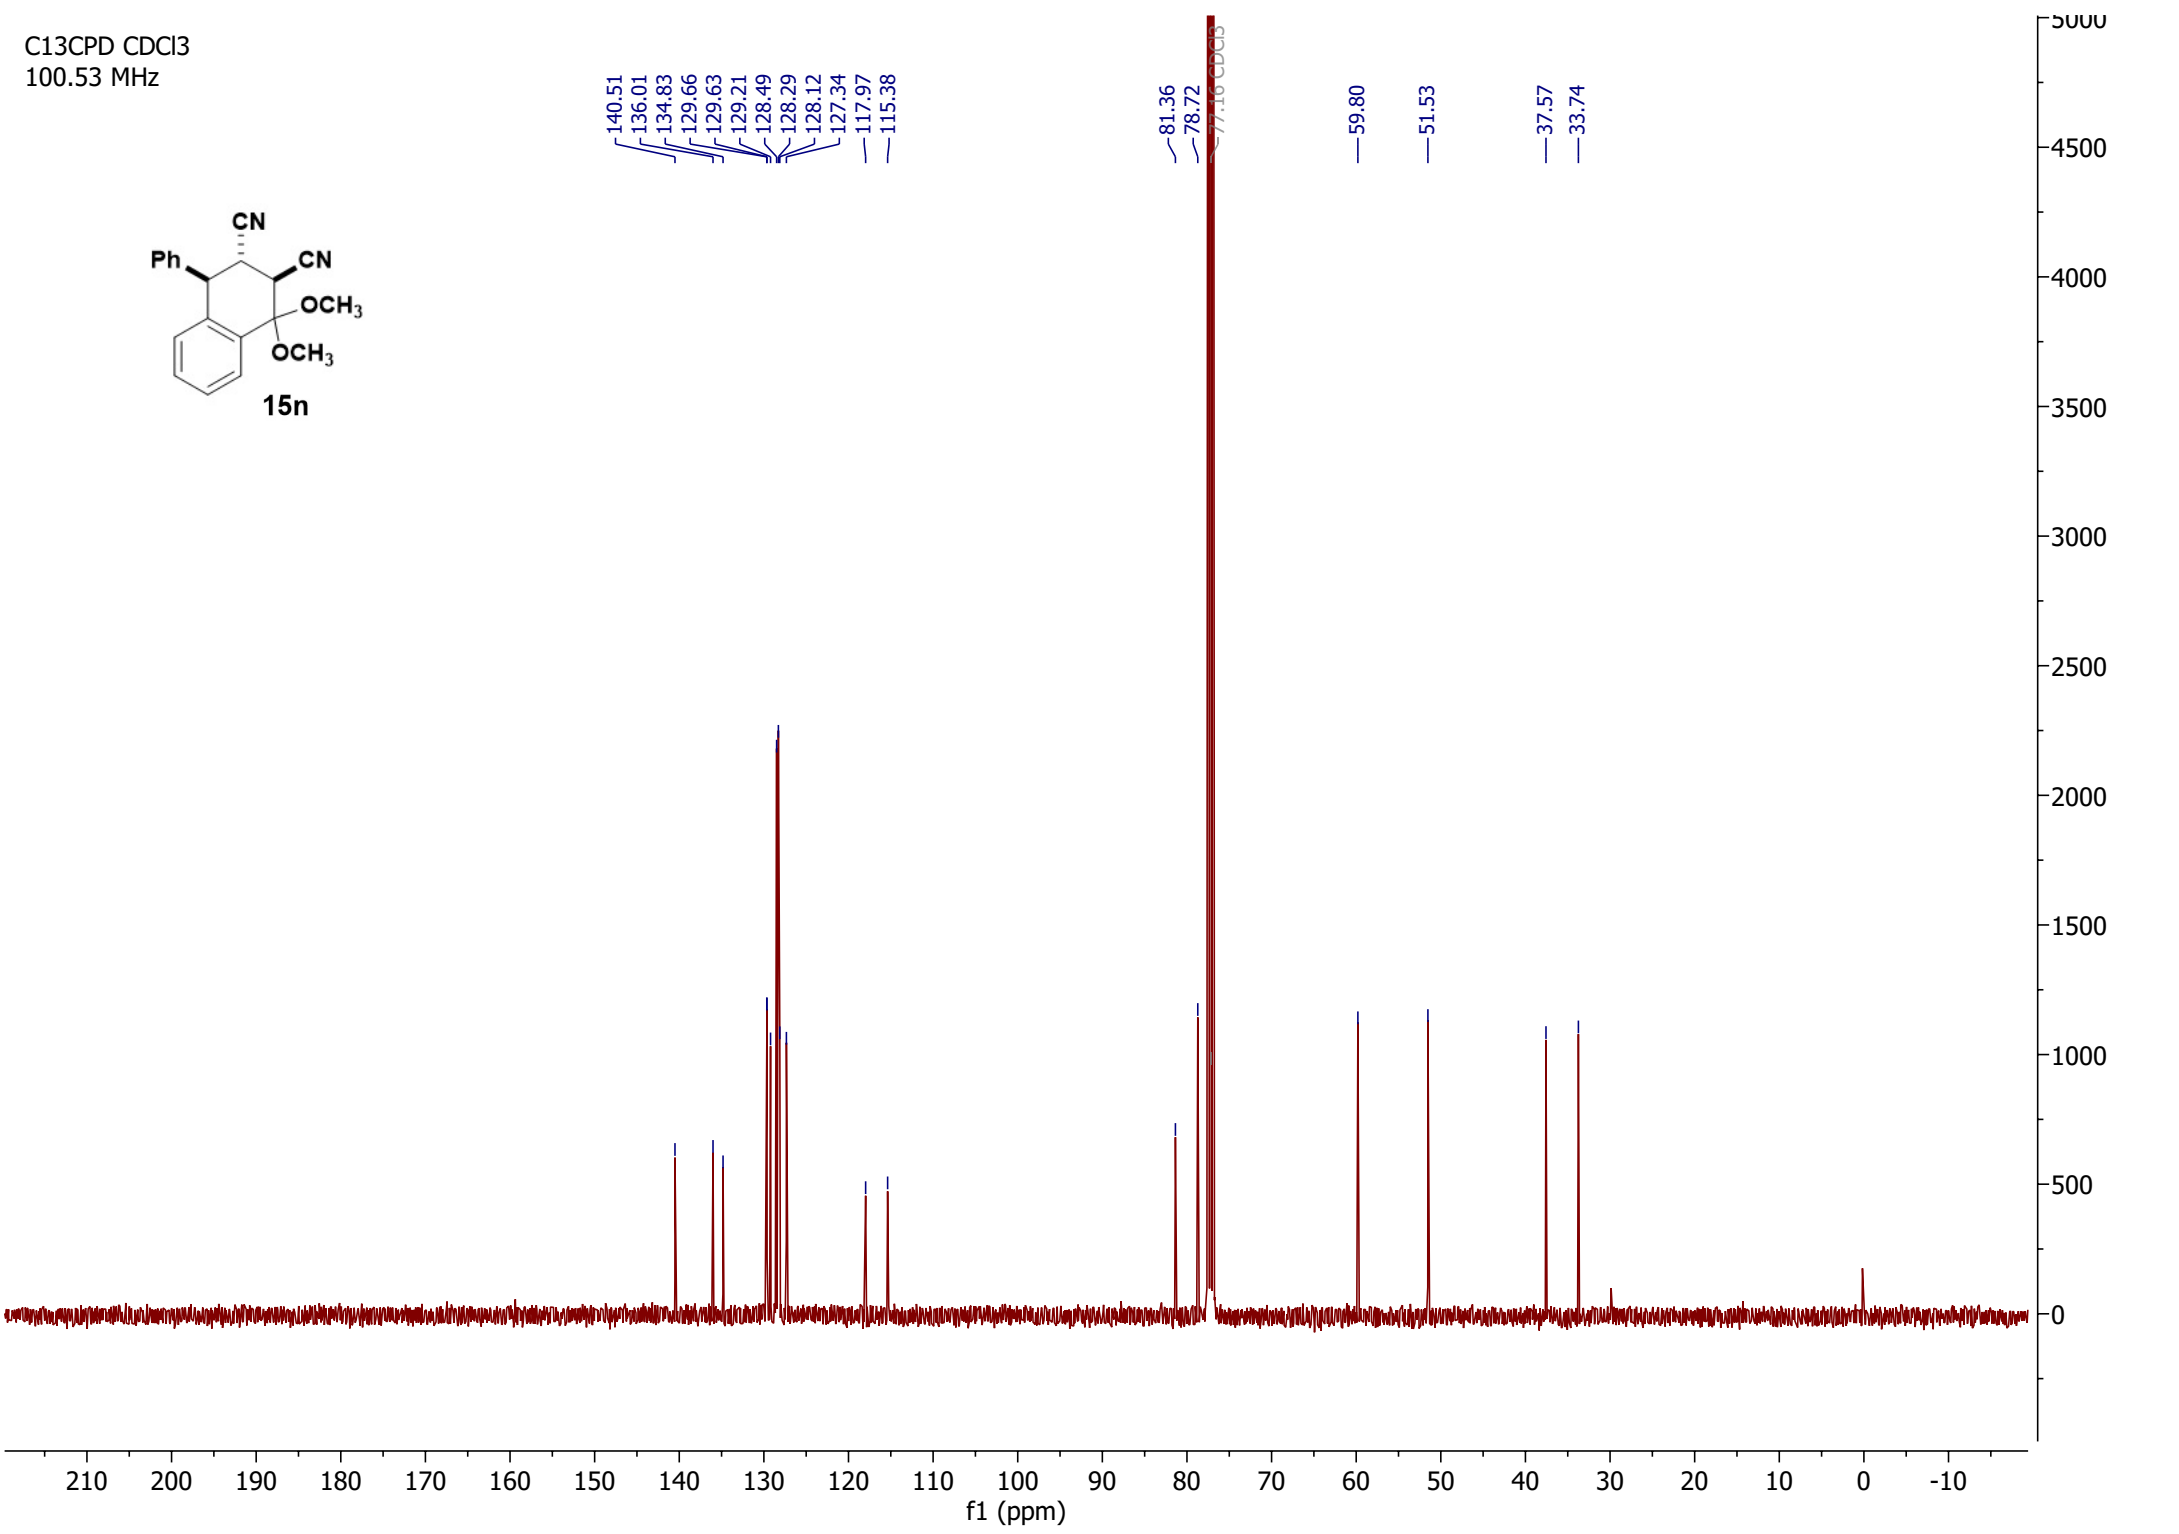



C13CPD CDCl3  
100.53 MHz

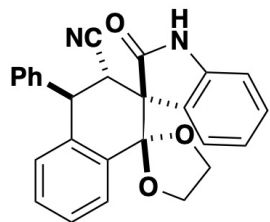

15o

175.67

142.03  
141.93  
137.68  
136.59  
129.91  
129.81  
129.74  
129.42  
129.25  
128.07  
127.57  
125.34  
125.04  
124.38  
122.89  
118.14  
110.49  
108.83

77.16

68.62  
66.02

57.36

46.40

40.88

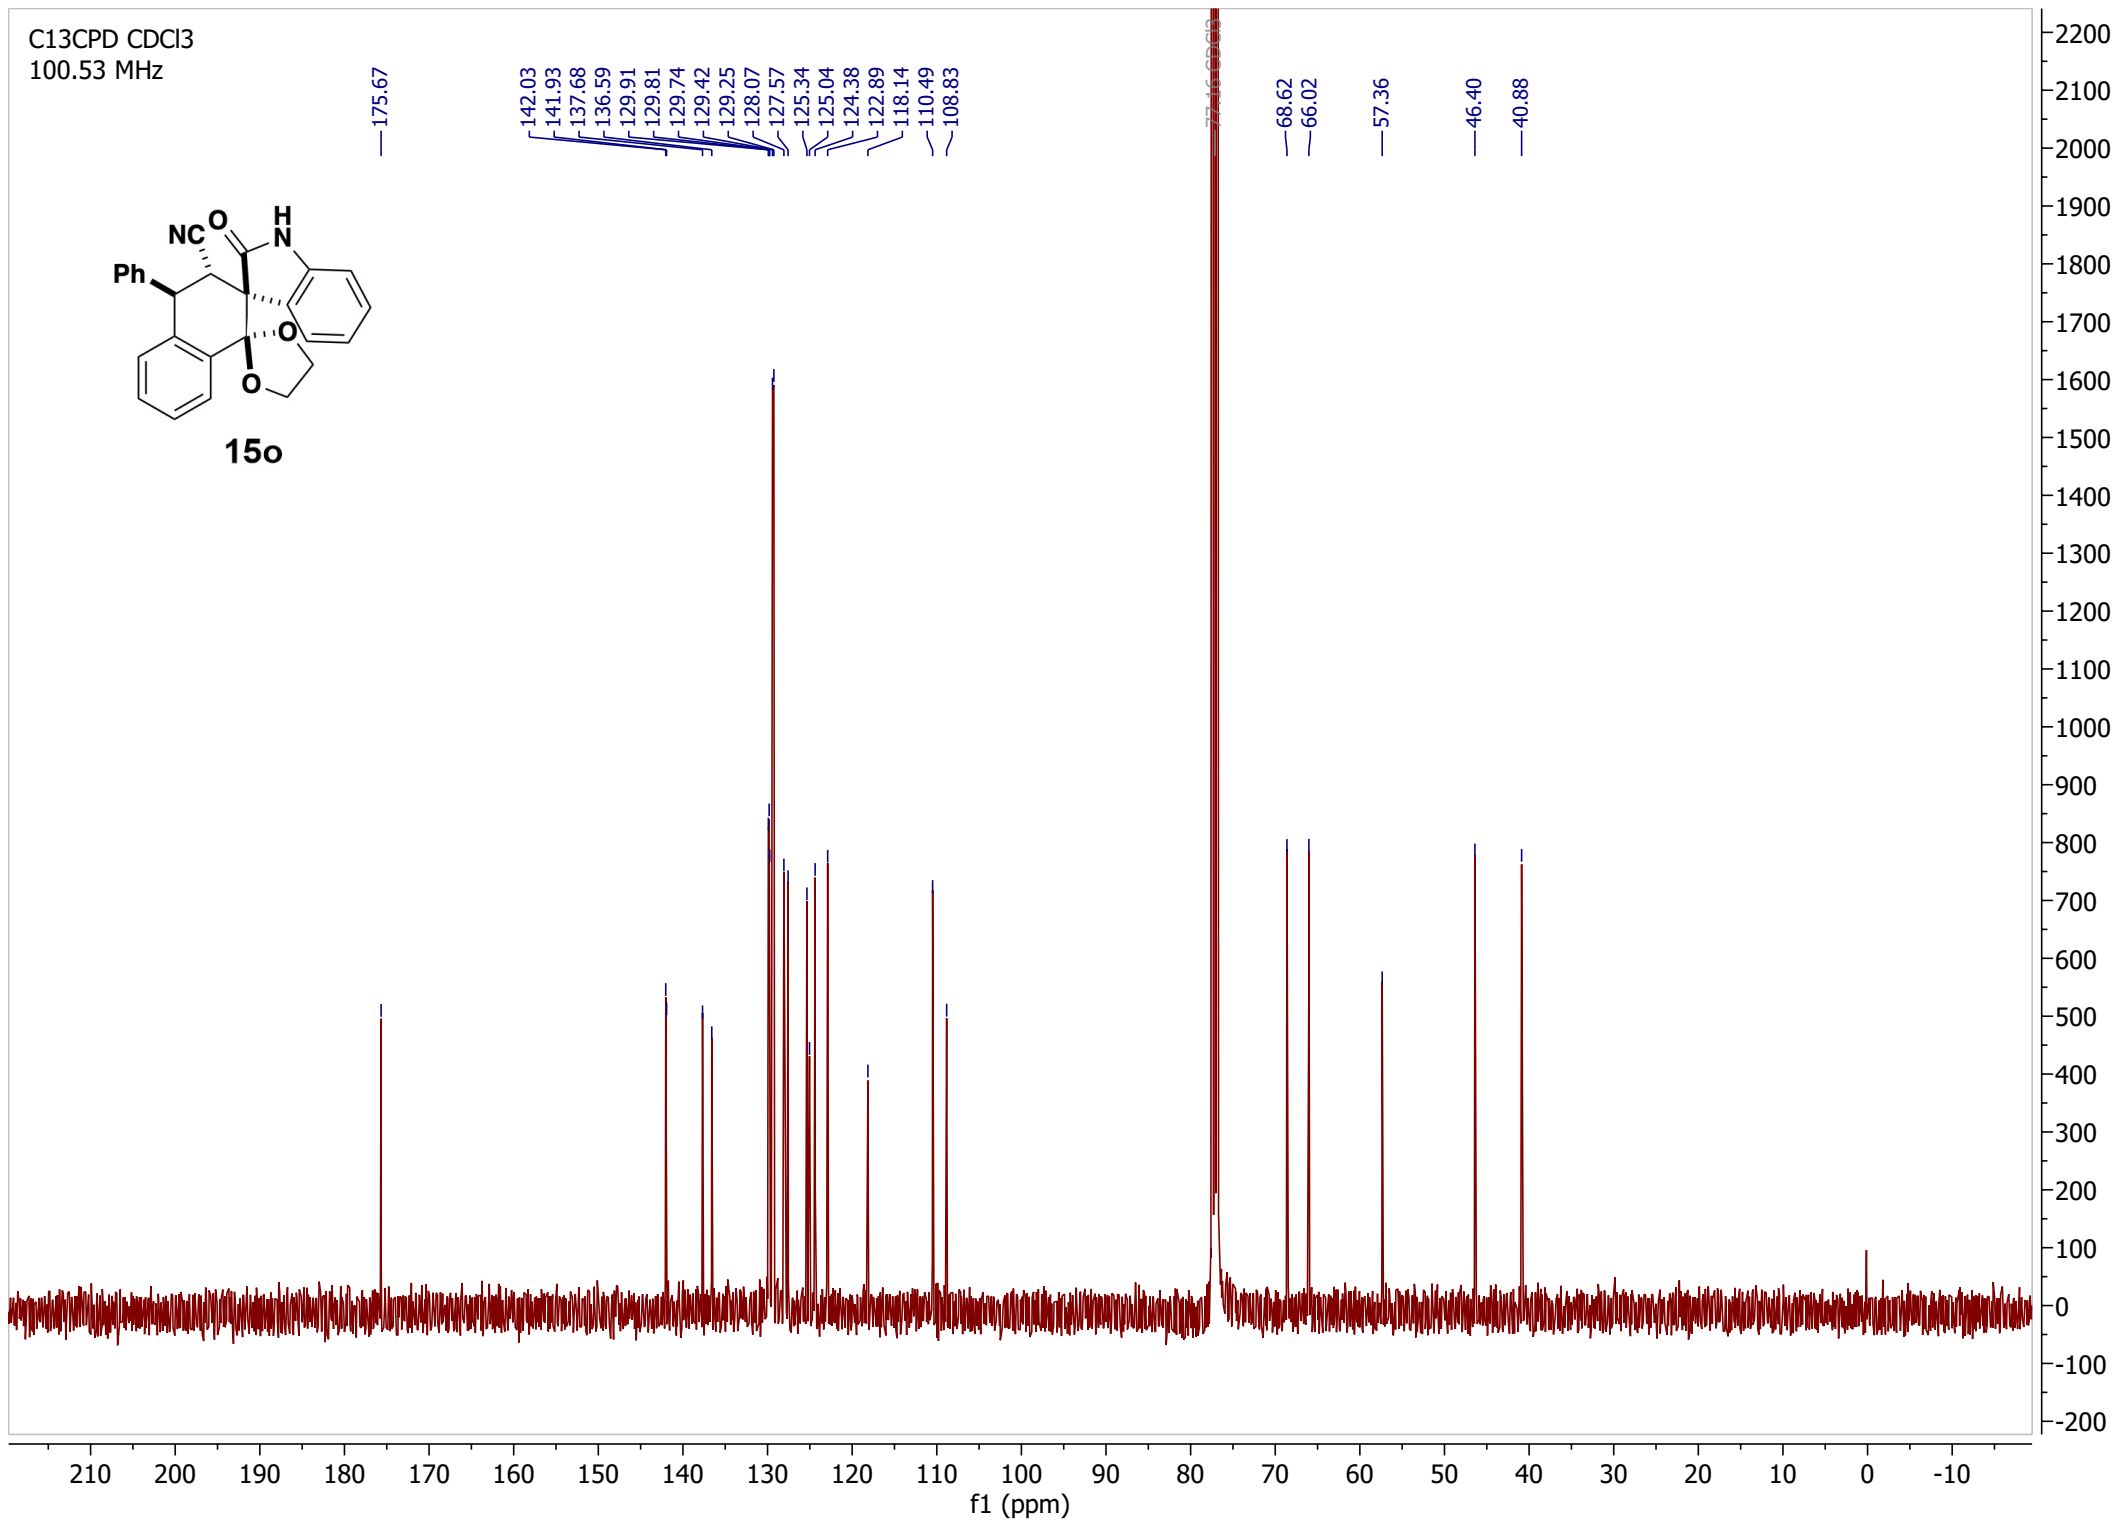

PROTON CDCl3

399.77 MHz

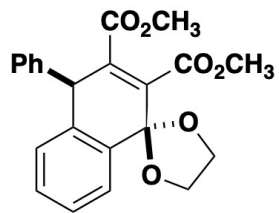

15p

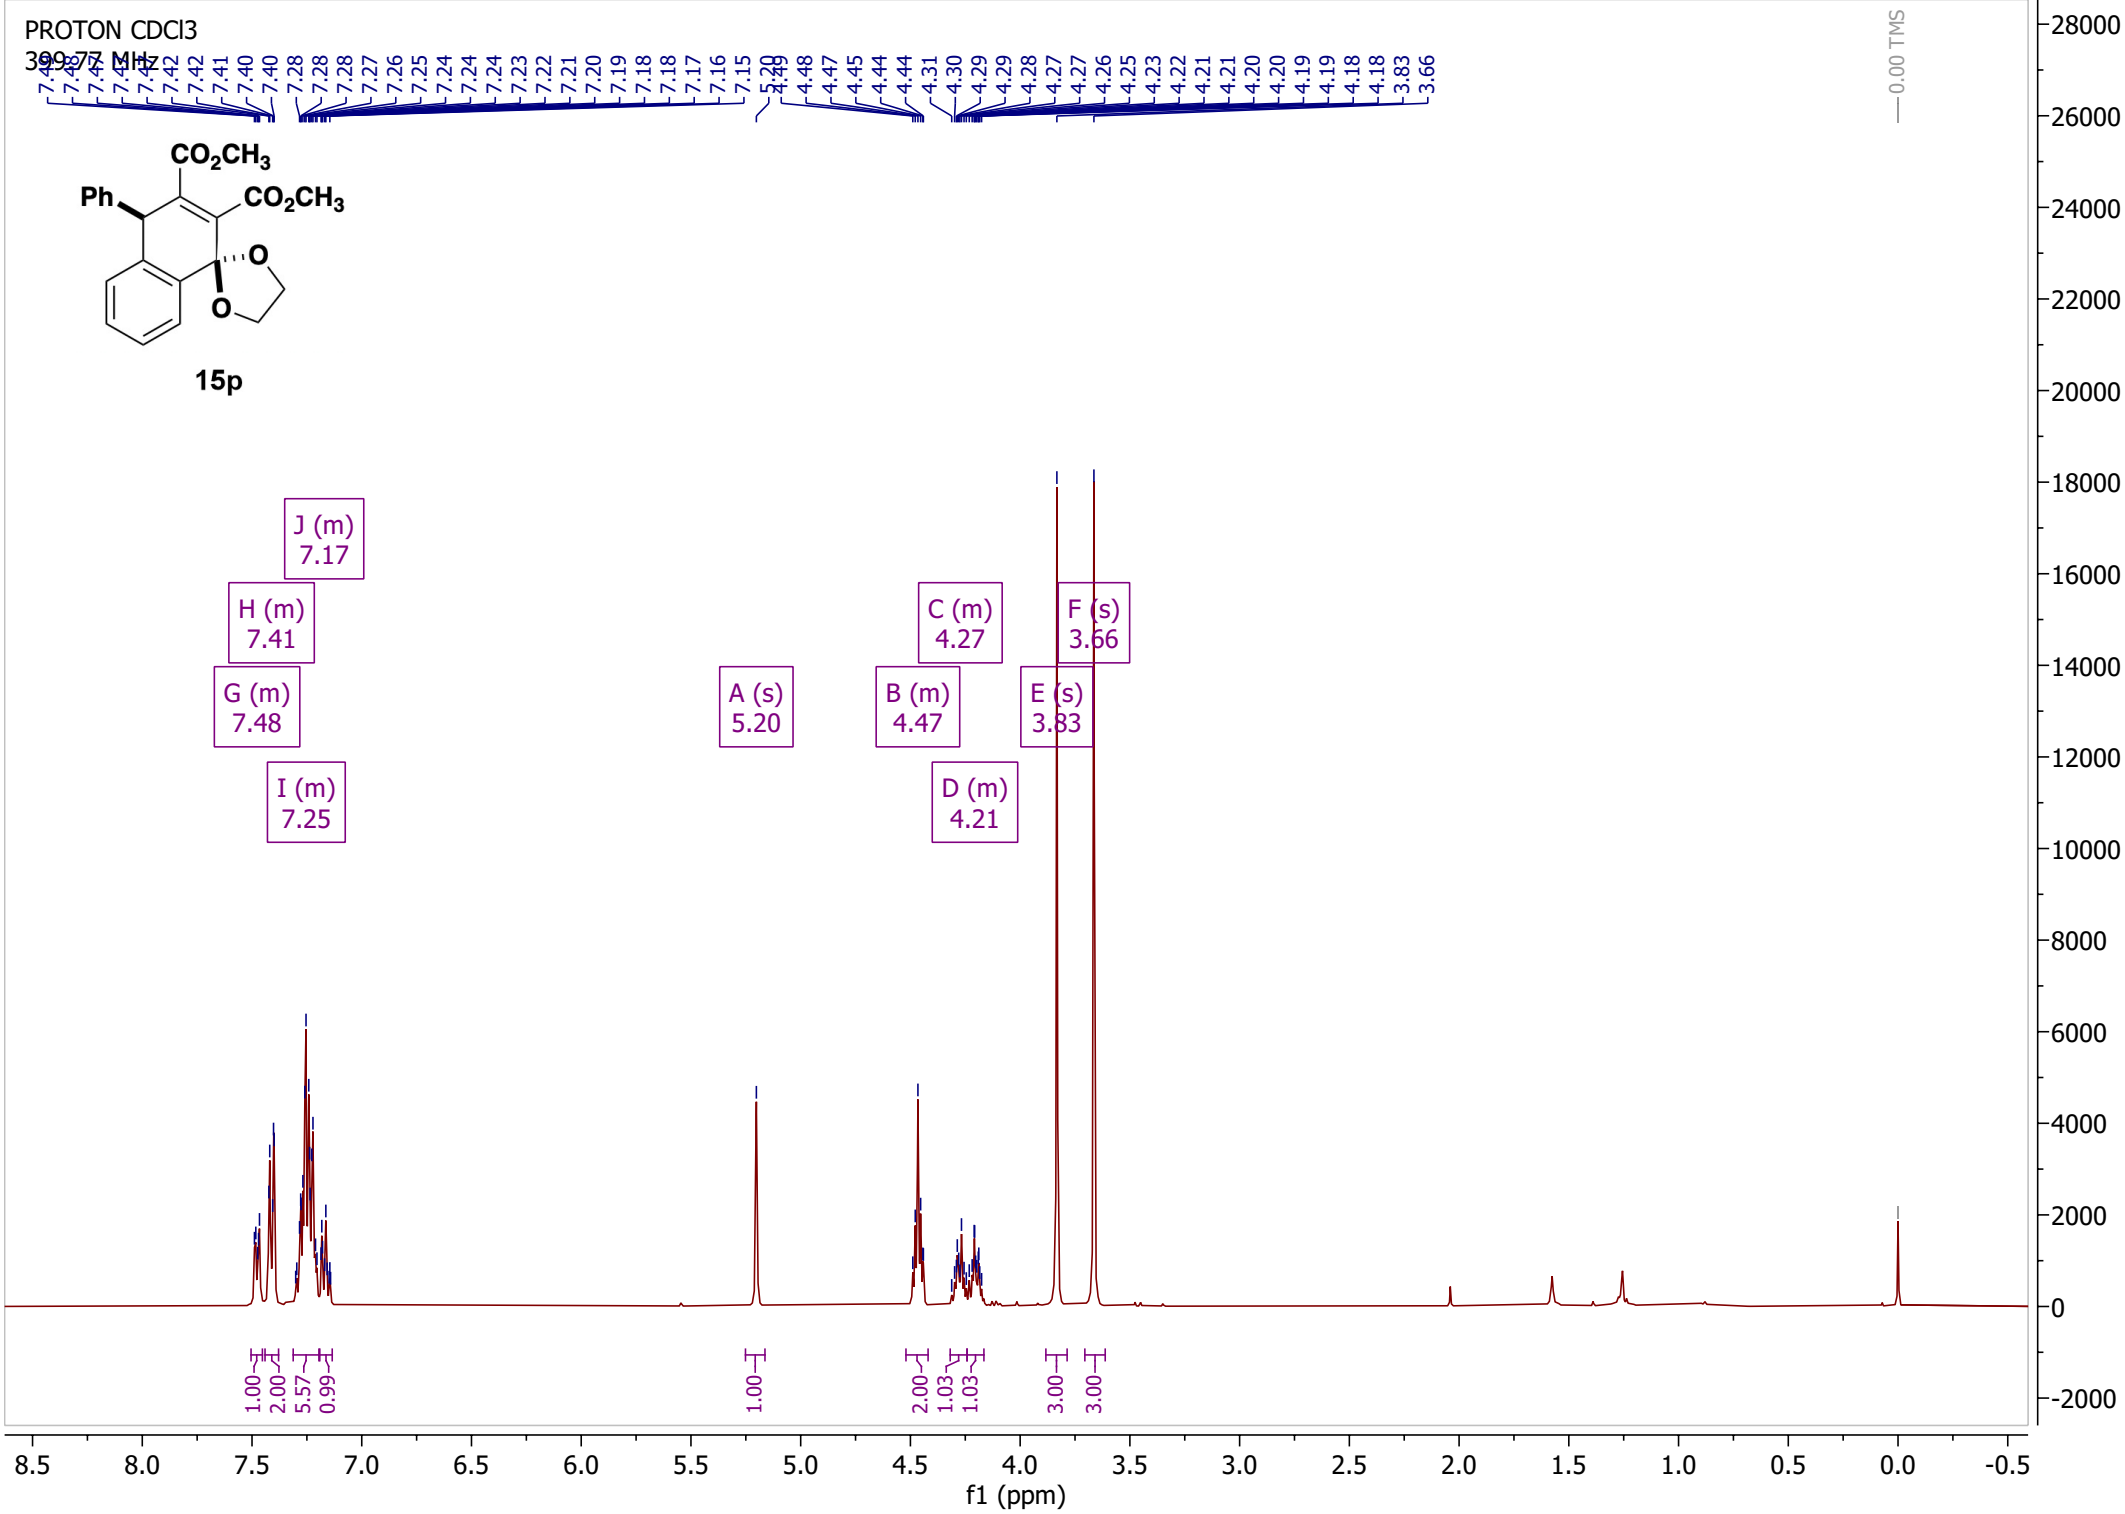

C13CPD CDCl3  
100.53 MHz

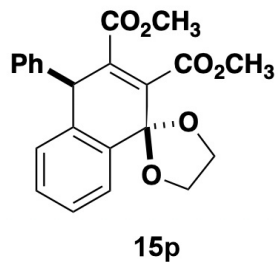

167.37  
165.81

140.27  
139.25  
137.99  
137.04  
135.12  
129.03  
128.95  
128.93  
128.55  
127.19  
127.15  
124.85

103.83

77.16 CDCl3

68.93  
65.30

52.63  
52.60  
46.73

210 200 190 180 170 160 150 140 130 120 110 100 90 80 70 60 50 40 30 20 10 0 -10

f1 (ppm)

19000  
18000  
17000  
16000  
15000  
14000  
13000  
12000  
11000  
10000  
9000  
8000  
7000  
6000  
5000  
4000  
3000  
2000  
1000  
0  
-1000

PROTON CDCl3 /home/nmrdata/Shaw amines19 6

399.77 MHz

7.43 7.42 7.41 7.40 7.36 7.35 7.34 7.32 7.29 CDCl3 7.28 7.27 7.26 7.24 7.24 7.22 7.21 7.19 7.17 7.17 7.16 7.15 7.14 6.73 6.71 5.47 5.46 5.45 5.44 5.33 5.30 4.67 4.65 4.35 4.32 4.32 4.31 4.28 4.27 4.25 4.14 4.13 4.12 4.11 4.11 4.09 4.09 4.08 4.07 4.06 4.06 4.05 3.74 3.72 3.71 3.71 3.69

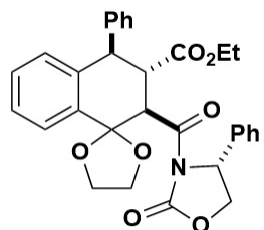

15q

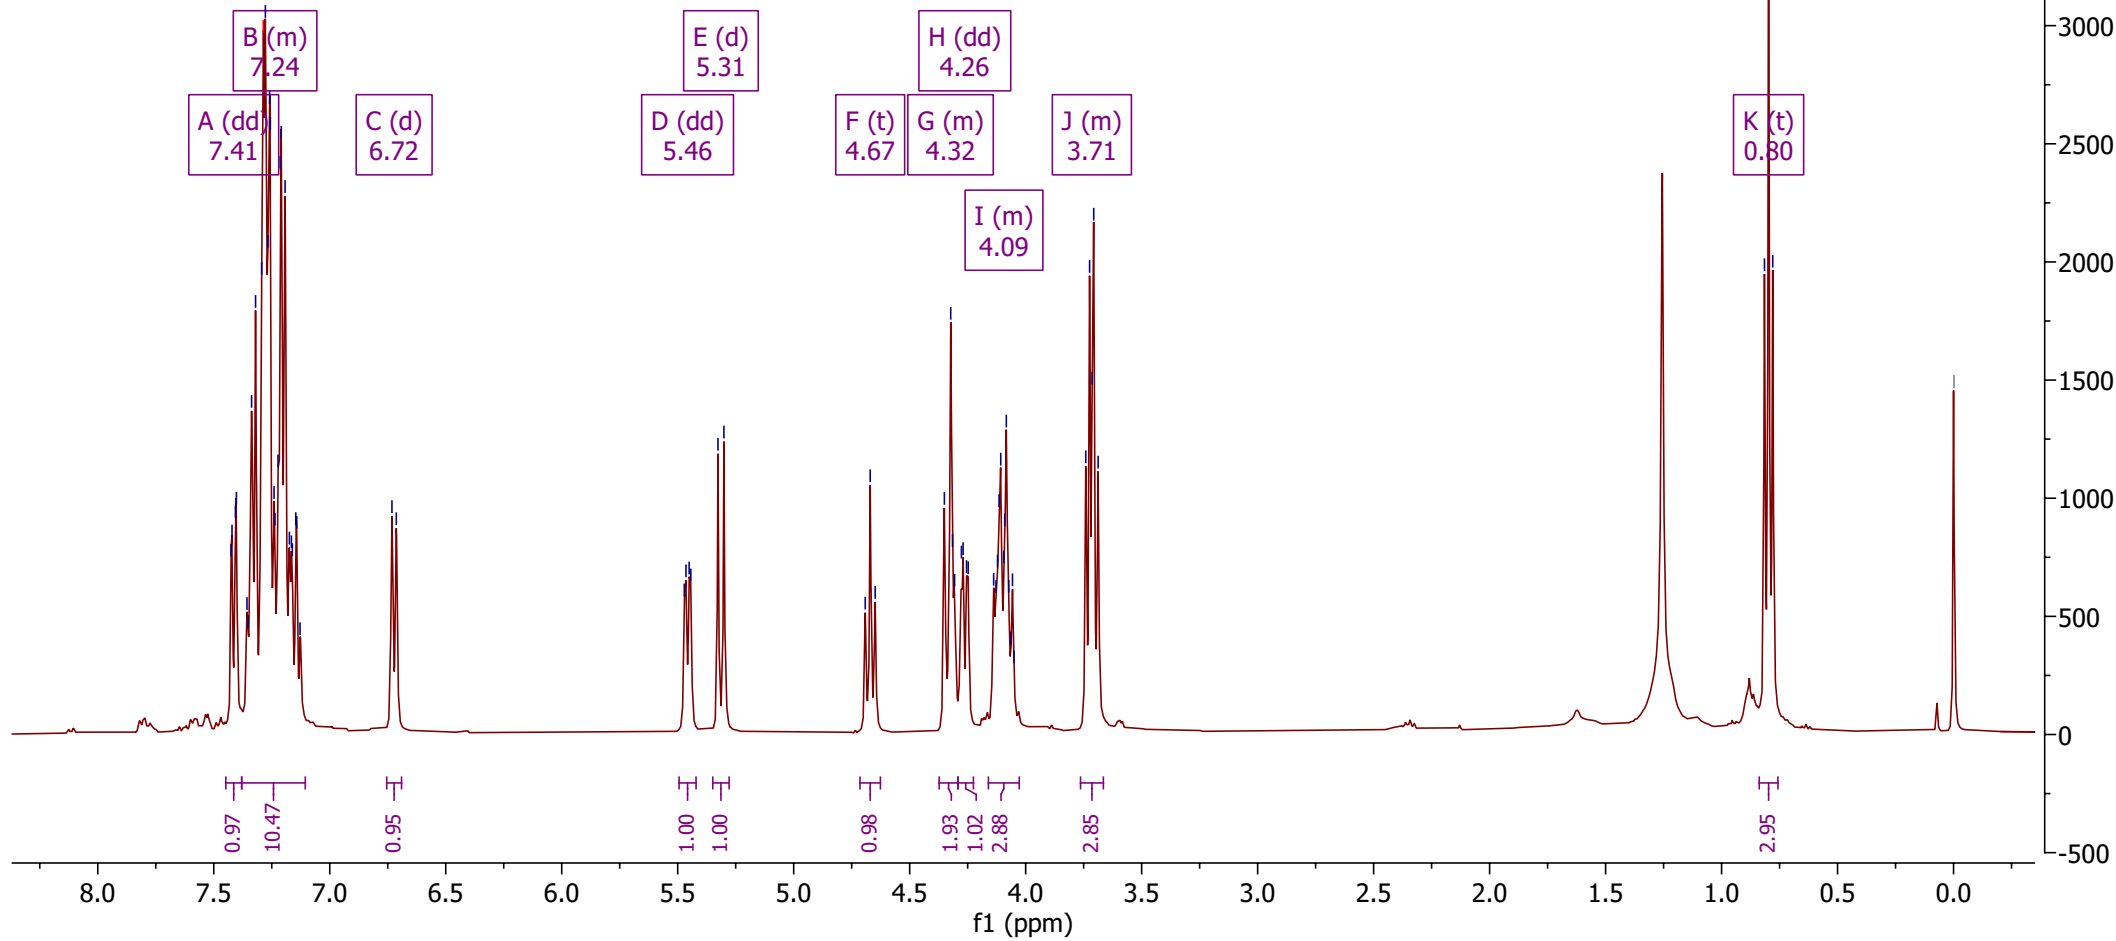

C13CPD CDCl3 /home/nmrdata/Shaw amines19 6  
100.53 MHz

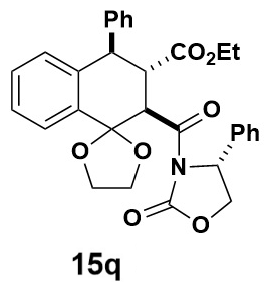

173.12  
170.90

153.41

142.78

139.41

138.97

137.17

129.56

129.20

129.07

128.98

128.54

127.04

126.39

125.88

123.48

107.88

77.16 CDCl3

69.77

67.00

65.11

60.59

58.27

49.71

48.91

47.94

13.84

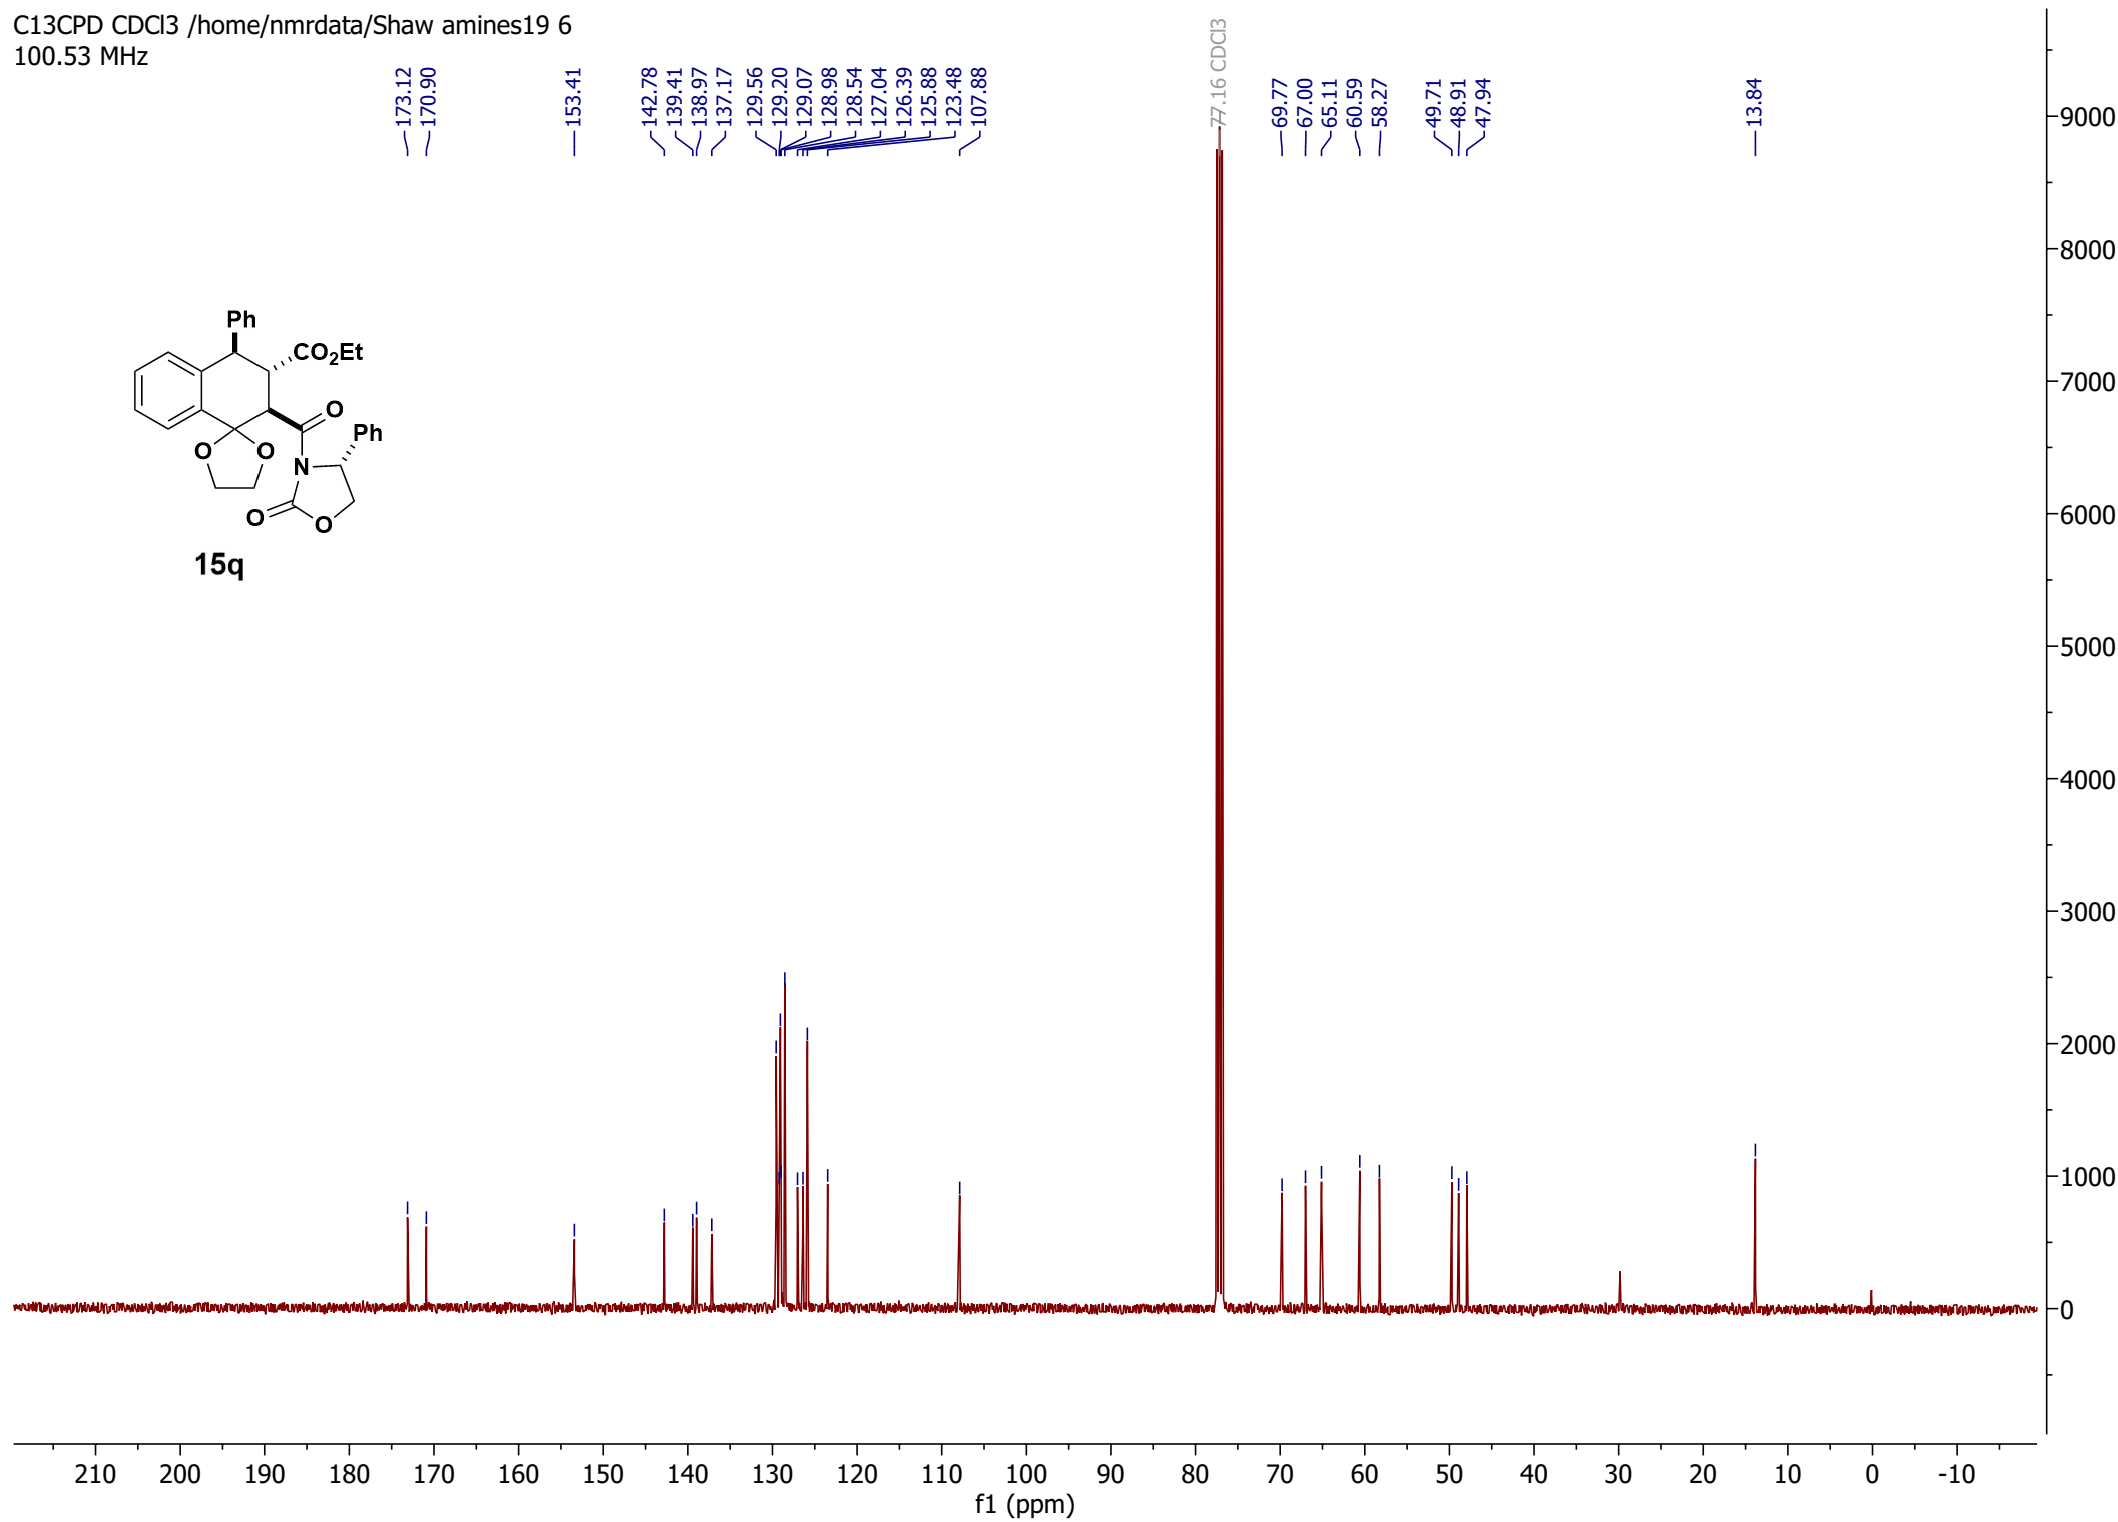



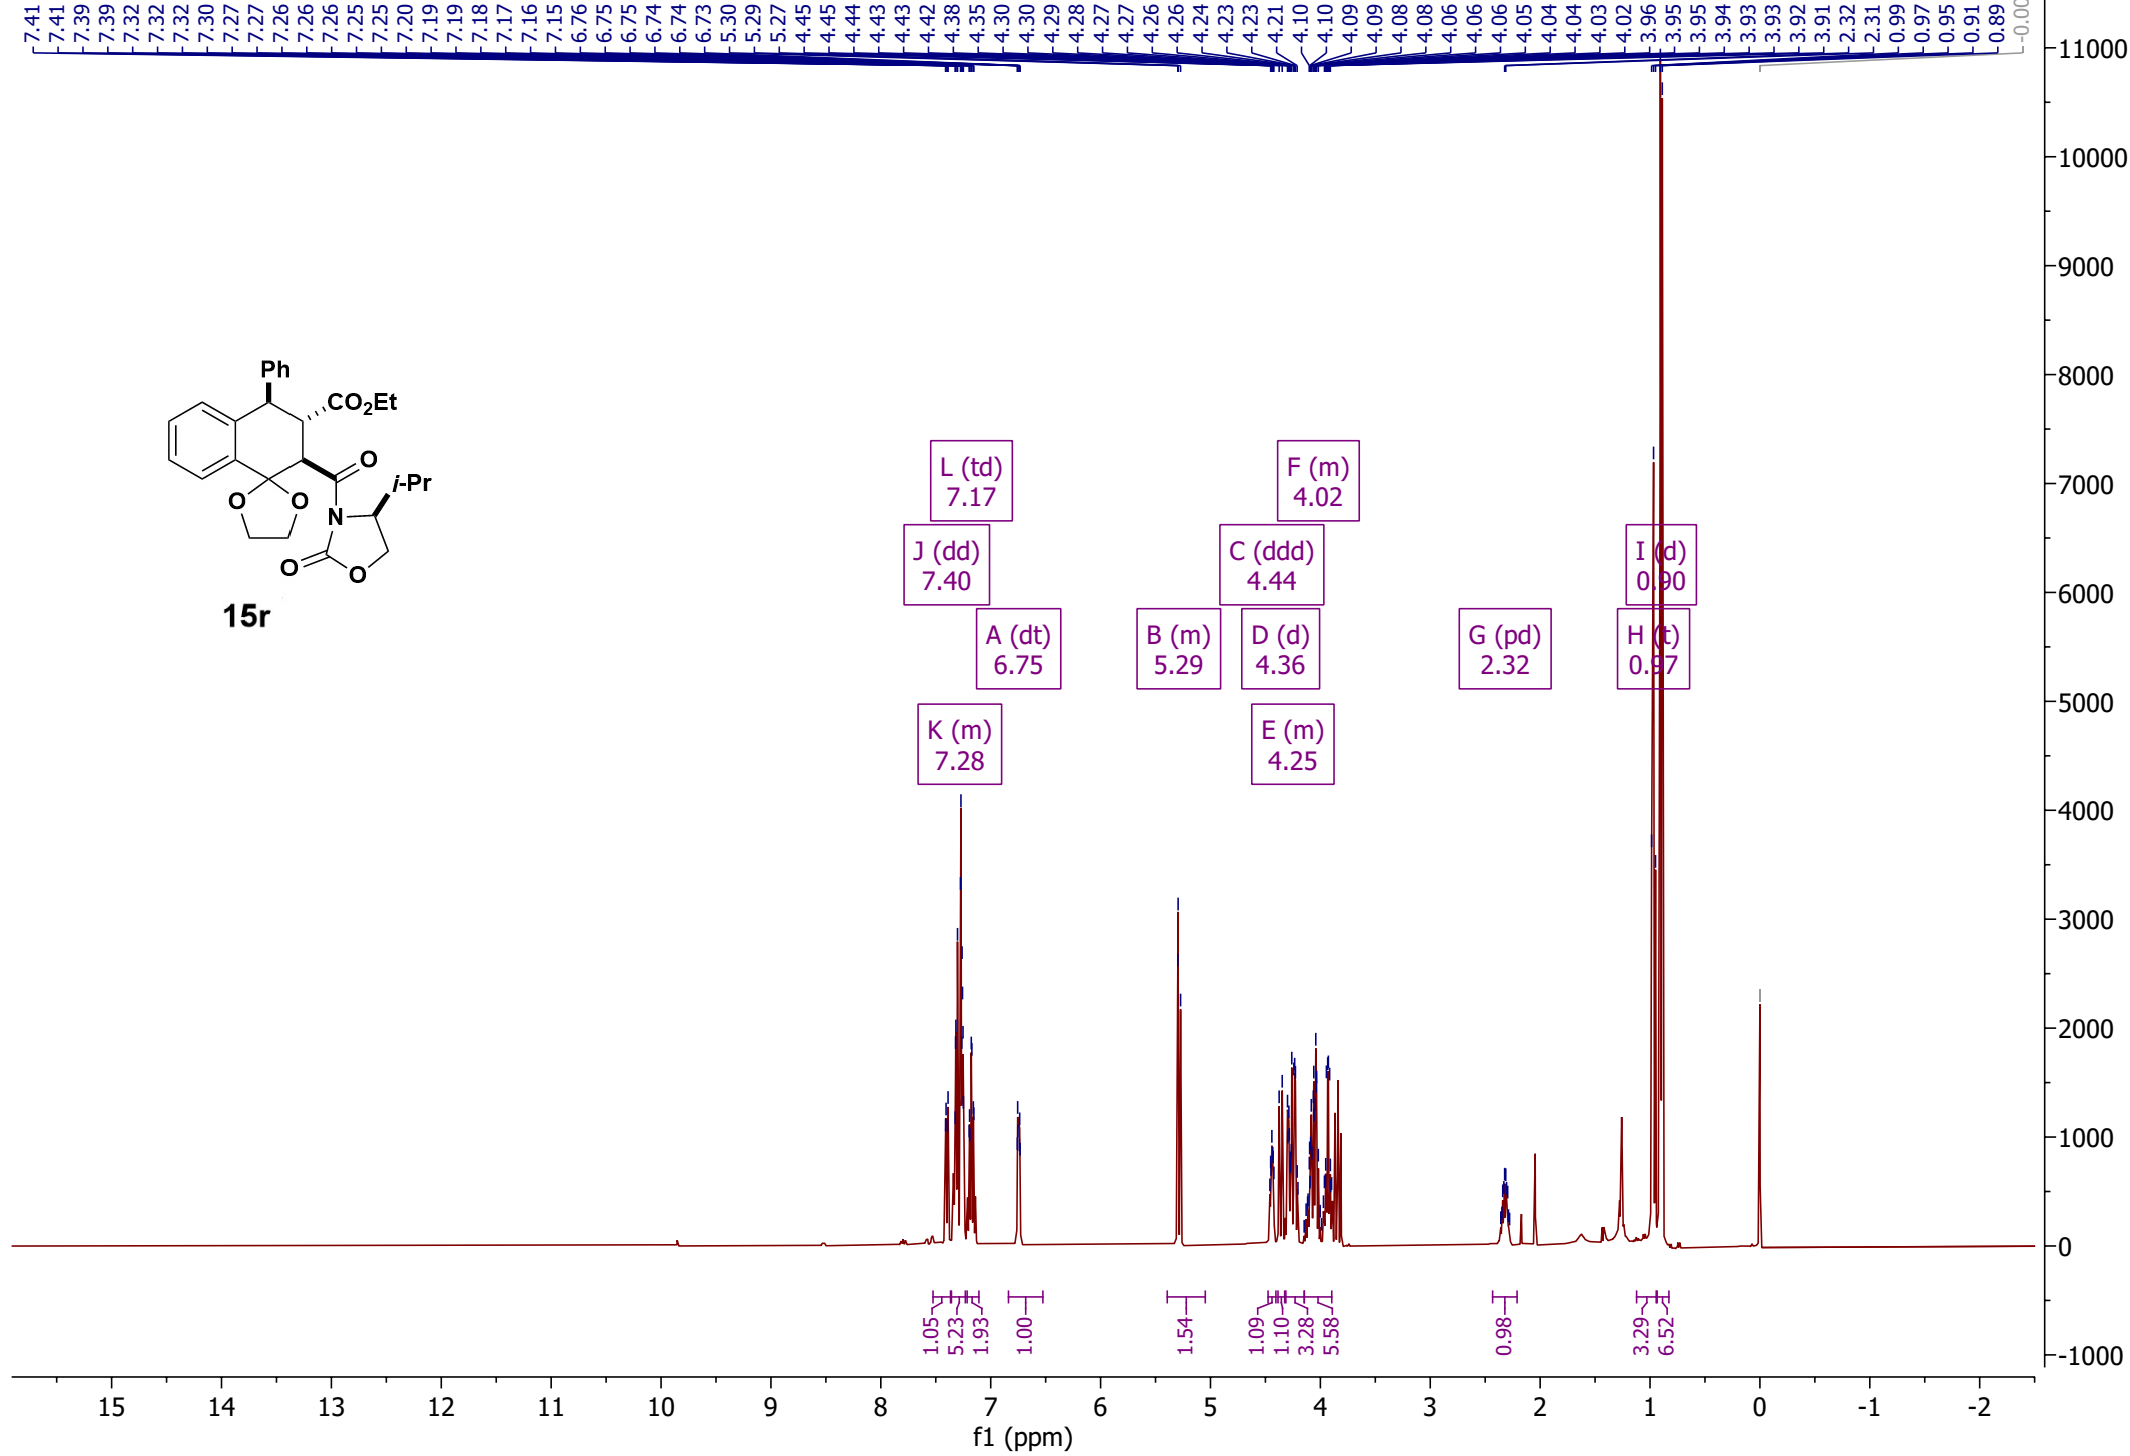

C13CPD CDCl3 /home/nmrdata/Shaw emilyj28 17  
100.53 MHz

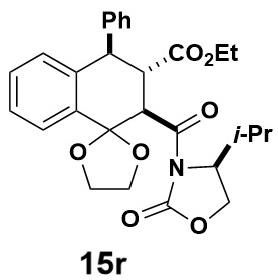

173.35  
171.48

153.85

142.95

139.45

137.16

129.60

129.20

128.97

128.57

127.05

126.38

123.48

107.87

77.16 CDCl<sub>3</sub>

66.92

65.06

63.37

60.71

59.44

49.85

48.67

47.91

28.85

18.04

14.95

13.99

210 200 190 180 170 160 150 140 130 120 110 100 90 80 70 60 50 40 30 20 10 0 -10

f1 (ppm)

9000  
8000  
7000  
6000  
5000  
4000  
3000  
2000  
1000  
0

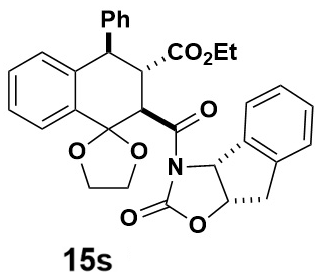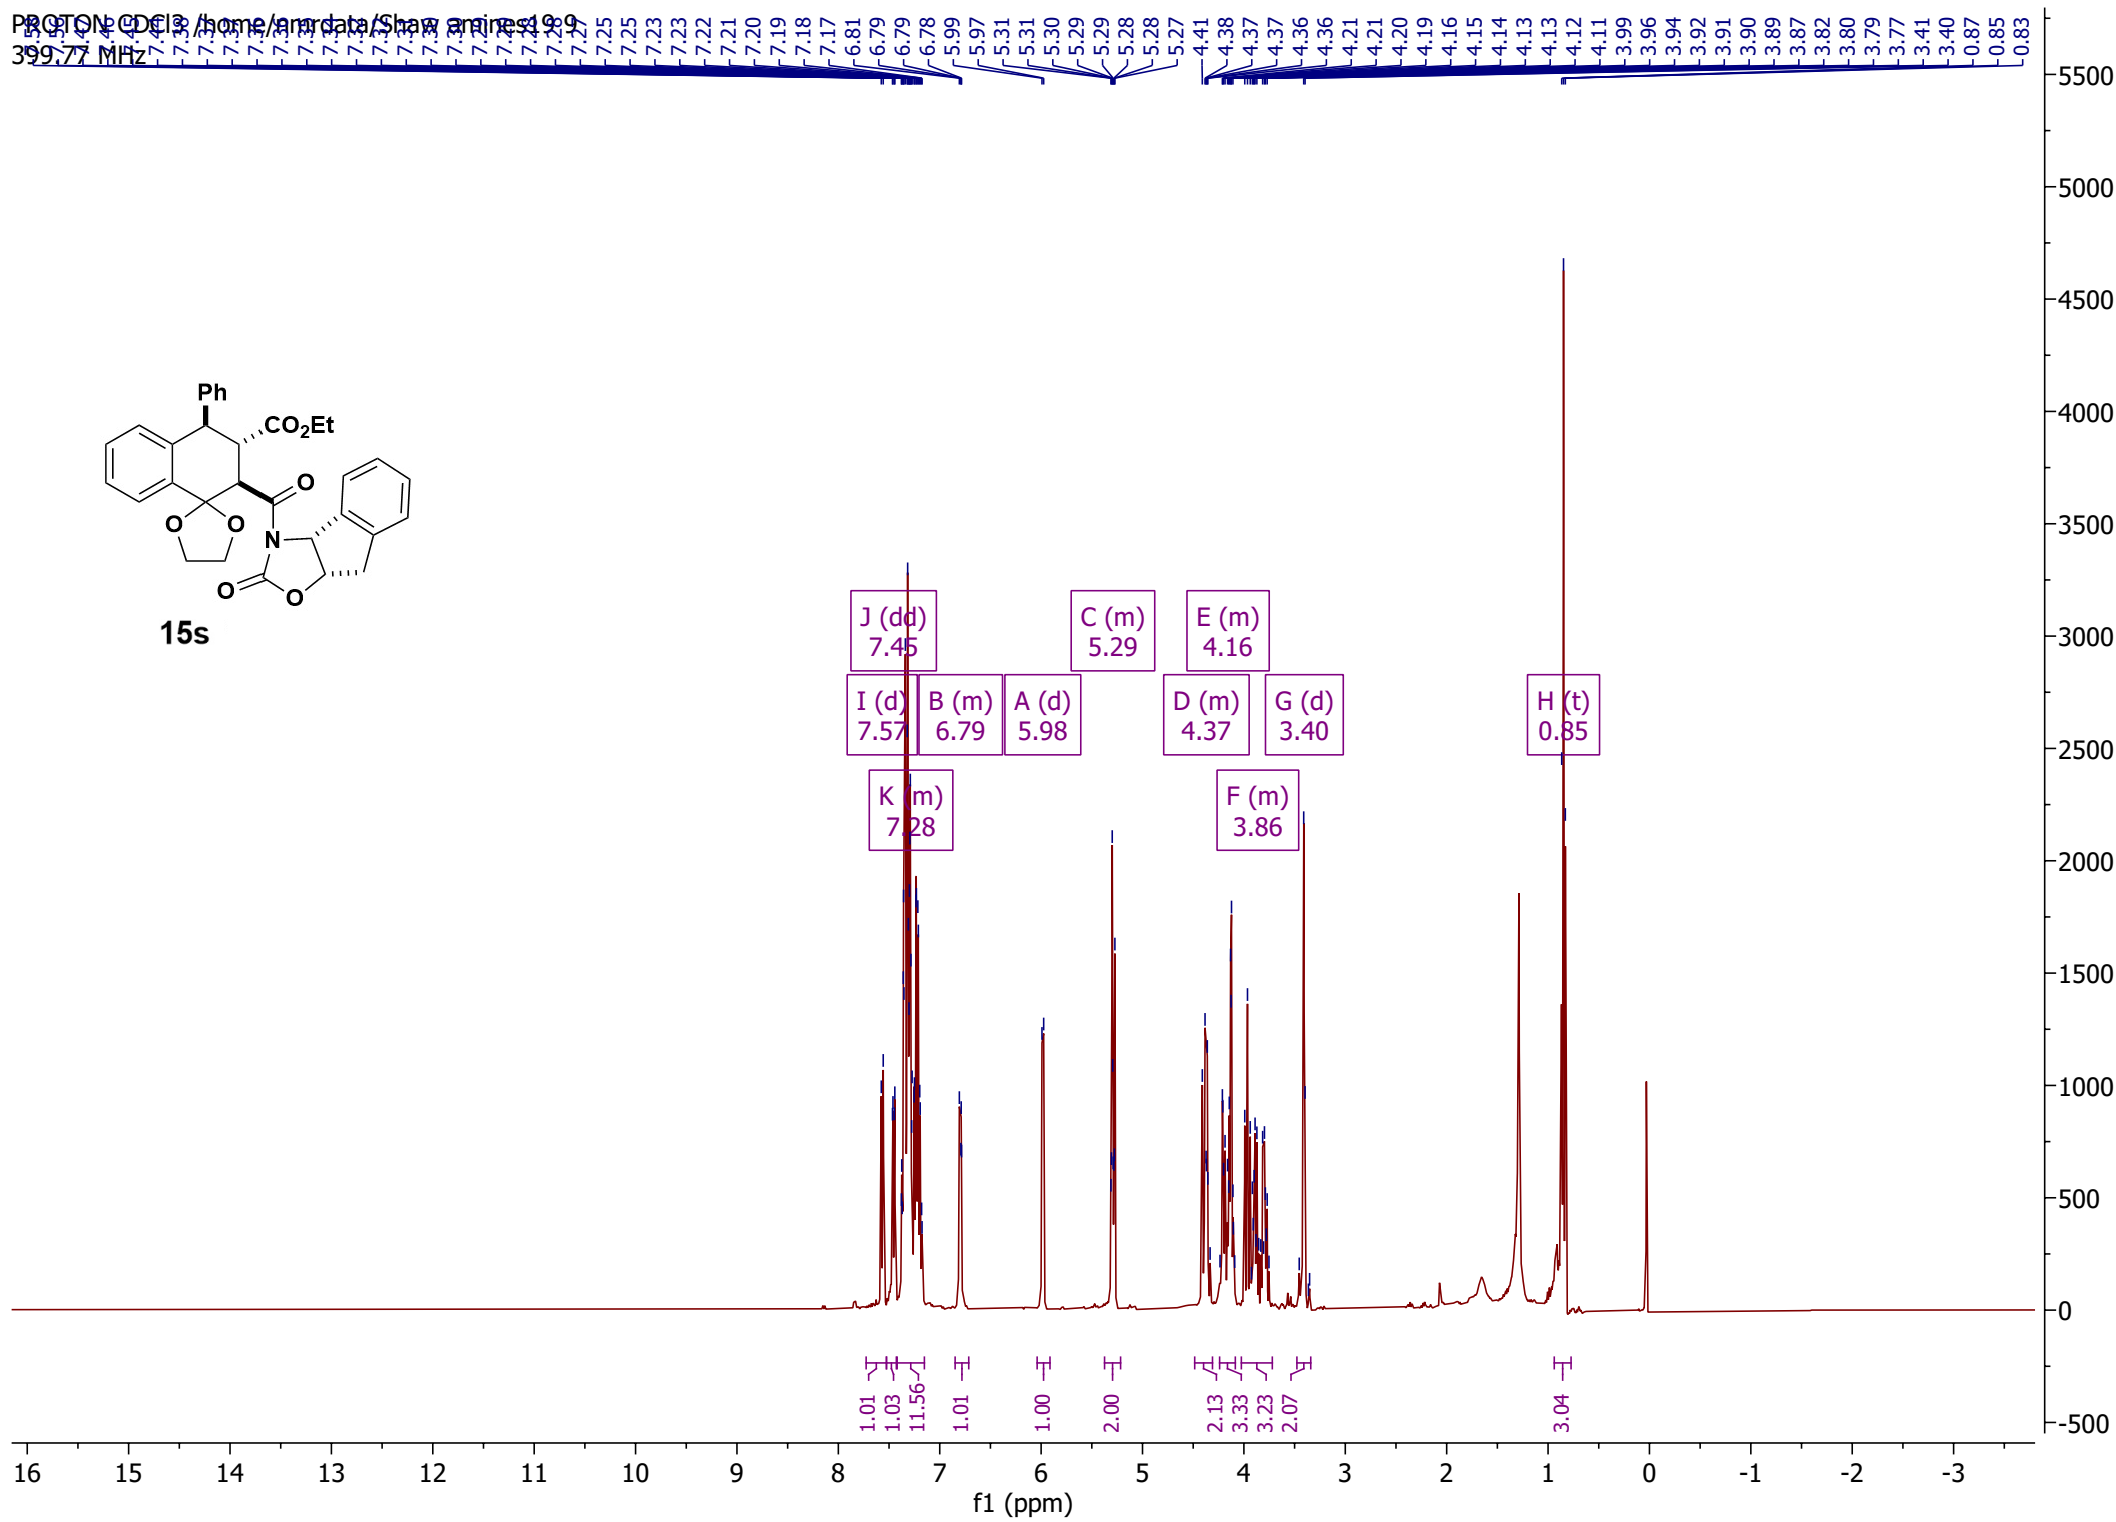

C13CPD CDCl3 /home/nmrdata/Shaw amines19 9  
100.53 MHz

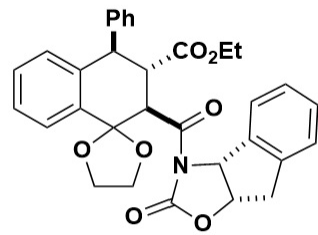

15s

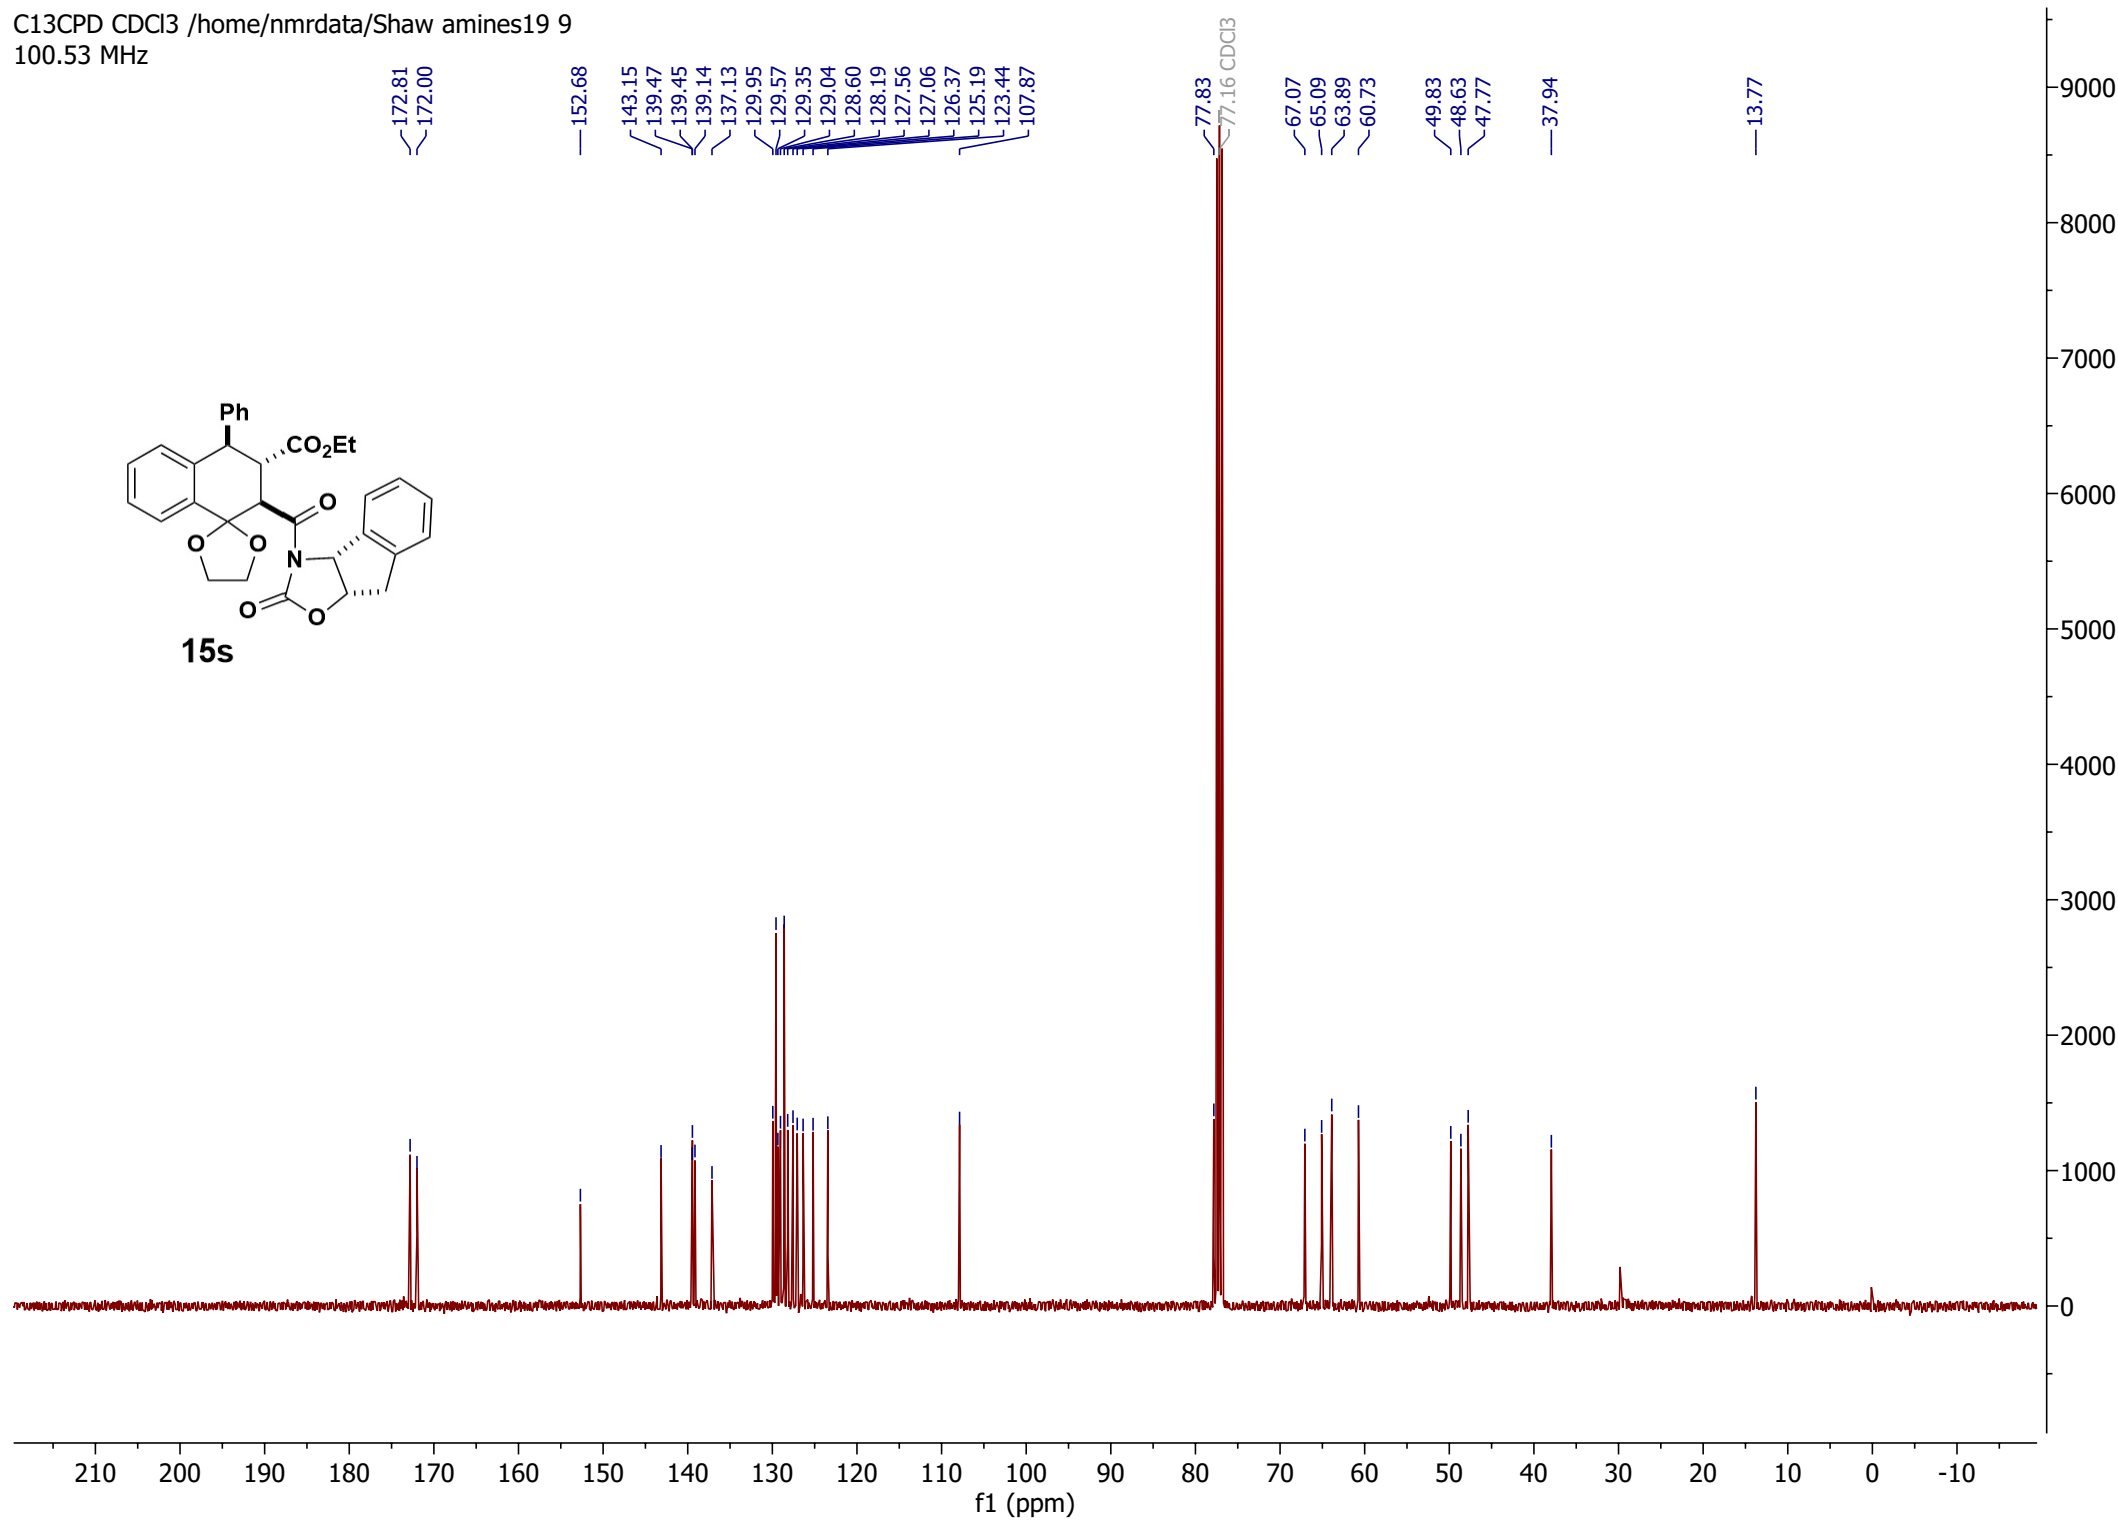

PROTON CDCl3  
399.77 MHz

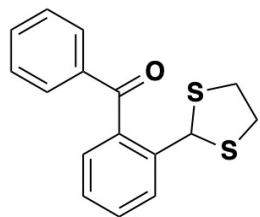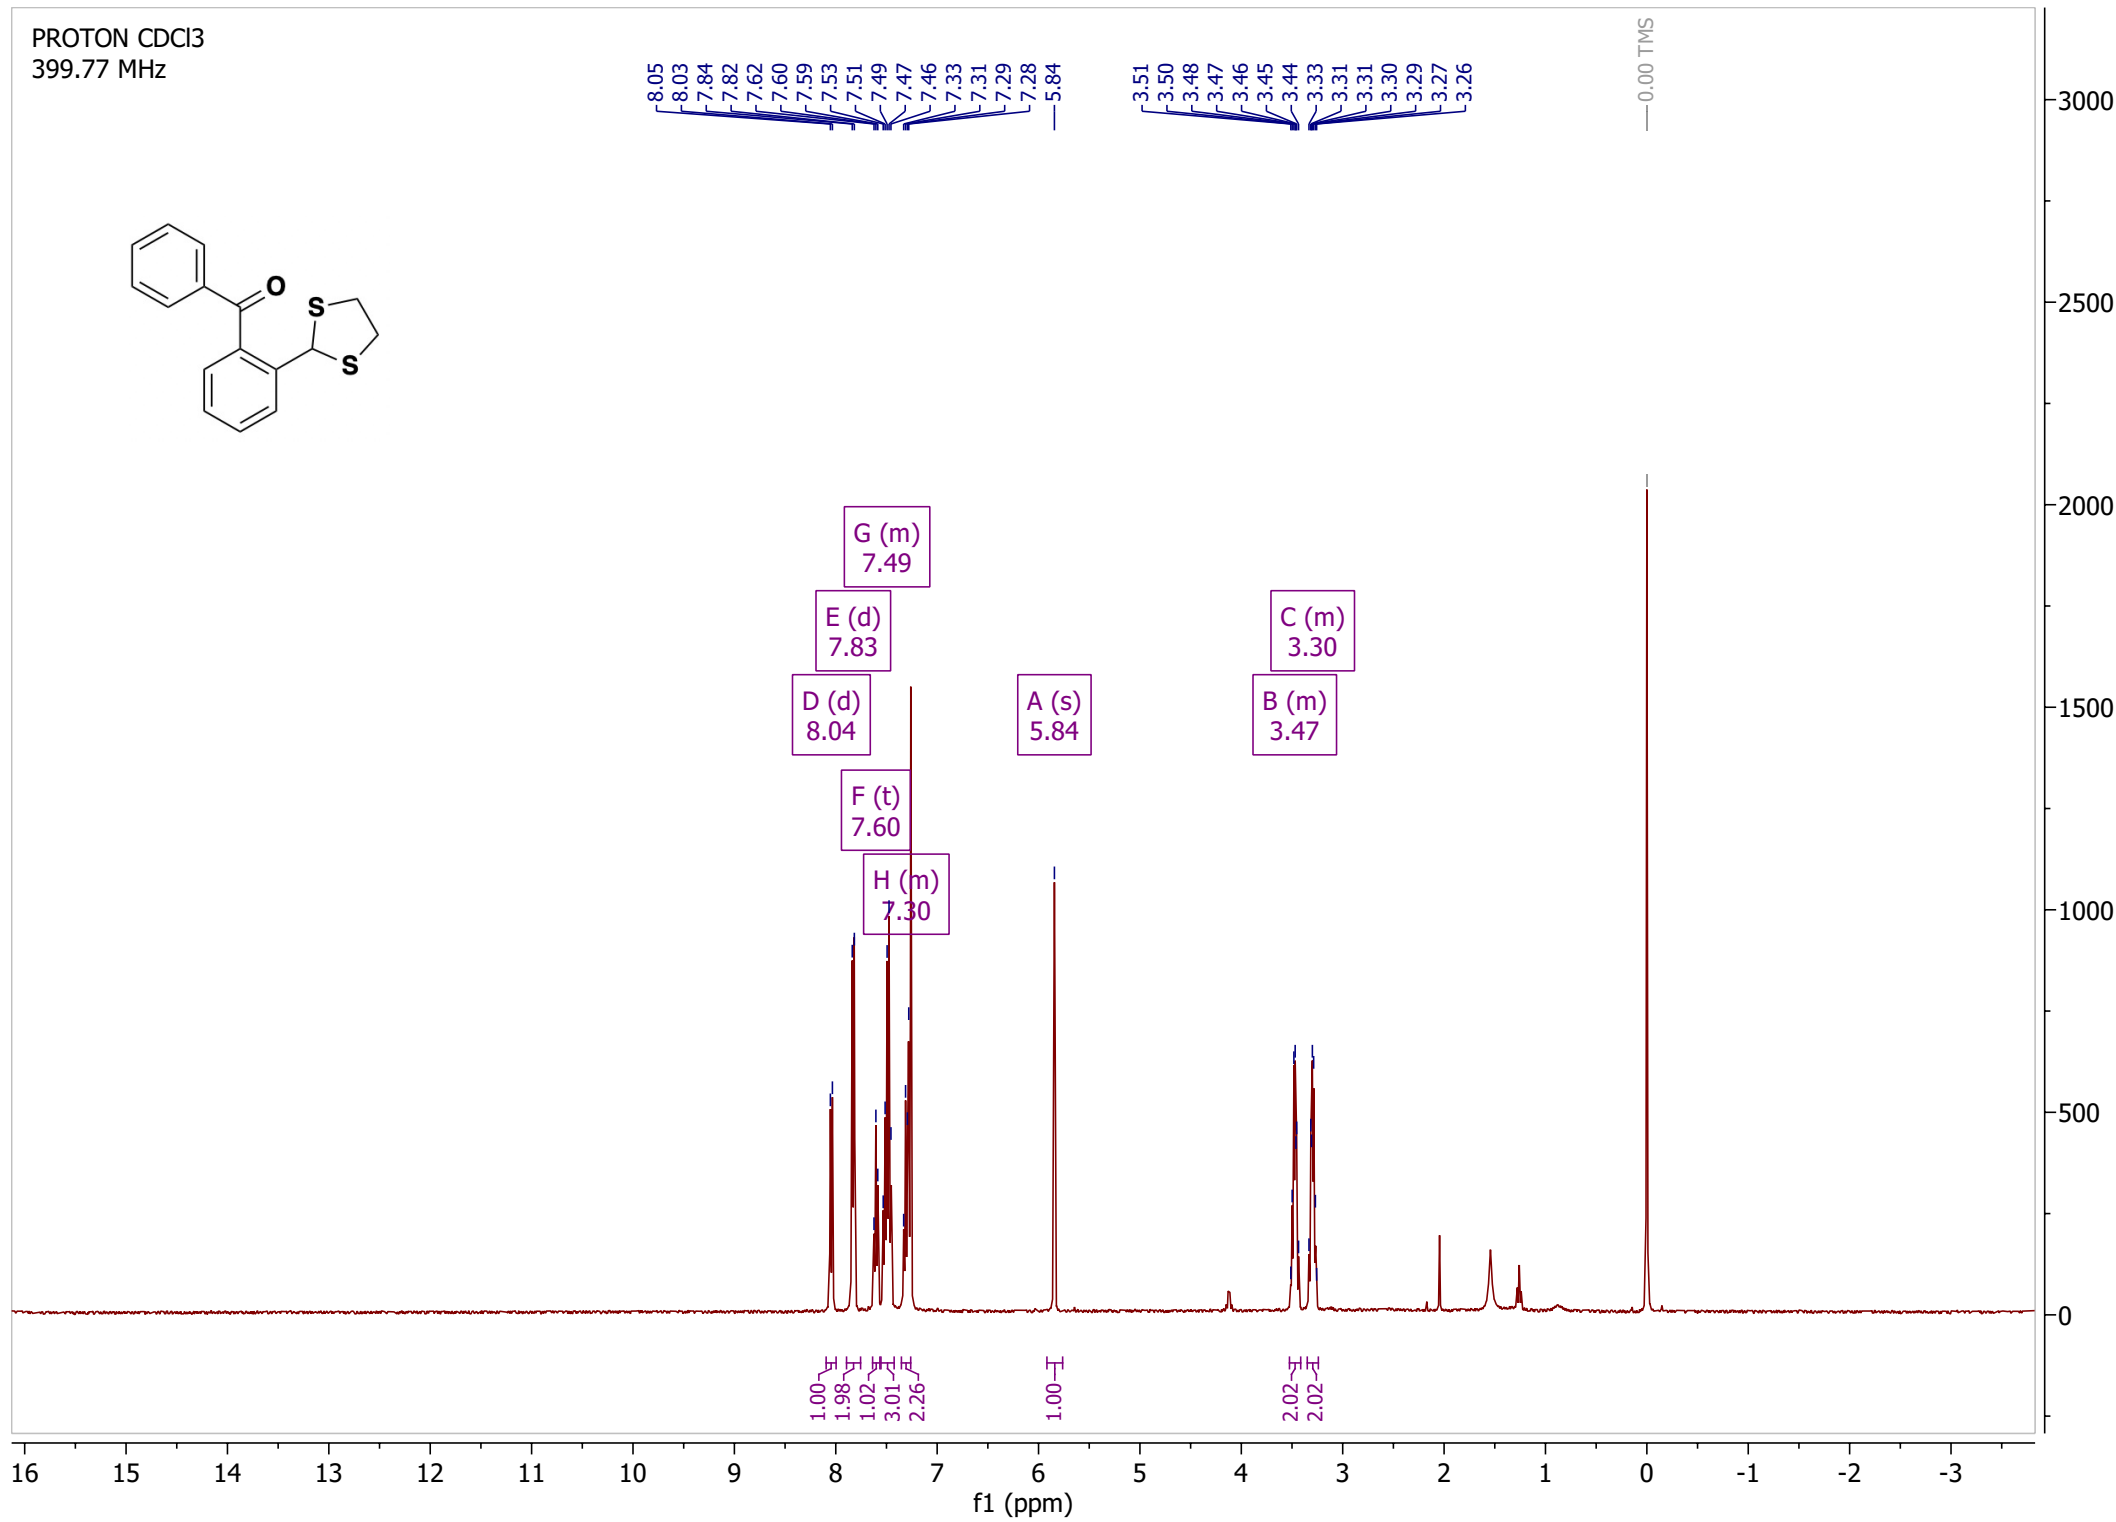

C13CPD CDCl3  
100.53 MHz



197.79

140.53  
138.15  
137.58  
133.61  
130.98  
130.60  
129.46  
128.63  
128.60  
127.18

52.45

40.41

77.16

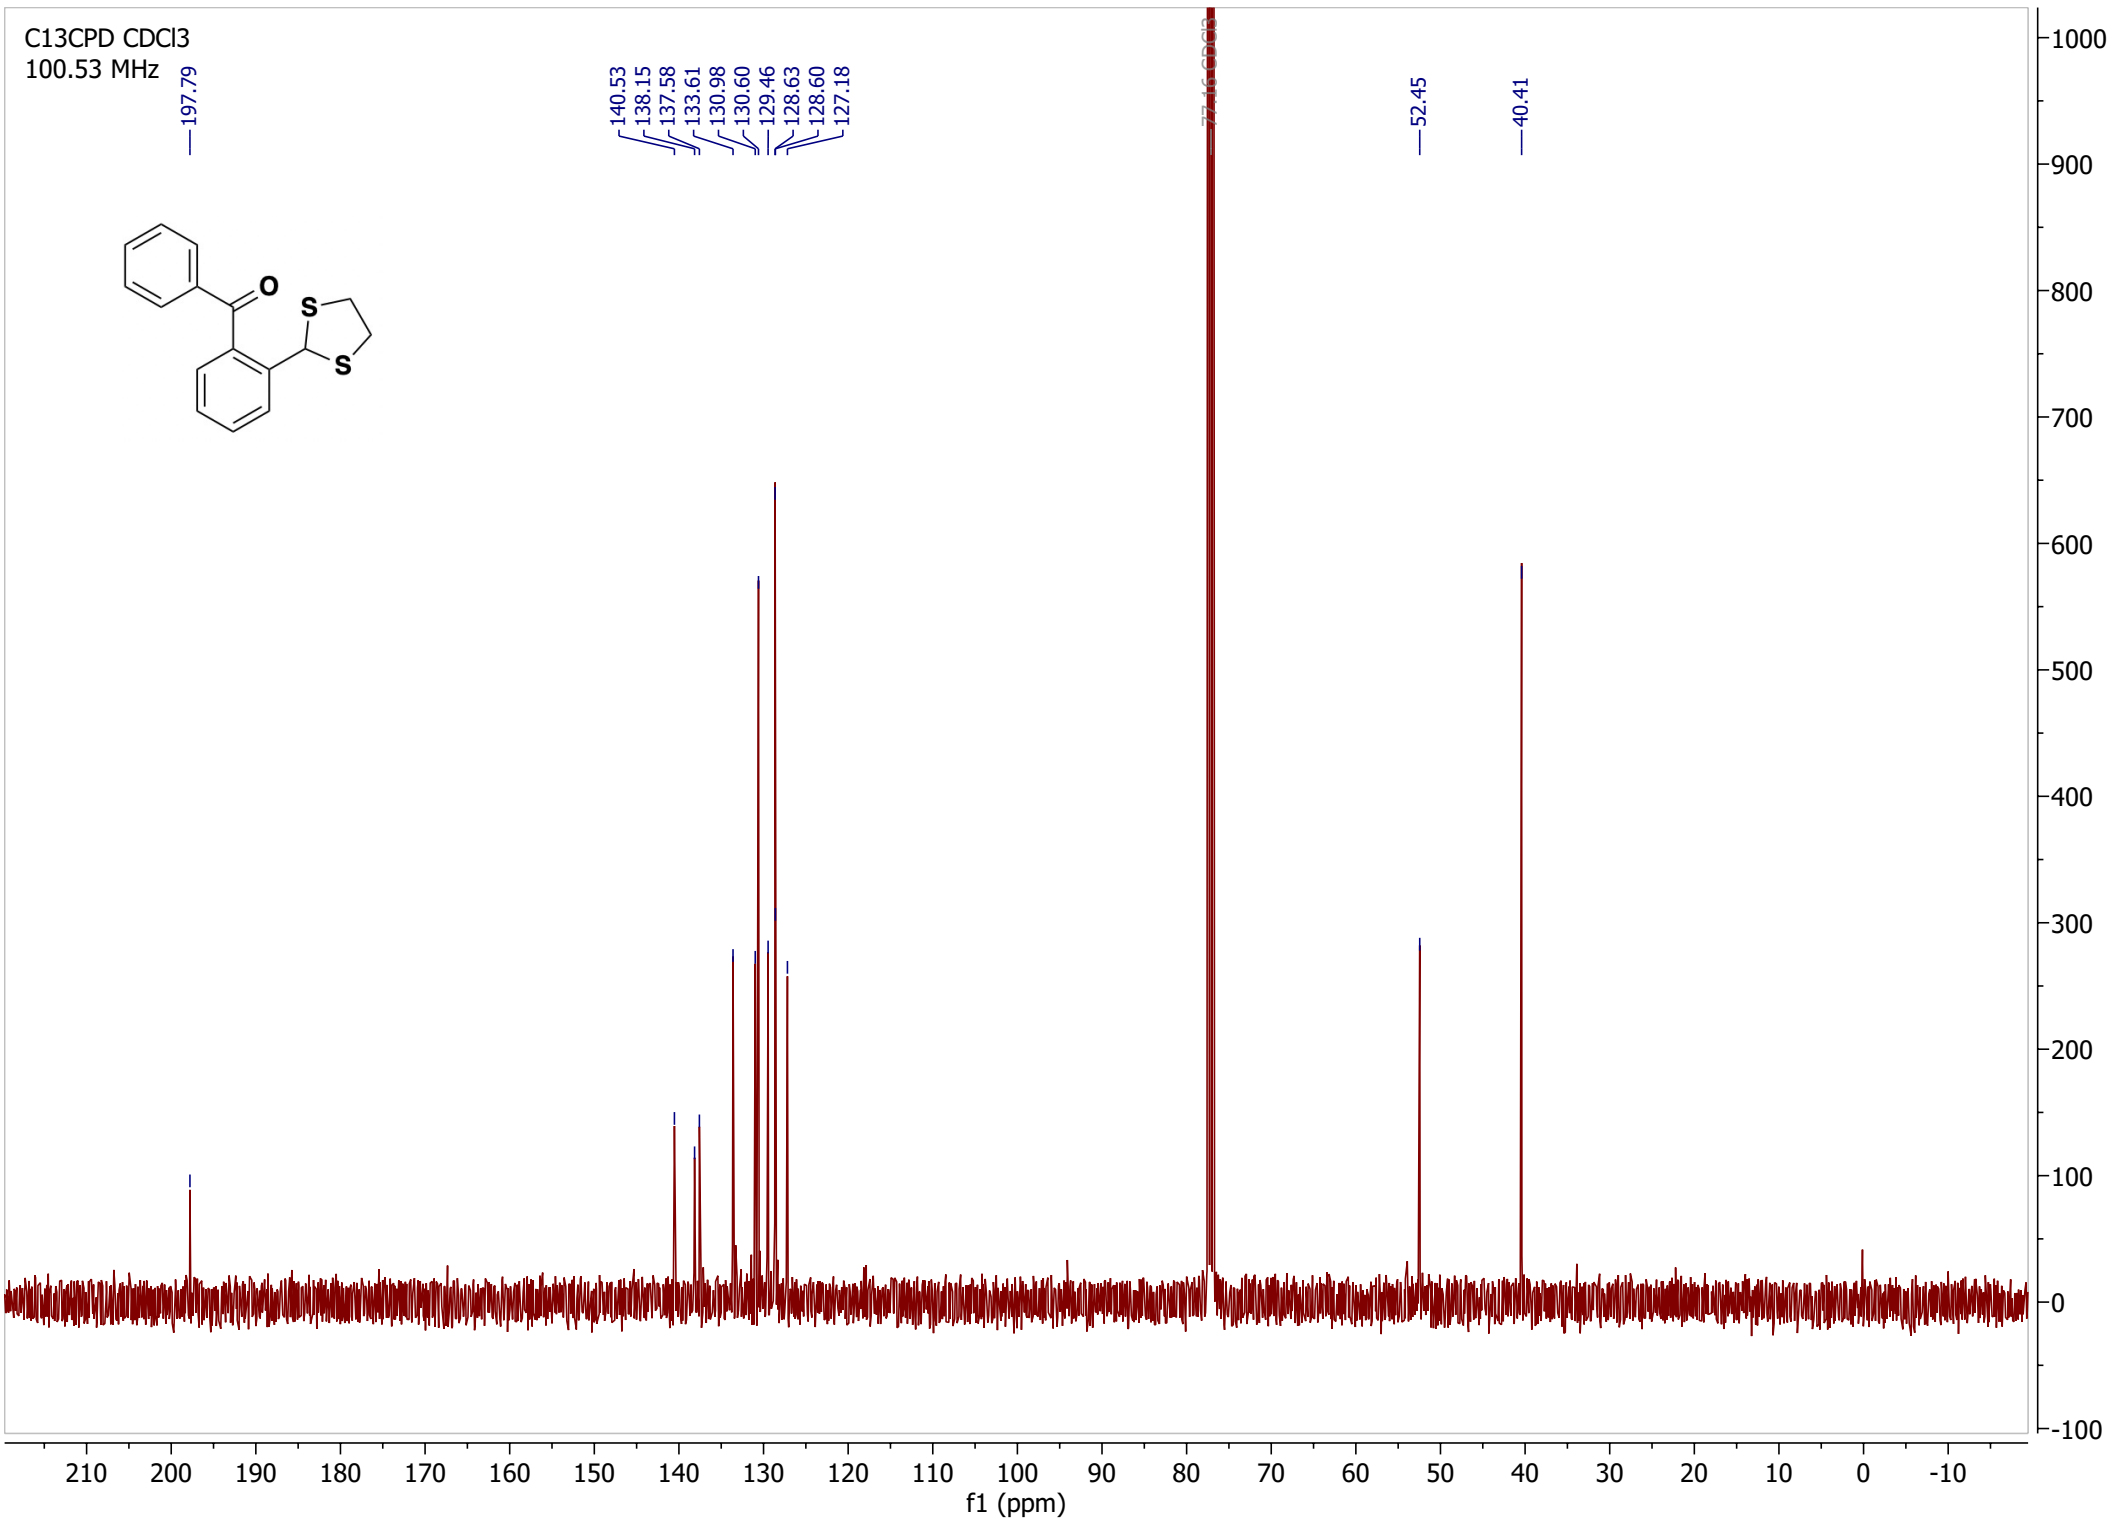

PROTON CDCl3  
399.77 MHz

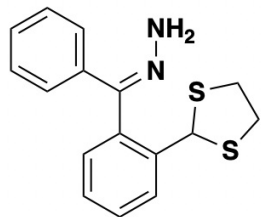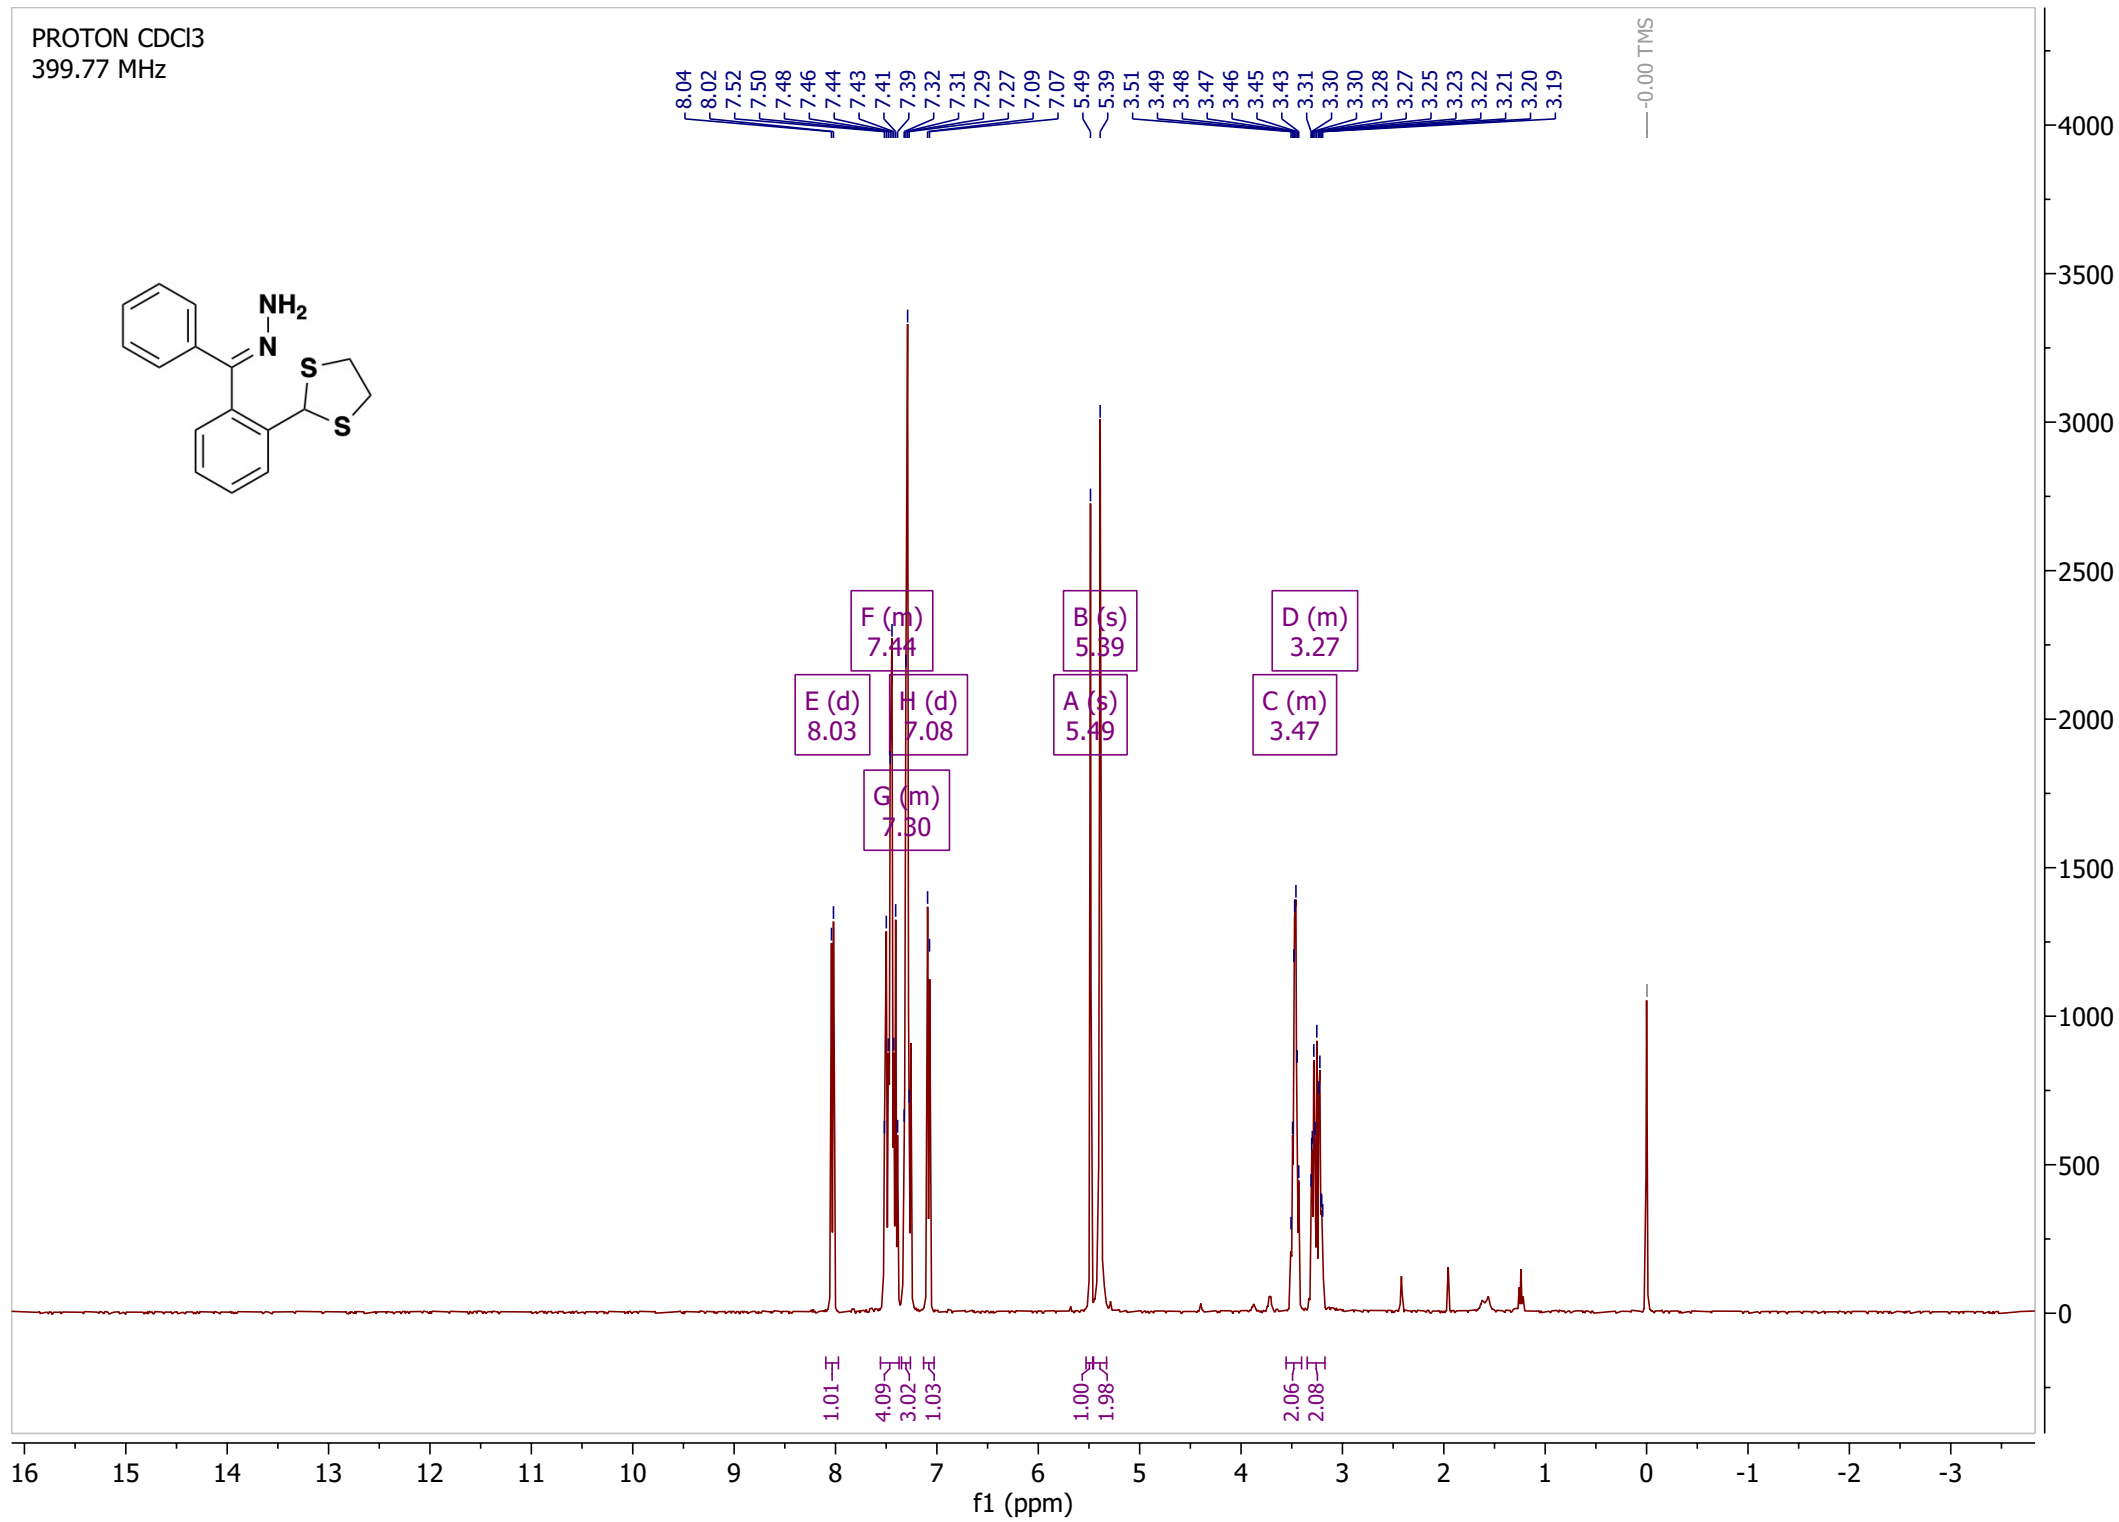

C13CPD CD2Cl2  
100.53 MHz

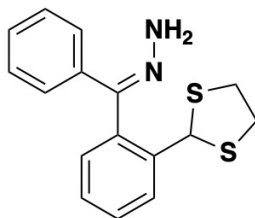

147.11  
140.83  
138.41  
132.32  
130.15  
129.99  
129.32  
128.94  
128.60  
128.48  
126.30

53.84 CD2Cl2

52.37

40.86

40.72

210 200 190 180 170 160 150 140 130 120 110 100 90 80 70 60 50 40 30 20 10 0 -10

f1 (ppm)

13000  
12000  
11000  
10000  
9000  
8000  
7000  
6000  
5000  
4000  
3000  
2000  
1000  
0  
-1000



PROTON CDCl3  
399.77 MHz

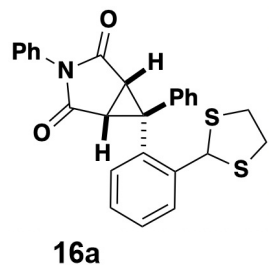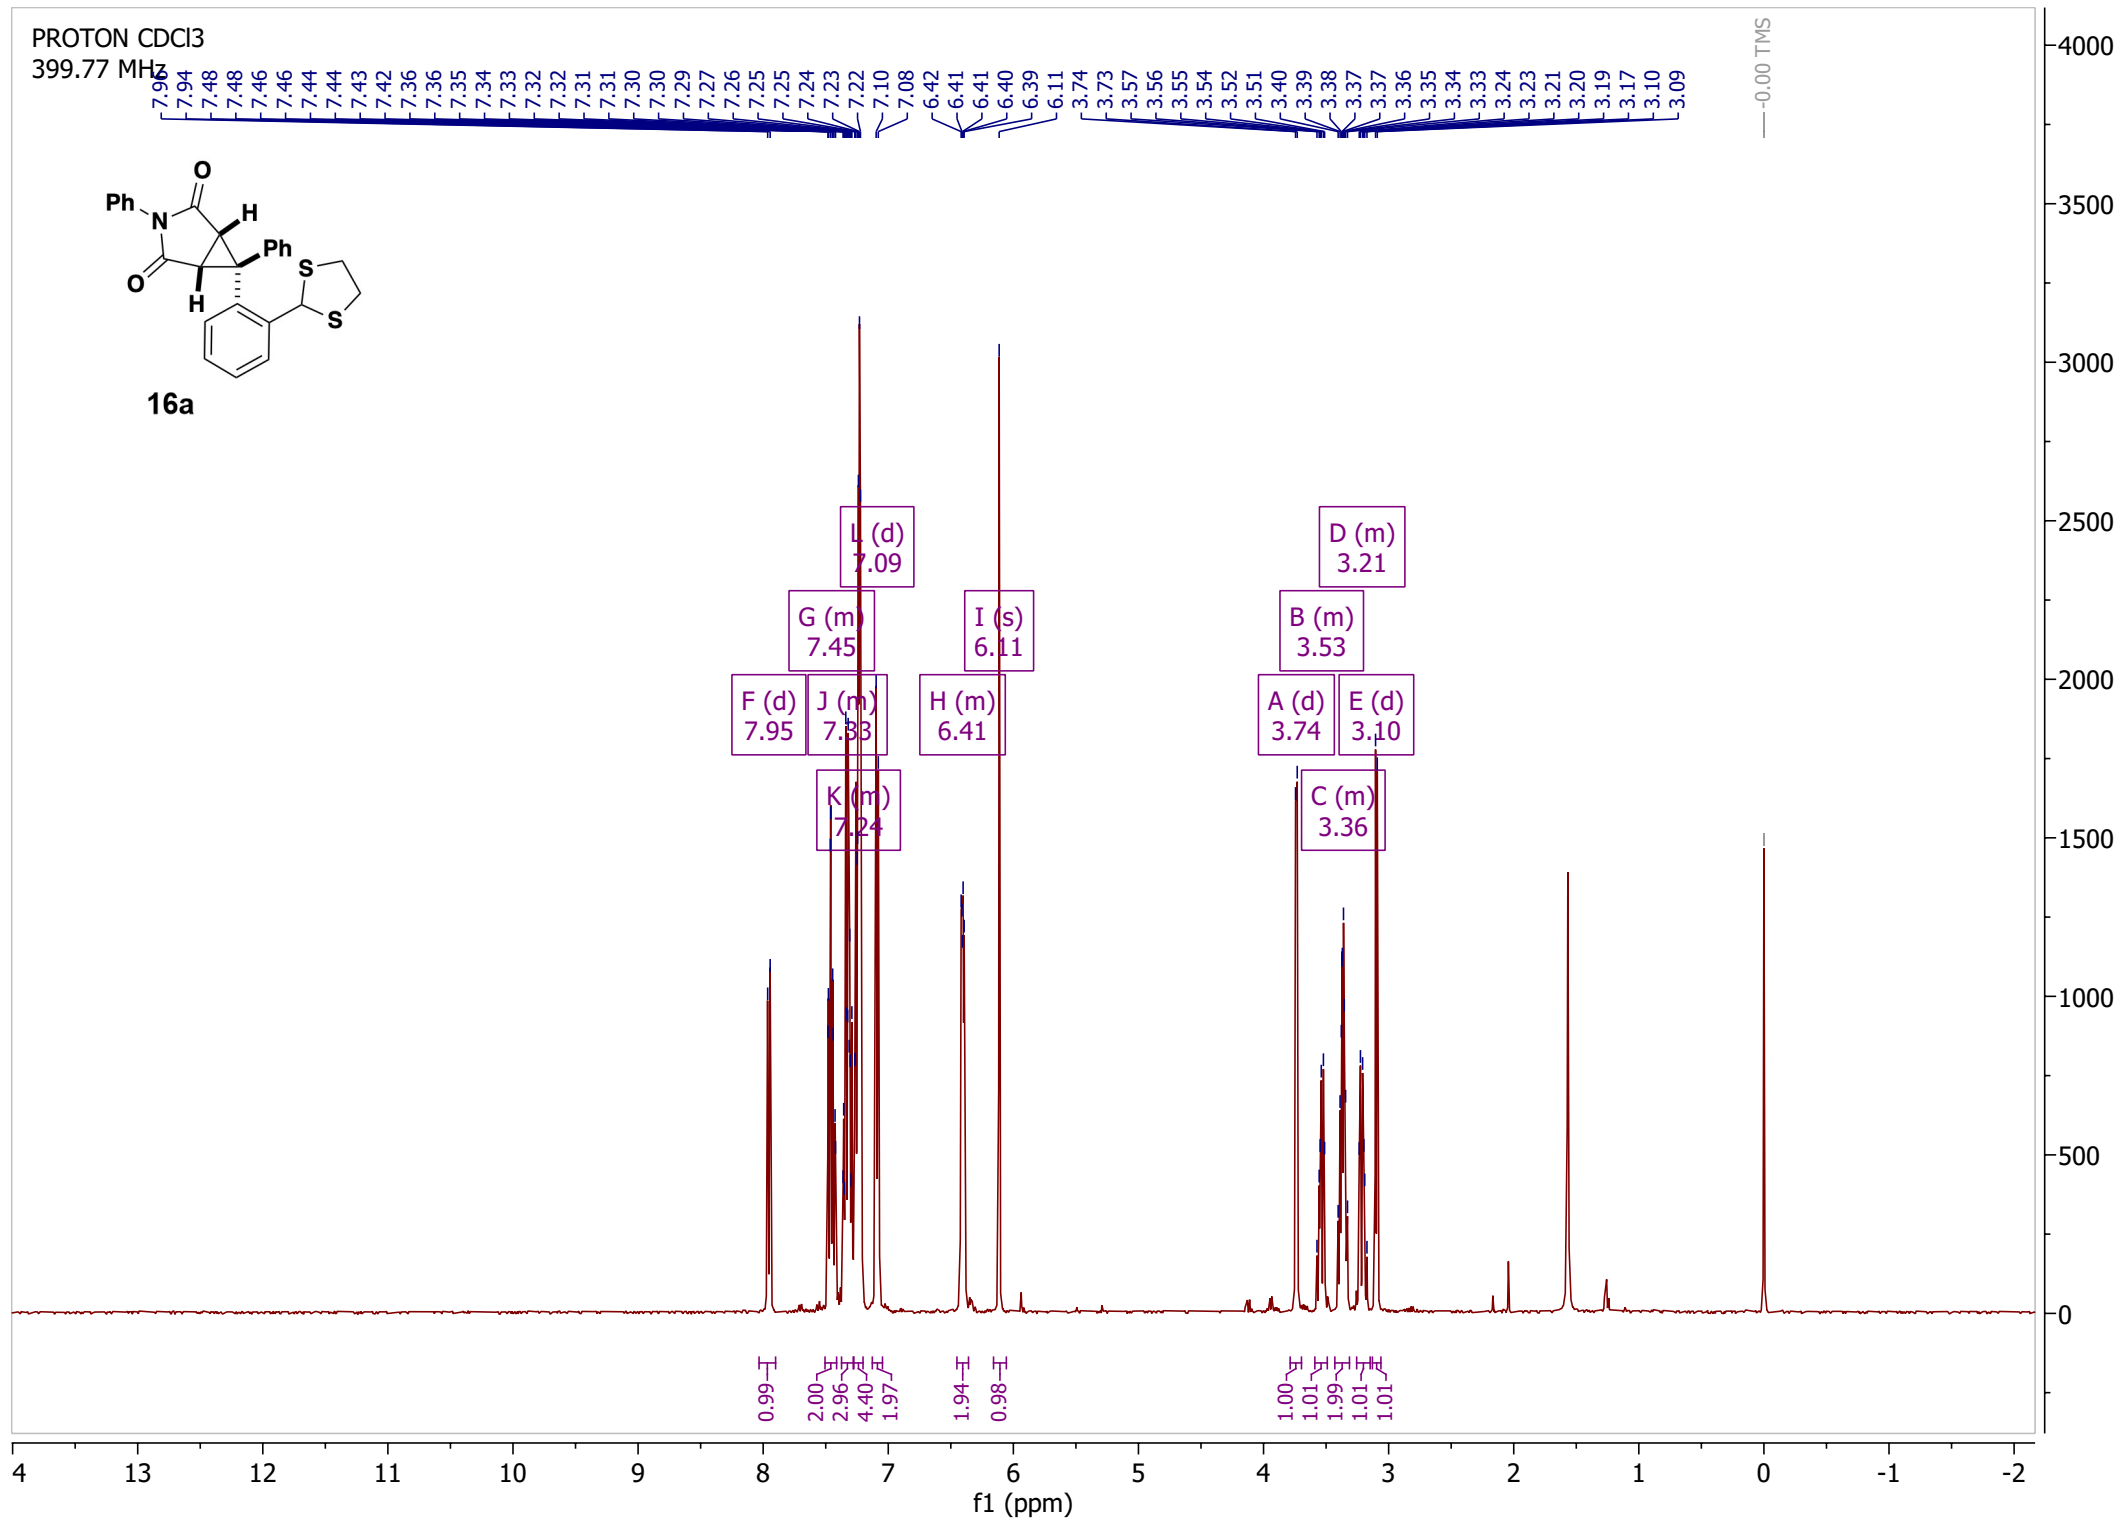

C13CPD CDCl3  
100.53 MHz

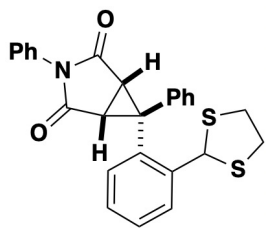

16a

171.81  
171.42

144.01  
139.59  
132.51  
131.31  
131.16  
130.62  
129.77  
129.09  
129.07  
128.62  
128.46  
128.19  
126.63  
126.44

77.16  
77.06  
76.96  
50.66  
47.07  
41.07  
40.74  
36.46  
34.61

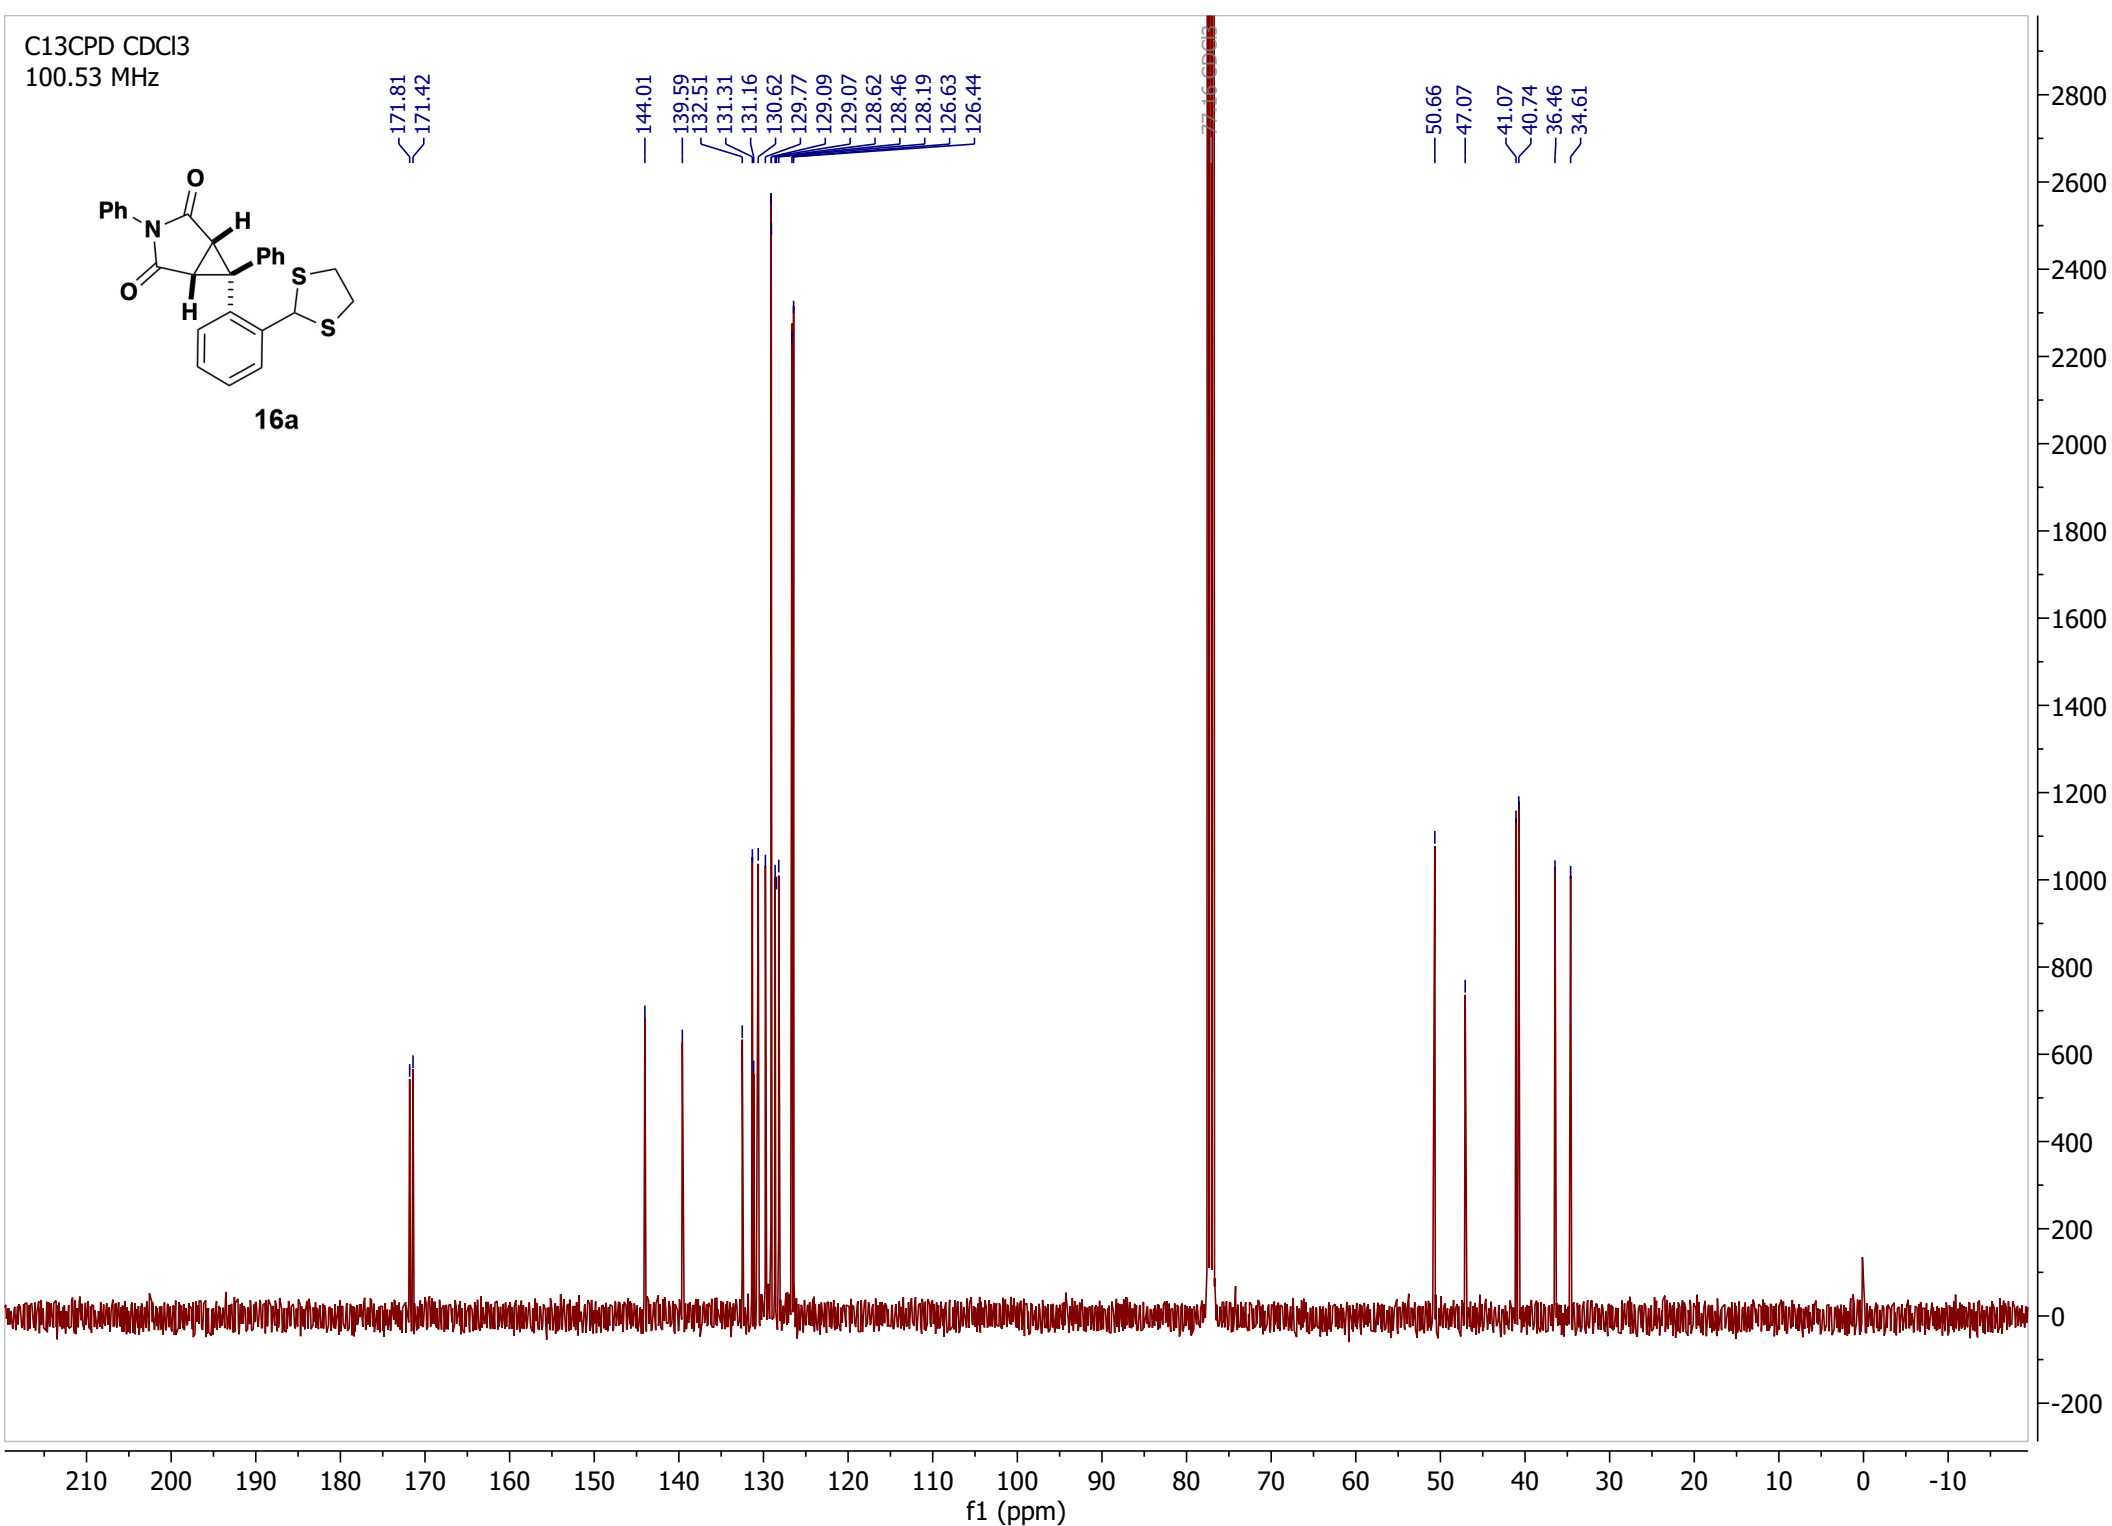

PROTON CDCl3

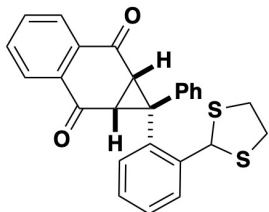

16b

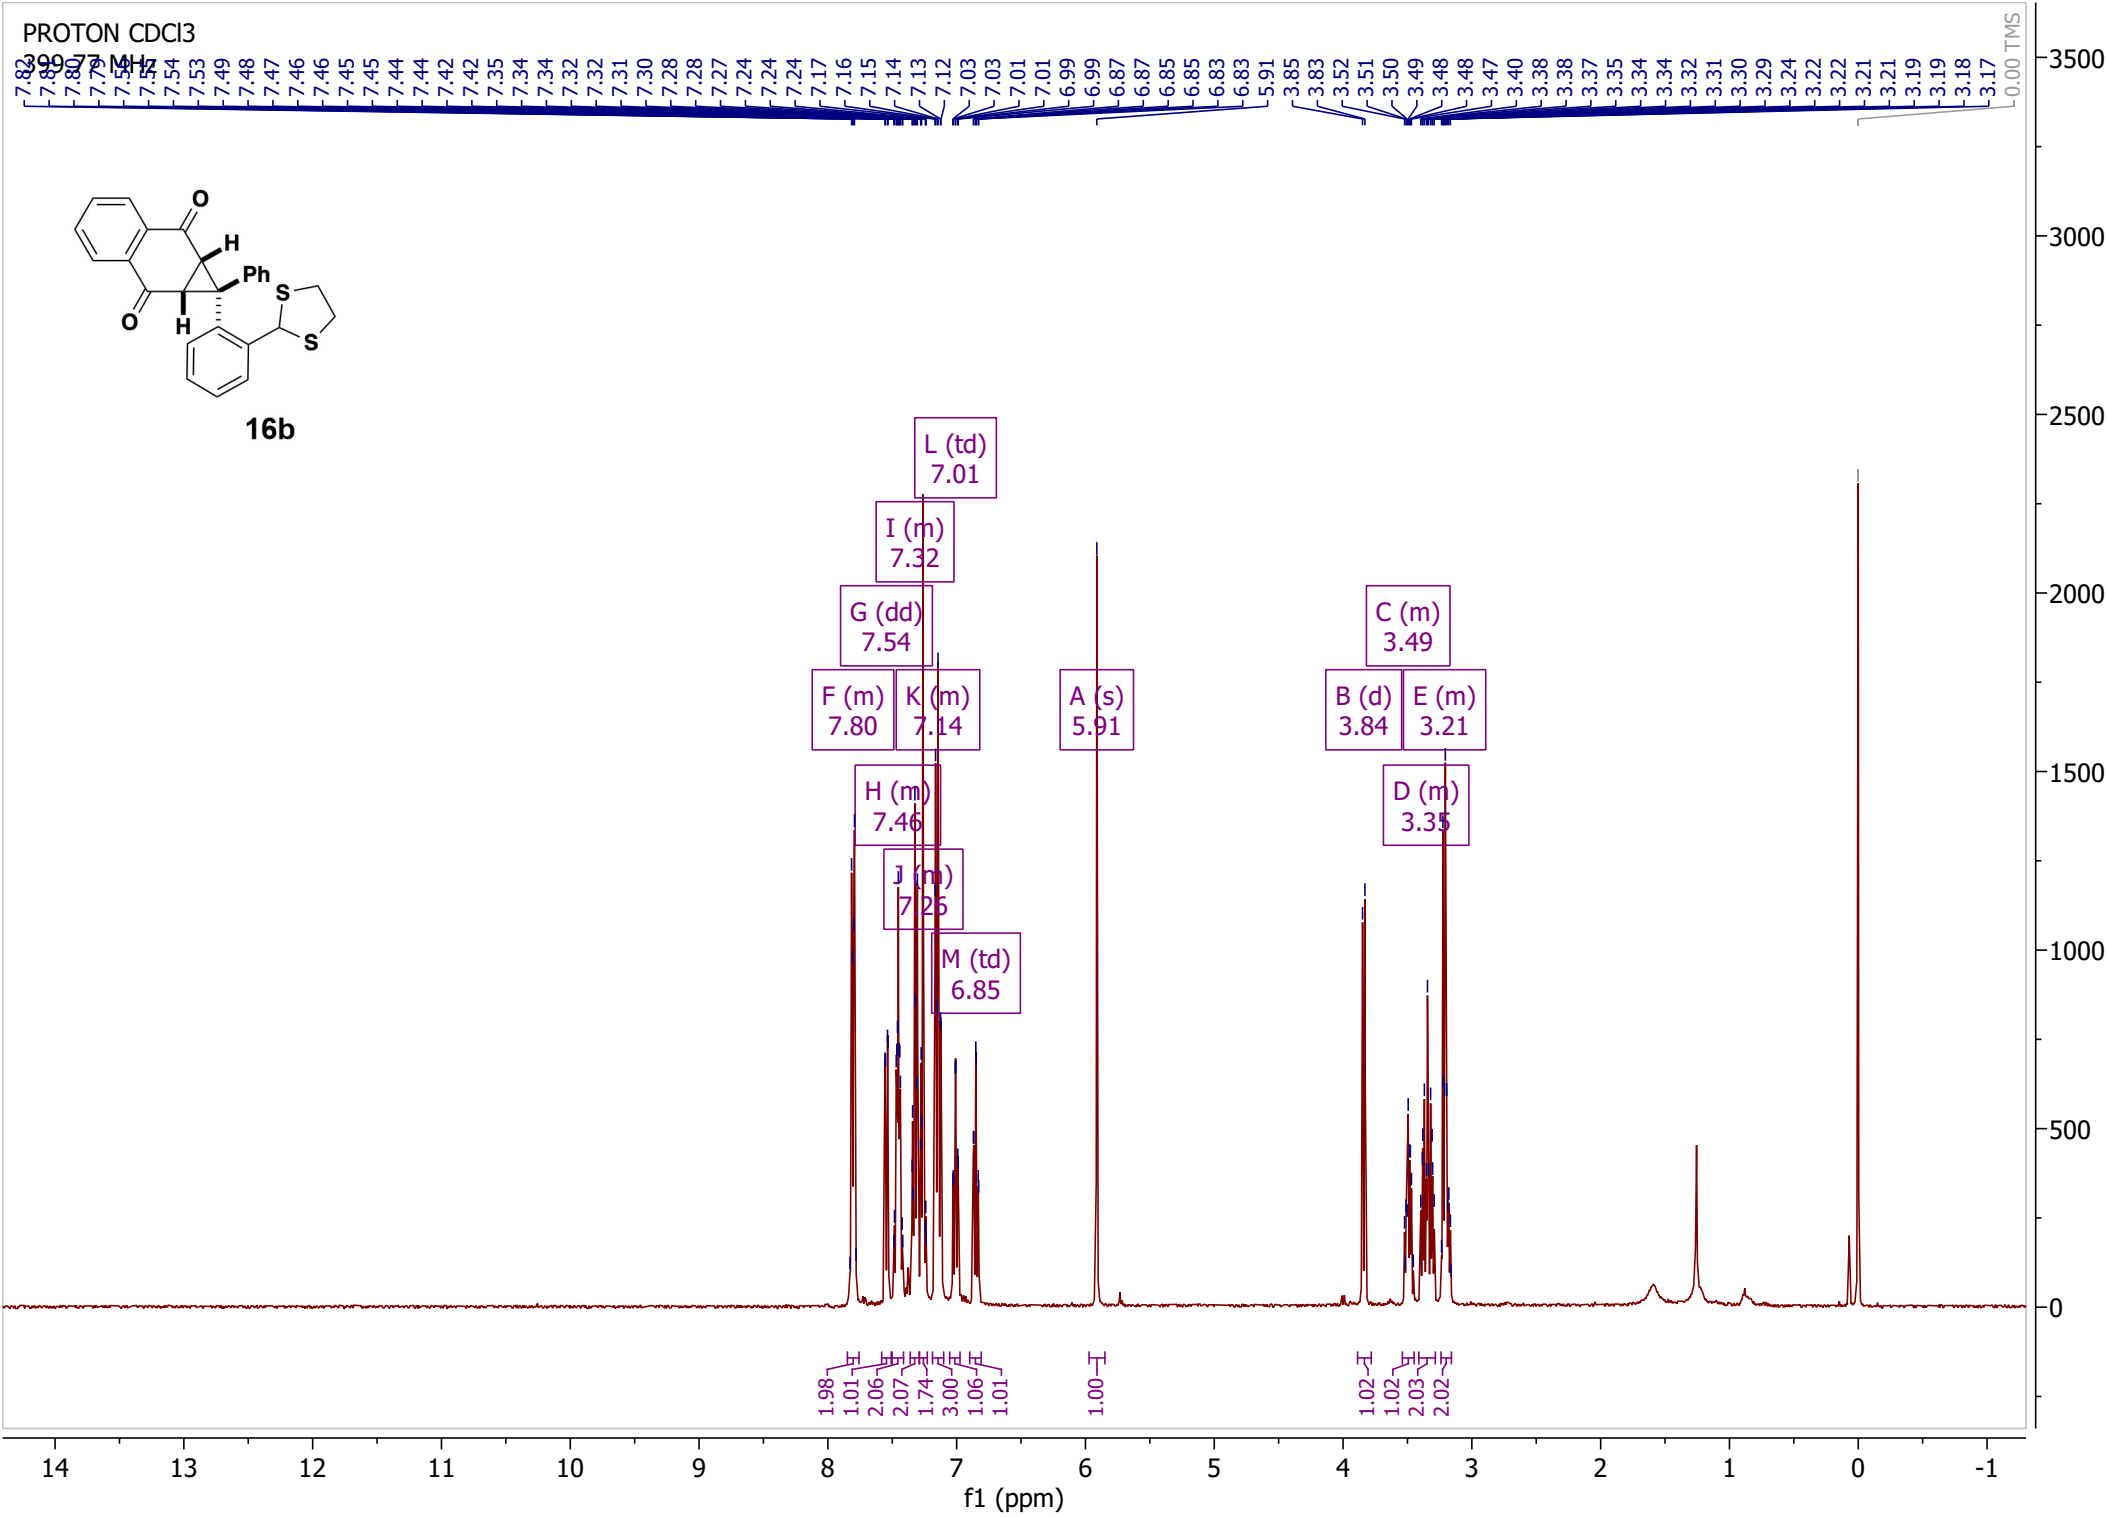

C13CPD CDCl3  
100.53 MHz

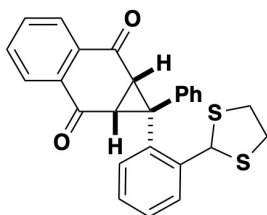

16b

192.15  
191.55

142.97  
141.67  
134.84  
133.90  
133.77  
133.75  
132.63  
131.40  
131.02  
128.99  
128.93  
127.86  
127.53  
126.77  
126.13

51.15  
45.81  
42.61  
40.96  
40.59  
40.53

77.16  
77.06  
76.96

210 200 190 180 170 160 150 140 130 120 110 100 90 80 70 60 50 40 30 20 10 0 -10

f1 (ppm)

10000  
9000  
8000  
7000  
6000  
5000  
4000  
3000  
2000  
1000  
0  
-1000

PROTON CDCl3  
399.77 MHz

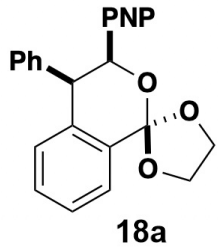

8.03  
8.01  
7.60  
7.59  
7.58  
7.57  
7.38  
7.37  
7.36  
7.35  
7.34  
7.33  
7.33  
7.32  
7.31  
7.30  
7.29  
7.22  
7.20  
7.07  
7.07  
7.05  
7.05  
7.04  
7.03  
7.02  
7.01  
7.01  
7.00  
7.00  
6.77  
6.77  
6.75  
6.75  
5.73  
5.72  
4.52  
4.51  
4.51  
4.49  
4.49  
4.48  
4.40  
4.38  
4.36  
4.35  
4.30  
4.28  
4.28  
4.27  
4.26  
4.25  
4.20  
4.18  
4.16  
4.14  
4.13

— 0.00 TMS

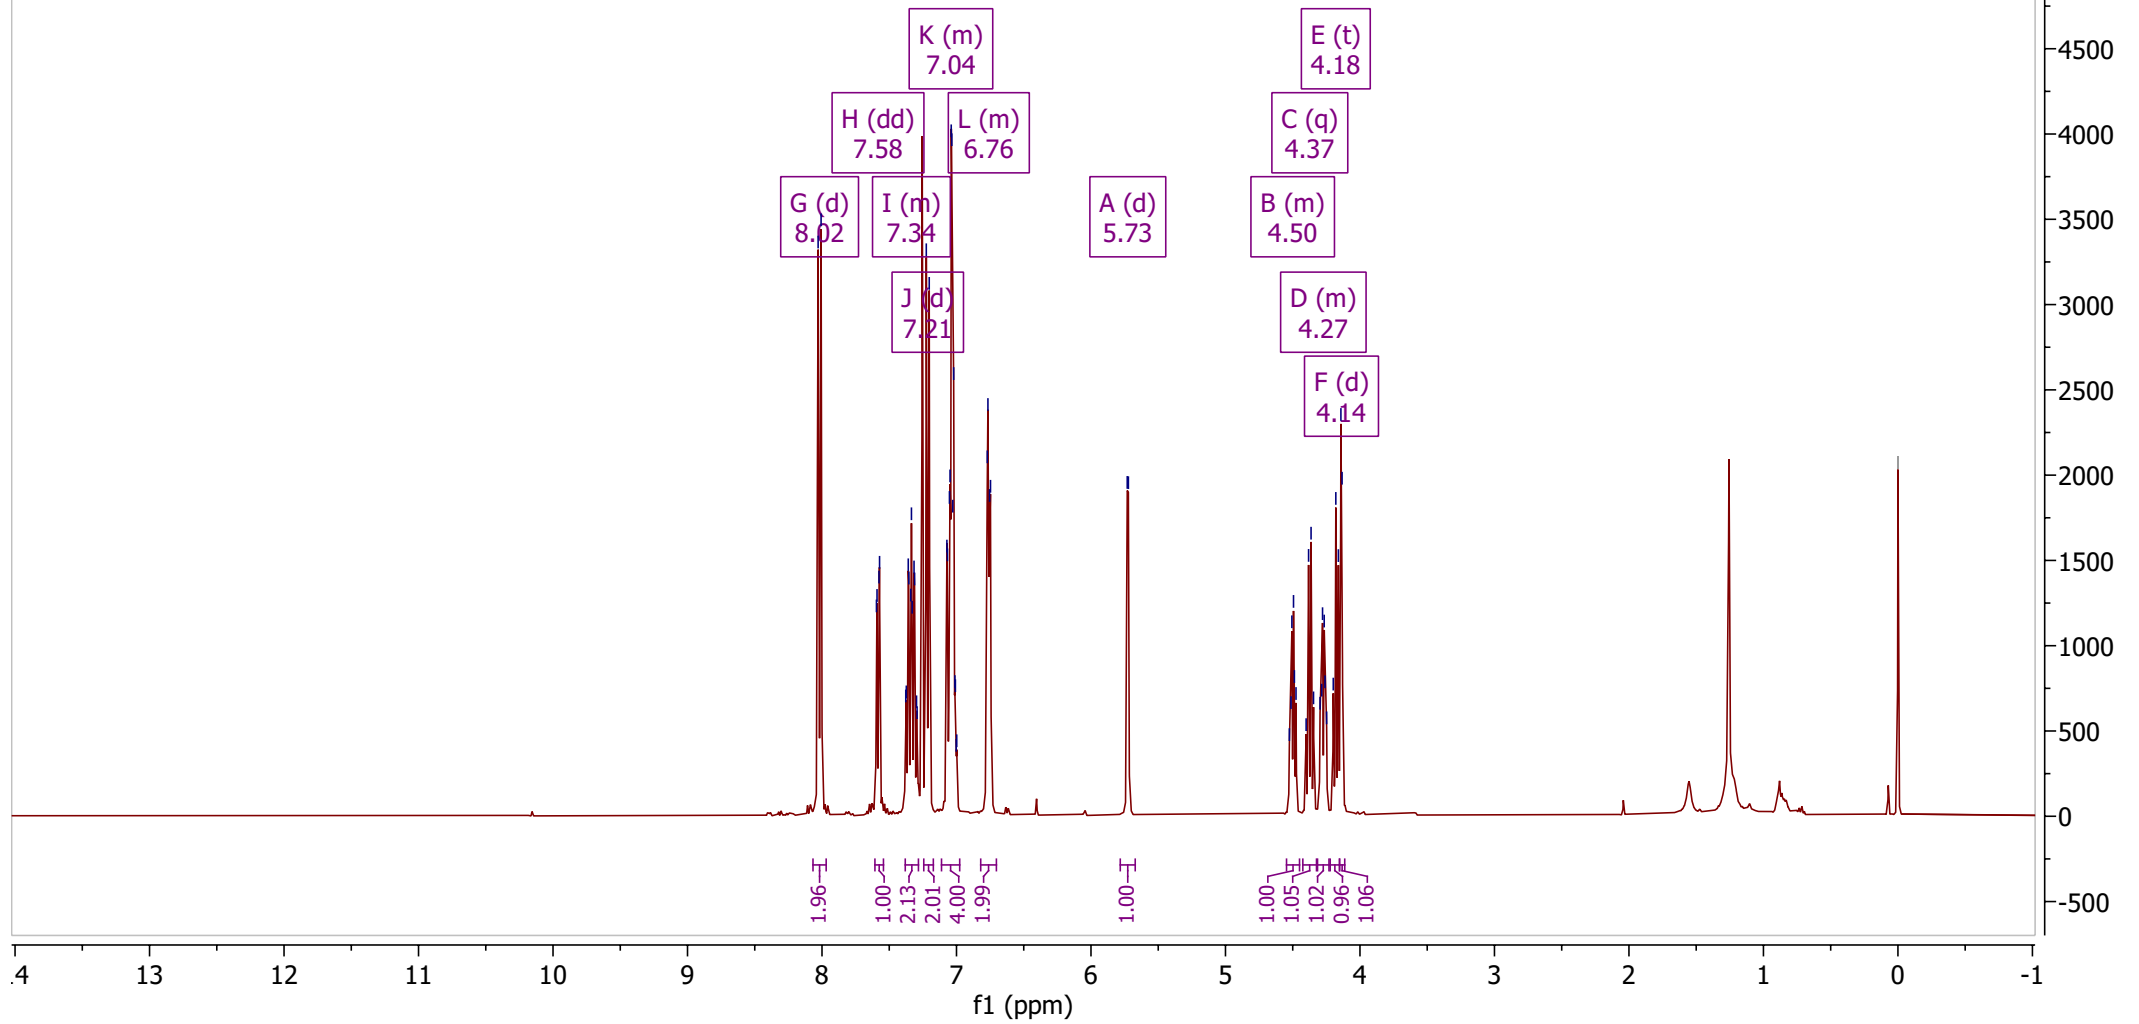

C13CPD CDCl3  
100.53 MHz

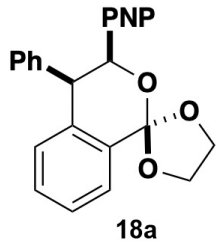

147.08  
147.05  
139.09  
138.55  
131.84  
130.14  
129.95  
129.26  
127.96  
127.58  
126.99  
126.90  
123.12  
119.40

77.16 CDCl3  
75.90

66.42  
64.36

50.00

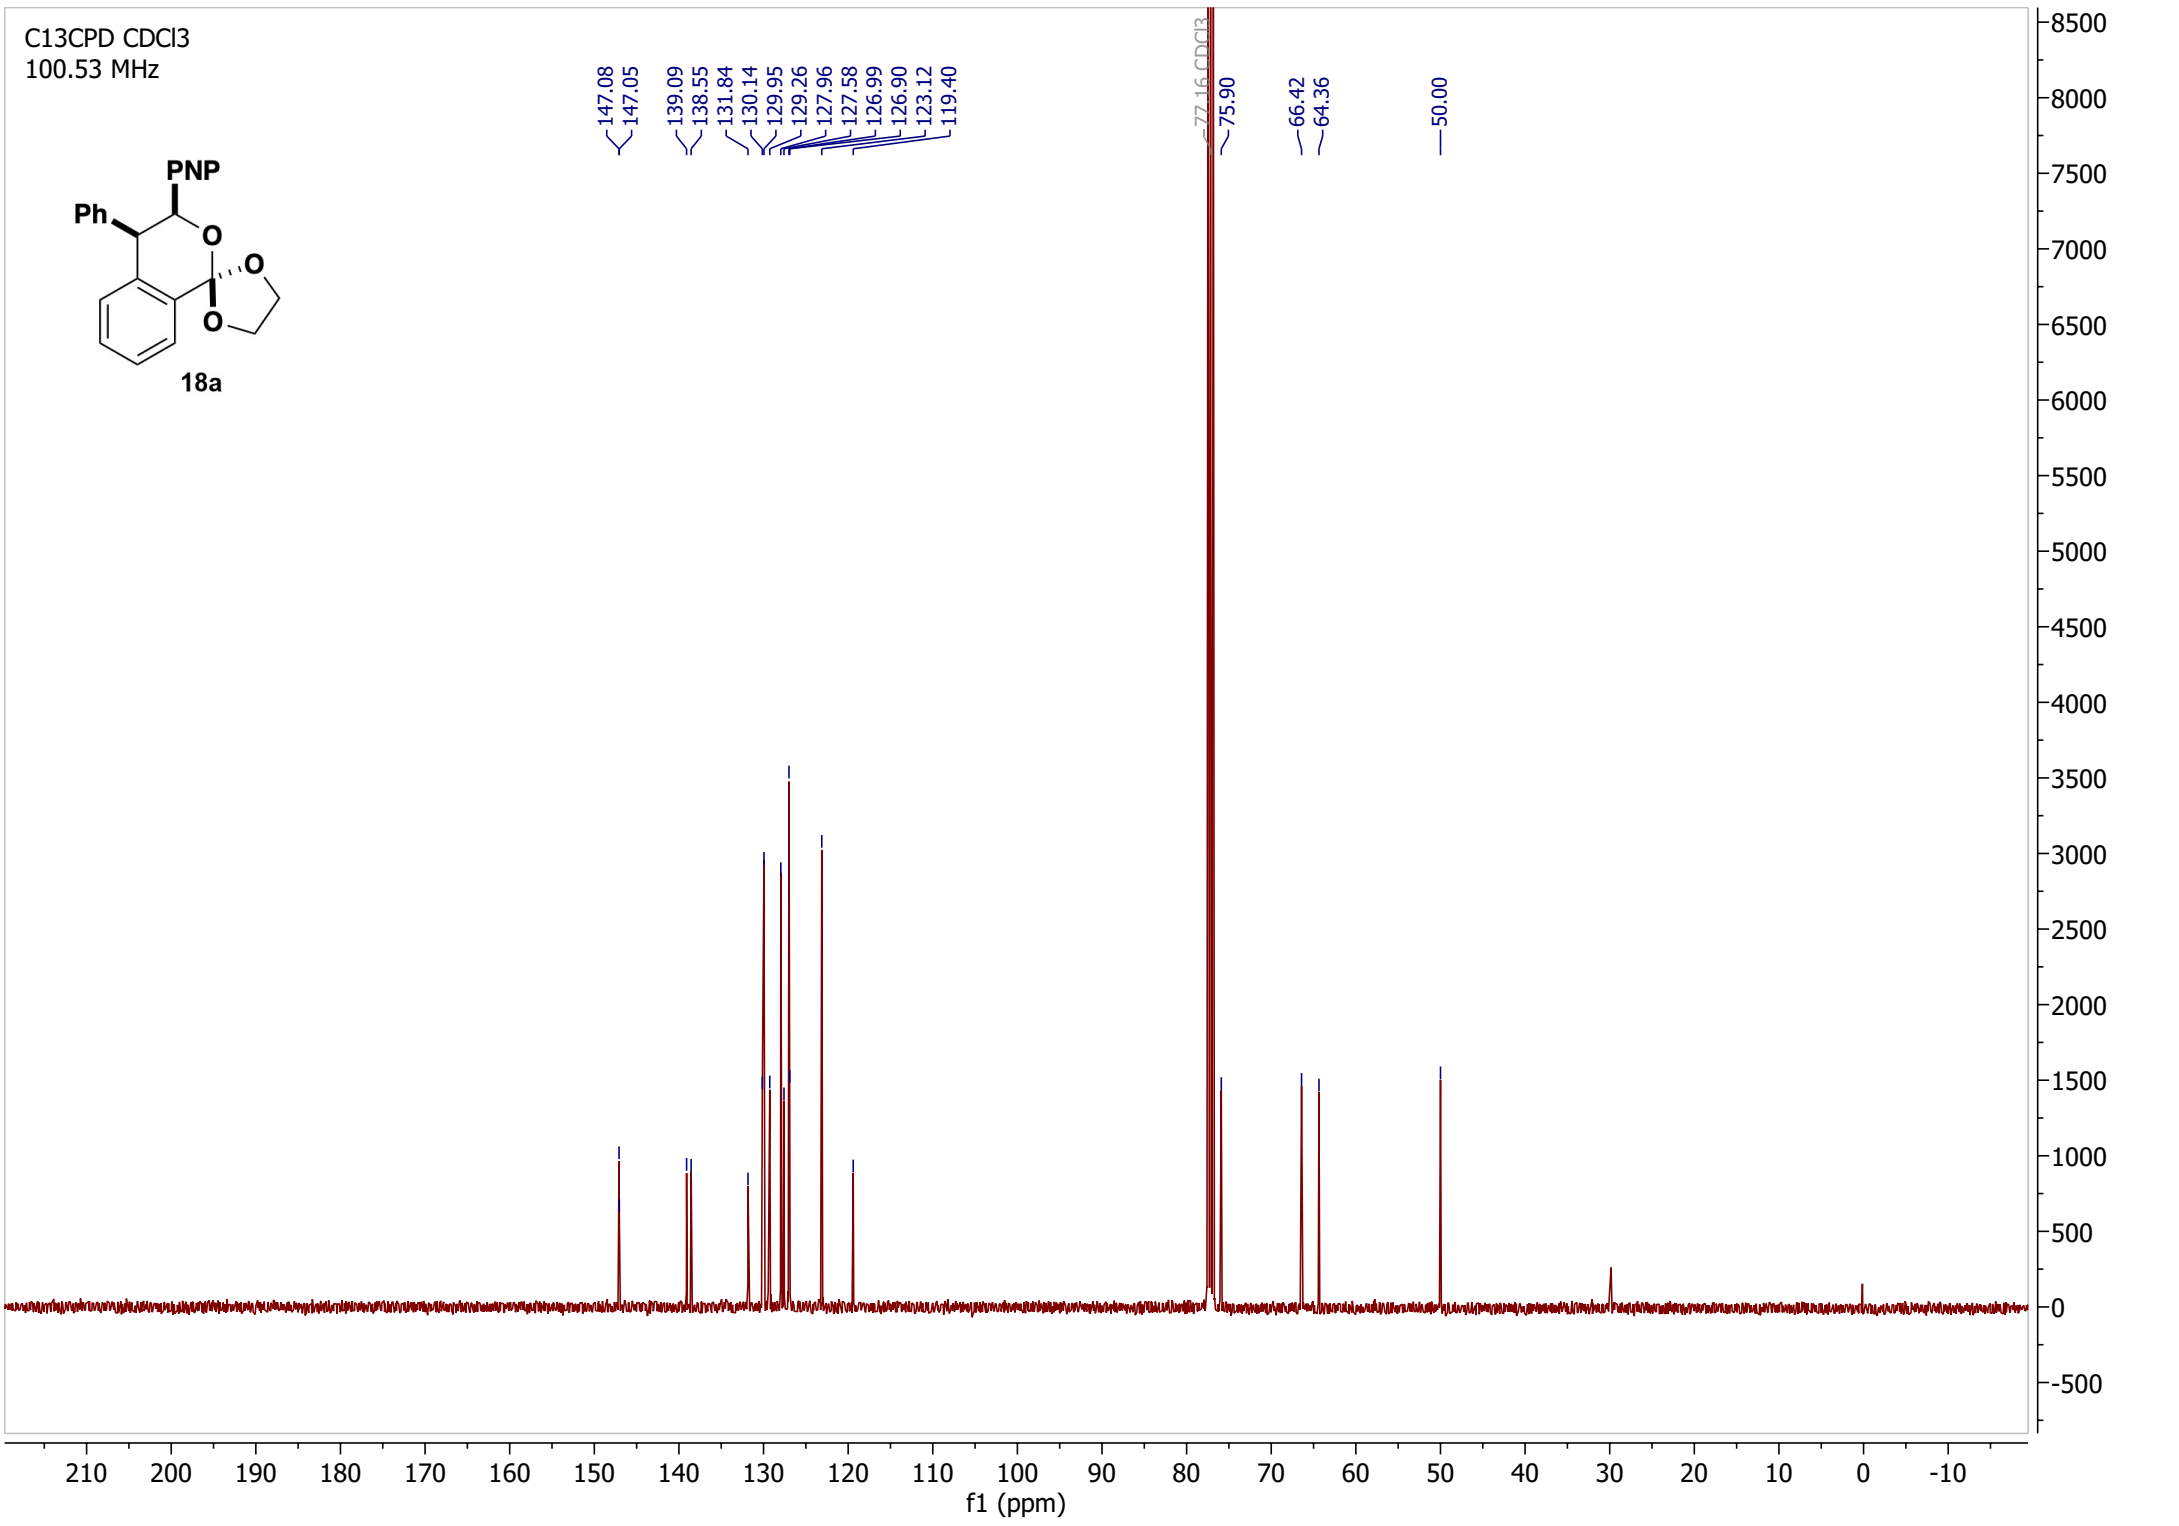

PROTON CDCl3  
399.77 MHz

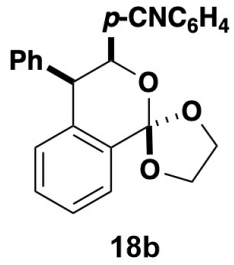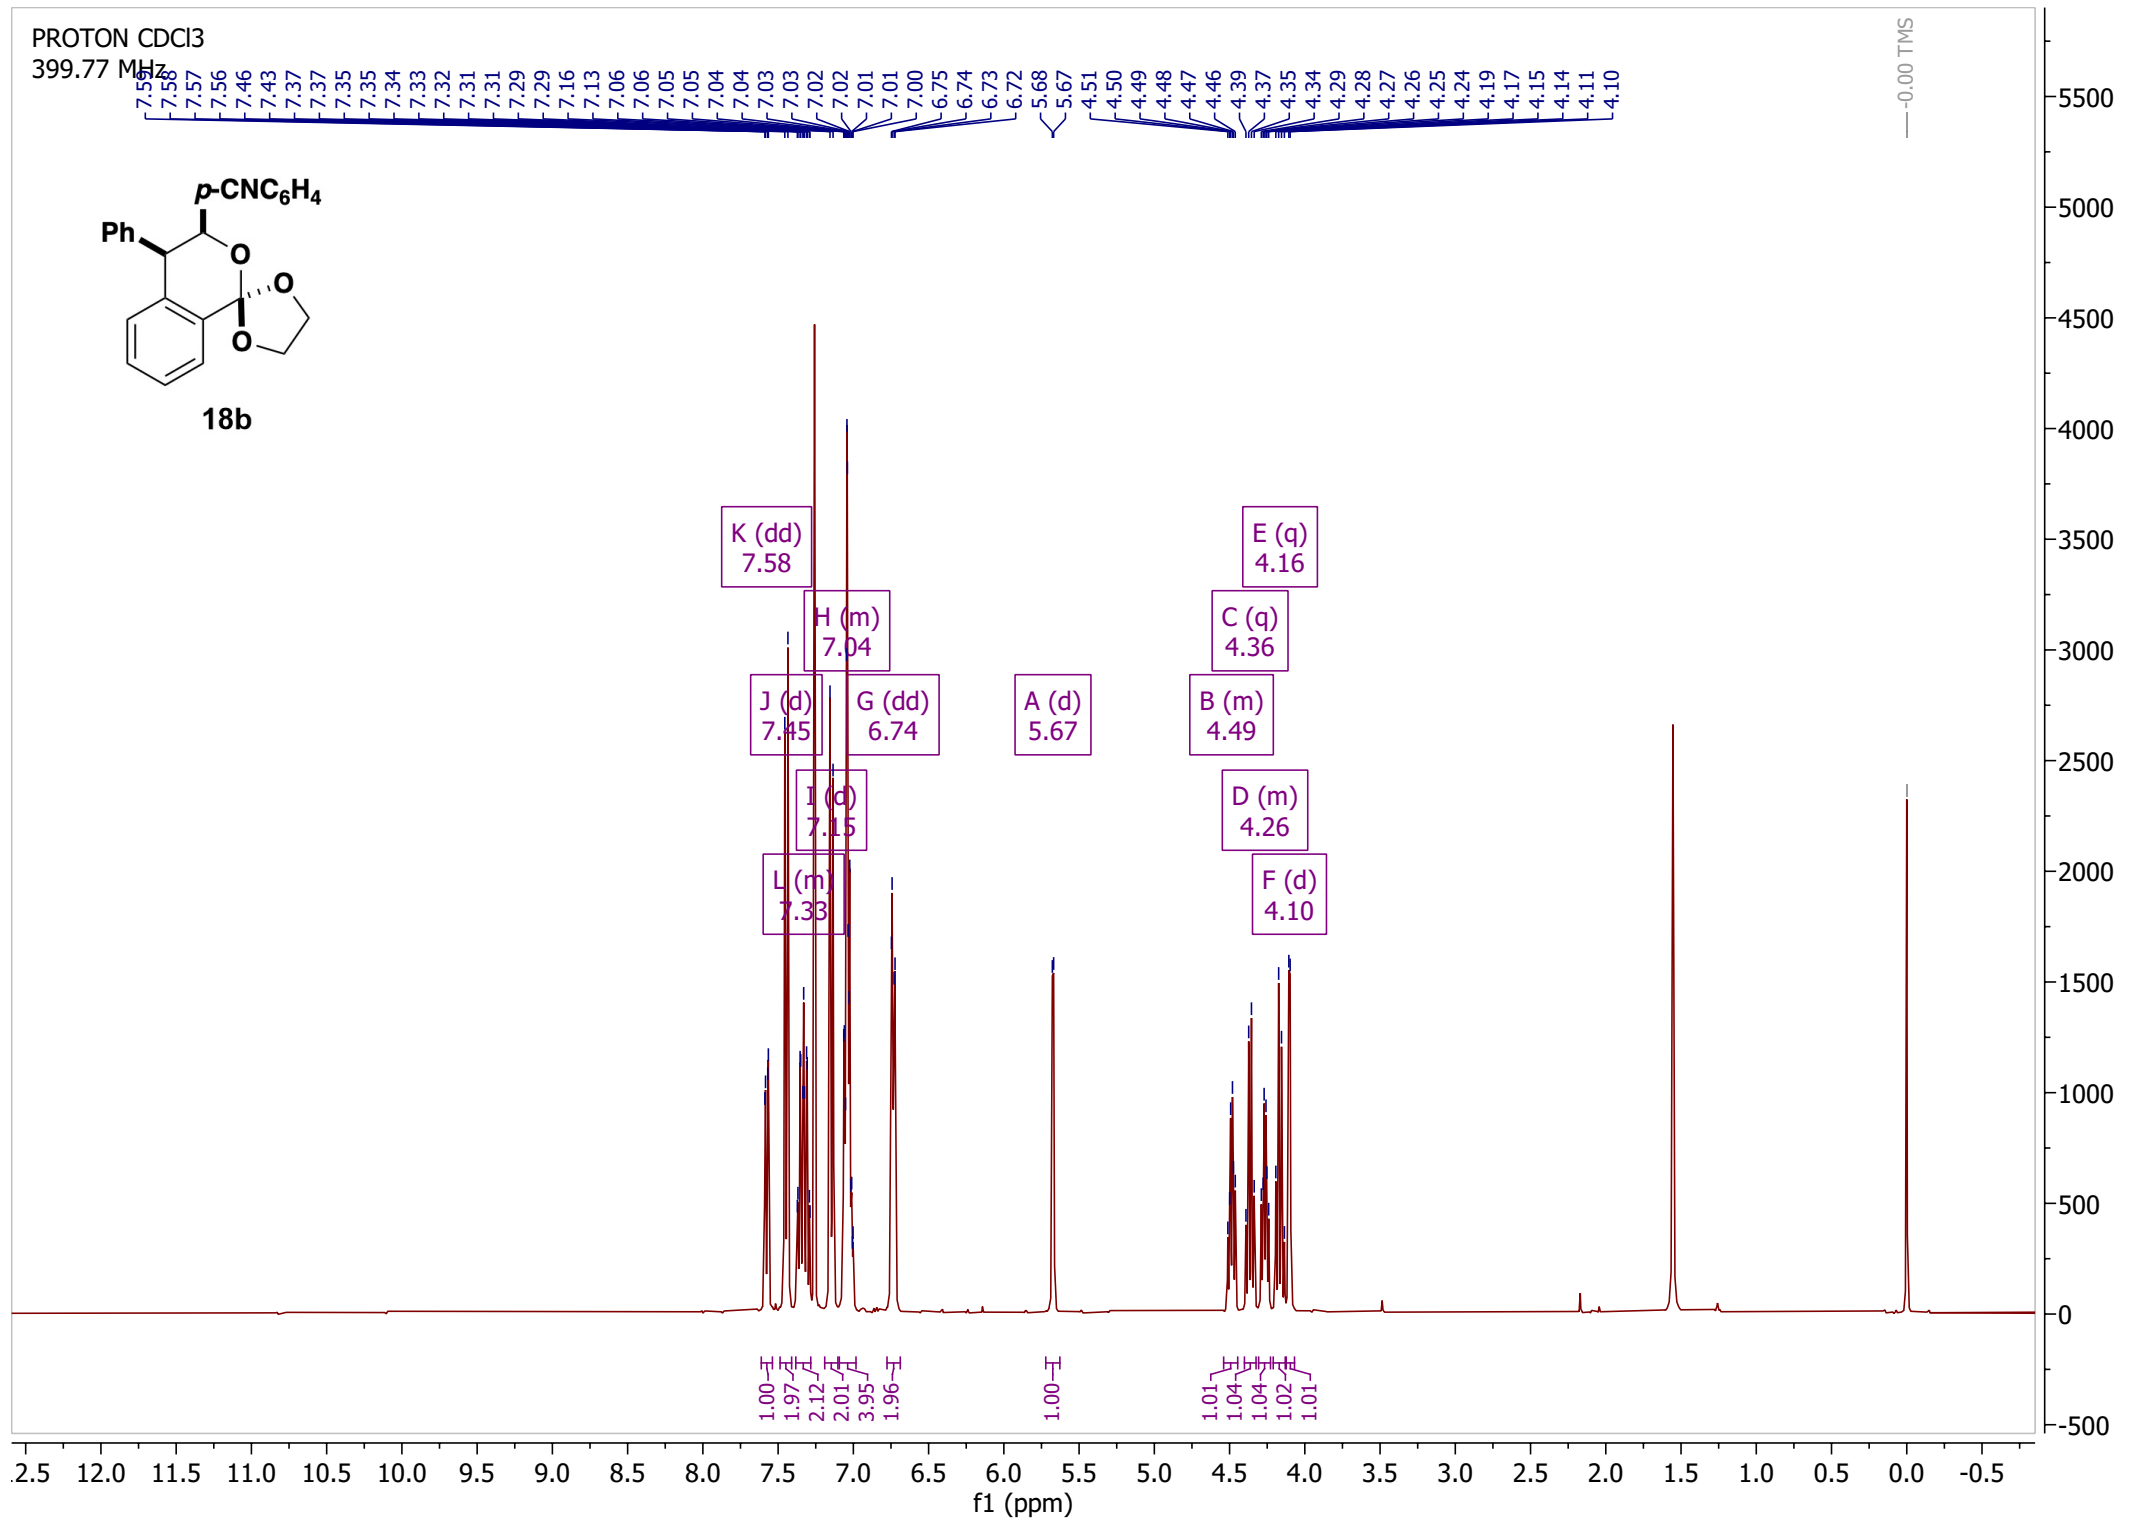

C13CPD CDCl3  
100.53 MHz

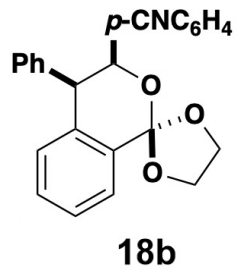

145.06  
139.15  
138.62  
131.89  
131.71  
130.12  
129.98  
129.28  
127.90  
127.56  
126.97  
126.89  
126.83  
119.41  
119.04  
110.95

77.16 CDCl3

76.01

66.40  
64.34

50.02

170 160 150 140 130 120 110 100 90 80 70 60 50 40 30 20 10 0

f1 (ppm)

8000  
7500  
7000  
6500  
6000  
5500  
5000  
4500  
4000  
3500  
3000  
2500  
2000  
1500  
1000  
500  
0  
-500



PROTON CD2Cl2  
399.77 MHz

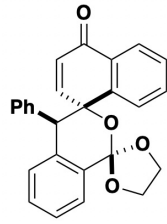

18c

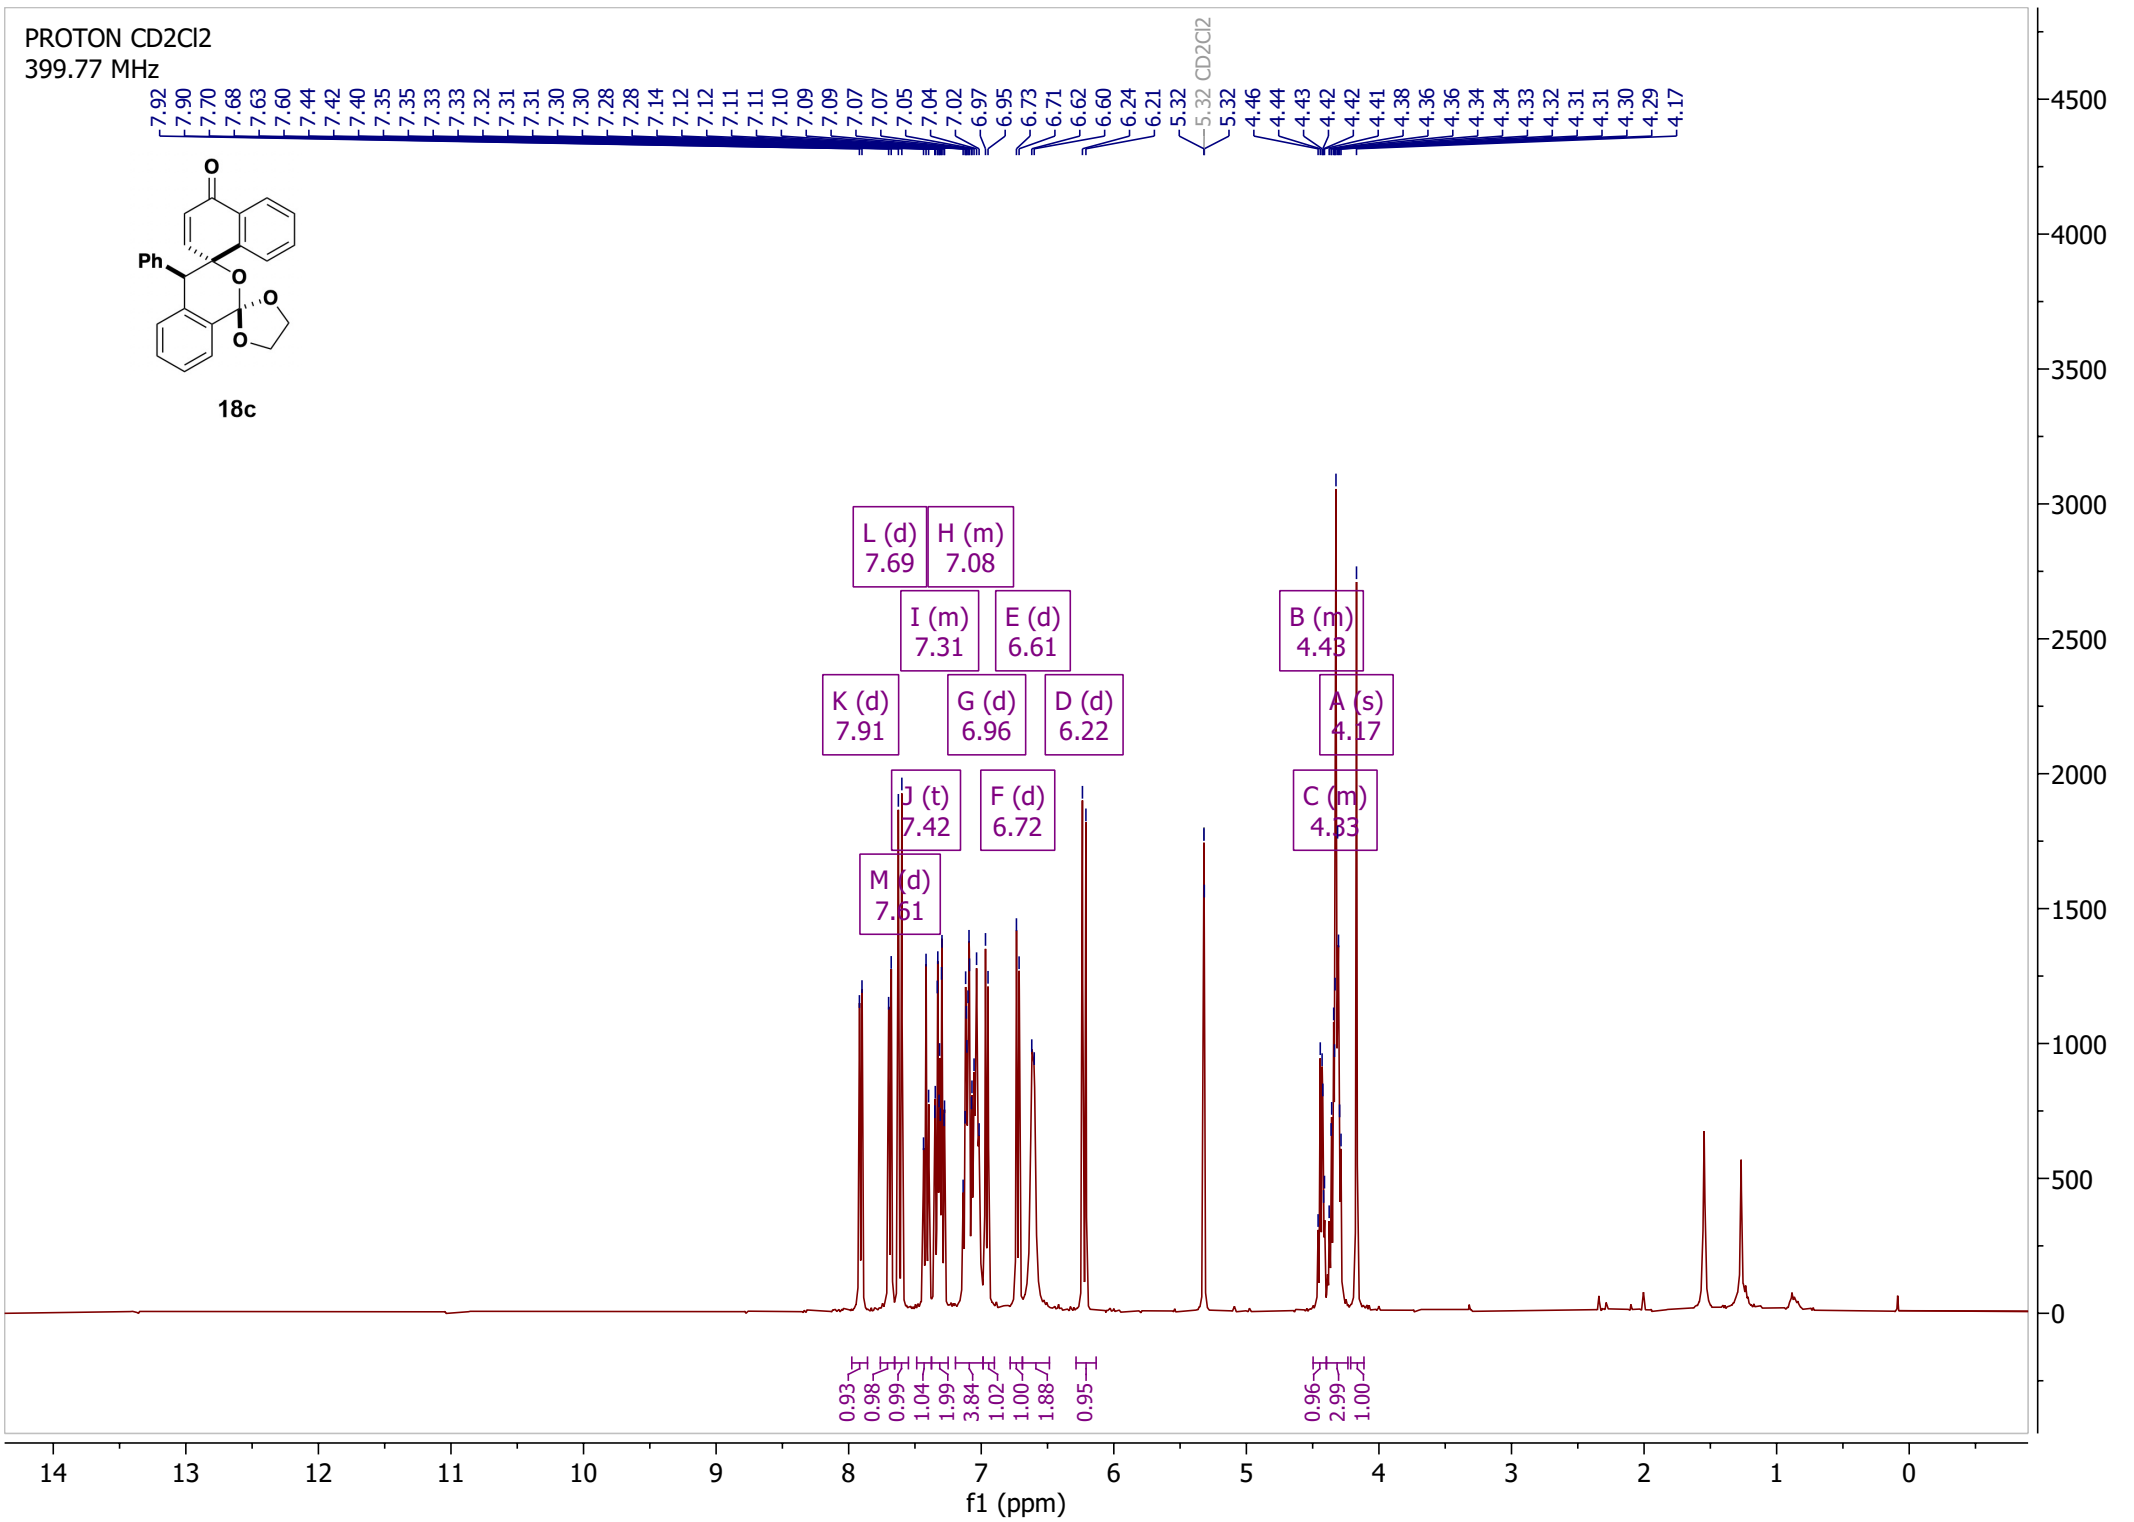

C13CPD CD2Cl2  
100.53 MHz



18c

184.07

151.49  
143.19  
138.67  
137.19  
133.18  
131.59  
131.04  
130.37  
128.80  
128.15  
128.04  
127.98  
127.86  
127.49  
126.45  
125.91  
119.00

77.19

66.24

64.95

56.65

53.04

52.91

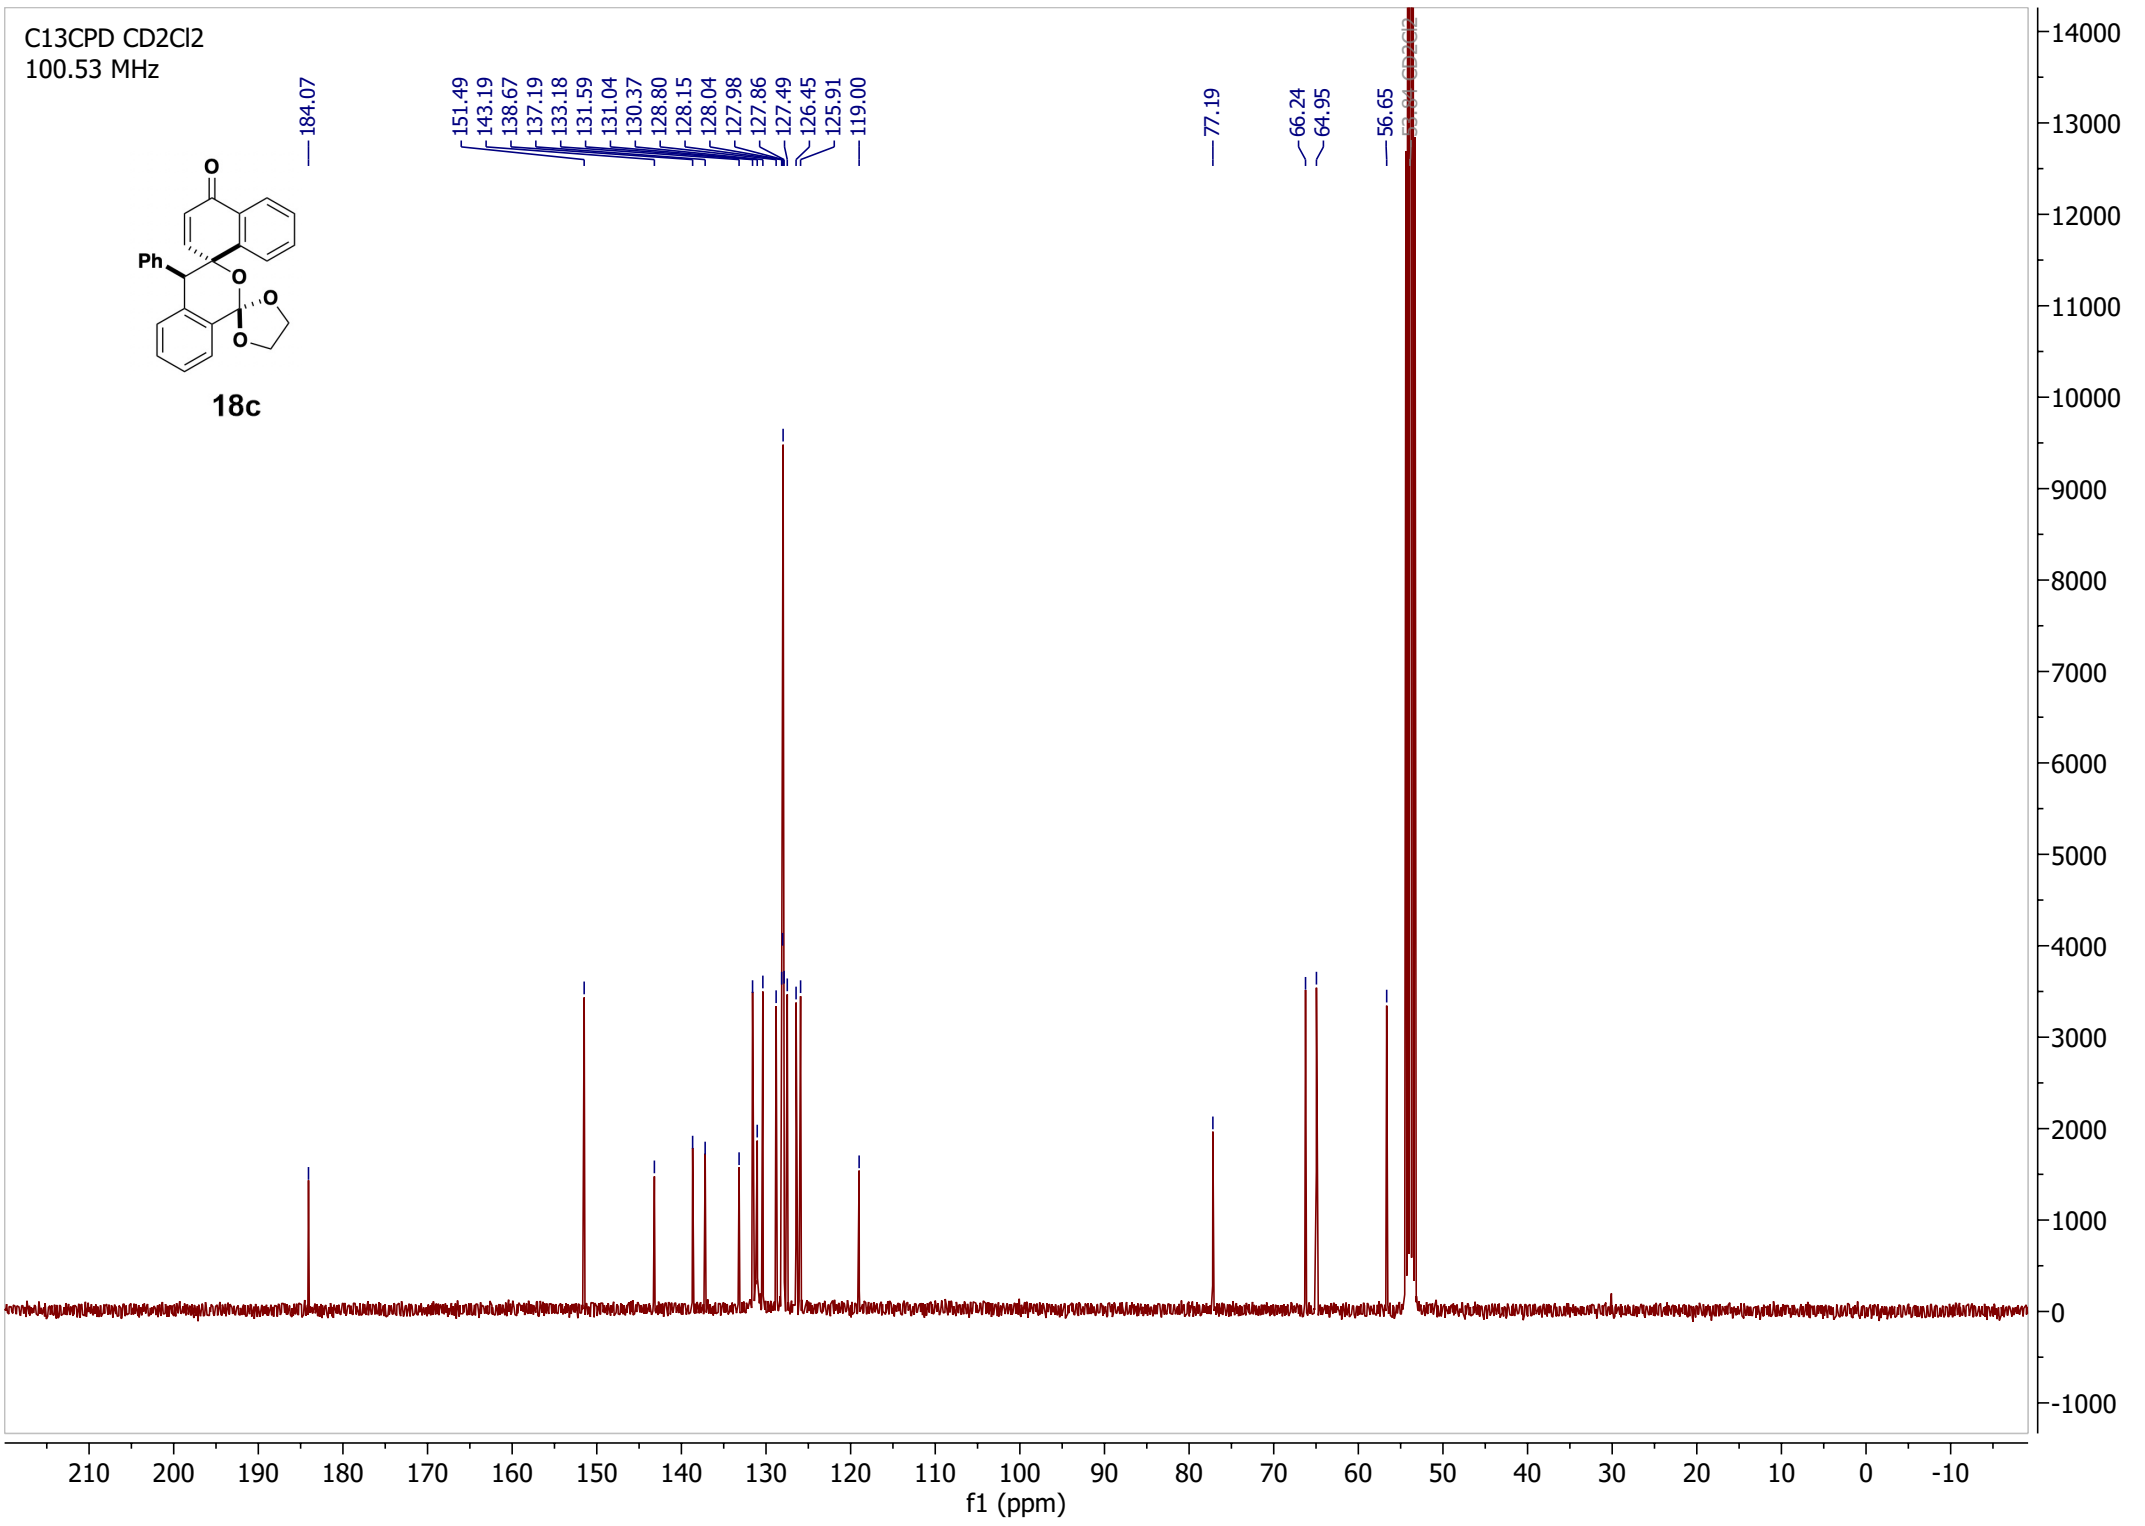

PROTON CDCl3  
399.77 MHz

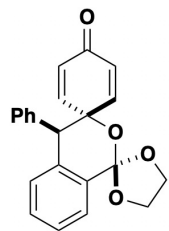

18d

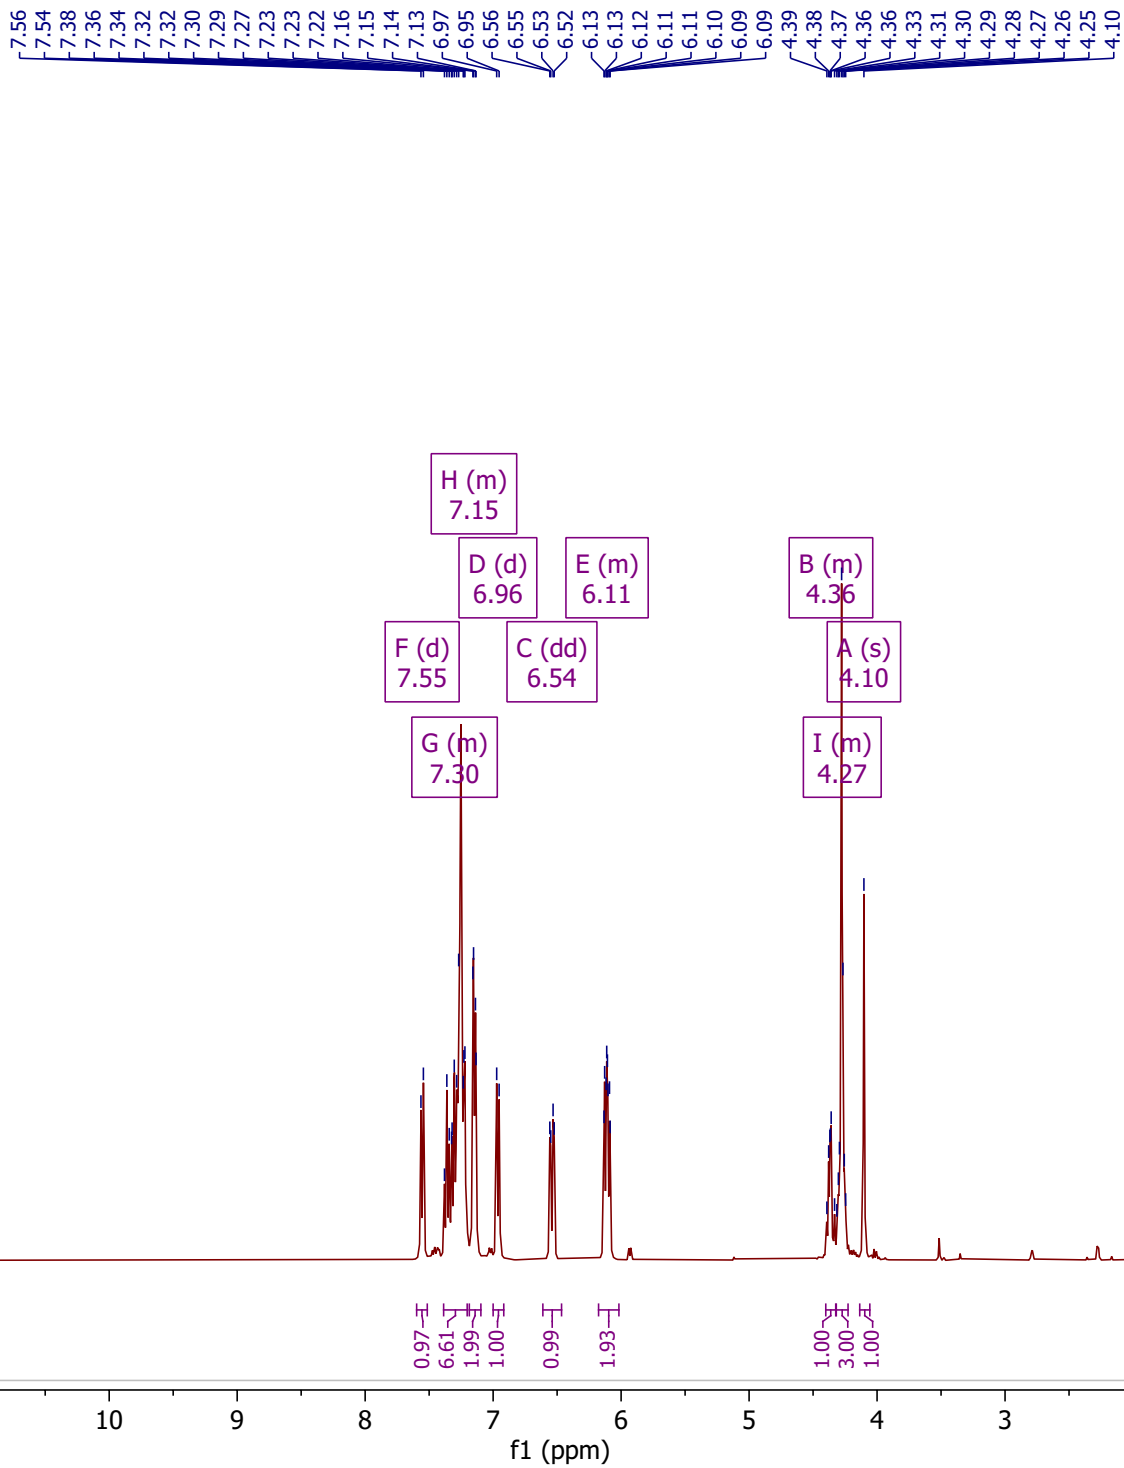

—0.00 TMS

14 13 12 11 10 9 8 7 6 5 4 3 2 1 0 -1

f1 (ppm)

C13CPD CDCl3  
100.53 MHz

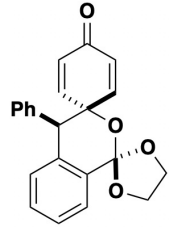

18d

185.22

148.91  
147.79  
138.77  
136.96  
131.52  
130.34  
130.20  
128.79  
128.76  
128.54  
128.27  
127.80  
127.73  
127.20  
117.88

77.16 CDCl3

73.97

65.70

64.86

52.91

9000

8000

7000

6000

5000

4000

3000

2000

1000

0

210 200 190 180 170 160 150 140 130 120 110 100 90 80 70 60 50 40 30 20 10 0 -10

f1 (ppm)

PROTON CDCl3

399.77 MHz

7.719 7.719 7.699 7.668 7.445 7.440 7.335 7.333 7.331 7.299 7.277 7.277 7.266 7.266 7.144 7.112 7.109 7.099 7.088 7.088 7.077 7.077 7.066 7.066 7.055 7.055 7.044 7.044 6.955 6.933 6.933 6.799 6.799 6.788 6.663 6.663 6.661 6.661 6.646 6.646 6.444 6.444 6.311 6.311 6.299 6.299 5.200 5.200 5.066 5.066 5.051 5.051 4.499 4.499 4.488 4.488 4.477 4.477 4.466 4.466 4.466 4.466 4.311 4.311 4.300 4.300 4.299 4.299 4.288 4.288 4.277 4.277 4.277 4.277 4.266 4.266 4.266 4.266 4.255 4.255 4.244 4.244 4.244 4.244 4.233 4.233 4.211 4.211

—0.00 TMS

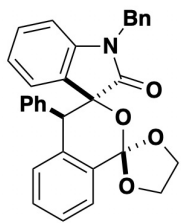

18e

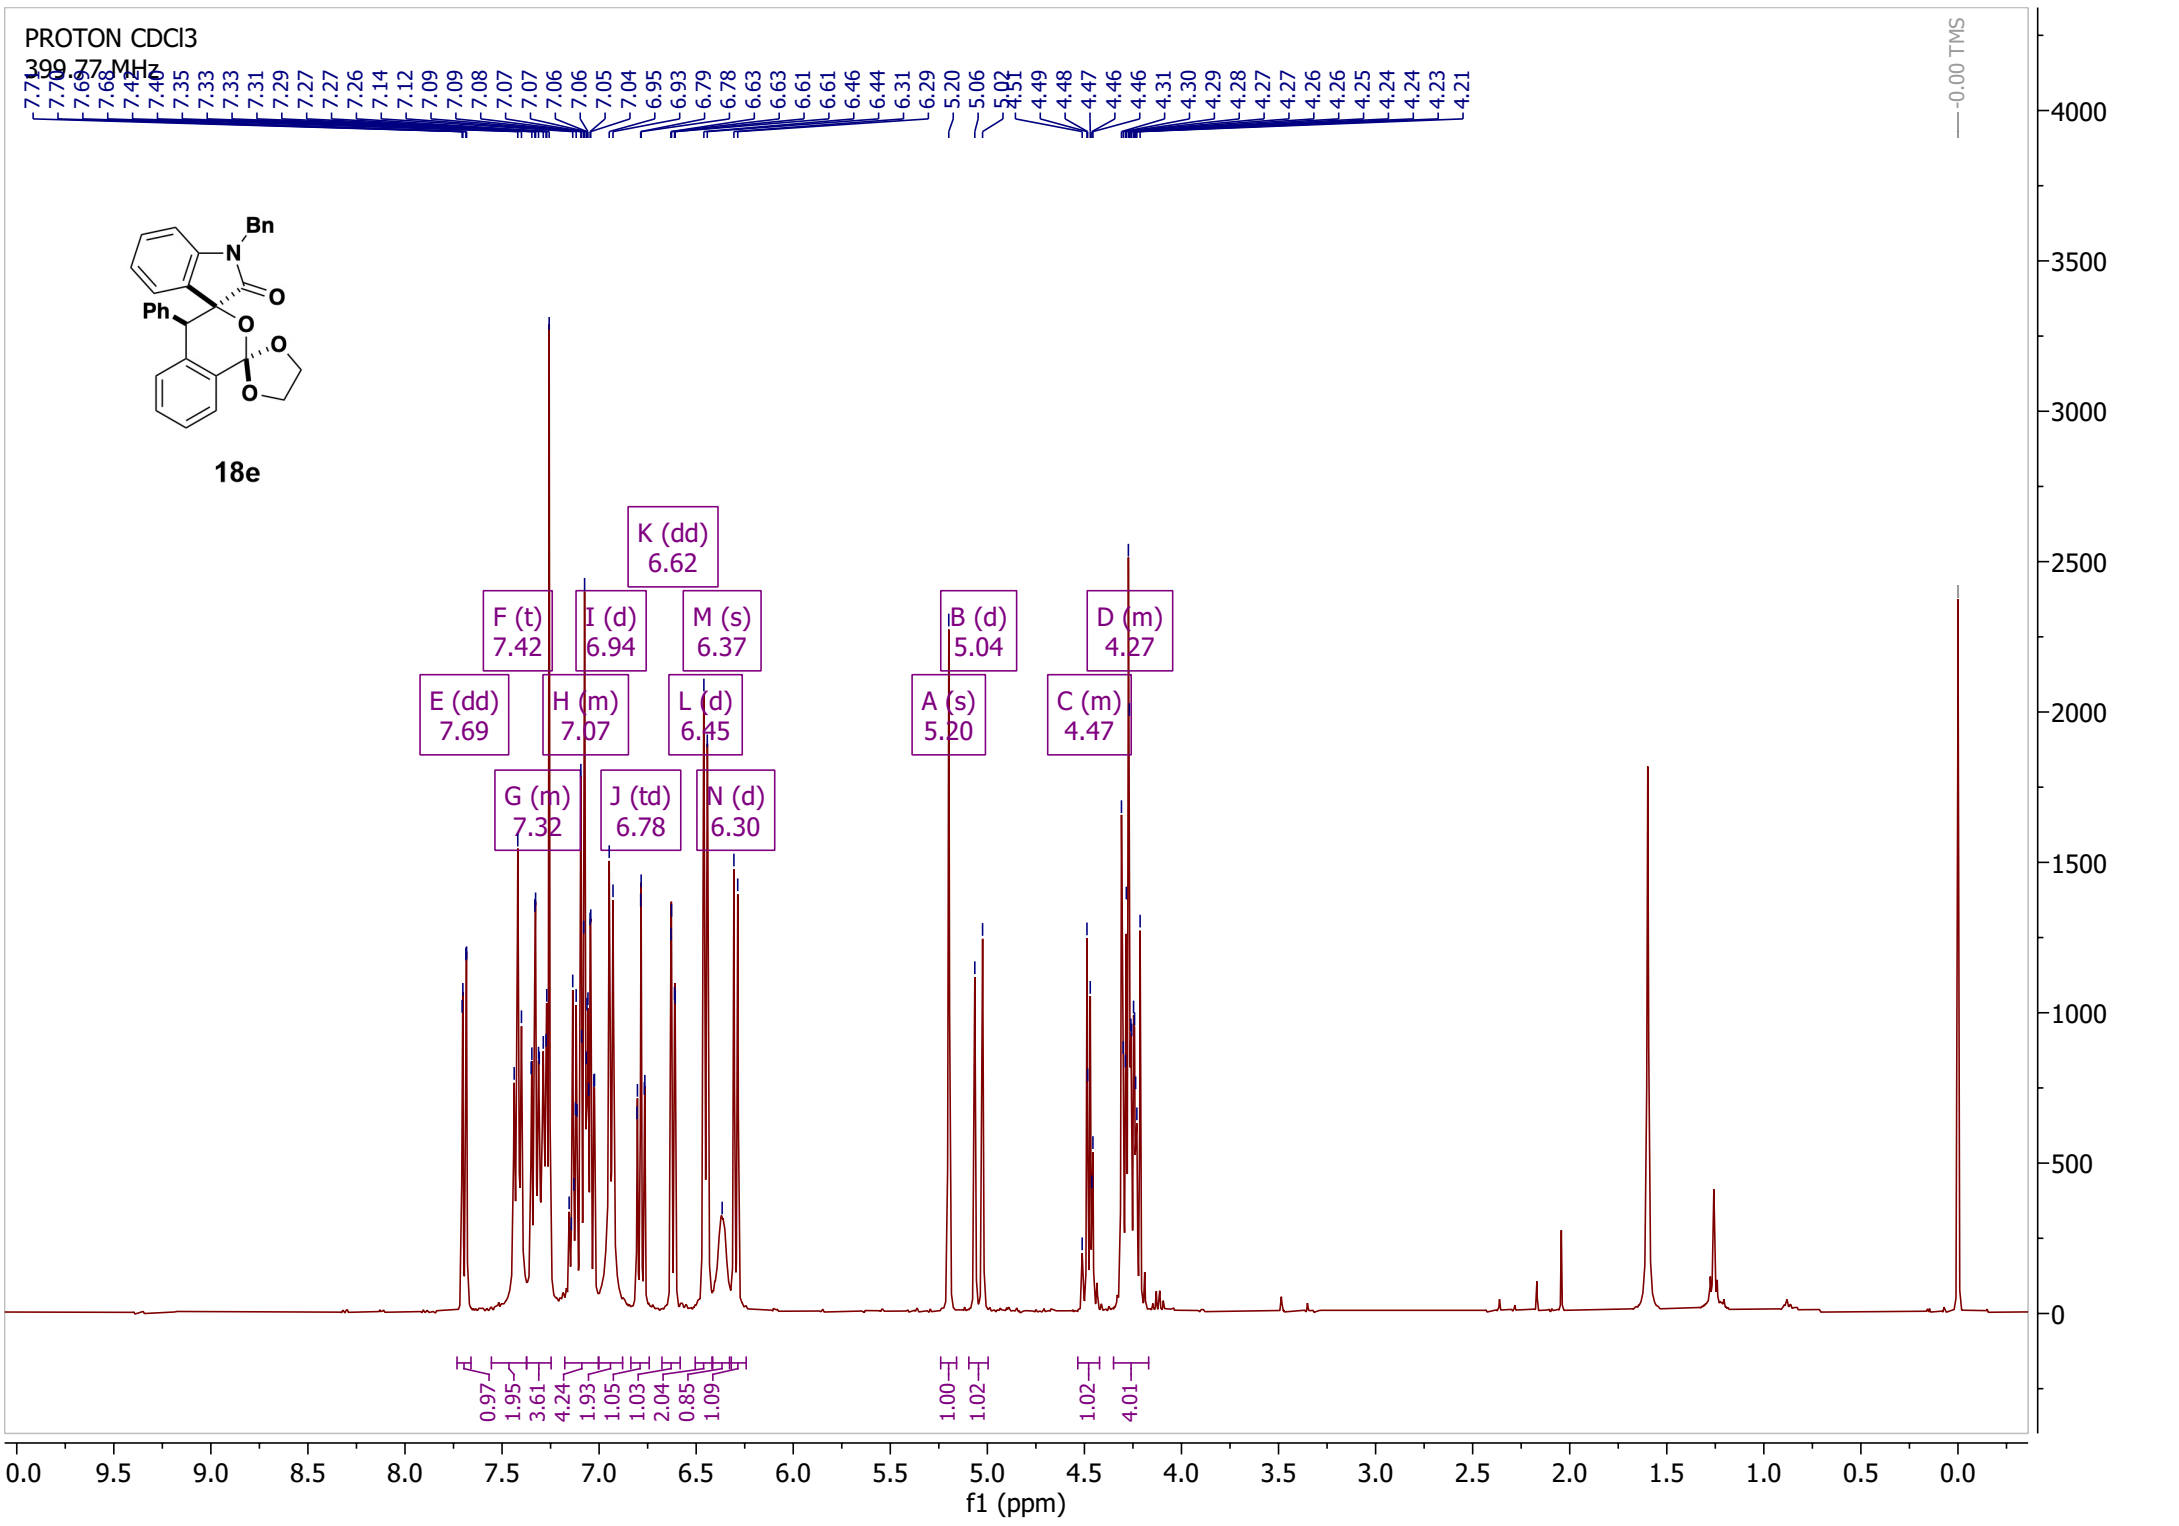

C13CPD CDCl3  
100.53 MHz

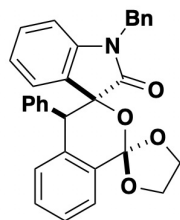

**18e**

—173.92

—143.24

—136.74

—135.00

—134.48

—133.62

—133.52

—129.94

—129.69

—129.39

—129.07

—128.68

—127.91

—127.68

—127.44

—127.42

—127.21

—126.50

—126.32

—125.53

—122.45

—118.50

—109.46

—81.56

—77.48 CDCl3

—77.16 CDCl3

—77.16 CDCl3

—76.84 CDCl3

—65.48

—64.74

—49.99

—43.86

—0.14

210

200

190

180

170

160

150

140

130

120

110

100

90

80

70

60

50

40

30

20

10

0

-10

f1 (ppm)

5500

5000

4500

4000

3500

3000

2500

2000

1500

1000

500

0

-500

PROTON CDCl3  
399.77 MHz

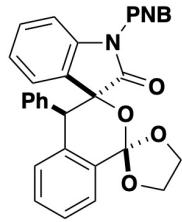

18f

7.93  
7.91  
7.71  
7.69  
7.45  
7.44  
7.42  
7.36  
7.35  
7.33  
7.26  
7.10  
7.08  
7.06  
6.99  
6.93  
6.91  
6.86  
6.84  
6.82  
6.66  
6.65  
6.51  
6.49  
6.36  
6.23  
6.21  
5.23  
5.19  
4.48  
4.47  
4.46  
4.34  
4.30  
4.28  
4.27  
4.26  
4.25  
4.23

-0.00 TMS

3000  
2800  
2600  
2400  
2200  
2000  
1800  
1600  
1400  
1200  
1000  
800  
600  
400  
200  
0  
-200

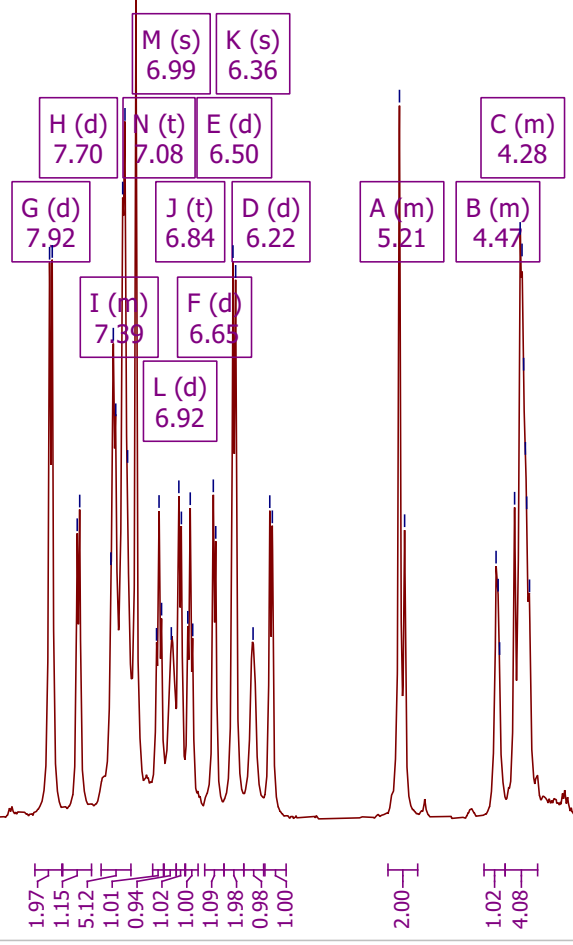

14 13 12 11 10 9 8 7 6 5 4 3 2 1 0 -1  
f1 (ppm)

C13CPD CDCl3  
100.53 MHz

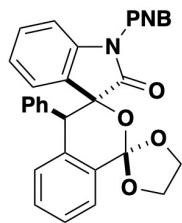

**18f**

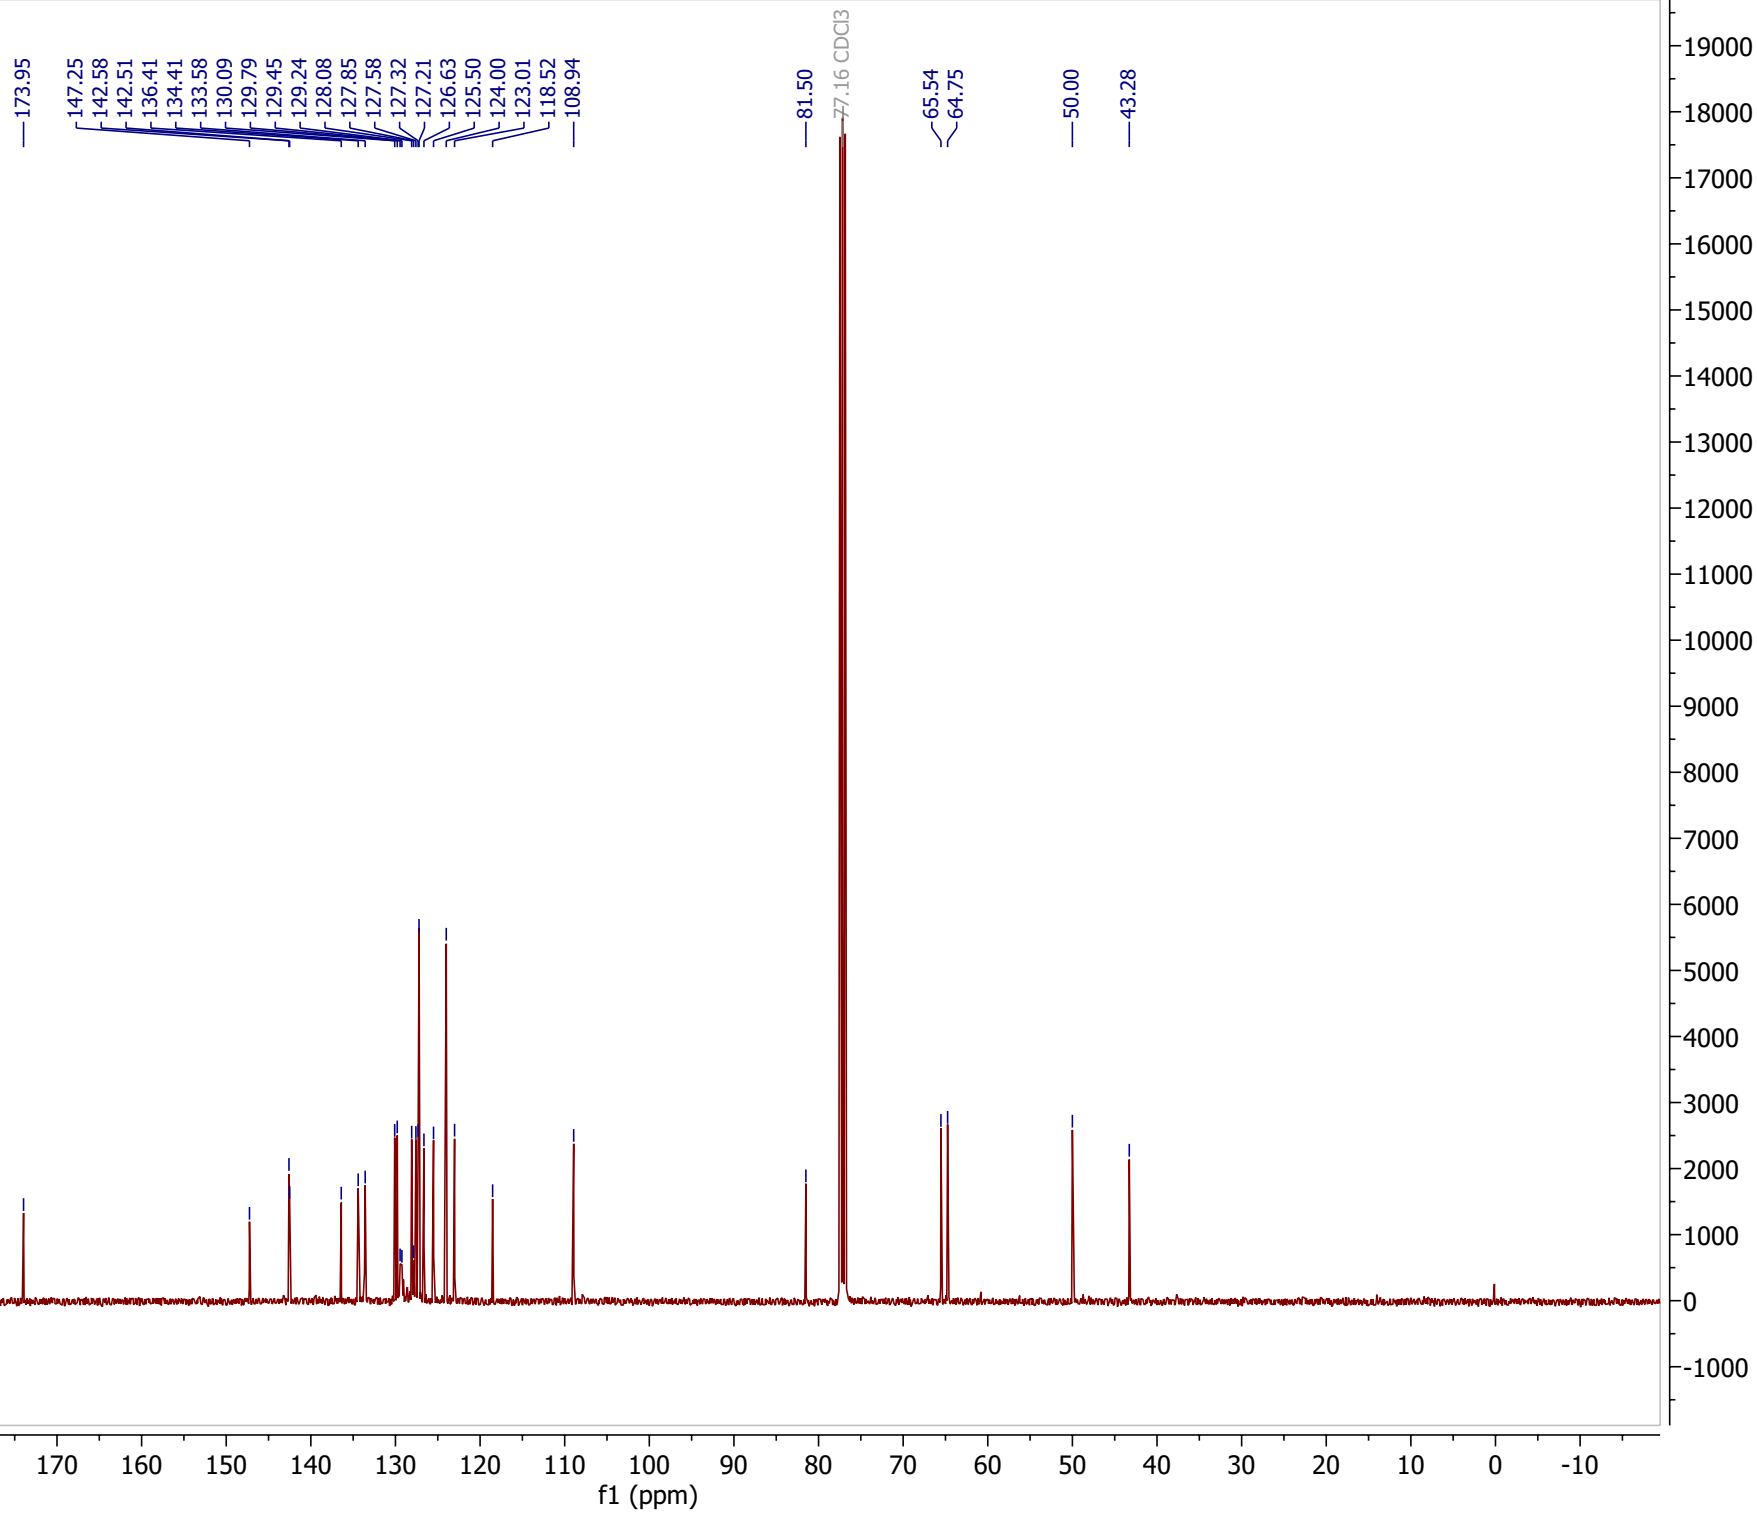



PROTON CD2Cl2  
399.77 MHz

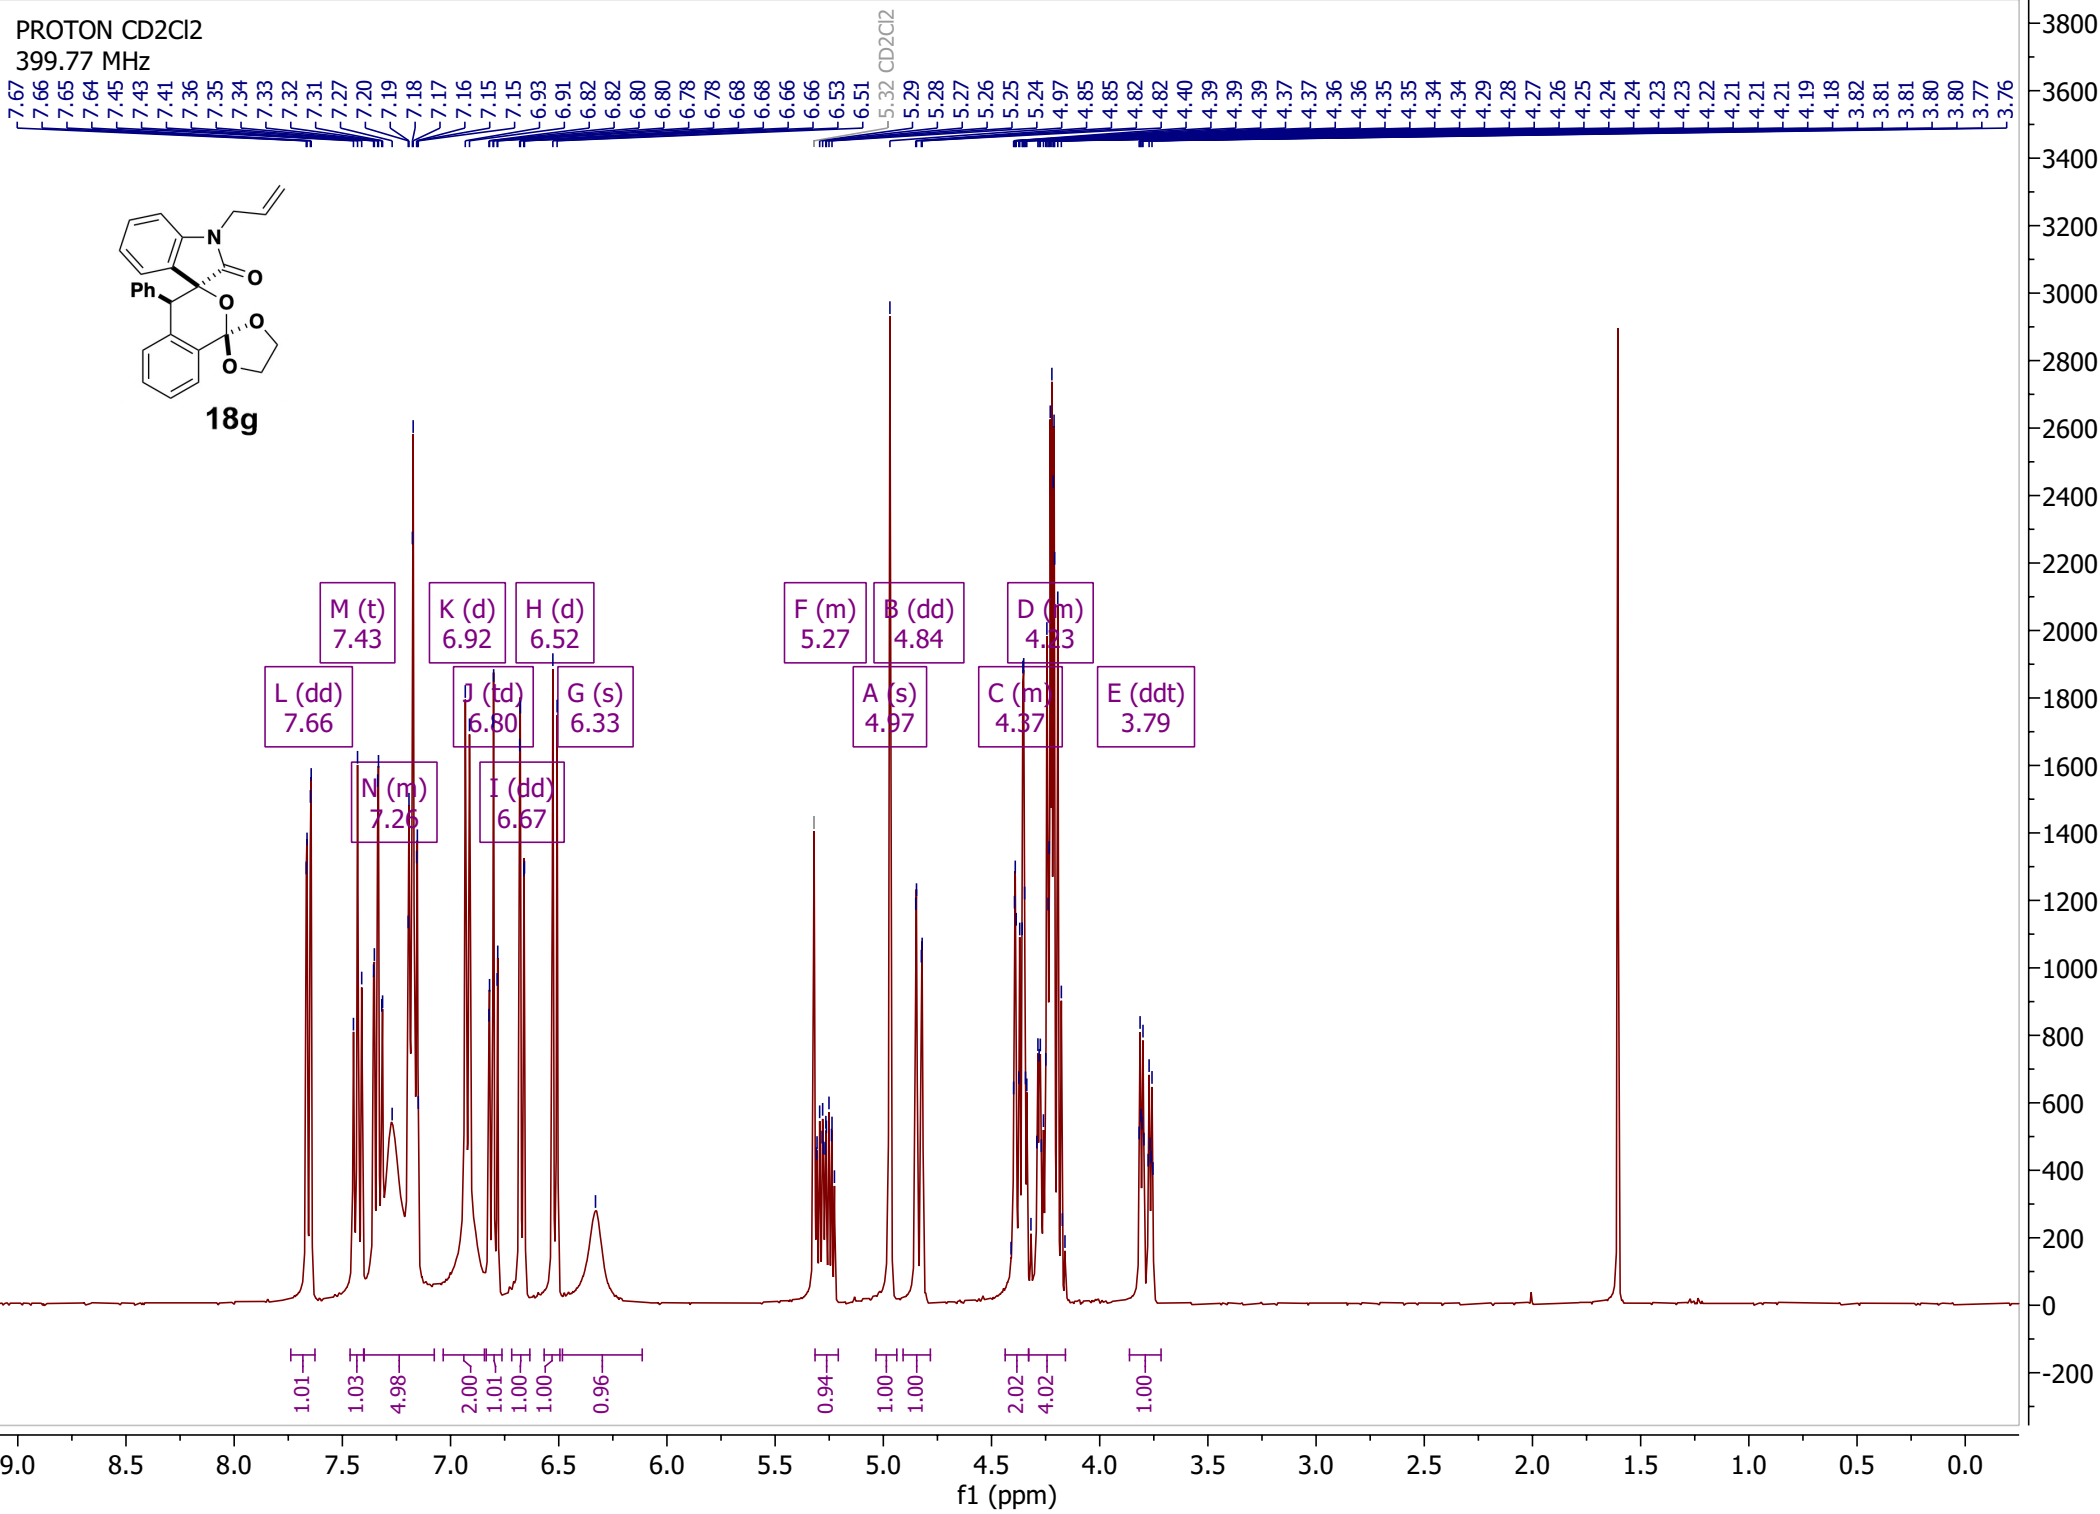

f1 (ppm)

C13CPD CD2Cl2  
100.53 MHz

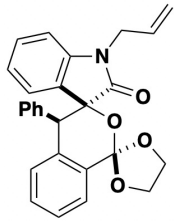

**18g**

— 173.34

143.59

136.94

134.93

133.81

131.07

131.05

130.12

129.88

128.08

127.72

127.65

127.02

126.78

126.26

122.29

118.75

116.80

109.31

— 81.76

65.55

65.20

— 53.84 CD2Cl2

— 50.59

— 42.35

210 200 190 180 170 160 150 140 130 120 110 100 90 80 70 60 50 40 30 20 10 0 -10

f1 (ppm)

75000  
70000  
65000  
60000  
55000  
50000  
45000  
40000  
35000  
30000  
25000  
20000  
15000  
10000  
5000  
0  
-5000

PROTON CDCl3  
399.77 MHz

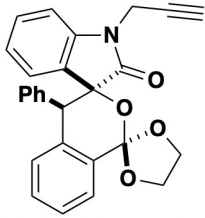

18h

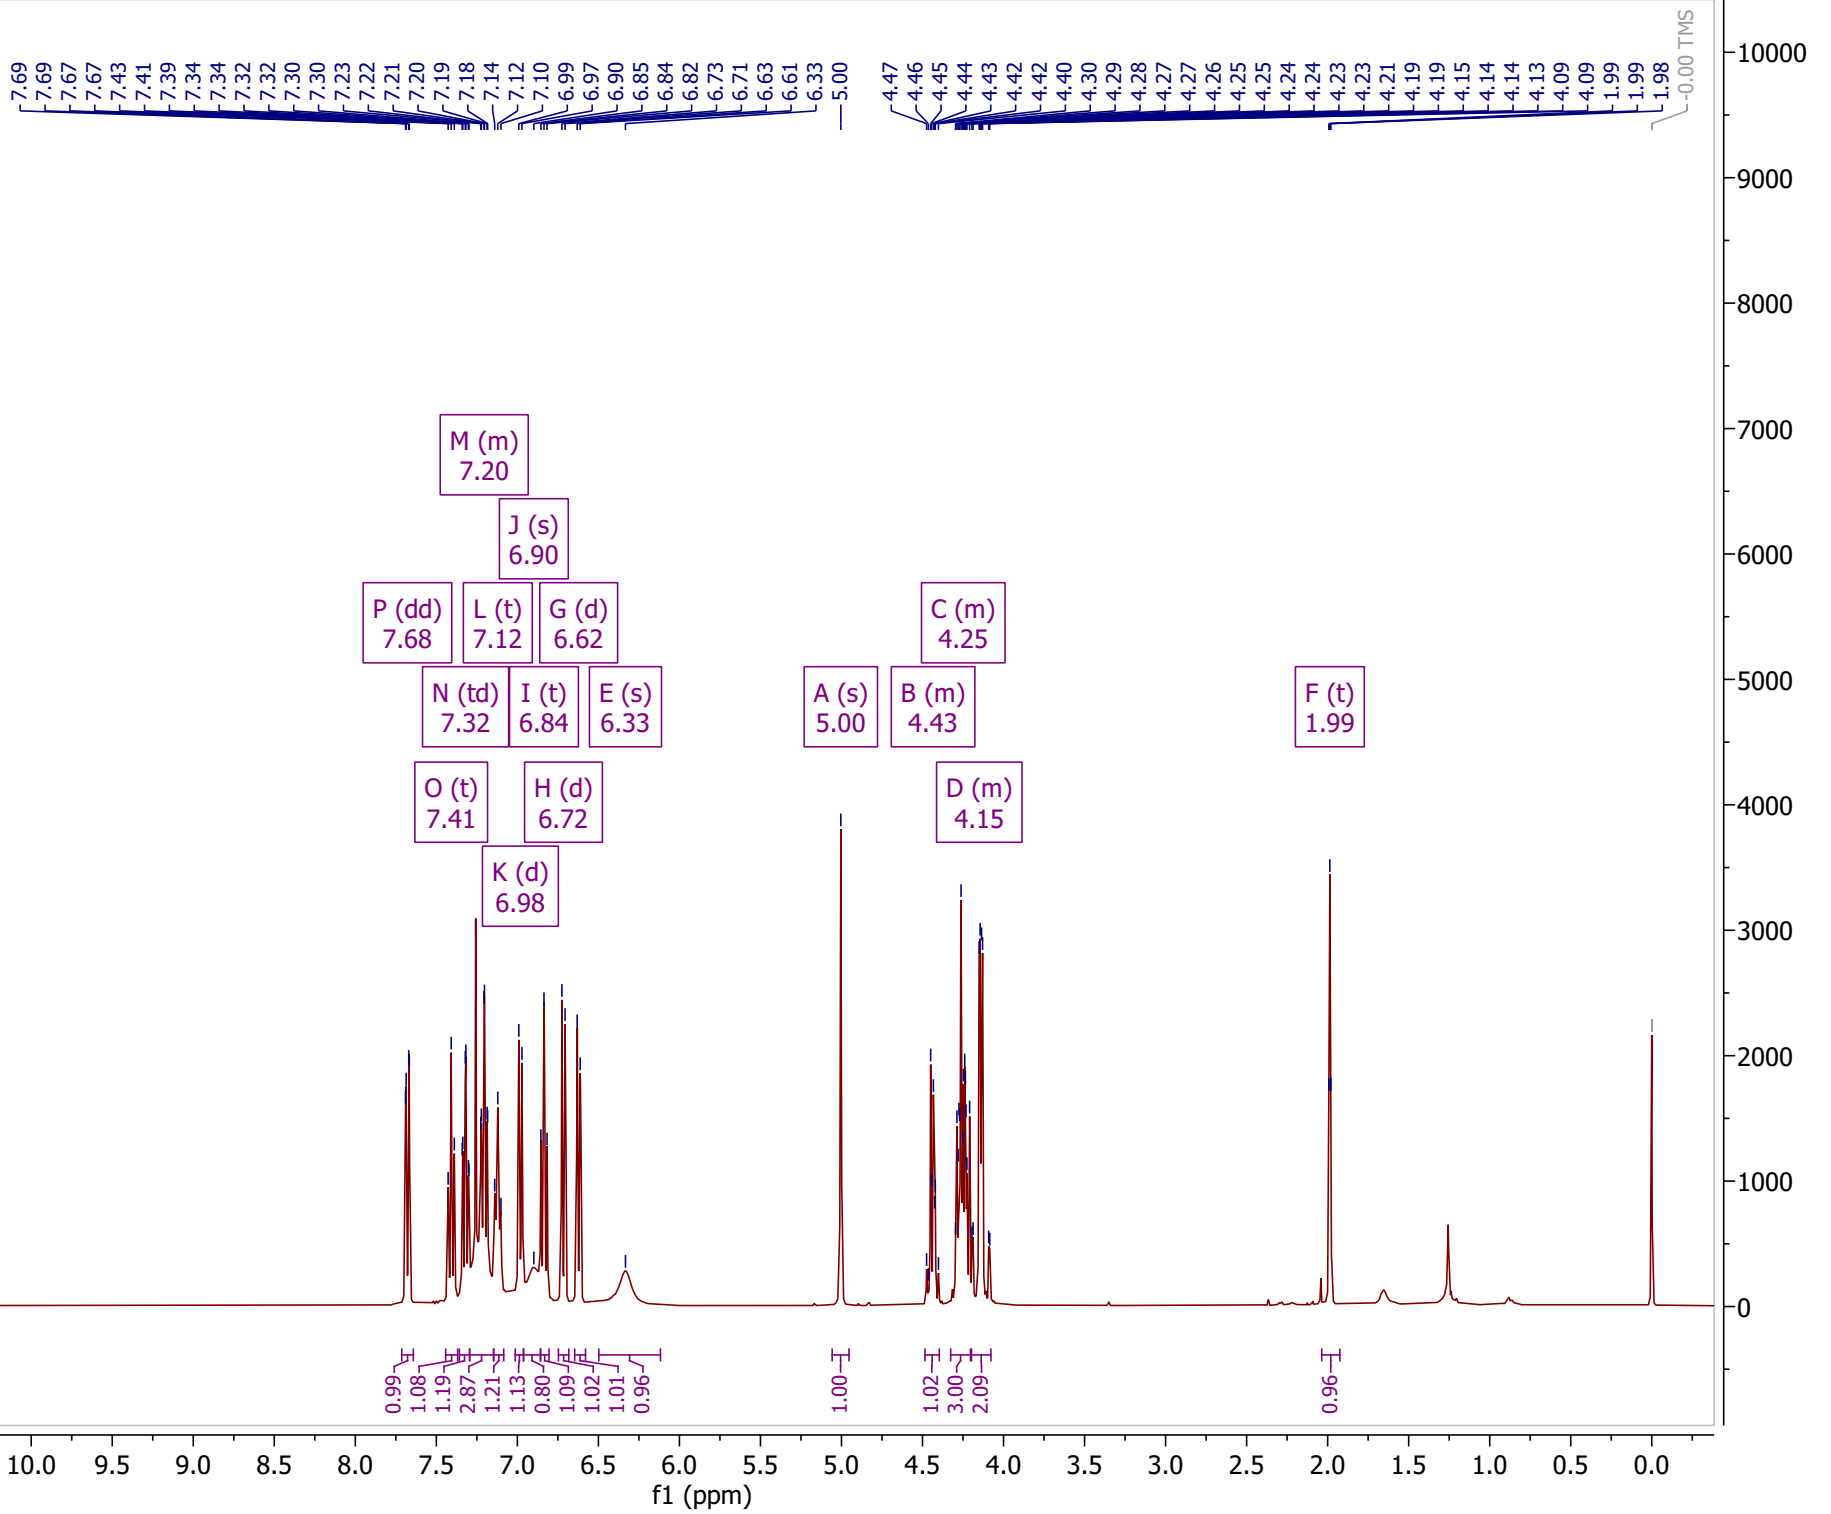

C13CPD CDCl3  
100.53 MHz

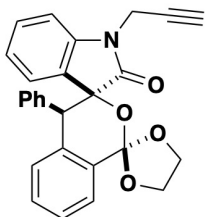

18h

172.86

141.93

136.25

134.32

133.43

132.75

129.87

129.66

129.06

128.50

127.70

127.54

127.44

127.34

126.94

126.39

125.67

122.67

118.44

108.95

81.66

77.16 CDCl3

76.29

72.06

65.41

64.76

50.25

29.04

210 200 190 180 170 160 150 140 130 120 110 100 90 80 70 60 50 40 30 20 10 0 -10

f1 (ppm)

9000  
8500  
8000  
7500  
7000  
6500  
6000  
5500  
5000  
4500  
4000  
3500  
3000  
2500  
2000  
1500  
1000  
500  
0  
-500

PROTON CD2Cl2  
399.77 MHz

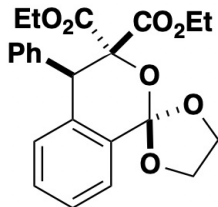

18i

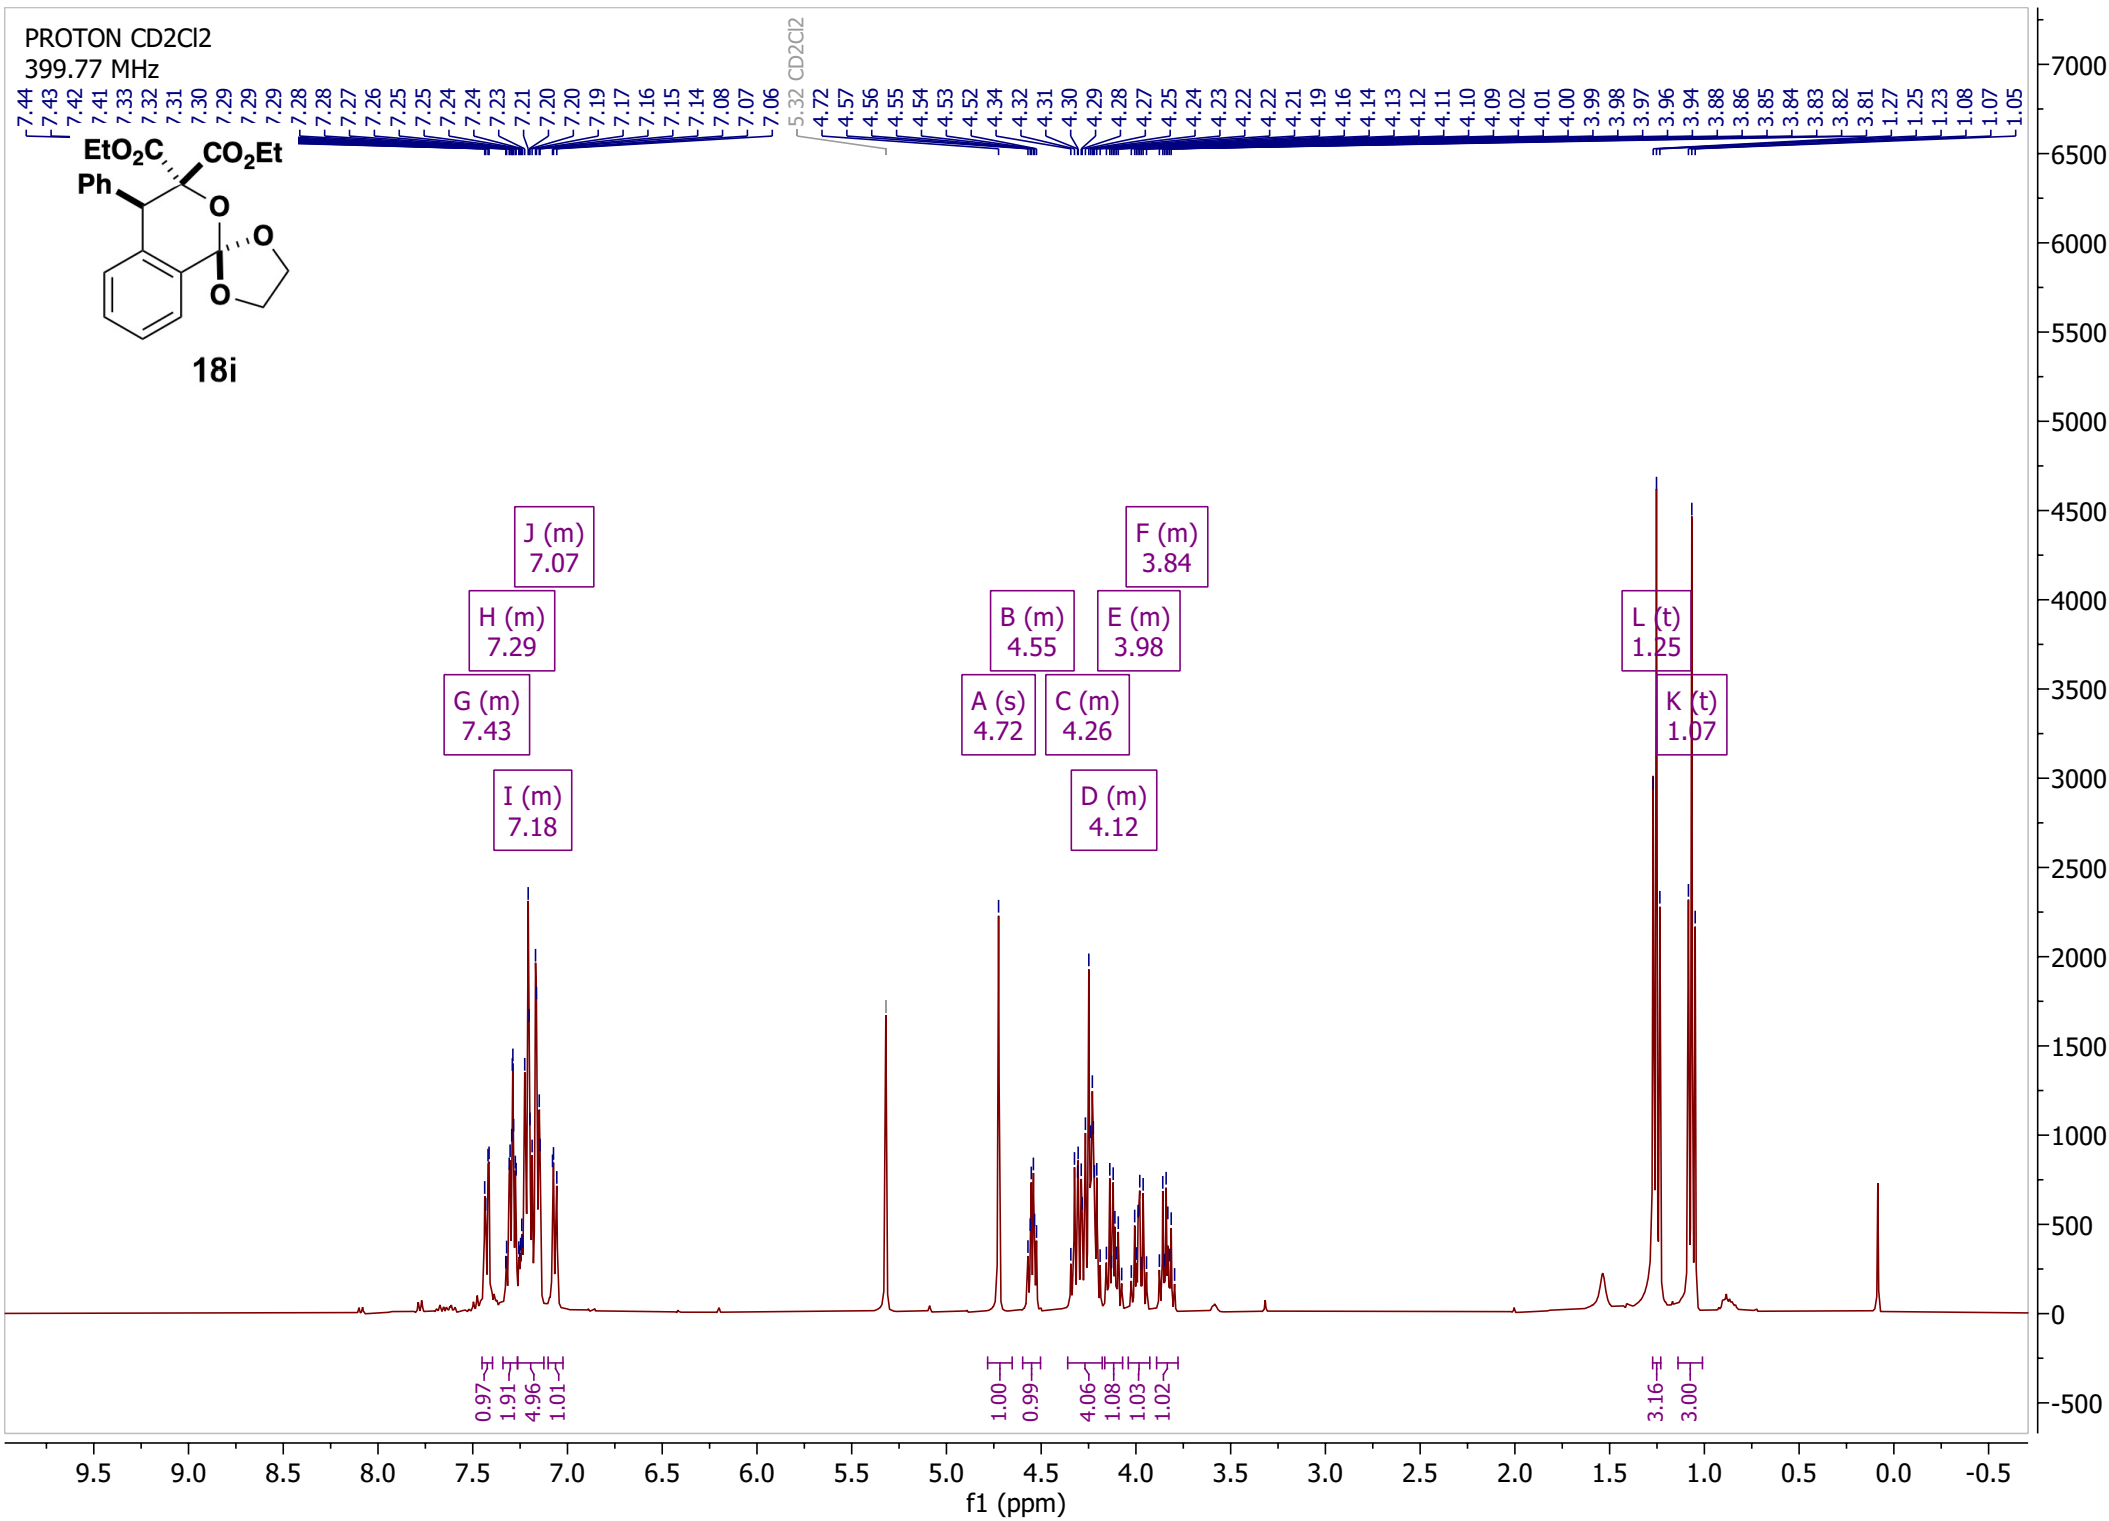

C13CPD CD2Cl2  
100.53 MHz

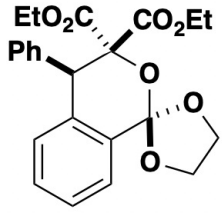

**18i**

168.68  
166.39

139.72  
138.19  
130.61  
130.04  
129.79  
129.07  
128.64  
127.81  
127.36  
126.89  
118.59

83.38

66.88  
64.61  
62.41  
62.06

46.66

14.03  
13.99

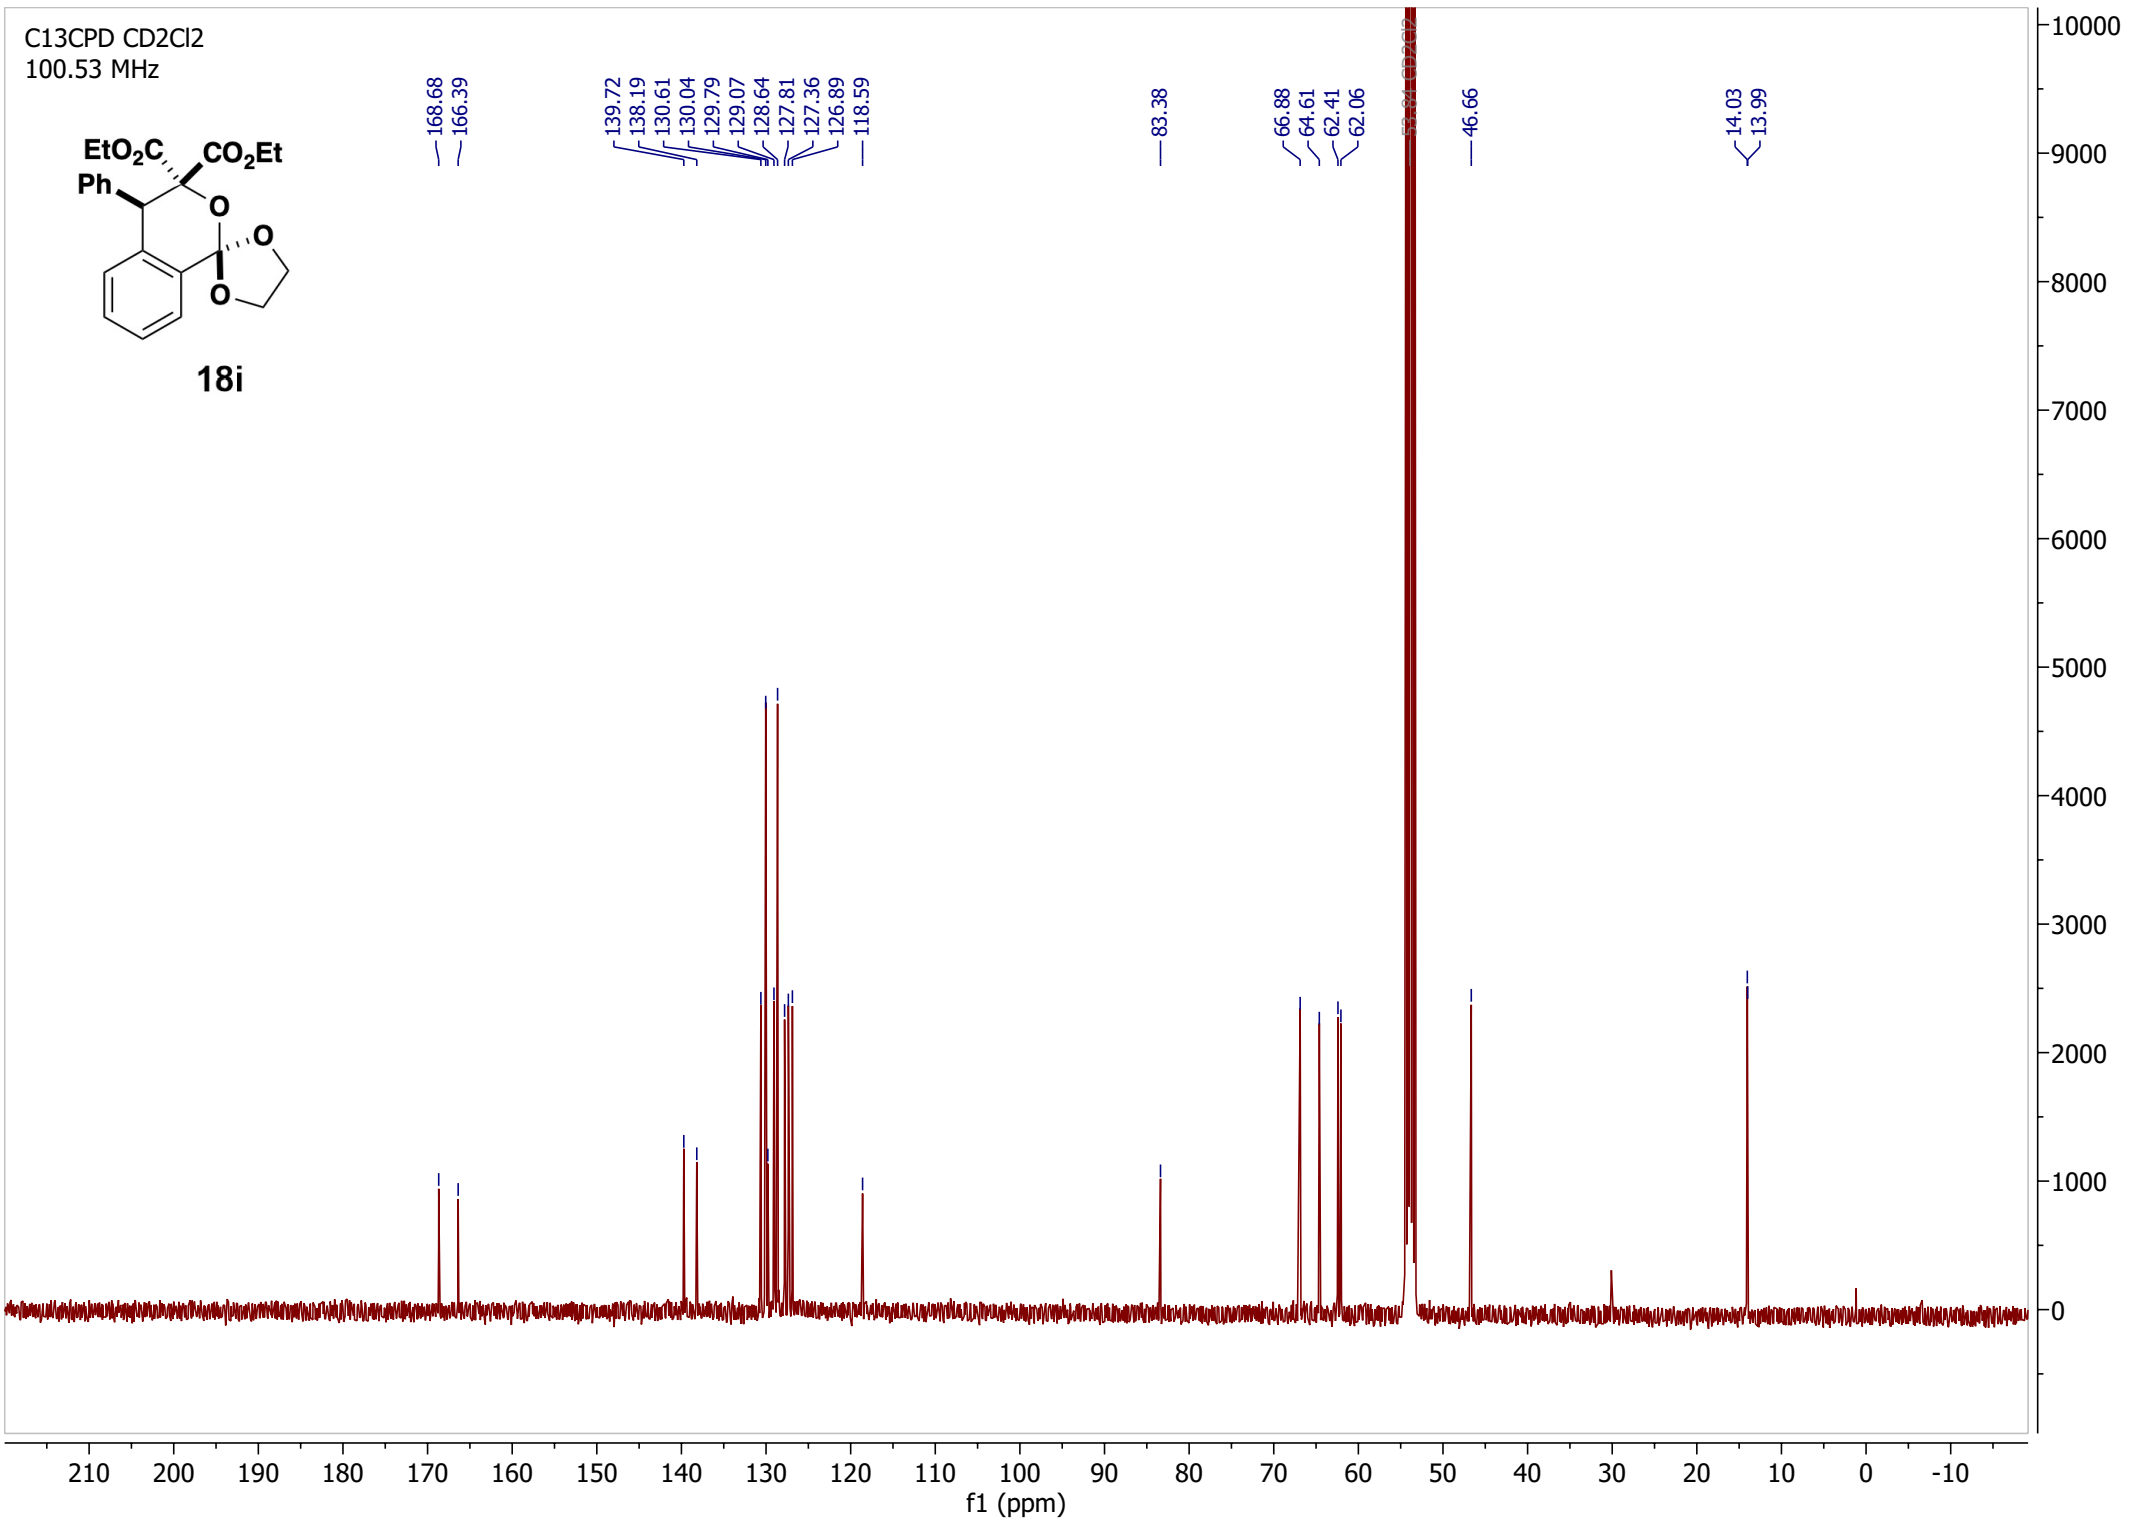

PROTON CDCl3

300.73 MHz

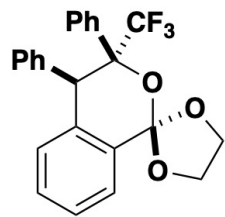

18j

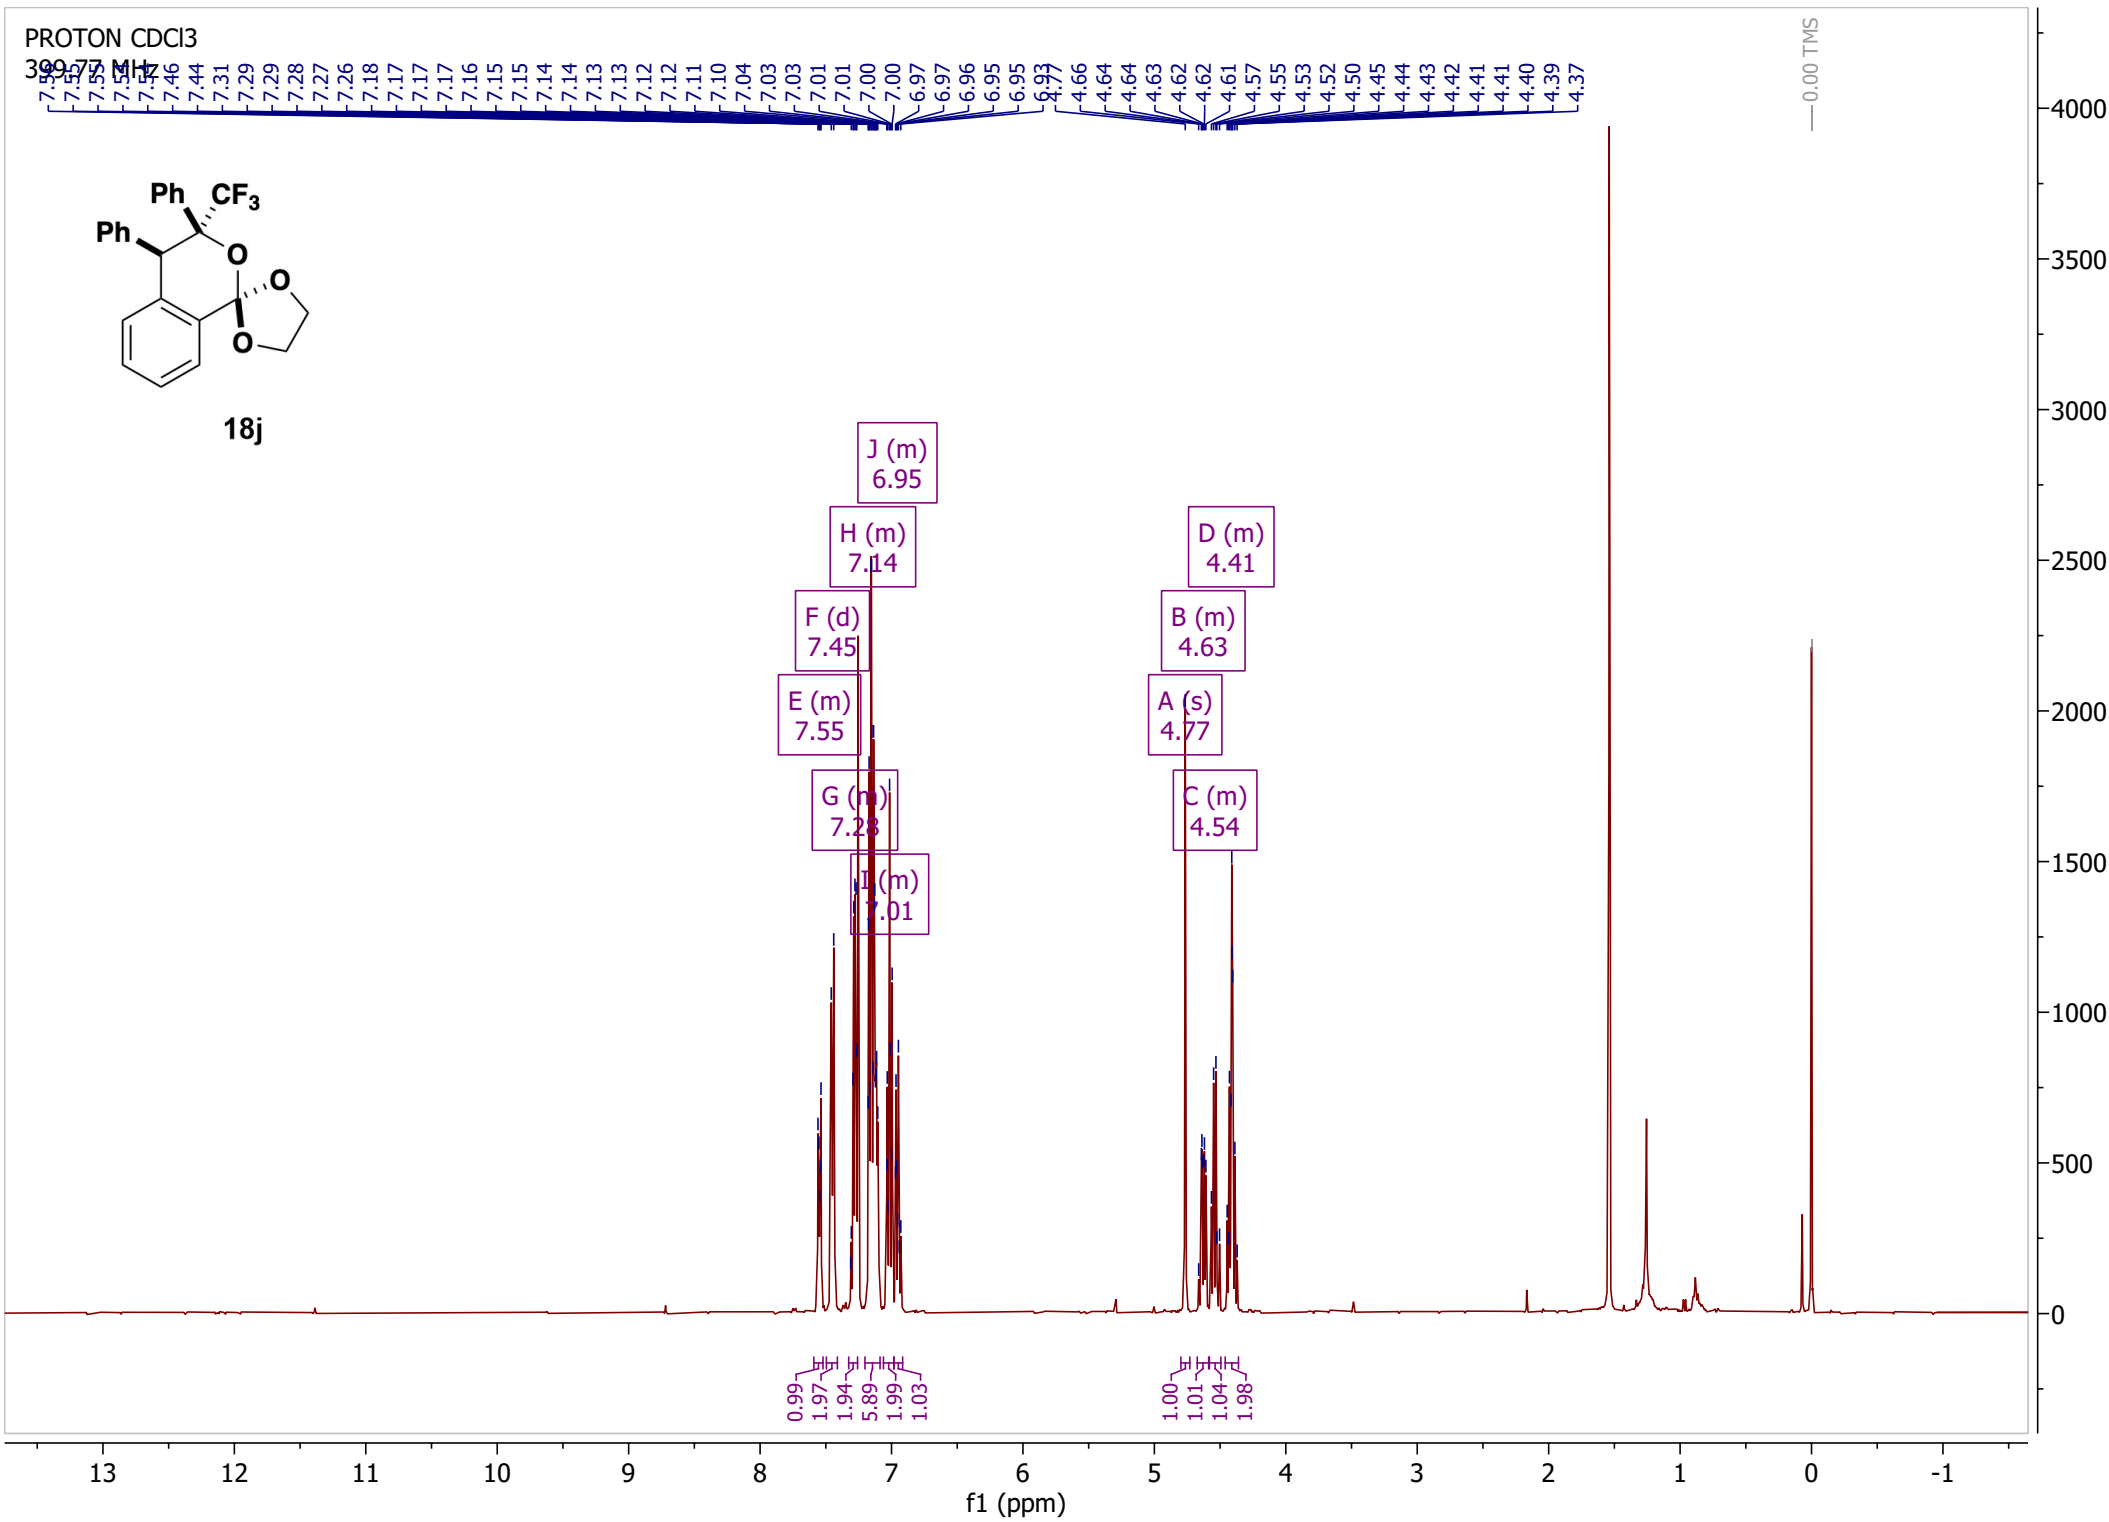

F19CPD CDCl3  
376.12 MHz

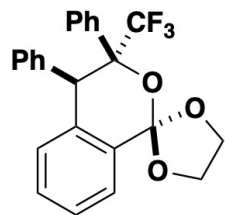

18j

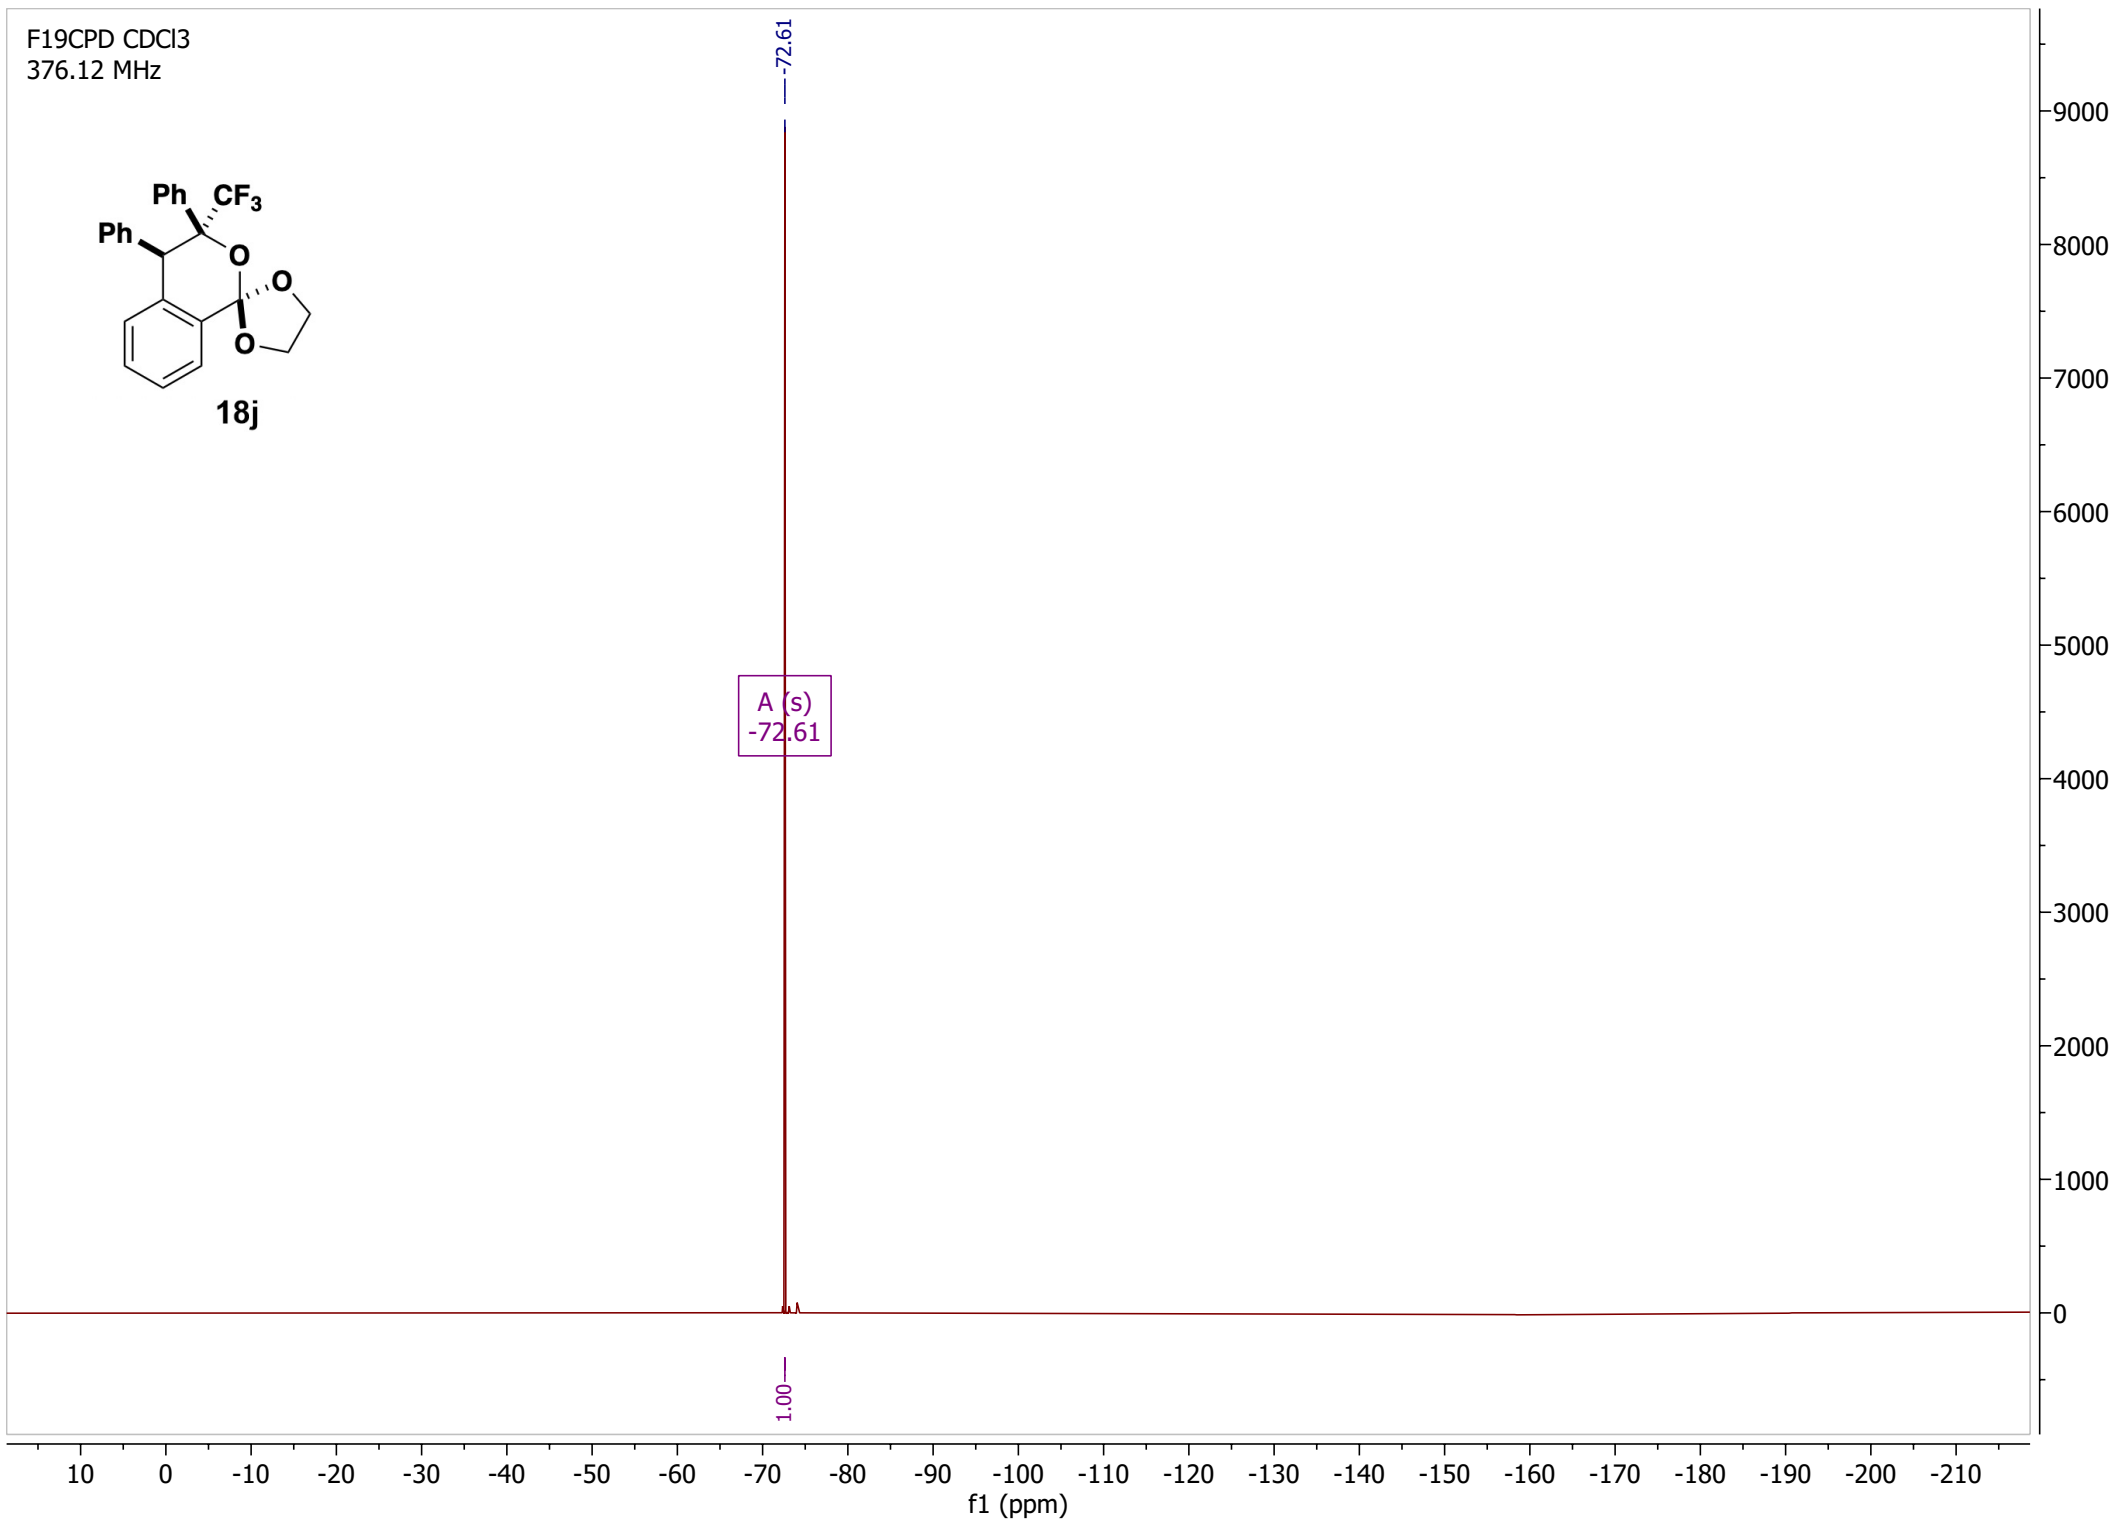



C13CPD CDCl3  
100.53 MHz

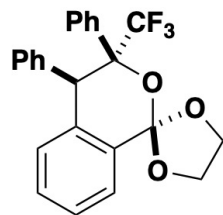

18j

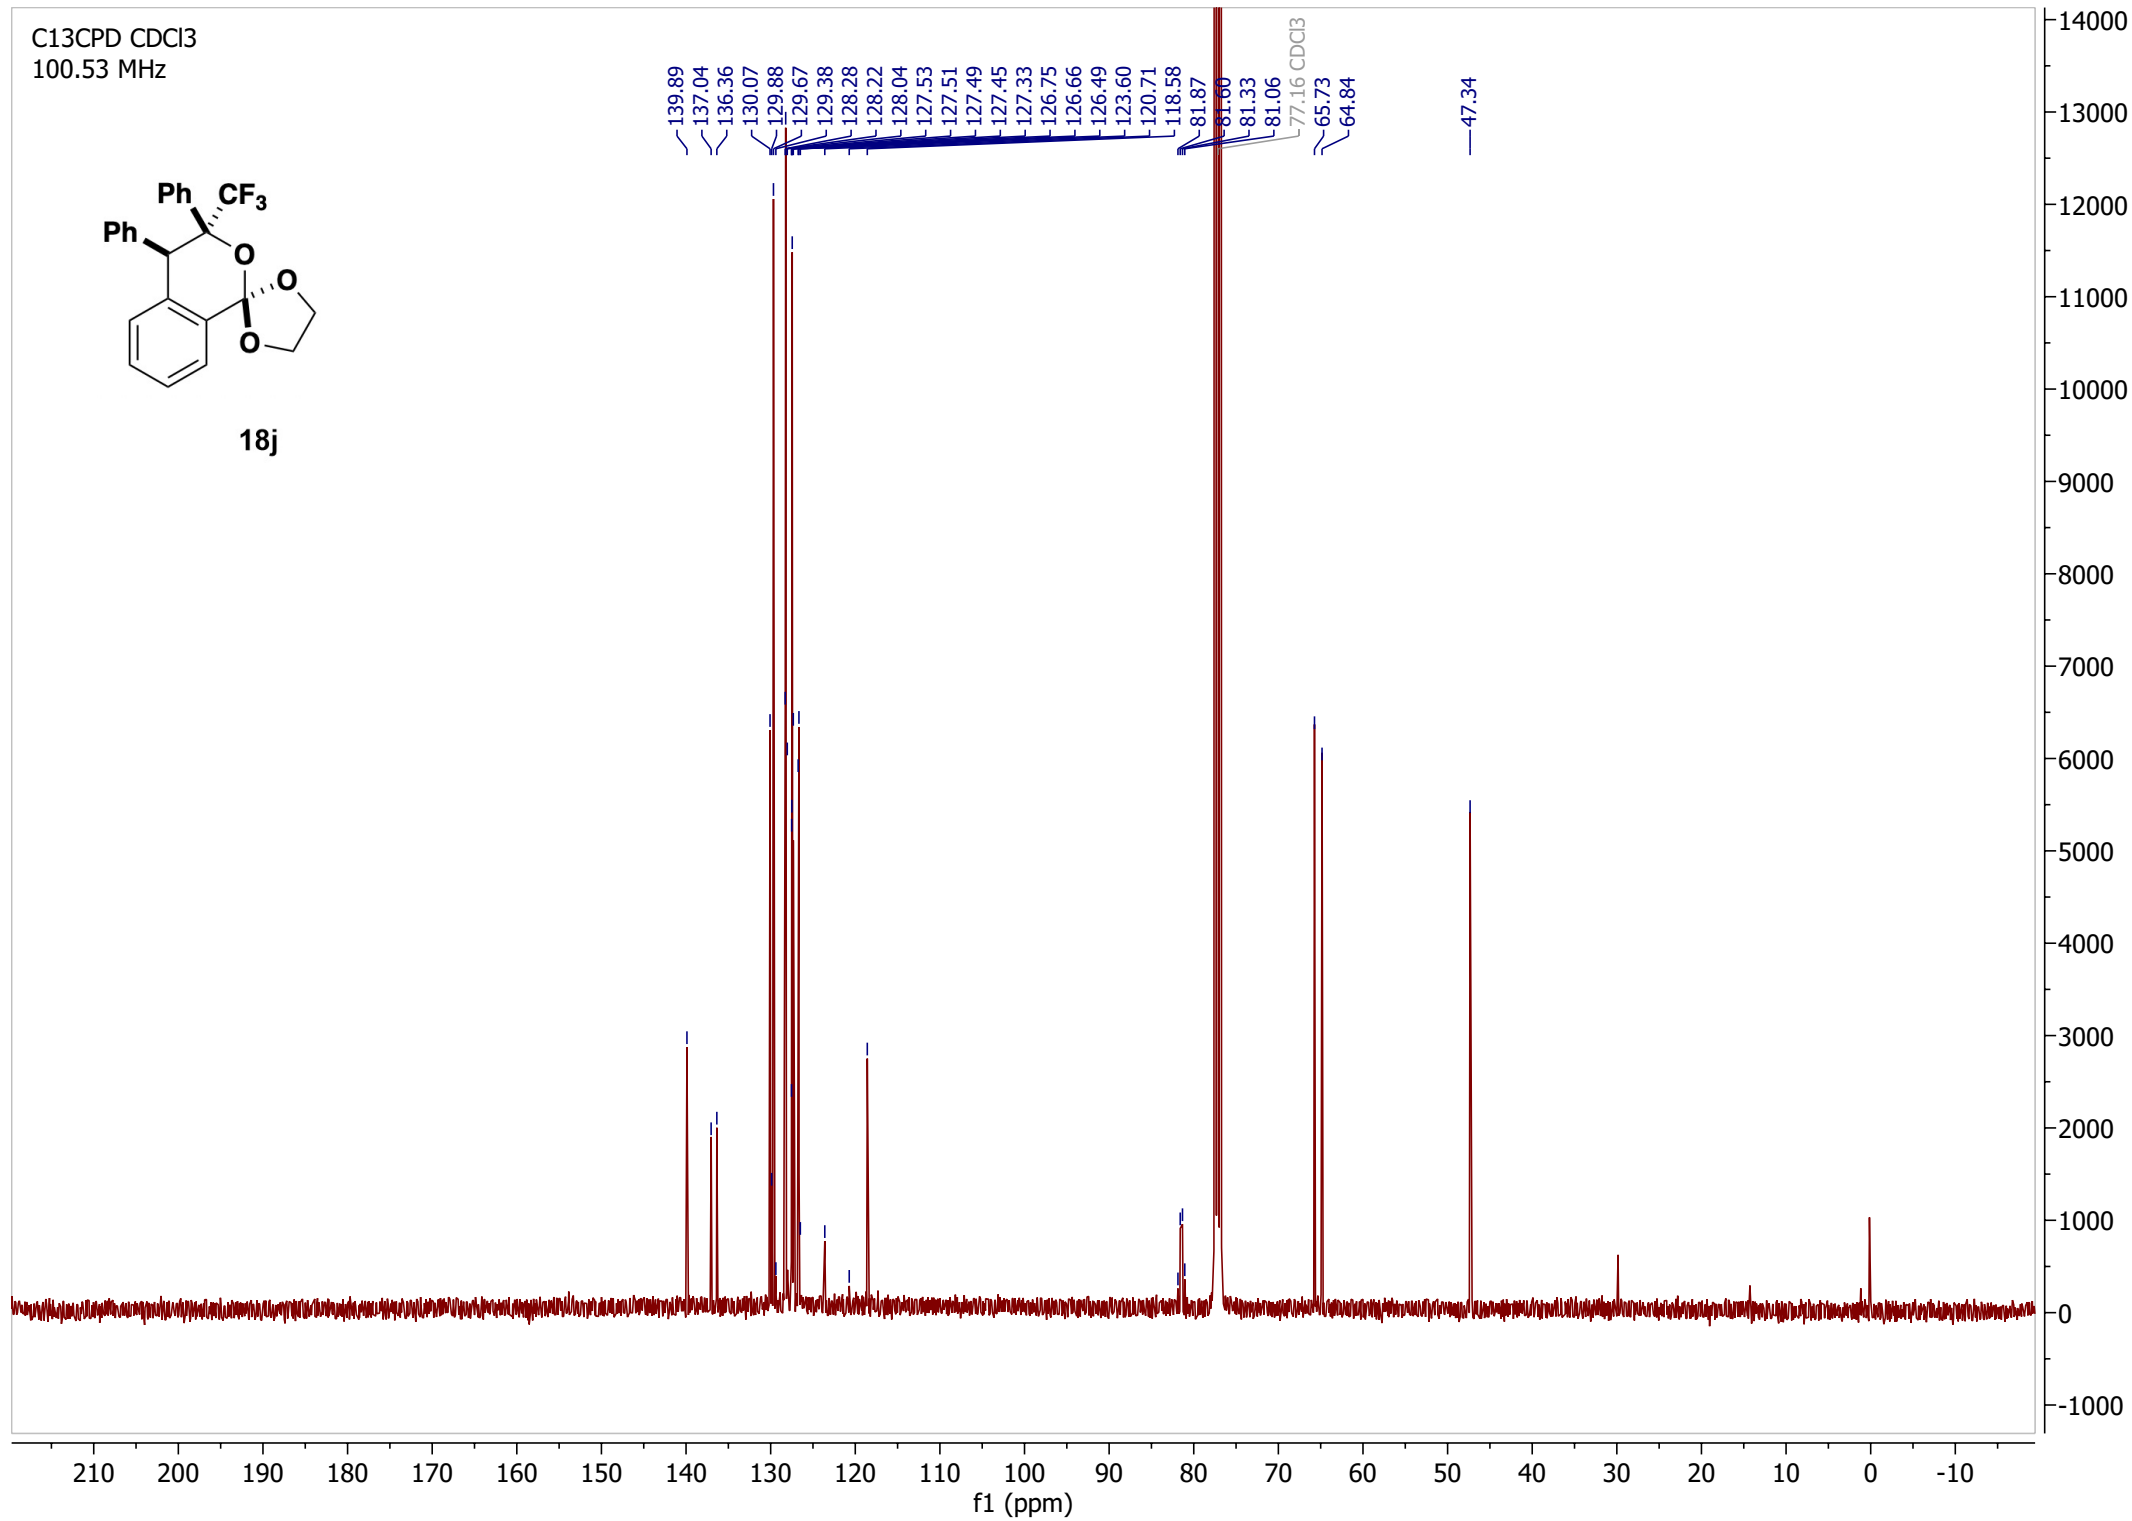

PROTON CD2Cl2  
399.77 MHz

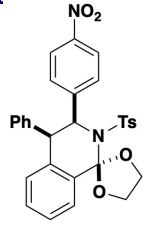

18k

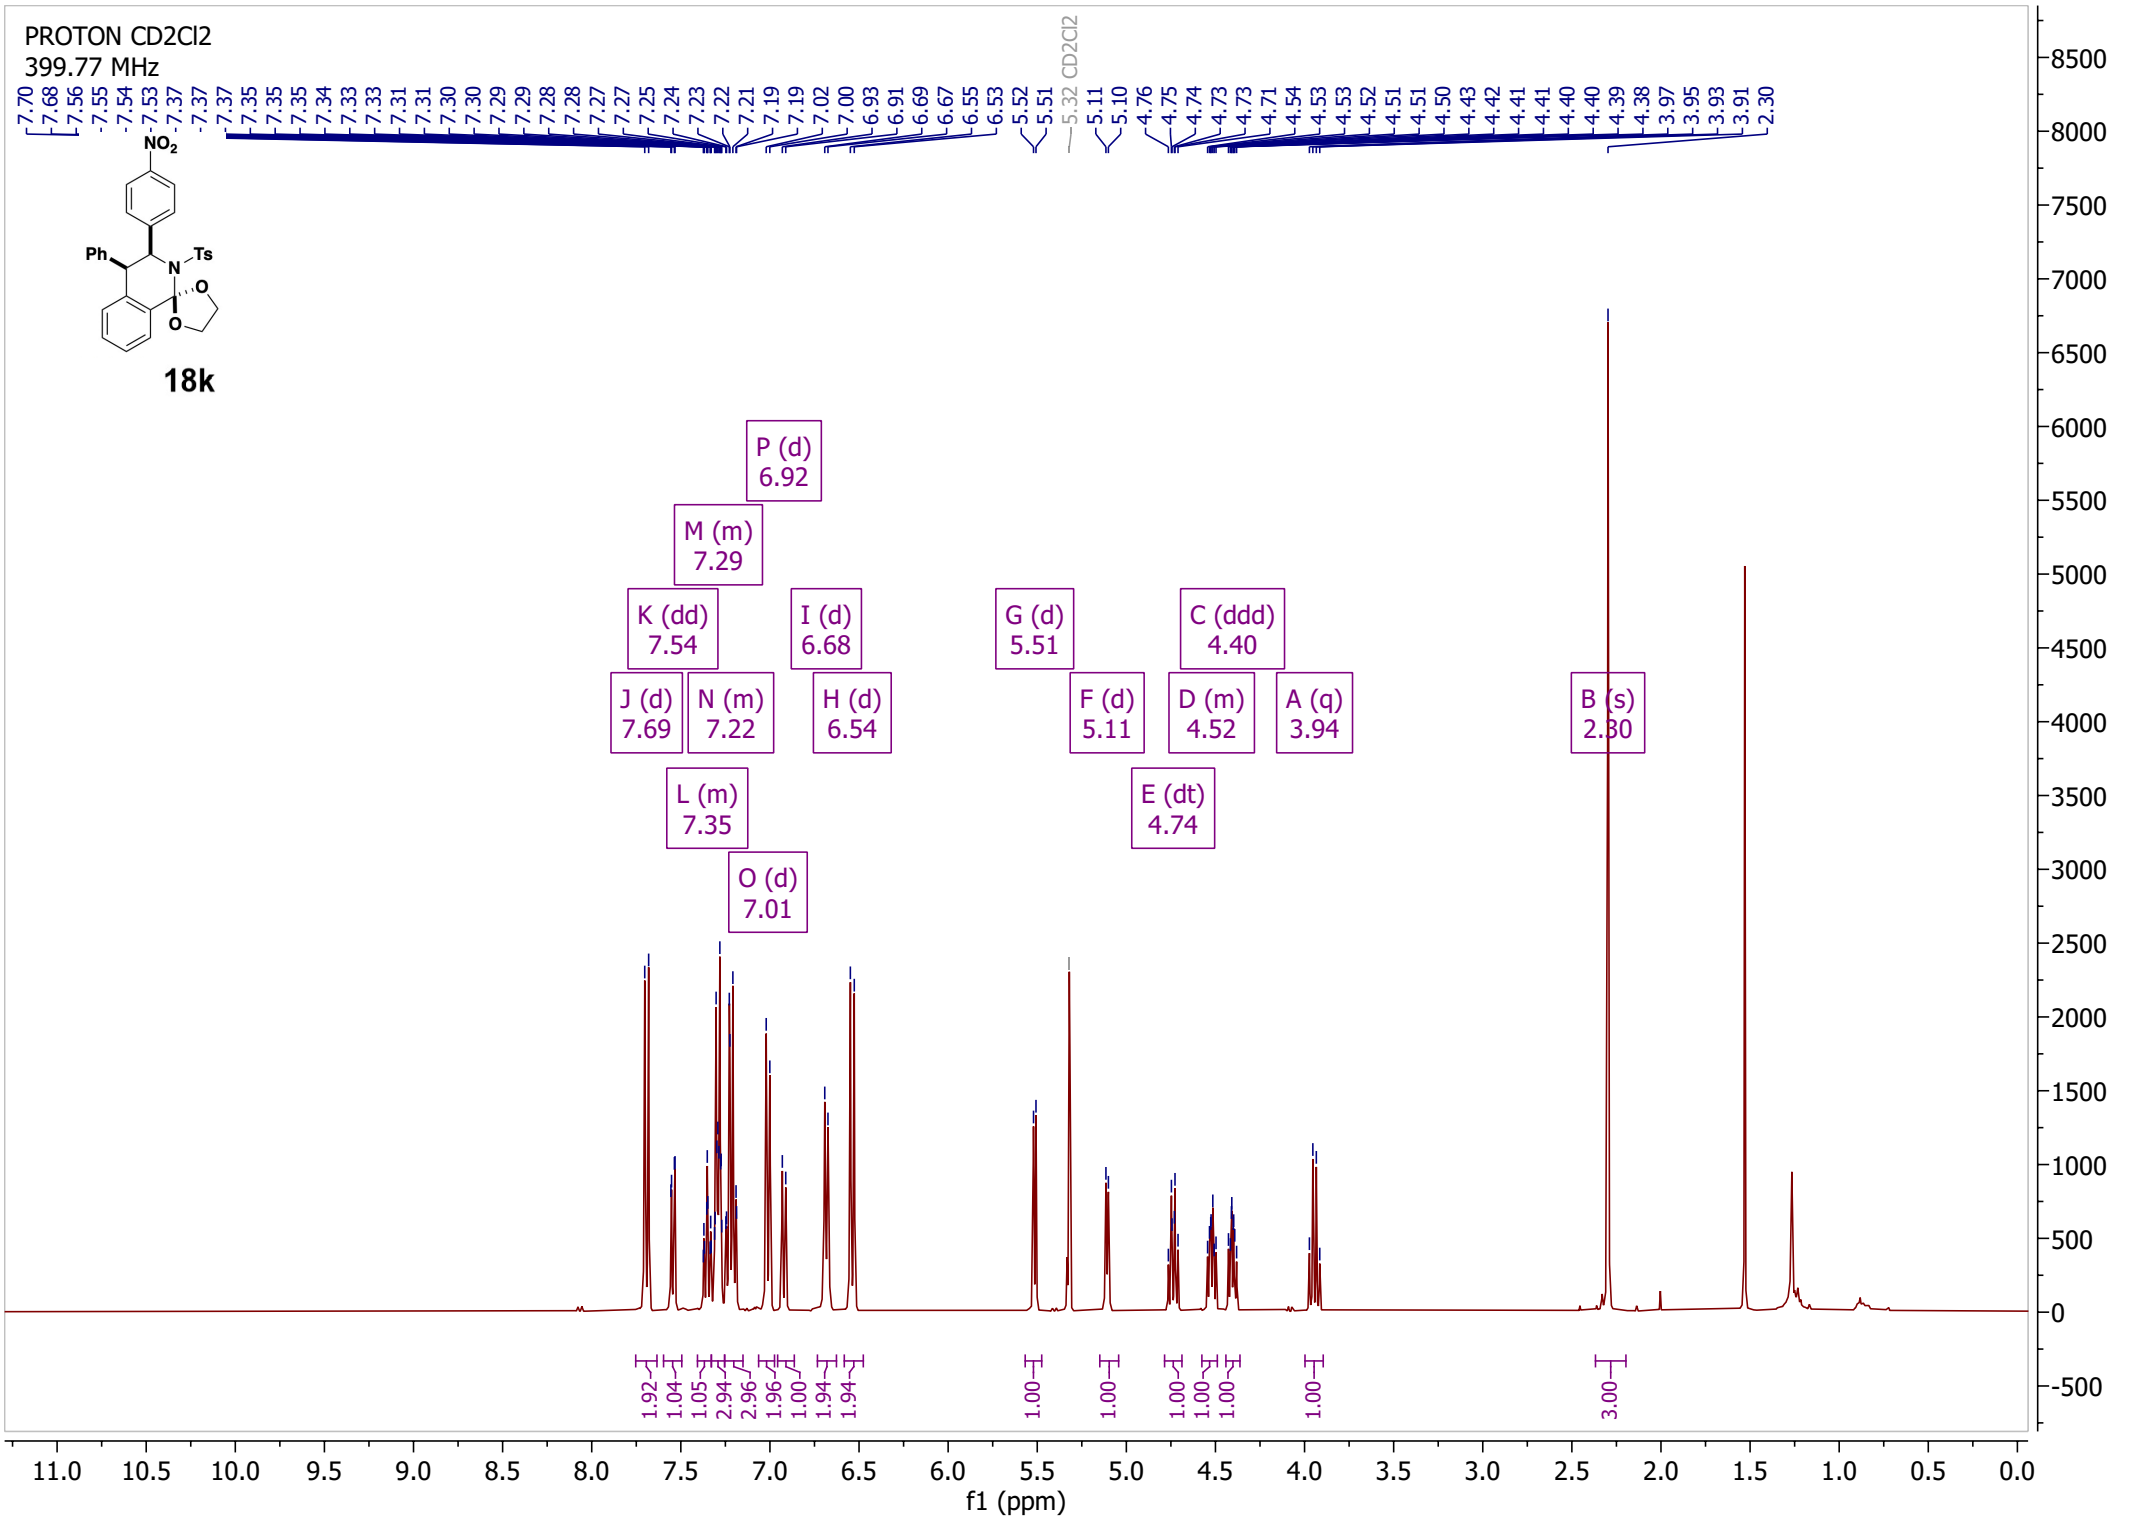

C13CPD CD2Cl2  
100.53 MHz

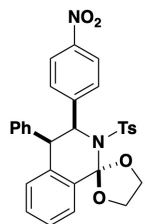

18k

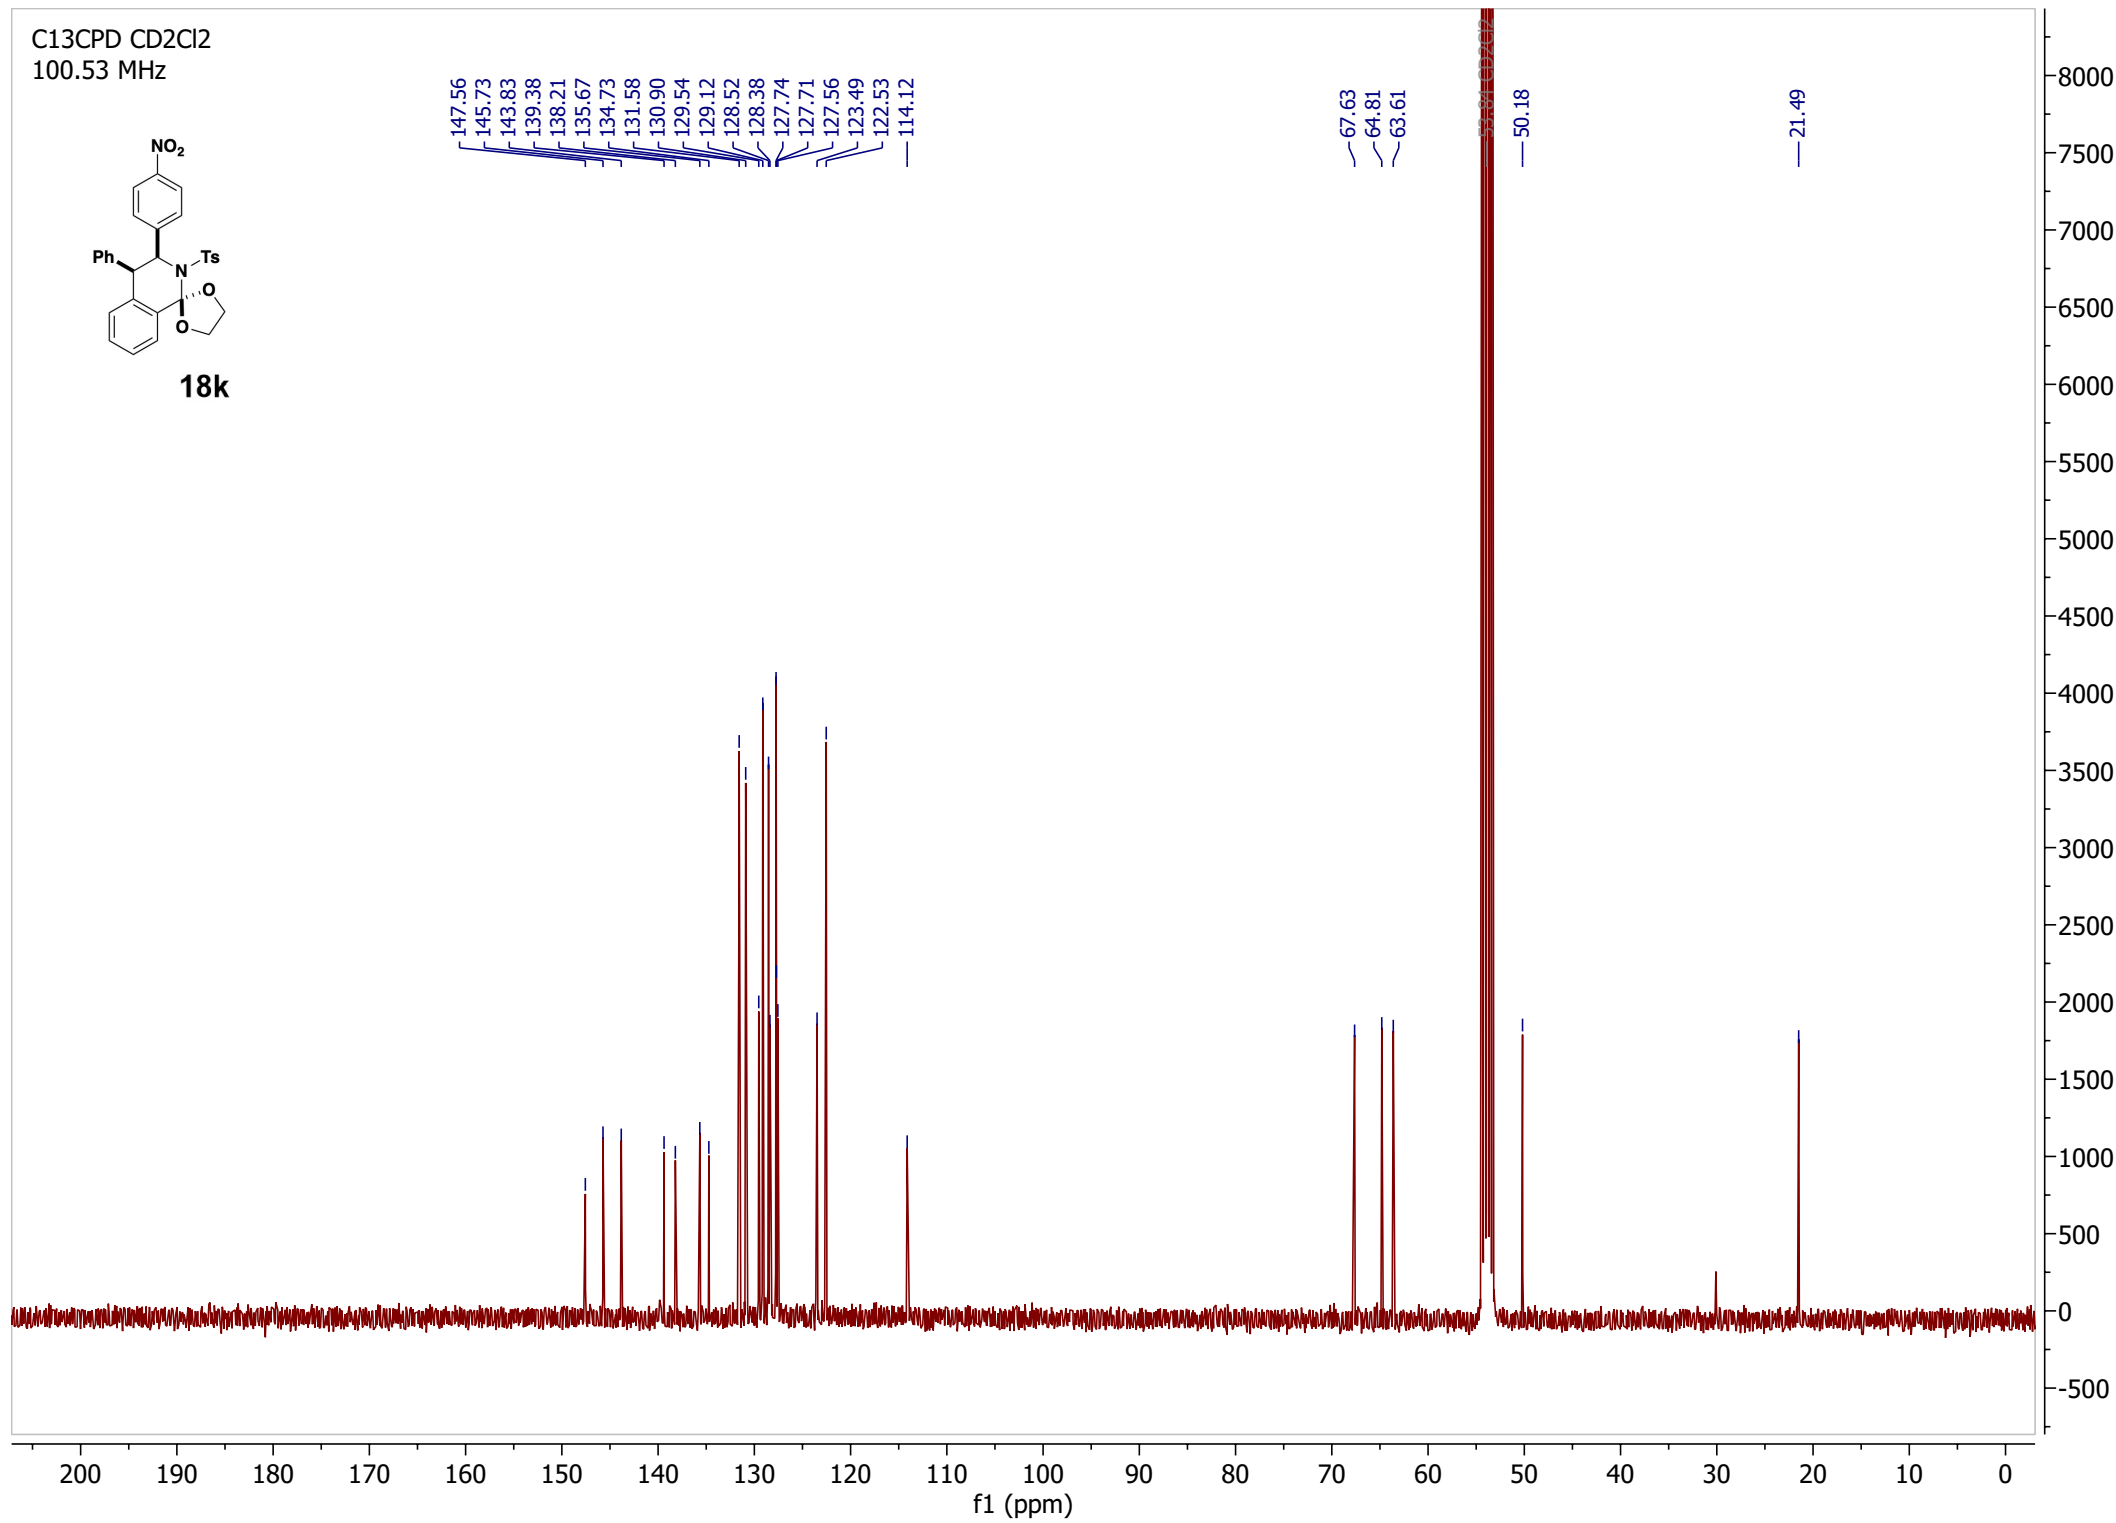

PROTON DMSO-d6 353 K  
500.11 MHz

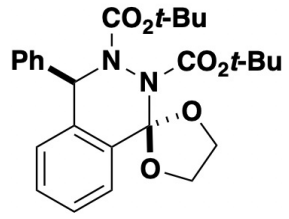

18I

7.56  
7.55  
7.40  
7.38  
7.37  
7.36  
7.35  
7.34  
7.33  
7.33  
7.31  
7.29  
7.12  
7.11  
7.10  
7.05  
7.04  
6.39  
4.49  
4.48  
4.47  
4.34  
4.25  
4.23  
4.22  
4.20  
2.50 DMSO-d6  
1.45  
1.05

H (m) 7.34  
G (d) 7.56  
J (d) 7.05  
I (m) 7.11  
A (s) 6.39  
C (s) 4.34  
B (m) 4.48  
D (m) 4.22  
E (s) 1.45  
F (s) 1.05

1.03  
5.06  
1.99  
0.99  
1.00  
1.00  
1.02  
1.99  
9.09  
9.05

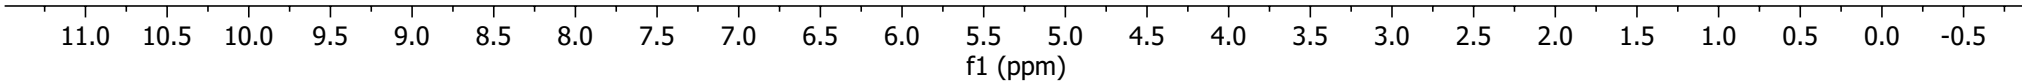

C13CPD DMSO-d6 353 K  
125.77 MHz

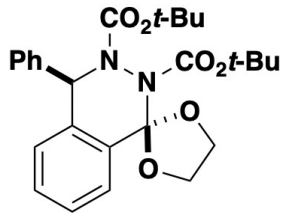

18I

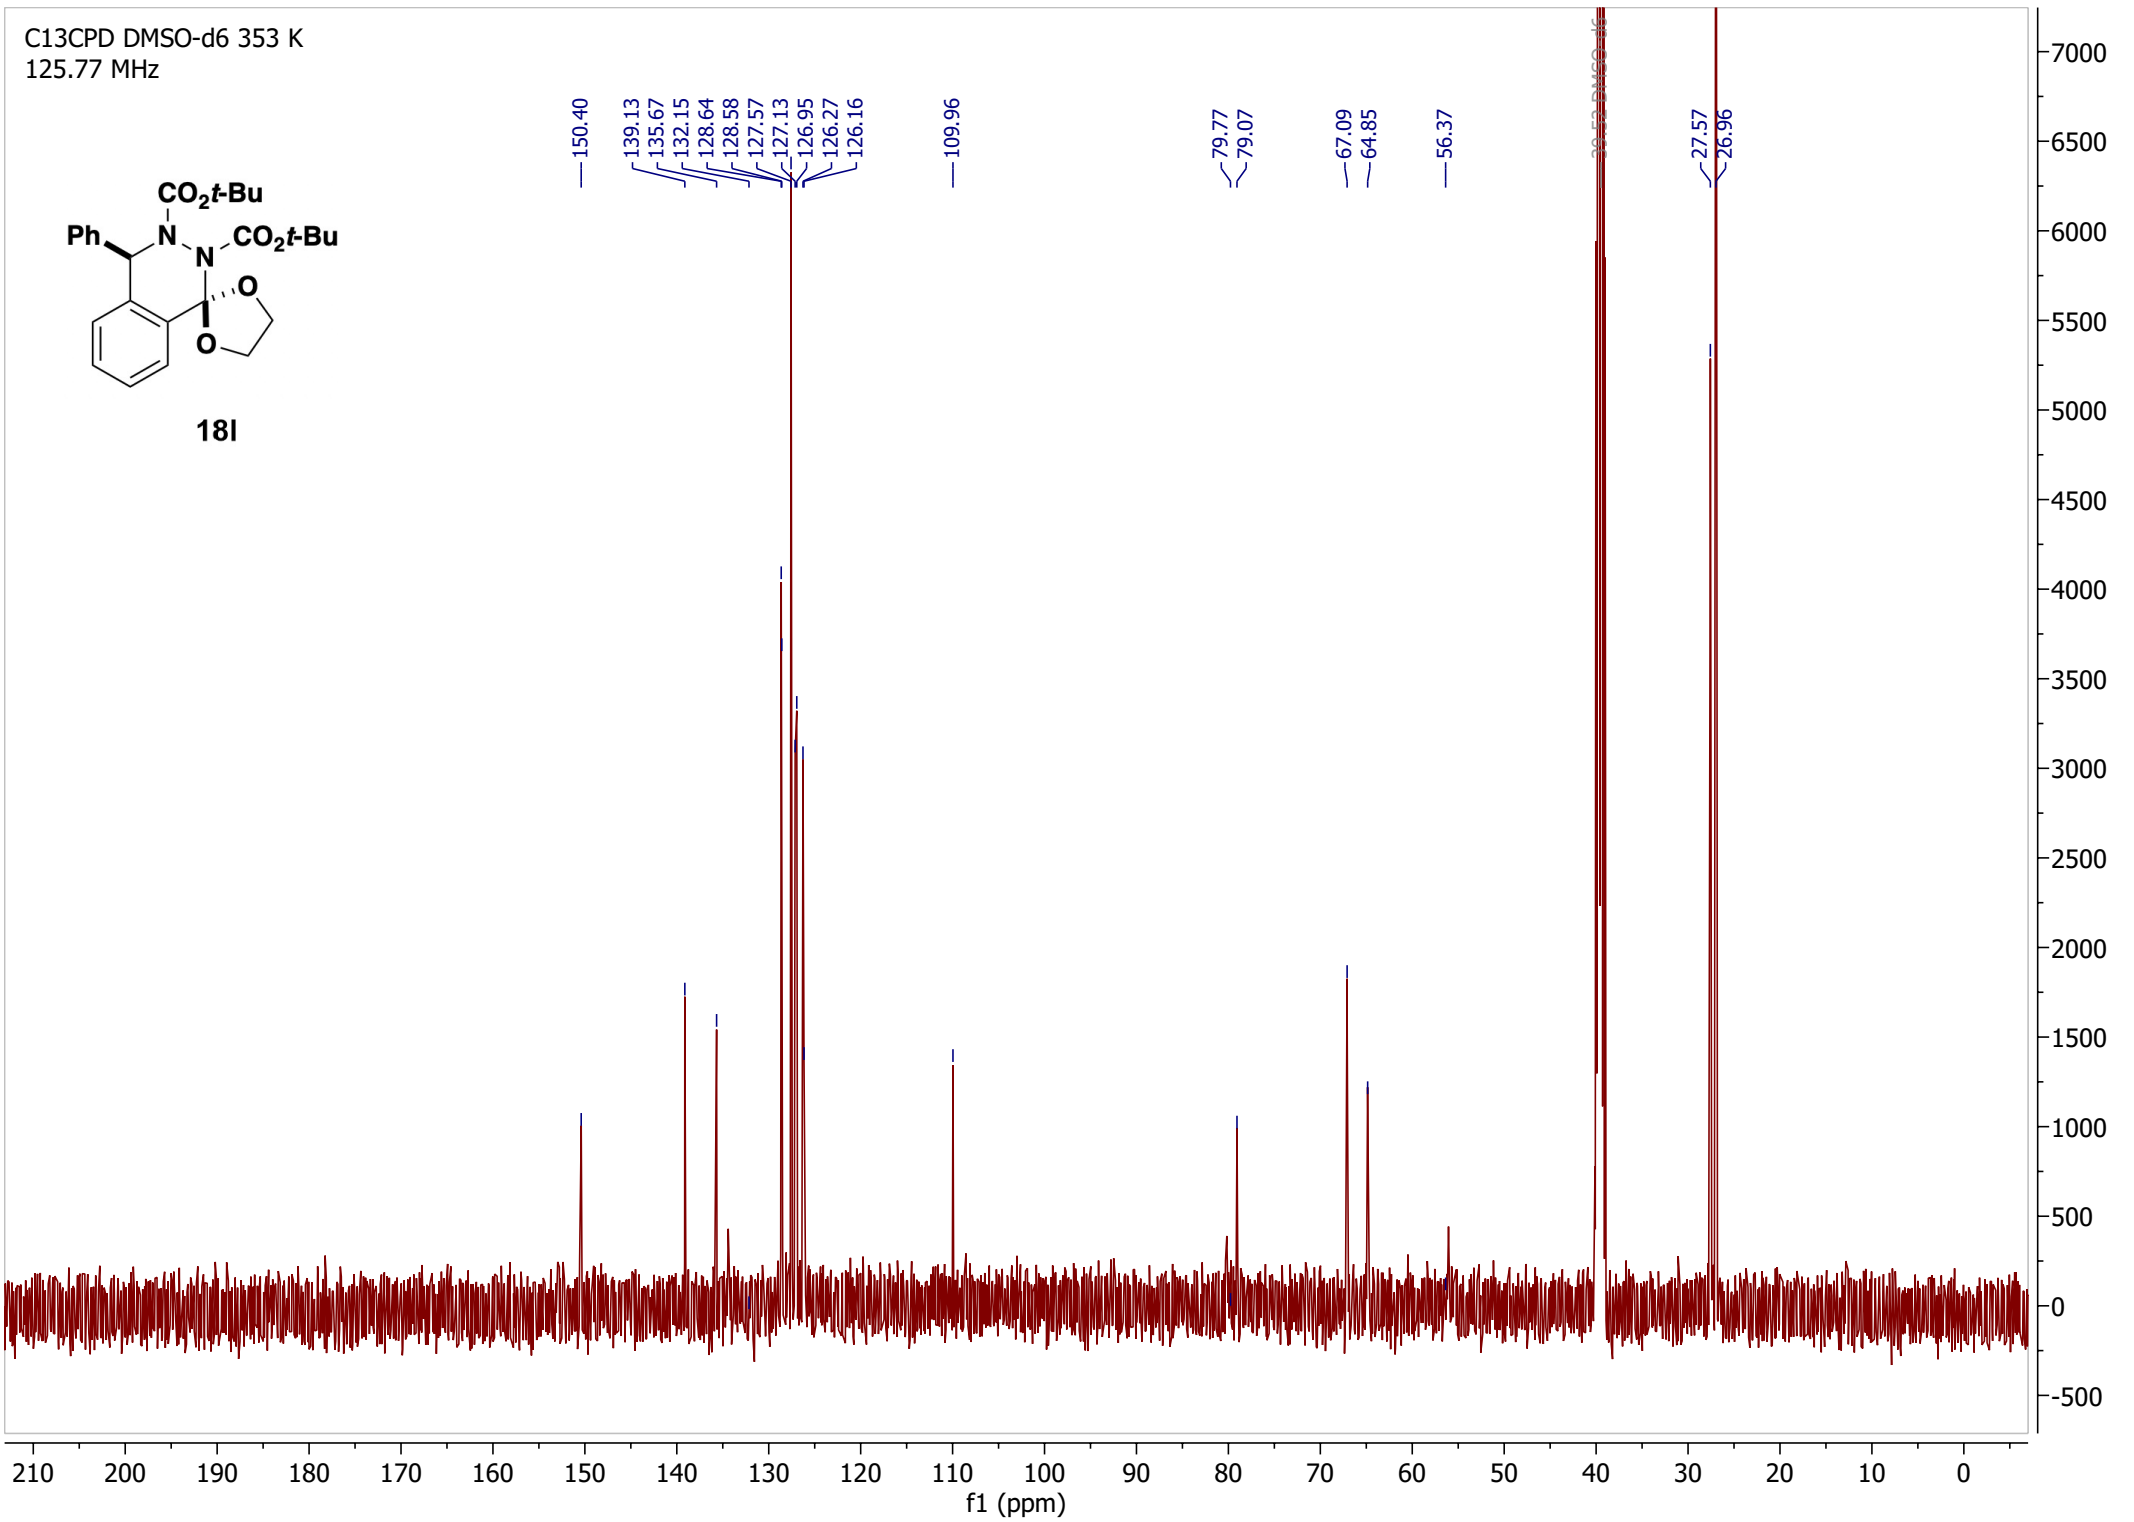

PROTON CDCl3  
399.77 MHz

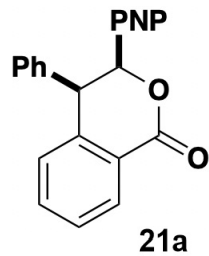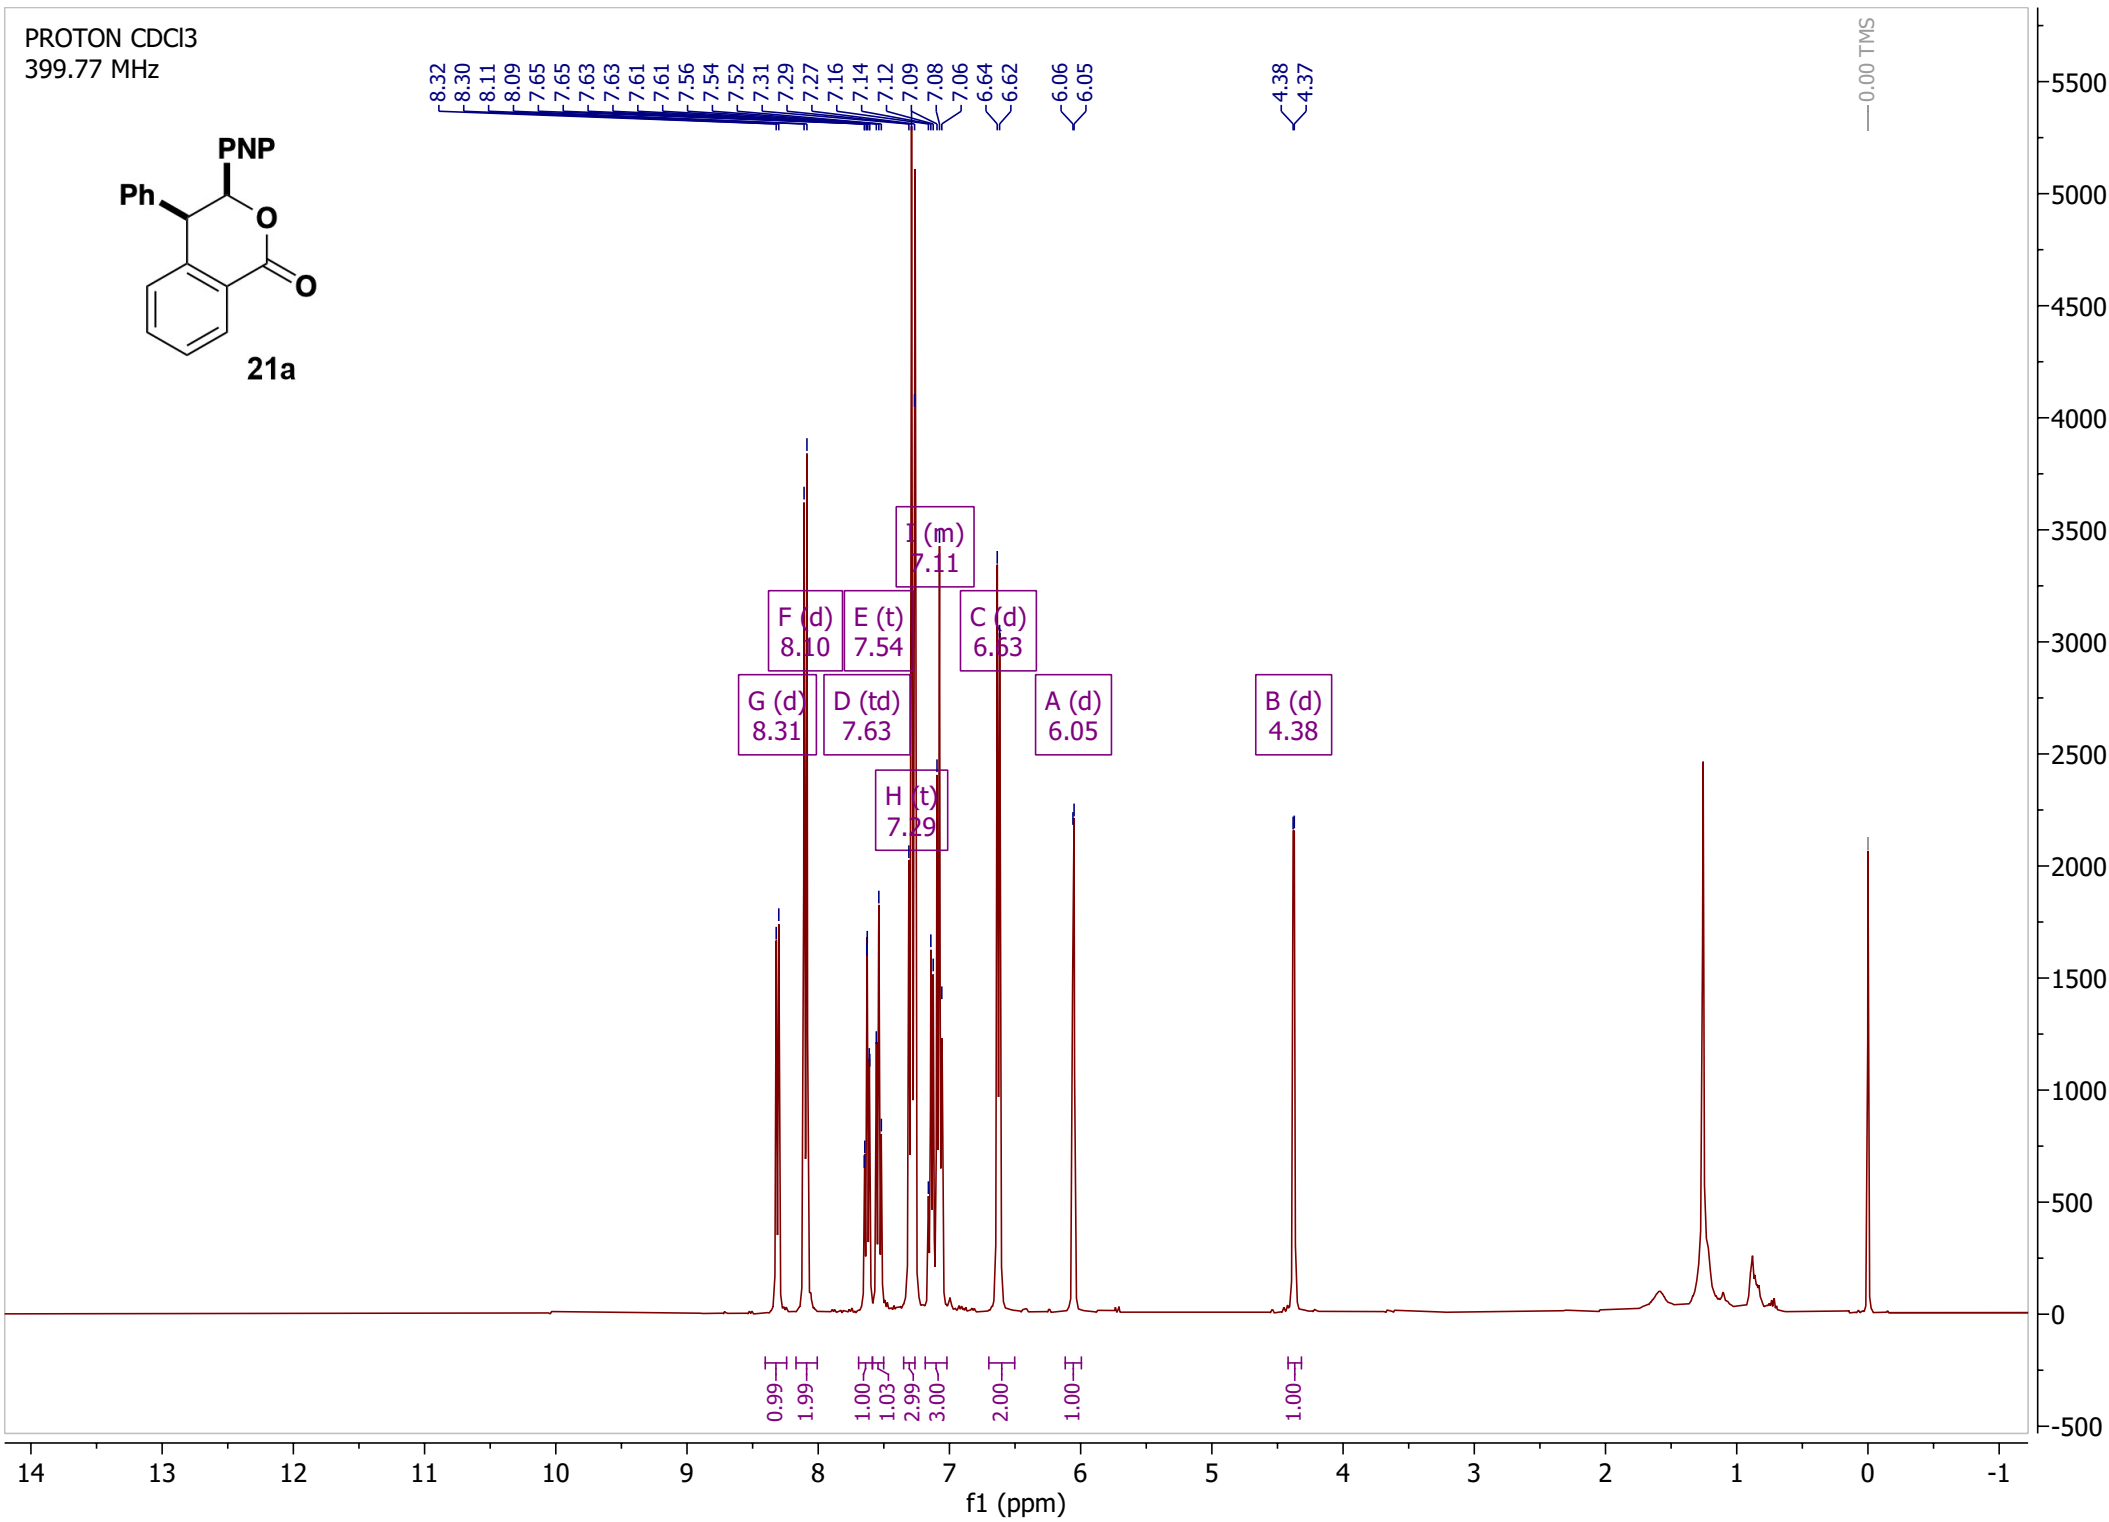

C13CPD CDCl3  
100.53 MHz

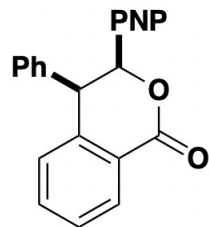

21a

165.14

147.72

144.04

141.69

135.05

134.93

130.73

129.34

128.76

128.54

128.38

127.92

127.26

124.88

123.47

81.25

77.16 CDCl3

50.24

210 200 190 180 170 160 150 140 130 120 110 100 90 80 70 60 50 40 30 20 10 0 -10

f1 (ppm)

10000  
9000  
8000  
7000  
6000  
5000  
4000  
3000  
2000  
1000  
0  
-1000

PROTON CDCl<sub>3</sub>  
399.77 MHz

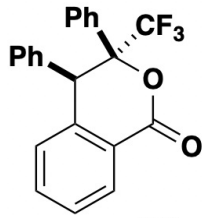

21b

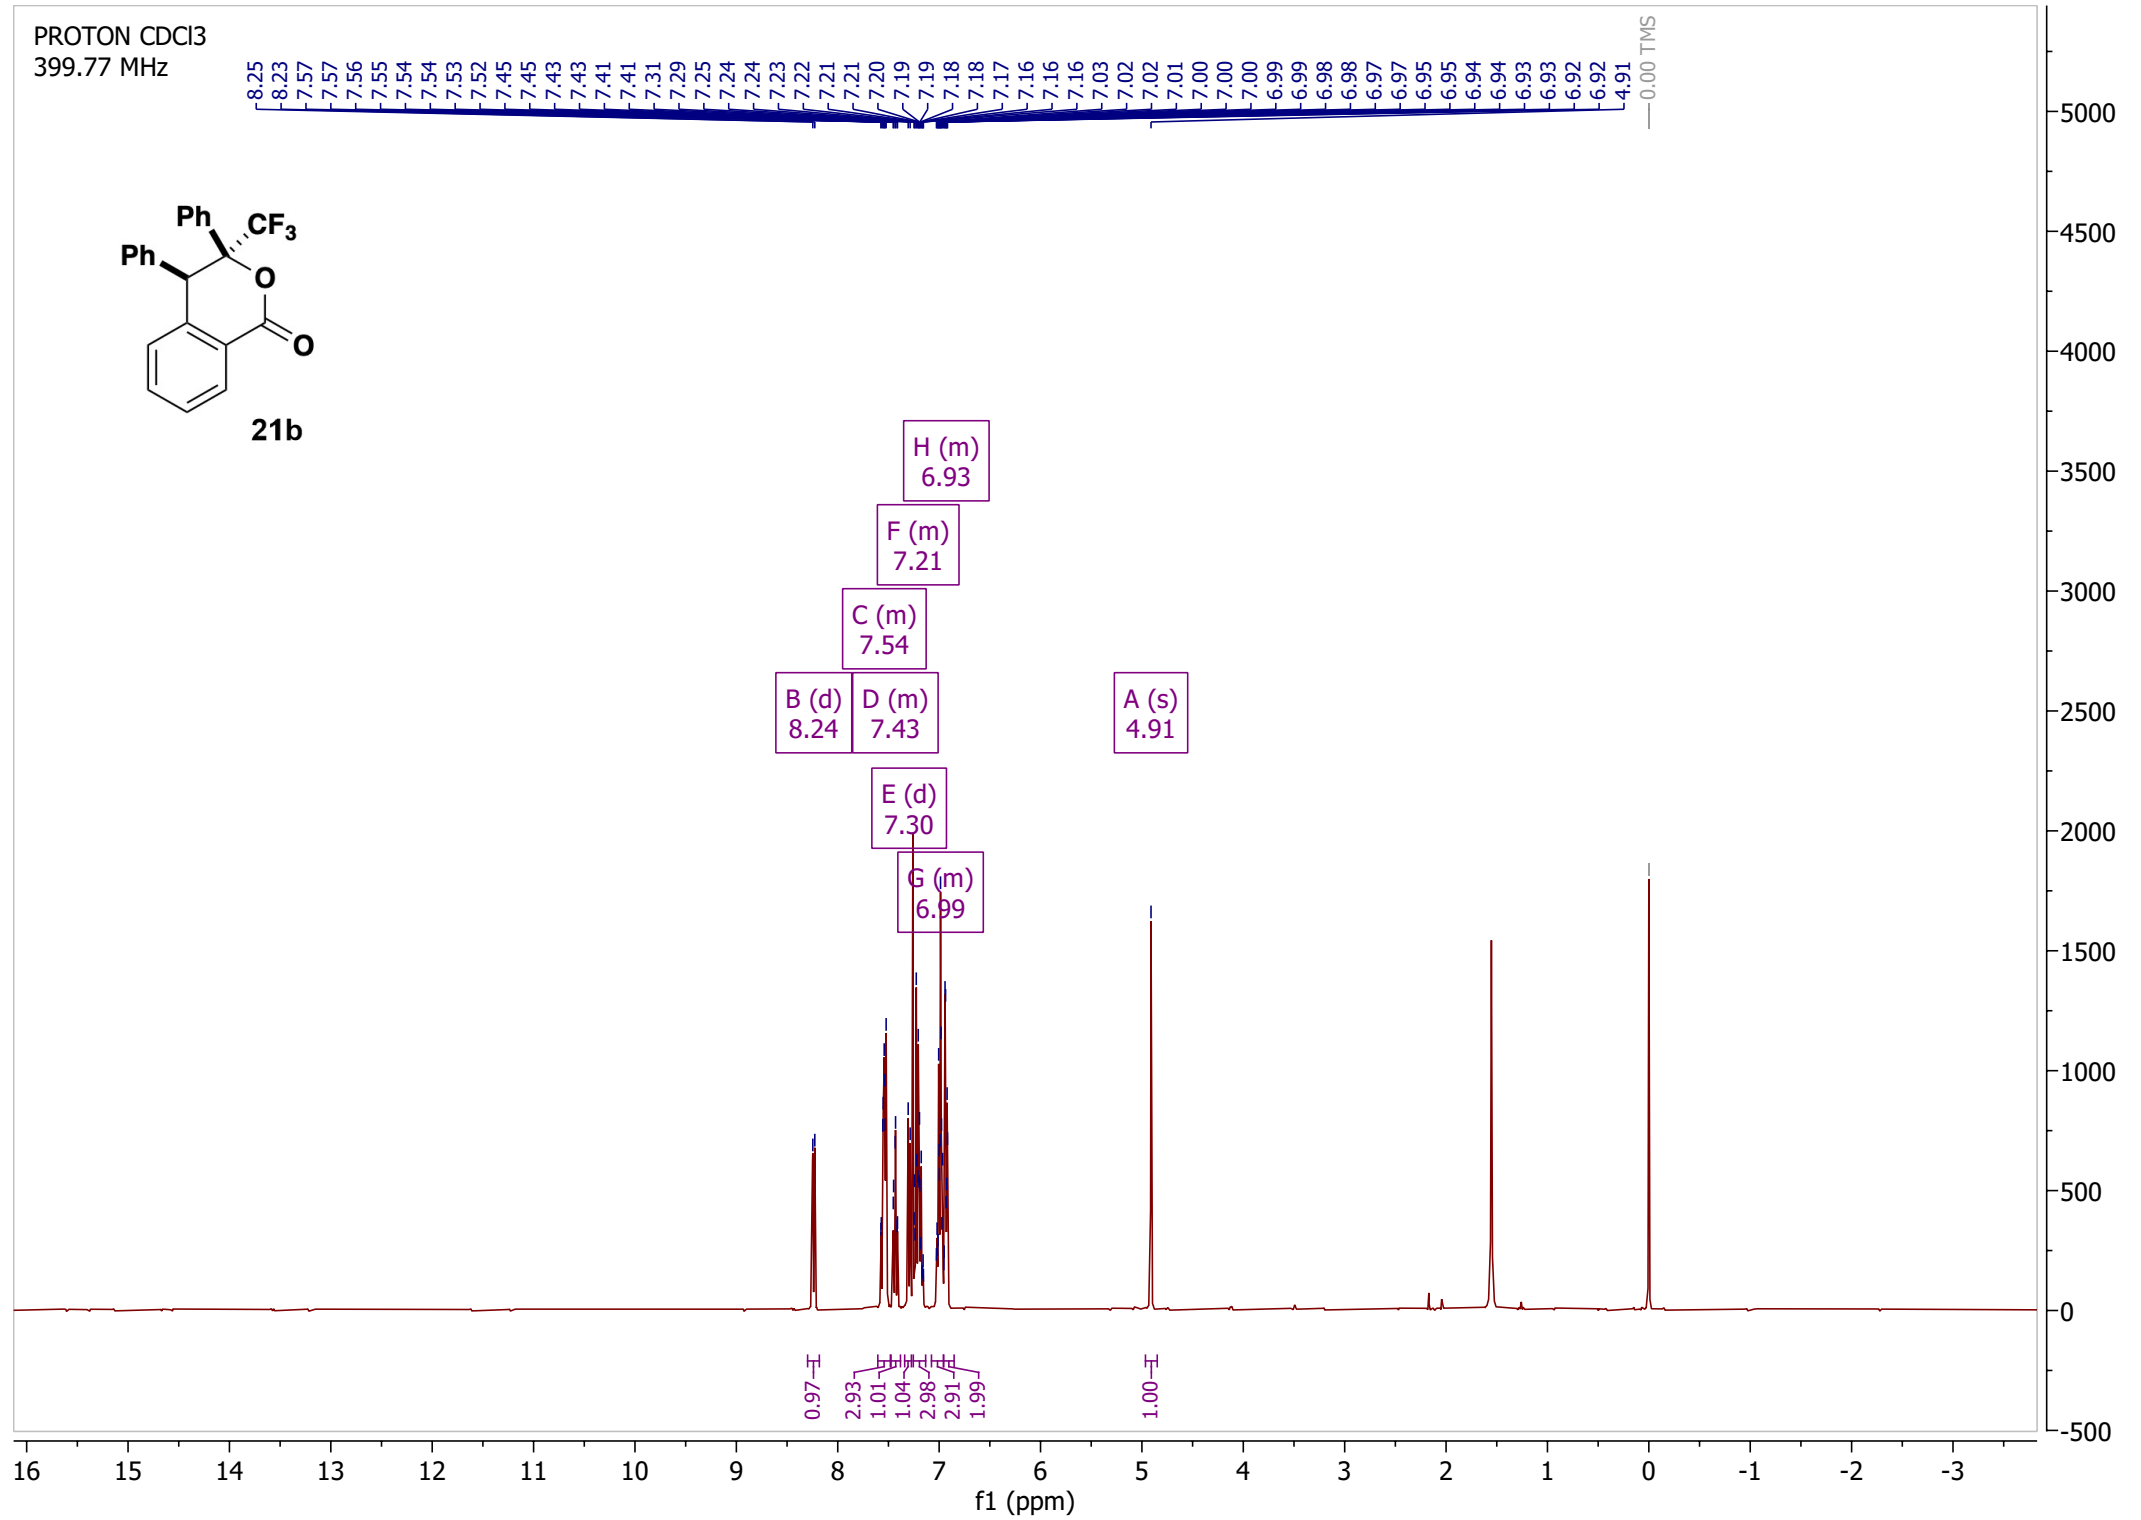



F19CPD CDCl3  
376.12 MHz

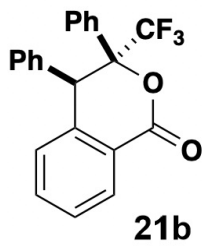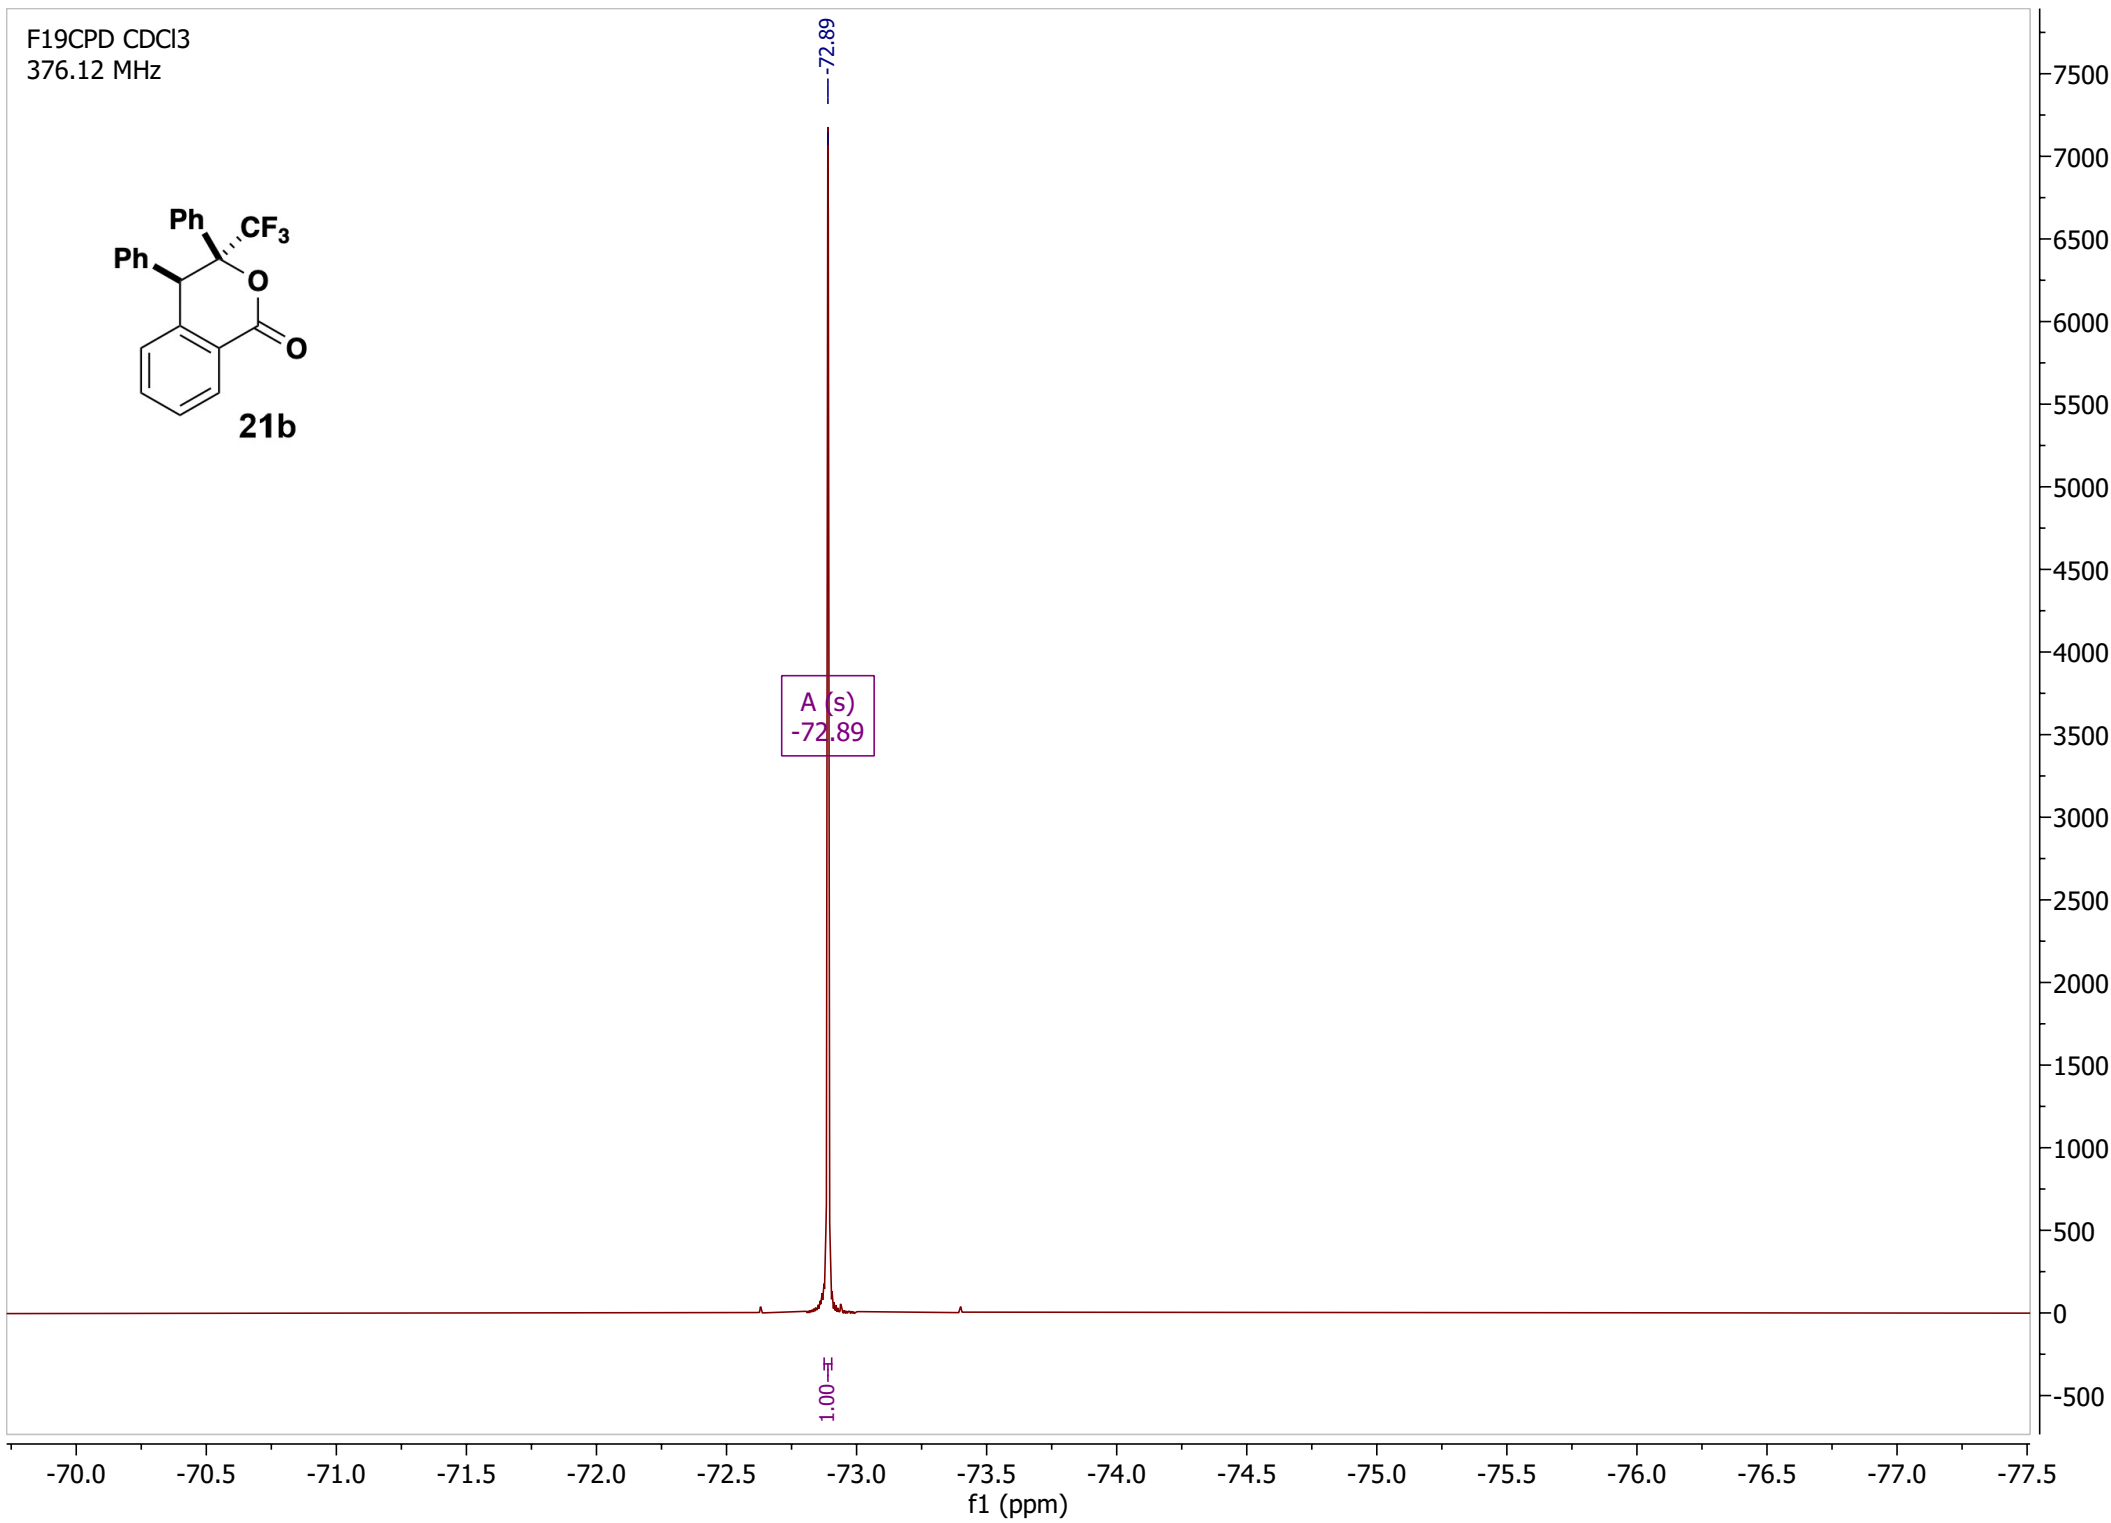

<sup>13</sup>C NMR, 800 MHz  
201.22 MHz

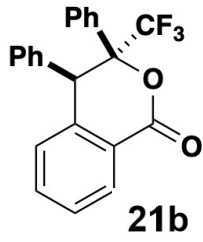

162.89

140.06  
138.29  
135.00  
133.89  
130.17  
128.72  
128.71  
128.32  
128.16  
128.08  
127.41  
126.79  
126.39  
125.35  
123.91  
123.10  
122.48

86.10  
85.97  
85.83  
85.69

77.16  
77.00  
76.84

47.49

190 180 170 160 150 140 130 120 110 100 90 80 70 60 50 40 30 20 10 0

f1 (ppm)

120000  
110000  
100000  
90000  
80000  
70000  
60000  
50000  
40000  
30000  
20000  
10000  
0  
-10000

PROTON CDCl3

399.77 MHz

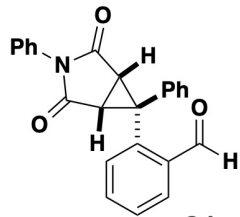

21c

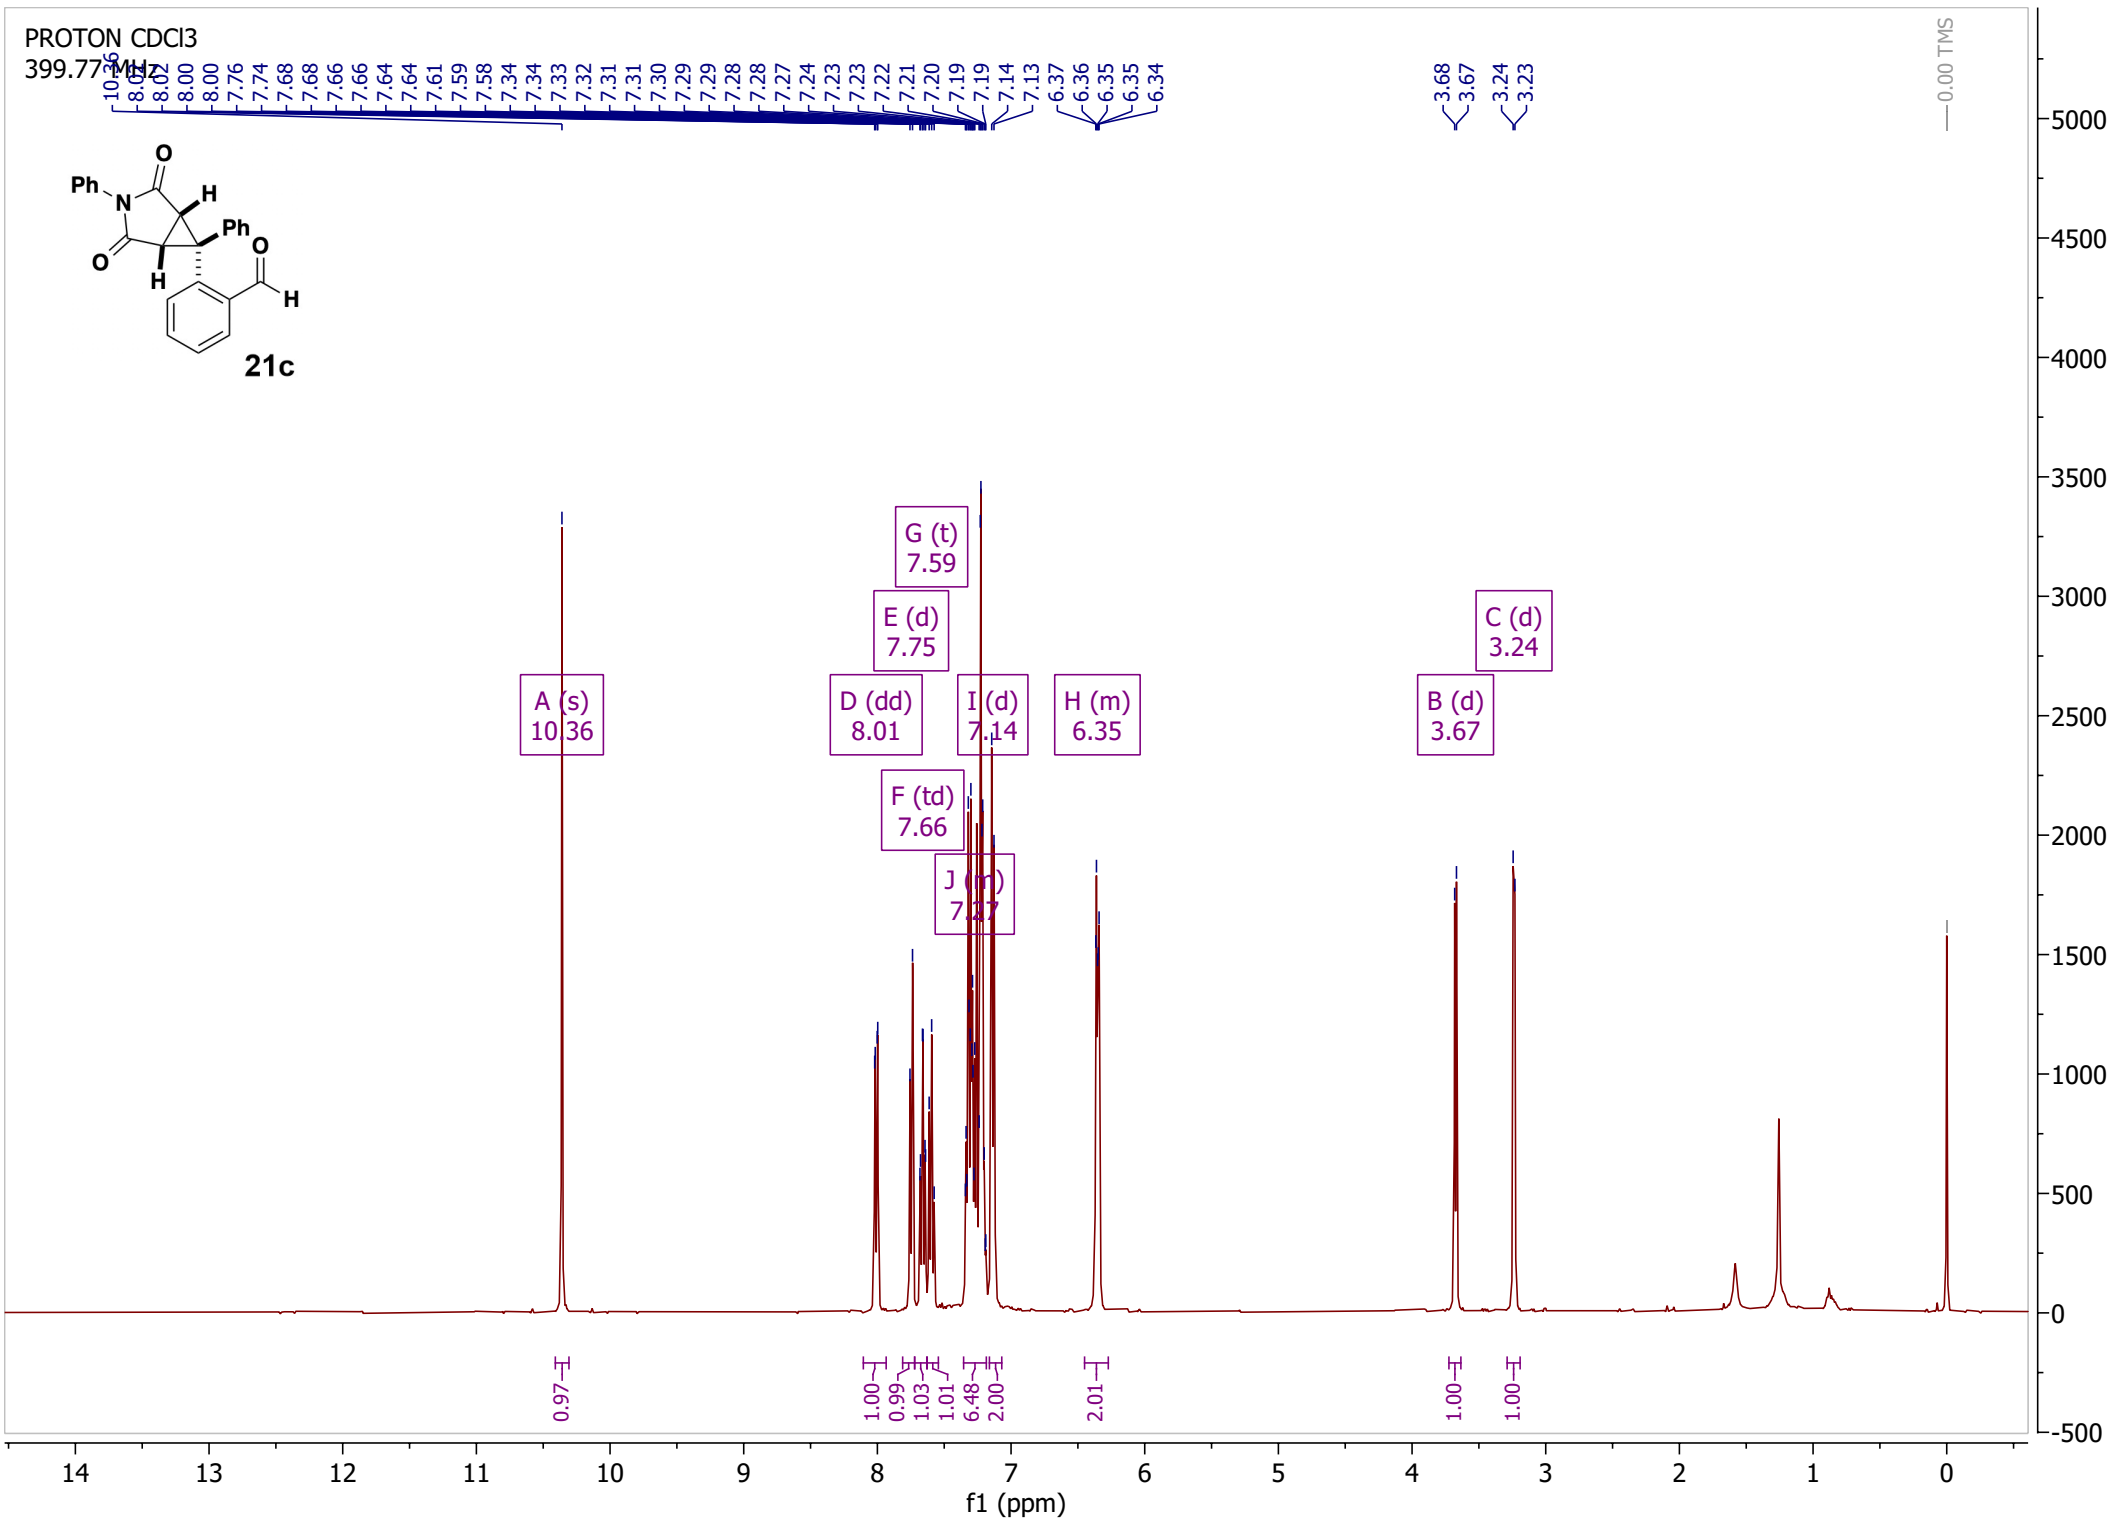

C13CPD CDCl3  
100.53 MHz

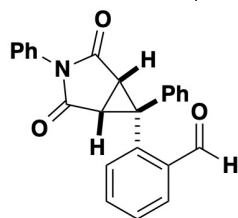

**21c**

-189.85

171.81  
171.37

140.09  
137.17  
135.46  
134.68  
132.09  
131.43  
130.94  
129.54  
129.19  
129.10  
128.73  
128.21  
126.38  
126.24

77.46  
77.00  
76.54

46.33

35.94  
35.47

210 200 190 180 170 160 150 140 130 120 110 100 90 80 70 60 50 40 30 20 10 0 -10

f1 (ppm)

11000  
10000  
9000  
8000  
7000  
6000  
5000  
4000  
3000  
2000  
1000  
0  
-1000

7.52 7.50 7.50 7.47 7.46 7.46 7.45 7.44 7.43 7.43 7.42 7.41 7.41 7.41 7.40 7.39 7.39 7.37 7.37 7.36 7.36 7.35 7.35 7.33 7.33 7.33 7.32 7.32 7.31 7.31 7.30 7.30 7.30 7.29 7.29 7.29 7.28 7.28 7.27 7.27 7.26 7.26 7.25 7.25 7.24 7.24 7.23 7.23 7.22 7.22 7.21 7.21 7.20 7.20 7.19 7.19 7.19 7.01 7.00 7.00 6.99 6.98 6.98 4.83 4.81 4.70 4.68 3.89 3.87 3.87 3.85 3.72 3.70 3.69 3.68 3.47

-0.00 TMS

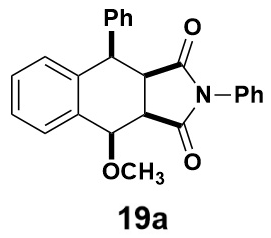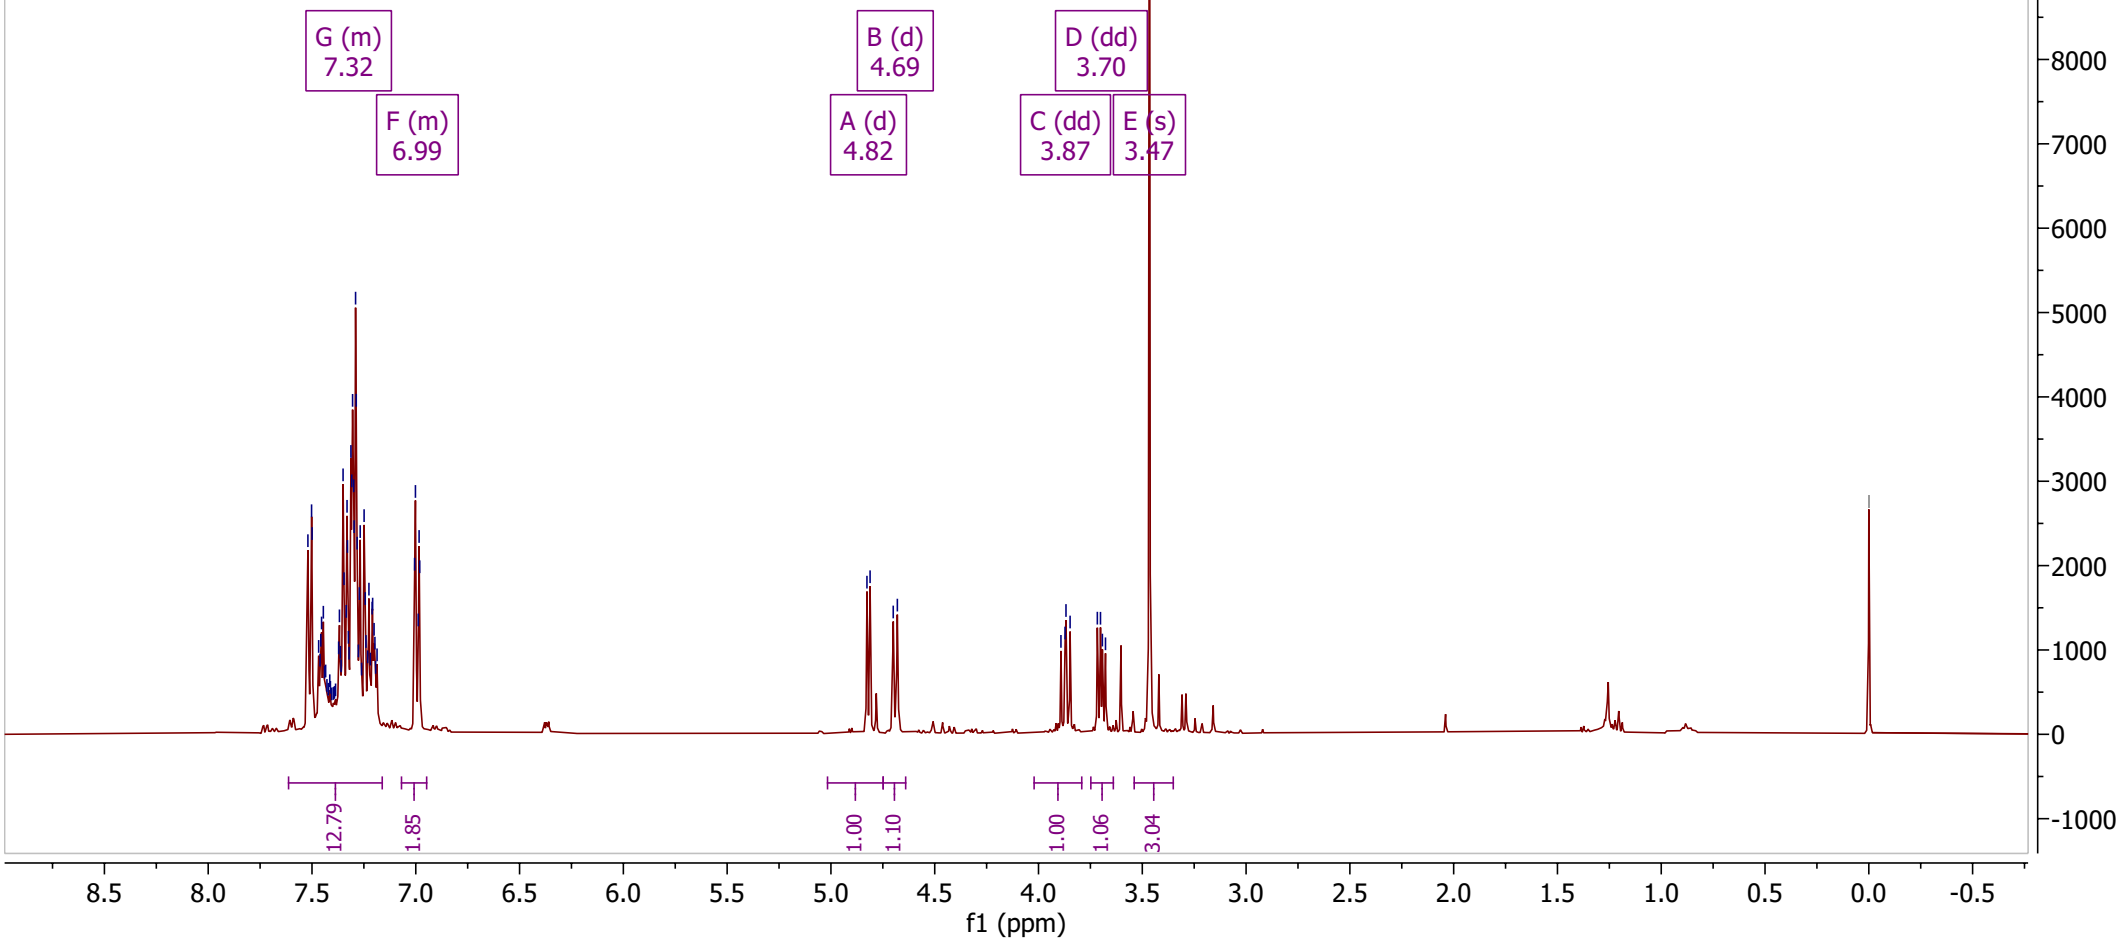

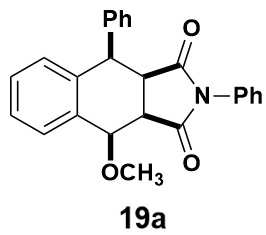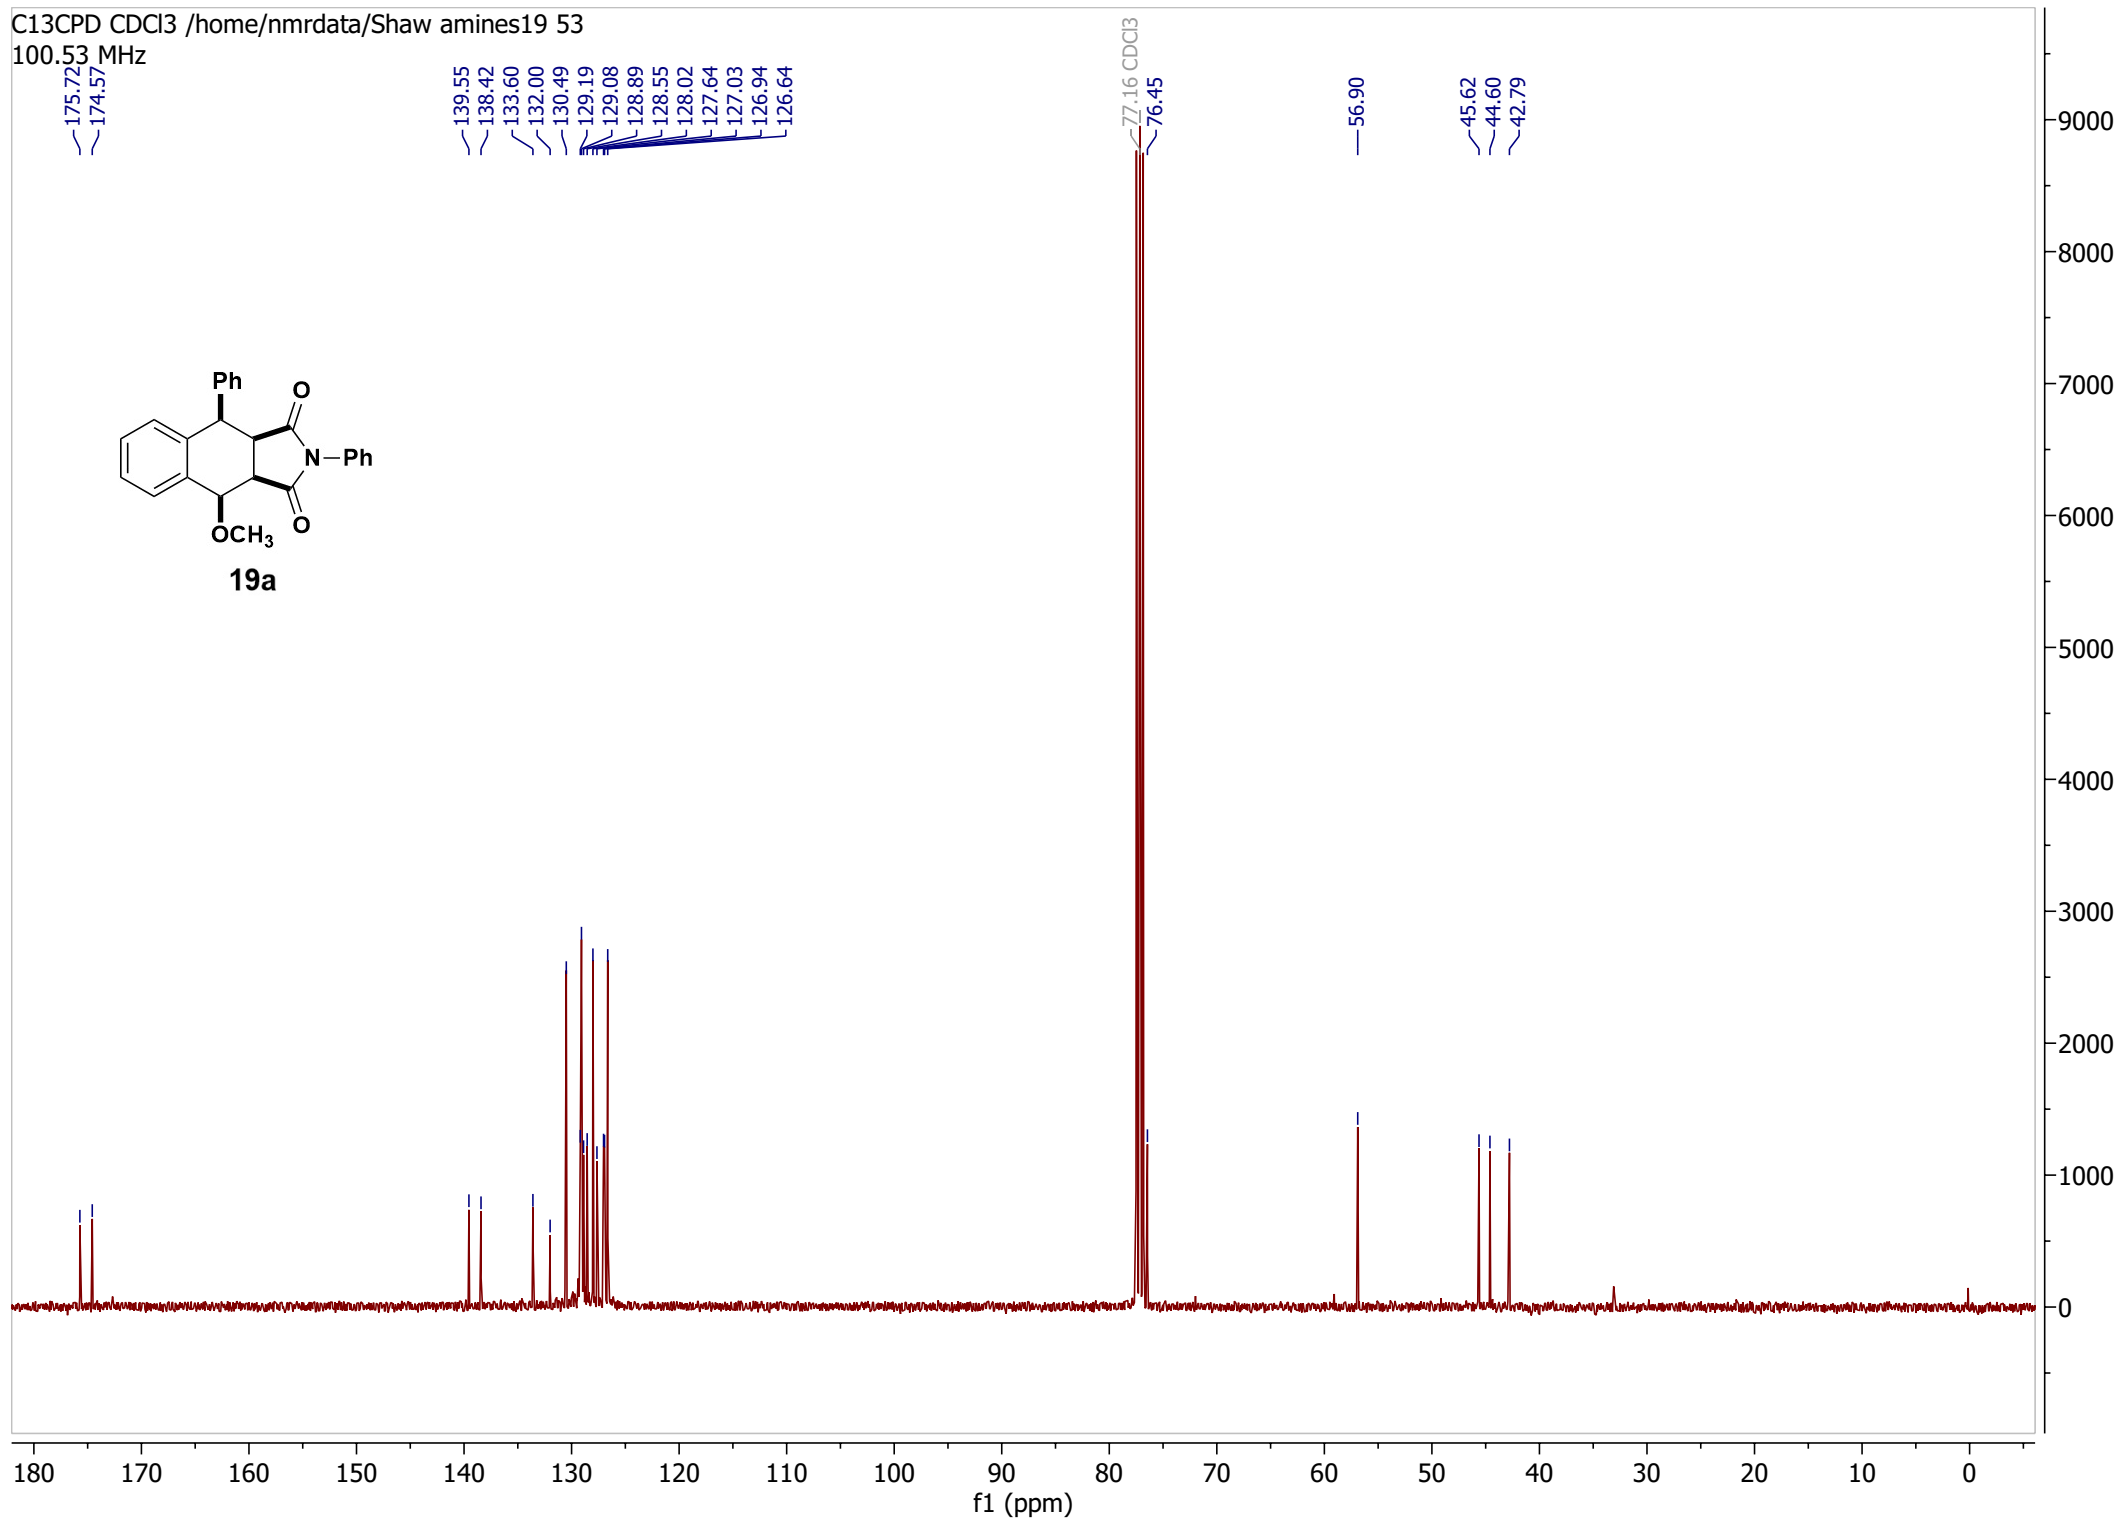

PROTON CDCl3 {D:\nmrdata\Shaw} amines19 51  
399.77 MHz

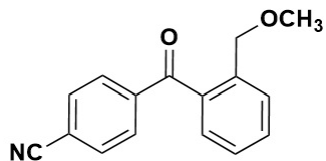

7.88  
7.86  
7.77  
7.75  
7.55  
7.54  
7.53  
7.52  
7.52  
7.51  
7.50  
7.40  
7.39  
7.38  
7.37  
7.36  
7.34  
7.32

4.52

3.21

— 0.00 TMS

D (d)  
7.76

C (d)  
7.87

F (m)  
7.37

E (dd)  
7.53

A (s)  
4.52

B (s)  
3.21

2.02  
2.02  
2.08  
1.98

2.00

2.86

10.0 9.5 9.0 8.5 8.0 7.5 7.0 6.5 6.0 5.5 5.0 4.5 4.0 3.5 3.0 2.5 2.0 1.5 1.0 0.5 0.0 -0.5  
f1 (ppm)

19000  
18000  
17000  
16000  
15000  
14000  
13000  
12000  
11000  
10000  
9000  
8000  
7000  
6000  
5000  
4000  
3000  
2000  
1000  
0  
-1000

C13CPD CDCl3 {D:\nmrdata\Shaw} amines19 51  
100.53 MHz

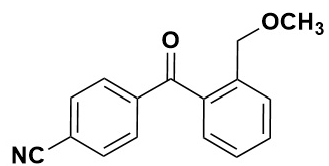

141.14  
138.46  
136.61  
132.33  
131.23  
130.24  
128.99  
128.72  
127.42

118.14  
116.17

77.16 CDCl3

72.32

58.53

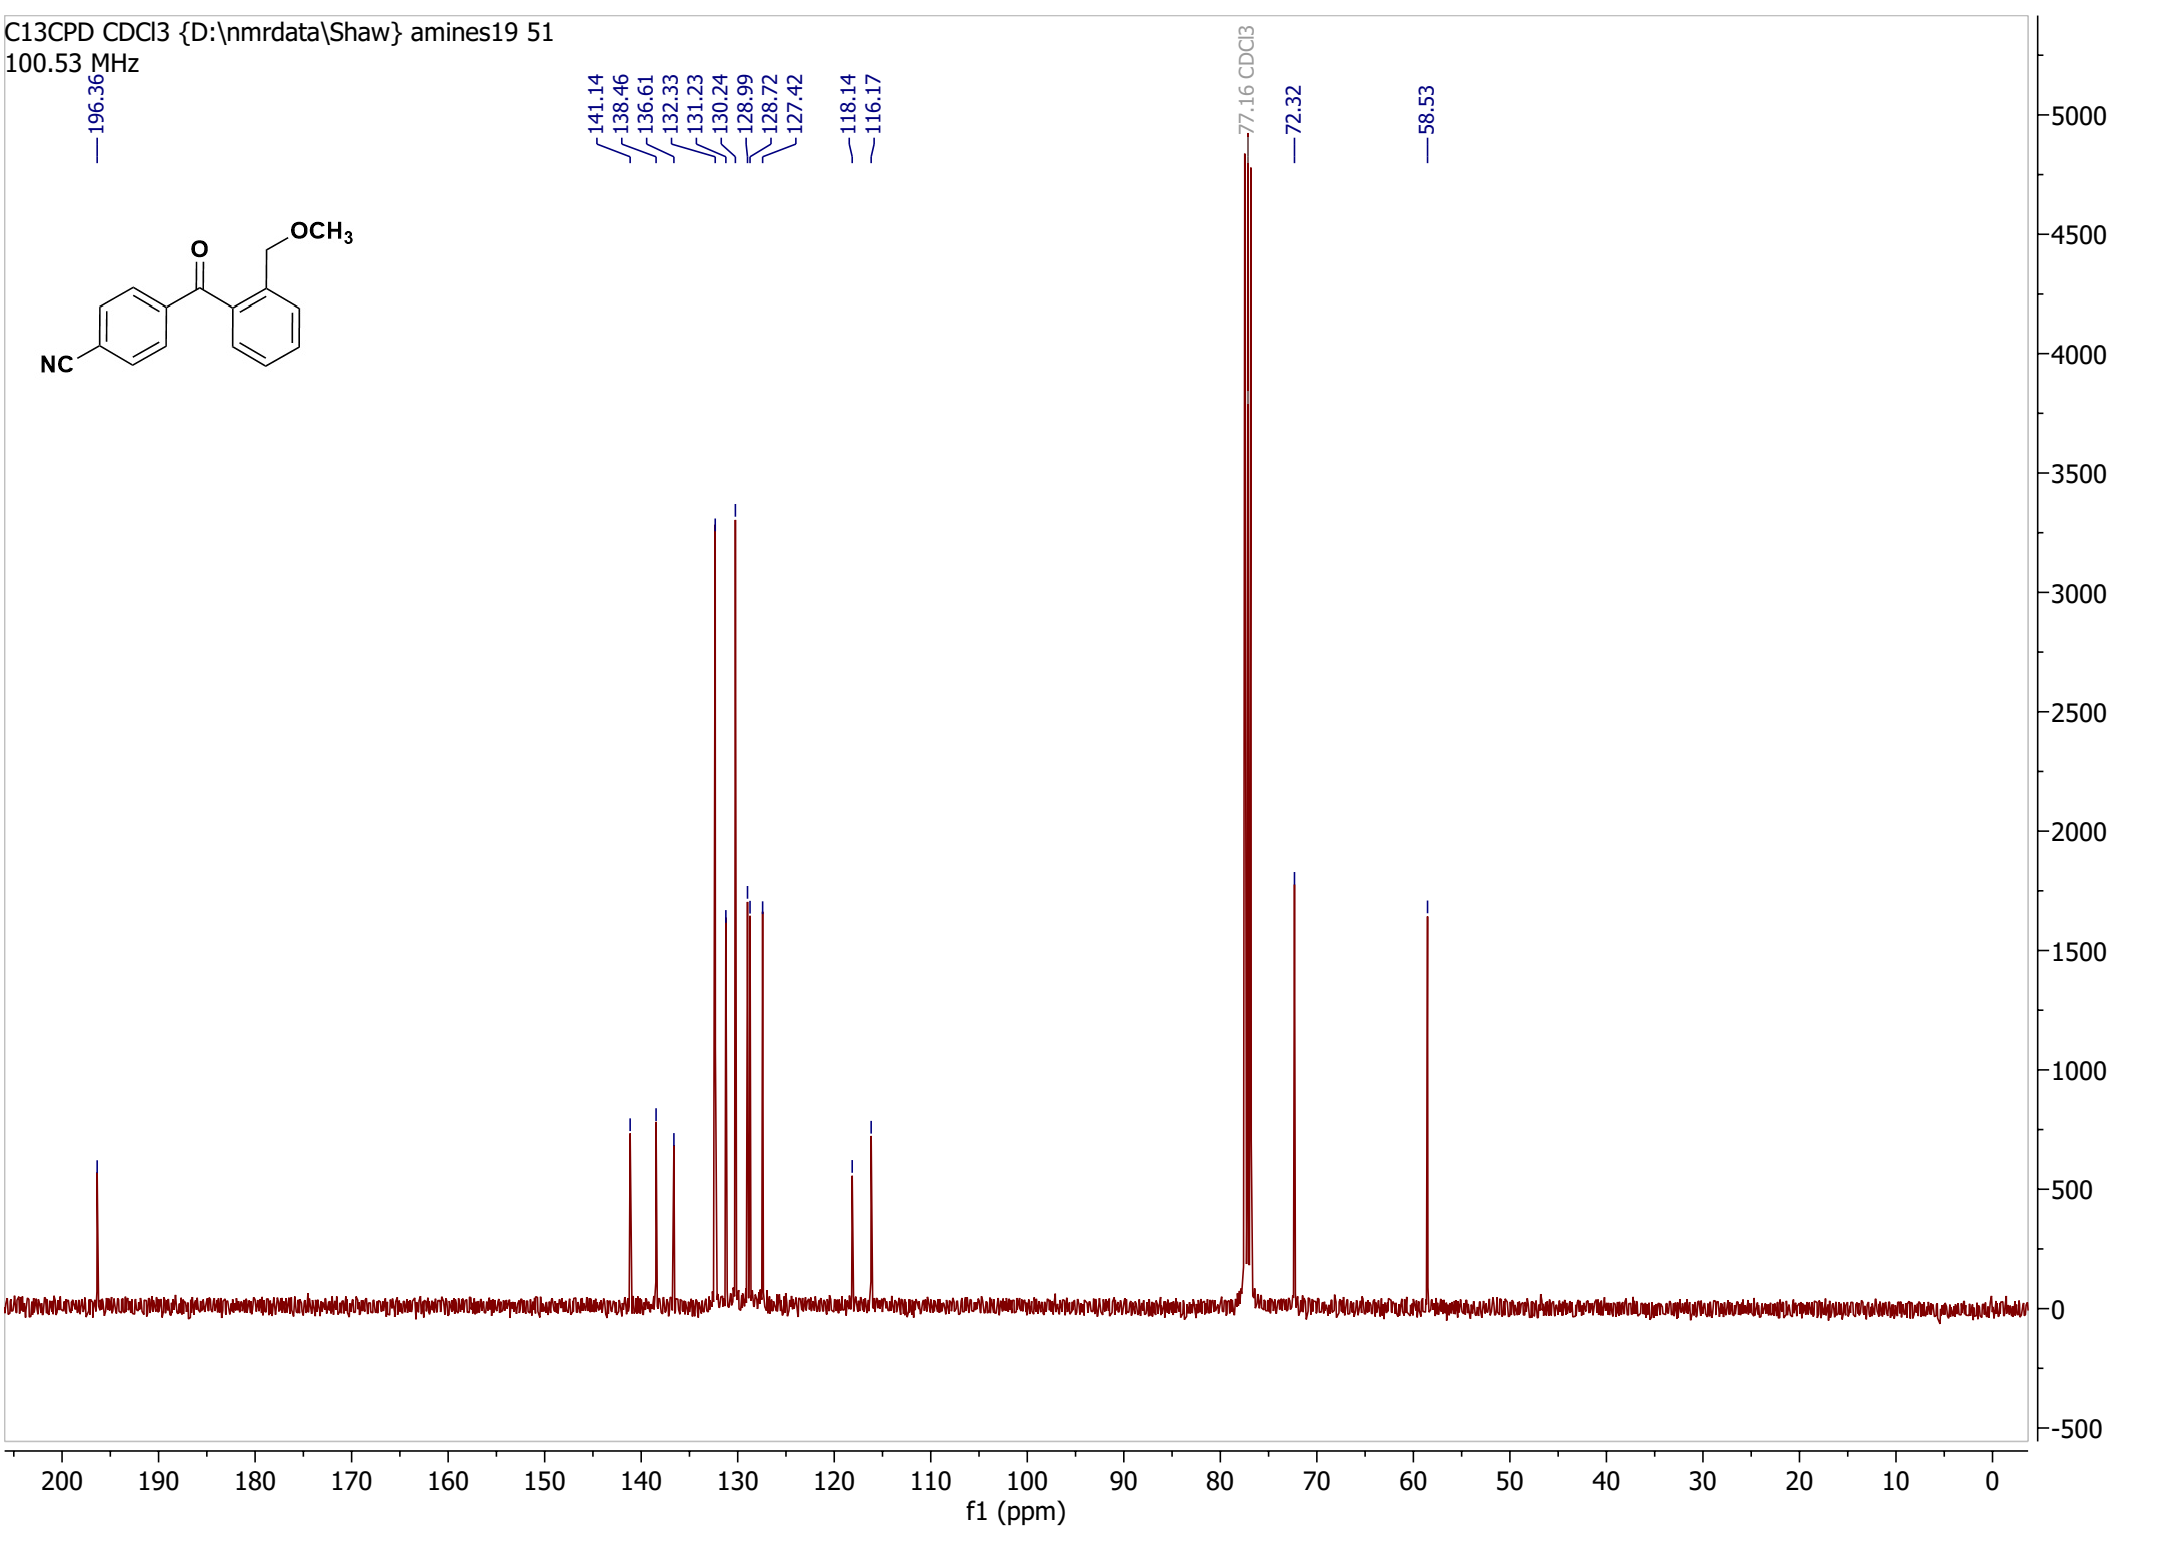



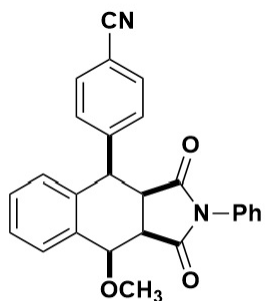

**19b**

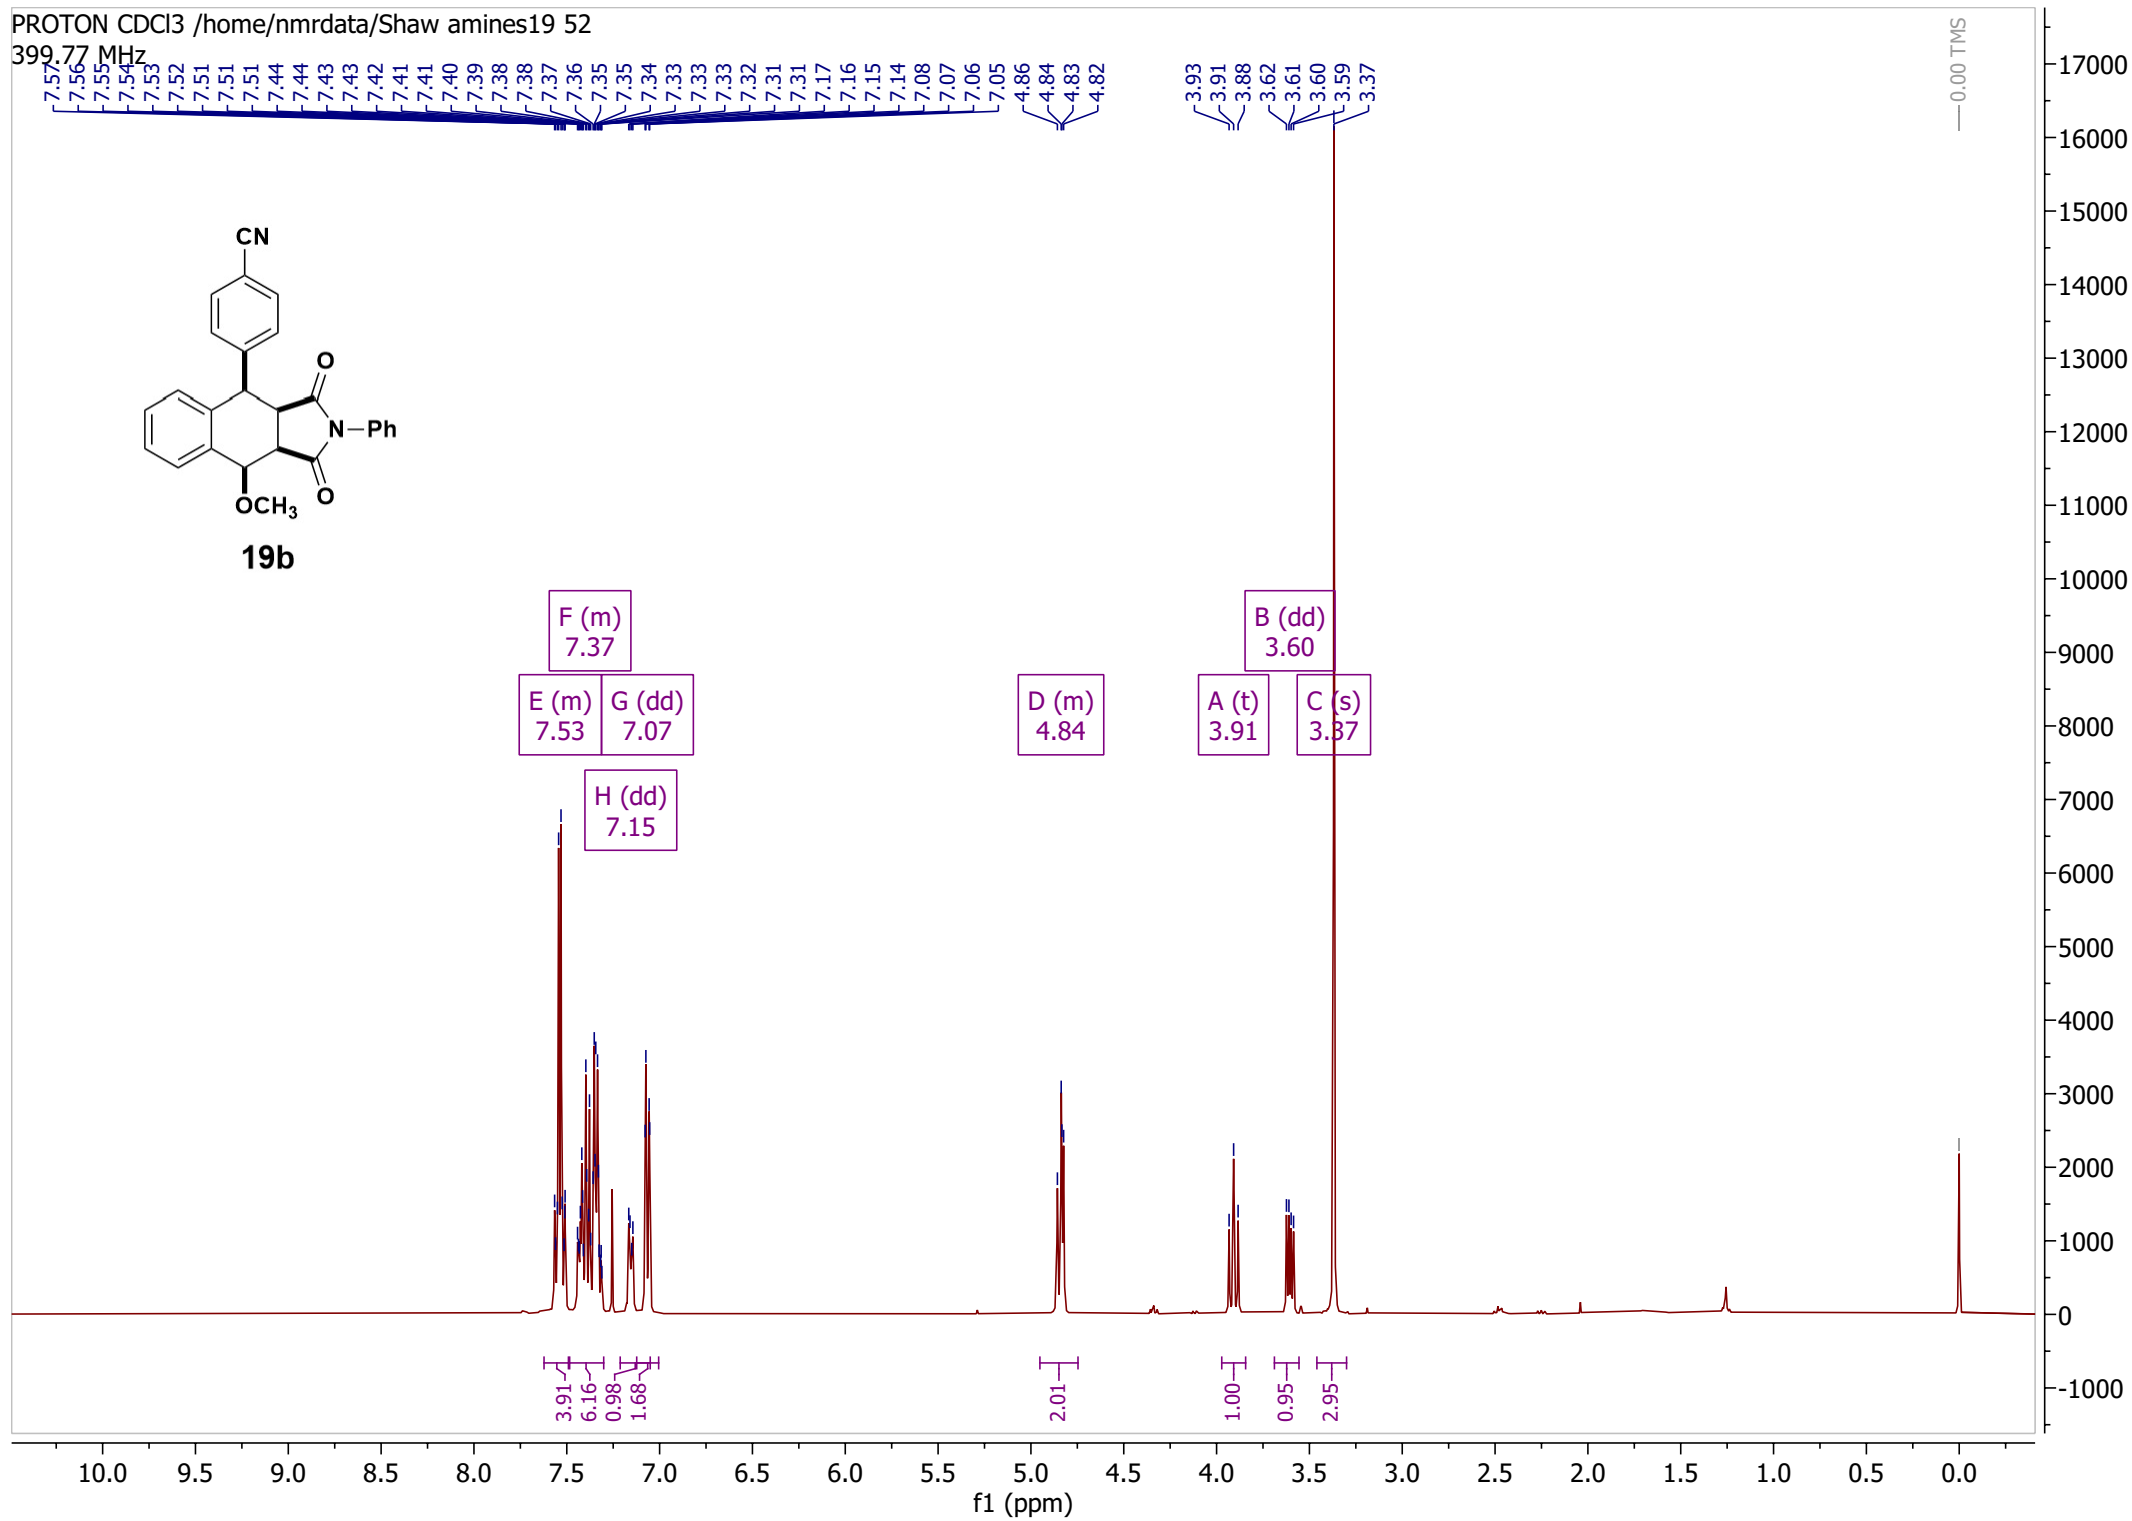

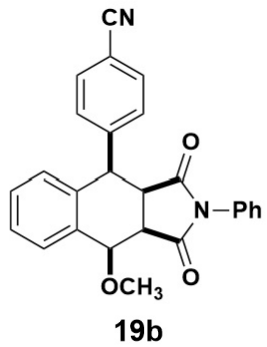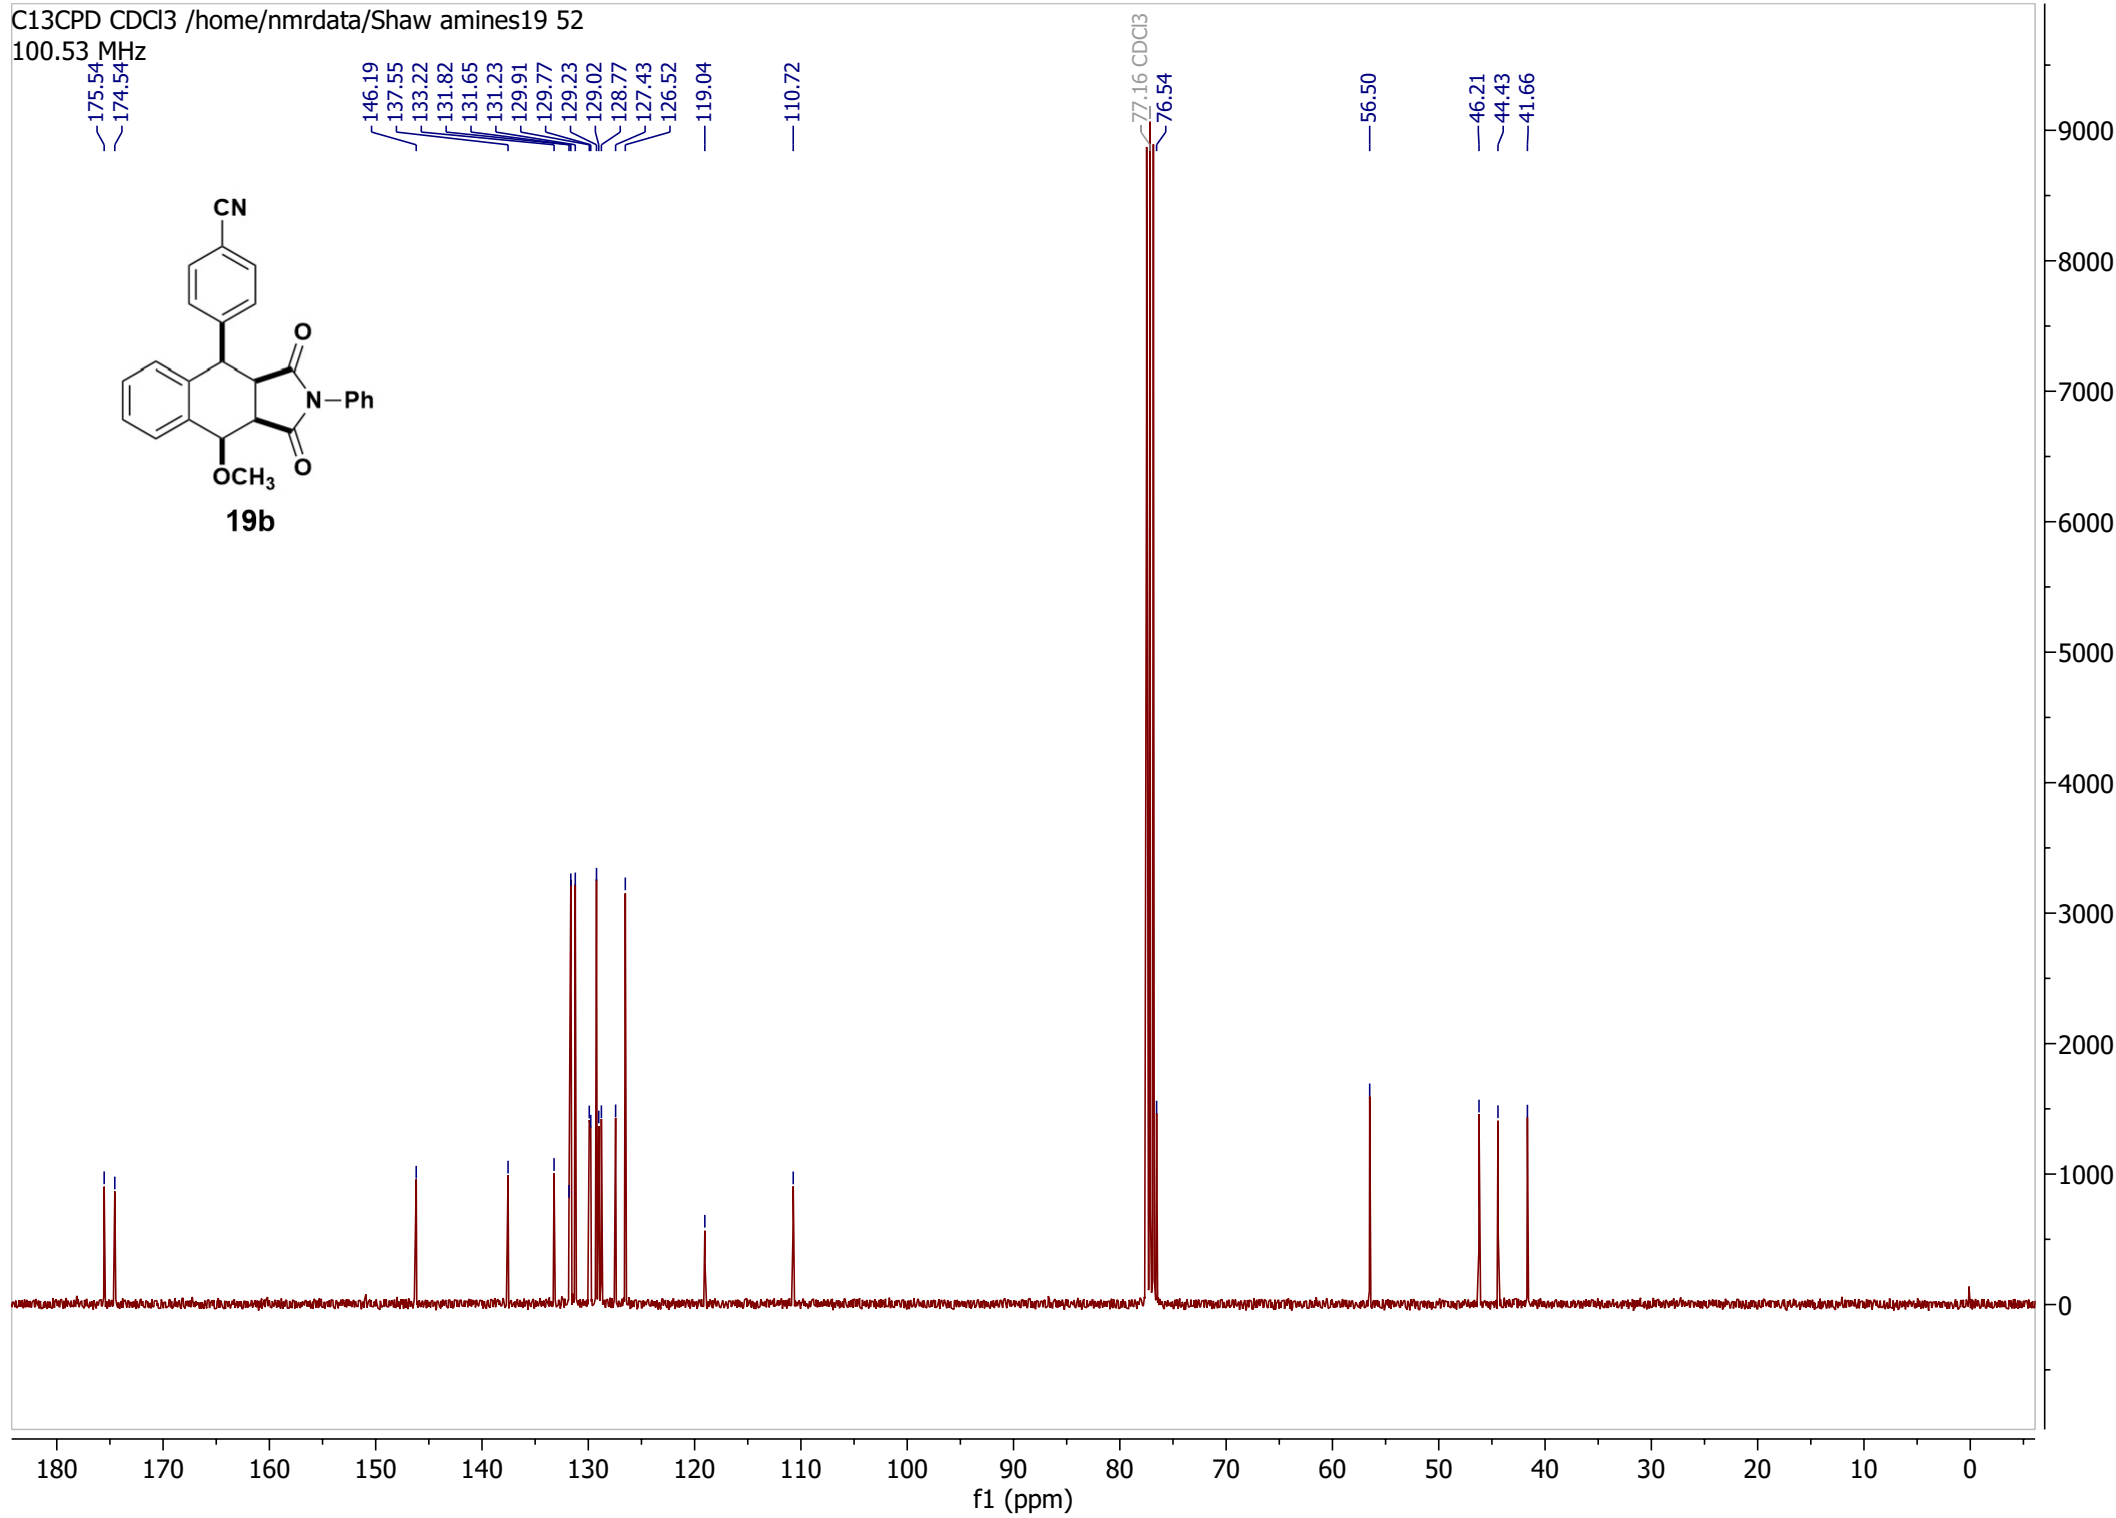

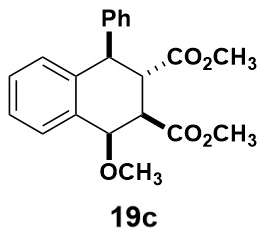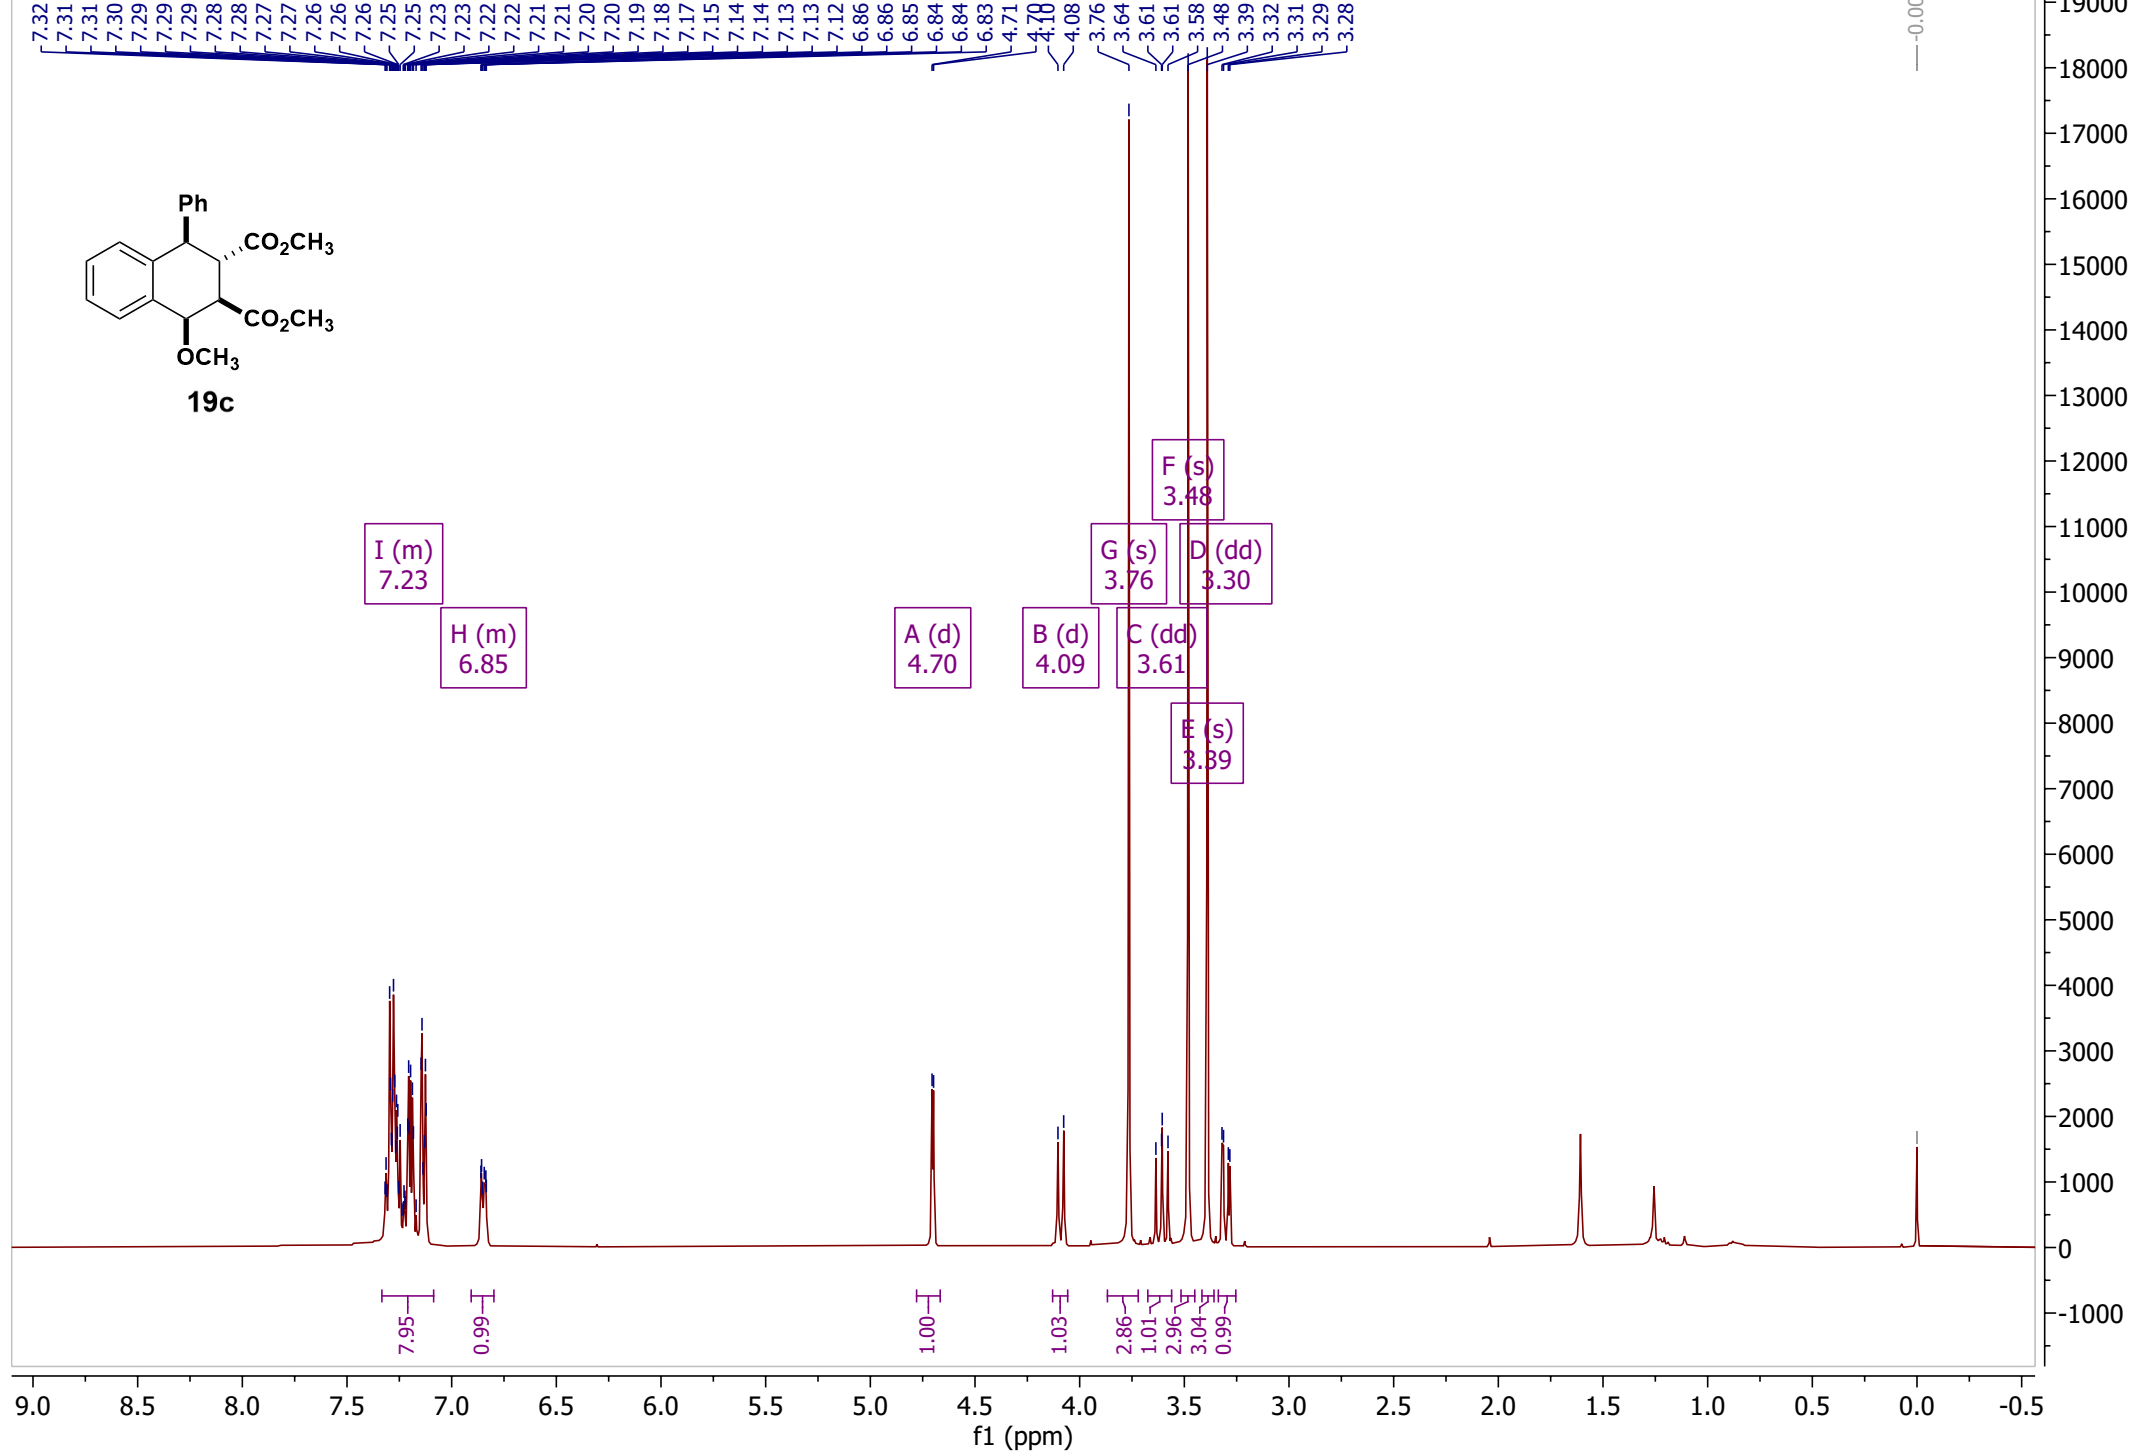

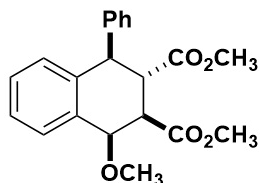

19c

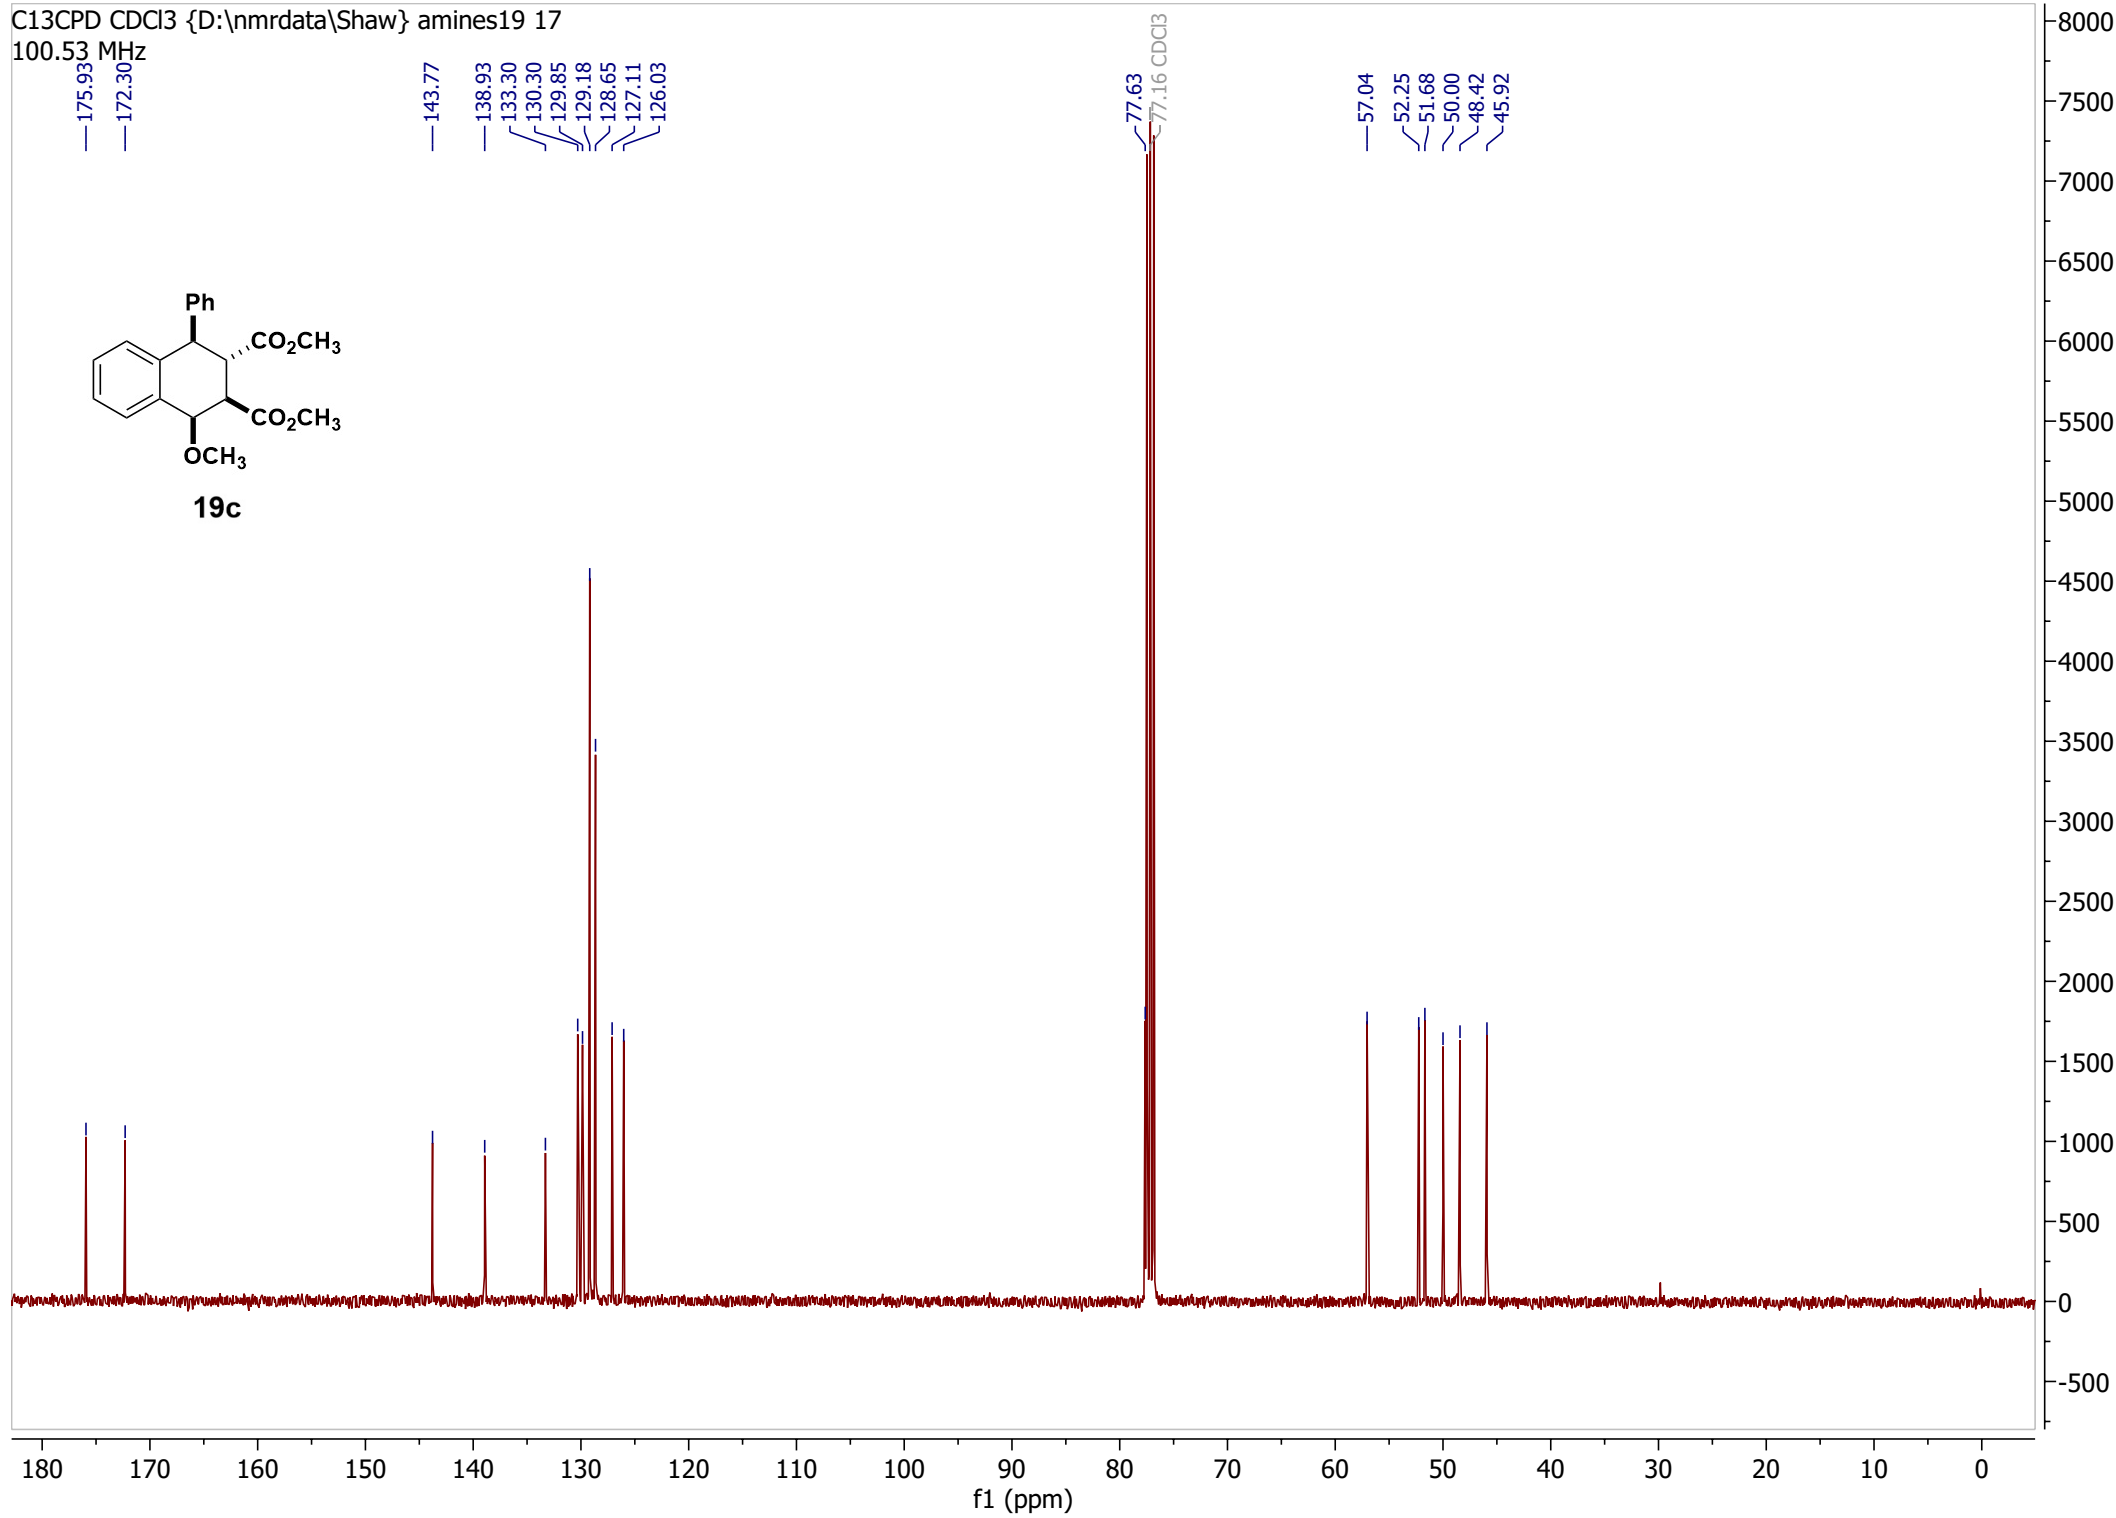

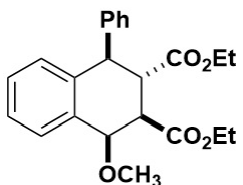

19d

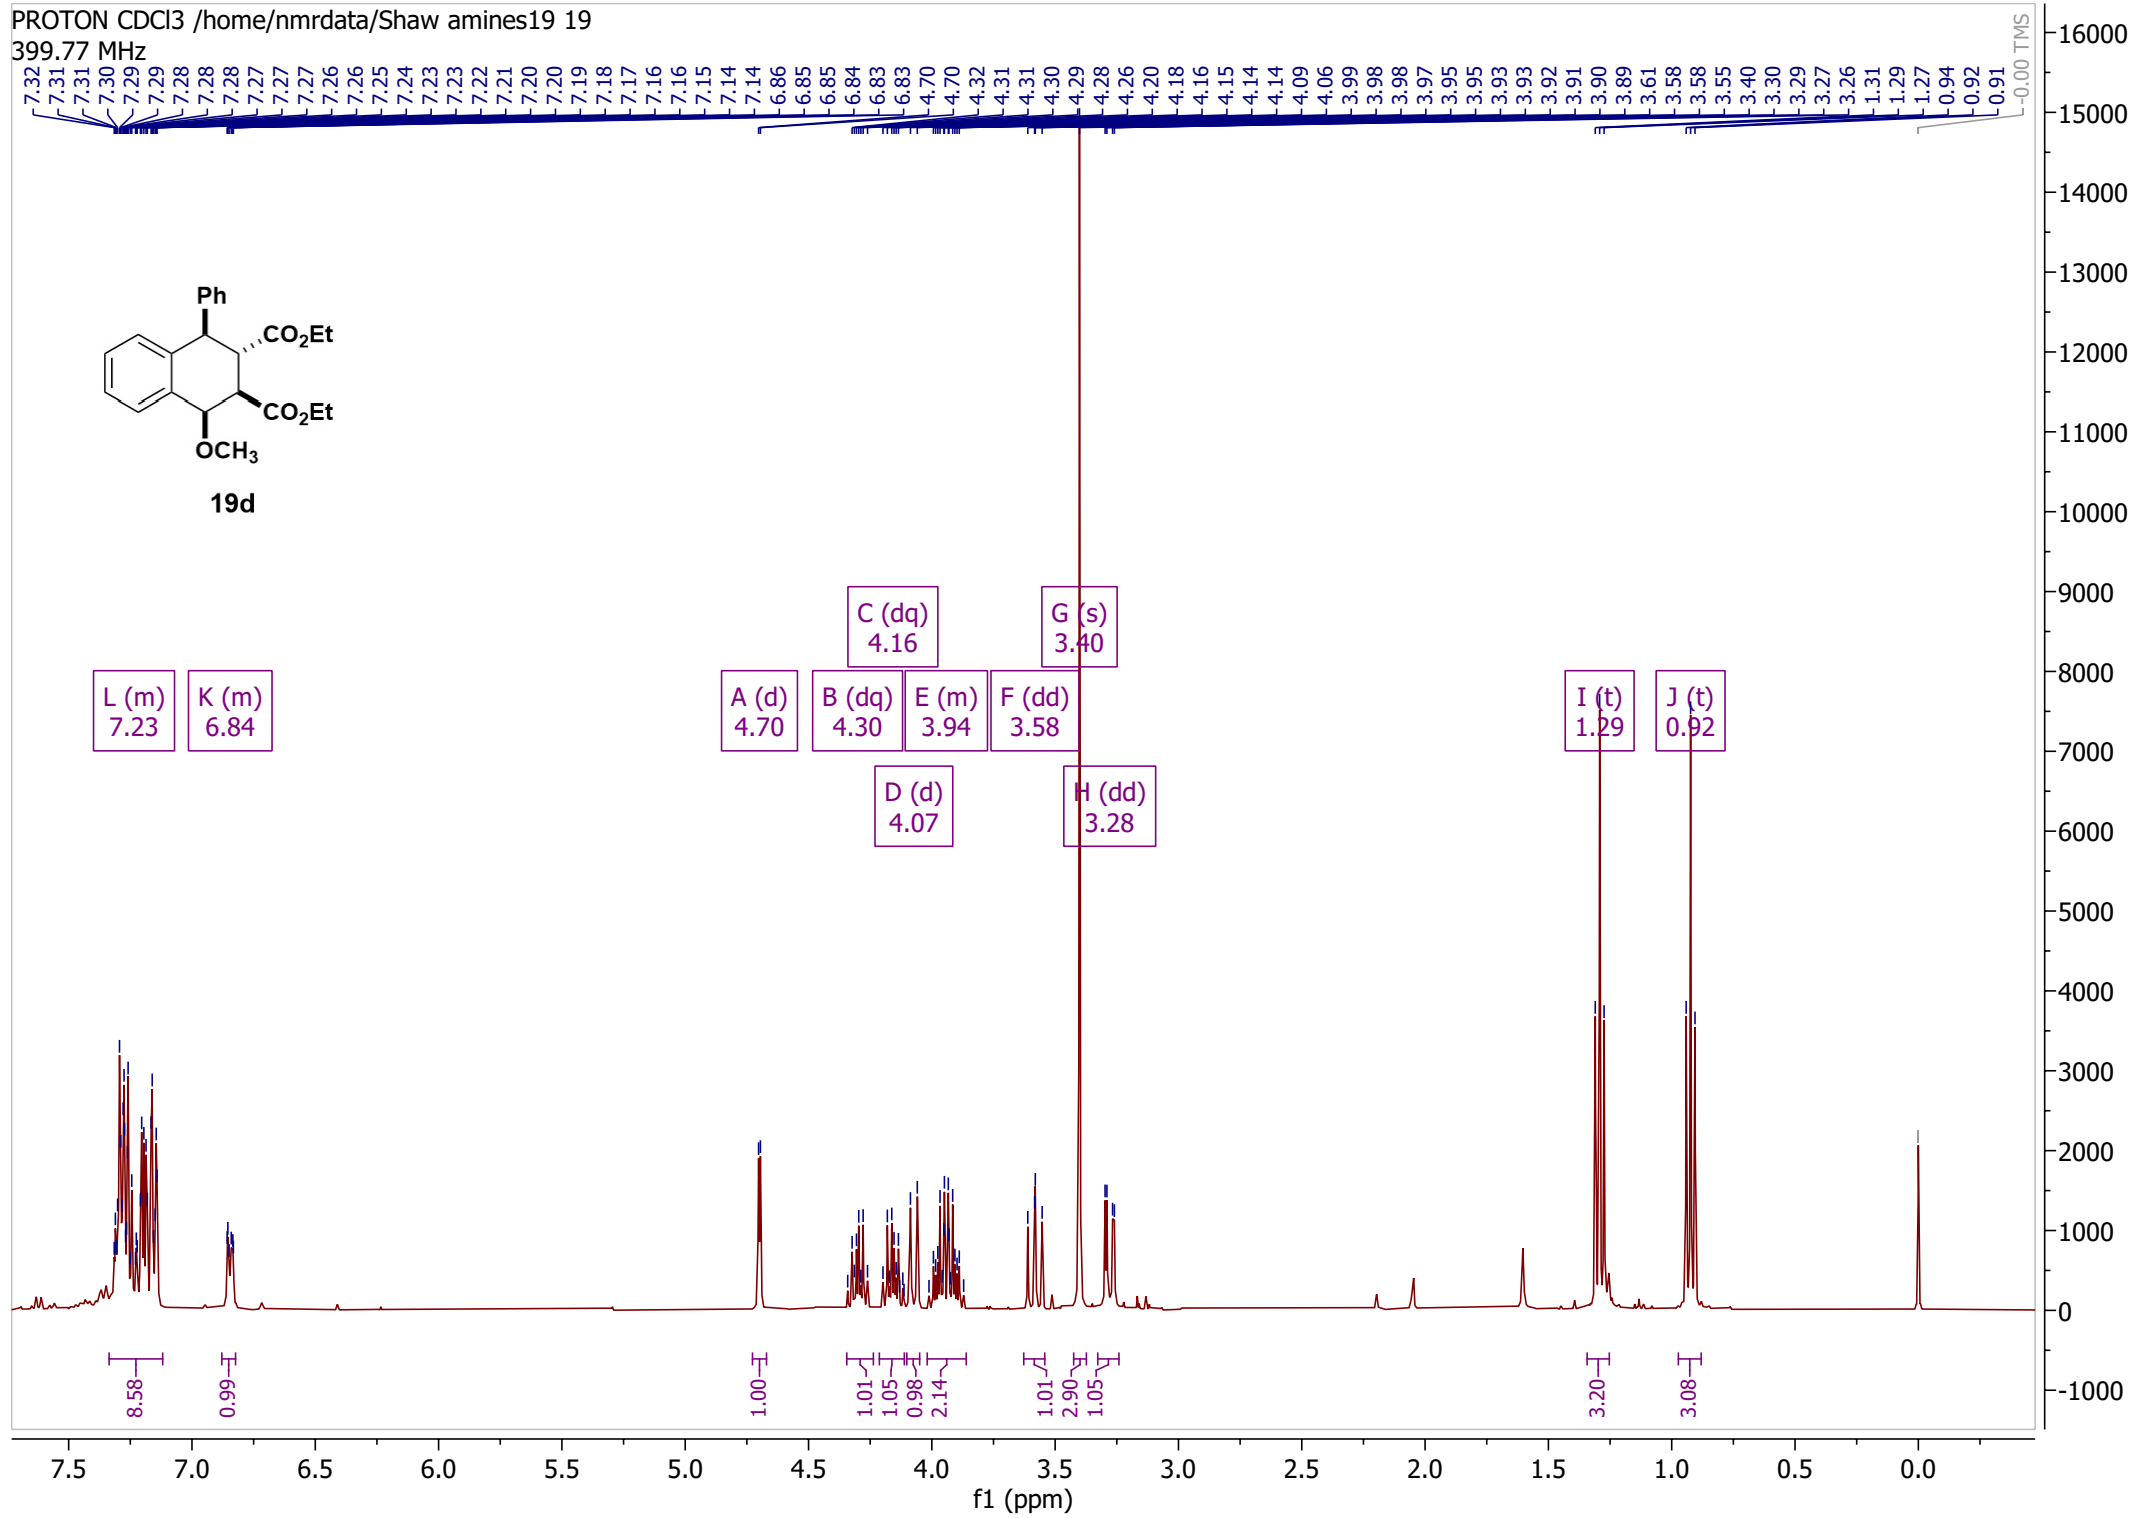

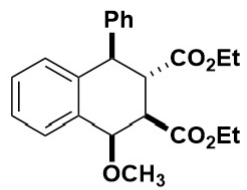**19d**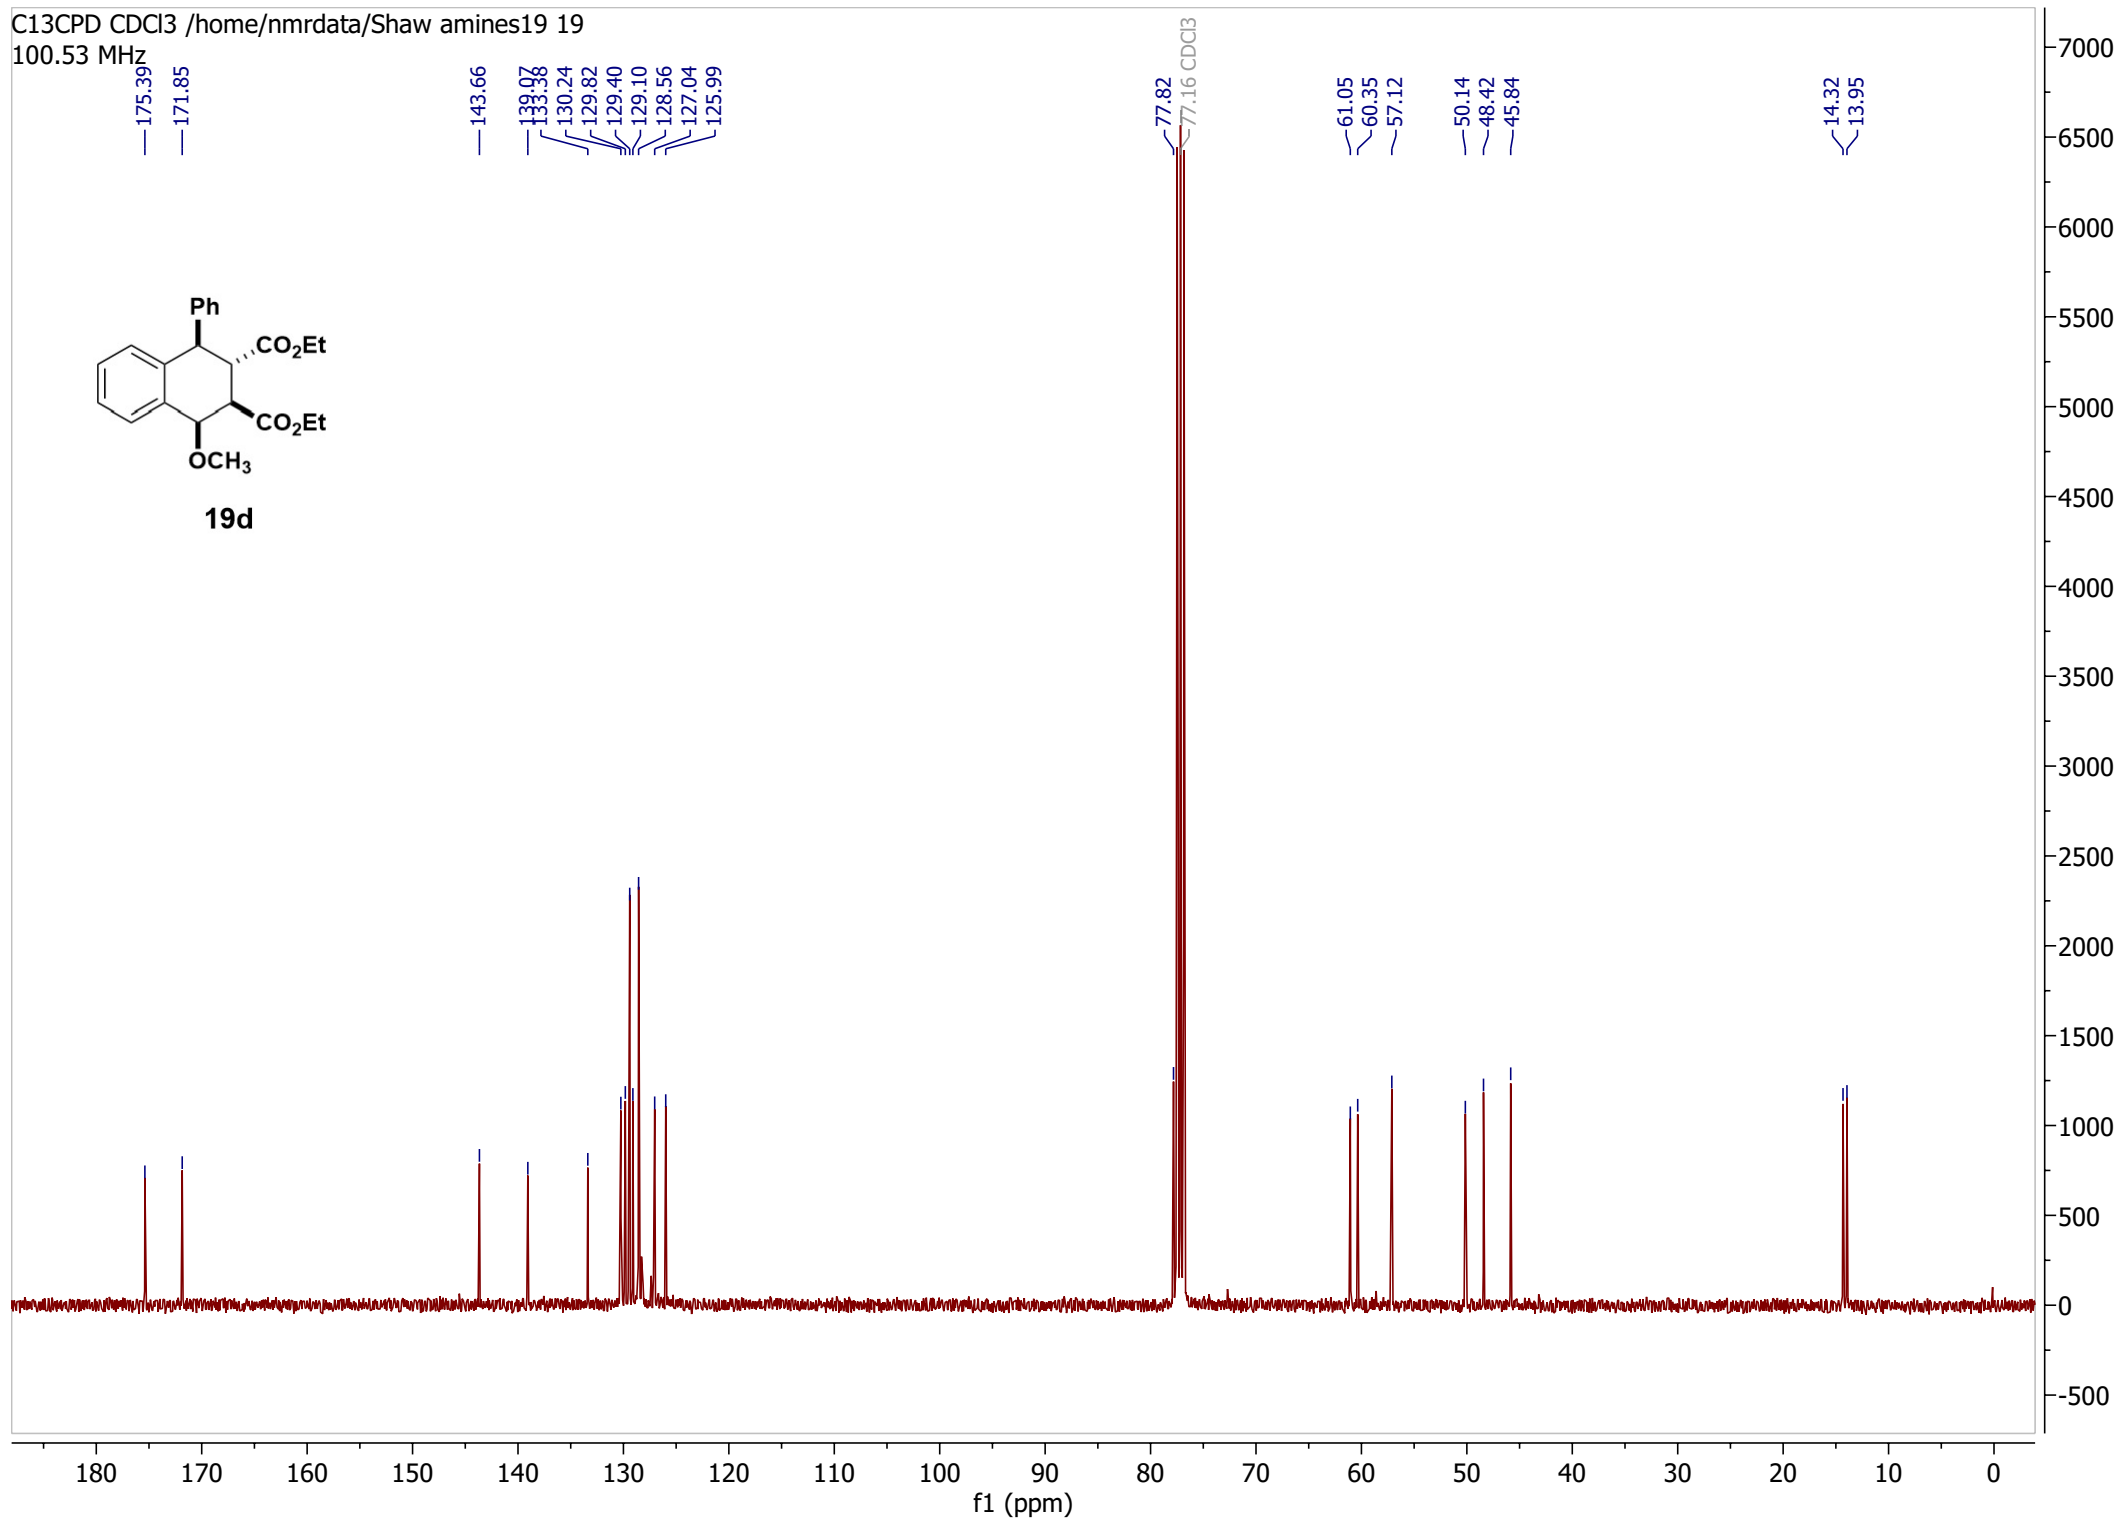

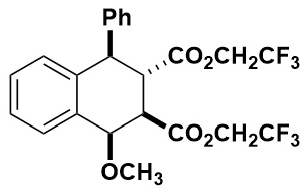

**19e**

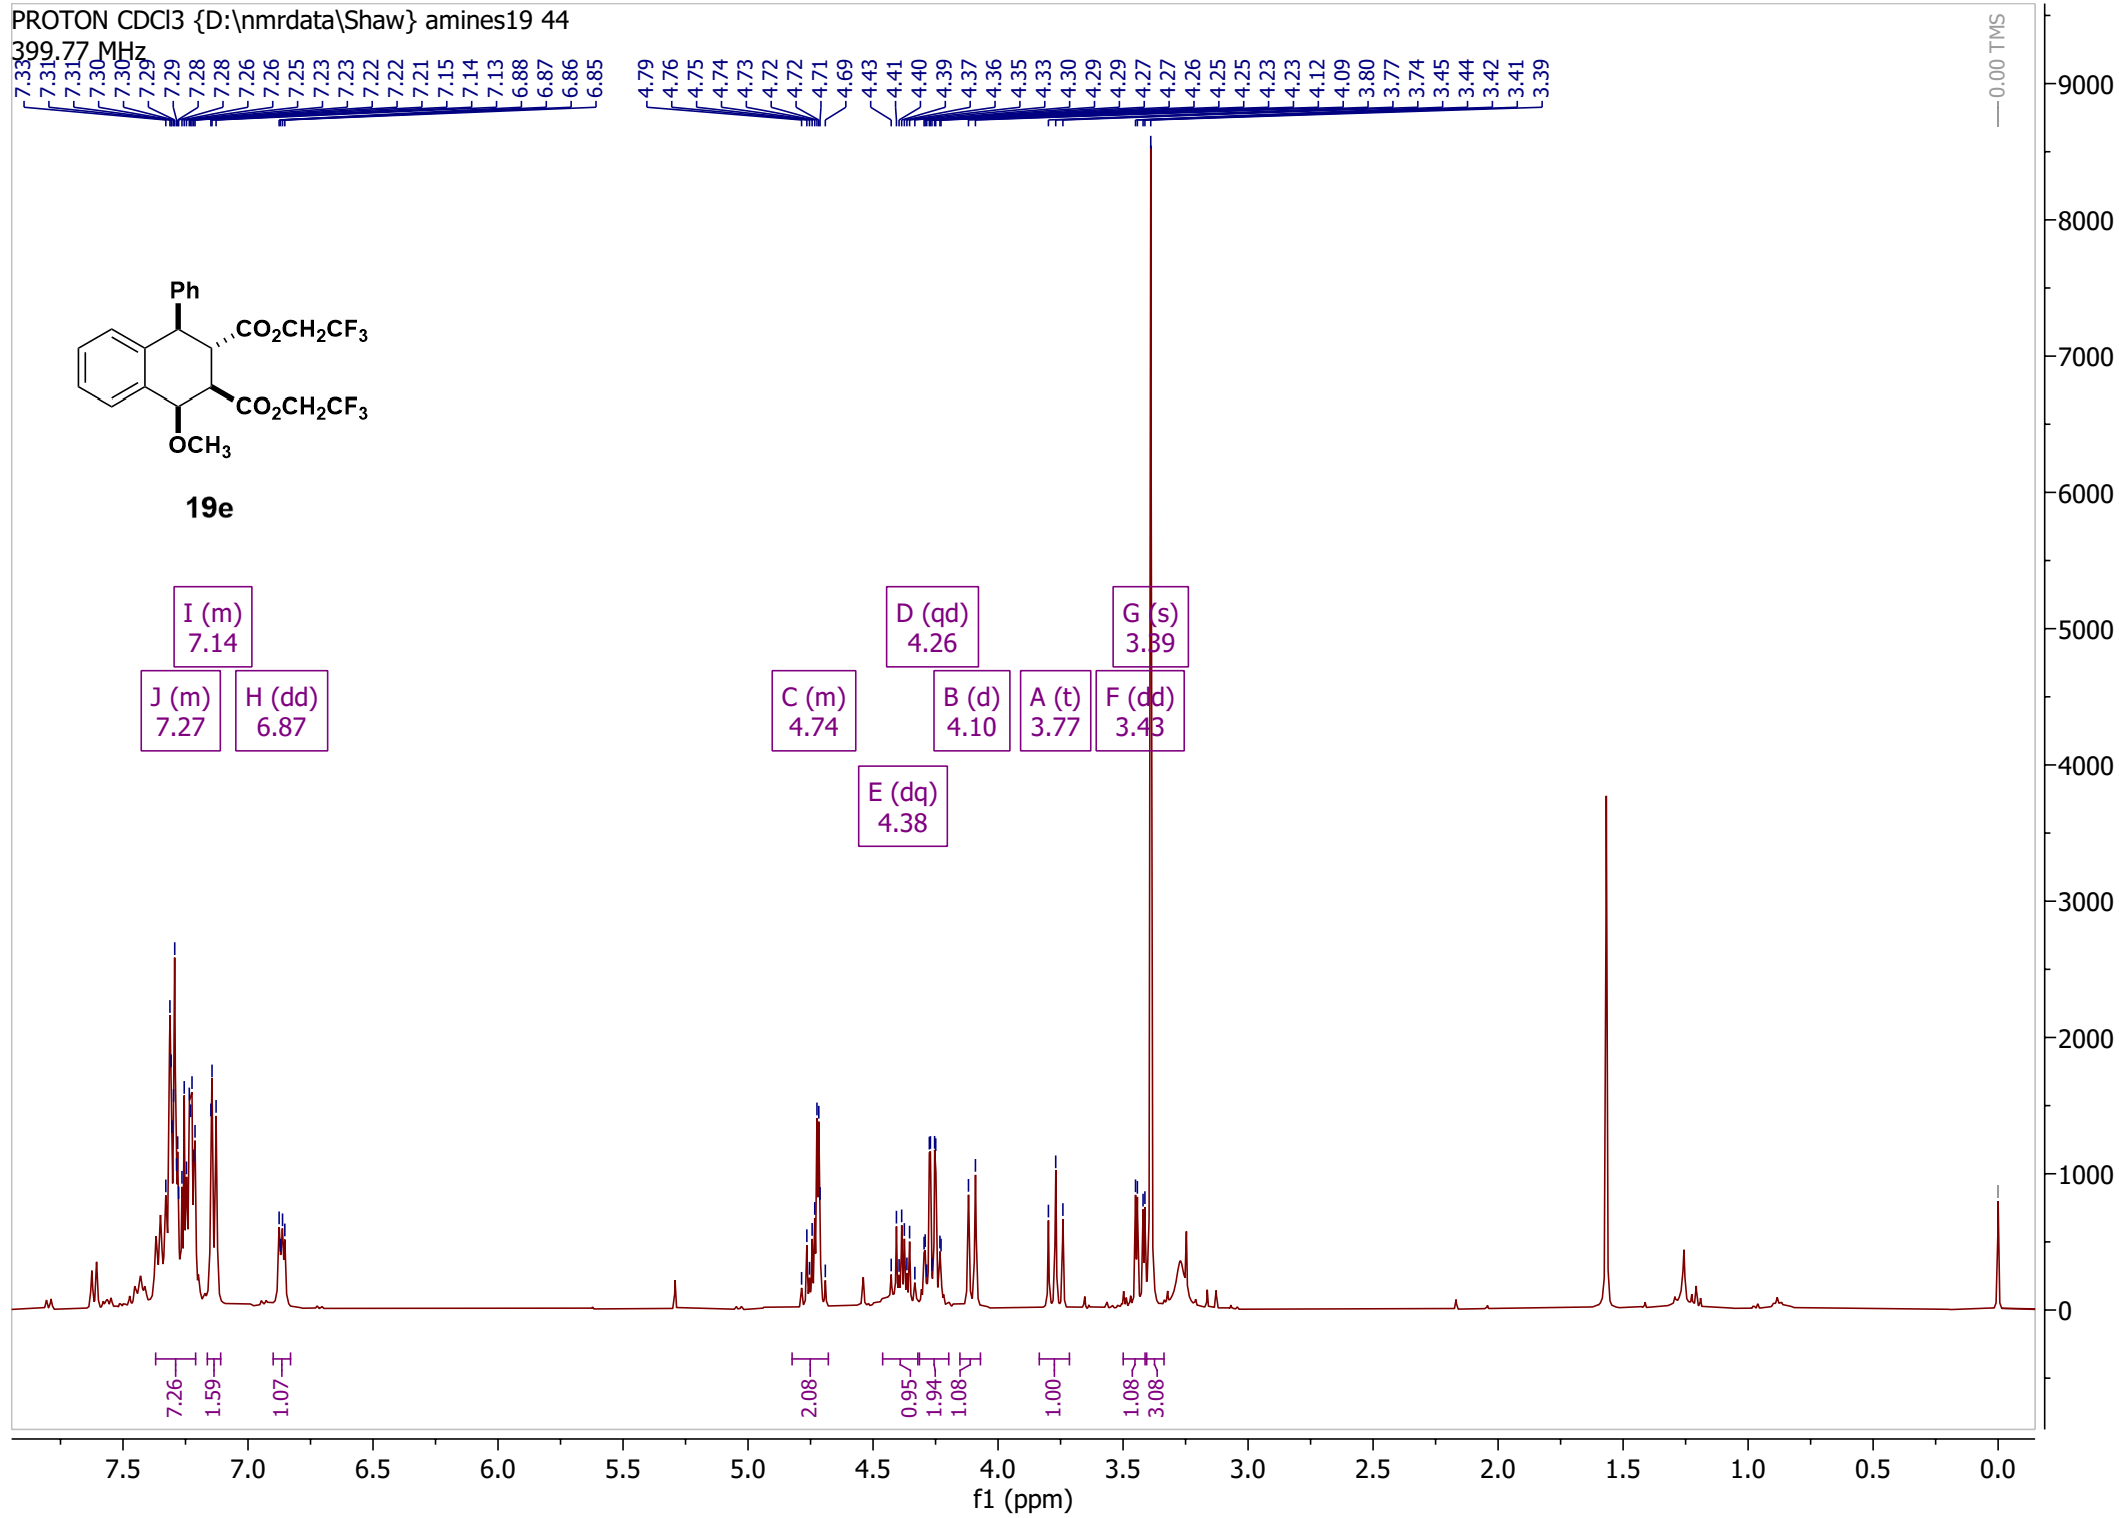

F19 CDCl3 {D:\nmrdata\Shaw} amines19 44  
376.12 MHz

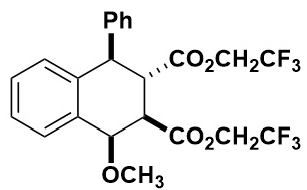

19e

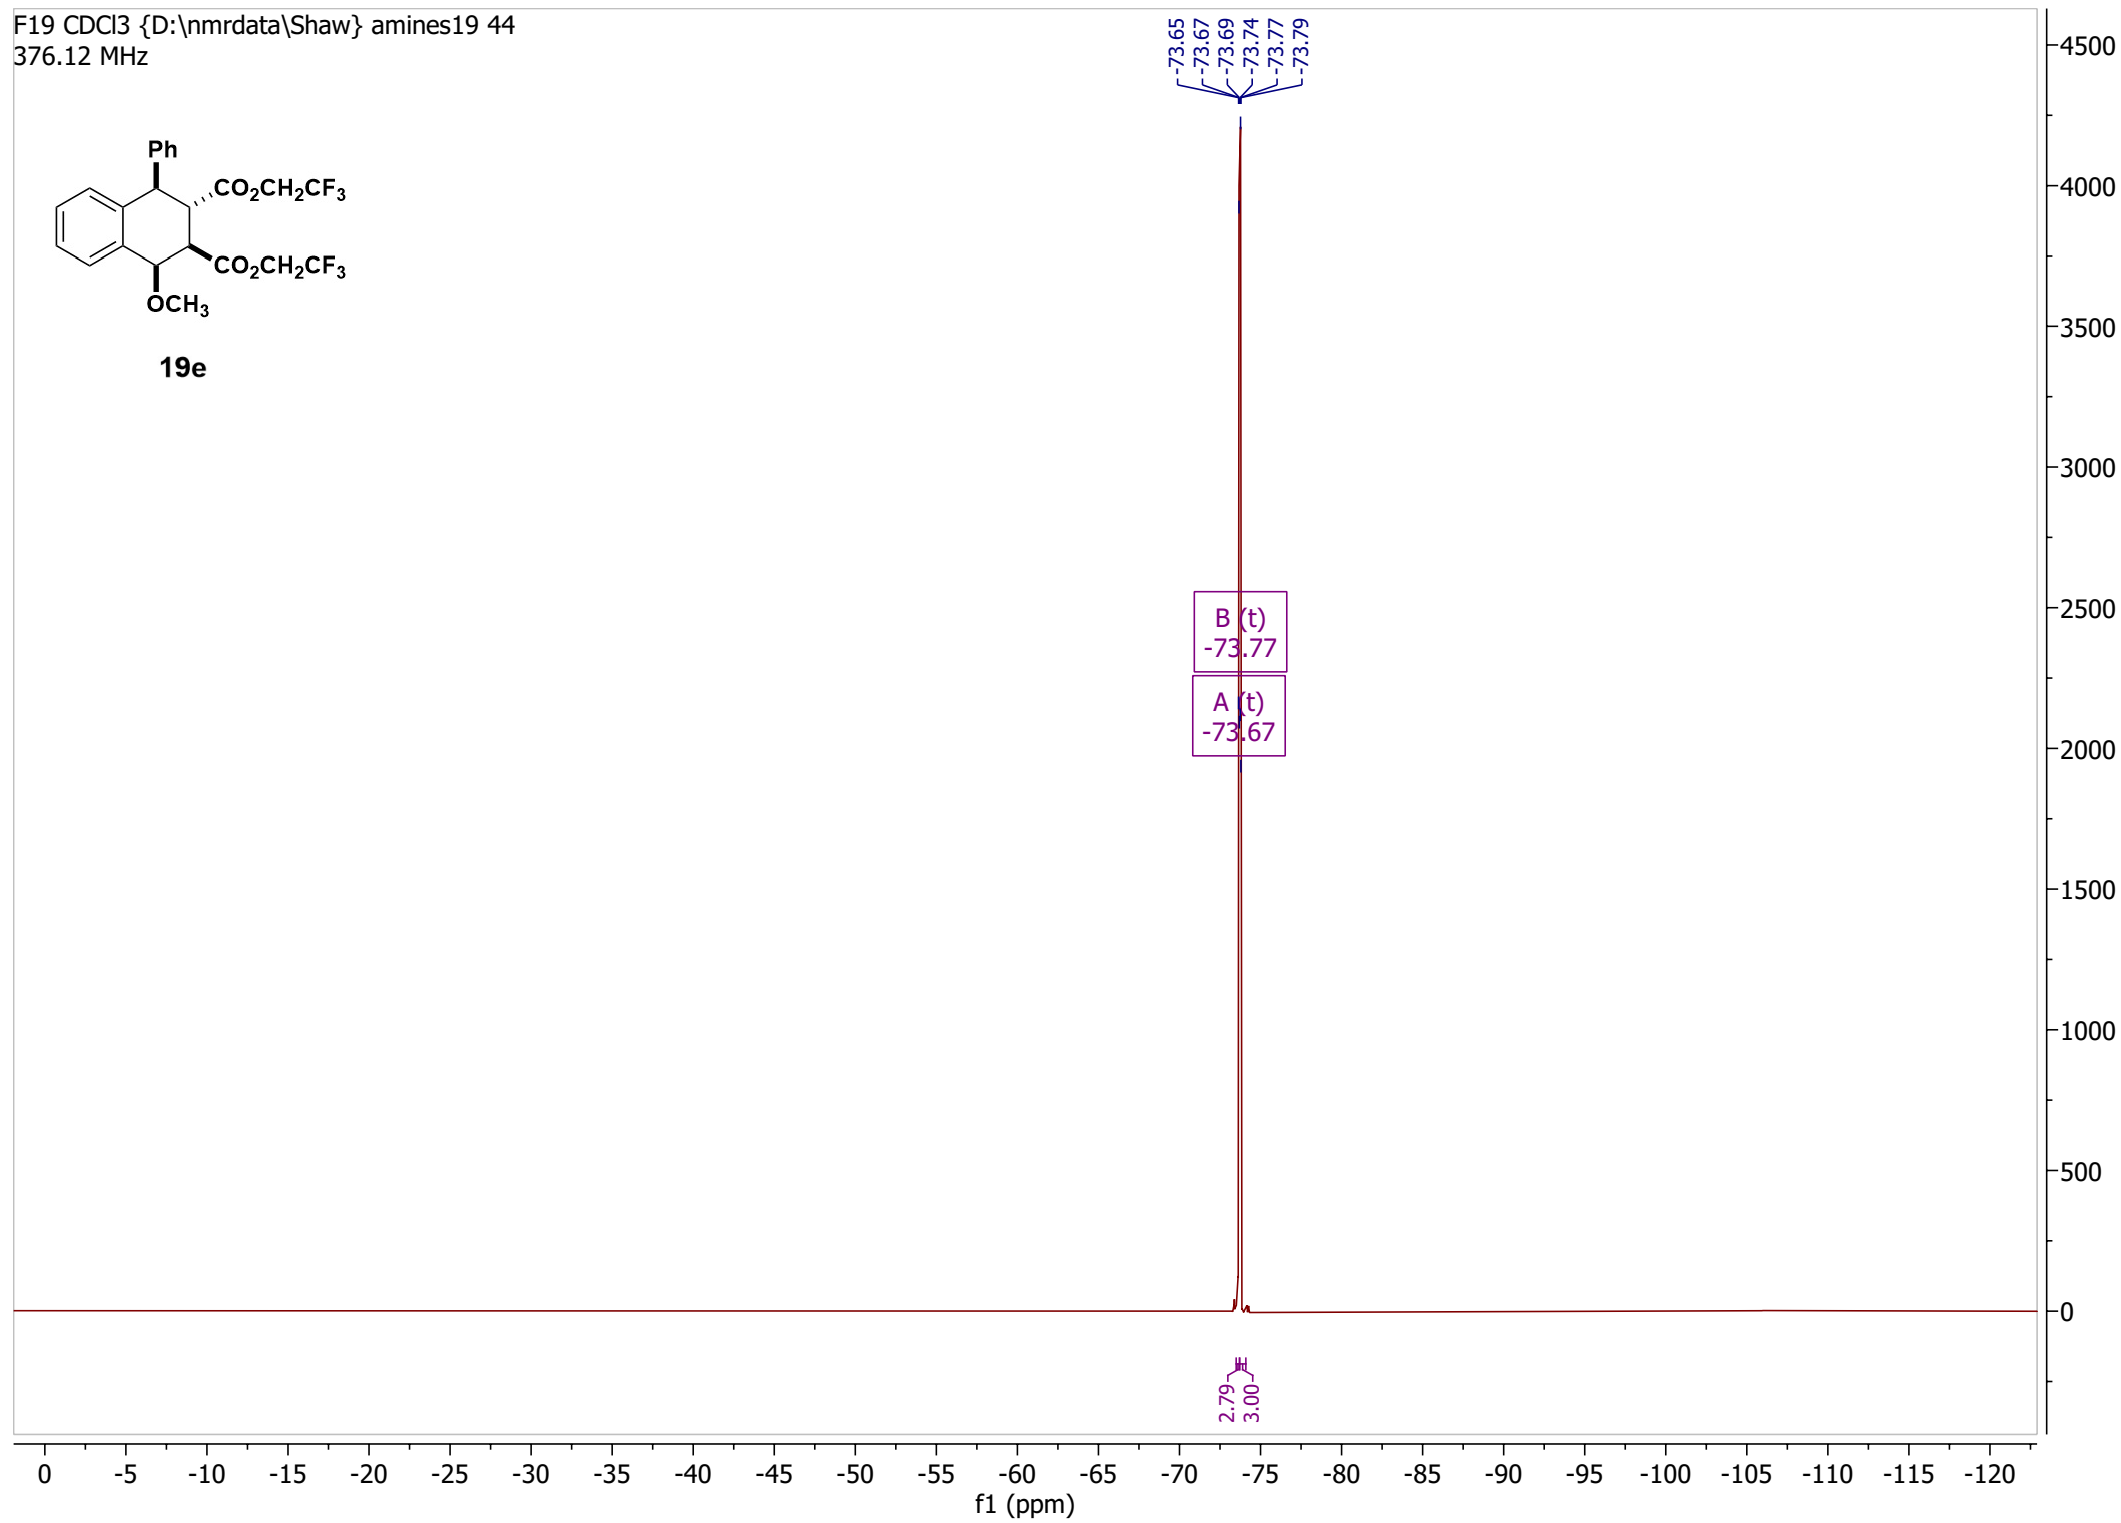



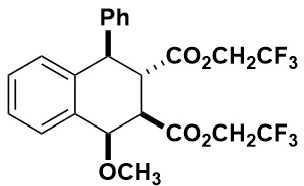

**19e**

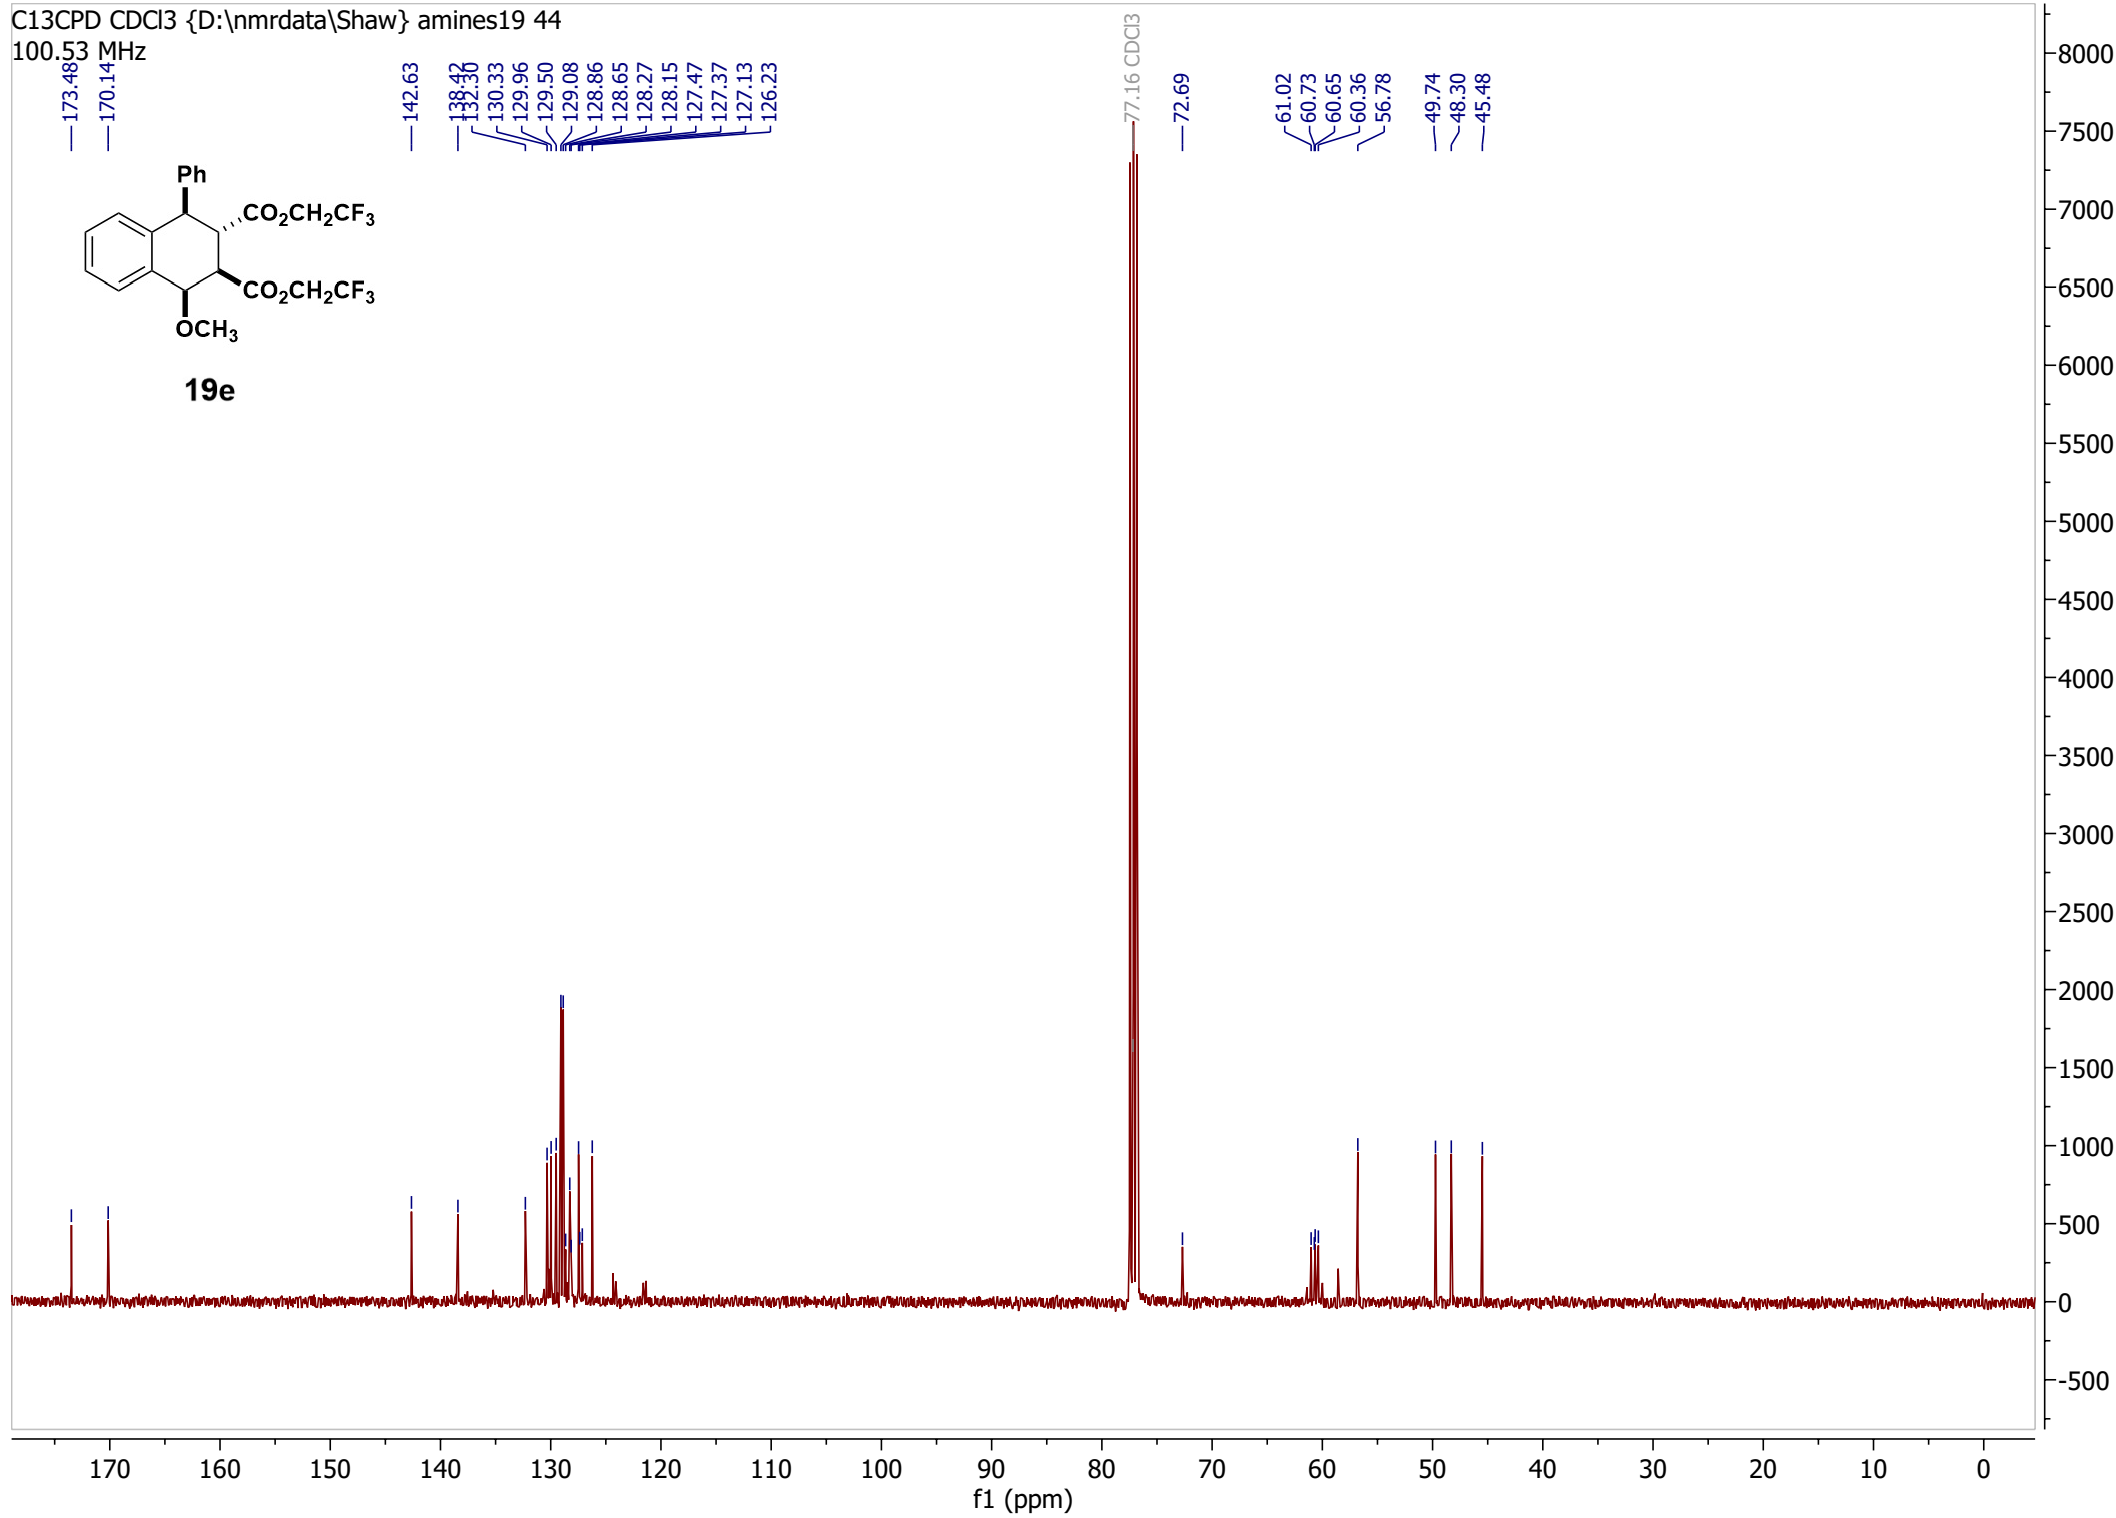

7.48 7.46 7.31 7.31 7.30 7.29 7.29 7.28 7.28 7.27 7.27 7.26 7.26 7.25 7.25 7.24 7.24 7.23 7.22 7.17 7.16 7.16 7.15 7.14 7.14 7.14 7.12 7.12 6.87 6.86 6.85

4.80 4.77 4.76

3.73 3.71 3.69 3.68 3.55 3.54 3.52 3.51 3.50 3.41 3.37 2.93 2.88 2.63 2.61 2.58 2.57

— 0.00 TMS

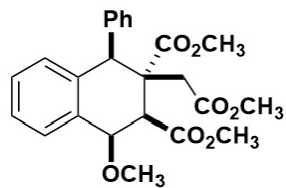

**19f**

**J (m)** 7.27  
**I (m)** 7.47  
**C (m)** 6.86  
**K (ddd)** 7.15  
**E (d)** 4.77  
**D (s)** 4.80  
**G (s)** 3.73  
**H (d)** 3.70  
**F (s)** 3.52  
**B (d)** 2.91  
**A (d)** 2.59

0.98  
4.57  
3.01  
1.08

0.99  
1.02

2.98  
3.99  
3.26

1.00

1.00

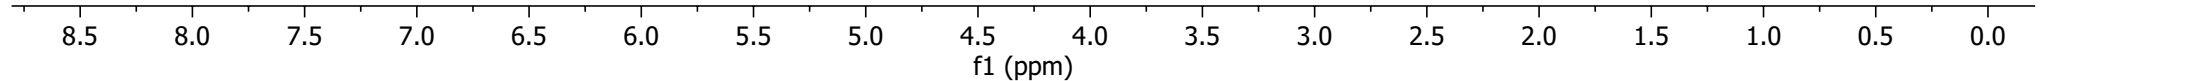

174.90  
171.743  
170.88  
139.73  
136.31  
135.88  
131.66  
129.46  
128.27  
127.77  
127.61  
127.37  
126.72  
77.16 CDCl3  
76.99  
59.26  
53.60  
52.53  
51.98  
51.41  
50.34  
49.17  
37.37

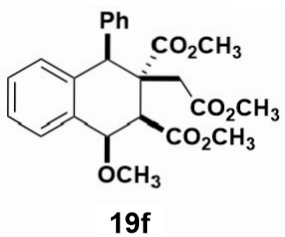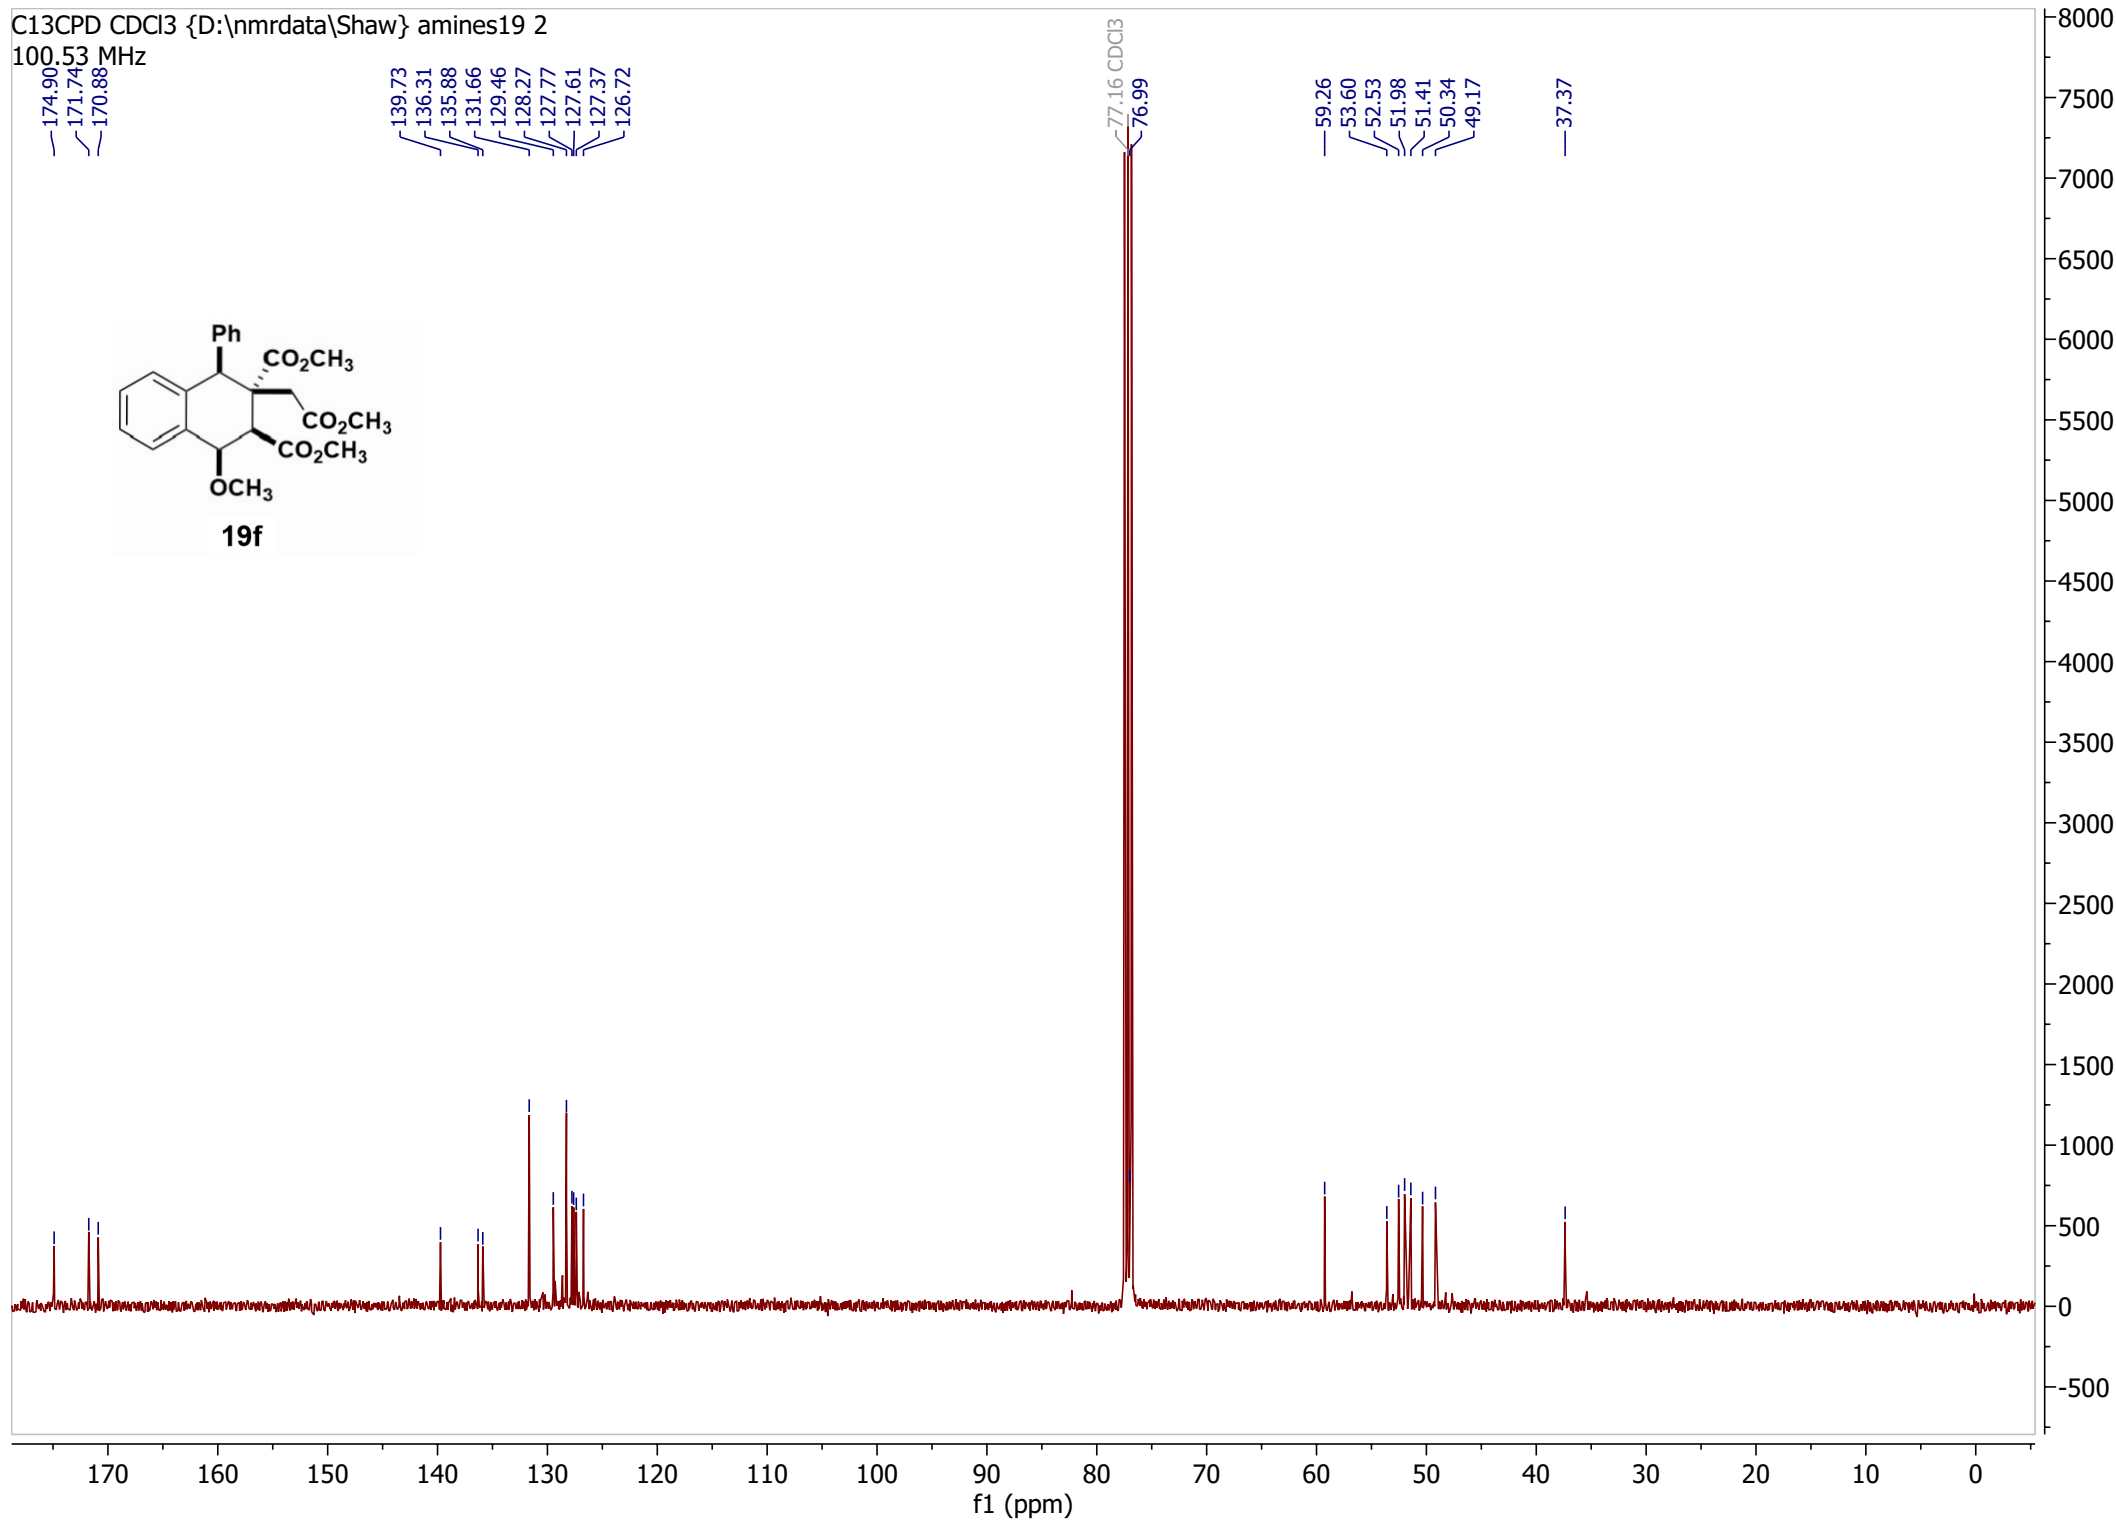

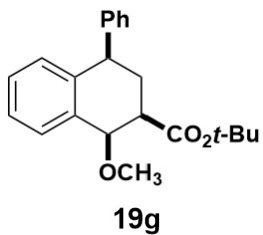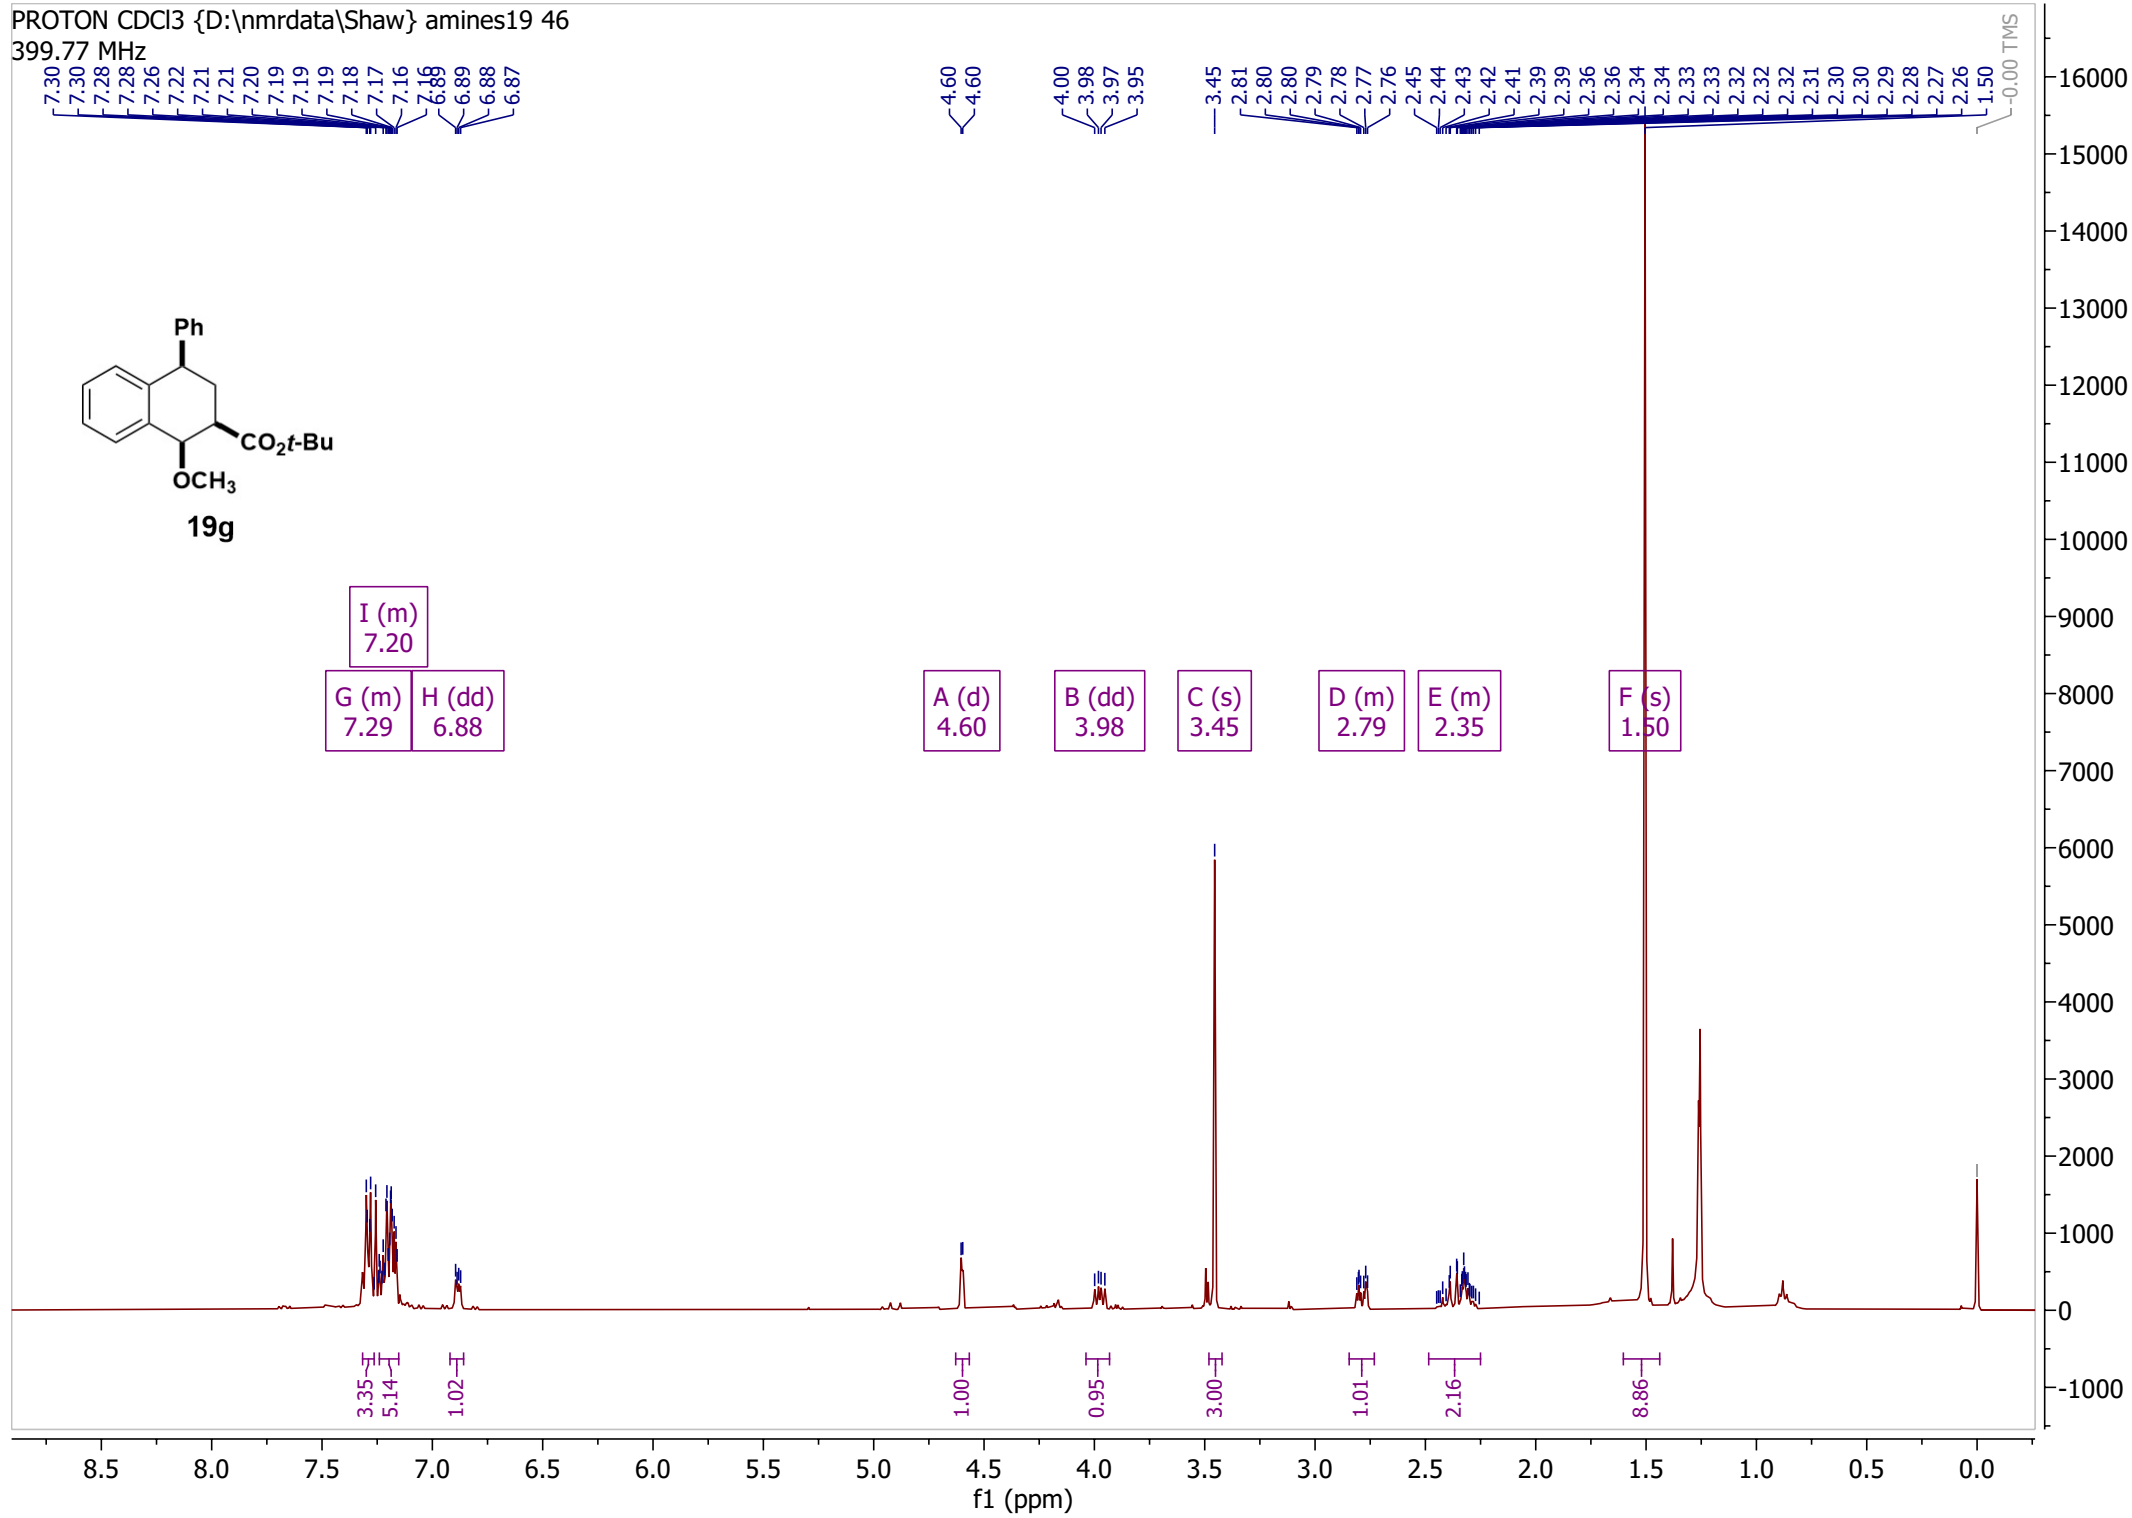

C13CPD CDCl3 {D:\nmrdata\Shaw} amines19 46

100.53 MHz

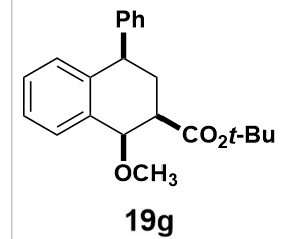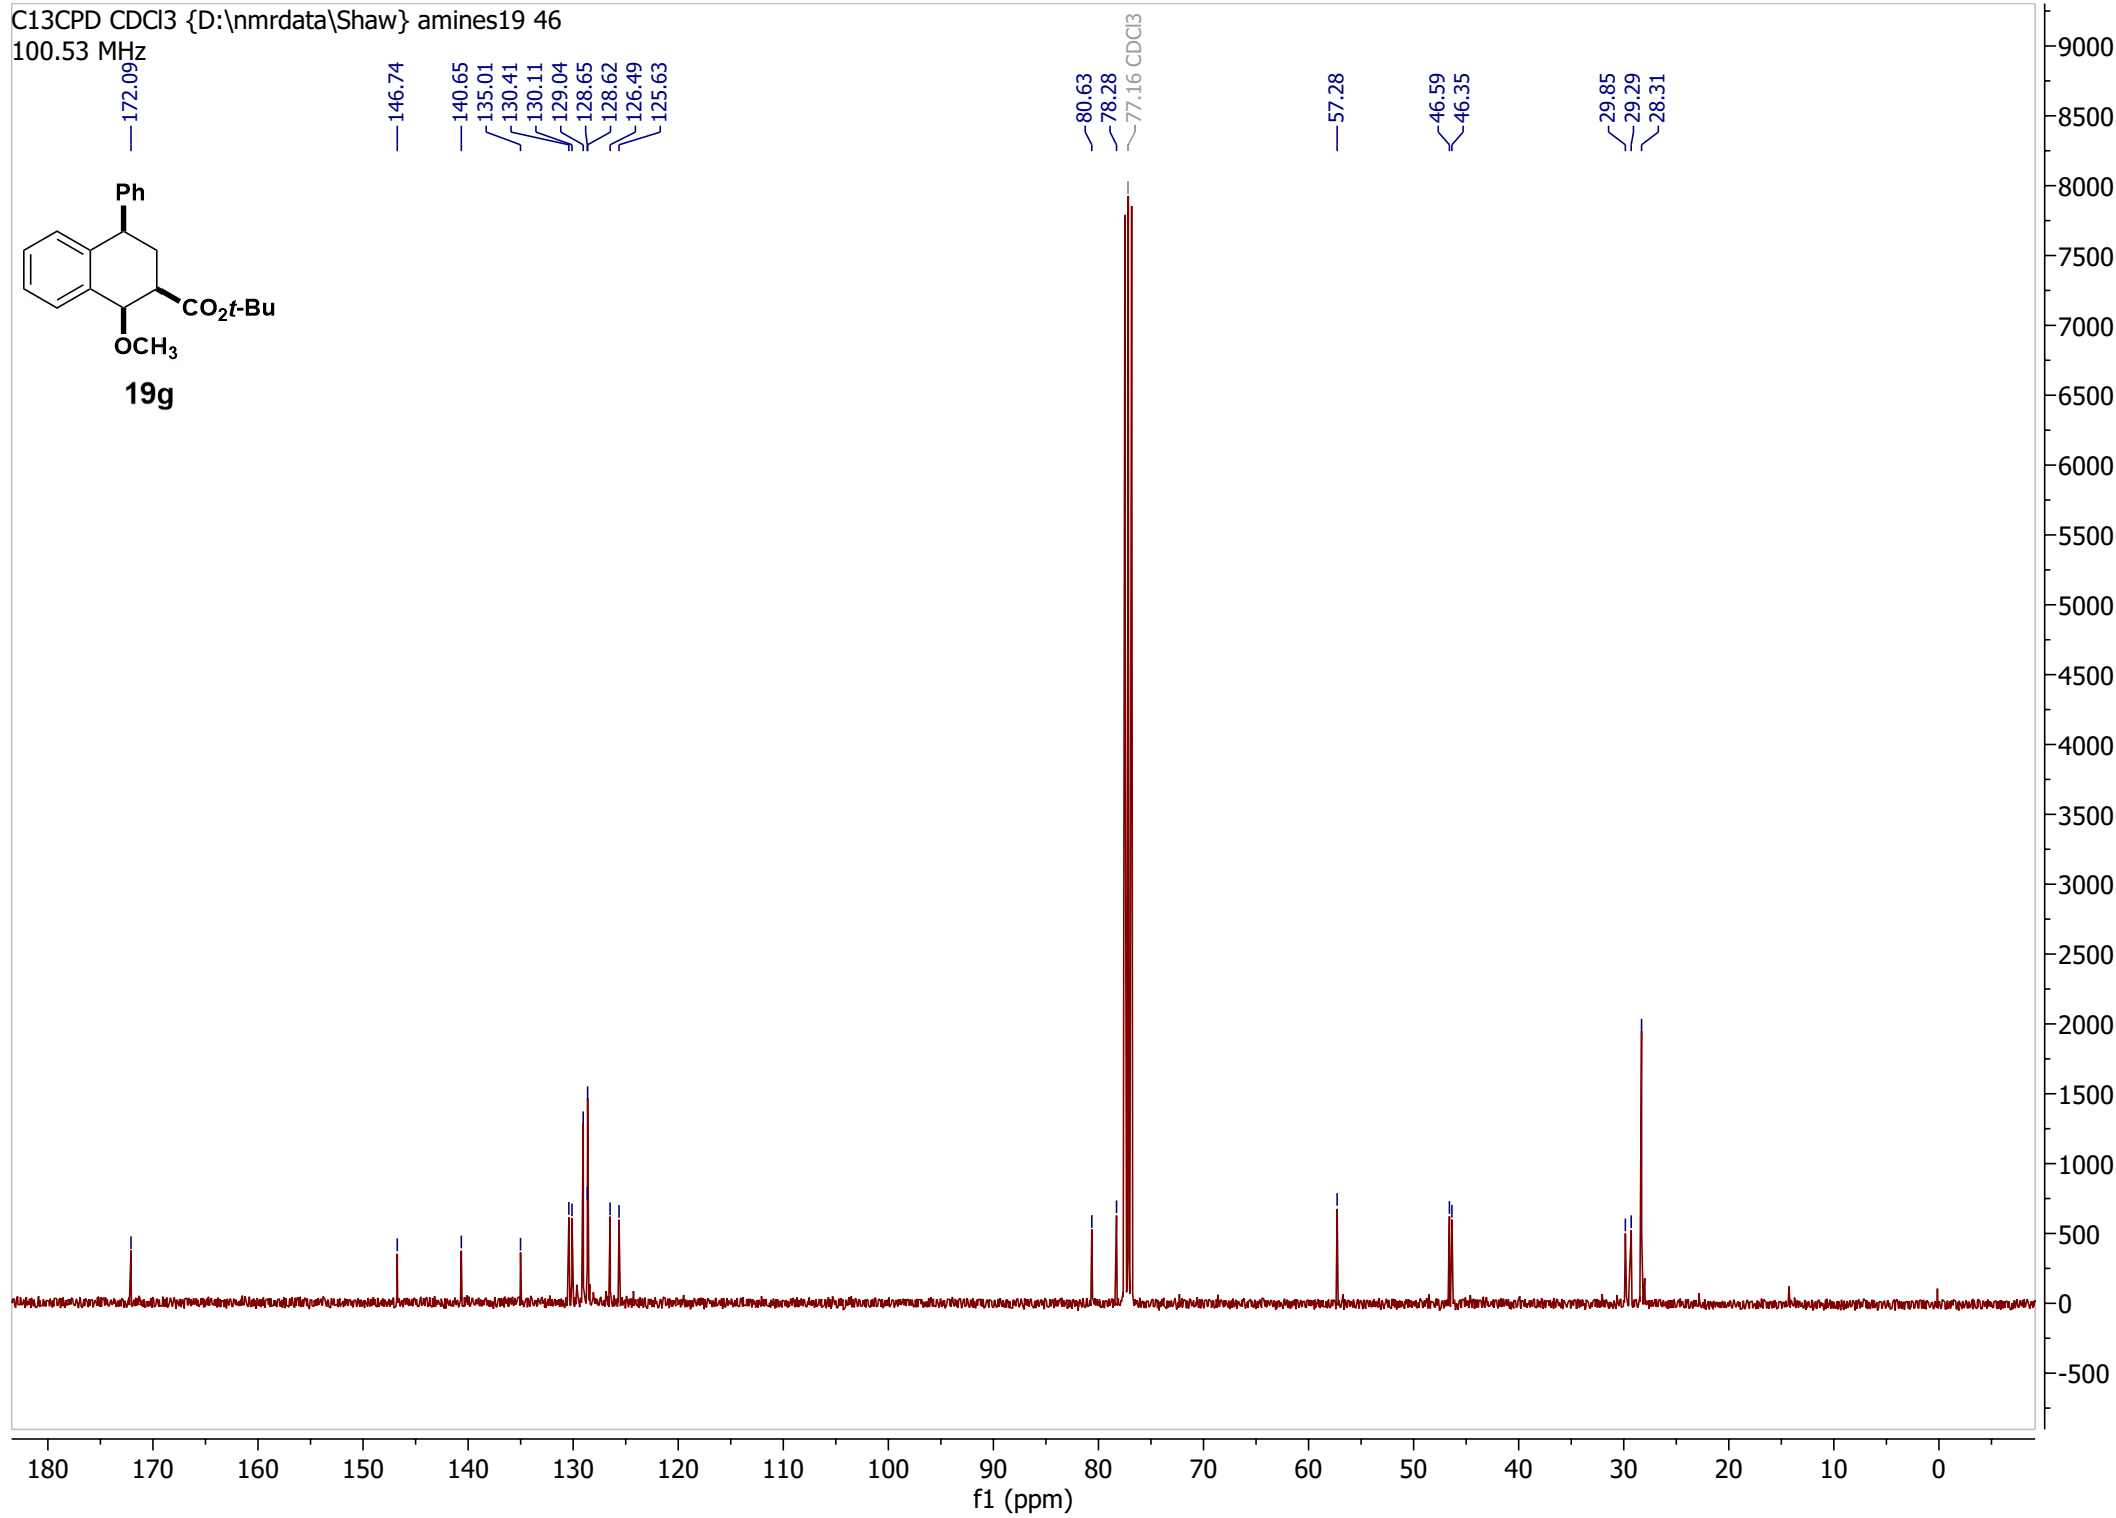

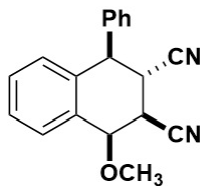

19h

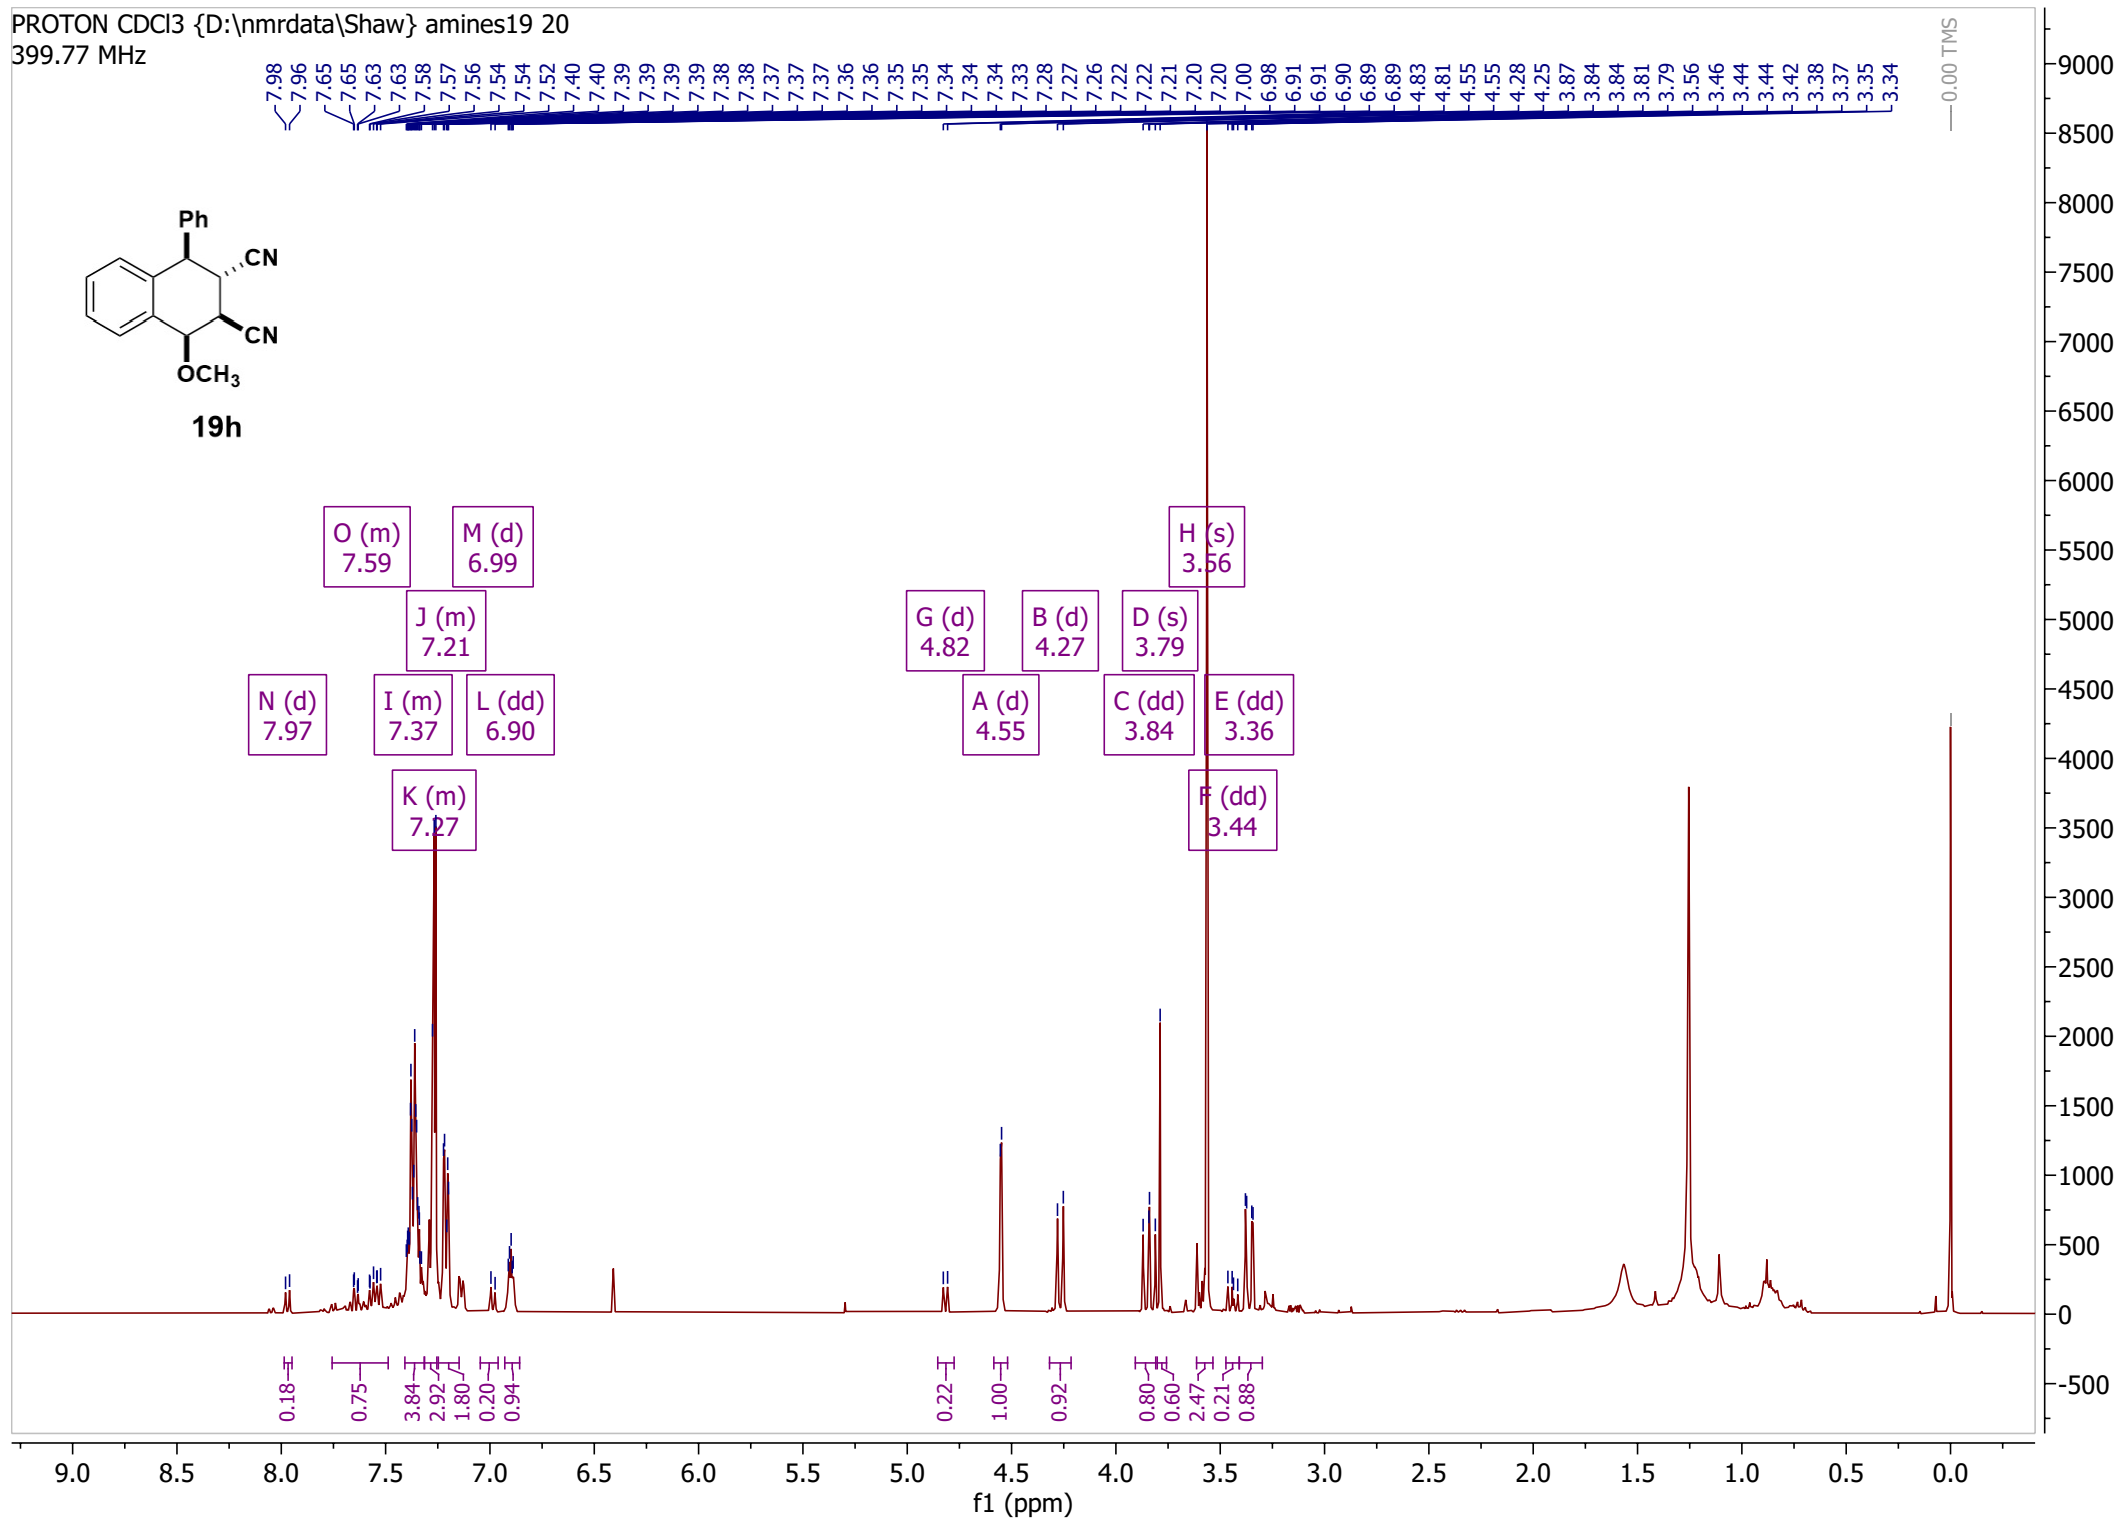

C13CPD CDCl3 {D:\nmrdata\Shaw} amines19 44

100.53 MHz

141.37  
138.13  
136.02  
134.40  
133.63  
131.26  
130.60  
130.26  
130.21  
129.79  
129.44  
129.36  
129.08  
128.94  
128.57  
128.47  
128.35  
128.31  
127.12  
118.77  
117.24  
116.72

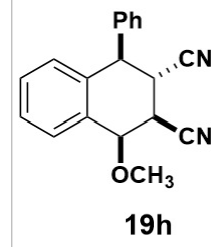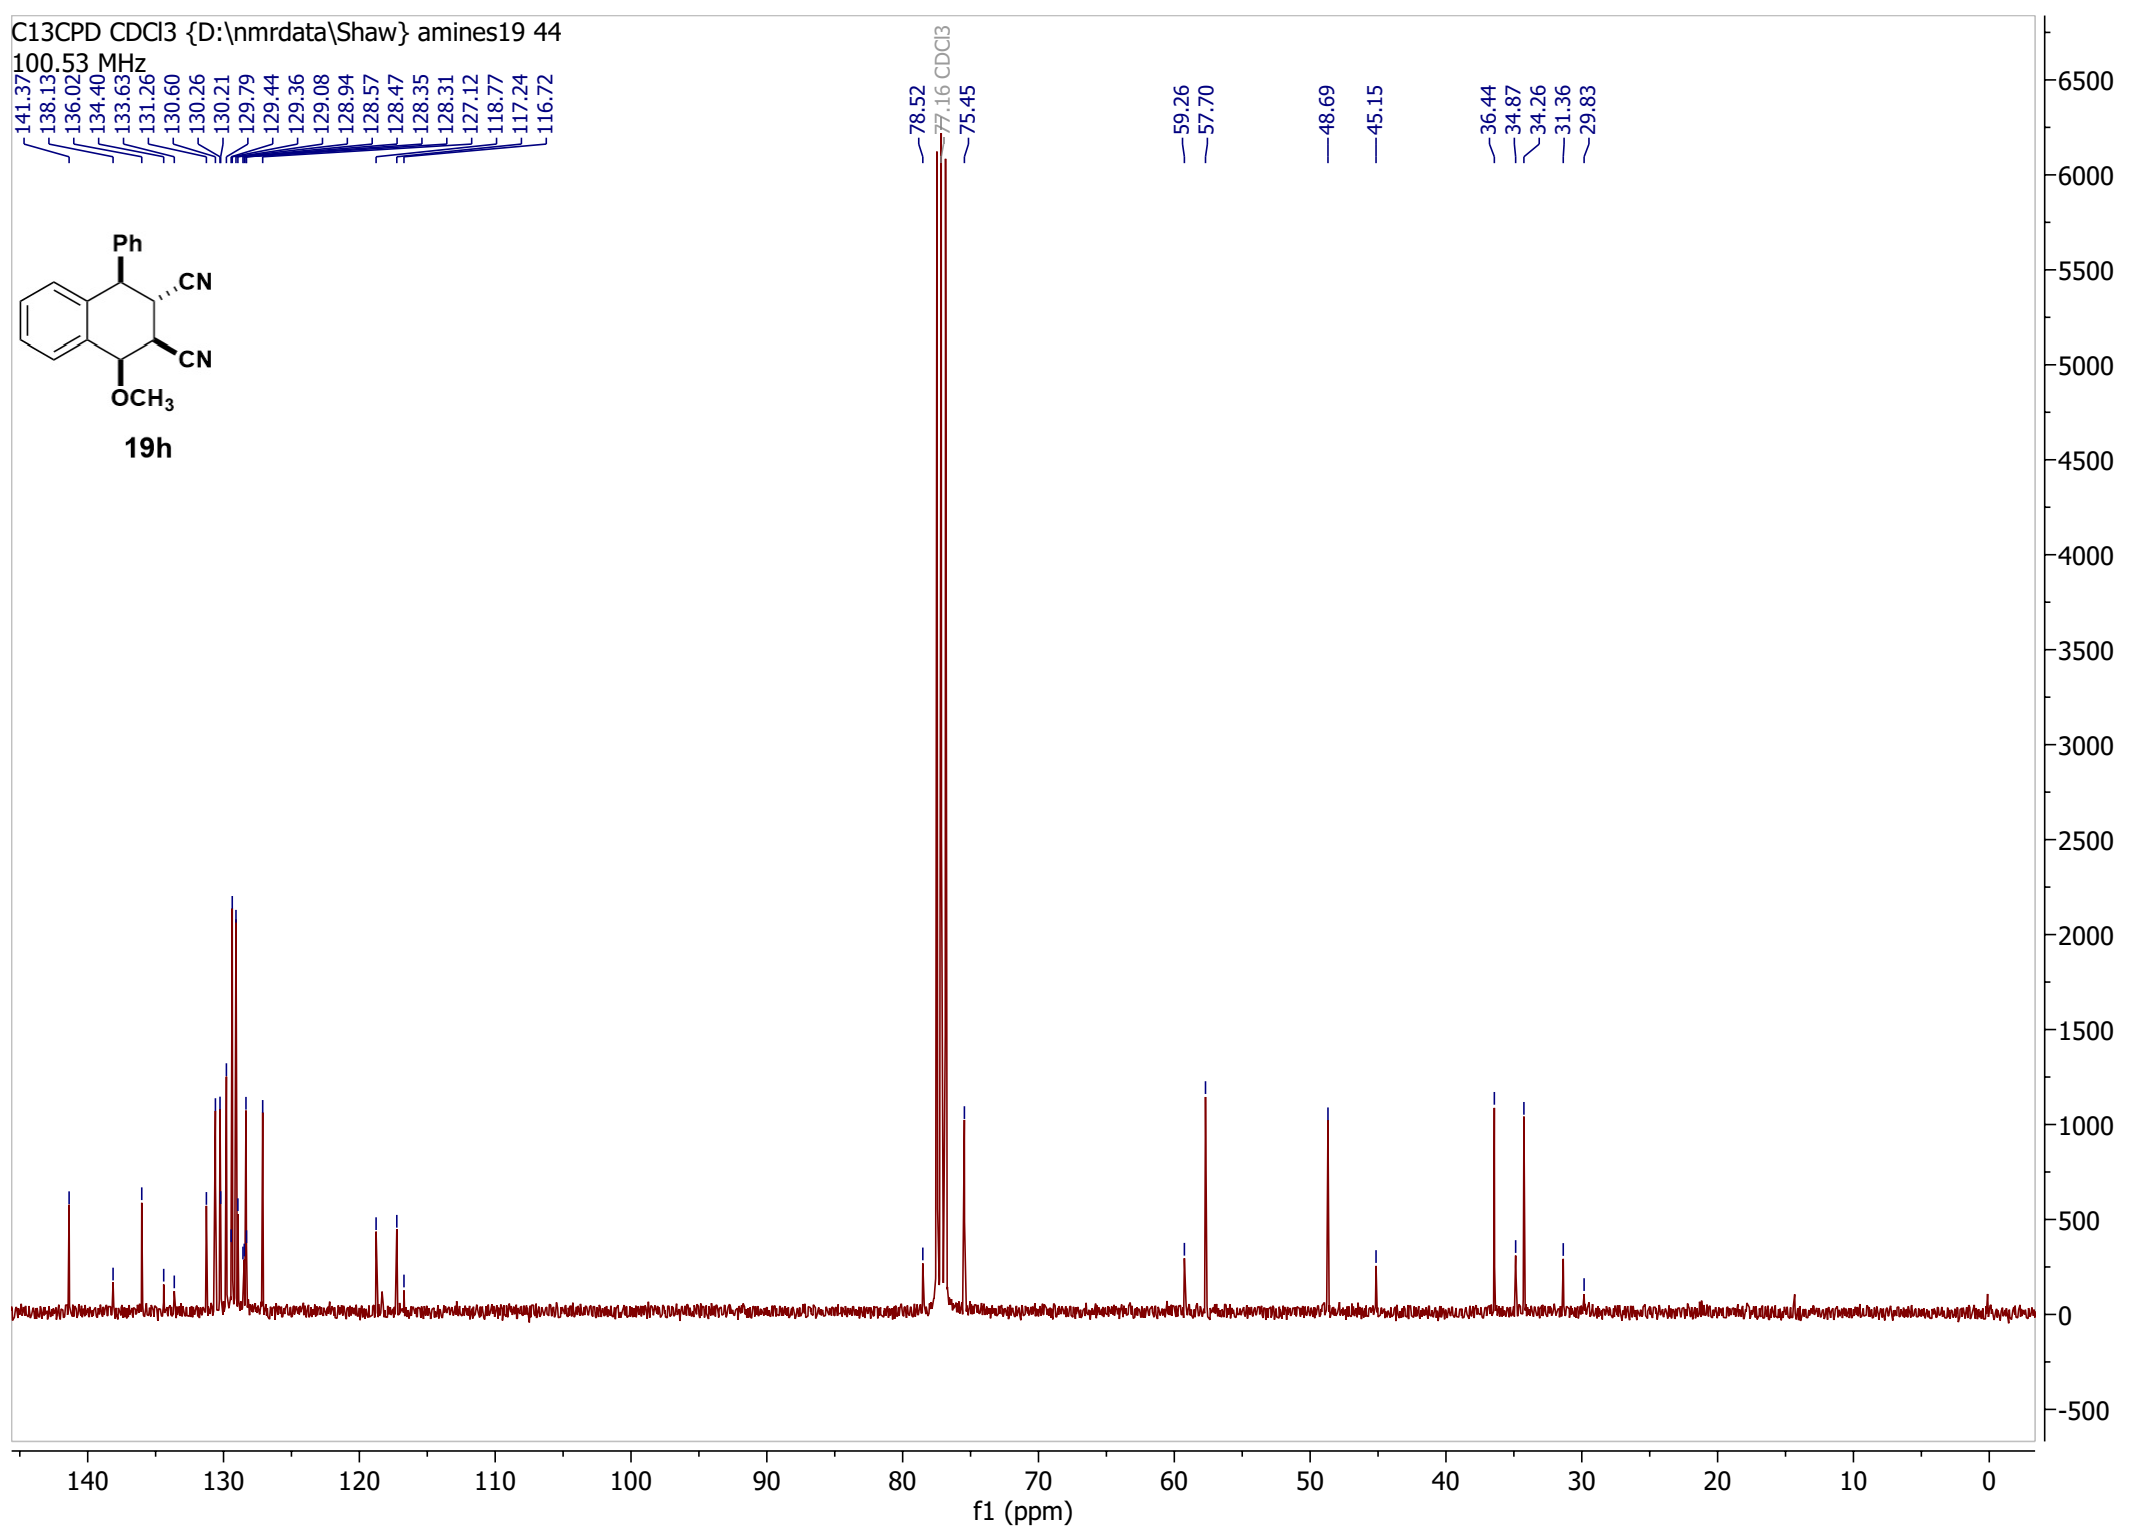

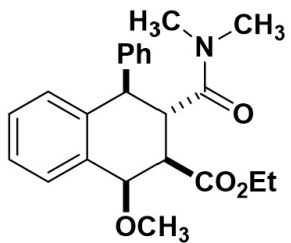

**19i**

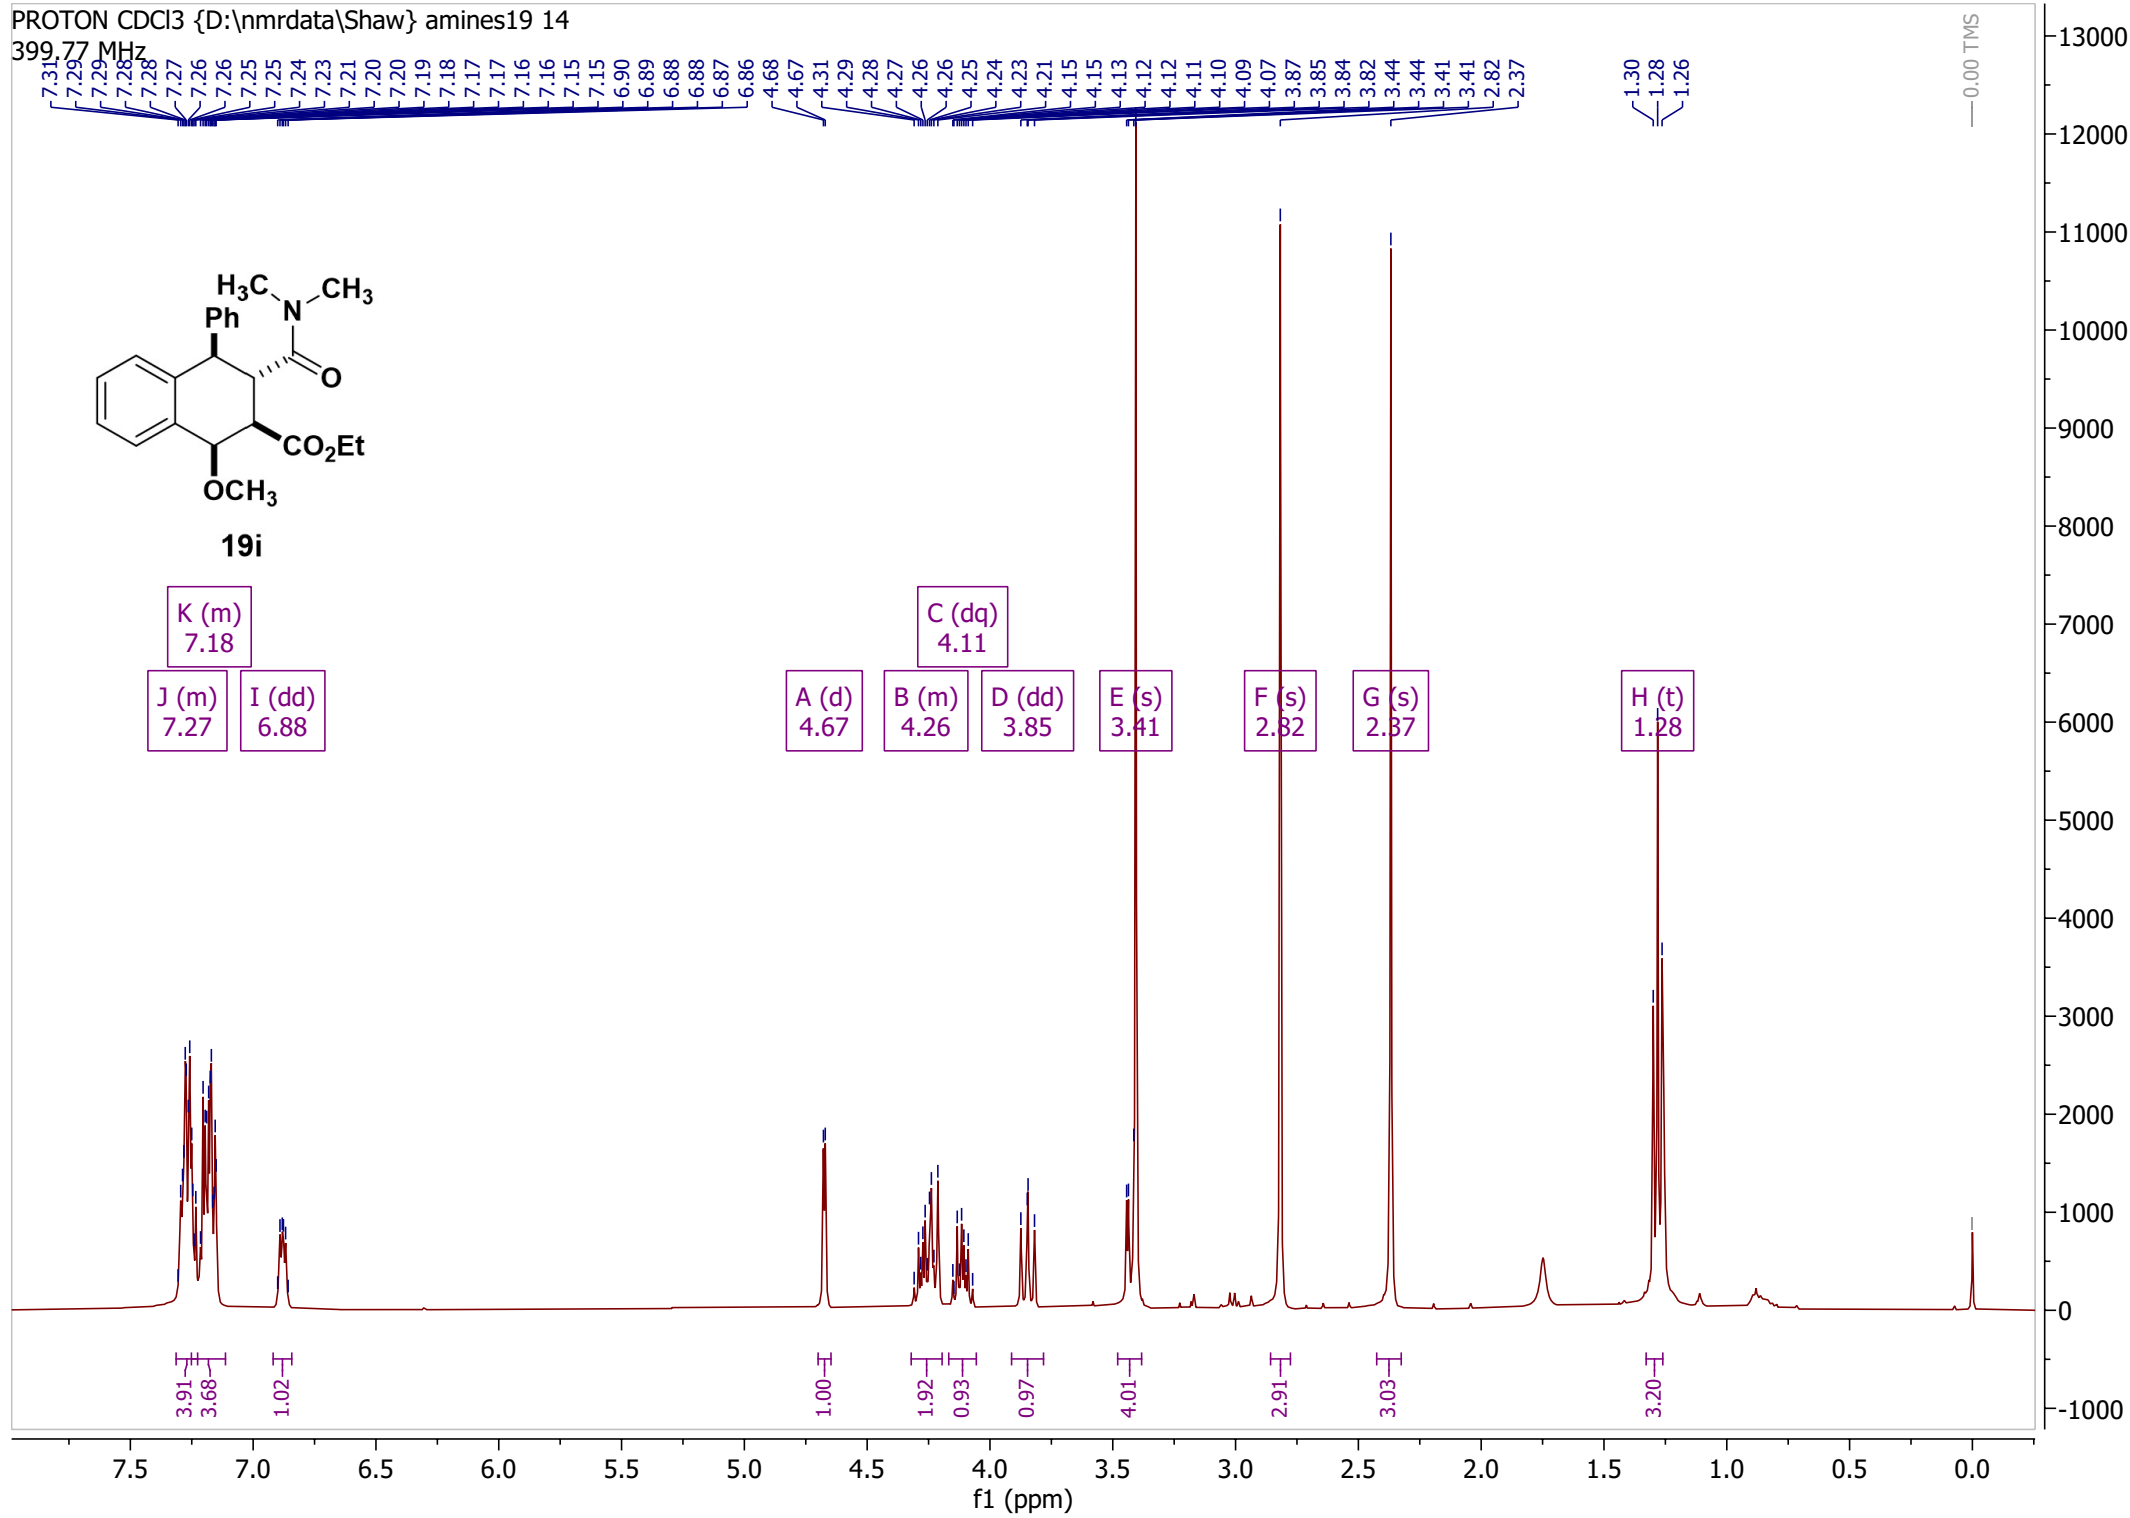



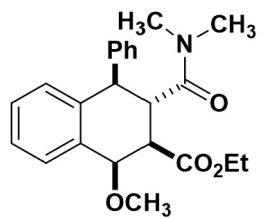

**19i**

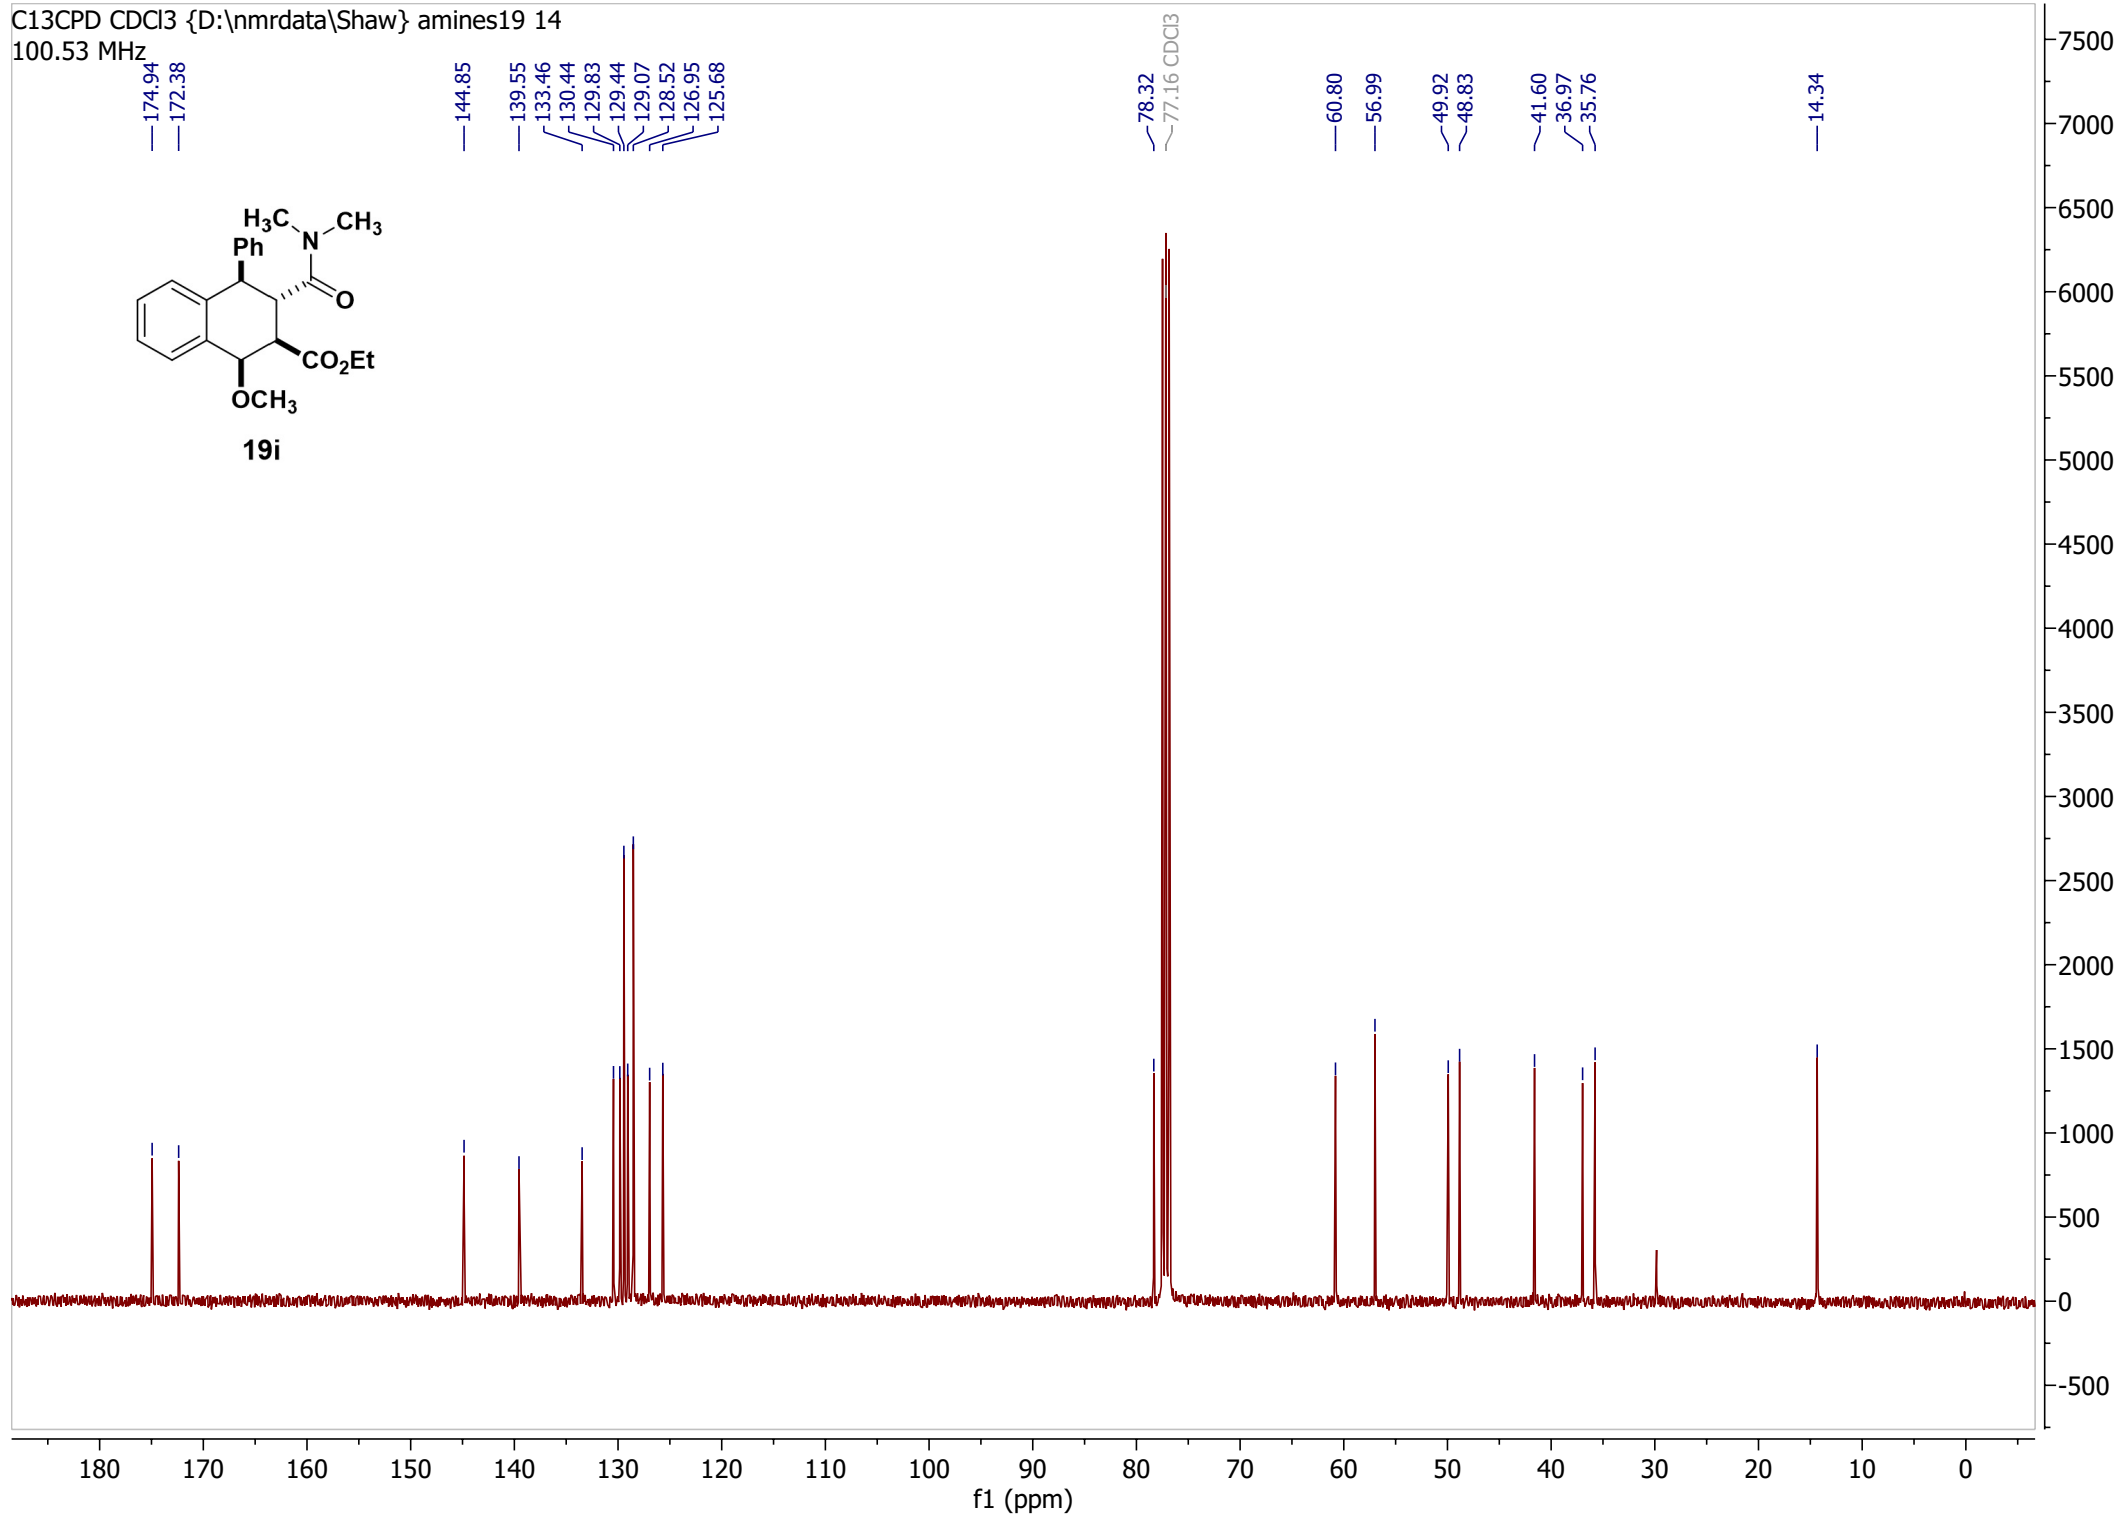

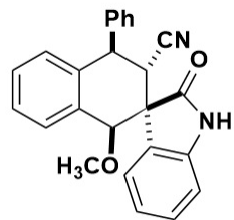

**19j**

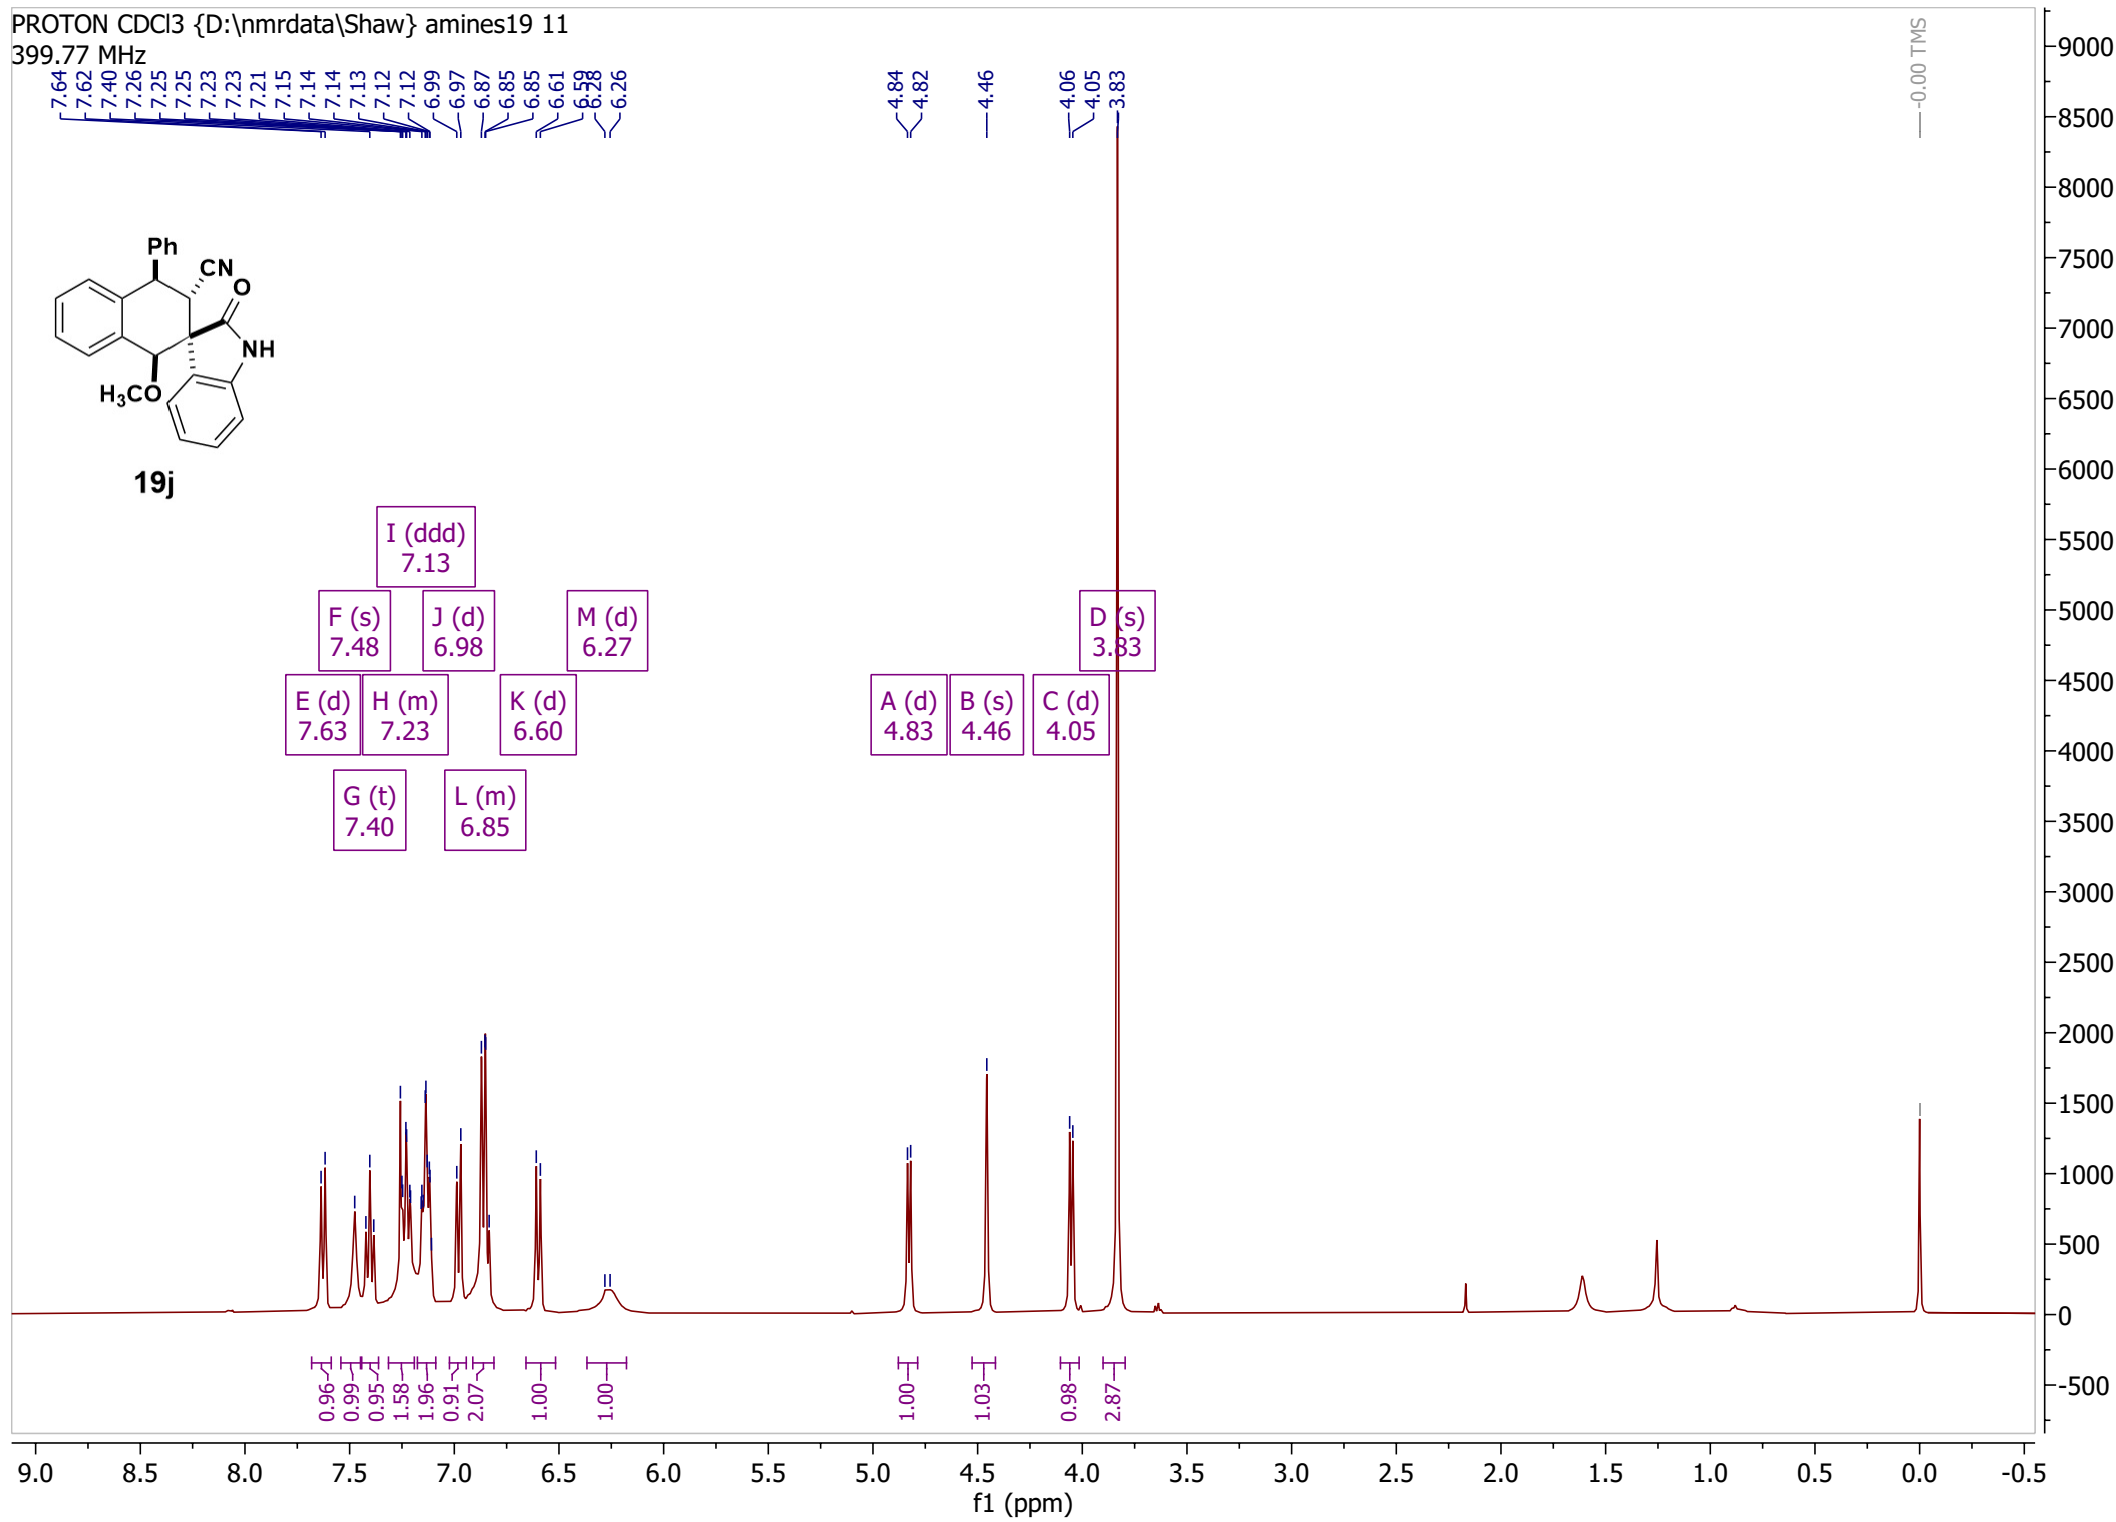

C13CPD CDCl3 {D:\nmrdata\Shaw} amines19 11

100.53 MHz

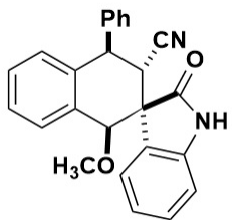

19j

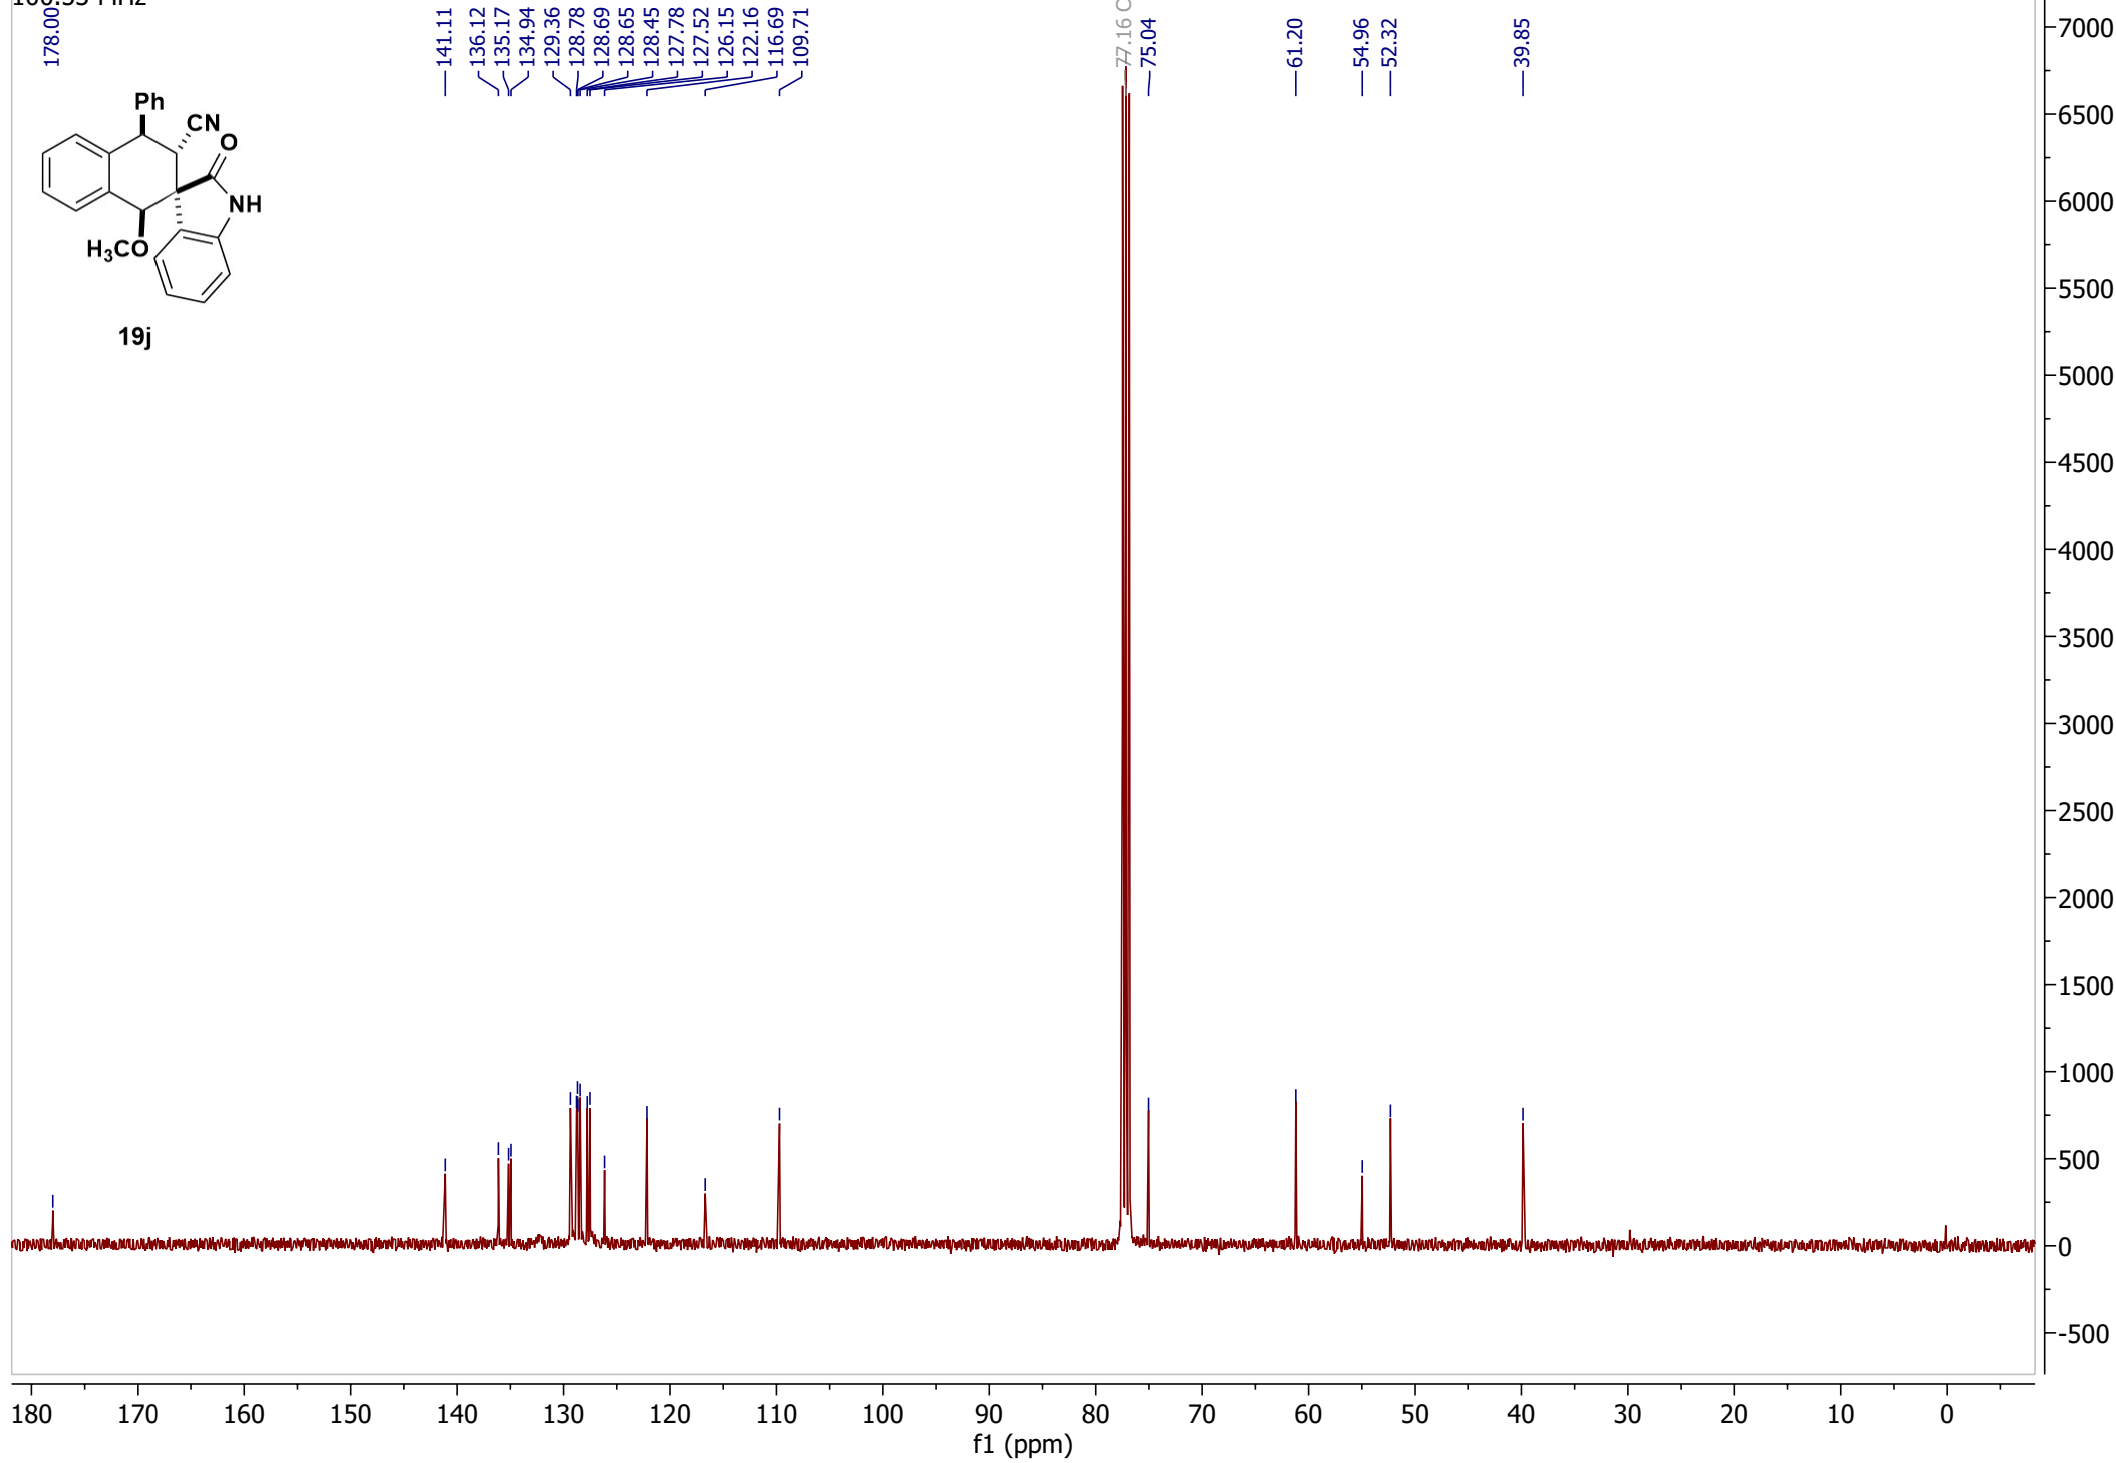

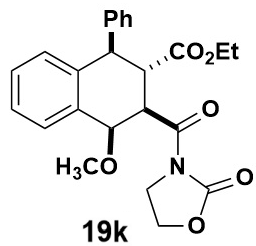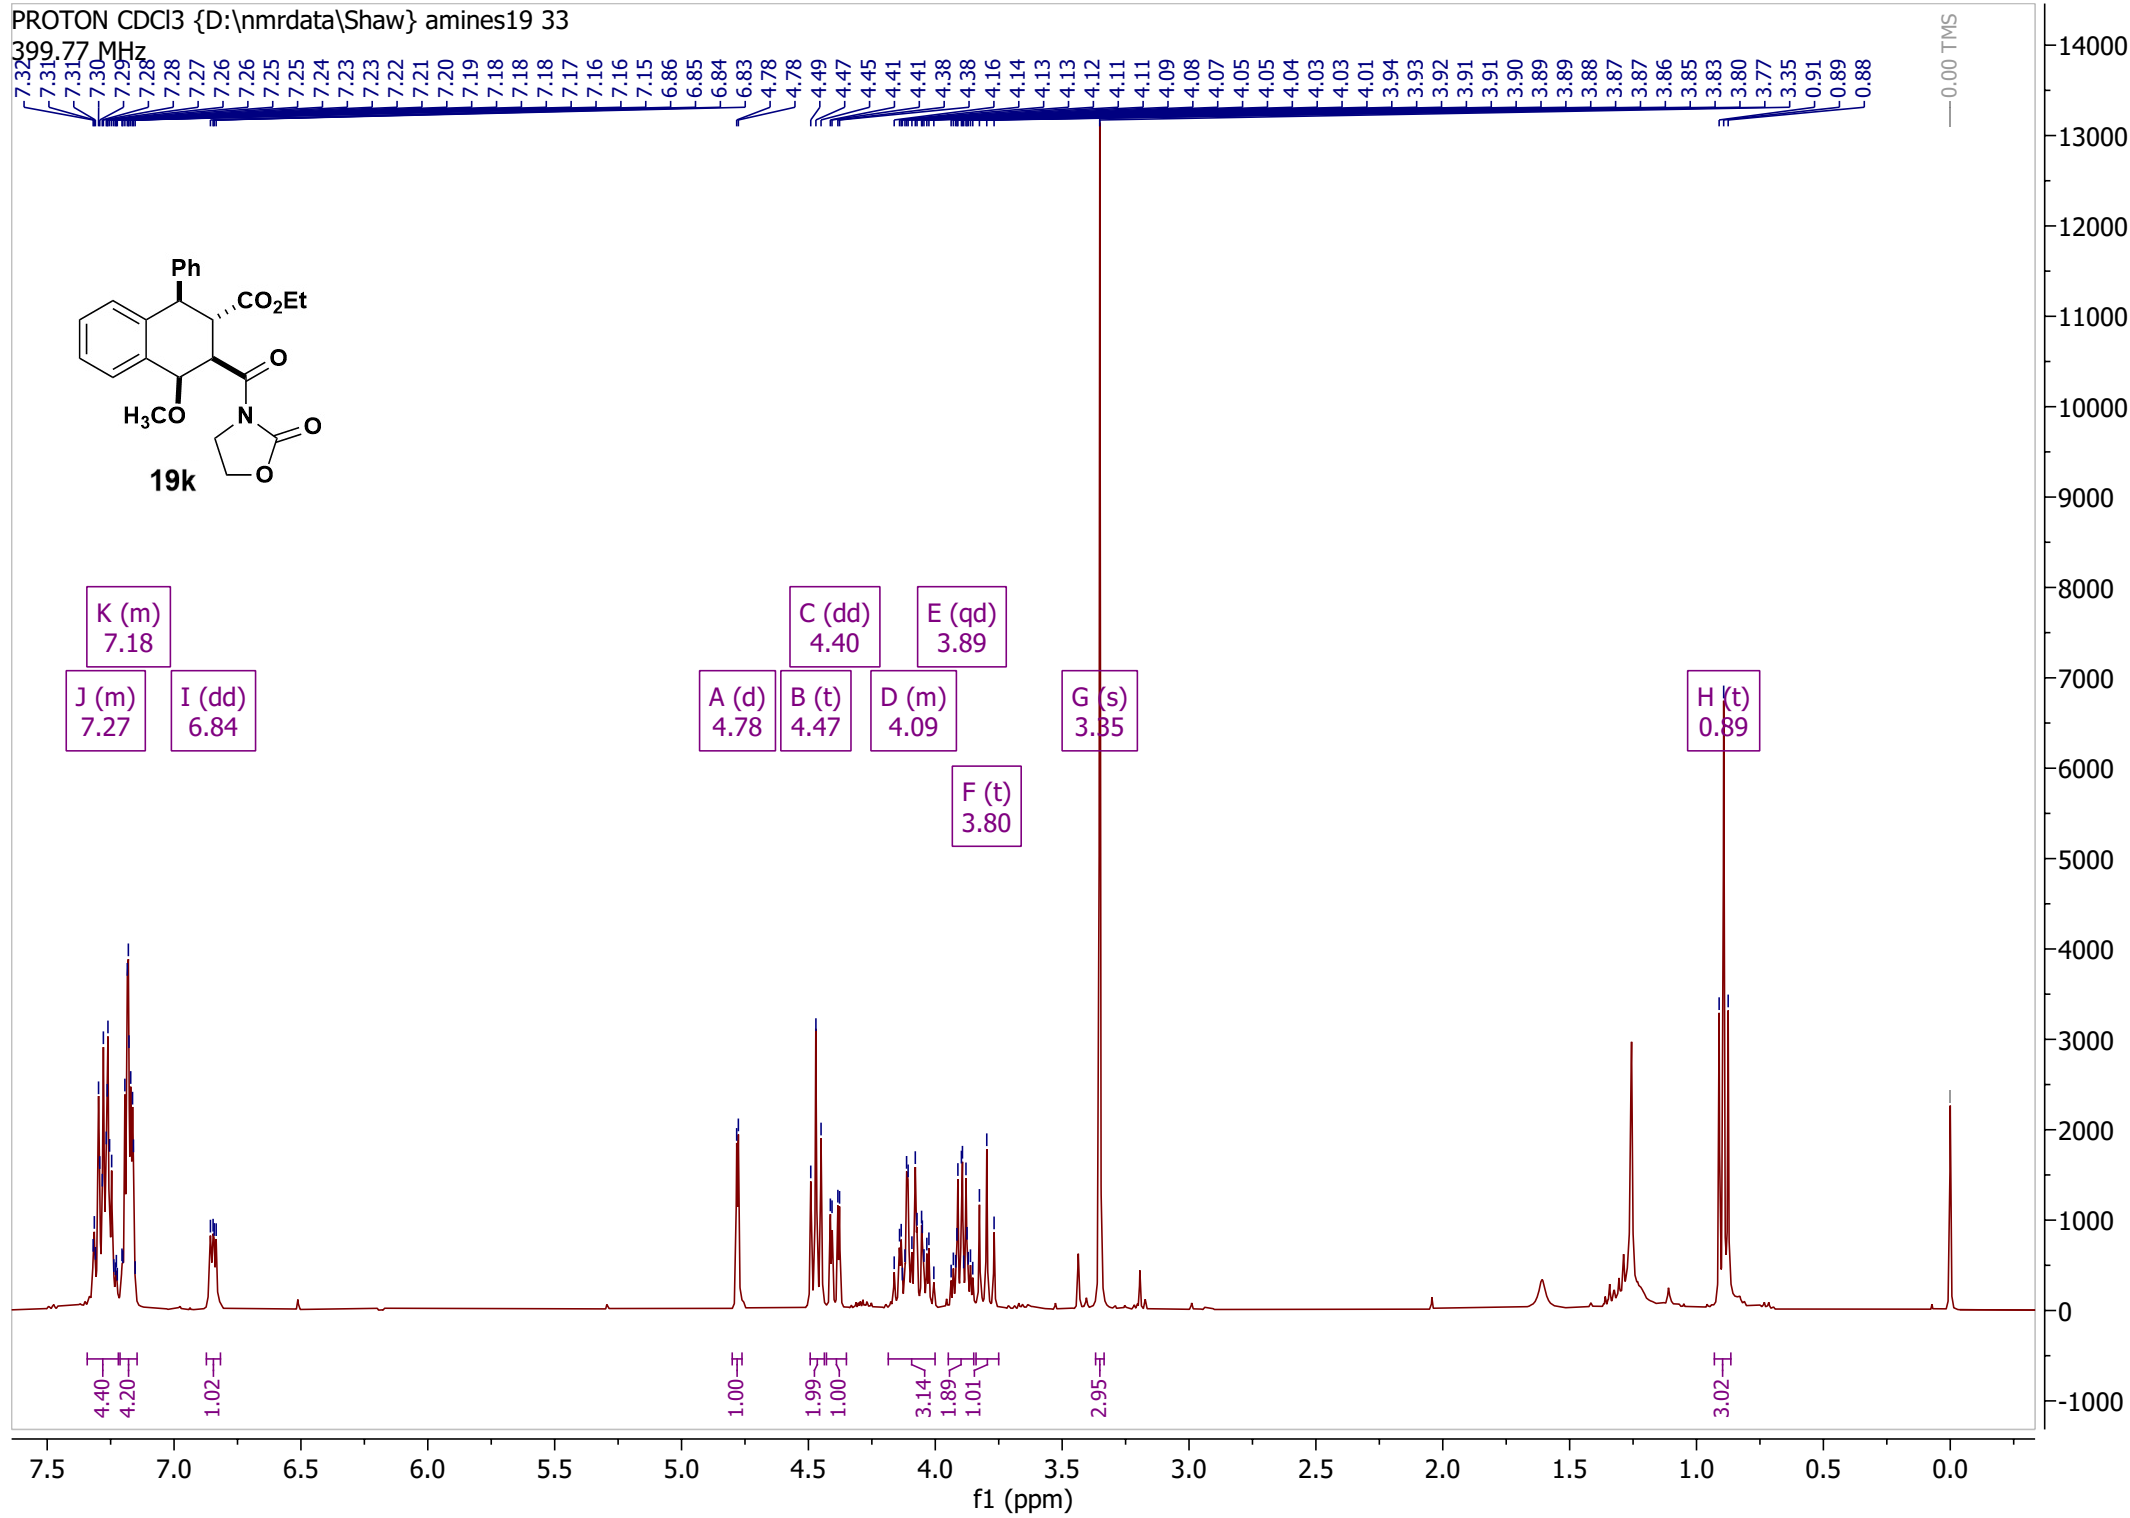

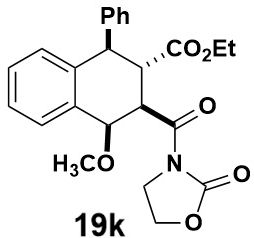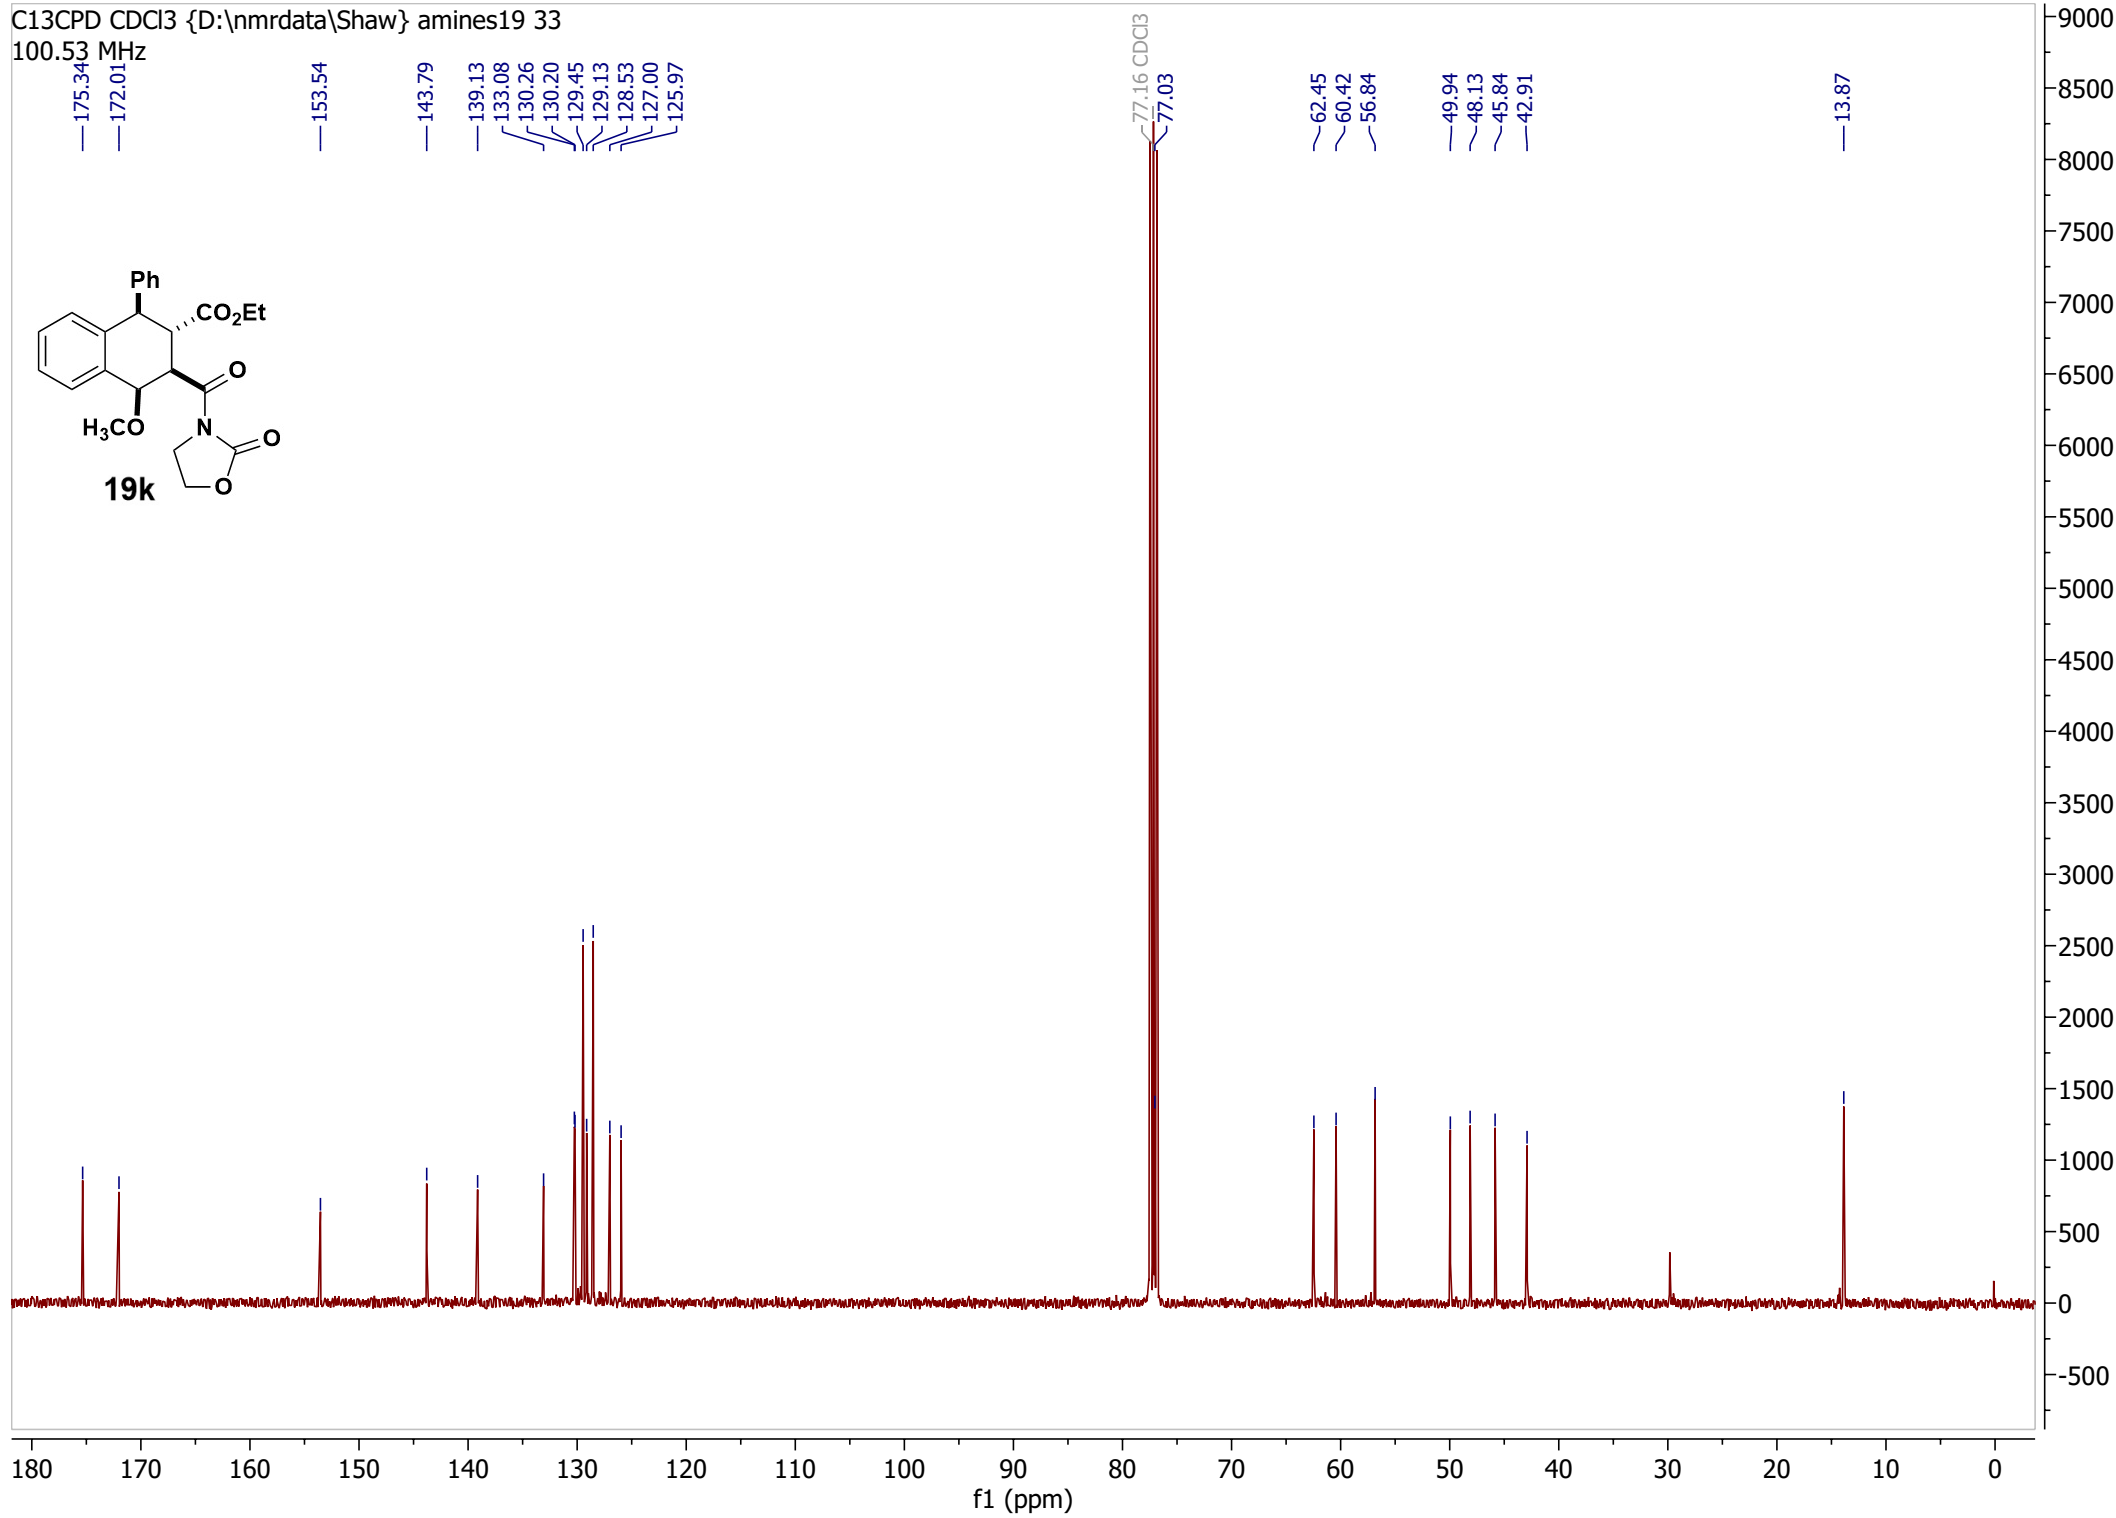

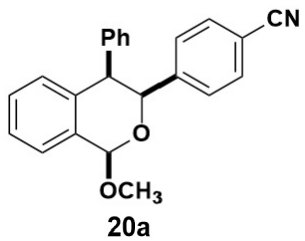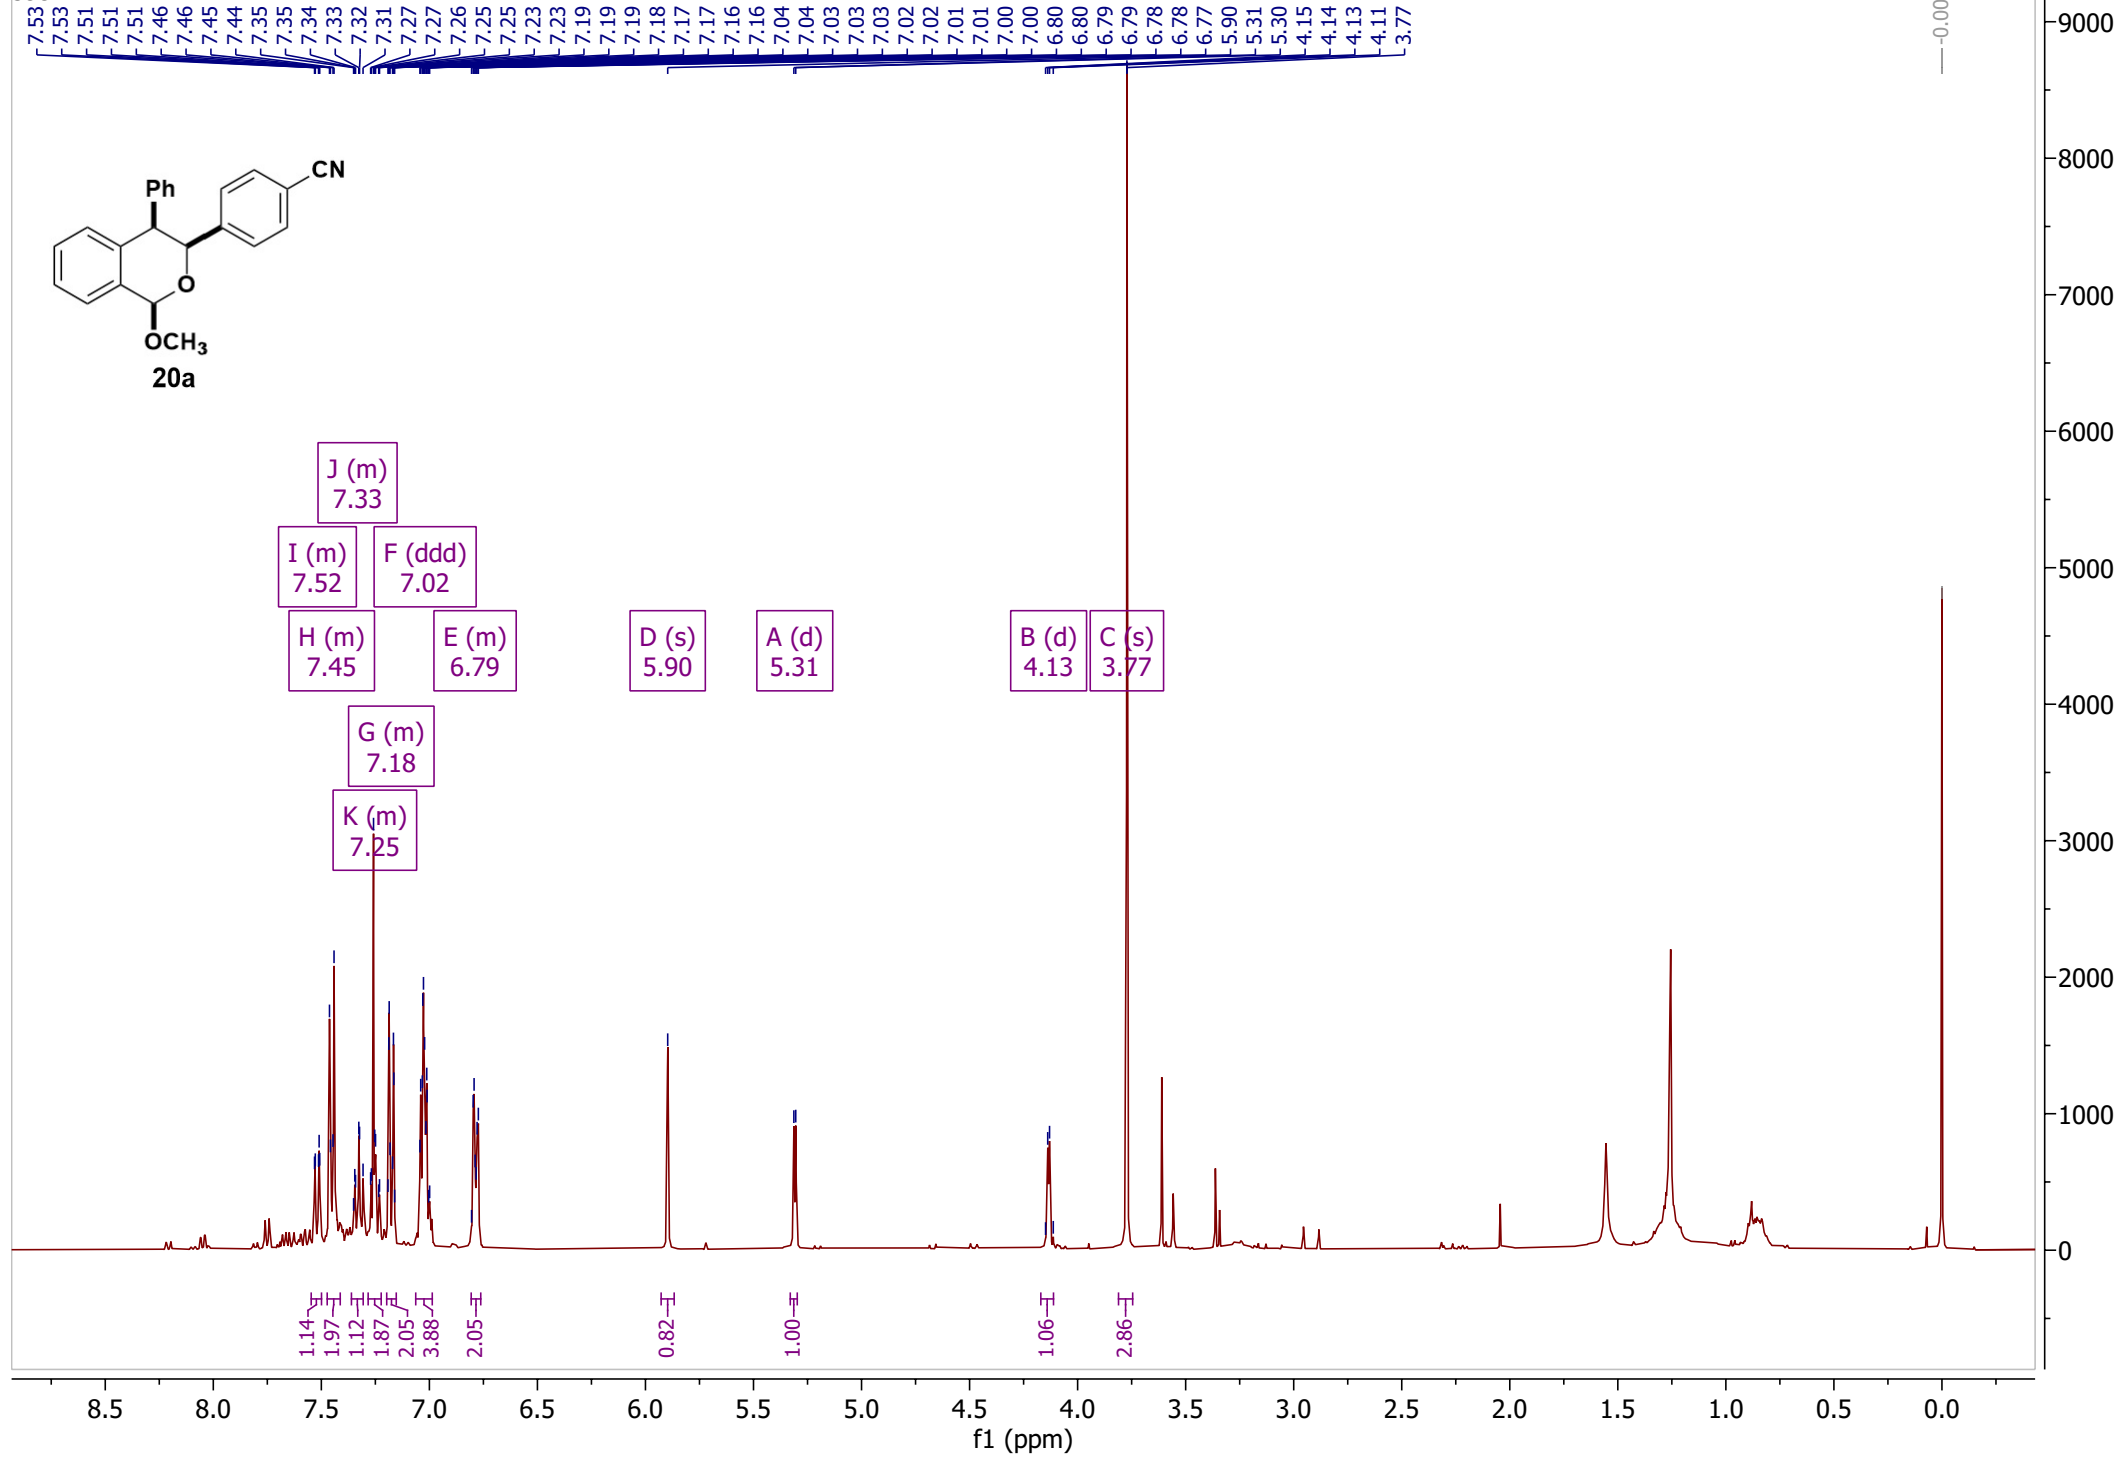

C13CPD CDCl3 {D:\nmrdata\Shaw} amines19 36  
100.53 MHz

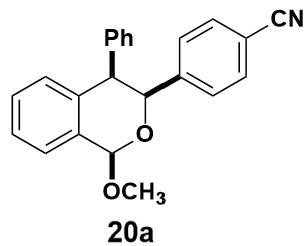

145.41  
139.62  
137.81  
134.28  
131.72  
130.15  
129.83  
129.40  
128.90  
128.67  
127.75  
127.45  
126.76  
126.67  
125.92  
119.06

110.89

101.77

77.16 CDCl3  
76.53

56.61

50.23

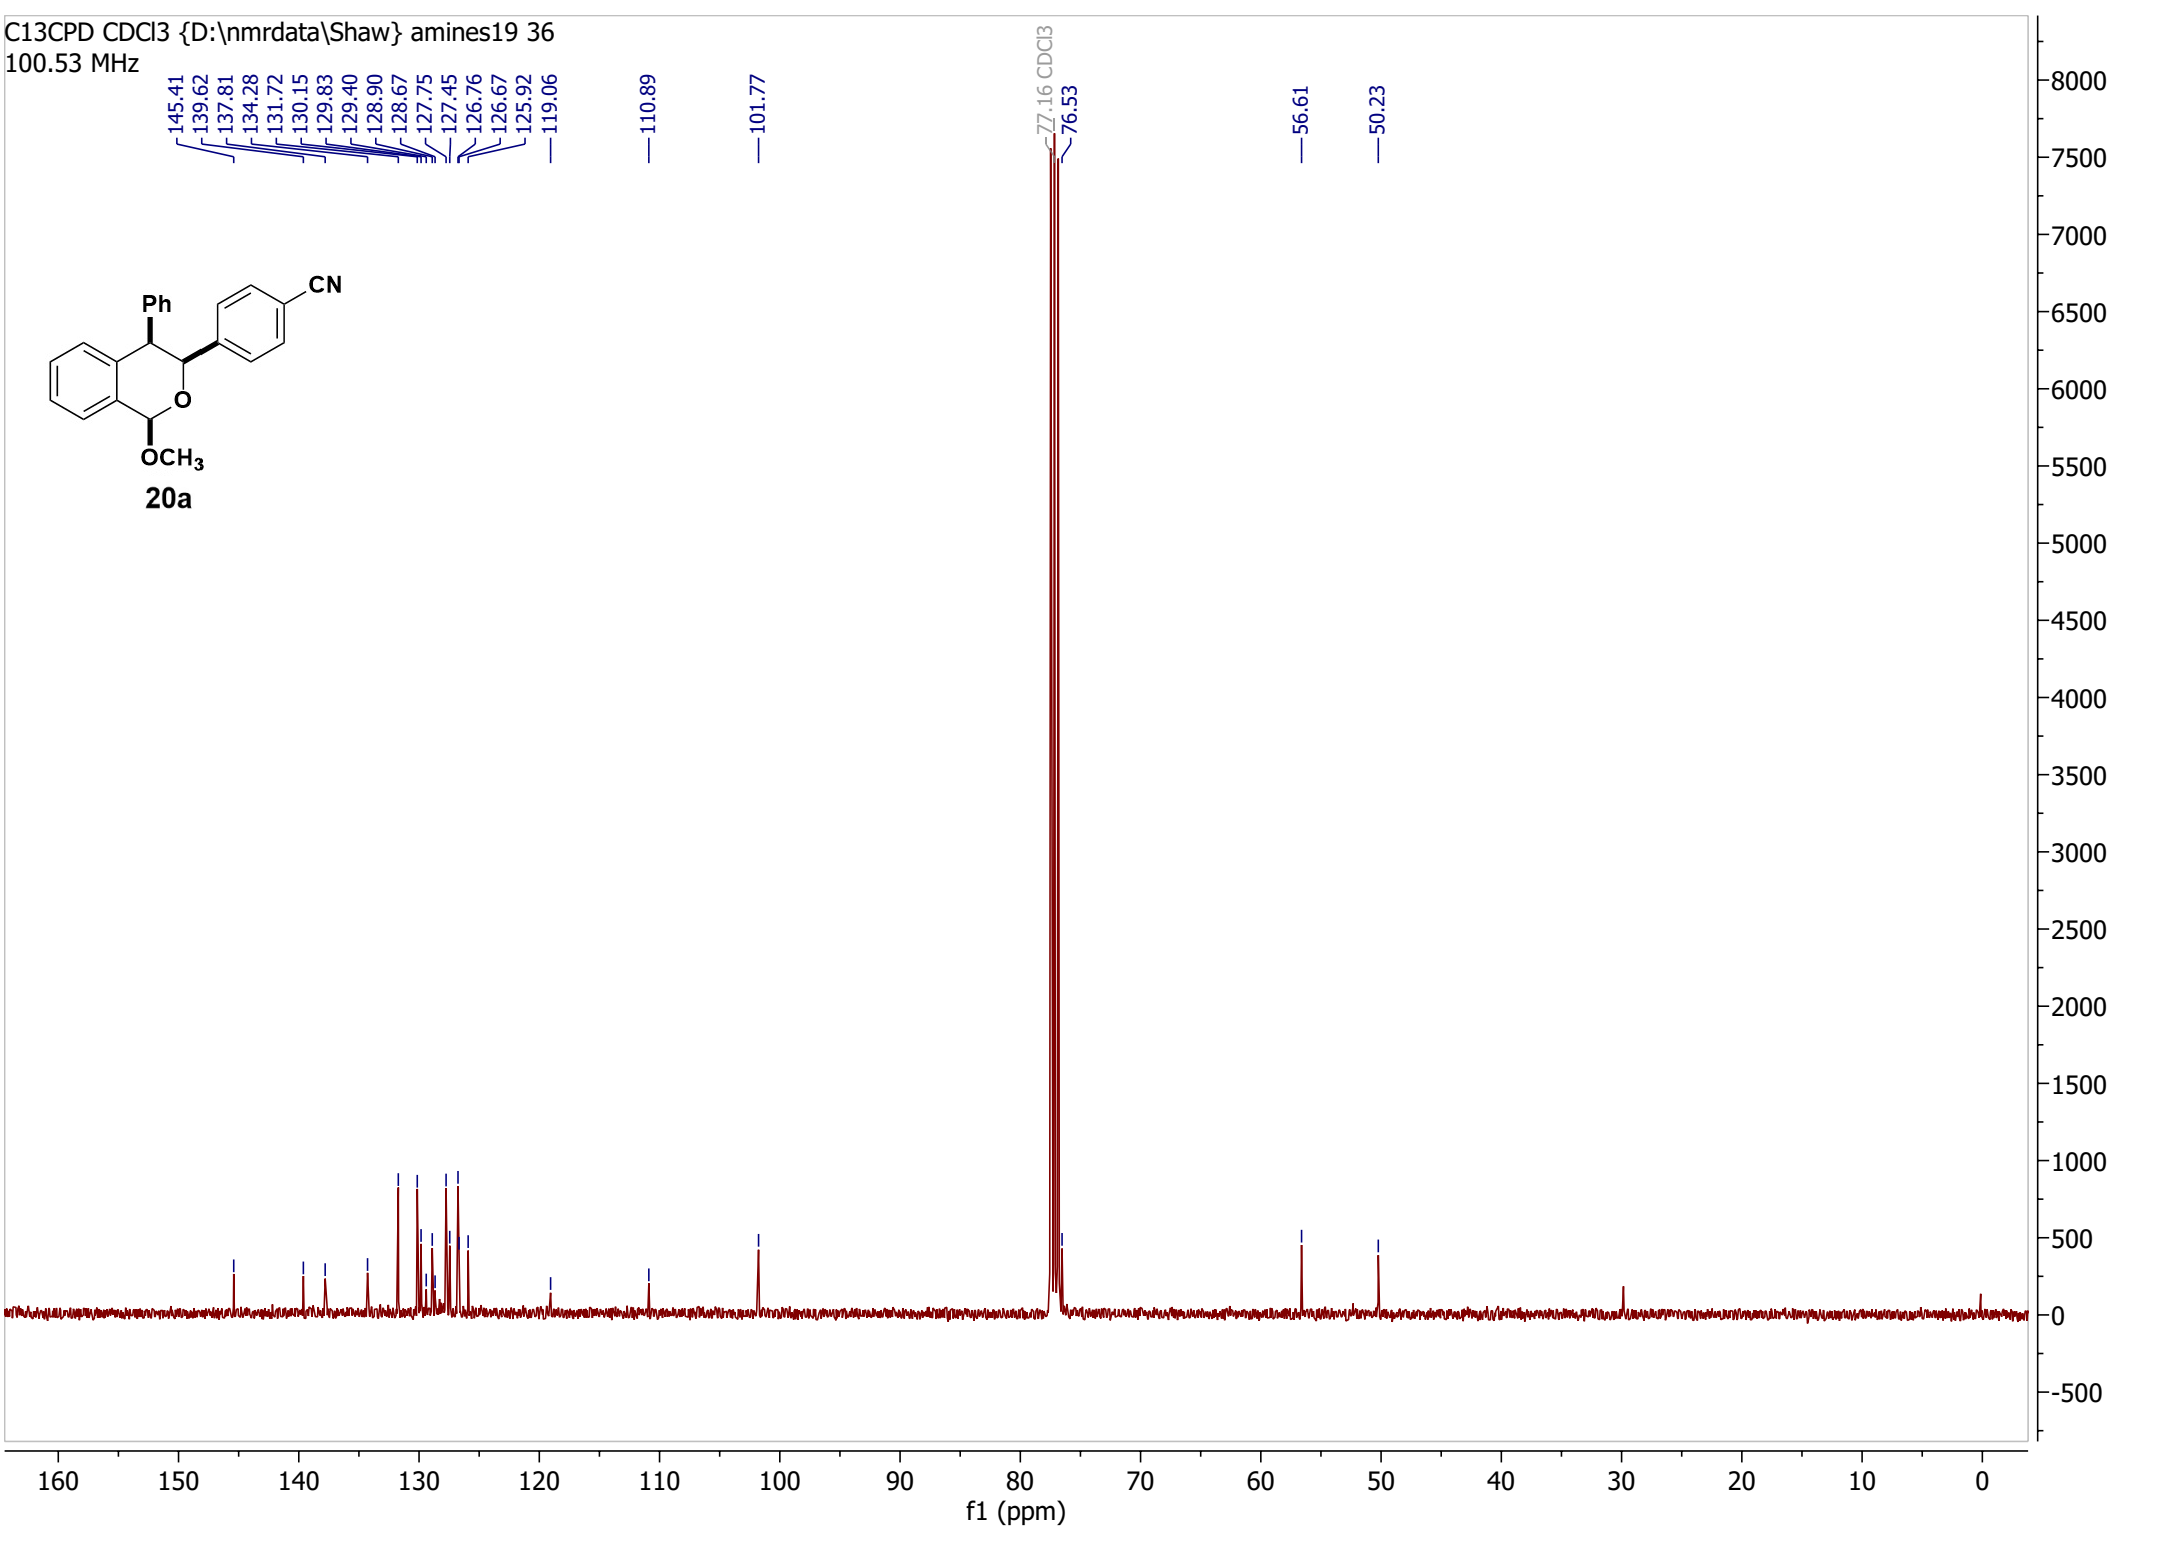

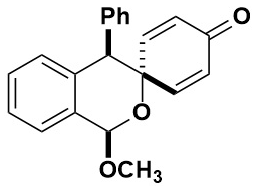

20b

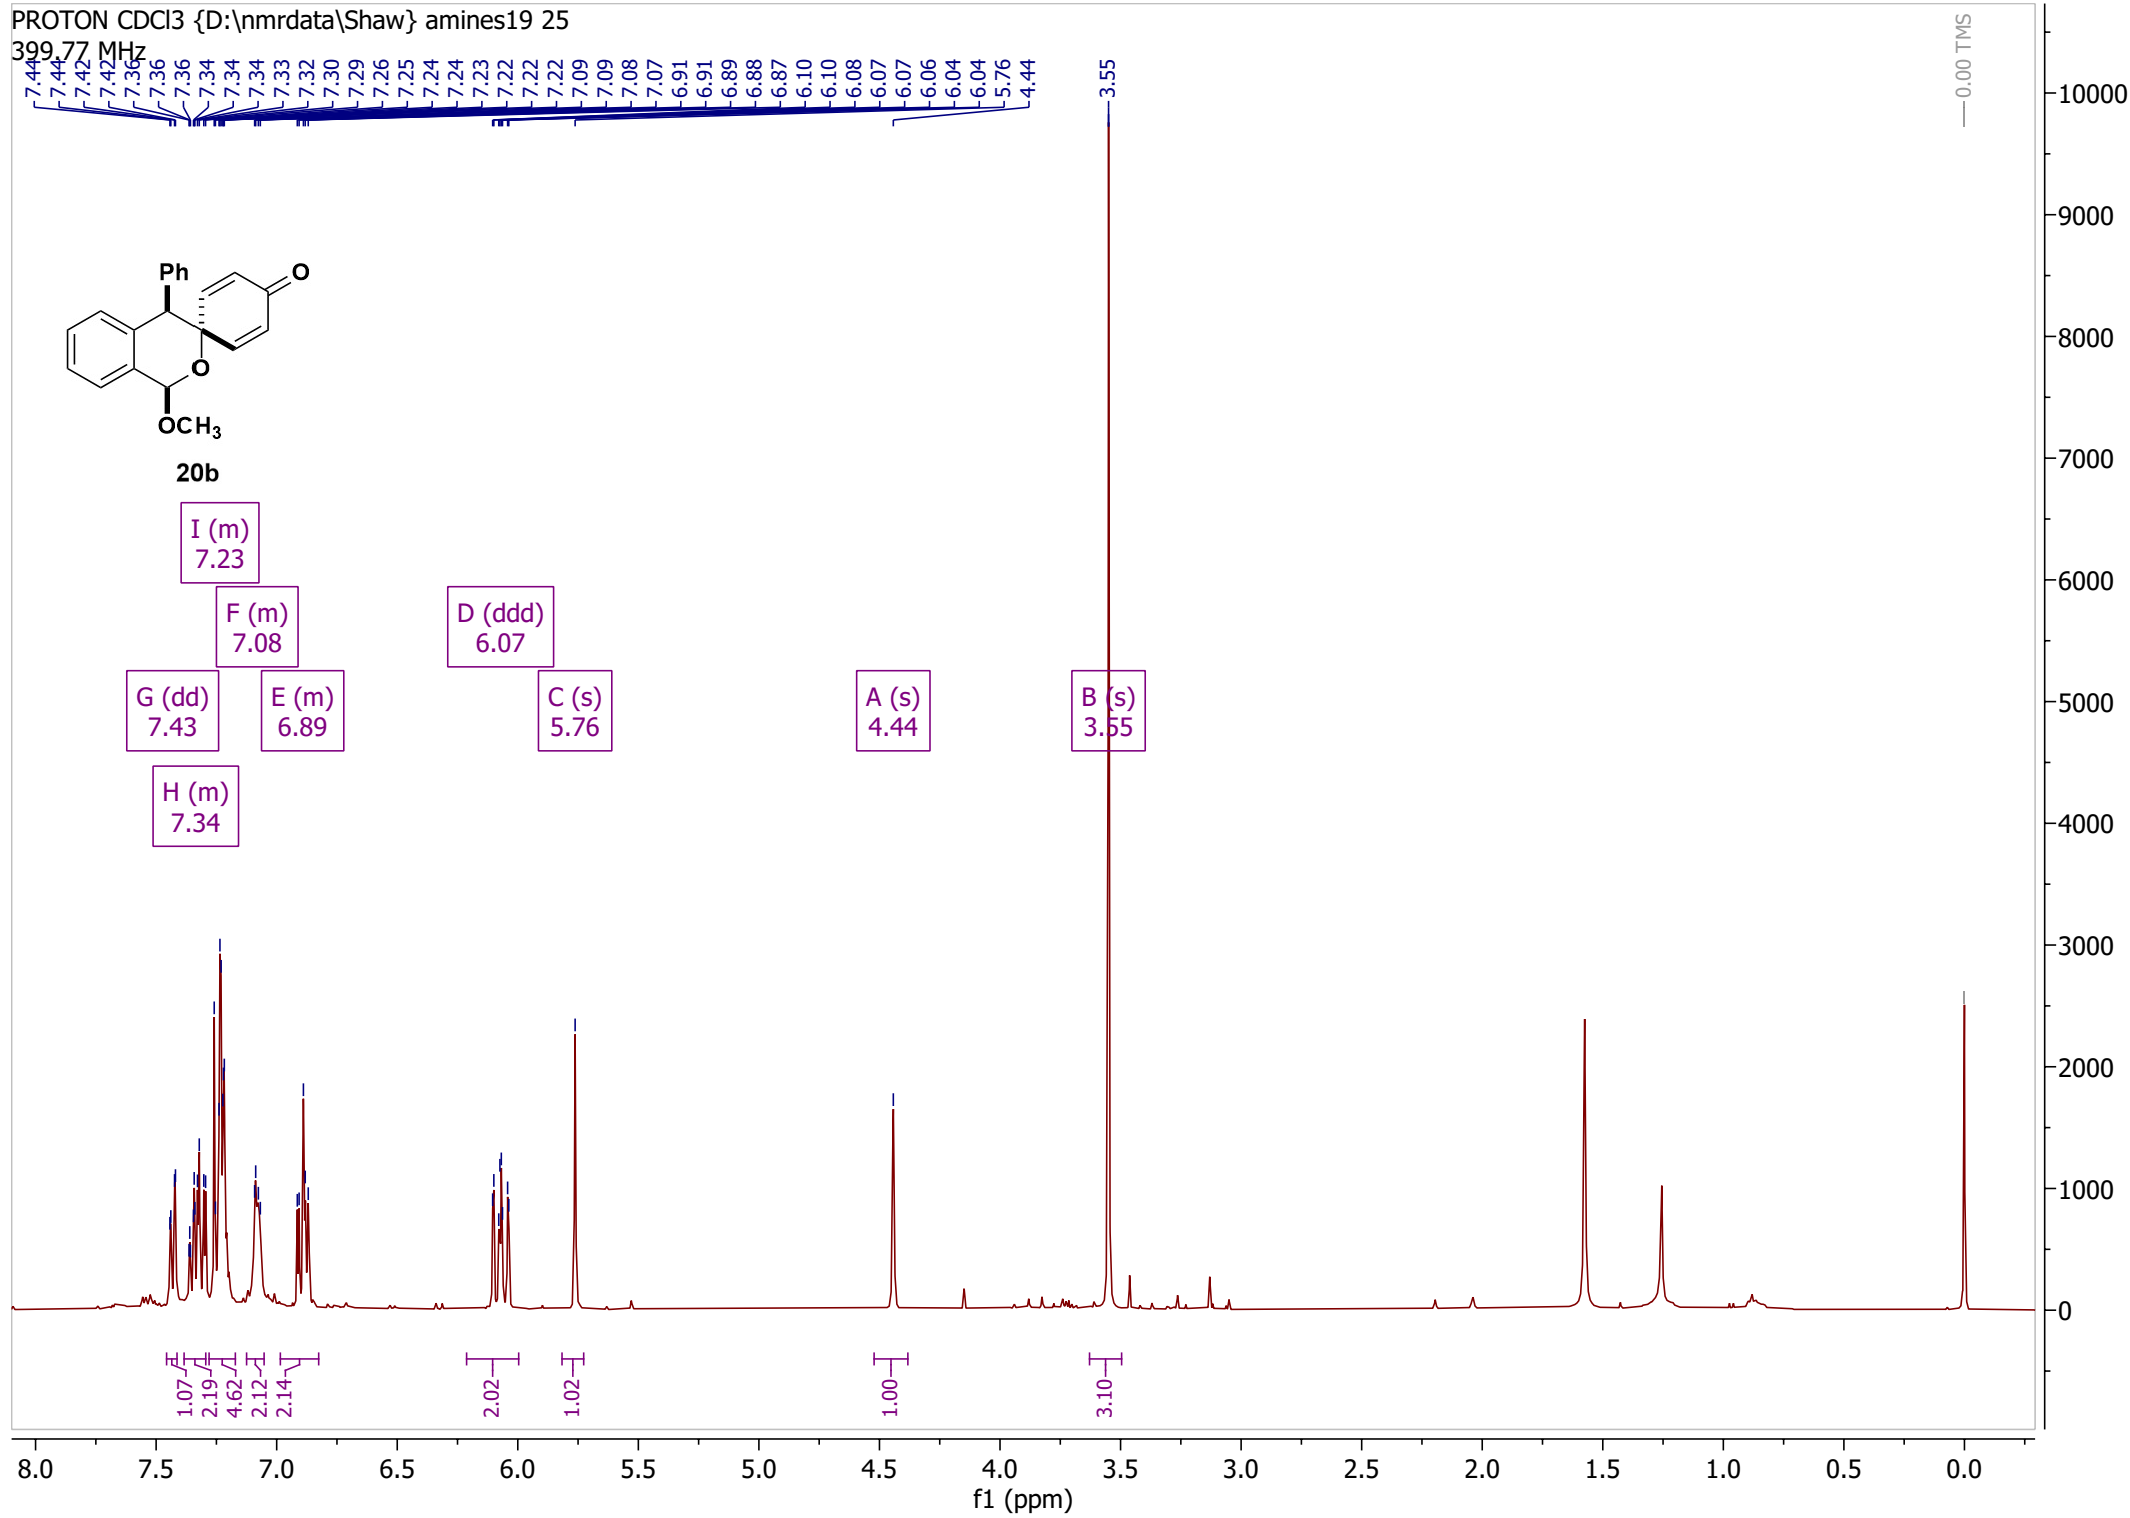

—0.00 TMS



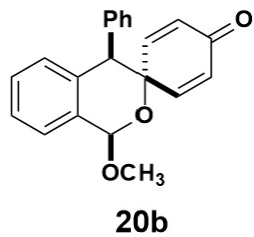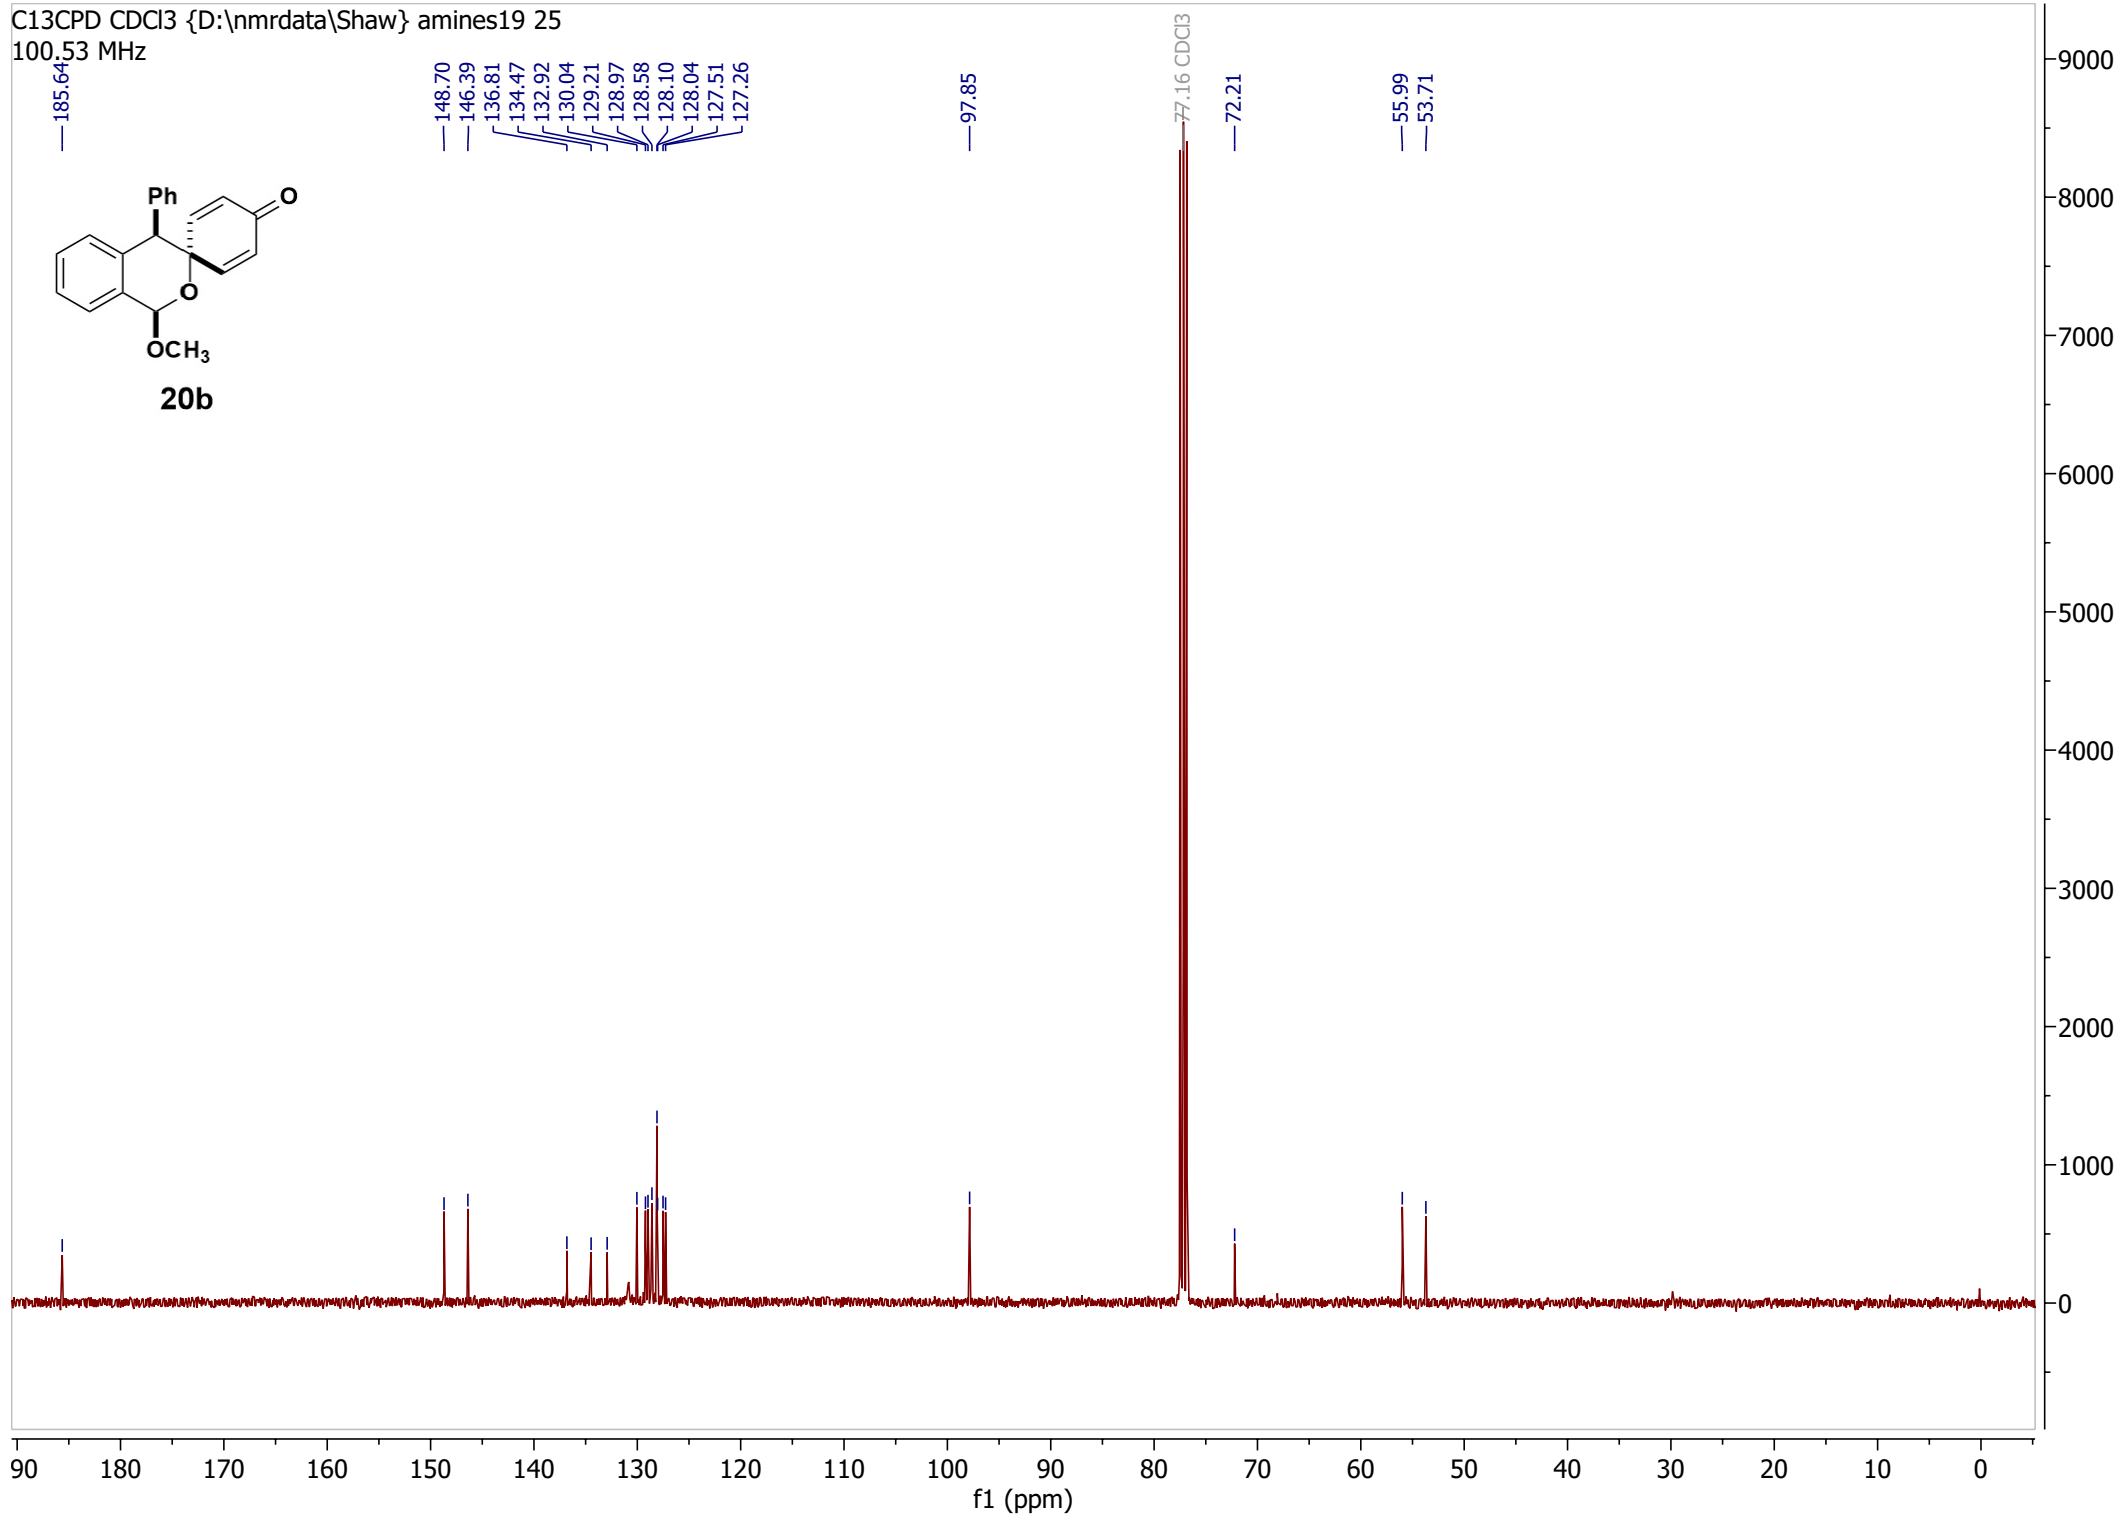

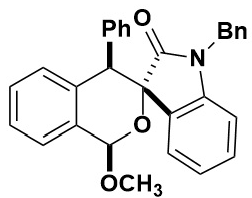

20c

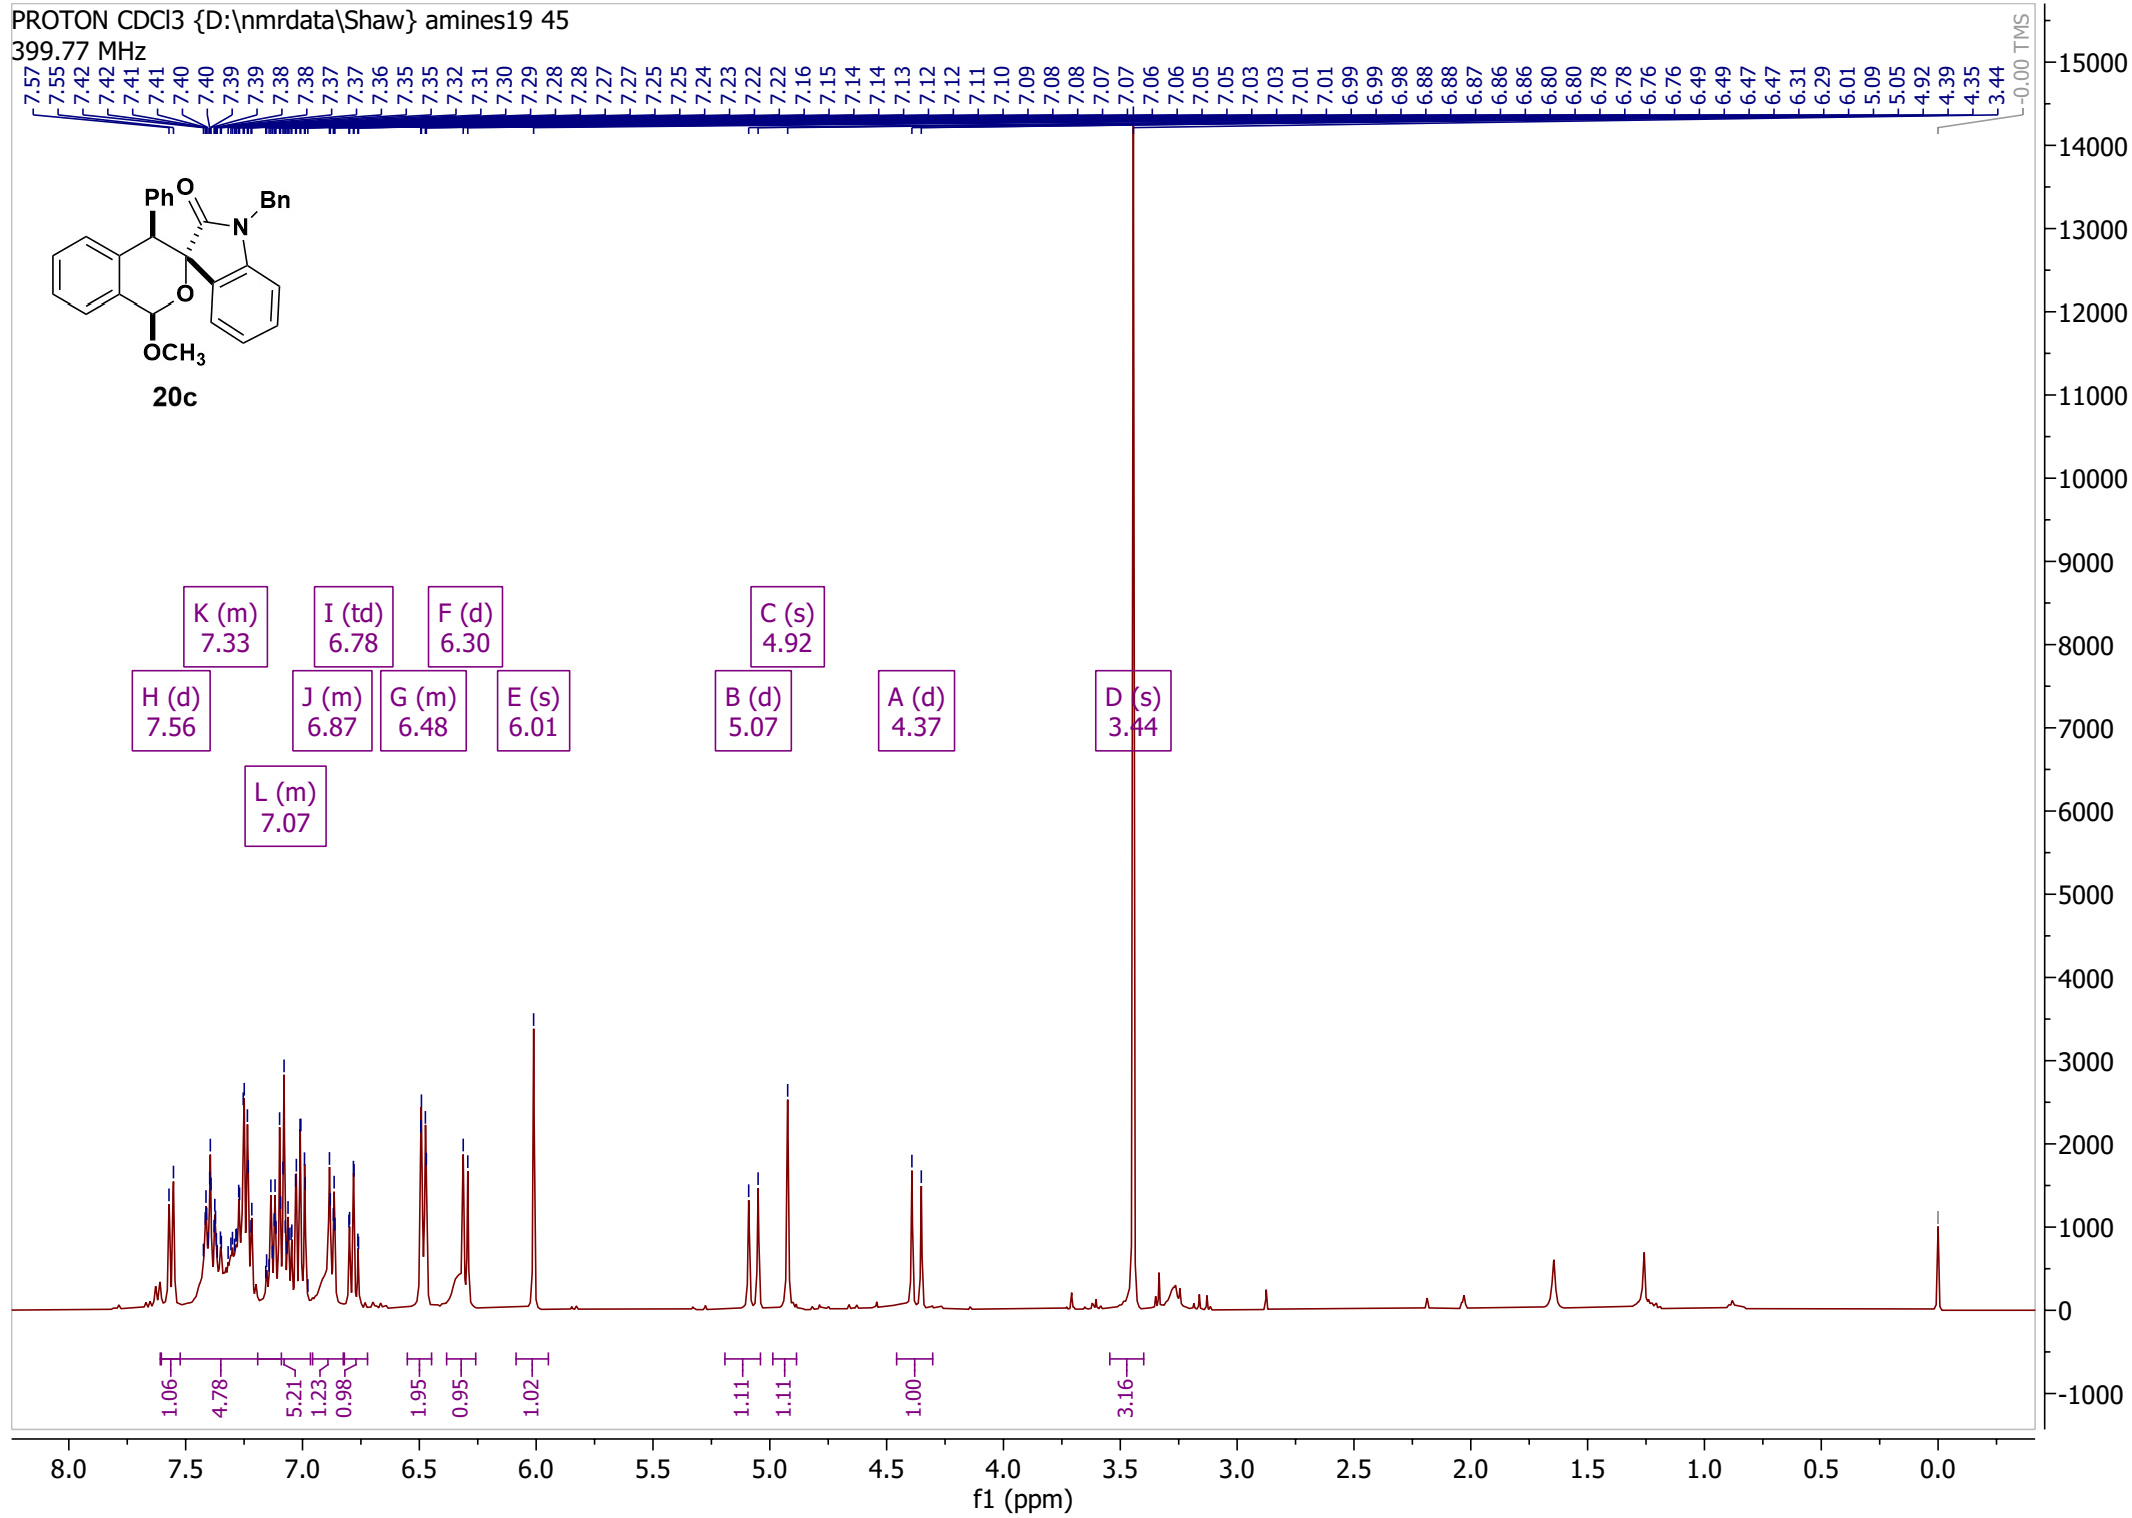

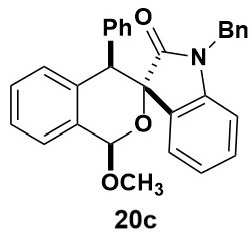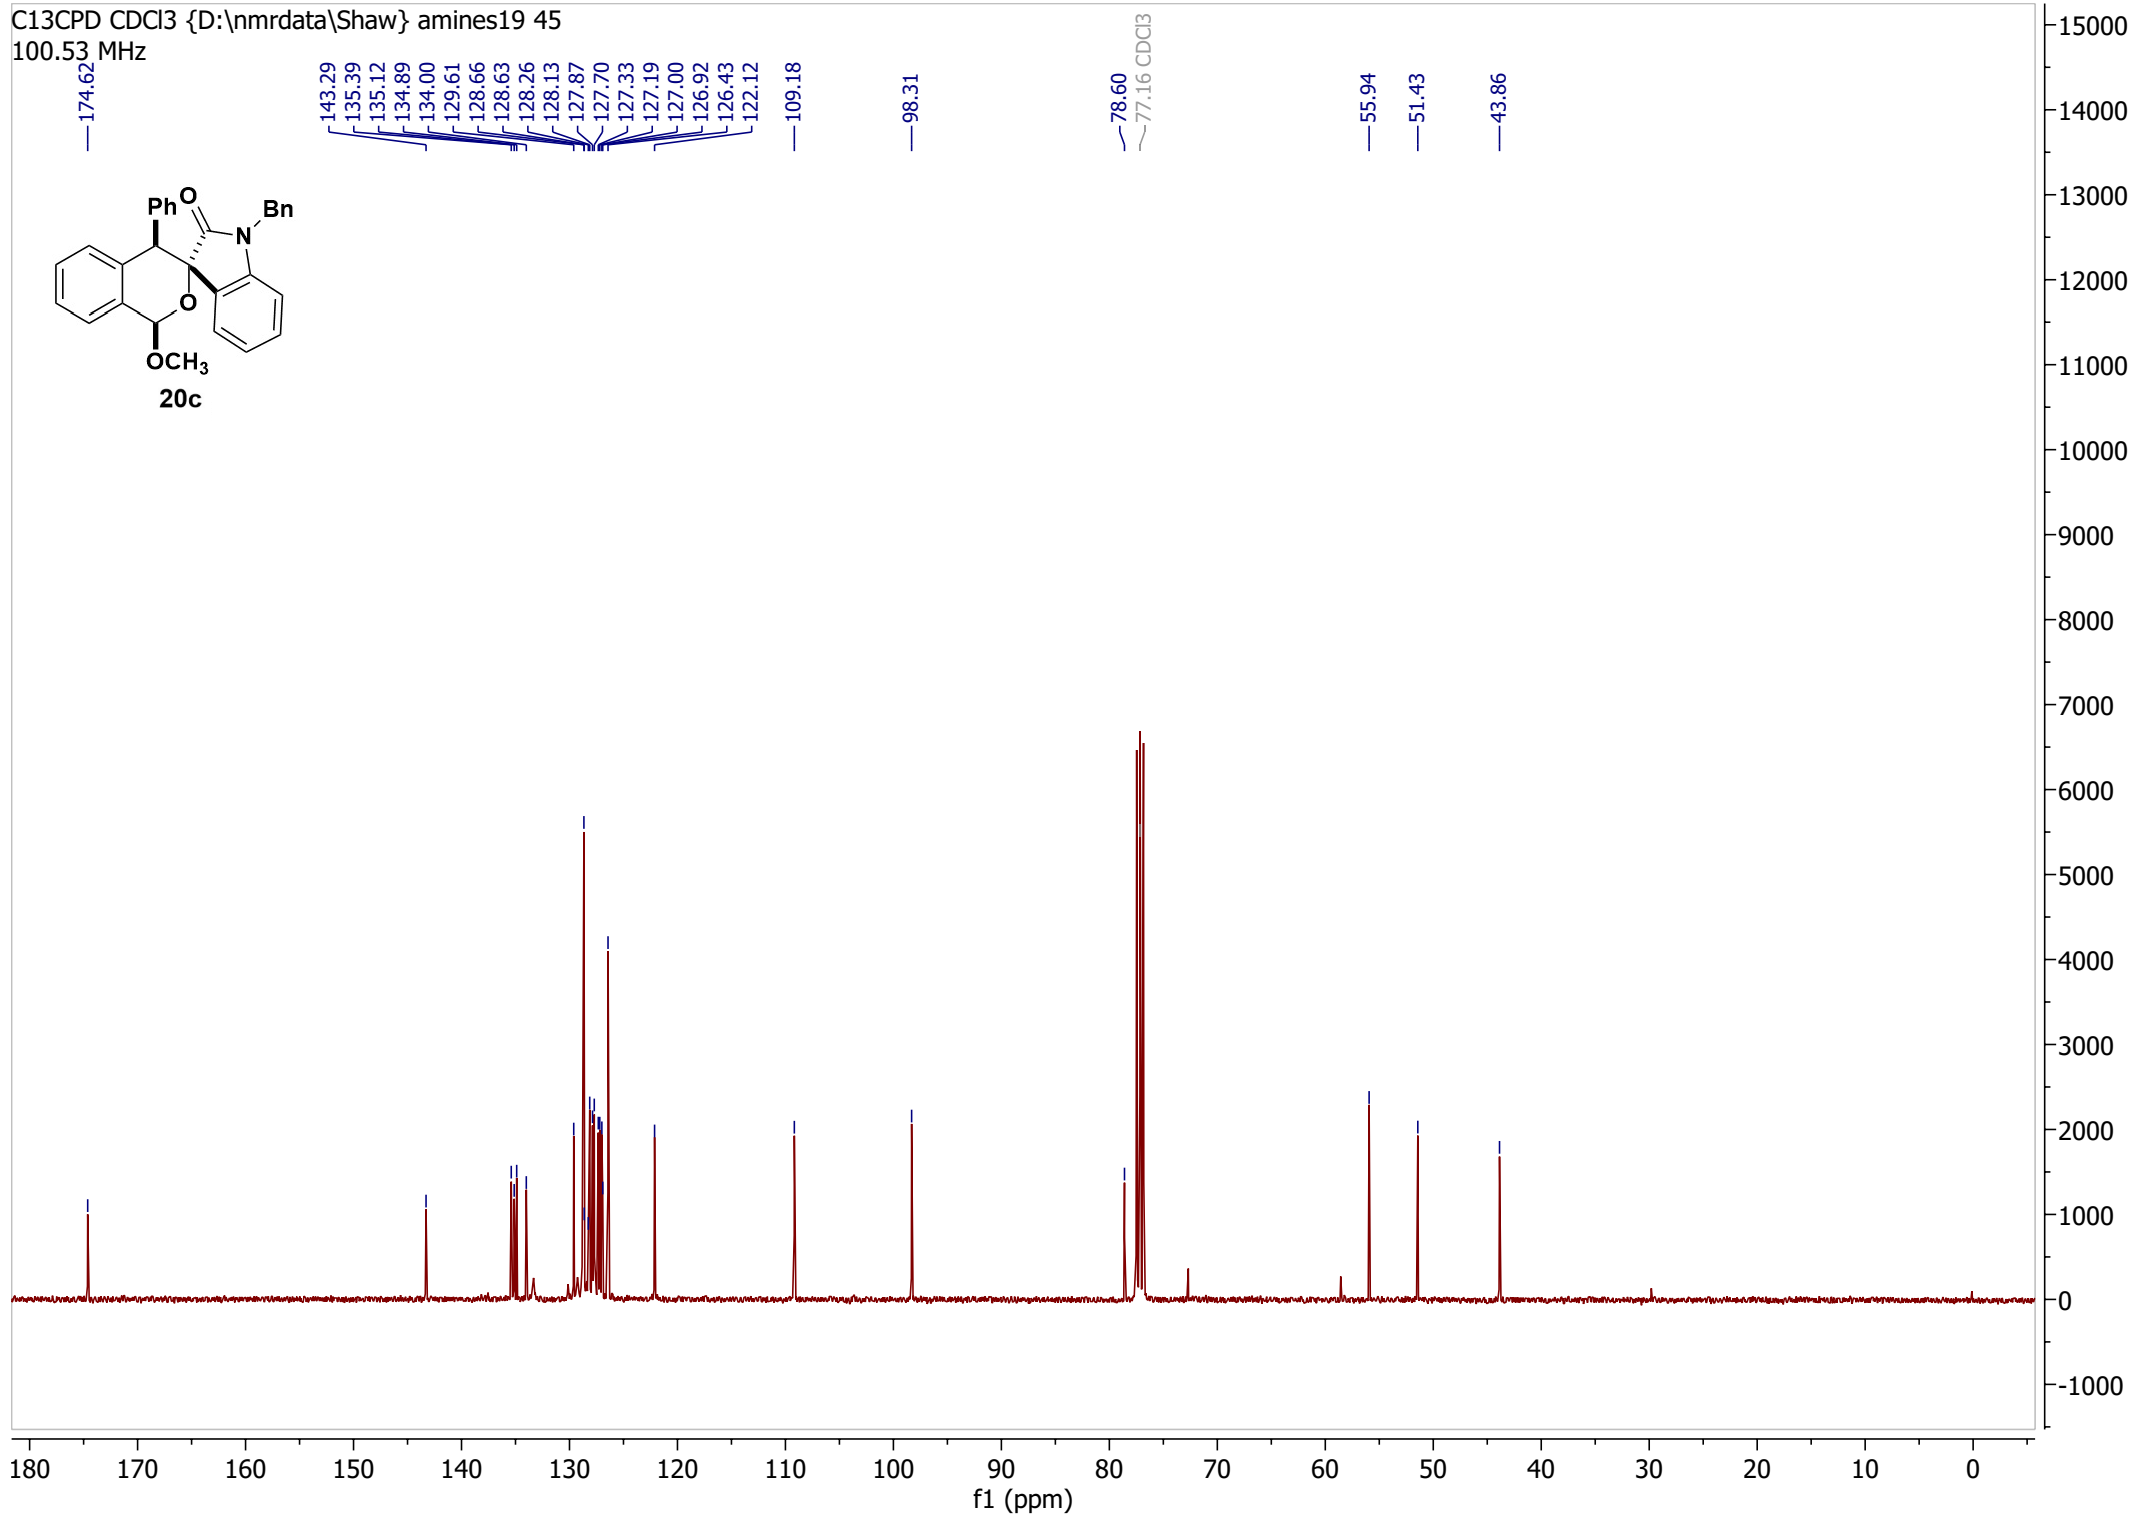

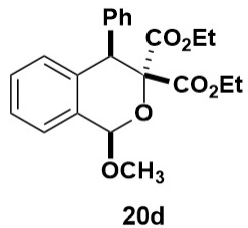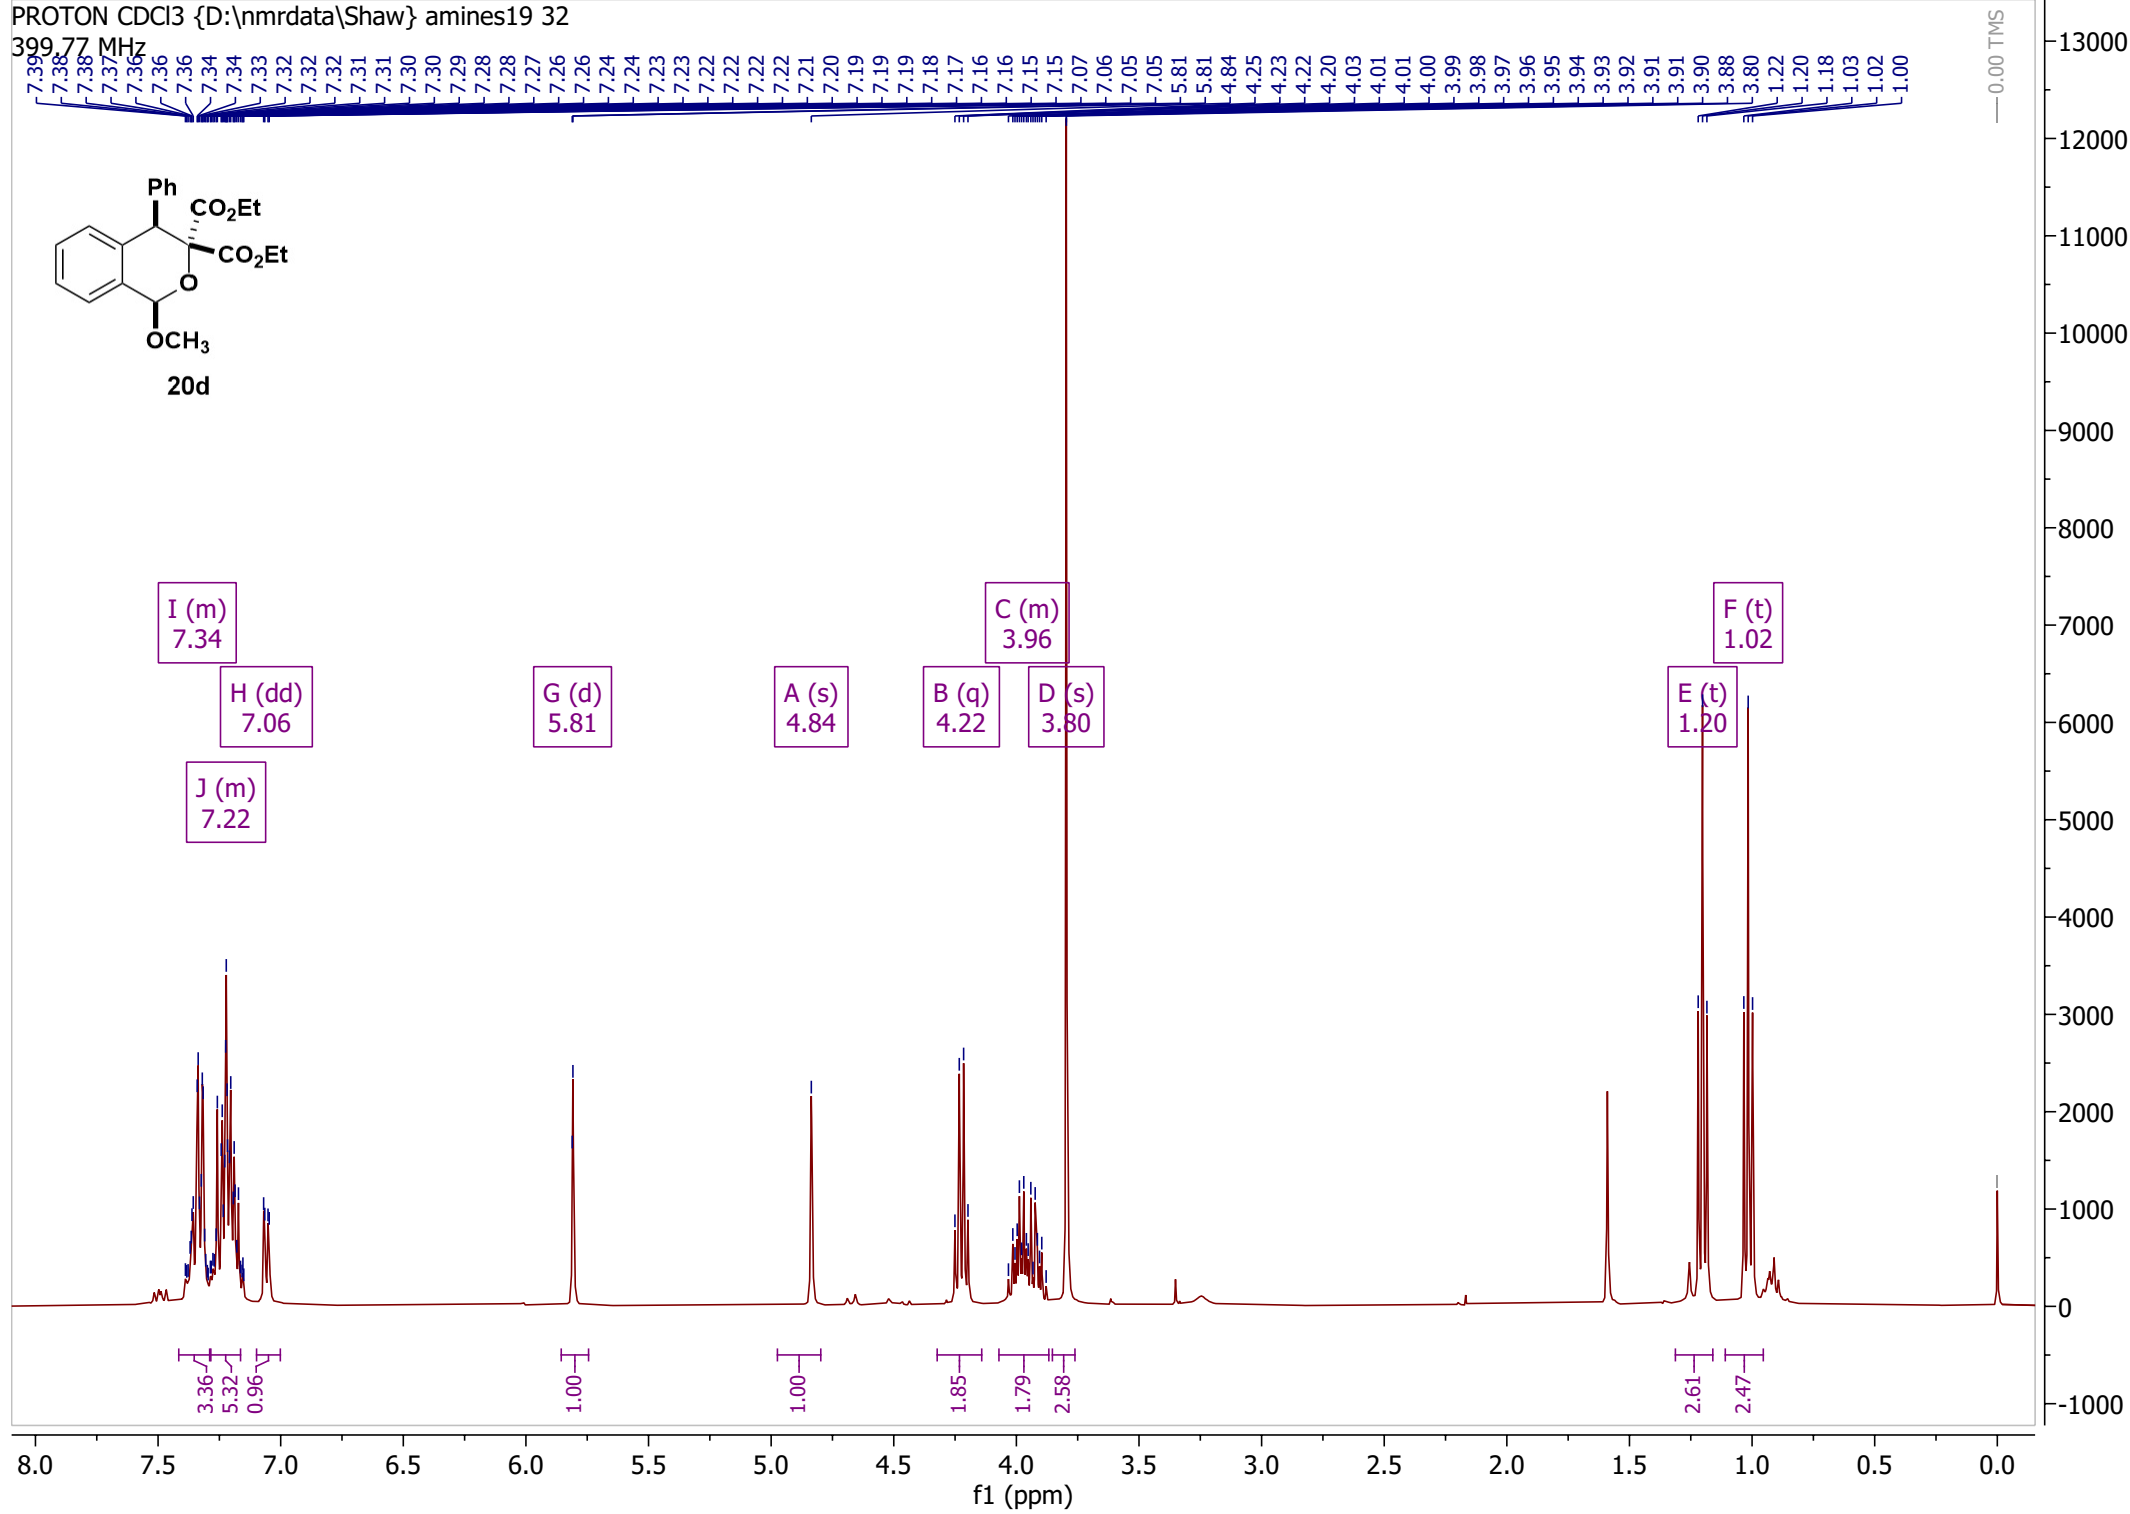

C13CPD CDCl3 {D:\nmrdata\Shaw} amines19 32

100.53 MHz

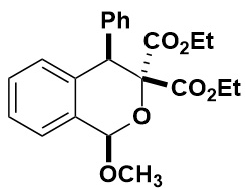

20d

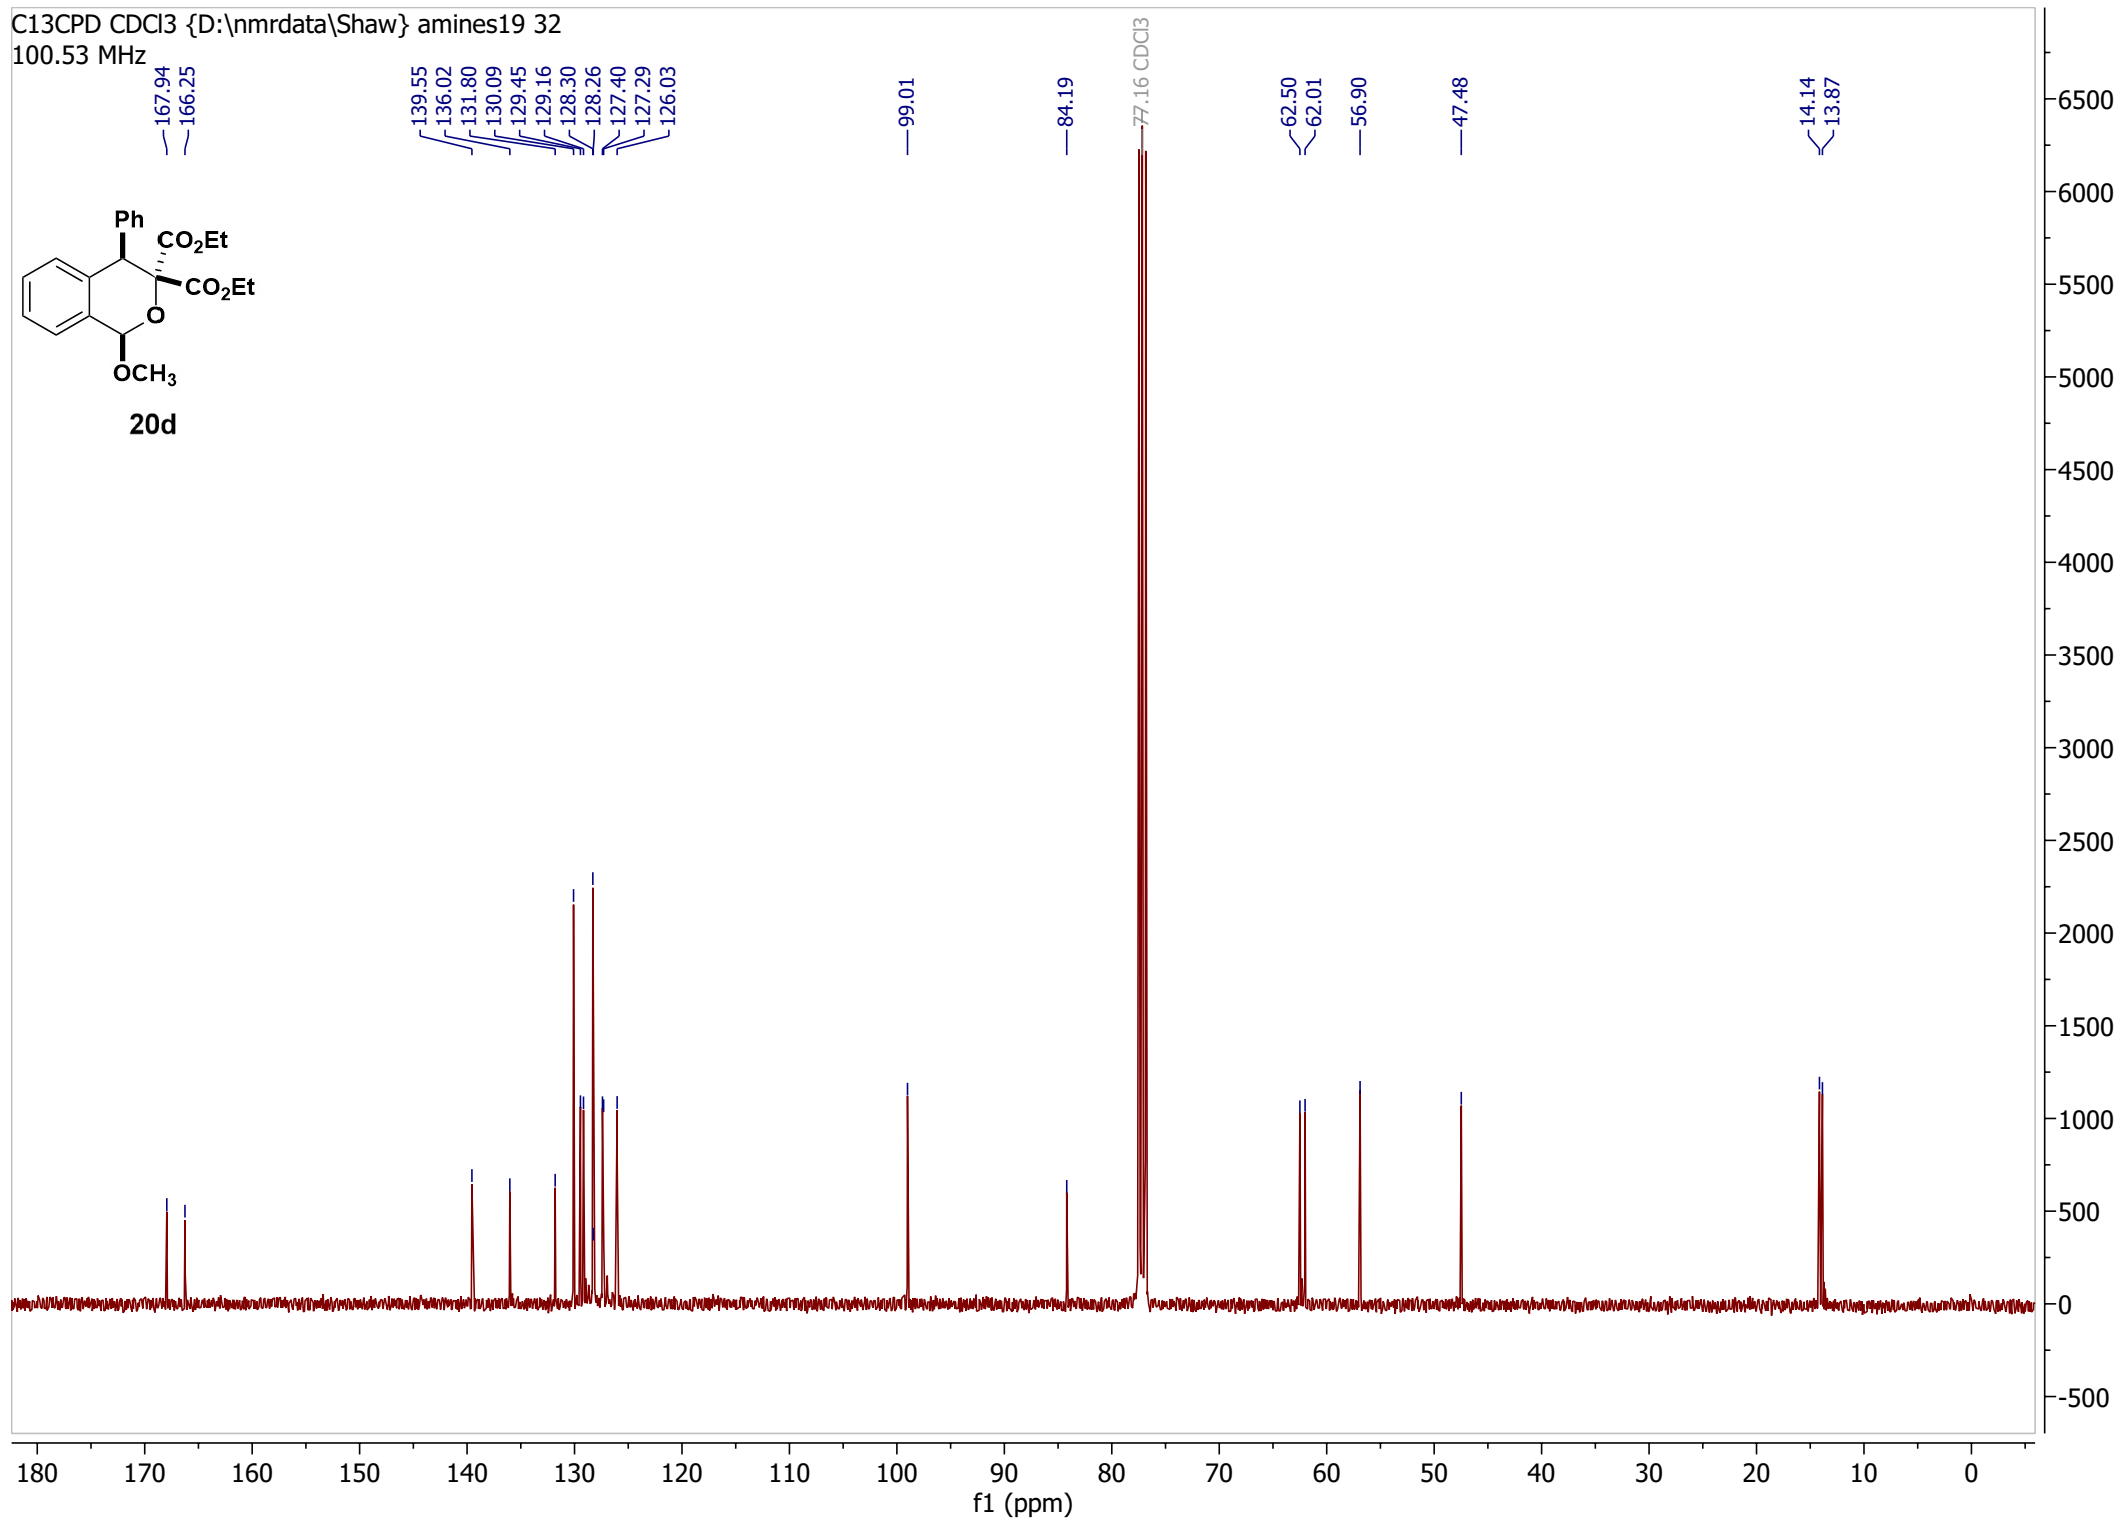

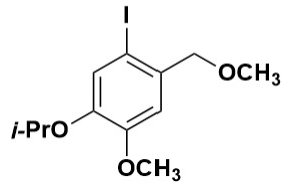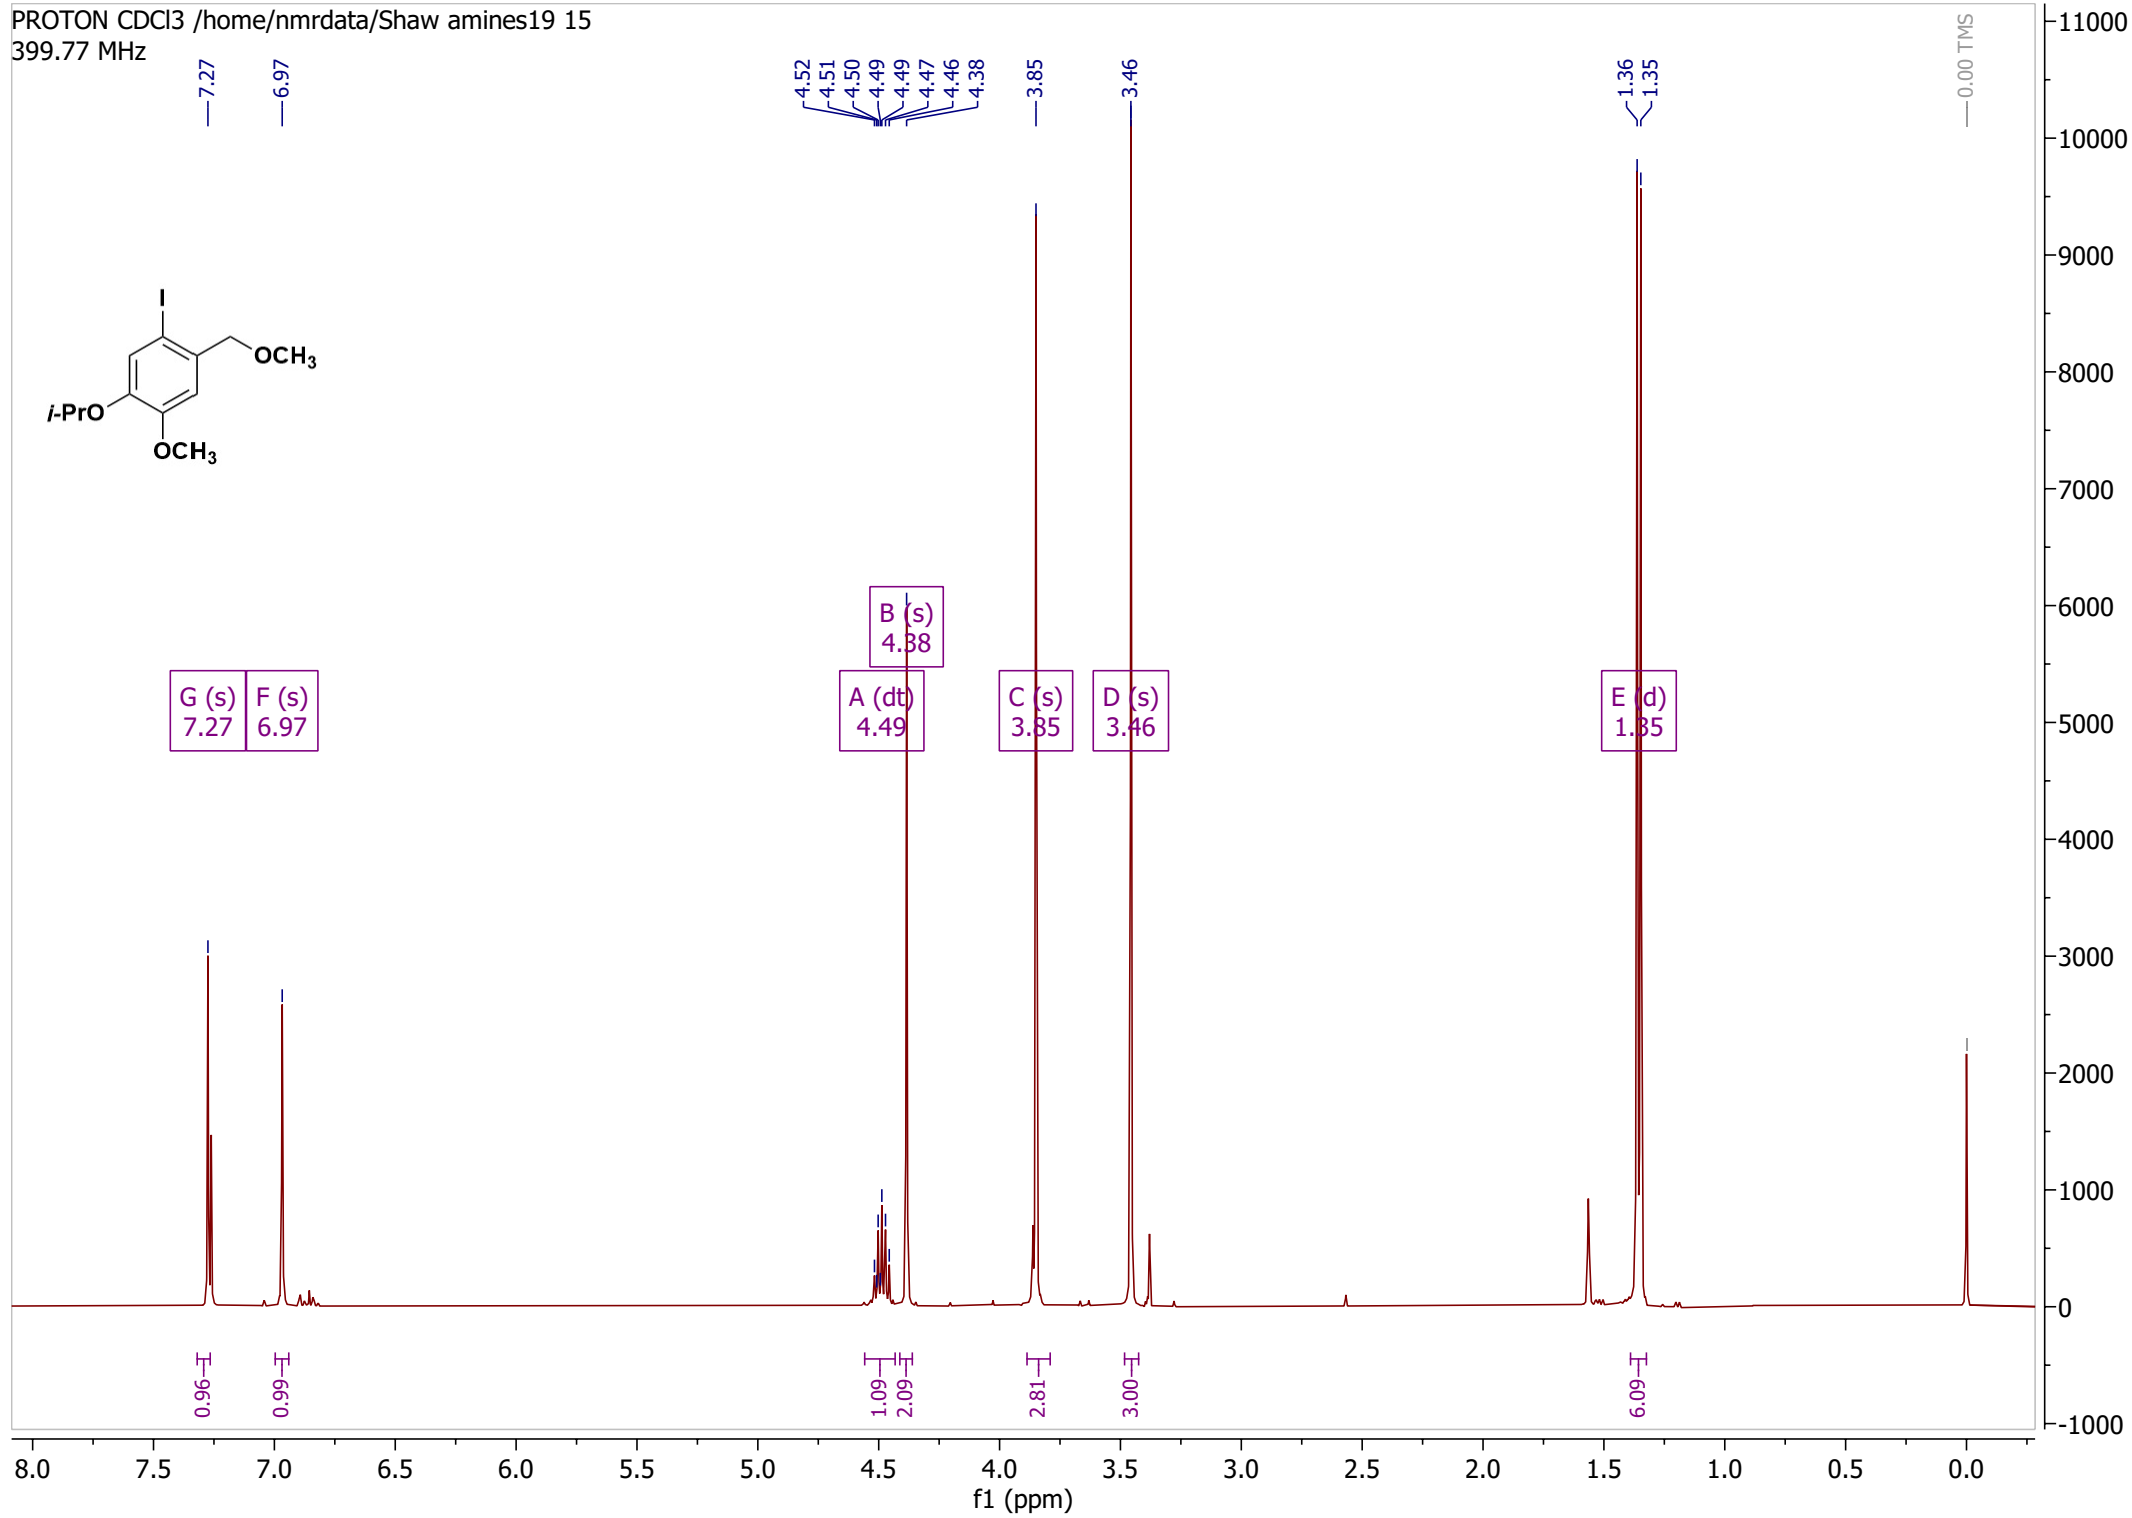

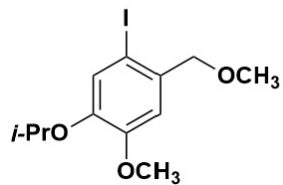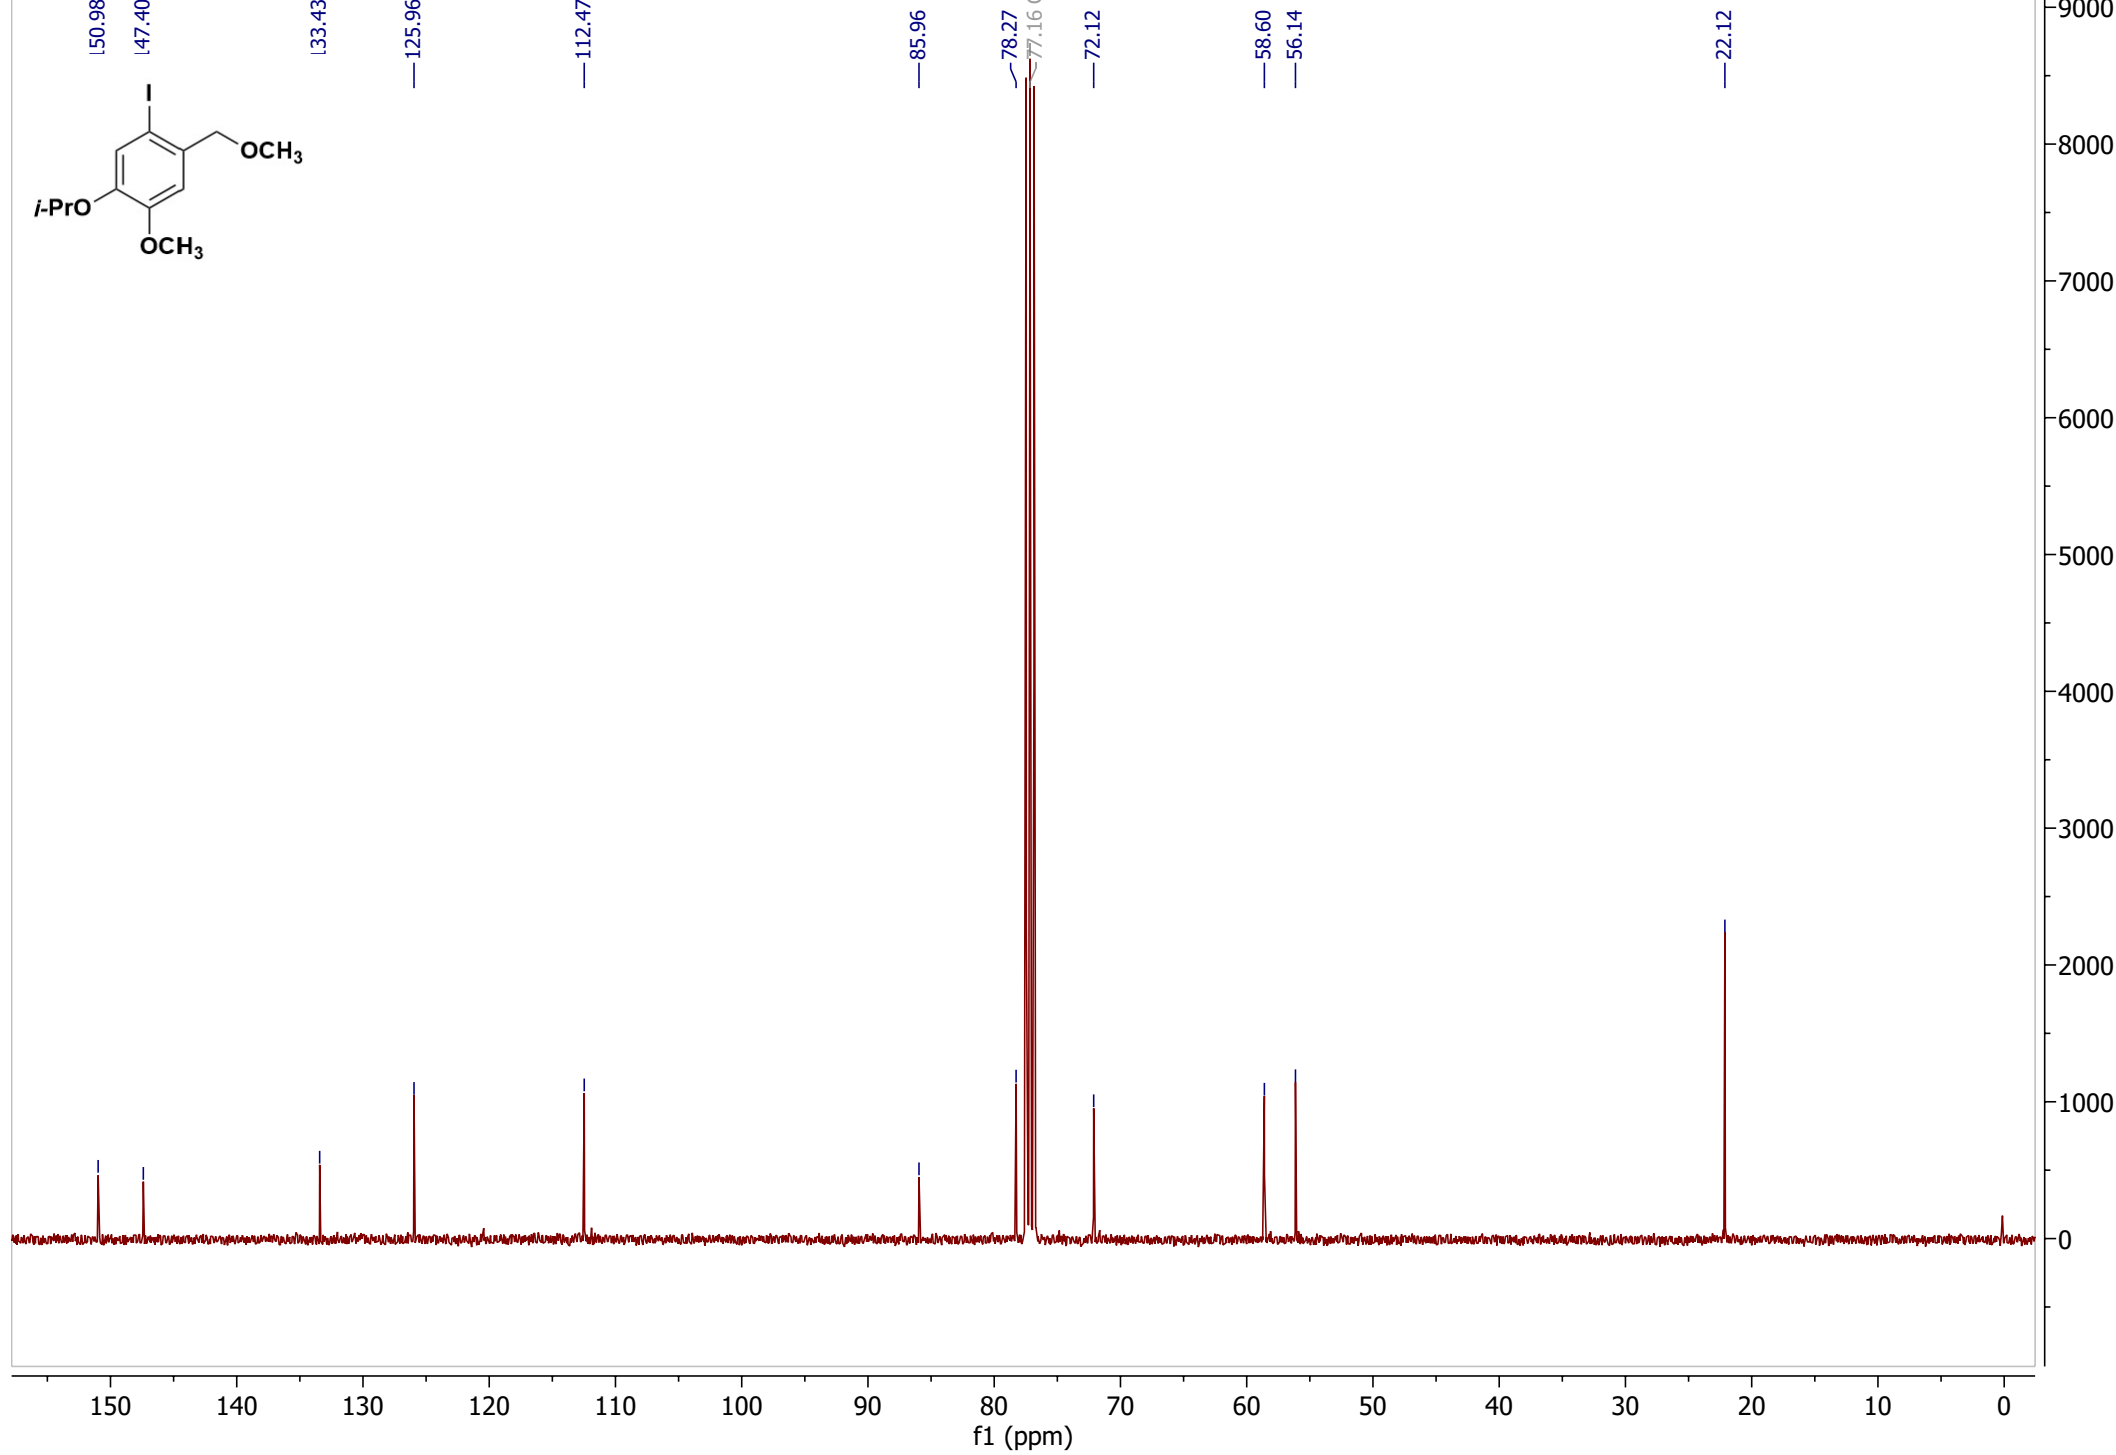

PROTON CDCl3 {D:\nmrdata\Shaw} amines19 12  
399.77 MHz

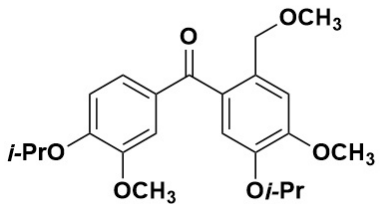

7.49  
7.48  
7.29  
7.28  
7.27  
7.26  
7.13  
6.95  
6.87  
6.85

4.68  
4.66  
4.65  
4.52  
4.48  
4.47  
4.45  
4.44  
4.42  
3.94  
3.90

3.32

1.43  
1.41  
1.34  
1.32

0.00 TMS

L (m) 7.28  
I (s) 6.95  
K (d) 7.48  
H (d) 6.86  
J (s) 7.13

B (s) 4.52  
A (m) 4.66  
M (p) 4.45  
D (s) 3.90  
E (s) 3.94

C (s) 3.32

G (d) 1.42  
F (d) 1.33

0.96  
1.66  
0.99  
0.96

0.78  
2.03  
0.80

3.03  
2.90

3.00

6.11  
5.86

8.0 7.5 7.0 6.5 6.0 5.5 5.0 4.5 4.0 3.5 3.0 2.5 2.0 1.5 1.0 0.5 0.0 -0.5  
f1 (ppm)

6000  
5500  
5000  
4500  
4000  
3500  
3000  
2500  
2000  
1500  
1000  
500  
0  
-500



C13CPD CDCl3 {D:\nmrdata\Shaw} amines19 12  
100.53 MHz

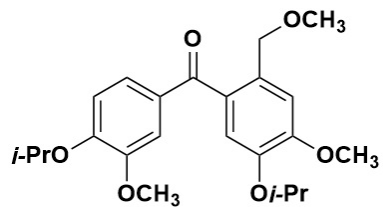

195.91

152.44  
151.95  
149.92  
145.26

132.61  
130.91  
129.97  
125.57

117.44  
112.67  
112.41  
111.79

71.96  
71.91  
71.38

58.54  
56.19

22.16  
22.08

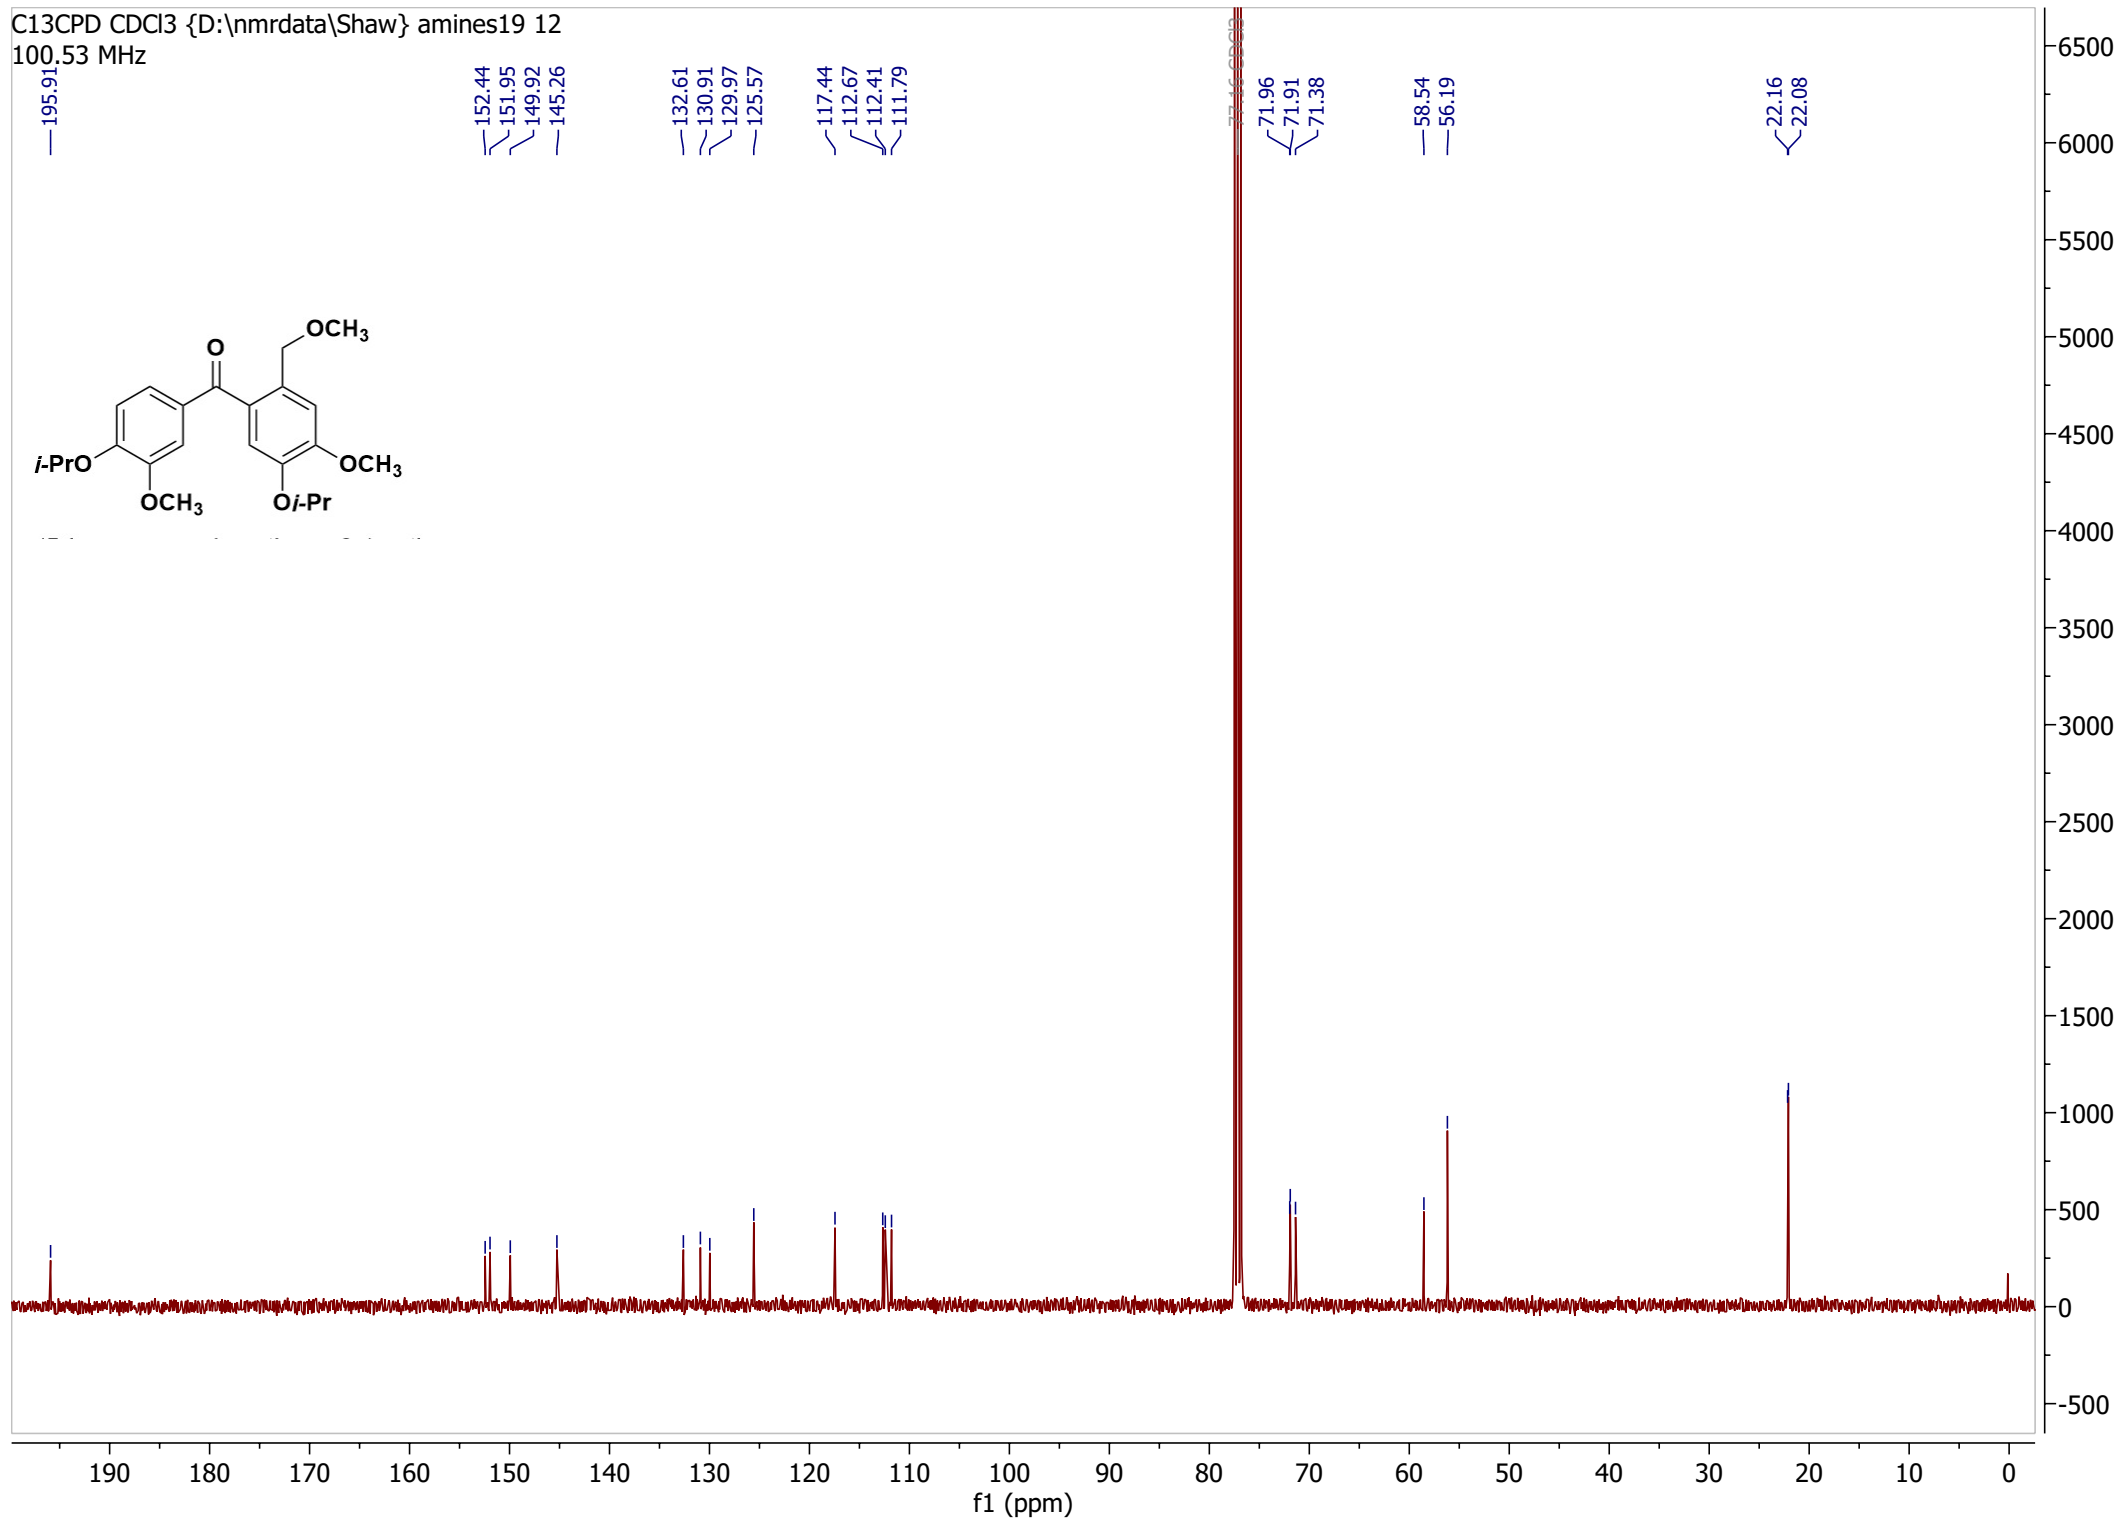

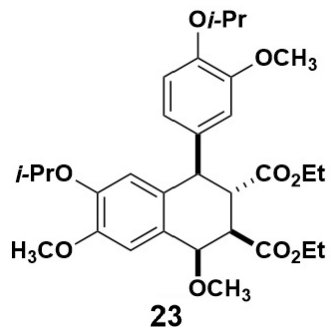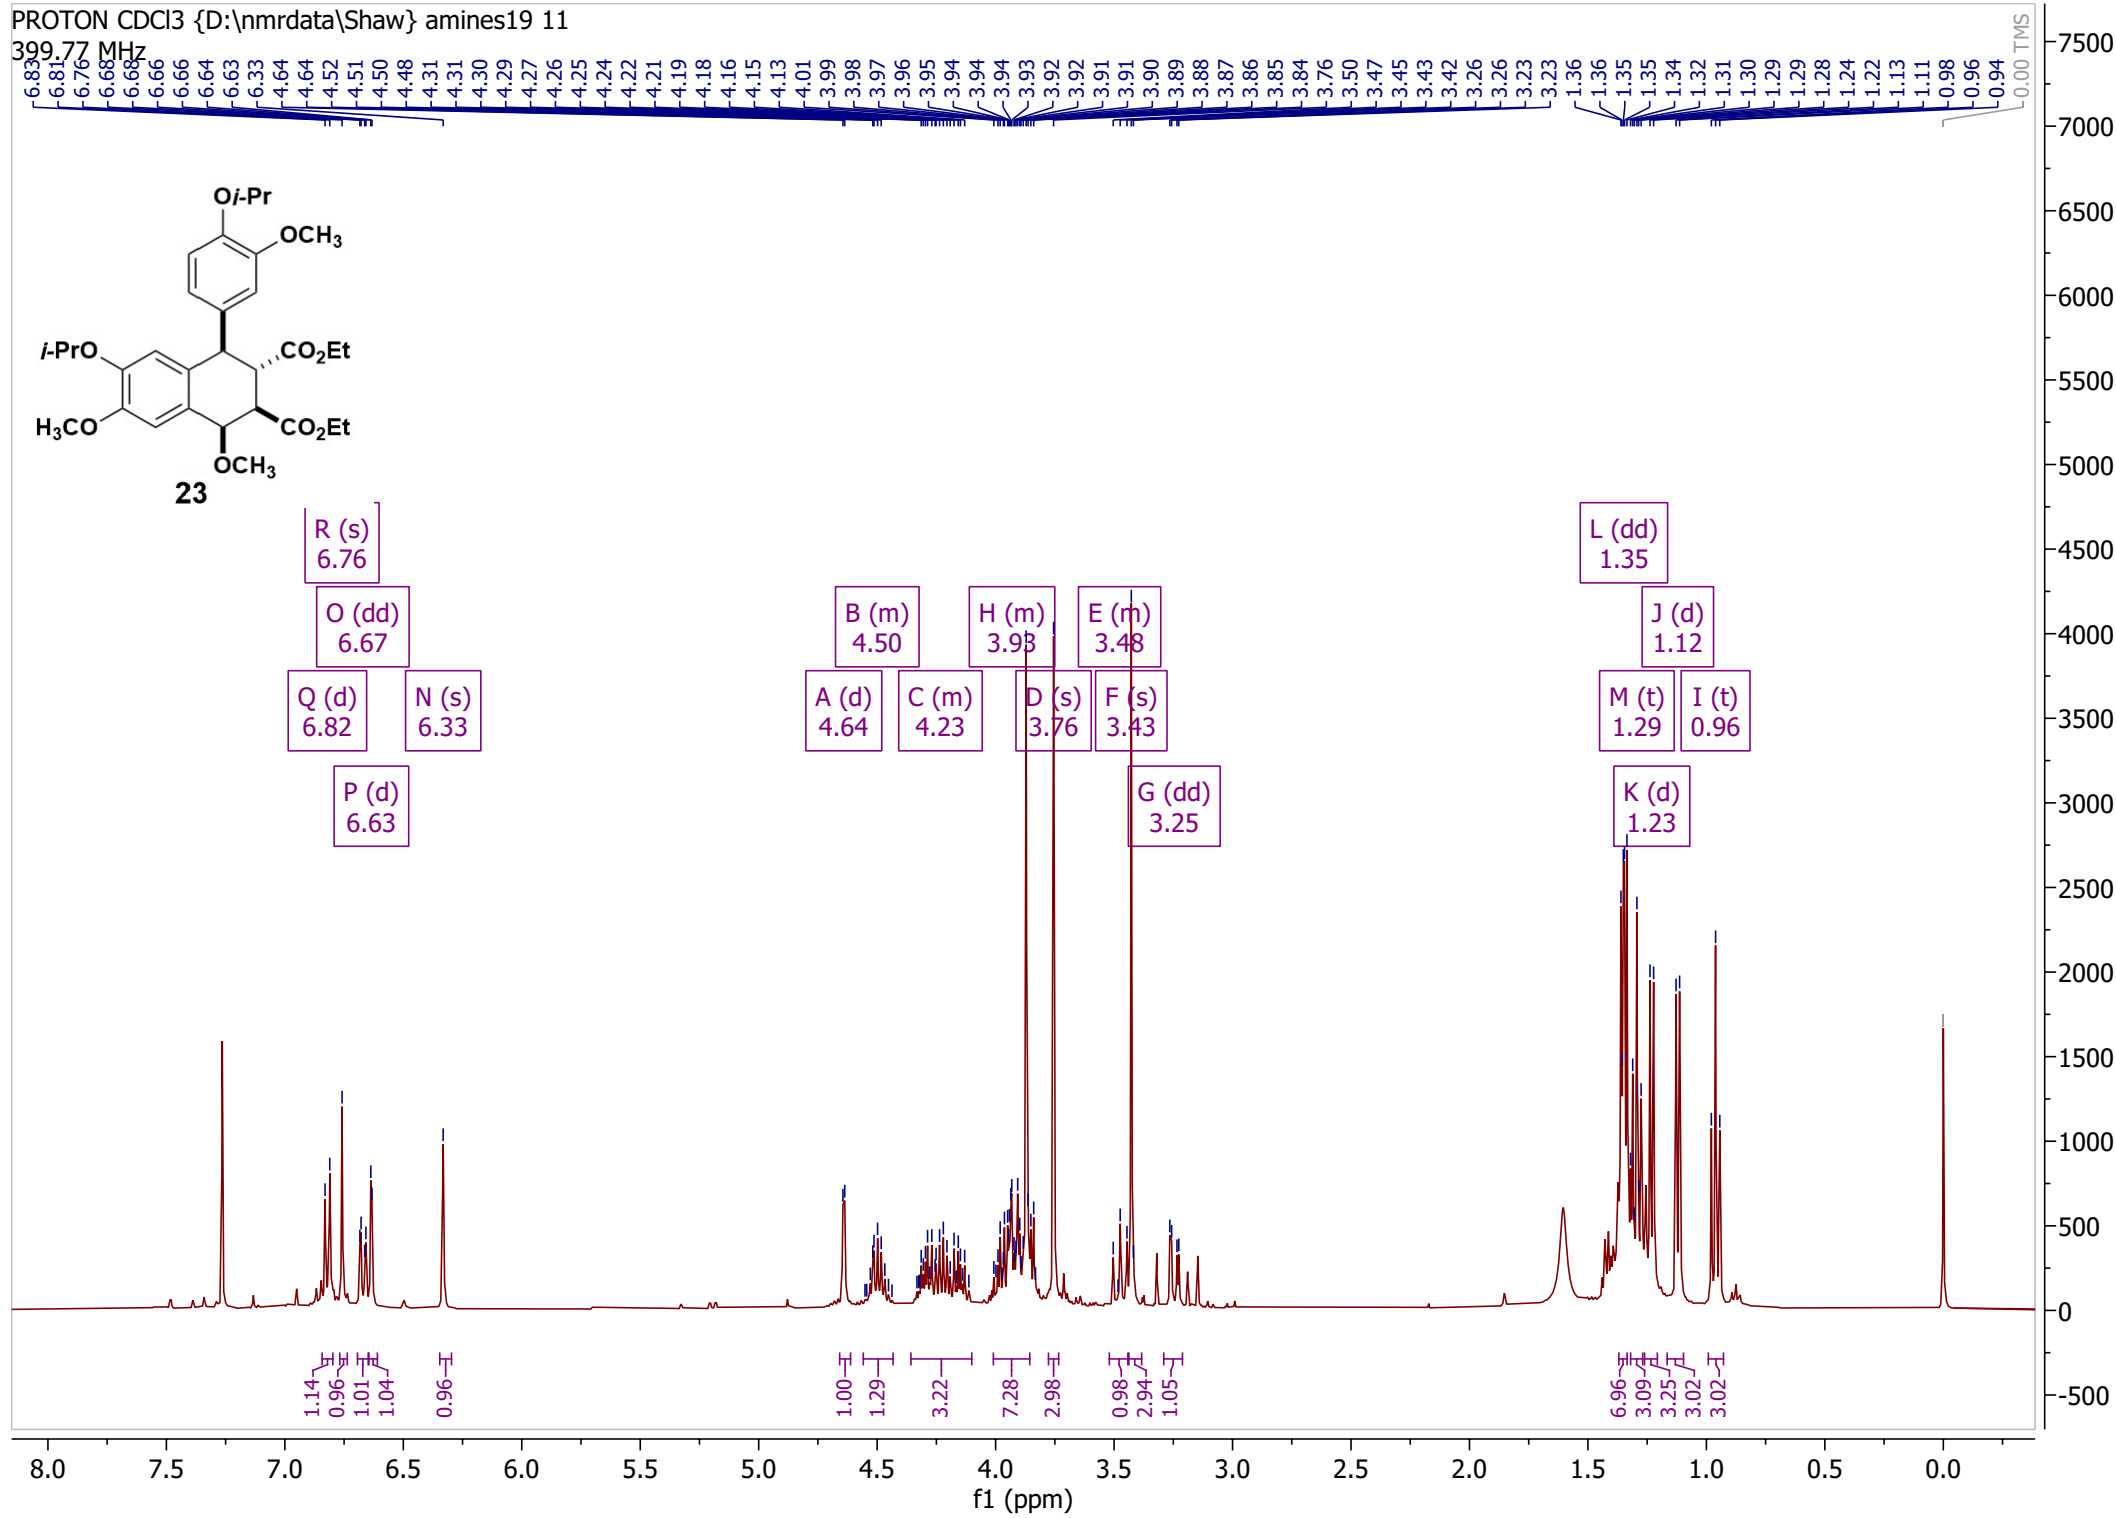

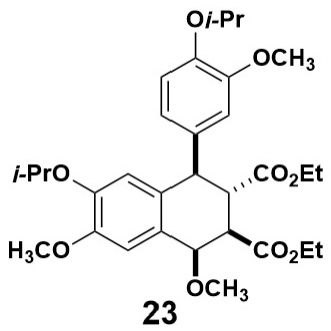**23**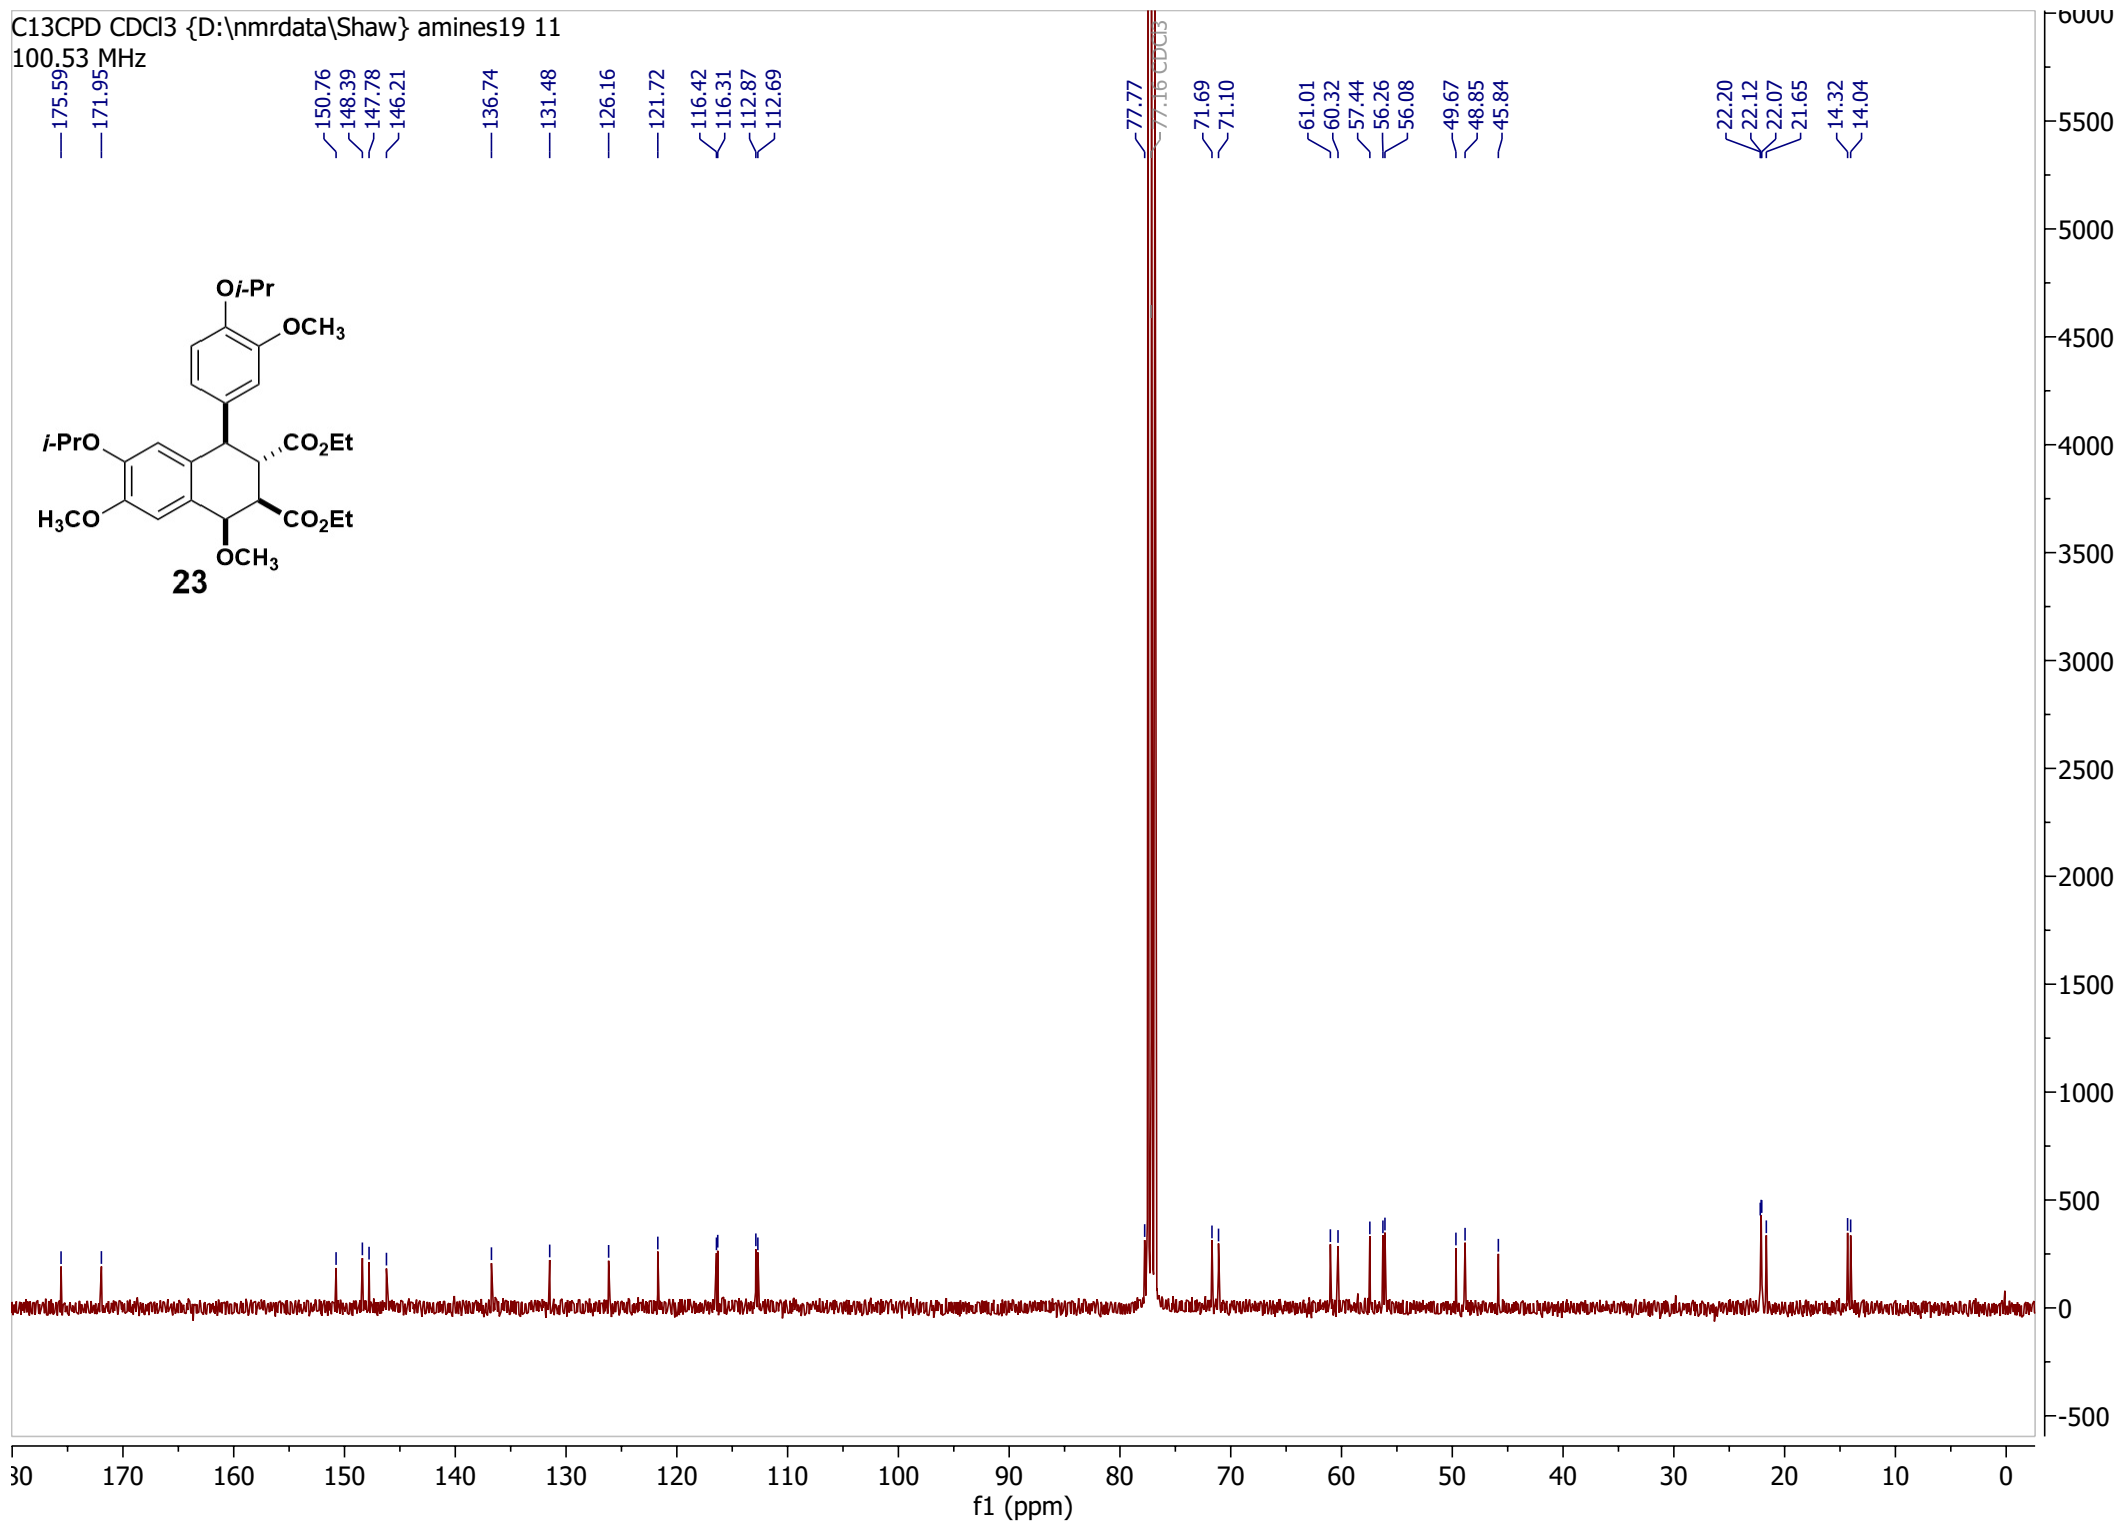

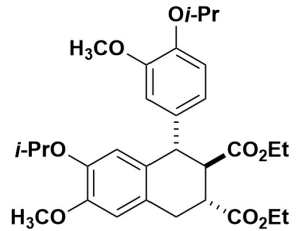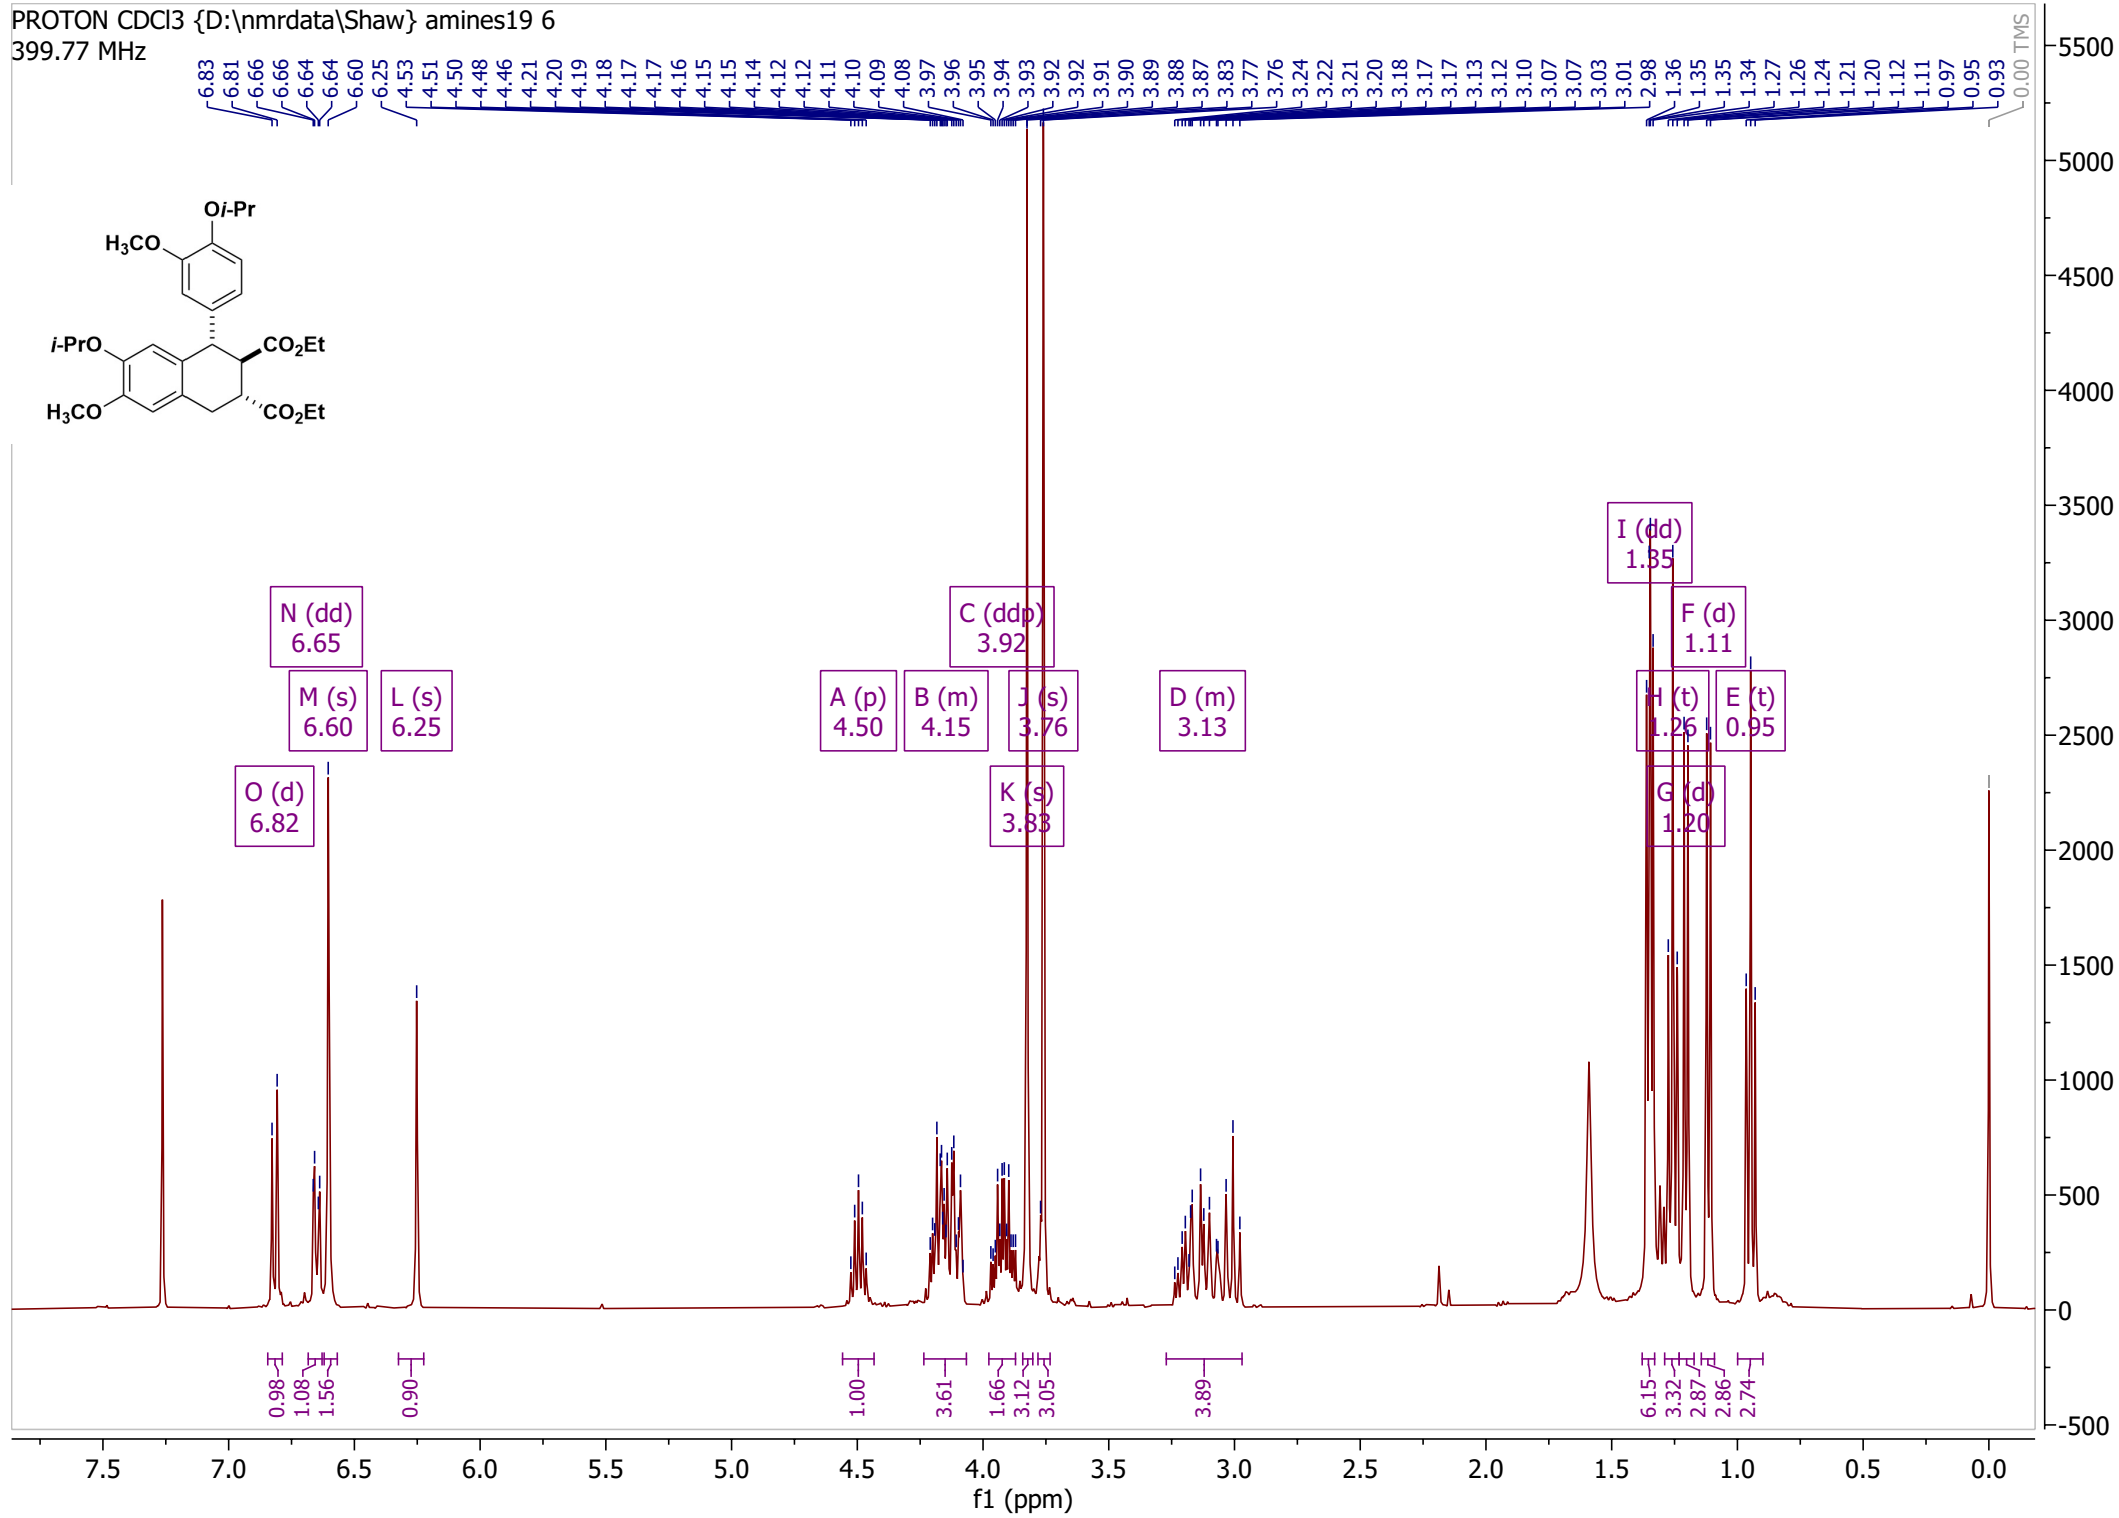

C13CPD CDCl3 {D:\nmrdata\Shaw} amines19 6

100.53 MHz

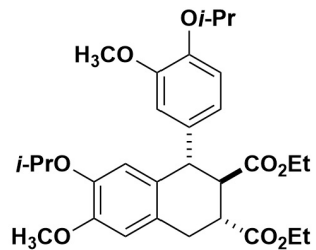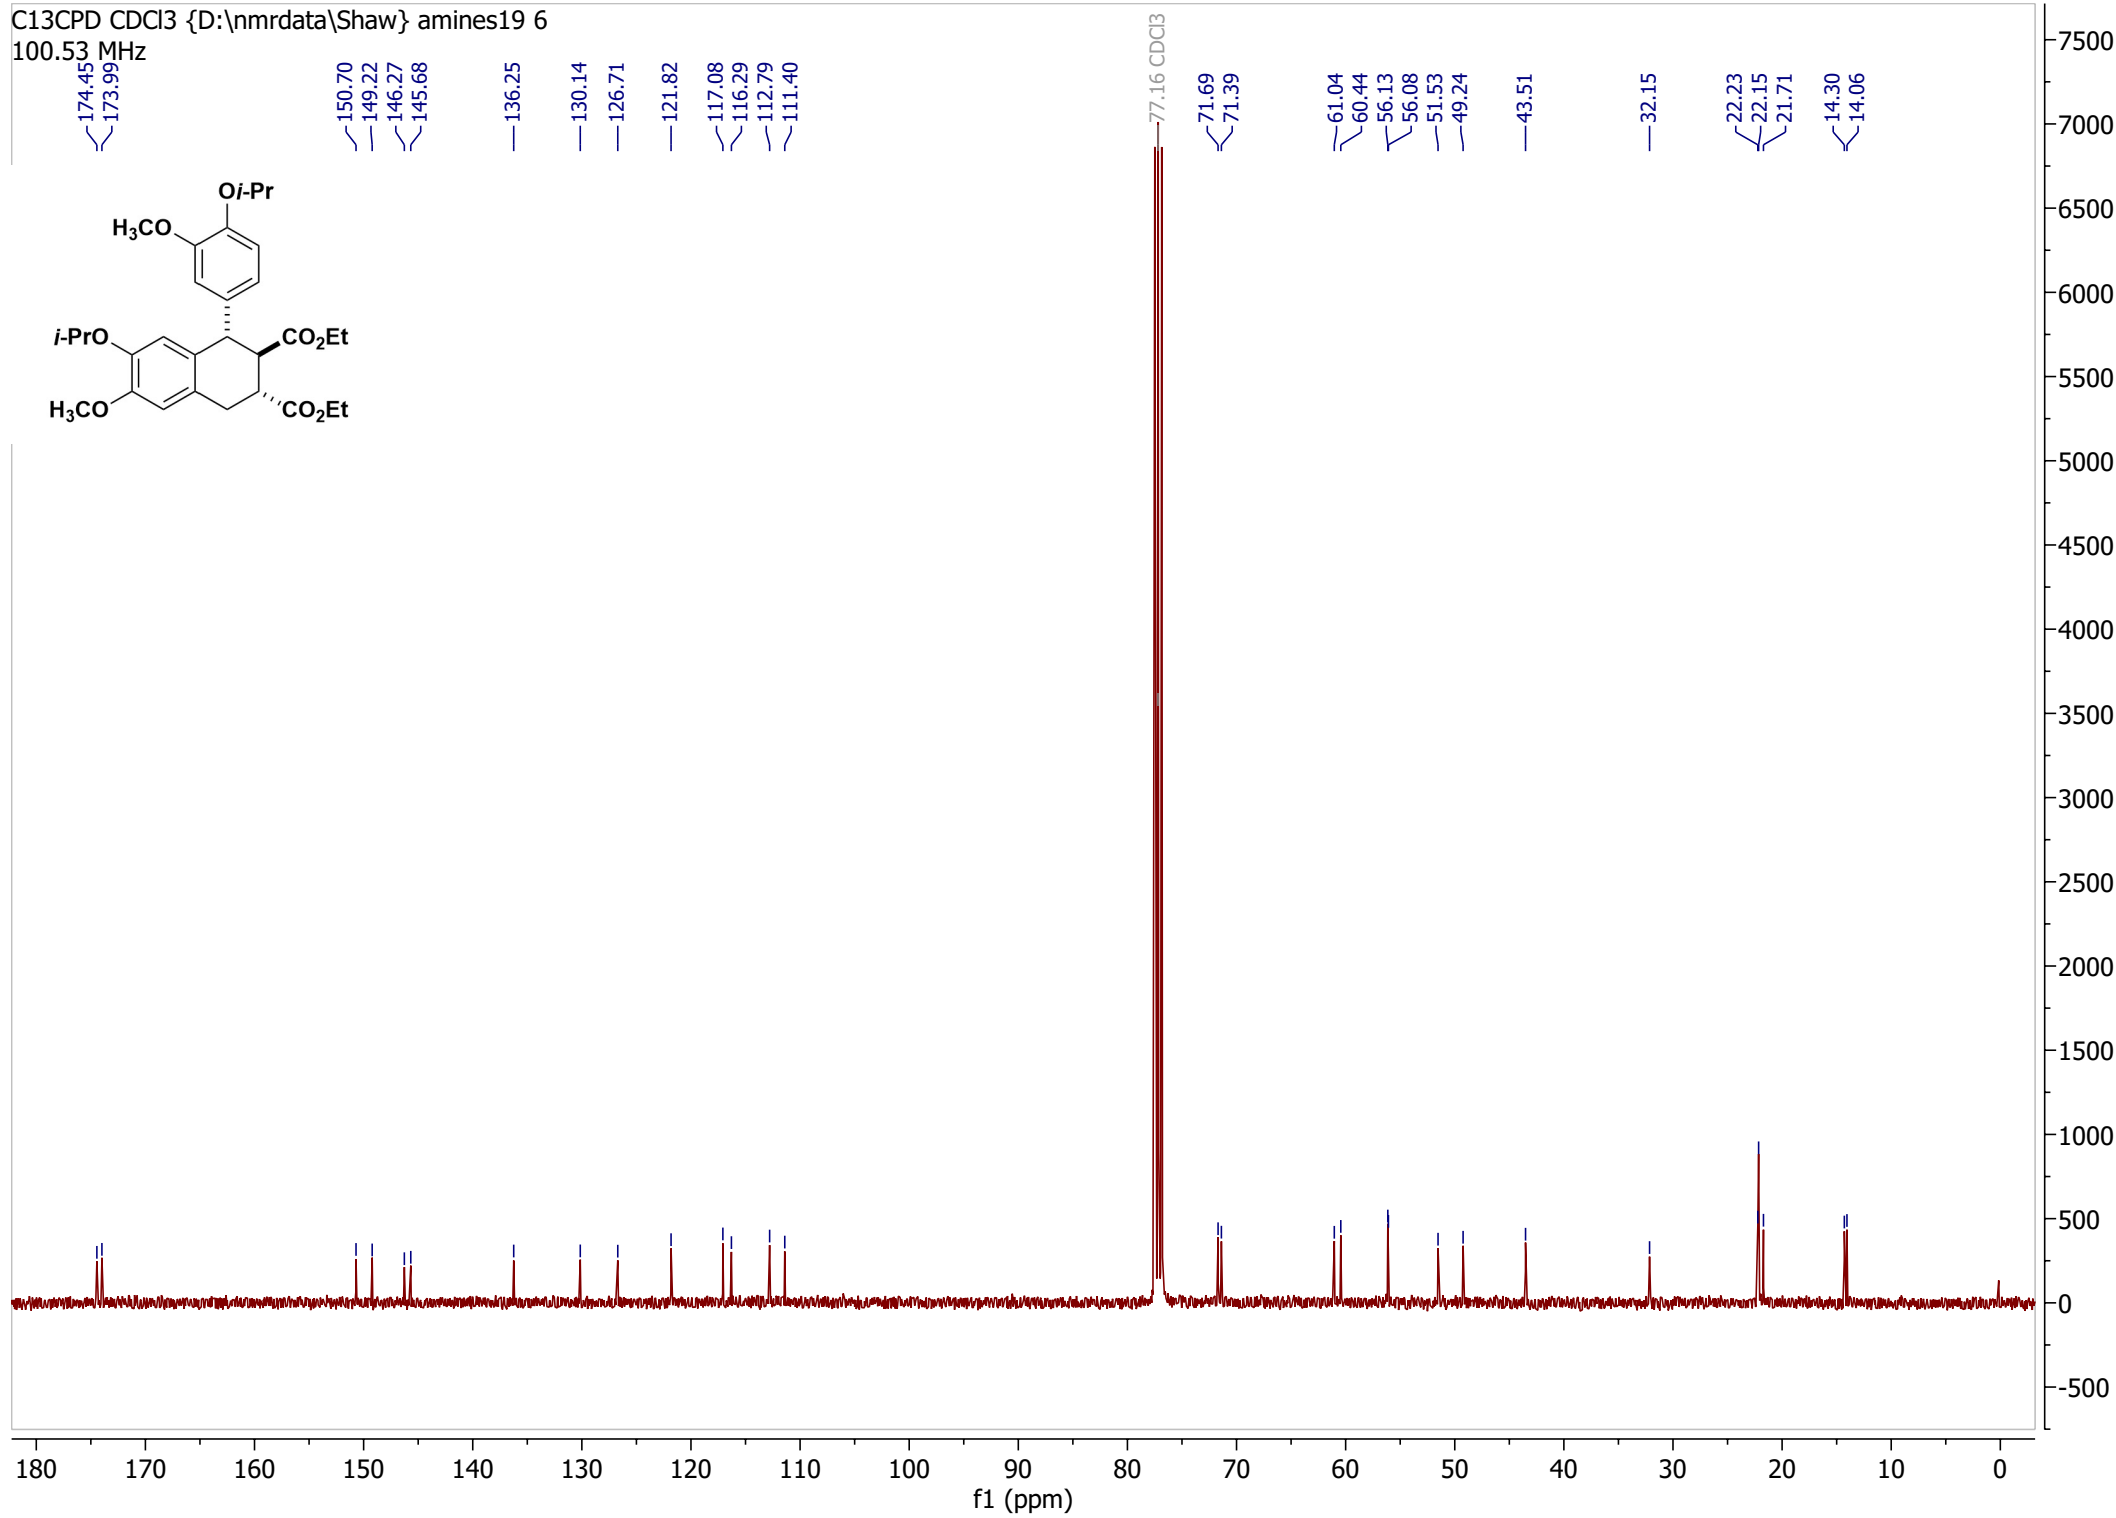

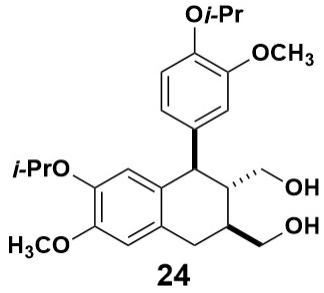

6.83  
6.81  
6.69  
6.68  
6.67  
6.66  
6.60  
6.60  
6.59  
6.21

4.50  
4.49  
4.47  
4.18  
4.16  
4.15  
4.13  
4.12

3.86  
3.85  
3.83  
3.83  
3.82  
3.81  
3.79  
3.78  
3.78  
3.77  
3.77  
3.76  
3.75  
3.72  
3.70  
3.69  
3.68  
3.67  
3.66  
3.66  
3.65  
3.65  
3.64  
3.64  
3.62  
3.52  
3.50  
3.49  
3.48  
2.78  
2.75  
2.74  
2.73  
1.36  
1.36  
1.35  
1.34  
1.19  
1.18  
1.10  
1.09

B (dd) 6.67  
A (d) 6.82  
D (s) 6.21  
C (m) 6.60

F (p) 4.15  
E (m) 4.49  
H (m) 3.65  
G (m) 3.78  
I (dd) 3.50

J (m) 2.75

L (d) 1.19  
K (dd) 1.35  
M (d) 1.10

0.94  
0.94  
1.96  
0.91

0.79  
0.94  
9.88  
1.09  
0.99

1.98

5.95  
2.81  
2.83

8.0 7.5 7.0 6.5 6.0 5.5 5.0 4.5 4.0 3.5 3.0 2.5 2.0 1.5 1.0 0.5 0.0 -0.5  
f1 (ppm)

13000  
12000  
11000  
10000  
9000  
8000  
7000  
6000  
5000  
4000  
3000  
2000  
1000  
0  
-1000  
0.00 TMS

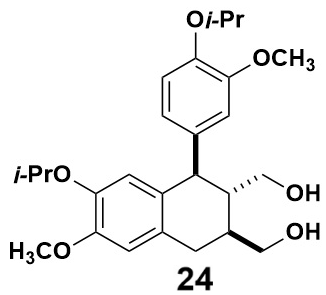

150.69  
148.72  
145.81  
145.17

138.66

132.12  
128.87

121.99  
118.13  
116.26  
112.98  
111.50

77.16 CDCl3

71.68  
71.39

66.52  
62.94  
62.83

56.15  
56.01

48.19  
48.11

40.12

33.33  
29.98

22.23  
22.20  
22.10  
21.71

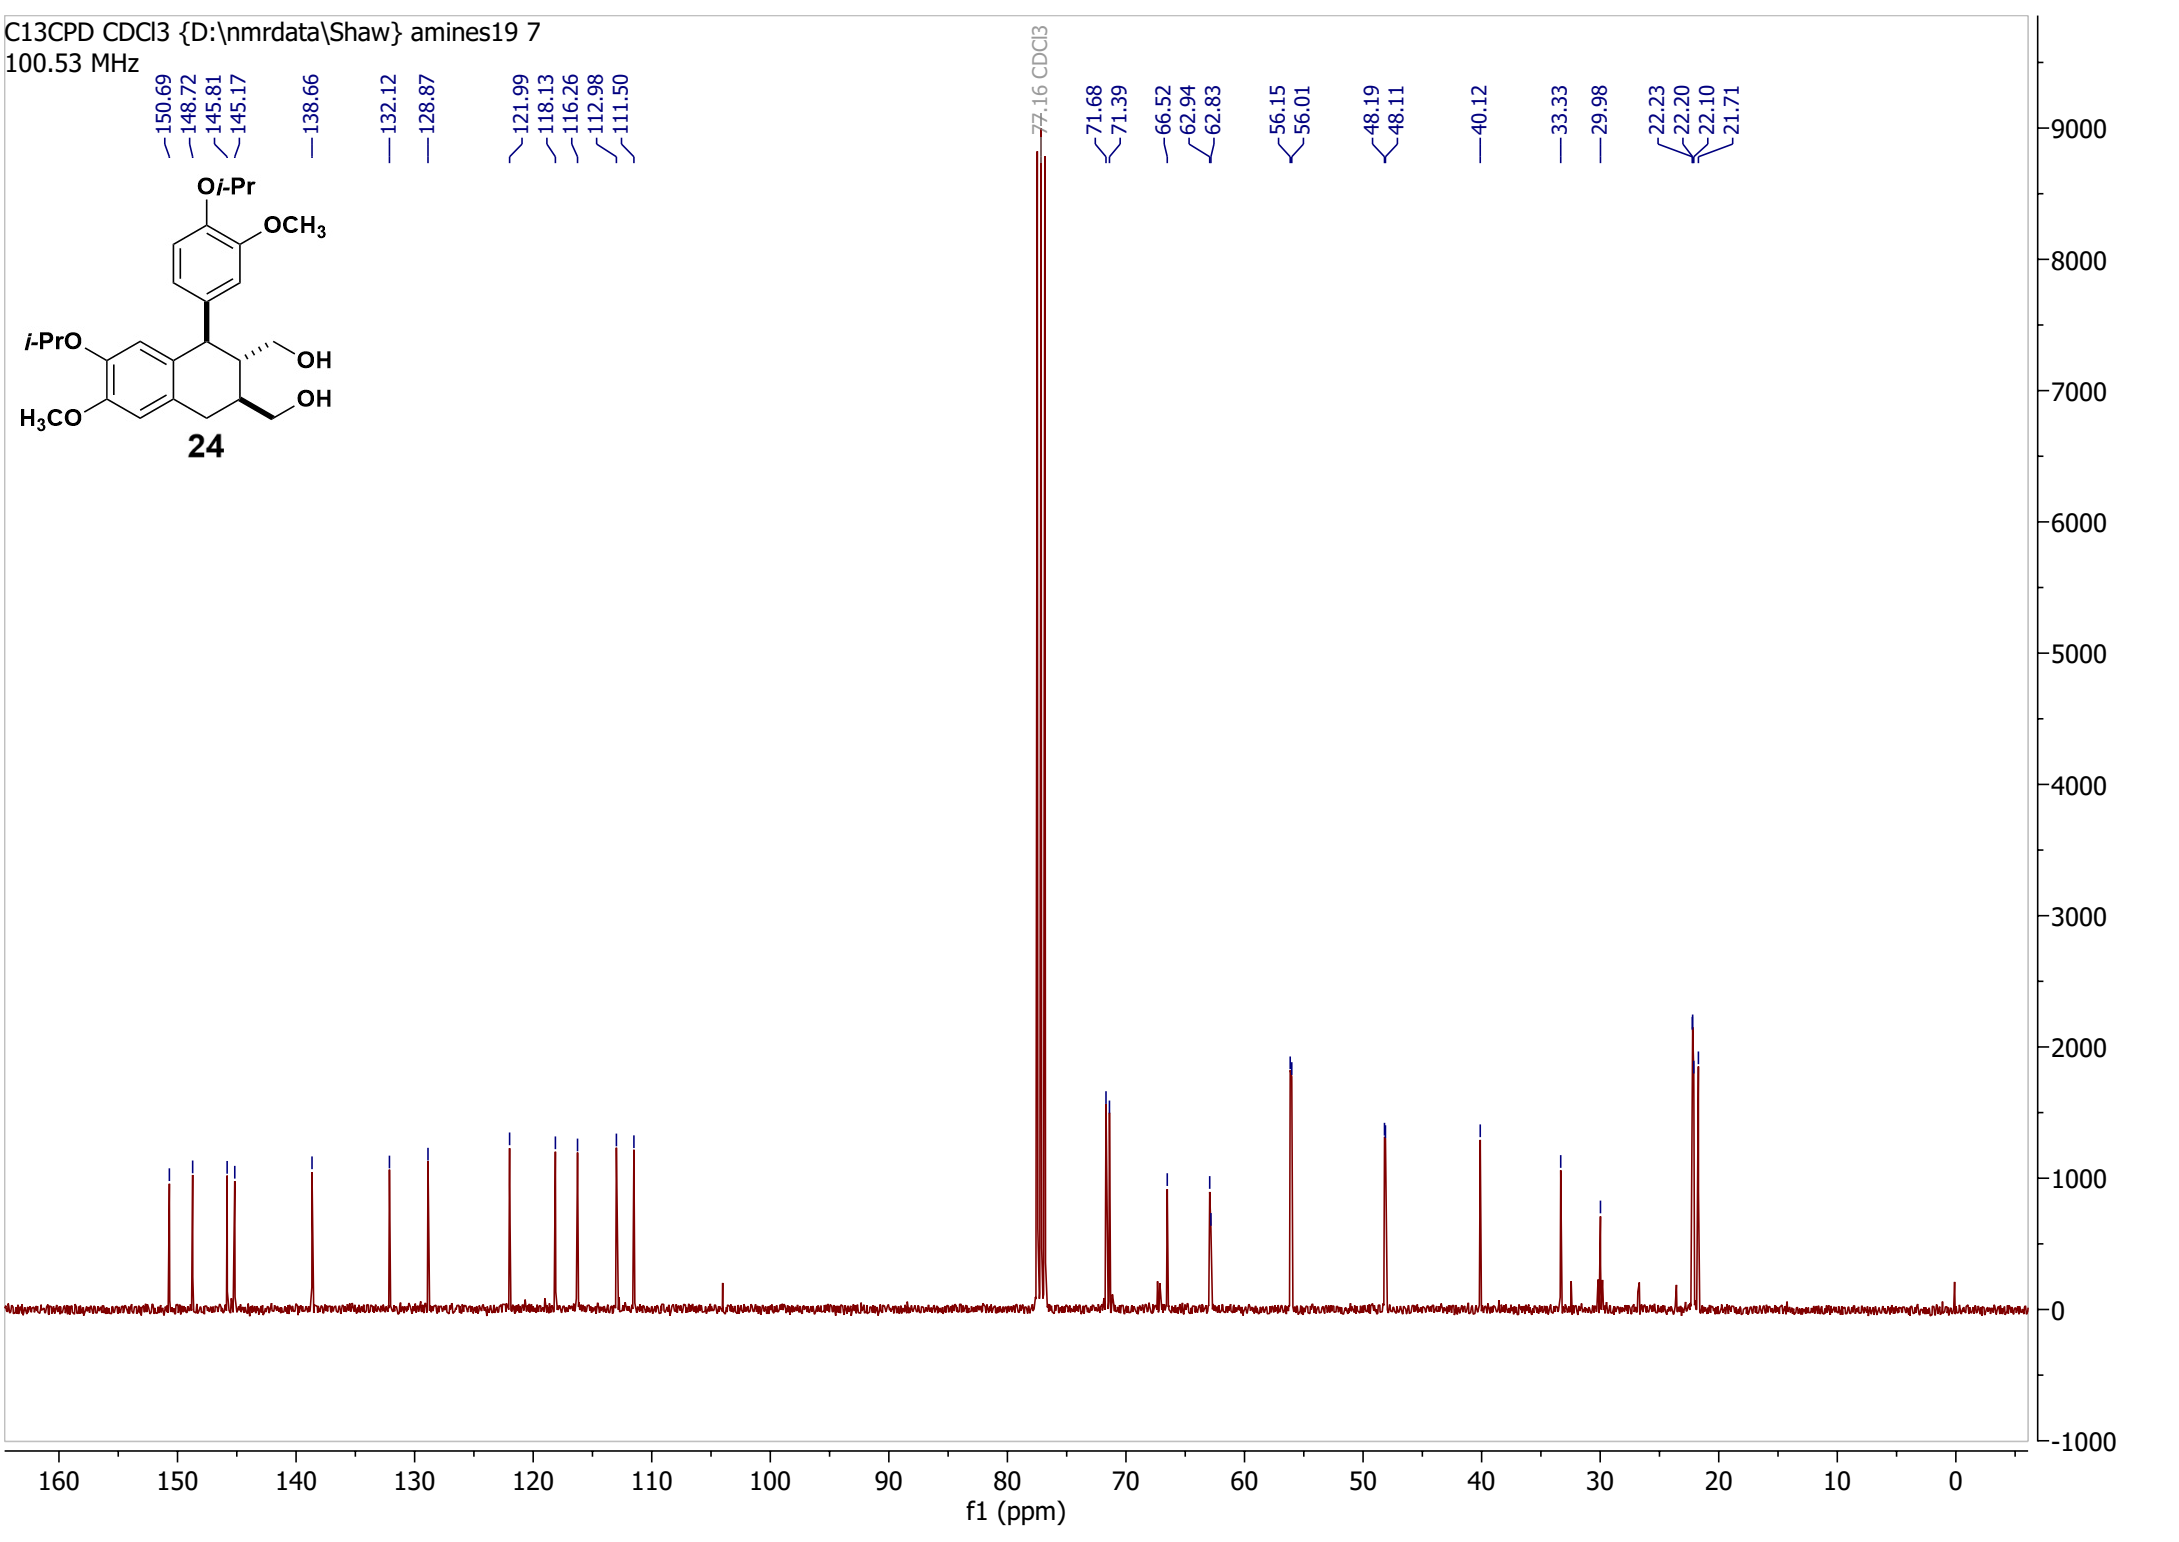

f1 (ppm)

9000  
8000  
7000  
6000  
5000  
4000  
3000  
2000  
1000  
0  
-1000
